# Supplementary material for: Immune infiltration and prognosis in gastric cancer: role of NAD+ metabolism-related markers
Source: PeerJ. 2024 Jul 31;12:e17833. doi: 10.7717/peerj.17833 (PMC11297443; doi:10.7717/peerj.17833)
Supplement: Supplemental Information 2 — A total of 5,018 DEGs1 between GC and paraneoplastic tissues were obtained [file peerj-12-17833-s002.xlsx]

## Sheet: Sheet1
	logFC	AveExpr	t	P.Value	adj.P.Val	B	change
GGT6	-1.177	9.02423	-2.12192	0.034445	0.0495012	-4.86899	Down
GBP6	-1.03226	4.72389	-2.12237	0.0344071	0.0494566	-4.86806	Down
SLC15A1	-1.29527	6.65381	-2.2087	0.0277492	0.0406577	-4.68402	Down
TMEM238L	-1.01793	8.28029	-2.21123	0.0275729	0.0404057	-4.67854	Down
UGT2B17	-1.37616	3.86914	-2.23784	0.0257693	0.0380107	-4.6203	Down
GSTM1	-1.48756	6.66044	-2.26538	0.0240117	0.0356523	-4.55931	Down
GNG4	-1.06026	7.12325	-2.26601	0.0239729	0.0355975	-4.55791	Down
CLCA4	-1.2917	4.06396	-2.27025	0.0237123	0.035247	-4.54846	Down
FCER2	-1.02511	5.09129	-2.30752	0.0215245	0.032273	-4.46459	Down
ACE2	-1.13545	8.29068	-2.31582	0.0210619	0.0316378	-4.44573	Down
LCT	-1.07458	3.51618	-2.32617	0.0204977	0.0308774	-4.42213	Down
FCGBP	-1.24261	11.9586	-2.32801	0.0203989	0.0307484	-4.41793	Down
ASCL1	-1.04463	3.4922	-2.33147	0.0202138	0.0304966	-4.41001	Down
TMPRSS11E	-1.27653	2.65103	-2.33626	0.0199599	0.030155	-4.39901	Down
CYP2C18	-1.05459	8.81391	-2.34563	0.0194722	0.0294803	-4.37747	Down
KRTDAP	-1.03634	2.06349	-2.3581	0.0188387	0.0286095	-4.34865	Down
CAPN9	-1.18496	7.18709	-2.36935	0.0182829	0.0278402	-4.32253	Down
AADAC	-1.2607	7.62725	-2.39327	0.0171491	0.0262661	-4.2666	Down
IRS4	-1.03947	2.04433	-2.39461	0.0170874	0.0261802	-4.26345	Down
PGC	-2.0799	12.2603	-2.40234	0.0167357	0.0256834	-4.24525	Down
C17orf78	-1.14903	4.74135	-2.41337	0.0162446	0.0249772	-4.21917	Down
C11orf86	-1.36034	5.62274	-2.41567	0.0161439	0.0248387	-4.21372	Down
BARX1	-1.06169	9.60315	-2.43557	0.0152949	0.0236593	-4.16635	Down
L1CAM	-1.09249	8.79505	-2.44381	0.0149551	0.023205	-4.14663	Down
EYA2	-1.06818	7.87537	-2.44958	0.0147208	0.0228719	-4.13276	Down
TMEM179	-1.01898	2.58725	-2.44978	0.0147127	0.0228632	-4.13227	Down
PLAAT1	-1.00005	3.91874	-2.4545	0.014524	0.0226019	-4.12093	Down
CRCT1	-1.42317	2.17948	-2.48754	0.0132605	0.0207885	-4.04083	Down
APOD	-1.14035	11.0584	-2.49501	0.0129888	0.0203968	-4.02258	Down
CCDC169	-1.01711	3.89337	-2.49852	0.012863	0.0202196	-4.01399	Down
SEMA3E	-1.19029	7.15571	-2.49939	0.012832	0.0201726	-4.01186	Down
AMER3	-1.08534	3.21424	-2.50906	0.0124912	0.0196849	-3.98811	Down
SNAP25	-1.14189	6.13443	-2.533	0.011682	0.0184926	-3.92894	Down
REG3A	-2.2829	8.22373	-2.53839	0.0115063	0.0182284	-3.91554	Down
MGAM	-1.02867	7.51766	-2.54792	0.0112016	0.017794	-3.89178	Down
GATA5	-1.59403	6.54399	-2.55077	0.011112	0.0176608	-3.88467	Down
ALDOB	-1.60993	9.37124	-2.56555	0.0106569	0.0169983	-3.84762	Down
DCHS2	-1.11307	6.54146	-2.57202	0.0104629	0.0167147	-3.83134	Down
TFF2	-1.95954	10.163	-2.5835	0.0101264	0.0162272	-3.80233	Down
CXCL14	-1.06619	11.626	-2.5884	0.00998598	0.0160324	-3.78993	Down
PWWP3B	-1.0821	2.89794	-2.59055	0.00992492	0.0159399	-3.78449	Down
CBLN1	-1.10193	3.71662	-2.60457	0.00953439	0.0153643	-3.74882	Down
UPK1B	-1.55551	5.63101	-2.61833	0.00916442	0.0148181	-3.71362	Down
ARHGEF4	-1.01261	8.49024	-2.63368	0.00876688	0.0142197	-3.67414	Down
SPTSSB	-1.22187	8.29323	-2.65087	0.00834035	0.0135893	-3.62969	Down
LTF	-1.58453	9.78931	-2.65469	0.00824804	0.013453	-3.61977	Down
KRT20	-2.03401	8.89466	-2.65756	0.00817931	0.0133503	-3.6123	Down
CASR	-1.00184	2.73671	-2.66343	0.0080404	0.0131477	-3.59702	Down
ADH4	-1.52646	5.65455	-2.66719	0.00795254	0.0130086	-3.58721	Down
FBP2	-1.07938	5.36533	-2.67359	0.0078051	0.0127865	-3.5705	Down
SLC2A2	-1.28857	3.06804	-2.6771	0.00772511	0.0126688	-3.5613	Down
PCSK1N	-1.62271	8.17689	-2.69266	0.00737989	0.0121465	-3.52044	Down
LHFPL4	-1.00064	3.90374	-2.71535	0.0069011	0.0114088	-3.46041	Down
ADH1C	-1.53379	9.96944	-2.71722	0.00686292	0.0113507	-3.45544	Down
GABRG2	-1.20224	2.2756	-2.72638	0.00667874	0.0110726	-3.43107	Down
SLURP1	-1.36018	1.8815	-2.7279	0.00664853	0.0110275	-3.42701	Down
GBA3	-1.53086	4.90826	-2.72839	0.00663886	0.0110124	-3.4257	Down
CILP	-1.31022	8.1944	-2.73153	0.00657718	0.0109149	-3.41734	Down
PTGIS	-1.19986	10.1822	-2.76138	0.00601509	0.0100492	-3.33718	Down
SLIT2	-1.03836	8.7716	-2.76863	0.00588537	0.00985768	-3.3176	Down
PAPPA2	-1.09944	4.83915	-2.77919	0.00570081	0.00957392	-3.28896	Down
FAM3B	-1.43465	9.34188	-2.78244	0.00564521	0.00949595	-3.28015	Down
DYNAP	-1.11164	1.23952	-2.7868	0.00557115	0.00938322	-3.26827	Down
NRG1	-1.07096	7.39193	-2.79706	0.00540057	0.00911569	-3.24029	Down
FAM25A	-1.18301	1.39224	-2.79993	0.00535362	0.00904382	-3.23243	Down
SLC28A2	-1.70395	6.94422	-2.80697	0.00524021	0.00886749	-3.21316	Down
NBEA	-1.05154	8.46438	-2.80972	0.00519657	0.00880404	-3.20562	Down
KCNH2	-1.09306	9.34996	-2.82793	0.00491538	0.00836413	-3.15549	Down
CDHR1	-1.24664	5.13421	-2.83302	0.00483935	0.00824756	-3.14144	Down
LMO1	-1.35053	2.93694	-2.85008	0.004592	0.00785545	-3.09409	Down
CLVS2	-1.31288	2.5944	-2.85478	0.00452593	0.00774882	-3.08101	Down
ERICH4	-1.21227	3.45341	-2.85916	0.00446513	0.00765809	-3.06879	Down
NGFR	-1.29097	7.5328	-2.86018	0.0044511	0.00763613	-3.06595	Down
VSIG2	-1.40941	10.2325	-2.86263	0.00441751	0.0075834	-3.05911	Down
ASPG	-1.05236	5.45118	-2.87156	0.00429694	0.00739549	-3.0341	Down
SPON1	-1.0633	11.4085	-2.87266	0.00428232	0.00737167	-3.03102	Down
PTPRN	-1.24095	5.69434	-2.87596	0.00423869	0.00730805	-3.02176	Down
SLITRK2	-1.03877	3.45537	-2.88164	0.00416466	0.00719039	-3.00583	Down
NCCRP1	-1.44222	5.92765	-2.89085	0.0040469	0.00700069	-2.97989	Down
CALML5	-1.41305	1.99142	-2.89109	0.00404392	0.00699618	-2.97922	Down
RBM11	-1.07443	4.56125	-2.89386	0.00400913	0.00694243	-2.9714	Down
KRBOX1	-1.00498	3.58181	-2.89467	0.00399897	0.00692676	-2.9691	Down
FMN2	-1.24886	5.04452	-2.90247	0.00390275	0.00677348	-2.94705	Down
NKX2-2	-1.26566	2.17095	-2.90669	0.00385149	0.00668933	-2.93508	Down
ATRNL1	-1.01916	5.45514	-2.9136	0.00376904	0.00655468	-2.91548	Down
SYNC	-1.01684	7.4525	-2.94486	0.00341553	0.00598833	-2.82619	Down
KBTBD12	-1.4178	6.5112	-2.94724	0.00338994	0.00594923	-2.81936	Down
SVOP	-1.07797	3.72704	-2.96772	0.00317648	0.00560521	-2.7603	Down
PHF21B	-1.0245	3.21177	-2.97459	0.00310771	0.0054901	-2.74041	Down
SCG2	-1.11949	7.00261	-2.97796	0.00307447	0.00543498	-2.73064	Down
ITLN2	-1.40073	3.13726	-2.99961	0.00286856	0.0050932	-2.66759	Down
SEMA3D	-1.15171	6.73005	-3.01123	0.00276336	0.00492141	-2.63358	Down
WNT9A	-1.0688	7.45277	-3.01385	0.00274011	0.00488281	-2.62589	Down
GABRA4	-1.2106	3.2743	-3.01532	0.00272717	0.00486207	-2.62158	Down
NFASC	-1.02688	9.9903	-3.01547	0.00272584	0.00486017	-2.62113	Down
GRIA1	-1.09396	3.72797	-3.0187	0.00269761	0.00481305	-2.61165	Down
GAS1	-1.10713	9.01208	-3.02282	0.00266198	0.0047554	-2.59954	Down
ART3	-1.0122	4.37633	-3.03521	0.00255735	0.00458429	-2.56299	Down
LRRC10B	-1.03349	5.92042	-3.04243	0.00249809	0.00448669	-2.54162	Down
KIF1A	-1.70932	6.02653	-3.04492	0.00247797	0.004454	-2.53425	Down
BOC	-1.05874	9.57176	-3.04553	0.00247306	0.00444602	-2.53243	Down
FAIM2	-1.01489	7.5365	-3.0468	0.00246284	0.00442978	-2.52866	Down
SOX2	-1.67929	7.62805	-3.04832	0.00245069	0.00440963	-2.52415	Down
CLDN10	-1.51449	3.94379	-3.06573	0.00231545	0.00418648	-2.47234	Down
MT1G	-1.27024	9.96193	-3.06939	0.00228794	0.00414078	-2.46143	Down
MUCL3	-2.22124	10.317	-3.07399	0.00225373	0.00408639	-2.44767	Down
SYT16	-1.17787	4.08392	-3.08832	0.00215022	0.00392007	-2.40472	Down
FRMD1	-1.43695	4.75484	-3.08849	0.002149	0.00391821	-2.4042	Down
ADCYAP1	-1.30103	5.024	-3.09167	0.00212663	0.00388009	-2.39464	Down
LINGO2	-1.0244	2.78578	-3.10922	0.00200706	0.00368248	-2.34172	Down
FGF14	-1.10292	6.08217	-3.11344	0.00197922	0.00363533	-2.32894	Down
NRSN1	-1.19037	2.33253	-3.11378	0.00197701	0.00363234	-2.32792	Down
EDN3	-1.58155	6.99574	-3.11609	0.00196192	0.0036064	-2.32091	Down
GALNT16	-1.13422	7.28475	-3.12562	0.00190094	0.00349947	-2.29201	Down
SRRM4	-1.00704	2.49352	-3.13952	0.00181506	0.00335196	-2.24967	Down
OTC	-1.9319	5.34009	-3.14438	0.00178591	0.0033037	-2.23484	Down
TMPRSS11B	-1.65521	1.60769	-3.15739	0.00170989	0.0031722	-2.19498	Down
PCDH9	-1.26085	6.86486	-3.15788	0.00170711	0.003168	-2.19349	Down
TIMP4	-1.01449	6.41039	-3.16019	0.00169393	0.0031451	-2.18638	Down
SHISAL1	-1.19618	7.75866	-3.1629	0.00167864	0.00311888	-2.17806	Down
CHRM1	-1.27724	4.40796	-3.16896	0.00164484	0.0030628	-2.15941	Down
CPA3	-1.10247	9.19826	-3.17953	0.00158746	0.00296454	-2.12683	Down
FGF10	-1.32115	6.06101	-3.19182	0.00152299	0.00285358	-2.08878	Down
NTNG1	-1.19939	3.87917	-3.1979	0.00149201	0.00280088	-2.06991	Down
PPP1R12B	-1.06368	12.7427	-3.20038	0.00147954	0.00277888	-2.0622	Down
CYS1	-1.17261	7.71822	-3.20651	0.00144918	0.00272514	-2.04315	Down
DGKB	-1.23763	4.54322	-3.21366	0.00141443	0.00266464	-2.02085	Down
GSTA2	-1.82062	5.02838	-3.2194	0.00138712	0.00261556	-2.00293	Down
ACER1	-1.12214	2.37432	-3.22364	0.00136725	0.00258018	-1.98966	Down
COL21A1	-1.0746	6.53883	-3.2253	0.00135952	0.00256692	-1.98445	Down
NEUROD1	-1.50205	3.2993	-3.22571	0.00135764	0.00256386	-1.98318	Down
NELL1	-1.3617	4.26578	-3.22663	0.00135338	0.00255738	-1.98029	Down
B3GAT1	-1.03593	6.02582	-3.22793	0.00134742	0.00254675	-1.97623	Down
NUPR2	-1.5857	2.94942	-3.22976	0.00133903	0.00253232	-1.97049	Down
TPSB2	-1.17492	9.02162	-3.23178	0.00132986	0.00251726	-1.96417	Down
TUBB4A	-1.11159	5.63294	-3.24404	0.00127529	0.00242136	-1.92563	Down
RIMBP2	-1.42912	6.22817	-3.2639	0.0011913	0.00227114	-1.86291	Down
PLA2G5	-1.02646	5.64123	-3.26745	0.00117682	0.00224605	-1.85164	Down
C10orf82	-1.44288	3.29609	-3.27468	0.0011479	0.00219557	-1.82872	Down
COL19A1	-1.35048	4.54203	-3.29088	0.00108541	0.00208576	-1.77713	Down
ADAMTS8	-1.34131	7.3882	-3.29288	0.0010779	0.00207253	-1.77073	Down
RYR2	-1.228	8.06943	-3.29742	0.00106107	0.00204228	-1.75622	Down
ALDH1L1	-1.49886	6.36713	-3.29921	0.00105452	0.0020305	-1.75051	Down
RNF165	-1.04844	5.32787	-3.30615	0.00102942	0.00198649	-1.72829	Down
ABCA9	-1.13048	7.07644	-3.30932	0.00101812	0.0019657	-1.71811	Down
IGHV3OR16-17	-1.52361	3.90782	-3.30941	0.00101782	0.00196533	-1.71784	Down
RIPPLY2	-1.06576	1.49614	-3.31246	0.00100706	0.00194616	-1.70803	Down
FAXC	-1.36798	6.79507	-3.31376	0.00100253	0.00193862	-1.70388	Down
ADCY2	-1.18888	6.99365	-3.31477	0.000998991	0.00193237	-1.70061	Down
NPR3	-1.20985	7.08548	-3.31482	0.000998828	0.00193226	-1.70046	Down
SPRR2F	-1.47499	1.77888	-3.32414	0.000966904	0.00187536	-1.67048	Down
RERG	-1.10217	8.53893	-3.33567	0.000928707	0.00180695	-1.63326	Down
TBL1Y	-1.04868	1.45793	-3.3375	0.000922747	0.00179645	-1.62732	Down
LPAR3	-1.23267	4.57781	-3.34083	0.000912075	0.00177771	-1.61657	Down
GPT	-1.18293	8.1214	-3.34169	0.000909307	0.00177269	-1.61377	Down
BEX1	-1.87968	4.60237	-3.34306	0.000904961	0.00176514	-1.60934	Down
ATP2B3	-1.0323	2.31124	-3.3459	0.000895988	0.00174892	-1.60013	Down
MGAT4C	-1.264	3.44993	-3.34793	0.000889628	0.00173723	-1.59355	Down
NRG4	-1.13433	5.82372	-3.34902	0.000886217	0.00173148	-1.59	Down
ATCAY	-1.10661	3.5769	-3.34934	0.000885232	0.00172973	-1.58897	Down
TOX	-1.07119	9.20729	-3.3501	0.000882877	0.00172567	-1.58651	Down
GRIK2	-1.09726	4.25498	-3.35552	0.000866219	0.00169578	-1.56891	Down
CAND2	-1.07129	7.52564	-3.35556	0.000866102	0.00169573	-1.56878	Down
AS3MT	-1.08634	3.50153	-3.35917	0.000855155	0.00167553	-1.55703	Down
ADARB2	-1.09143	5.0625	-3.3618	0.000847258	0.0016604	-1.54845	Down
SALL2	-1.11347	7.78318	-3.36211	0.000846332	0.00165894	-1.54744	Down
TUB	-1.11658	7.29144	-3.36586	0.000835229	0.00163855	-1.53523	Down
NRG3	-1.23387	3.67305	-3.3702	0.000822526	0.00161533	-1.52106	Down
IL36A	-1.53739	1.26893	-3.37099	0.000820241	0.00161135	-1.51849	Down
VXN	-1.19023	4.22412	-3.37225	0.000816605	0.00160489	-1.51438	Down
TPO	-1.35286	5.08464	-3.37664	0.000804021	0.00158166	-1.50002	Down
APOA1	-2.25045	6.79789	-3.37937	0.000796322	0.00156817	-1.49112	Down
GNAZ	-1.0095	8.56633	-3.38003	0.000794441	0.00156463	-1.48893	Down
AOX1	-1.28752	7.55843	-3.38087	0.000792096	0.00156034	-1.48619	Down
SMPX	-1.94758	3.882	-3.38099	0.000791744	0.00155981	-1.48578	Down
NPY1R	-1.41192	5.14086	-3.38429	0.000782553	0.00154363	-1.47498	Down
RORB	-1.06781	5.61149	-3.39065	0.000765124	0.00151232	-1.45414	Down
FBXO27	-1.06483	7.2173	-3.39085	0.000764571	0.00151139	-1.45347	Down
TNS1	-1.07757	13.722	-3.40691	0.000722156	0.00143301	-1.40063	Down
ADAMTS15	-1.08918	7.88451	-3.40904	0.00071669	0.00142383	-1.3936	Down
MLN	-1.60858	2.05976	-3.41915	0.000691289	0.00137777	-1.36017	Down
CERS4	-1.02394	9.11411	-3.42063	0.000687654	0.00137156	-1.35529	Down
SERPINI2	-1.00185	1.72652	-3.42896	0.000667461	0.00133413	-1.32767	Down
ADGRL3	-1.09565	8.03043	-3.43066	0.000663417	0.00132733	-1.32204	Down
CCK	-1.64268	4.9329	-3.43269	0.000658614	0.00131871	-1.3153	Down
CA4	-1.71505	4.94433	-3.43509	0.000652953	0.00130836	-1.3073	Down
SLC7A14	-1.39285	3.25108	-3.44017	0.000641165	0.00128779	-1.29041	Down
PCDH10	-1.63458	4.75523	-3.44098	0.000639297	0.00128445	-1.28771	Down
C14orf39	-1.01902	2.33023	-3.44452	0.000631233	0.00126934	-1.27594	Down
UNC45B	-1.22717	3.73562	-3.44635	0.000627078	0.00126194	-1.26981	Down
SLITRK5	-1.57166	5.5727	-3.44682	0.000626024	0.00125995	-1.26825	Down
FADS6	-1.6653	3.96853	-3.45171	0.00061511	0.00124026	-1.25194	Down
PTGER3	-1.15831	8.33525	-3.45233	0.000613742	0.00123804	-1.24988	Down
SLC8A2	-1.64385	5.53526	-3.45397	0.000610131	0.00123129	-1.24441	Down
GSTA1	-2.10635	8.39961	-3.45913	0.000598891	0.00121057	-1.22716	Down
CXCR2	-1.22733	6.55513	-3.46153	0.000593718	0.0012009	-1.21911	Down
B4GALNT2	-1.7242	4.27255	-3.46789	0.000580233	0.00117541	-1.19779	Down
SPARCL1	-1.05737	13.306	-3.47159	0.000572532	0.00116094	-1.18539	Down
MUSK	-1.36099	5.14398	-3.47522	0.000565064	0.0011473	-1.1732	Down
STMN2	-1.57611	5.53508	-3.47771	0.000559995	0.00113775	-1.16484	Down
DGKK	-1.1542	1.66192	-3.48334	0.00054867	0.0011162	-1.14587	Down
CPLX2	-1.6952	4.80897	-3.48573	0.000543945	0.00110743	-1.13784	Down
ZDHHC15	-1.04641	5.69801	-3.49125	0.000533133	0.00108756	-1.11919	Down
DCLK1	-1.21494	8.00023	-3.49604	0.000523938	0.00107044	-1.10303	Down
CPA1	-1.51772	2.48964	-3.51377	0.000491144	0.00100775	-1.04297	Down
TRIM55	-1.09996	2.78768	-3.5149	0.000489127	0.00100416	-1.03915	Down
SMYD1	-2.33263	4.45002	-3.51716	0.000485101	0.000996554	-1.03146	Down
TMEM74	-1.04532	3.34154	-3.51736	0.000484747	0.000996047	-1.03078	Down
DIRAS3	-1.06768	6.29967	-3.52028	0.000479602	0.000986453	-1.02086	Down
BHMT	-1.36441	3.82393	-3.52363	0.000473742	0.000975692	-1.00943	Down
SETBP1	-1.04193	9.63776	-3.52416	0.000472836	0.000974041	-1.00765	Down
MSRB3	-1.10321	10.6542	-3.52544	0.000470617	0.000969899	-1.00328	Down
TUNAR	-1.17737	1.93227	-3.52923	0.000464122	0.000957891	-0.990359	Down
C1QTNF9	-1.00011	3.03957	-3.52941	0.000463829	0.000957392	-0.989772	Down
LRRTM3	-1.04792	1.54161	-3.53903	0.000447733	0.000926218	-0.956919	Down
GPR17	-1.19281	4.86141	-3.53996	0.000446204	0.000923158	-0.953738	Down
MS4A2	-1.14733	6.82064	-3.54527	0.000437576	0.000907322	-0.935572	Down
ANO5	-1.46577	7.80512	-3.54756	0.000433902	0.000900404	-0.927725	Down
TPSD1	-1.73237	5.66433	-3.55104	0.000428371	0.000889388	-0.915787	Down
NDST4	-1.31752	2.70519	-3.56586	0.000405567	0.000844615	-0.864866	Down
SLC30A8	-1.38135	3.25741	-3.56688	0.000404039	0.00084162	-0.861351	Down
SNAP91	-1.55266	4.05094	-3.56896	0.000400949	0.000835838	-0.854203	Down
FLNC	-1.65608	11.9068	-3.58599	0.000376406	0.000788376	-0.795367	Down
MAP7D2	-1.7293	5.99897	-3.58659	0.000375577	0.000787081	-0.793312	Down
GYS2	-1.28613	2.5699	-3.59177	0.000368413	0.000773198	-0.775366	Down
SMOC2	-1.31634	11.3002	-3.60058	0.000356521	0.000749591	-0.744786	Down
GCOM1	-1.05861	5.59973	-3.60523	0.000350388	0.000737778	-0.728612	Down
FGF2	-1.12623	8.25358	-3.60658	0.000348632	0.00073442	-0.723928	Down
NTF3	-1.04387	5.66256	-3.60682	0.000348319	0.000733918	-0.723089	Down
DCT	-1.09253	2.88569	-3.60751	0.000347417	0.000732431	-0.720671	Down
DEFB4A	-1.72917	2.01024	-3.62186	0.000329272	0.000697095	-0.670649	Down
AGTR2	-1.28021	1.36359	-3.62217	0.000328894	0.000696374	-0.669578	Down
TMEM255A	-1.05334	6.98643	-3.63003	0.000319339	0.00067776	-0.642075	Down
SLC38A3	-1.60888	5.14676	-3.633	0.000315804	0.000670944	-0.631688	Down
ZG16	-1.8168	4.0437	-3.63663	0.000311521	0.000662448	-0.618945	Down
LIX1	-1.44259	3.38975	-3.64208	0.000305202	0.000649753	-0.599821	Down
LRFN5	-1.07048	5.09567	-3.64477	0.000302129	0.00064365	-0.590373	Down
KIRREL3	-1.0762	4.597	-3.64506	0.000301794	0.00064301	-0.589338	Down
HS3ST4	-1.44596	2.42167	-3.64688	0.000299736	0.000639138	-0.582953	Down
DTNA	-1.29087	8.14452	-3.6496	0.000296685	0.000633139	-0.573402	Down
SEMA6D	-1.06407	8.52865	-3.65017	0.00029604	0.000631906	-0.571368	Down
PID1	-1.10044	9.00565	-3.65069	0.000295464	0.000630821	-0.56955	Down
ACTA2	-1.11025	13.8965	-3.66148	0.000283673	0.000607039	-0.531526	Down
SPOCK3	-1.33932	2.69589	-3.66179	0.000283345	0.000606476	-0.530445	Down
PDE4C	-1.20413	8.40531	-3.67005	0.00027462	0.000589424	-0.50123	Down
HAND2	-2.09749	7.37566	-3.67264	0.000271948	0.000584161	-0.492098	Down
KRTAP3-2	-1.01637	0.641649	-3.67604	0.00026846	0.000577666	-0.480036	Down
CHAT	-1.11989	1.43158	-3.68436	0.000260116	0.000560927	-0.450533	Down
CLEC4G	-1.10658	3.35915	-3.68736	0.000257169	0.0005551	-0.439882	Down
MB	-1.29829	3.70542	-3.68799	0.000256552	0.000553897	-0.437639	Down
CXCL17	-2.36498	9.54528	-3.69036	0.000254248	0.000549177	-0.429206	Down
UGT1A4	-1.0279	1.35644	-3.70128	0.000243892	0.000527725	-0.390331	Down
CNR1	-1.73768	6.56926	-3.70643	0.000239145	0.000517815	-0.371952	Down
CRNN	-2.41534	1.65079	-3.71112	0.0002349	0.000509271	-0.355202	Down
SCARA3	-1.13055	9.98749	-3.71375	0.000232556	0.000504603	-0.345823	Down
CPED1	-1.20032	10.0193	-3.71604	0.00023053	0.000500673	-0.337637	Down
S100A8	-1.67211	8.87972	-3.72699	0.000221055	0.000481609	-0.298371	Down
MFAP5	-1.39973	9.54464	-3.7381	0.000211829	0.000462861	-0.258474	Down
MAPT	-1.37208	7.08817	-3.74278	0.000208047	0.000455077	-0.241609	Down
ASXL3	-1.18235	5.58333	-3.74323	0.000207688	0.000454397	-0.23999	Down
FEV	-1.86124	3.76398	-3.74791	0.000203975	0.000446694	-0.223103	Down
IL1RAPL1	-1.12992	3.66504	-3.75481	0.000198624	0.000436052	-0.198211	Down
SCIN	-1.24725	9.02491	-3.75681	0.000197093	0.000432792	-0.190964	Down
RGS11	-1.16468	6.90402	-3.75936	0.000195166	0.000429207	-0.181763	Down
L3MBTL4	-1.13716	6.93902	-3.75988	0.000194774	0.000428457	-0.179879	Down
BVES	-1.24419	8.26221	-3.7717	0.000186068	0.000410808	-0.137043	Down
PTGDS	-1.29792	10.5688	-3.78696	0.000175374	0.000388533	-0.0815752	Down
CDH10	-1.44377	2.5388	-3.79604	0.000169286	0.000376262	-0.0484543	Down
TNMD	-1.0613	1.7166	-3.79953	0.000167	0.000371881	-0.0357074	Down
CABCOCO1	-1.06949	4.25721	-3.8009	0.000166114	0.00037004	-0.0307169	Down
PRELP	-1.62195	10.7423	-3.80316	0.000164658	0.000367016	-0.0224629	Down
TGFBR3	-1.03868	10.8221	-3.80523	0.000163333	0.000364193	-0.0148858	Down
BMP3	-2.18293	5.58838	-3.80602	0.000162833	0.000363173	-0.0120115	Down
FBXL22	-1.11334	7.48503	-3.8079	0.000161642	0.000360681	-0.0051254	Down
PENK	-2.01489	4.2555	-3.81609	0.00015655	0.000349697	0.0248957	Down
ZMAT4	-1.19014	1.8768	-3.8175	0.000155689	0.000347938	0.0300739	Down
SPRR2B	-1.17767	0.562952	-3.8205	0.000153875	0.000344132	0.041068	Down
CHRM4	-1.17488	4.29112	-3.82178	0.000153103	0.00034253	0.0457835	Down
SPHKAP	-1.34053	1.94167	-3.82761	0.000149643	0.00033515	0.0672343	Down
RTL5	-1.04886	7.92696	-3.83021	0.000148125	0.00033191	0.0768021	Down
JCHAIN	-1.87901	13.134	-3.83461	0.000145592	0.000326471	0.0929865	Down
SNTG2	-1.2351	3.43002	-3.83501	0.000145365	0.000326047	0.0944513	Down
FAT3	-1.59793	6.09243	-3.84599	0.00013922	0.000313577	0.134998	Down
MMP28	-1.17641	9.21248	-3.84682	0.000138768	0.00031271	0.13805	Down
CELF3	-1.64986	4.95644	-3.84777	0.00013825	0.000311693	0.141564	Down
SH3GL3	-1.44287	2.3661	-3.84893	0.000137619	0.000310347	0.145854	Down
CNTN3	-1.4473	4.25336	-3.85701	0.000133308	0.000301243	0.175744	Down
PDLIM3	-1.24239	11.6525	-3.8611	0.000131173	0.00029667	0.190908	Down
CA10	-1.21698	2.37283	-3.86181	0.000130804	0.000295908	0.193552	Down
ASTN1	-1.7222	4.21109	-3.86868	0.000127302	0.000288406	0.21904	Down
LRFN2	-1.39112	2.37586	-3.87759	0.000122891	0.000278988	0.252175	Down
SCGN	-2.09456	4.21924	-3.88978	0.000117087	0.00026695	0.297639	Down
SEC14L5	-1.359	5.61299	-3.89391	0.000115179	0.000262953	0.313086	Down
SFTPD	-1.40422	3.81641	-3.89477	0.000114786	0.000262201	0.316296	Down
SLITRK6	-1.5916	6.49469	-3.89637	0.00011406	0.000260686	0.322264	Down
PCP4	-1.96759	4.28239	-3.89798	0.000113329	0.000259175	0.328305	Down
C11orf96	-1.00622	11.5192	-3.90262	0.000111254	0.000254895	0.345676	Down
SLC6A15	-1.72376	3.05486	-3.90277	0.000111188	0.000254811	0.346233	Down
MEP1B	-1.89476	4.58037	-3.90386	0.000110707	0.000253801	0.350315	Down
LRP1B	-1.38086	3.89302	-3.90476	0.000110311	0.000252986	0.353685	Down
CCNA1	-1.10833	2.79951	-3.9086	0.000108635	0.000249453	0.368081	Down
RND2	-1.27069	5.91288	-3.91392	0.000106355	0.000244728	0.388026	Down
FAM189A1	-1.84655	4.98083	-3.92011	0.000103755	0.000239245	0.41131	Down
HIF3A	-1.67622	8.47659	-3.92493	0.000101772	0.000234965	0.429455	Down
P3H2	-1.18492	9.43824	-3.9265	0.000101137	0.000233701	0.435347	Down
TPSAB1	-1.2852	9.59096	-3.92664	0.000101082	0.000233602	0.435863	Down
SERPINB11	-1.50976	1.2322	-3.92683	0.000101001	0.000233445	0.436612	Down
GRIK5	-1.42038	6.9465	-3.92814	0.000100475	0.000232286	0.441527	Down
MYLK	-1.41998	13.2584	-3.92883	0.000100195	0.000231754	0.44415	Down
MRGPRF	-1.37037	9.58625	-3.92933	9.99976e-05	0.000231355	0.446007	Down
CLCA1	-2.80288	4.62809	-3.93119	9.9255e-05	0.00022975	0.453021	Down
S100G	-1.36741	2.77345	-3.93268	9.86612e-05	0.000228433	0.458666	Down
CLEC10A	-1.27879	7.24241	-3.93431	9.802e-05	0.000227117	0.464802	Down
LCE3E	-1.19046	0.634712	-3.9358	9.74378e-05	0.000225853	0.470407	Down
FBLN1	-1.38053	12.7568	-3.93912	9.61471e-05	0.000223194	0.482956	Down
IRX3	-1.56247	6.72161	-3.94311	9.46192e-05	0.000219839	0.498033	Down
BEX2	-1.85475	5.90227	-3.94499	9.39052e-05	0.000218316	0.505162	Down
PRUNE2	-1.75604	10.7429	-3.94739	9.3004e-05	0.000216356	0.514239	Down
DSCAML1	-1.53177	5.04654	-3.95658	8.96271e-05	0.000208995	0.549057	Down
RNF150	-1.43914	9.10992	-3.95677	8.95579e-05	0.00020886	0.549784	Down
AR	-1.32525	7.29516	-3.9638	8.70556e-05	0.000203534	0.576468	Down
SLC51B	-1.37784	5.81813	-3.97338	8.37524e-05	0.00019655	0.612898	Down
MYOM1	-1.29437	8.09216	-3.98147	8.10551e-05	0.000190749	0.643736	Down
CRHBP	-1.07066	4.17384	-3.9848	7.99673e-05	0.00018826	0.656465	Down
SHISA3	-1.83358	6.45713	-3.99073	7.80686e-05	0.000184115	0.679107	Down
SCTR	-1.75379	5.70566	-3.99147	7.78318e-05	0.000183627	0.68197	Down
CNTN2	-1.45252	4.61606	-3.99456	7.68643e-05	0.000181515	0.693757	Down
FLRT1	-1.16605	5.38655	-3.9966	7.62282e-05	0.000180208	0.701589	Down
RAI2	-1.0905	9.74403	-3.99747	7.59602e-05	0.000179642	0.704908	Down
IGSF10	-1.48279	6.60224	-3.99862	7.56045e-05	0.000178961	0.709332	Down
TAC1	-2.07006	3.15837	-3.99882	7.55456e-05	0.000178844	0.710066	Down
SPEG	-1.65519	9.33768	-3.9995	7.53363e-05	0.000178371	0.712681	Down
FGFBP2	-1.04579	4.3829	-4.00205	7.45589e-05	0.000176643	0.722458	Down
ADAMTSL3	-1.33482	8.13032	-4.00235	7.44663e-05	0.000176446	0.72363	Down
KCNJ15	-1.44901	7.97354	-4.00487	7.37079e-05	0.000174782	0.733278	Down
WDR49	-1.25661	2.904	-4.00815	7.27303e-05	0.000172596	0.745864	Down
ASIC5	-1.11617	1.14628	-4.00954	7.232e-05	0.000171753	0.751199	Down
PRDM8	-1.1353	7.86479	-4.00978	7.22483e-05	0.000171605	0.752133	Down
ST8SIA3	-1.52134	2.62736	-4.01207	7.15781e-05	0.000170165	0.76092	Down
CTNNA3	-1.99832	5.53376	-4.02115	6.89742e-05	0.000164372	0.795861	Down
NTRK3	-1.48193	5.68107	-4.02142	6.8899e-05	0.000164235	0.796889	Down
BTNL2	-1.04546	1.53277	-4.02163	6.88404e-05	0.000164138	0.797691	Down
THRSP	-1.19449	2.48461	-4.02181	6.87881e-05	0.000164034	0.798407	Down
FOSB	-1.51447	11.0857	-4.02364	6.82768e-05	0.000163002	0.805444	Down
ATP13A5	-1.33607	2.43113	-4.03219	6.5931e-05	0.000157867	0.838418	Down
GPR27	-1.68544	5.96296	-4.03722	6.45862e-05	0.000154826	0.857858	Down
HPGDS	-1.10457	6.08282	-4.03868	6.42024e-05	0.000153945	0.86348	Down
CNKSR2	-1.74041	5.30313	-4.0399	6.38805e-05	0.000153233	0.868222	Down
C1QTNF4	-1.21585	4.60147	-4.04182	6.33808e-05	0.000152112	0.875631	Down
SHISA6	-1.6383	5.99905	-4.04287	6.31077e-05	0.000151496	0.879705	Down
MUC21	-2.48431	2.92882	-4.04597	6.23118e-05	0.000149759	0.89168	Down
EDN2	-1.58982	4.70801	-4.05111	6.10095e-05	0.000146847	0.911611	Down
ANK2	-1.41369	9.13093	-4.05166	6.08711e-05	0.000146542	0.913753	Down
KCNA1	-2.10811	3.26224	-4.05342	6.04336e-05	0.00014562	0.920561	Down
XPNPEP2	-2.00865	7.65726	-4.05389	6.03161e-05	0.000145375	0.922397	Down
ACTN2	-1.83504	4.96222	-4.0549	6.00655e-05	0.000144827	0.926327	Down
CLU	-1.40843	13.5489	-4.05499	6.00454e-05	0.000144797	0.926642	Down
TCEAL7	-1.05905	6.29824	-4.05511	6.00141e-05	0.00014474	0.927134	Down
WDR17	-1.55372	5.44668	-4.07195	5.59932e-05	0.000135816	0.992596	Down
LIFR	-1.26903	9.83736	-4.07263	5.58368e-05	0.000135454	0.995238	Down
DEFA6	-2.6742	2.87262	-4.07499	5.5294e-05	0.000134242	1.00446	Down
ITM2A	-1.05279	9.70703	-4.0818	5.37603e-05	0.000130859	1.03102	Down
TPM2	-1.30524	13.1241	-4.08419	5.32324e-05	0.000129608	1.04034	Down
NME5	-1.18178	5.06651	-4.08463	5.31352e-05	0.000129406	1.04207	Down
OGN	-2.06783	9.13532	-4.0863	5.27695e-05	0.000128565	1.04859	Down
SCN4B	-1.19139	7.36496	-4.08662	5.26998e-05	0.000128446	1.04984	Down
ITIH5	-1.22816	10.3056	-4.08793	5.2415e-05	0.000127869	1.05496	Down
WNT6	-1.23145	4.77948	-4.09055	5.18482e-05	0.000126602	1.06522	Down
DPP10	-1.94998	3.30865	-4.09146	5.16534e-05	0.000126207	1.06878	Down
SLC16A7	-1.16513	9.2314	-4.09486	5.09318e-05	0.000124511	1.08207	Down
ENPP7	-1.81264	3.71628	-4.09497	5.09075e-05	0.000124484	1.08252	Down
MEI4	-1.44919	2.59566	-4.1016	4.95272e-05	0.000121428	1.10849	Down
CTNNA2	-1.77607	3.4358	-4.10218	4.9407e-05	0.000121149	1.11078	Down
TMEM196	-1.15413	1.30629	-4.1113	4.75701e-05	0.000116937	1.14658	Down
FAM189A2	-1.53248	7.95712	-4.11471	4.69003e-05	0.000115351	1.15998	Down
REEP2	-1.36349	7.1852	-4.11716	4.64246e-05	0.000114257	1.16962	Down
RAB9B	-1.30873	6.58032	-4.11901	4.60675e-05	0.000113408	1.17692	Down
AKAP6	-1.40966	8.21343	-4.12218	4.5464e-05	0.000112025	1.18938	Down
ST8SIA6	-1.28555	4.404	-4.12459	4.50096e-05	0.00011095	1.19887	Down
MLIP	-1.22567	3.68669	-4.126	4.47454e-05	0.000110357	1.20444	Down
NNAT	-1.21474	6.97207	-4.12628	4.46936e-05	0.000110247	1.20553	Down
NACAD	-1.22202	7.29304	-4.12687	4.45827e-05	0.000110014	1.20788	Down
THSD4	-1.12398	10.1488	-4.12799	4.43759e-05	0.000109576	1.21228	Down
CYP1A1	-1.84204	2.6857	-4.1341	4.3258e-05	0.000106972	1.2364	Down
LANCL3	-1.17157	6.13055	-4.13924	4.23386e-05	0.000104879	1.25671	Down
GRID2	-1.59024	3.19893	-4.14181	4.18847e-05	0.000103837	1.2669	Down
CES1	-1.83262	8.30761	-4.14452	4.14126e-05	0.000102722	1.27762	Down
KCNMA1	-1.76906	10.163	-4.14609	4.11414e-05	0.000102103	1.28384	Down
DMD	-1.33827	10.0448	-4.15365	3.9859e-05	9.90959e-05	1.31379	Down
STMN4	-1.27401	1.95119	-4.15656	3.93745e-05	9.80183e-05	1.32535	Down
HEPACAM	-1.32744	2.36019	-4.15931	3.89235e-05	9.69473e-05	1.33625	Down
GRIA3	-1.09441	4.65996	-4.16389	3.8181e-05	9.52251e-05	1.35447	Down
DLG2	-1.20737	6.79903	-4.16749	3.76071e-05	9.39068e-05	1.3688	Down
ZNF662	-1.28261	6.74972	-4.17056	3.71244e-05	9.27638e-05	1.38102	Down
SPATA4	-1.208	1.93627	-4.17185	3.69243e-05	9.23627e-05	1.38614	Down
FOXF1	-1.13338	10.546	-4.17431	3.65432e-05	9.14831e-05	1.39596	Down
DAAM2	-1.18032	9.99663	-4.17866	3.58798e-05	8.99189e-05	1.41329	Down
NPR1	-1.00831	8.62615	-4.17962	3.57348e-05	8.95917e-05	1.41713	Down
CHGB	-2.23327	6.01214	-4.18059	3.55881e-05	8.92599e-05	1.42102	Down
ZNF626	-1.09788	7.30537	-4.18109	3.55137e-05	8.90973e-05	1.423	Down
RBM24	-1.45207	5.83102	-4.1851	3.49175e-05	8.76959e-05	1.43902	Down
GALNT15	-1.295	7.57767	-4.18519	3.49042e-05	8.76744e-05	1.43938	Down
MYOZ2	-1.31756	2.59604	-4.18561	3.48423e-05	8.75661e-05	1.44106	Down
PEG3	-1.41301	7.01251	-4.19408	3.36187e-05	8.47078e-05	1.4749	Down
PLIN5	-1.2258	5.80235	-4.19555	3.34097e-05	8.42495e-05	1.48081	Down
ATP2B2	-1.37791	3.64437	-4.19738	3.31528e-05	8.36471e-05	1.48811	Down
RYR3	-1.27847	6.78818	-4.20151	3.25782e-05	8.23086e-05	1.50467	Down
CAMK2B	-1.34222	5.00925	-4.20424	3.2203e-05	8.14159e-05	1.51564	Down
LVRN	-1.34801	4.0543	-4.20608	3.19527e-05	8.0816e-05	1.52303	Down
ABCC8	-1.65688	4.57336	-4.2063	3.19237e-05	8.07536e-05	1.52389	Down
RGN	-1.5895	6.92126	-4.20765	3.17415e-05	8.03143e-05	1.52931	Down
GLP2R	-1.62557	5.95281	-4.21124	3.12611e-05	7.91997e-05	1.54375	Down
SELENOP	-1.21148	11.7028	-4.21176	3.11931e-05	7.90619e-05	1.54581	Down
ZNF471	-1.19933	6.77589	-4.21201	3.11591e-05	7.90017e-05	1.54684	Down
ANGPTL5	-1.26442	2.21295	-4.21267	3.10723e-05	7.88353e-05	1.54948	Down
CYP3A4	-2.23407	5.30118	-4.21511	3.07529e-05	7.80779e-05	1.55927	Down
SEPTIN5	-1.05184	8.71397	-4.2168	3.05322e-05	7.75492e-05	1.56609	Down
RBFOX3	-1.88558	4.94931	-4.22607	2.93524e-05	7.4828e-05	1.60342	Down
TXLNB	-1.20434	5.94996	-4.22686	2.92546e-05	7.4599e-05	1.60658	Down
ATP6V1G2	-1.04275	4.81914	-4.2363	2.81013e-05	7.17661e-05	1.64469	Down
F13A1	-1.58333	9.39068	-4.24123	2.7516e-05	7.03195e-05	1.66464	Down
PRKAA2	-2.03022	7.51492	-4.2413	2.75081e-05	7.03089e-05	1.66491	Down
C6orf58	-2.59815	5.65732	-4.24352	2.72492e-05	6.96853e-05	1.67387	Down
OTOP2	-1.41217	2.06908	-4.24638	2.69175e-05	6.88843e-05	1.68548	Down
EPHA7	-2.07382	7.03133	-4.25326	2.61383e-05	6.70283e-05	1.71332	Down
LONRF2	-1.88181	7.48741	-4.25497	2.59468e-05	6.65832e-05	1.72029	Down
MYMX	-1.21361	4.14428	-4.25751	2.56667e-05	6.59098e-05	1.73057	Down
TSPAN7	-1.24536	9.04736	-4.25889	2.5516e-05	6.55587e-05	1.73616	Down
SLC16A9	-1.66471	6.845	-4.25963	2.54346e-05	6.53767e-05	1.73919	Down
PRPH	-1.6961	4.19784	-4.2611	2.52753e-05	6.49853e-05	1.74514	Down
PTX3	-1.19985	5.45105	-4.26275	2.50973e-05	6.45632e-05	1.75184	Down
SCGB2A1	-2.21395	4.01189	-4.26421	2.49407e-05	6.42312e-05	1.75778	Down
SLC9A4	-2.58111	6.45989	-4.26487	2.48698e-05	6.40663e-05	1.76048	Down
APOB	-2.99959	7.02866	-4.26668	2.46774e-05	6.35971e-05	1.76784	Down
DCN	-1.13437	13.9636	-4.26732	2.46098e-05	6.34317e-05	1.77044	Down
CCDC160	-1.41023	3.29724	-4.26912	2.44207e-05	6.29704e-05	1.77775	Down
HACD1	-1.30718	7.15546	-4.27752	2.35555e-05	6.08993e-05	1.81196	Down
MTTP	-2.57929	6.42889	-4.28522	2.27886e-05	5.9097e-05	1.84335	Down
GRIN2A	-1.83266	6.70394	-4.28677	2.26368e-05	5.87391e-05	1.84969	Down
CHST9	-2.21359	4.10214	-4.28921	2.24004e-05	5.82035e-05	1.85965	Down
ACACB	-1.02779	10.6116	-4.29602	2.1752e-05	5.66215e-05	1.88751	Down
RBP2	-2.61334	5.56512	-4.29604	2.175e-05	5.66215e-05	1.8876	Down
FOXP2	-1.73958	8.15904	-4.29685	2.16748e-05	5.64441e-05	1.89088	Down
CIDEC	-2.06866	6.59414	-4.30204	2.11942e-05	5.52774e-05	1.91216	Down
UCN3	-1.98493	3.08537	-4.30283	2.1122e-05	5.51045e-05	1.9154	Down
CNGA3	-1.56129	3.89684	-4.30389	2.10258e-05	5.48766e-05	1.91973	Down
SUSD4	-1.65987	7.47922	-4.30704	2.07414e-05	5.4195e-05	1.93265	Down
SLC2A7	-1.22144	1.7663	-4.31046	2.04375e-05	5.3446e-05	1.94665	Down
C14orf132	-1.31464	9.42217	-4.31102	2.03875e-05	5.33303e-05	1.94898	Down
SIGLEC11	-1.20425	4.85598	-4.31304	2.02108e-05	5.29272e-05	1.95724	Down
TMPRSS15	-2.71786	3.88716	-4.31563	1.99855e-05	5.23887e-05	1.96788	Down
MT1E	-1.29897	11.0928	-4.31644	1.99152e-05	5.22193e-05	1.97122	Down
PGR	-1.41174	6.96848	-4.3193	1.96698e-05	5.16486e-05	1.98299	Down
TENM2	-1.74484	6.25773	-4.32154	1.94797e-05	5.12071e-05	1.99221	Down
CCDC178	-1.2823	3.53465	-4.33093	1.87021e-05	4.9302e-05	2.03088	Down
CYP11A1	-1.4325	4.36847	-4.333	1.85349e-05	4.88887e-05	2.03941	Down
LEXM	-1.27516	3.8904	-4.33436	1.84259e-05	4.86357e-05	2.04501	Down
ZBTB7C	-1.71238	9.62014	-4.33972	1.80011e-05	4.76425e-05	2.06715	Down
PITPNM3	-1.34837	9.69027	-4.34253	1.77824e-05	4.70906e-05	2.07876	Down
KLF2	-1.036	12.1064	-4.34303	1.77437e-05	4.70014e-05	2.08083	Down
ZNF385B	-1.5218	6.16503	-4.34666	1.7466e-05	4.63185e-05	2.0958	Down
TNNT3	-1.44906	3.21432	-4.35529	1.68214e-05	4.47045e-05	2.13152	Down
GRIA2	-1.73866	2.66199	-4.35575	1.67875e-05	4.46334e-05	2.13343	Down
KY	-1.36832	5.08317	-4.35593	1.67745e-05	4.46116e-05	2.13417	Down
KPRP	-1.66745	1.01909	-4.35661	1.67242e-05	4.4484e-05	2.13703	Down
G6PC1	-1.68417	2.19017	-4.36185	1.63466e-05	4.35357e-05	2.15871	Down
CYP4F22	-1.33014	4.55752	-4.36228	1.63158e-05	4.34661e-05	2.16051	Down
RANBP3L	-1.36927	4.01541	-4.37175	1.56536e-05	4.18095e-05	2.19987	Down
LCN10	-1.48367	2.70075	-4.37716	1.52873e-05	4.08896e-05	2.22237	Down
KCNK16	-1.52717	1.42672	-4.3794	1.51379e-05	4.05133e-05	2.2317	Down
PIANP	-1.30828	5.62522	-4.37964	1.51223e-05	4.04774e-05	2.23268	Down
CHRM2	-2.65768	5.67352	-4.3837	1.48555e-05	3.98147e-05	2.24959	Down
RSPO1	-1.69706	4.94235	-4.38441	1.48094e-05	3.96968e-05	2.25255	Down
AKR1B10	-2.6899	10.683	-4.38513	1.47624e-05	3.95822e-05	2.25557	Down
CDO1	-1.56517	5.63792	-4.39071	1.44053e-05	3.86859e-05	2.27884	Down
ARHGEF25	-1.28193	8.73547	-4.3914	1.43616e-05	3.85909e-05	2.28173	Down
ADAM33	-1.72798	8.04883	-4.39469	1.41557e-05	3.8087e-05	2.29545	Down
COL23A1	-1.065	6.76483	-4.3971	1.40064e-05	3.77398e-05	2.30553	Down
PTPRZ1	-1.99896	7.39214	-4.40647	1.34406e-05	3.63412e-05	2.34473	Down
KCNJ16	-2.11457	4.83563	-4.4199	1.26678e-05	3.44466e-05	2.40103	Down
LPAR1	-1.08049	9.57301	-4.42068	1.26245e-05	3.43464e-05	2.40429	Down
NXPH3	-1.71988	6.82525	-4.43358	1.19246e-05	3.26063e-05	2.45854	Down
SDR9C7	-1.51025	1.41438	-4.43421	1.18914e-05	3.25298e-05	2.46119	Down
APOC3	-2.84372	3.60527	-4.43782	1.17027e-05	3.20592e-05	2.47641	Down
AOC3	-1.43183	10.9434	-4.44384	1.13945e-05	3.12716e-05	2.5018	Down
ADCY5	-1.80869	9.35965	-4.44778	1.11968e-05	3.07517e-05	2.51845	Down
PPP1R3G	-1.18563	6.60272	-4.44891	1.11411e-05	3.0612e-05	2.5232	Down
CCL14	-1.39825	5.68557	-4.45023	1.1076e-05	3.04556e-05	2.52877	Down
MLNR	-1.8322	2.90773	-4.45447	1.08692e-05	2.99269e-05	2.5467	Down
AMPD1	-1.76111	4.58873	-4.45709	1.07434e-05	2.96041e-05	2.55778	Down
CXCL12	-1.23107	10.8795	-4.46046	1.05835e-05	2.92093e-05	2.57205	Down
INMT-MINDY4	-1.28913	1.72469	-4.46759	1.02528e-05	2.83638e-05	2.60226	Down
TACR2	-2.18089	7.76541	-4.47341	9.99022e-06	2.77072e-05	2.62696	Down
PAK5	-1.80435	2.9381	-4.47504	9.91769e-06	2.75183e-05	2.63389	Down
LDOC1	-1.20313	8.92552	-4.47588	9.88089e-06	2.74203e-05	2.63743	Down
SCG3	-2.04906	4.94571	-4.47666	9.84663e-06	2.73496e-05	2.64074	Down
GDF10	-1.91057	4.25811	-4.47843	9.76888e-06	2.71418e-05	2.64829	Down
CHL1	-1.46291	8.10161	-4.48661	9.4184e-06	2.62384e-05	2.68307	Down
TMEM220	-1.01038	8.32493	-4.4887	9.33071e-06	2.60058e-05	2.69198	Down
LYNX1	-1.76527	8.95362	-4.48965	9.29119e-06	2.59072e-05	2.69602	Down
FLG	-1.87847	4.53491	-4.49005	9.27472e-06	2.5869e-05	2.69771	Down
PDZRN3	-1.33577	10.1984	-4.49334	9.13933e-06	2.55105e-05	2.71171	Down
FOXF2	-1.25674	9.72216	-4.49706	8.98819e-06	2.513e-05	2.72759	Down
DKK4	-2.07223	3.76184	-4.49958	8.88745e-06	2.4867e-05	2.73832	Down
ZSCAN18	-1.26319	8.86488	-4.50418	8.70599e-06	2.44032e-05	2.75797	Down
REEP1	-1.66045	8.09927	-4.50519	8.66634e-06	2.42957e-05	2.76232	Down
TMEM63C	-1.65624	5.71948	-4.51581	8.26304e-06	2.3242e-05	2.80771	Down
WFIKKN2	-1.44732	2.78484	-4.52104	8.07085e-06	2.27323e-05	2.83013	Down
ANKS1B	-1.52045	5.49285	-4.52189	8.04021e-06	2.26528e-05	2.83375	Down
SLC25A34	-1.17848	6.57872	-4.52569	7.9037e-06	2.23087e-05	2.85007	Down
PDE1C	-1.23251	7.74738	-4.5257	7.90352e-06	2.23087e-05	2.85009	Down
GNAO1	-1.76252	8.98402	-4.52742	7.84251e-06	2.21527e-05	2.85747	Down
RASGEF1C	-1.52977	3.84881	-4.52797	7.8231e-06	2.21046e-05	2.85983	Down
NUDT10	-1.56678	4.10036	-4.52799	7.82219e-06	2.21046e-05	2.85994	Down
TENT5B	-1.64315	7.84802	-4.52876	7.79517e-06	2.2039e-05	2.86324	Down
DCAF12L2	-1.51727	2.46882	-4.53021	7.74451e-06	2.19158e-05	2.86945	Down
TMEM59L	-1.60072	5.09897	-4.531	7.71676e-06	2.18439e-05	2.87287	Down
PNOC	-1.60253	5.34325	-4.53289	7.65135e-06	2.16817e-05	2.88098	Down
RIMS4	-2.25703	4.00994	-4.55615	6.88812e-06	1.96534e-05	2.98114	Down
NECAB1	-1.49203	6.6018	-4.56034	6.75859e-06	1.93045e-05	2.99923	Down
SORBS2	-1.32557	10.6819	-4.5634	6.66556e-06	1.90563e-05	3.01245	Down
NIPAL4	-1.84088	5.61005	-4.5643	6.63831e-06	1.89929e-05	3.01635	Down
LRAT	-2.04027	4.63529	-4.56884	6.50302e-06	1.86202e-05	3.03599	Down
SULT2A1	-2.54902	3.65036	-4.57665	6.27643e-06	1.80129e-05	3.0698	Down
ALDH3A1	-2.11259	10.1106	-4.57718	6.26139e-06	1.7978e-05	3.07209	Down
CLDN17	-1.19683	0.472429	-4.57927	6.20221e-06	1.78108e-05	3.08115	Down
RGMA	-1.90834	10.2054	-4.58429	6.06209e-06	1.74366e-05	3.10294	Down
TACR1	-1.60492	5.39878	-4.59191	5.85554e-06	1.68934e-05	3.136	Down
NPY5R	-1.31081	1.77065	-4.59196	5.85403e-06	1.68916e-05	3.13625	Down
STUM	-2.01507	6.57928	-4.5943	5.79191e-06	1.6715e-05	3.14643	Down
NKAPL	-1.20187	4.07038	-4.59869	5.67732e-06	1.64122e-05	3.16549	Down
KCNMB2	-1.32494	3.61484	-4.60551	5.50327e-06	1.59536e-05	3.19519	Down
KCNQ5	-1.48626	5.08546	-4.60601	5.49065e-06	1.59195e-05	3.19739	Down
F10	-1.61835	7.60894	-4.60721	5.4607e-06	1.58425e-05	3.2026	Down
HOMER2	-1.63062	8.81085	-4.60811	5.4383e-06	1.57824e-05	3.20653	Down
APOA4	-3.5657	4.452	-4.61364	5.30232e-06	1.5407e-05	3.23069	Down
REP15	-1.65758	4.62382	-4.61704	5.22046e-06	1.5181e-05	3.24553	Down
FGL2	-1.42837	11.1973	-4.62123	5.12131e-06	1.49136e-05	3.26383	Down
PCDH19	-1.50296	6.00512	-4.62347	5.06905e-06	1.47706e-05	3.27362	Down
ATP1B2	-1.32757	7.40146	-4.626	5.01059e-06	1.46185e-05	3.28469	Down
DUSP5	-1.09278	10.2064	-4.62806	4.96354e-06	1.44994e-05	3.29369	Down
NDN	-1.1631	9.46321	-4.62877	4.9473e-06	1.44624e-05	3.29682	Down
NMRK2	-1.45841	1.94473	-4.62953	4.93017e-06	1.44155e-05	3.30013	Down
PLA2G2C	-1.3496	2.44908	-4.63372	4.83634e-06	1.41522e-05	3.31847	Down
CSTA	-1.75768	7.99013	-4.64089	4.67959e-06	1.3728e-05	3.34992	Down
CHADL	-1.07771	6.99474	-4.64474	4.59739e-06	1.35145e-05	3.36684	Down
SBSPON	-1.52988	8.22817	-4.64663	4.55767e-06	1.34041e-05	3.37513	Down
CAVIN2	-1.37488	9.76192	-4.64681	4.55385e-06	1.33971e-05	3.37593	Down
TAGLN	-1.62368	13.6486	-4.64858	4.51696e-06	1.32968e-05	3.38369	Down
LDHD	-1.38453	8.87585	-4.6645	4.19738e-06	1.2413e-05	3.45376	Down
GDF7	-1.47484	5.98906	-4.66535	4.18084e-06	1.237e-05	3.45753	Down
LIPF	-4.70426	7.95433	-4.6661	4.1663e-06	1.23309e-05	3.46086	Down
PTGDR2	-1.31055	6.49499	-4.66666	4.15569e-06	1.23053e-05	3.46329	Down
SLC17A7	-1.34651	5.43715	-4.676	3.98014e-06	1.18269e-05	3.50451	Down
SORBS1	-1.6326	12.1898	-4.67723	3.95748e-06	1.17708e-05	3.50997	Down
FAM110D	-1.05964	6.6363	-4.68263	3.85978e-06	1.15096e-05	3.53385	Down
RNLS	-1.13667	6.52572	-4.68285	3.8558e-06	1.15014e-05	3.53483	Down
JPH2	-1.91031	8.89244	-4.68748	3.77411e-06	1.12812e-05	3.55529	Down
KLF9	-1.07881	11.6822	-4.68763	3.77145e-06	1.1275e-05	3.55596	Down
ITGA8	-1.4762	9.40473	-4.68767	3.7707e-06	1.12746e-05	3.55615	Down
MAOA	-1.27582	11.6206	-4.69171	3.70066e-06	1.10705e-05	3.57406	Down
CLEC3A	-1.6242	1.91838	-4.69356	3.66906e-06	1.09795e-05	3.58226	Down
NIBAN1	-1.43715	11.6273	-4.69451	3.65299e-06	1.09367e-05	3.58645	Down
CCL21	-2.08776	9.95002	-4.69541	3.63774e-06	1.08945e-05	3.59045	Down
CLCNKA	-1.65853	3.52858	-4.69739	3.6045e-06	1.08002e-05	3.59922	Down
MAB21L2	-1.83201	4.40478	-4.70072	3.5492e-06	1.06413e-05	3.61399	Down
S100A12	-1.80447	5.11029	-4.70101	3.5443e-06	1.06301e-05	3.61531	Down
MAS1L	-1.16804	1.25017	-4.70145	3.53712e-06	1.06119e-05	3.61725	Down
RGS9	-1.32175	6.38701	-4.70212	3.52618e-06	1.05808e-05	3.62021	Down
RBM20	-1.59317	4.99494	-4.70511	3.47748e-06	1.04397e-05	3.6335	Down
RNF112	-1.11438	4.72173	-4.70556	3.47014e-06	1.04227e-05	3.63552	Down
GREM2	-2.25389	7.5877	-4.70869	3.41999e-06	1.02854e-05	3.64943	Down
NOVA1	-1.68131	7.0767	-4.70885	3.41755e-06	1.02797e-05	3.65011	Down
KRT222	-1.48863	3.32071	-4.71638	3.29976e-06	9.96716e-06	3.68363	Down
EEF1A2	-2.51581	7.14866	-4.71803	3.27448e-06	9.89883e-06	3.69098	Down
CRTAC1	-2.01303	5.06561	-4.71974	3.24846e-06	9.82337e-06	3.69861	Down
SLC28A1	-1.76759	3.33238	-4.72262	3.20523e-06	9.70364e-06	3.71142	Down
PACRG	-1.48125	4.71958	-4.72796	3.12637e-06	9.47415e-06	3.73523	Down
ARHGEF26	-1.57388	8.69406	-4.72894	3.11204e-06	9.43838e-06	3.73962	Down
MASP1	-1.5944	6.31666	-4.72922	3.10803e-06	9.42775e-06	3.74085	Down
GPIHBP1	-1.37731	5.33717	-4.7318	3.07079e-06	9.32542e-06	3.75237	Down
ALDH1A2	-1.56606	5.82113	-4.73498	3.02551e-06	9.19841e-06	3.76658	Down
C1QTNF2	-1.18557	6.35611	-4.74233	2.92329e-06	8.90795e-06	3.79944	Down
SV2C	-1.5986	4.75427	-4.74602	2.87321e-06	8.77111e-06	3.81596	Down
MT3	-1.55068	2.3773	-4.7516	2.79911e-06	8.56456e-06	3.84095	Down
VIPR2	-1.87155	6.00619	-4.75462	2.75975e-06	8.44827e-06	3.85449	Down
CGNL1	-1.47163	9.20681	-4.75624	2.73886e-06	8.38984e-06	3.86176	Down
ENHO	-1.59915	4.28222	-4.76085	2.68019e-06	8.22363e-06	3.88247	Down
C22orf23	-1.0931	5.40767	-4.76212	2.66432e-06	8.17898e-06	3.88814	Down
B3GNT6	-2.82224	6.35013	-4.76255	2.65887e-06	8.16358e-06	3.8901	Down
PSAPL1	-2.92362	6.06397	-4.76616	2.61419e-06	8.03698e-06	3.90631	Down
MAP6	-1.47266	7.62512	-4.76687	2.60553e-06	8.01168e-06	3.90949	Down
HOXA4	-1.32618	7.11204	-4.76758	2.59684e-06	7.98892e-06	3.91268	Down
COL4A5	-1.71769	9.44126	-4.78088	2.43933e-06	7.53046e-06	3.97254	Down
RNASE1	-1.19762	13.0979	-4.78212	2.42513e-06	7.48785e-06	3.97813	Down
NDRG4	-1.14457	7.92146	-4.78617	2.37919e-06	7.35575e-06	3.99643	Down
TMEFF2	-1.73819	3.50951	-4.7883	2.35544e-06	7.28838e-06	4.00602	Down
MORN5	-2.31699	3.16134	-4.79037	2.33257e-06	7.22359e-06	4.01536	Down
PSCA	-3.34863	10.5073	-4.7908	2.32781e-06	7.21486e-06	4.01731	Down
ANKRD63	-1.4226	1.6115	-4.79186	2.31617e-06	7.17997e-06	4.02211	Down
SMIM10L2B	-1.24165	5.47485	-4.7978	2.25212e-06	6.99539e-06	4.04894	Down
GAMT	-1.4138	8.02158	-4.79808	2.24919e-06	6.9886e-06	4.05019	Down
CYBRD1	-1.32454	12.1796	-4.80168	2.21127e-06	6.87997e-06	4.06646	Down
SCN2B	-1.80474	4.45867	-4.8087	2.13905e-06	6.67205e-06	4.09824	Down
RBP7	-1.13389	6.47293	-4.80888	2.13715e-06	6.66937e-06	4.09909	Down
SLC27A6	-1.84146	3.59741	-4.81423	2.08373e-06	6.50702e-06	4.12332	Down
SHISA9	-1.96651	3.79563	-4.81447	2.08138e-06	6.50078e-06	4.1244	Down
ADAMTS1	-1.25185	11.2926	-4.81454	2.08067e-06	6.49966e-06	4.12473	Down
NSG1	-1.59213	7.41689	-4.82511	1.97894e-06	6.19535e-06	4.17272	Down
C1QTNF7	-1.78417	7.07052	-4.83091	1.92521e-06	6.03322e-06	4.19907	Down
MAPK10	-1.41396	7.77289	-4.83487	1.88931e-06	5.93269e-06	4.21709	Down
SLC9A9	-1.13057	8.32572	-4.83887	1.85364e-06	5.82963e-06	4.23534	Down
HSPB7	-2.28047	9.14784	-4.84411	1.80805e-06	5.69769e-06	4.25918	Down
CNTN1	-2.26822	7.26021	-4.85083	1.75102e-06	5.53199e-06	4.28988	Down
CHAD	-1.4916	5.79283	-4.85206	1.7408e-06	5.50342e-06	4.29549	Down
HDC	-1.50832	6.11504	-4.85322	1.73119e-06	5.47675e-06	4.30079	Down
OSGIN1	-1.00006	8.52978	-4.85714	1.69913e-06	5.38174e-06	4.31869	Down
TPSG1	-1.78614	4.87739	-4.86167	1.66278e-06	5.27377e-06	4.3394	Down
SLC2A12	-1.59078	8.04781	-4.86443	1.64098e-06	5.20907e-06	4.35204	Down
BMP5	-1.98529	4.75996	-4.87141	1.58712e-06	5.04667e-06	4.38401	Down
PAIP2B	-1.47725	8.1411	-4.87499	1.56018e-06	4.96525e-06	4.40041	Down
ADGRB3	-1.83953	4.68404	-4.87748	1.54166e-06	4.908e-06	4.41185	Down
DACT3	-1.55724	9.00141	-4.87757	1.54103e-06	4.90682e-06	4.41225	Down
BEX4	-1.23891	9.05857	-4.87897	1.53075e-06	4.87574e-06	4.41866	Down
CSRP1	-1.16876	14.068	-4.8863	1.47787e-06	4.72102e-06	4.45234	Down
AADACL2	-1.47147	1.85573	-4.88759	1.46876e-06	4.69435e-06	4.45826	Down
KRT1	-2.05767	3.26179	-4.8893	1.45678e-06	4.66086e-06	4.46611	Down
CACNA2D3	-1.37339	5.83399	-4.9038	1.35874e-06	4.37343e-06	4.53288	Down
LRRN4CL	-1.38157	7.46774	-4.90597	1.34463e-06	4.33429e-06	4.54289	Down
NLGN1	-1.99838	5.55668	-4.91532	1.28542e-06	4.16115e-06	4.58605	Down
ALDOC	-1.05211	9.84975	-4.92096	1.25095e-06	4.05379e-06	4.61211	Down
AGTR1	-2.35794	5.26489	-4.9225	1.24168e-06	4.02445e-06	4.61924	Down
RIMS1	-2.21484	5.2823	-4.92826	1.20766e-06	3.92374e-06	4.64587	Down
ARHGDIG	-2.26474	5.27501	-4.93133	1.18989e-06	3.87071e-06	4.66009	Down
GADD45B	-1.01877	10.7709	-4.93135	1.18976e-06	3.87071e-06	4.66019	Down
PIRT	-1.84836	3.49878	-4.93263	1.18242e-06	3.84979e-06	4.66612	Down
ACOX2	-1.40401	8.13542	-4.94508	1.1133e-06	3.6368e-06	4.72389	Down
TREH	-1.64726	5.95262	-4.94634	1.10655e-06	3.61603e-06	4.72971	Down
SOX21	-3.1626	6.20063	-4.95302	1.0713e-06	3.50821e-06	4.76076	Down
SYNGR1	-1.55454	8.82341	-4.95919	1.03971e-06	3.41315e-06	4.78947	Down
BHMT2	-1.58682	6.55078	-4.95929	1.03917e-06	3.41199e-06	4.78997	Down
CKM	-1.54654	4.14524	-4.96254	1.02293e-06	3.36161e-06	4.80508	Down
SMIM10L2A	-1.51316	5.9067	-4.97067	9.83296e-07	3.23994e-06	4.84298	Down
RIC3	-1.89438	6.04627	-4.97177	9.78061e-07	3.22497e-06	4.8481	Down
ETNPPL	-2.03937	2.71423	-4.97379	9.68481e-07	3.19678e-06	4.85755	Down
ANKRD65	-1.42334	7.64336	-4.97414	9.66824e-07	3.19244e-06	4.85919	Down
FXYD6	-1.46433	9.5945	-4.97495	9.63026e-07	3.18159e-06	4.86296	Down
HS3ST6	-1.99598	2.59453	-4.97827	9.4759e-07	3.13504e-06	4.87847	Down
GPAT3	-1.23614	8.61164	-4.98126	9.33905e-07	3.09195e-06	4.89242	Down
SFRP5	-2.50729	5.78729	-4.98262	9.2772e-07	3.07202e-06	4.8988	Down
EPHA6	-2.0519	3.3394	-4.98491	9.17432e-07	3.0439e-06	4.9095	Down
FRRS1L	-2.49473	5.59252	-4.99888	8.56935e-07	2.85793e-06	4.97496	Down
TMEM25	-1.28132	9.14476	-5.00197	8.44123e-07	2.82025e-06	4.98941	Down
PRKAR2B	-1.36897	9.28934	-5.00716	8.22945e-07	2.75443e-06	5.0138	Down
NXPE4	-1.70535	2.18967	-5.00728	8.2247e-07	2.75333e-06	5.01435	Down
NPTX1	-2.58786	6.23795	-5.01222	8.0281e-07	2.69139e-06	5.03757	Down
BAALC	-1.32884	5.36003	-5.02209	7.64922e-07	2.57874e-06	5.08398	Down
AARD	-1.7915	4.49458	-5.02229	7.6415e-07	2.5766e-06	5.08495	Down
KRT2	-1.69013	2.48555	-5.02416	7.57194e-07	2.55639e-06	5.09373	Down
IRX6	-1.84582	2.16799	-5.03035	7.34524e-07	2.48615e-06	5.12291	Down
MYOCD	-1.98133	8.82933	-5.03097	7.32277e-07	2.479e-06	5.12585	Down
RELN	-1.98743	6.51661	-5.03148	7.30477e-07	2.47335e-06	5.12821	Down
KCNB2	-1.70397	2.63762	-5.04138	6.95771e-07	2.36271e-06	5.17495	Down
PHOX2A	-1.86616	2.07577	-5.04359	6.88223e-07	2.33878e-06	5.18542	Down
MAF	-1.01221	11.3747	-5.04402	6.86768e-07	2.33426e-06	5.18746	Down
FLG2	-1.39057	1.54382	-5.05921	6.37235e-07	2.17662e-06	5.25935	Down
SYNPO2	-2.37719	12.2017	-5.07513	5.89055e-07	2.02205e-06	5.33486	Down
MYL3	-1.60375	3.06215	-5.08683	5.5588e-07	1.91699e-06	5.39055	Down
PHOX2B	-1.86738	1.81421	-5.09176	5.42464e-07	1.87385e-06	5.41402	Down
SORCS3	-1.8963	2.77294	-5.09235	5.40877e-07	1.8694e-06	5.41684	Down
GYPC	-1.18185	10.0962	-5.09544	5.32642e-07	1.84265e-06	5.43158	Down
CPE	-1.50129	10.2941	-5.10521	5.07423e-07	1.7626e-06	5.47819	Down
VIP	-2.69527	5.09463	-5.10714	5.02583e-07	1.74677e-06	5.4874	Down
GALR1	-1.70305	2.4071	-5.11113	4.92702e-07	1.7137e-06	5.50648	Down
PSD	-1.77935	8.53959	-5.11221	4.9005e-07	1.70575e-06	5.51167	Down
MAOB	-1.81238	10.0108	-5.1221	4.66501e-07	1.62956e-06	5.559	Down
ADRA1A	-1.4683	3.97048	-5.12573	4.5814e-07	1.60196e-06	5.57638	Down
ENTPD3	-1.92563	7.11974	-5.12642	4.56568e-07	1.59719e-06	5.57969	Down
SLC5A5	-2.91748	6.42252	-5.13125	4.45688e-07	1.56301e-06	5.60287	Down
PDILT	-2.2248	2.24979	-5.13377	4.40129e-07	1.54482e-06	5.61494	Down
ZDHHC22	-1.54089	1.68276	-5.14079	4.24962e-07	1.49567e-06	5.64865	Down
SSBP2	-1.22169	9.49575	-5.14422	4.17731e-07	1.47245e-06	5.66515	Down
GGTA1	-1.22048	7.82883	-5.14559	4.14869e-07	1.46263e-06	5.67176	Down
RADIL	-1.47871	5.99186	-5.14756	4.10801e-07	1.44966e-06	5.68124	Down
SYT4	-2.3928	3.06695	-5.15163	4.02531e-07	1.42344e-06	5.70079	Down
CPEB1	-1.60838	5.44913	-5.15192	4.01947e-07	1.42192e-06	5.70218	Down
DGKG	-1.53063	7.74699	-5.15403	3.97715e-07	1.40801e-06	5.71236	Down
LIMS2	-1.49991	10.4191	-5.15954	3.86887e-07	1.37203e-06	5.73891	Down
ARHGEF37	-1.12226	9.76184	-5.16231	3.81542e-07	1.35488e-06	5.75228	Down
SLC7A8	-1.17023	11.2799	-5.16877	3.6938e-07	1.31369e-06	5.78344	Down
CARTPT	-2.93728	3.28718	-5.17469	3.58542e-07	1.27831e-06	5.81208	Down
PDE2A	-1.32265	8.73165	-5.17569	3.5676e-07	1.27293e-06	5.81687	Down
NPY2R	-1.38983	0.99258	-5.17712	3.54203e-07	1.26478e-06	5.82379	Down
C8orf88	-1.87054	5.37657	-5.18331	3.43346e-07	1.22907e-06	5.85374	Down
KIT	-1.57303	9.23971	-5.19588	3.2228e-07	1.16012e-06	5.91465	Down
FOXD3	-2.10491	3.8321	-5.198	3.18838e-07	1.14973e-06	5.92498	Down
HSPA2	-1.35137	9.56348	-5.22054	2.84529e-07	1.0328e-06	6.03452	Down
SEZ6L	-1.91554	4.46977	-5.22404	2.79523e-07	1.01554e-06	6.0516	Down
CPA2	-3.12677	4.43286	-5.22994	2.71286e-07	9.87808e-07	6.08039	Down
GUCA2B	-2.40838	3.12235	-5.23882	2.59347e-07	9.47113e-07	6.12371	Down
GHRL	-1.93112	6.43914	-5.23907	2.59011e-07	9.46069e-07	6.12496	Down
ABI3BP	-1.97034	10.3793	-5.24142	2.55947e-07	9.35428e-07	6.13641	Down
NR0B1	-1.1519	0.985103	-5.247	2.48788e-07	9.12303e-07	6.16372	Down
MS4A10	-2.31349	2.93647	-5.24748	2.48176e-07	9.10418e-07	6.16609	Down
ASB5	-3.20284	4.13786	-5.25381	2.40313e-07	8.84008e-07	6.19708	Down
C7	-2.82915	9.66249	-5.25523	2.38583e-07	8.78513e-07	6.20404	Down
ANKRD53	-1.15629	5.56609	-5.25913	2.33899e-07	8.62287e-07	6.22313	Down
IP6K3	-1.70038	3.95356	-5.26448	2.27609e-07	8.40593e-07	6.24938	Down
DNAJB5	-1.4608	9.42911	-5.26487	2.27154e-07	8.39079e-07	6.2513	Down
ENAM	-1.87741	5.04722	-5.27732	2.13173e-07	7.90568e-07	6.31247	Down
NAALADL1	-1.37188	7.74951	-5.28936	2.00457e-07	7.48156e-07	6.3717	Down
MFAP4	-1.78633	12.3246	-5.28955	2.00255e-07	7.47569e-07	6.37267	Down
MYRIP	-1.84243	7.14491	-5.29338	1.96376e-07	7.33677e-07	6.39151	Down
DEFA5	-3.64522	2.93708	-5.31776	1.73292e-07	6.53455e-07	6.51197	Down
HS6ST3	-2.38501	4.64186	-5.31811	1.72979e-07	6.52406e-07	6.51371	Down
NPAS4	-1.78223	3.3243	-5.31905	1.72143e-07	6.49516e-07	6.51838	Down
TNFAIP8L3	-1.41869	7.10297	-5.31981	1.71477e-07	6.47264e-07	6.52212	Down
GPR155	-1.33741	9.93202	-5.32287	1.68802e-07	6.37684e-07	6.53726	Down
RCAN2	-1.43327	10.0683	-5.3322	1.6089e-07	6.09896e-07	6.58352	Down
CPNE6	-2.1178	4.42563	-5.33299	1.6023e-07	6.07519e-07	6.58748	Down
CBX7	-1.12891	10.5072	-5.33351	1.59804e-07	6.06025e-07	6.59005	Down
GCG	-2.62332	2.11741	-5.33528	1.58351e-07	6.0125e-07	6.59884	Down
TCEAL5	-1.84915	2.66747	-5.336	1.57768e-07	5.99404e-07	6.6024	Down
SNCG	-1.55895	7.46066	-5.34237	1.52673e-07	5.81349e-07	6.63403	Down
CBLIF	-3.87937	5.74086	-5.34471	1.50841e-07	5.74724e-07	6.64567	Down
METTL24	-2.07952	5.65207	-5.34668	1.49316e-07	5.69749e-07	6.65546	Down
CLDN5	-1.34222	9.59053	-5.35855	1.40437e-07	5.38717e-07	6.71454	Down
NEFL	-2.41445	3.9723	-5.3612	1.38521e-07	5.32244e-07	6.72778	Down
DUSP26	-1.89427	4.89819	-5.36855	1.33355e-07	5.13666e-07	6.76442	Down
PER1	-1.22983	11.6054	-5.36872	1.33233e-07	5.13408e-07	6.7653	Down
SYNM	-2.5915	11.046	-5.37119	1.31542e-07	5.07415e-07	6.77761	Down
NDRG2	-1.10297	11.3614	-5.37762	1.27229e-07	4.92407e-07	6.80975	Down
C14orf180	-1.71527	1.48763	-5.38341	1.23468e-07	4.79543e-07	6.83868	Down
MAPK4	-2.79855	5.71237	-5.38499	1.22457e-07	4.76014e-07	6.84661	Down
UNC5D	-2.08523	3.47721	-5.3889	1.19999e-07	4.67046e-07	6.86615	Down
BMPER	-1.86925	5.92124	-5.38969	1.19507e-07	4.65446e-07	6.87012	Down
SLC18A3	-2.35894	2.32231	-5.39481	1.16366e-07	4.54519e-07	6.8958	Down
CCKAR	-2.70469	3.17418	-5.39483	1.16355e-07	4.54519e-07	6.89589	Down
NPY	-2.47409	3.31418	-5.40531	1.10184e-07	4.32274e-07	6.94844	Down
TSC22D3	-1.21498	12.0779	-5.40556	1.10039e-07	4.31795e-07	6.94971	Down
BEND5	-1.72667	5.8531	-5.40972	1.0768e-07	4.2334e-07	6.97061	Down
HTR4	-1.96145	2.87215	-5.41315	1.05773e-07	4.16368e-07	6.98784	Down
ALKAL2	-1.40672	4.47917	-5.41468	1.0493e-07	4.13224e-07	6.99556	Down
EFS	-1.41981	8.20111	-5.41963	1.02258e-07	4.03468e-07	7.02044	Down
GPR12	-1.503	1.52992	-5.43491	9.44117e-08	3.74732e-07	7.09744	Down
KIAA0408	-1.97225	2.51717	-5.43907	9.23792e-08	3.67761e-07	7.11843	Down
ARL4D	-1.69699	7.04088	-5.44101	9.14485e-08	3.6429e-07	7.1282	Down
DUSP1	-1.29419	13.3134	-5.44518	8.94708e-08	3.57327e-07	7.14929	Down
AMTN	-2.13233	1.87395	-5.45791	8.36972e-08	3.35635e-07	7.21365	Down
HTR7	-1.51332	4.38027	-5.4601	8.27411e-08	3.32373e-07	7.22474	Down
PPP1R14A	-1.6554	9.06077	-5.46135	8.21998e-08	3.30341e-07	7.23107	Down
LY6H	-1.71864	4.69747	-5.46645	8.00242e-08	3.22711e-07	7.25695	Down
LGALS9B	-2.31734	6.15506	-5.46954	7.87356e-08	3.17996e-07	7.27262	Down
NEFM	-1.84603	3.93461	-5.47056	7.83163e-08	3.16371e-07	7.27777	Down
CPO	-1.58645	2.90447	-5.47068	7.82654e-08	3.16233e-07	7.2784	Down
GSTA3	-1.54089	1.3737	-5.47123	7.80401e-08	3.1546e-07	7.28118	Down
ANGPTL7	-2.01499	4.55231	-5.47166	7.78629e-08	3.14949e-07	7.28337	Down
CHRDL1	-2.97755	7.80152	-5.476	7.61075e-08	3.08183e-07	7.30538	Down
SCUBE1	-1.74101	8.24582	-5.48903	7.10608e-08	2.89697e-07	7.3716	Down
IGSF11	-2.02978	4.86996	-5.49299	6.95925e-08	2.84147e-07	7.39175	Down
LGALS9C	-2.23657	6.79332	-5.50486	6.53655e-08	2.68357e-07	7.45224	Down
ASAH2	-1.60463	6.60262	-5.5114	6.31436e-08	2.59864e-07	7.48562	Down
PTH1R	-1.49868	5.39239	-5.51991	6.03629e-08	2.49467e-07	7.5291	Down
FAM181B	-1.94802	3.88067	-5.52227	5.96115e-08	2.4658e-07	7.5412	Down
JAM2	-1.48812	9.42182	-5.52394	5.9087e-08	2.44564e-07	7.54973	Down
GABRA5	-2.31566	2.55652	-5.52762	5.79454e-08	2.40222e-07	7.56857	Down
PLD5	-2.21489	3.13872	-5.55613	4.98023e-08	2.09349e-07	7.71481	Down
ID4	-1.36629	9.28048	-5.56117	4.84831e-08	2.0408e-07	7.74074	Down
PTCHD1	-2.52442	5.93141	-5.56743	4.68916e-08	1.97917e-07	7.77298	Down
NEGR1	-1.85382	8.95138	-5.57315	4.54838e-08	1.92498e-07	7.80242	Down
ASB2	-1.97989	8.68489	-5.57319	4.54739e-08	1.92498e-07	7.80263	Down
CD36	-1.53476	9.51978	-5.57434	4.51956e-08	1.91435e-07	7.80856	Down
SLC22A17	-1.51266	8.8985	-5.57634	4.47143e-08	1.89629e-07	7.81891	Down
GFRA3	-2.30589	6.28857	-5.58335	4.30714e-08	1.83161e-07	7.85507	Down
ACTG2	-2.83565	13.02	-5.58538	4.26062e-08	1.81307e-07	7.86556	Down
ELANE	-1.78147	2.99104	-5.59608	4.02374e-08	1.71931e-07	7.92083	Down
ACKR1	-2.30263	9.09682	-5.59665	4.01141e-08	1.71446e-07	7.92379	Down
DIRAS1	-2.09983	6.08122	-5.60542	3.82728e-08	1.64337e-07	7.9692	Down
RPTN	-2.1342	1.37984	-5.60612	3.81297e-08	1.63791e-07	7.97282	Down
SH3BGR	-1.36316	6.92271	-5.61103	3.71388e-08	1.59976e-07	7.99826	Down
DES	-3.67528	12.4606	-5.61591	3.61788e-08	1.56275e-07	8.02357	Down
PTGR1	-1.11027	10.8884	-5.64459	3.10045e-08	1.35367e-07	8.17274	Down
KCNK3	-2.27146	7.37704	-5.65116	2.99255e-08	1.31024e-07	8.20699	Down
SNRPN	-1.31709	9.2981	-5.65873	2.87265e-08	1.26071e-07	8.24652	Down
TNXB	-2.02348	10.7055	-5.66795	2.73304e-08	1.20283e-07	8.29469	Down
MMP27	-1.38592	1.62395	-5.6695	2.71021e-08	1.19391e-07	8.3028	Down
SPINK2	-1.89984	2.78578	-5.67445	2.63854e-08	1.16454e-07	8.32871	Down
CHGA	-3.83057	7.33722	-5.67559	2.62235e-08	1.15796e-07	8.33466	Down
RGS2	-1.39369	11.0552	-5.68972	2.42895e-08	1.0774e-07	8.40874	Down
KCNE2	-2.86257	5.16777	-5.7072	2.20892e-08	9.88498e-08	8.50058	Down
NRG2	-1.87633	5.41287	-5.71207	2.15117e-08	9.65206e-08	8.5262	Down
LRRC4	-1.26577	7.04093	-5.71824	2.08012e-08	9.35805e-08	8.55869	Down
TAGLN3	-2.21263	2.82168	-5.71961	2.06462e-08	9.29505e-08	8.56592	Down
KAT2B	-1.04785	10.5241	-5.72188	2.03931e-08	9.1944e-08	8.57786	Down
AFF3	-2.02102	7.58834	-5.72632	1.99046e-08	8.99592e-08	8.60131	Down
PNCK	-2.6759	6.32516	-5.73212	1.9285e-08	8.73705e-08	8.63191	Down
SRPX	-1.71217	8.66465	-5.73954	1.85197e-08	8.41692e-08	8.67108	Down
TTC36	-1.52919	4.67644	-5.74013	1.84601e-08	8.39804e-08	8.6742	Down
PLN	-2.48758	8.9046	-5.75316	1.71897e-08	7.86422e-08	8.74319	Down
LMX1A	-2.04717	1.8029	-5.76055	1.65082e-08	7.56732e-08	8.78233	Down
COX7A1	-1.18847	8.26362	-5.76324	1.62663e-08	7.46562e-08	8.79662	Down
WSCD2	-2.74197	6.08949	-5.76389	1.62088e-08	7.44286e-08	8.80005	Down
INSYN1	-1.81698	6.59551	-5.76841	1.58116e-08	7.27123e-08	8.82405	Down
PCP4L1	-2.76143	5.04219	-5.77219	1.54875e-08	7.1333e-08	8.8441	Down
MYL9	-1.96921	13.9649	-5.77514	1.52388e-08	7.02517e-08	8.85976	Down
ABCA8	-2.34569	8.19835	-5.77855	1.49558e-08	6.90272e-08	8.87791	Down
ADRB3	-2.20046	3.32219	-5.78067	1.47825e-08	6.83404e-08	8.88919	Down
ASB11	-1.8452	2.37254	-5.7898	1.4059e-08	6.52484e-08	8.93776	Down
CPB1	-2.40827	3.31171	-5.7909	1.39743e-08	6.48897e-08	8.94361	Down
NGB	-2.15032	1.57836	-5.7954	1.36323e-08	6.3479e-08	8.9676	Down
HSPB6	-2.92443	10.8837	-5.80142	1.31875e-08	6.15867e-08	8.99971	Down
ARC	-2.38824	5.48543	-5.80234	1.3121e-08	6.13069e-08	9.0046	Down
NTN1	-1.91121	10.1407	-5.80683	1.27998e-08	5.98663e-08	9.02859	Down
CNN1	-2.80455	11.6945	-5.81039	1.2551e-08	5.88207e-08	9.04759	Down
SOX15	-1.73049	6.64384	-5.8106	1.25364e-08	5.87818e-08	9.04872	Down
PRKN	-1.46238	6.93089	-5.82068	1.18581e-08	5.57837e-08	9.10257	Down
TCEAL2	-3.11996	5.482	-5.82618	1.15028e-08	5.43136e-08	9.13203	Down
RERGL	-2.18568	4.98262	-5.82813	1.13795e-08	5.37899e-08	9.14247	Down
SCUBE2	-1.79512	7.75913	-5.83801	1.07739e-08	5.10502e-08	9.19542	Down
NOS1	-2.45097	4.87848	-5.84118	1.05866e-08	5.02971e-08	9.2124	Down
VWC2	-2.25557	3.64395	-5.84285	1.04891e-08	4.98595e-08	9.22136	Down
TMOD1	-2.02277	7.85422	-5.84325	1.04658e-08	4.97739e-08	9.22352	Down
DCAF12L1	-1.74566	1.29532	-5.84359	1.0446e-08	4.96925e-08	9.22535	Down
PNLIPRP3	-1.87268	1.16462	-5.84788	1.02005e-08	4.86363e-08	9.24838	Down
PDZD4	-2.07378	6.91379	-5.85591	9.75588e-09	4.66715e-08	9.29154	Down
ENDOU	-2.08353	3.53809	-5.85711	9.69117e-09	4.64061e-08	9.29799	Down
MTUS2	-2.02773	4.76327	-5.86051	9.51027e-09	4.56018e-08	9.31624	Down
KLF4	-1.32037	12.3165	-5.86505	9.27326e-09	4.45685e-08	9.34068	Down
NEXMIF	-2.31585	5.02806	-5.86551	9.24944e-09	4.44655e-08	9.34317	Down
DMRTA1	-2.53644	5.34847	-5.87294	8.87496e-09	4.2842e-08	9.3832	Down
ATOH8	-1.68555	7.50722	-5.87387	8.8294e-09	4.26552e-08	9.38819	Down
ACADL	-2.03337	3.92729	-5.88587	8.25817e-09	4.01139e-08	9.45298	Down
FAXDC2	-1.5809	9.57904	-5.89201	7.98026e-09	3.88449e-08	9.48614	Down
FCER1A	-2.31573	5.37817	-5.89555	7.82418e-09	3.81649e-08	9.50528	Down
CTXND1	-2.41218	4.52459	-5.90856	7.27577e-09	3.56859e-08	9.57568	Down
DNER	-2.57046	5.36169	-5.92848	6.50802e-09	3.2145e-08	9.68374	Down
GRIA4	-1.9321	4.07361	-5.9484	5.81951e-09	2.89779e-08	9.79211	Down
SST	-3.86614	5.134	-5.95808	5.51119e-09	2.75235e-08	9.84488	Down
GSG1L	-1.52583	2.54158	-5.96185	5.39547e-09	2.69672e-08	9.86545	Down
OPCML	-1.7322	4.30925	-5.96784	5.21648e-09	2.61638e-08	9.89815	Down
CALY	-2.24062	3.86396	-5.97054	5.1376e-09	2.5789e-08	9.91292	Down
PLIN1	-2.20821	5.30297	-5.97196	5.09647e-09	2.56101e-08	9.92071	Down
GFRA1	-2.6944	8.54874	-5.97473	5.01751e-09	2.52474e-08	9.93585	Down
NSG2	-2.42384	3.6134	-5.97598	4.98246e-09	2.50913e-08	9.94265	Down
MAB21L1	-1.96486	3.44634	-5.98248	4.8028e-09	2.42586e-08	9.97825	Down
HBA2	-1.9334	8.6445	-5.98821	4.64984e-09	2.35562e-08	10.0096	Down
TAFA4	-3.08629	3.14616	-5.99111	4.57437e-09	2.31865e-08	10.0255	Down
ZNF536	-2.19521	5.12172	-6.00513	4.22559e-09	2.15948e-08	10.1024	Down
PTF1A	-1.94084	1.41793	-6.01233	4.05649e-09	2.07876e-08	10.142	Down
BCHE	-2.48774	5.88374	-6.01714	3.94753e-09	2.02682e-08	10.1684	Down
KCNMB1	-2.06798	9.43488	-6.0192	3.90167e-09	2.00603e-08	10.1797	Down
PKNOX2	-1.7371	6.48525	-6.03021	3.66506e-09	1.89168e-08	10.2404	Down
APOBEC2	-1.91586	5.44016	-6.03047	3.65967e-09	1.88995e-08	10.2418	Down
TSLP	-1.7584	5.16401	-6.03705	3.52541e-09	1.82618e-08	10.2781	Down
MYH11	-3.18027	14.288	-6.04194	3.4287e-09	1.78203e-08	10.3051	Down
LMOD1	-2.5291	10.9096	-6.05166	3.24405e-09	1.69551e-08	10.3588	Down
GPER1	-1.98048	7.12764	-6.05982	3.09661e-09	1.623e-08	10.4039	Down
PCOLCE2	-2.35018	5.84031	-6.06087	3.07803e-09	1.61508e-08	10.4097	Down
INA	-2.11018	4.72446	-6.06218	3.05523e-09	1.60402e-08	10.4169	Down
KCNA2	-2.14942	4.17498	-6.06336	3.03465e-09	1.59366e-08	10.4235	Down
HSPB3	-2.23768	1.85009	-6.07218	2.8856e-09	1.5201e-08	10.4724	Down
METTL7A	-1.34206	11.6733	-6.07465	2.84513e-09	1.50005e-08	10.4861	Down
SMIM5	-1.59903	7.2642	-6.07733	2.80196e-09	1.4798e-08	10.5009	Down
PKHD1L1	-2.02781	5.38705	-6.08476	2.68533e-09	1.42223e-08	10.5421	Down
SGCG	-2.03533	3.018	-6.0901	2.60455e-09	1.38299e-08	10.5718	Down
TRIM50	-2.59029	3.60308	-6.09107	2.59011e-09	1.3761e-08	10.5772	Down
FNDC5	-1.89667	6.19203	-6.0923	2.57184e-09	1.36717e-08	10.584	Down
AKR1B15	-2.73778	4.29779	-6.09278	2.56488e-09	1.36425e-08	10.5867	Down
CDH22	-2.39685	3.56572	-6.09411	2.54534e-09	1.35463e-08	10.5941	Down
RPS6KA6	-2.30191	5.73643	-6.10361	2.41048e-09	1.28949e-08	10.6469	Down
USP2	-1.76494	7.55036	-6.10613	2.37589e-09	1.27354e-08	10.661	Down
WIF1	-2.97239	3.08793	-6.10718	2.36158e-09	1.2666e-08	10.6668	Down
BTG2	-1.32227	13.0108	-6.1157	2.24879e-09	1.21063e-08	10.7143	Down
CTSG	-2.64203	4.64687	-6.12255	2.16203e-09	1.16561e-08	10.7525	Down
CNTFR	-3.03436	6.04695	-6.15269	1.81737e-09	9.93584e-09	10.9211	Down
LDB3	-2.51775	7.45132	-6.16278	1.71448e-09	9.42309e-09	10.9776	Down
PHYHD1	-1.67577	7.89739	-6.16393	1.70314e-09	9.36904e-09	10.9841	Down
RBPMS2	-2.245	8.8812	-6.17534	1.59436e-09	8.84109e-09	11.0482	Down
KLF15	-2.33389	7.07434	-6.19673	1.4084e-09	7.87172e-09	11.1686	Down
OTOP3	-3.35281	3.8626	-6.20159	1.36922e-09	7.67016e-09	11.196	Down
XKR4	-2.4005	5.04623	-6.20333	1.35543e-09	7.60435e-09	11.2058	Down
CAB39L	-1.364	9.6097	-6.22178	1.21751e-09	6.88863e-09	11.31	Down
LRRTM1	-2.60536	3.41808	-6.22906	1.16697e-09	6.62279e-09	11.3512	Down
KCNB1	-2.88075	5.90301	-6.23396	1.13408e-09	6.45381e-09	11.379	Down
MMRN1	-2.23031	8.10827	-6.24109	1.08787e-09	6.20407e-09	11.4194	Down
CYP4B1	-2.58213	5.29056	-6.25289	1.01541e-09	5.81933e-09	11.4864	Down
MT1A	-2.38878	5.3547	-6.25399	1.00891e-09	5.78787e-09	11.4926	Down
ENPP3	-2.09311	5.09445	-6.25459	1.00538e-09	5.77428e-09	11.496	Down
NAP1L2	-2.3103	5.17812	-6.2554	1.00065e-09	5.75241e-09	11.5006	Down
PTGS1	-1.45187	10.5246	-6.27456	8.94482e-10	5.1885e-09	11.6096	Down
FAM135B	-2.41386	3.66011	-6.28543	8.39222e-10	4.88925e-09	11.6715	Down
KCTD8	-2.5904	2.68471	-6.28673	8.32831e-10	4.85809e-09	11.6789	Down
HMGCLL1	-1.99238	3.28482	-6.28948	8.19491e-10	4.78327e-09	11.6946	Down
CDH19	-3.11388	5.54133	-6.29221	8.06472e-10	4.71466e-09	11.7102	Down
ADAMTSL1	-1.63617	8.39305	-6.29241	8.05497e-10	4.71044e-09	11.7114	Down
DNASE1L3	-2.16399	6.72755	-6.31198	7.17917e-10	4.23414e-09	11.8232	Down
GHR	-1.92025	7.50527	-6.3262	6.60224e-10	3.92618e-09	11.9047	Down
TMEM252	-2.75598	4.18799	-6.32851	6.51286e-10	3.87673e-09	11.9179	Down
GSTM2	-1.41364	8.62522	-6.35268	5.64602e-10	3.40313e-09	12.0567	Down
ENPP6	-1.97567	4.77272	-6.35956	5.42062e-10	3.27574e-09	12.0964	Down
PDZRN4	-3.00401	5.85069	-6.37139	5.05352e-10	3.0721e-09	12.1645	Down
UBE2QL1	-1.95167	6.05376	-6.37842	4.8471e-10	2.95695e-09	12.2051	Down
TCEAL6	-1.91994	1.9311	-6.3802	4.79592e-10	2.93245e-09	12.2154	Down
PLIN4	-3.03659	8.4238	-6.40484	4.14221e-10	2.55875e-09	12.3579	Down
PDK4	-2.35627	11.3078	-6.41096	3.99388e-10	2.47451e-09	12.3934	Down
HLF	-2.20648	7.86279	-6.4158	3.88047e-10	2.40664e-09	12.4214	Down
GFRA4	-1.59191	0.995017	-6.42539	3.66444e-10	2.28558e-09	12.4771	Down
SLC6A4	-2.18276	5.13981	-6.43805	3.39746e-10	2.13838e-09	12.5507	Down
GIP	-2.94913	2.60778	-6.44109	3.33641e-10	2.10351e-09	12.5683	Down
SCN7A	-3.06995	6.24608	-6.44211	3.31599e-10	2.09134e-09	12.5743	Down
PLAC9	-1.52642	7.69907	-6.44646	3.23085e-10	2.03972e-09	12.5996	Down
MYOT	-2.06694	4.93307	-6.45656	3.04125e-10	1.93047e-09	12.6584	Down
CCDC69	-1.70191	10.9783	-6.46438	2.9019e-10	1.84579e-09	12.704	Down
FOXI2	-2.00065	2.77779	-6.46813	2.83725e-10	1.80899e-09	12.726	Down
MYZAP	-1.64382	7.14873	-6.47202	2.77179e-10	1.77149e-09	12.7487	Down
LGI4	-1.6045	7.39725	-6.47742	2.6834e-10	1.71972e-09	12.7802	Down
SLC25A4	-1.35078	10.6486	-6.49928	2.35272e-10	1.52192e-09	12.9082	Down
CD300LG	-2.1855	3.1081	-6.50473	2.27666e-10	1.47477e-09	12.9401	Down
LCN6	-1.98257	3.01171	-6.50858	2.22446e-10	1.44196e-09	12.9627	Down
GKN2	-5.63676	6.50817	-6.51694	2.11508e-10	1.37824e-09	13.0118	Down
SPINK7	-3.20587	2.73452	-6.51706	2.11352e-10	1.37771e-09	13.0125	Down
PLCXD3	-2.84808	5.59334	-6.52337	2.03447e-10	1.3299e-09	13.0496	Down
ANGPTL1	-2.8172	7.39146	-6.52422	2.02408e-10	1.3245e-09	13.0546	Down
PPP1R3C	-2.26422	7.88327	-6.52617	2.00035e-10	1.31081e-09	13.0661	Down
GKN1	-6.32879	7.39736	-6.57404	1.49669e-10	9.99737e-10	13.3484	Down
SYT10	-2.19052	2.18552	-6.57655	1.47405e-10	9.86032e-10	13.3633	Down
SLC2A4	-2.34632	7.65774	-6.63332	1.04268e-10	7.13345e-10	13.7004	Down
PGA3	-5.93002	4.90725	-6.63376	1.03984e-10	7.11922e-10	13.703	Down
OLFM3	-2.09643	1.53772	-6.64652	9.61682e-11	6.63042e-10	13.7791	Down
CBR1	-1.24254	11.1391	-6.6769	7.98078e-11	5.57459e-10	13.9608	Down
SGCA	-2.51278	7.18168	-6.67774	7.93964e-11	5.54793e-10	13.9658	Down
CHIA	-2.89605	1.62255	-6.6817	7.74868e-11	5.42262e-10	13.9895	Down
MT1X	-1.40645	10.0053	-6.69268	7.24194e-11	5.0967e-10	14.0554	Down
ANKRD35	-1.77346	6.94907	-6.7287	5.79831e-11	4.15173e-10	14.272	Down
RSPO2	-2.85522	5.45453	-6.73563	5.55488e-11	3.98307e-10	14.3138	Down
SORCS1	-2.87792	5.06994	-6.7373	5.49759e-11	3.94502e-10	14.3239	Down
COL4A6	-2.95398	7.49263	-6.7655	4.61576e-11	3.36534e-10	14.4943	Down
P2RY14	-1.91368	7.8761	-6.76582	4.60653e-11	3.35992e-10	14.4962	Down
TMEM35A	-2.88275	5.54652	-6.77078	4.46668e-11	3.26686e-10	14.5263	Down
GPM6A	-2.50235	5.14954	-6.77824	4.26434e-11	3.1361e-10	14.5715	Down
GRIK3	-2.86745	5.17668	-6.79377	3.87131e-11	2.87198e-10	14.6657	Down
TRARG1	-2.84402	2.76293	-6.80882	3.52439e-11	2.6282e-10	14.7573	Down
CKB	-2.24975	11.9277	-6.81008	3.49693e-11	2.60878e-10	14.7649	Down
FABP4	-2.76496	6.45723	-6.81068	3.4838e-11	2.60106e-10	14.7685	Down
ZBTB16	-2.79038	7.01354	-6.82121	3.26206e-11	2.45122e-10	14.8327	Down
CASQ2	-3.11417	6.56299	-6.82507	3.18416e-11	2.39751e-10	14.8562	Down
HPGD	-2.438	11.0893	-6.85151	2.69842e-11	2.05669e-10	15.0176	Down
AKR1C1	-2.42243	9.81216	-6.8855	2.17943e-11	1.68105e-10	15.2259	Down
DAB1	-2.48353	5.7613	-6.89819	2.01205e-11	1.55904e-10	15.3039	Down
DPP6	-3.24266	4.954	-6.91074	1.85886e-11	1.44756e-10	15.3811	Down
CCKBR	-3.52883	4.24956	-6.94172	1.52821e-11	1.20773e-10	15.5722	Down
HBB	-2.44352	9.52743	-6.94995	1.45061e-11	1.1508e-10	15.623	Down
KCNA5	-2.3504	5.46798	-6.9548	1.40662e-11	1.11732e-10	15.653	Down
PGM5	-2.94098	9.52304	-6.96143	1.34871e-11	1.07453e-10	15.6941	Down
GFRA2	-2.1227	5.59766	-6.9688	1.28702e-11	1.0289e-10	15.7397	Down
GPM6B	-1.75852	8.21384	-6.99383	1.09765e-11	8.86633e-11	15.895	Down
ADGRG4	-2.57222	2.28255	-6.99823	1.06731e-11	8.63996e-11	15.9224	Down
ADCYAP1R1	-2.82156	4.61405	-7.01117	9.82744e-12	8.00756e-11	16.0029	Down
CITED2	-1.18517	11.3604	-7.02486	9.00525e-12	7.40887e-11	16.0882	Down
CADM2	-3.06121	4.62645	-7.02531	8.97949e-12	7.39093e-11	16.091	Down
GSN	-1.3976	14.547	-7.05834	7.26796e-12	6.0652e-11	16.2974	Down
PRRT4	-2.51222	3.6227	-7.06201	7.09863e-12	5.93718e-11	16.3204	Down
PTN	-1.87873	8.48777	-7.07212	6.65275e-12	5.60448e-11	16.3837	Down
NRXN1	-3.0227	5.3627	-7.07318	6.60779e-12	5.57164e-11	16.3904	Down
ADH1B	-3.74711	8.65015	-7.07399	6.57328e-12	5.54505e-11	16.3955	Down
PYGM	-2.30988	6.81908	-7.07863	6.38042e-12	5.39212e-11	16.4245	Down
HBA1	-2.61356	5.805	-7.09805	5.63095e-12	4.80227e-11	16.5465	Down
S100B	-1.90788	7.12712	-7.09947	5.57971e-12	4.76075e-11	16.5555	Down
AQP10	-3.05677	3.19476	-7.11417	5.07547e-12	4.36228e-11	16.6479	Down
ADIPOQ	-3.70115	2.74386	-7.1284	4.62996e-12	4.01098e-11	16.7377	Down
DEFB131A	-1.52949	0.584294	-7.14748	4.09236e-12	3.57851e-11	16.8582	Down
MPZ	-1.74665	6.4341	-7.21216	2.68883e-12	2.4158e-11	17.2684	Down
HSPB8	-2.55866	9.93894	-7.24066	2.23237e-12	2.03611e-11	17.4502	Down
TMEM132C	-3.04565	4.32465	-7.24666	2.14655e-12	1.96456e-11	17.4885	Down
SPX	-2.47086	3.15309	-7.27472	1.78628e-12	1.66591e-11	17.668	Down
CRYAB	-2.29679	9.69517	-7.30083	1.50478e-12	1.42187e-11	17.8355	Down
FHL1	-2.59246	11.662	-7.30198	1.49346e-12	1.41304e-11	17.8429	Down
IGFBP6	-1.77716	9.67951	-7.30629	1.45175e-12	1.37525e-11	17.8706	Down
PGA4	-3.2271	1.18077	-7.31293	1.38965e-12	1.31978e-11	17.9133	Down
PRIMA1	-3.56324	7.2772	-7.3218	1.31077e-12	1.25124e-11	17.9704	Down
NPPC	-2.73448	3.4191	-7.32463	1.28661e-12	1.23069e-11	17.9886	Down
NCAM1	-2.62526	8.2673	-7.32661	1.26985e-12	1.21592e-11	18.0014	Down
HTR1E	-2.21913	1.31774	-7.33121	1.23193e-12	1.18385e-11	18.0311	Down
SLITRK3	-3.07141	3.36942	-7.36329	9.96667e-13	9.76912e-12	18.2382	Down
PPP1R1A	-3.42853	6.0898	-7.36716	9.71512e-13	9.53258e-12	18.2632	Down
ATP1A2	-3.58773	7.09904	-7.37406	9.28091e-13	9.13056e-12	18.3079	Down
AKR1C2	-3.03471	8.53654	-7.41371	7.13344e-13	7.13842e-12	18.5652	Down
EMILIN3	-2.17259	5.33469	-7.45135	5.55135e-13	5.68617e-12	18.8104	Down
SLC5A7	-3.03997	3.01982	-7.45346	5.47386e-13	5.61018e-12	18.8241	Down
RPRM	-3.13327	3.95159	-7.45569	5.39286e-13	5.53886e-12	18.8387	Down
SFRP1	-3.5203	8.47925	-7.47575	4.71632e-13	4.8848e-12	18.9698	Down
SLC7A3	-2.5521	2.7312	-7.48652	4.38821e-13	4.57291e-12	19.0403	Down
GCNT4	-2.38459	8.2479	-7.49841	4.0521e-13	4.25596e-12	19.1182	Down
CHODL	-2.58814	4.29307	-7.54461	2.9708e-13	3.18302e-12	19.4219	Down
HPSE2	-2.89804	4.70366	-7.55625	2.74672e-13	2.96166e-12	19.4986	Down
VIT	-2.62465	5.16325	-7.56626	2.56738e-13	2.7844e-12	19.5646	Down
PMP2	-2.83856	3.01037	-7.56695	2.55546e-13	2.77307e-12	19.5692	Down
SCNN1G	-3.47563	4.0023	-7.59634	2.09507e-13	2.30842e-12	19.7635	Down
CMA1	-2.89885	3.15219	-7.62209	1.75961e-13	1.96081e-12	19.9343	Down
SOSTDC1	-3.86024	6.56225	-7.63682	1.59218e-13	1.79462e-12	20.0321	Down
LGI3	-2.83112	3.27235	-7.63699	1.59028e-13	1.79356e-12	20.0333	Down
FAM107A	-2.23639	8.38538	-7.64682	1.48748e-13	1.69092e-12	20.0987	Down
PGA5	-5.32988	3.71934	-7.67912	1.19376e-13	1.38115e-12	20.314	Down
ADHFE1	-2.1048	6.2705	-7.74589	7.5602e-14	9.01759e-13	20.7611	Down
ATP4B	-5.18746	4.1833	-7.81404	4.72877e-14	5.8616e-13	21.2206	Down
ASPA	-2.3847	6.31348	-7.83089	4.20892e-14	5.2627e-13	21.3346	Down
TMEM100	-3.02791	6.48972	-7.85659	3.52273e-14	4.46156e-13	21.5089	Down
C1QL1	-2.17994	6.5571	-7.86508	3.32142e-14	4.23249e-13	21.5666	Down
NKX6-2	-4.19053	3.58752	-7.92366	2.20971e-14	2.91961e-13	21.9658	Down
ECRG4	-4.29754	6.71736	-7.97665	1.5257e-14	2.09298e-13	22.3287	Down
ATP4A	-5.23781	4.51713	-7.97788	1.51255e-14	2.07647e-13	22.3371	Down
LGI1	-2.96583	3.33234	-8.04464	9.46052e-15	1.3443e-13	22.797	Down
ADRB2	-2.22127	6.51699	-8.13681	4.92777e-15	7.35536e-14	23.4363	Down
MT1M	-2.95993	6.49501	-8.15679	4.27491e-15	6.46369e-14	23.5756	Down
RDH12	-2.71044	5.62857	-8.1811	3.59503e-15	5.53902e-14	23.7455	Down
CADM3	-3.75312	6.15537	-8.19351	3.29056e-15	5.10116e-14	23.8322	Down
PCSK2	-3.70693	4.2178	-8.24481	2.27961e-15	3.65109e-14	24.1921	Down
ESRRG	-3.43996	6.25373	-8.32103	1.31749e-15	2.19499e-14	24.7299	Down
NT5C1A	-2.19264	1.89862	-8.38224	8.46218e-16	1.45939e-14	25.1642	Down
GSTM5	-2.40236	7.07037	-8.45472	4.99494e-16	8.97117e-15	25.6814	Down
HPCAL4	-2.78256	4.00395	-8.47564	4.28754e-16	7.83654e-15	25.8313	Down
FXYD1	-2.56388	5.09282	-8.51241	3.27623e-16	6.0896e-15	26.0953	Down
PI16	-4.08716	6.76578	-8.52039	3.08998e-16	5.76642e-15	26.1527	Down
MAMDC2	-3.57766	7.16797	-8.52792	2.92399e-16	5.5007e-15	26.2069	Down
LRRC3B	-2.32708	2.25024	-8.53621	2.75136e-16	5.18641e-15	26.2666	Down
GNG7	-2.23669	8.44758	-8.59132	1.83431e-16	3.5846e-15	26.6646	Down
CIDEA	-3.31696	2.25664	-8.63482	1.3303e-16	2.67826e-15	26.98	Down
SH3GL2	-3.27395	3.30957	-8.65909	1.11146e-16	2.29742e-15	27.1564	Down
VSTM2A	-3.44213	2.98158	-8.69034	8.81442e-17	1.85681e-15	27.3841	Down
P2RX2	-3.11871	3.40373	-8.77081	4.83885e-17	1.05881e-15	27.973	Down
LYVE1	-2.52129	7.79025	-8.83649	2.95803e-17	6.66826e-16	28.4564	Down
PCARE	-2.35952	1.6714	-8.84052	2.86969e-17	6.51641e-16	28.4861	Down
C16orf89	-3.65374	6.83306	-8.87888	2.15019e-17	4.97962e-16	28.7697	Down
SCARA5	-3.86213	7.36329	-9.00497	8.27849e-18	2.05234e-16	29.7075	Down
RXRG	-2.96805	3.60859	-9.01159	7.87167e-18	1.96455e-16	29.757	Down
PLP1	-4.32262	5.31868	-9.06557	5.21658e-18	1.32859e-16	30.1613	Down
PEBP4	-2.87837	3.20762	-9.08154	4.61715e-18	1.19221e-16	30.2812	Down
FAM180B	-2.86683	2.29131	-9.24952	1.26847e-18	3.62239e-17	31.5512	Down
CCN5	-3.35371	5.76042	-9.26664	1.11099e-18	3.20621e-17	31.6816	Down
CKMT2	-2.46601	6.18446	-9.33382	6.59533e-19	1.99605e-17	32.1943	Down
CWH43	-4.66778	2.47213	-9.74766	2.52239e-20	9.3489e-19	35.4049	Down
GPX3	-2.34157	11.5521	-9.81331	1.49118e-20	5.77963e-19	35.9222	Down
CFD	-2.74994	10.4174	-9.84459	1.15996e-20	4.61089e-19	36.1694	Down
CMTM5	-3.11734	2.45508	-10.1794	7.65396e-22	3.73541e-20	38.8456	Down
ADH7	-5.51641	2.88816	-10.1859	7.26012e-22	3.5807e-20	38.8977	Down
KRT24	-4.2544	2.02583	-10.2984	2.87586e-22	1.51027e-20	39.8097	Down
VEGFD	-3.41986	4.92807	-10.3829	1.43024e-22	7.79646e-21	40.4977	Down
DPT	-3.93092	8.11399	-10.4449	8.54678e-23	4.82841e-21	41.0049	Down
SCNN1B	-4.20083	6.05961	-10.4873	6.00459e-23	3.47651e-21	41.3527	Down
AQP4	-4.43157	2.80231	-10.6538	1.48922e-23	9.25448e-22	42.7265	Down
MYOC	-6.34119	4.75973	-11.1447	2.27872e-25	1.87974e-23	46.8464	Down
MAL	-5.23941	6.54212	-11.4597	1.48107e-26	1.39452e-24	49.5418	Down
CLEC3B	-3.04666	7.54459	-11.6297	3.33279e-27	3.63352e-25	51.0129	Down
SERTM1	-3.90773	1.76047	-11.9742	1.57238e-28	2.22075e-26	54.0255	Down
ANXA8	1.12984	4.13988	2.16892	0.0306648	0.0445687	-4.76973	Up
PADI1	1.18835	4.43411	2.17102	0.0305047	0.0443533	-4.76524	Up
LGALS7B	1.15804	3.78728	2.21446	0.0273483	0.040105	-4.67151	Up
VTCN1	1.13374	5.74802	2.21929	0.0270154	0.0396603	-4.66097	Up
TFF3	1.14506	11.214	2.2194	0.0270074	0.0396542	-4.66071	Up
CT45A1	1.0071	1.24573	2.22702	0.0264897	0.0389592	-4.64405	Up
GABRA3	1.41553	4.148	2.24182	0.0255084	0.0376706	-4.61152	Up
SLC3A1	1.10801	7.7344	2.24649	0.0252055	0.0372735	-4.60122	Up
LGR6	1.04442	7.96958	2.25669	0.0245548	0.0363717	-4.57863	Up
SAA2-SAA4	1.16515	3.24131	2.26008	0.0243418	0.0360878	-4.57111	Up
EREG	1.07075	7.00901	2.26441	0.0240722	0.0357307	-4.56148	Up
PLA2G2F	1.04326	4.98524	2.27432	0.0234641	0.0349171	-4.53936	Up
SLC35D3	1.11603	4.27692	2.27959	0.0231466	0.0344722	-4.52757	Up
ADH6	1.02593	7.86789	2.28014	0.0231135	0.0344284	-4.52633	Up
MAB21L4	1.03227	8.14323	2.2974	0.0221003	0.0330379	-4.48749	Up
SPDEF	1.11213	9.31051	2.3135	0.0211906	0.0318106	-4.45102	Up
PAH	1.15555	3.92664	2.31521	0.0210959	0.0316837	-4.44713	Up
ABCA12	1.09325	6.98197	2.3262	0.020496	0.0308774	-4.42206	Up
NEU4	1.07399	5.37068	2.33074	0.0202525	0.0305524	-4.41167	Up
KRT6B	1.60411	6.82433	2.33275	0.0201457	0.0304185	-4.40707	Up
SLC44A5	1.13323	7.27334	2.34021	0.0197529	0.0298834	-4.38993	Up
MUC4	1.27684	10.449	2.35603	0.0189427	0.0287464	-4.35345	Up
TM4SF20	1.64346	8.17771	2.35853	0.0188175	0.028582	-4.34767	Up
GATA4	1.14952	11.1528	2.36929	0.018286	0.0278404	-4.32268	Up
LMX1B	1.12942	5.22996	2.37165	0.0181715	0.0276819	-4.31719	Up
KCNJ3	1.23506	7.0747	2.37243	0.0181337	0.0276266	-4.31538	Up
KLK7	1.50894	6.84765	2.37574	0.0179738	0.0273987	-4.30764	Up
PAX5	1.14235	7.79725	2.38173	0.017688	0.027005	-4.29365	Up
PGLYRP4	1.0281	3.12332	2.3997	0.0168552	0.0258542	-4.25148	Up
S100A7A	1.10132	1.82039	2.4077	0.0164955	0.0253379	-4.2326	Up
TACSTD2	1.03	12.3434	2.41051	0.0163706	0.0251563	-4.22594	Up
INHA	1.07934	3.74832	2.41832	0.0160286	0.0246775	-4.20744	Up
PLA2G2D	1.10624	6.99117	2.42549	0.0157198	0.0242503	-4.19039	Up
FOXD1	1.05401	7.10206	2.42687	0.0156611	0.0241696	-4.18711	Up
HCAR1	1.02388	6.41785	2.44128	0.0150585	0.0233343	-4.15268	Up
PLPPR1	1.02361	3.80912	2.46759	0.0140112	0.0218568	-4.08932	Up
RSPO4	1.22162	4.12496	2.47839	0.0136005	0.0212784	-4.06313	Up
CT45A10	1.03721	1.09894	2.48251	0.0134464	0.0210586	-4.05309	Up
CLEC2L	1.11155	4.21548	2.49374	0.0130347	0.0204654	-4.02569	Up
SERPINA10	1.25569	3.62375	2.49698	0.012918	0.020301	-4.01776	Up
PADI3	1.18564	3.87173	2.50262	0.012717	0.0200121	-4.00393	Up
POU6F2	1.40839	4.65636	2.56452	0.0106881	0.0170408	-3.85021	Up
KLK15	1.05303	2.64667	2.56582	0.0106488	0.0169883	-3.84695	Up
MYBPHL	1.08538	3.2172	2.56657	0.0106262	0.0169537	-3.84506	Up
GABRP	1.47957	9.96187	2.56838	0.0105716	0.016871	-3.8405	Up
HOXD11	1.18742	1.80919	2.59387	0.00983105	0.0157973	-3.77605	Up
IGSF23	1.08336	4.13324	2.60338	0.00956699	0.0154128	-3.75185	Up
ELF5	1.37081	4.15193	2.6084	0.00942986	0.015209	-3.73902	Up
SAA1	1.40184	8.40487	2.61127	0.00935245	0.0150922	-3.73169	Up
SULT2B1	1.01884	8.60825	2.6152	0.0092474	0.014938	-3.72164	Up
ONECUT3	1.73913	8.22922	2.62825	0.00890567	0.0144297	-3.68813	Up
MAGEC2	1.48485	1.73818	2.62899	0.00888684	0.014403	-3.68625	Up
FAM183A	1.01239	3.19354	2.63411	0.00875612	0.0142035	-3.67305	Up
S100A7	1.94036	4.05819	2.6369	0.00868571	0.0141003	-3.66586	Up
MAGEA9B	1.30573	1.65813	2.64007	0.0086061	0.0139808	-3.65765	Up
S100A2	1.1983	7.47925	2.64352	0.0085203	0.0138523	-3.64872	Up
PNLIPRP1	1.05712	3.06264	2.64516	0.00848	0.0137913	-3.6445	Up
KRTAP3-1	1.08819	1.41001	2.64612	0.00845624	0.0137577	-3.642	Up
LCN2	1.33738	14.4143	2.64846	0.00839892	0.013674	-3.63593	Up
ANKRD18B	1.35278	4.01776	2.66152	0.00808555	0.0132158	-3.60201	Up
FGF20	1.259	2.87522	2.68021	0.007655	0.0125605	-3.55315	Up
ABHD12B	1.00418	4.32773	2.68322	0.00758768	0.0124566	-3.54526	Up
ITGBL1	1.12953	8.22458	2.68441	0.00756125	0.0124154	-3.54214	Up
LIN28B	1.38546	1.94928	2.68733	0.00749661	0.0123212	-3.53447	Up
FCRL3	1.07773	6.87416	2.71306	0.00694828	0.0114807	-3.46651	Up
VGLL1	1.57367	4.50827	2.71346	0.00693996	0.011468	-3.46544	Up
TYRP1	1.10198	6.55924	2.71711	0.00686529	0.0113536	-3.45575	Up
BPIFA1	1.12677	1.43075	2.71878	0.00683137	0.0113066	-3.45132	Up
UNC93A	1.48502	5.84941	2.72068	0.00679292	0.0112479	-3.44626	Up
PROX1	1.13849	8.83416	2.72966	0.00661383	0.0109738	-3.42232	Up
NCMAP	1.0177	7.41097	2.73221	0.00656374	0.0108955	-3.4155	Up
PNMA5	1.32251	2.90028	2.7343	0.00652311	0.0108339	-3.40994	Up
CFAP20DC	1.01111	6.70186	2.73494	0.00651053	0.0108159	-3.40821	Up
RIPPLY3	1.26024	4.6152	2.74275	0.00636053	0.0105799	-3.3873	Up
SEC14L4	1.32059	5.27785	2.74534	0.00631152	0.0105049	-3.38036	Up
DKK1	1.75371	7.23545	2.74645	0.00629057	0.0104766	-3.37738	Up
ONECUT1	1.32847	3.14391	2.75126	0.00620053	0.0103368	-3.36444	Up
PALM3	1.12203	7.62528	2.75337	0.00616158	0.0102774	-3.35879	Up
NR1I2	1.49213	8.12884	2.75415	0.0061471	0.010256	-3.35667	Up
HABP2	1.59042	8.87095	2.7612	0.00601842	0.0100539	-3.33768	Up
HOXD13	1.56442	2.26407	2.77885	0.00570673	0.00958055	-3.28989	Up
NKX6-3	2.02025	6.08999	2.77971	0.00569197	0.0095608	-3.28757	Up
NPHS1	1.05883	4.90348	2.78624	0.00558069	0.00939589	-3.26981	Up
ATOH1	1.6566	4.96102	2.79878	0.00537238	0.00907386	-3.23558	Up
NTSR1	1.32195	6.21101	2.80755	0.00523105	0.00885361	-3.21158	Up
CAMKV	1.1673	3.34259	2.81349	0.00513717	0.00871132	-3.19527	Up
SP9	1.07342	1.21308	2.82364	0.0049804	0.00846627	-3.16734	Up
CALB1	1.34529	5.17062	2.8243	0.00497032	0.0084499	-3.16551	Up
SLC13A5	1.179	4.60503	2.82829	0.00490993	0.00835562	-3.15449	Up
CTCFL	1.35966	3.1405	2.83084	0.00487173	0.00829743	-3.14745	Up
COX7B2	1.19474	1.39742	2.8477	0.0046258	0.00791037	-3.10072	Up
TRIM54	1.52408	5.79743	2.84953	0.00459982	0.0078681	-3.09563	Up
RBP4	1.46504	8.20558	2.85545	0.00451652	0.00773413	-3.07913	Up
RNF183	1.05544	6.74334	2.86227	0.00442234	0.00759028	-3.0601	Up
PROM1	1.25589	11.4362	2.87062	0.00430951	0.00741369	-3.03674	Up
MUC20	1.15174	10.2402	2.87432	0.00426043	0.00734146	-3.02639	Up
SFTPA2	1.29634	4.77923	2.88152	0.00416617	0.00719232	-3.00616	Up
LRRC31	1.2732	7.64696	2.88595	0.00410909	0.00710036	-2.99368	Up
CEACAM5	1.71143	13.8494	2.89015	0.0040557	0.00701525	-2.98185	Up
MUC17	2.03141	11.6083	2.89204	0.00403186	0.00697726	-2.97652	Up
SSX1	1.30375	1.63109	2.8985	0.00395146	0.00685041	-2.95828	Up
C12orf56	1.46566	4.20377	2.89922	0.0039426	0.00683739	-2.95625	Up
SPOCK1	1.17723	9.94783	2.91144	0.00379466	0.00659739	-2.92162	Up
ALOX12B	1.20004	4.53377	2.91981	0.00369621	0.00643944	-2.8978	Up
RNF17	1.0238	1.91072	2.92812	0.00360081	0.00628499	-2.8741	Up
ANKRD40CL	1.3091	7.60165	2.93451	0.00352901	0.00617005	-2.85584	Up
LAMA1	1.02639	6.65372	2.93793	0.00349122	0.00611087	-2.84607	Up
VWA5B1	1.32841	3.63653	2.94164	0.00345048	0.00604636	-2.83542	Up
AHSG	1.28336	2.39286	2.98824	0.00297507	0.00526876	-2.70076	Up
LDHC	1.34346	3.53952	2.99128	0.00294628	0.00522224	-2.69191	Up
GCNT3	1.25288	11.8424	3.00102	0.00285562	0.00507319	-2.66348	Up
SLC6A20	1.4622	9.57747	3.006	0.00281032	0.00499836	-2.64892	Up
CA6	1.15777	2.18046	3.01028	0.00277184	0.00493416	-2.63637	Up
THPO	1.08556	4.13954	3.01621	0.00271932	0.00484946	-2.61895	Up
H3C8	1.02223	5.27969	3.02016	0.00268489	0.00479218	-2.60734	Up
SLC6A3	1.09675	3.0502	3.0211	0.00267676	0.00478042	-2.60458	Up
PRR20G	1.23453	1.5408	3.02946	0.0026054	0.00466281	-2.57996	Up
GUCY2C	1.49902	9.5343	3.03208	0.00258335	0.00462779	-2.57221	Up
ABCB11	1.02388	3.11874	3.03828	0.00253198	0.00454318	-2.5539	Up
FGF3	1.255	1.57564	3.03843	0.00253078	0.00454231	-2.55347	Up
NKX2-5	1.35951	3.3786	3.04168	0.00250419	0.00449678	-2.54384	Up
LIPH	1.07546	11.3644	3.04808	0.00245267	0.00441234	-2.52488	Up
EN1	1.14273	2.05826	3.05075	0.00243141	0.00437832	-2.51694	Up
FOXL2	1.23285	2.76433	3.05087	0.00243047	0.00437705	-2.51659	Up
OLFM4	2.40956	13.3157	3.05255	0.00241723	0.00435447	-2.5116	Up
CDHR5	1.2295	11.7052	3.05524	0.00239613	0.00431855	-2.50361	Up
EPHB1	1.03751	7.65772	3.05657	0.00238578	0.00430155	-2.49965	Up
FFAR4	1.00601	6.41155	3.05743	0.00237904	0.00429066	-2.49708	Up
PRSS56	1.23636	1.65162	3.06408	0.00232796	0.00420748	-2.47726	Up
FAM216B	1.09081	3.86372	3.0654	0.00231796	0.00419062	-2.47333	Up
LILRA4	1.07951	4.11544	3.07093	0.00227644	0.00412315	-2.45683	Up
ZFP42	1.25962	1.65654	3.07432	0.0022513	0.00408278	-2.44669	Up
EDAR	1.34772	7.91779	3.07885	0.00221811	0.00402846	-2.43312	Up
SYT12	1.1826	6.36816	3.08129	0.00220041	0.00399983	-2.4258	Up
FAM83A	1.75684	7.4545	3.08358	0.00218398	0.00397268	-2.41896	Up
KRT15	1.38861	8.14728	3.08583	0.00216786	0.00394759	-2.41219	Up
IHH	1.44034	9.69097	3.08607	0.00216619	0.0039457	-2.41148	Up
CT55	1.06805	1.40259	3.087	0.00215959	0.00393521	-2.40869	Up
CFHR3	1.06552	2.56939	3.09469	0.0021056	0.00384473	-2.38555	Up
FABP7	1.07258	2.26054	3.09955	0.00207219	0.0037919	-2.37093	Up
BCL2L15	1.05223	10.0705	3.10595	0.00202886	0.00371917	-2.3516	Up
SOHLH1	1.28928	1.51186	3.10655	0.00202483	0.00371253	-2.34979	Up
GHRHR	1.04058	2.94662	3.10987	0.00200276	0.00367566	-2.33976	Up
SYCP2	1.00361	7.08661	3.11293	0.00198256	0.0036411	-2.33049	Up
TMPRSS13	1.33579	6.00251	3.11751	0.00195277	0.00359063	-2.31663	Up
CEACAM7	1.83019	8.41226	3.11888	0.00194388	0.00357536	-2.31246	Up
SSTR5	1.40407	4.04459	3.12719	0.00189102	0.00348259	-2.28722	Up
RHOV	1.20546	7.67272	3.13242	0.00185847	0.00342502	-2.27132	Up
DAO	1.04003	2.15906	3.13461	0.00184497	0.00340216	-2.26465	Up
SEPTIN14	1.15423	1.99458	3.13531	0.00184068	0.00339558	-2.26251	Up
CTAG2	1.95254	1.99184	3.13975	0.00181367	0.00334974	-2.24897	Up
NXF3	1.47923	5.28042	3.14217	0.00179907	0.0033264	-2.24157	Up
HYAL4	1.02716	2.68659	3.14221	0.00179884	0.00332637	-2.24145	Up
KLK1	1.39952	8.62631	3.15019	0.00175158	0.00324407	-2.21706	Up
ZNF488	1.05276	8.25145	3.15146	0.00174417	0.00323169	-2.21317	Up
REG4	2.2859	12.0274	3.15286	0.00173604	0.00321911	-2.20889	Up
DMBT1	2.2351	12.3261	3.15844	0.0017039	0.00316266	-2.19176	Up
CNTNAP2	1.46695	8.70368	3.15865	0.0017027	0.00316075	-2.19111	Up
KIR2DL4	1.02828	4.70012	3.16455	0.00166939	0.00310417	-2.173	Up
SOX14	1.79344	3.67754	3.16553	0.00166392	0.00309493	-2.16999	Up
PRSS3	1.0468	11.4671	3.16767	0.00165198	0.00307478	-2.16338	Up
IL1RL2	1.05247	6.40484	3.16808	0.00164969	0.00307092	-2.16211	Up
MAGEC1	1.64502	1.70028	3.16949	0.00164192	0.00305828	-2.15778	Up
CROCC2	1.10739	3.30816	3.1748	0.00161292	0.00300937	-2.14143	Up
VAX2	1.07142	4.19966	3.17611	0.00160583	0.00299674	-2.13739	Up
FBN3	1.36291	3.96441	3.17903	0.00159013	0.00296893	-2.12837	Up
FGL1	1.62978	3.48466	3.18237	0.0015723	0.00293829	-2.11803	Up
AFF2	1.01574	4.84657	3.18561	0.00155524	0.00290991	-2.10801	Up
TESC	1.22455	10.9604	3.19084	0.00152805	0.00286248	-2.09182	Up
SMIM31	1.68396	7.5082	3.19584	0.00150248	0.00281883	-2.07633	Up
DLL3	1.23784	3.78546	3.19806	0.00149121	0.00279965	-2.06941	Up
HOGA1	1.0658	4.16189	3.20669	0.00144825	0.00272367	-2.04256	Up
PTH2R	1.4841	3.62864	3.20843	0.00143975	0.00270933	-2.03716	Up
DEFB126	1.0704	1.13958	3.21392	0.00141319	0.00266284	-2.02005	Up
MAJIN	1.04084	2.70051	3.21443	0.00141072	0.00265845	-2.01844	Up
LYPD8	1.75917	4.07575	3.22111	0.00137907	0.00260118	-1.99758	Up
GABRQ	1.24075	3.62149	3.22415	0.00136486	0.00257619	-1.98805	Up
SELE	1.14029	8.08799	3.23032	0.00133646	0.00252797	-1.96872	Up
ALDH3B2	1.73134	6.8568	3.24408	0.00127513	0.00242128	-1.9255	Up
MAGEA10	1.8763	2.19681	3.24525	0.00127002	0.00241232	-1.92181	Up
VEPH1	1.07119	6.4042	3.24706	0.00126217	0.00239791	-1.91611	Up
HOXD10	1.60117	3.45091	3.24773	0.00125928	0.00239266	-1.914	Up
MUC5B	2.18432	10.9435	3.2498	0.00125038	0.00237721	-1.90747	Up
KLK10	1.84484	9.58646	3.25478	0.00122921	0.00233839	-1.89175	Up
CDH7	1.15874	2.15284	3.2625	0.00119704	0.00228114	-1.86733	Up
KBTBD11	1.02819	10.0309	3.26405	0.00119068	0.00227018	-1.86243	Up
VNN1	1.54783	10.0099	3.26536	0.00118534	0.00226116	-1.85829	Up
C1QL4	1.15584	2.57032	3.26862	0.00117211	0.00223799	-1.84795	Up
TUBB8B	1.011	2.76318	3.27368	0.00115186	0.0022027	-1.8319	Up
MAGEA8	1.2158	2.11608	3.27979	0.00112782	0.00215939	-1.81247	Up
KRT16	1.9878	6.79695	3.2872	0.00109932	0.0021095	-1.78887	Up
LAMP5	1.12844	6.6324	3.28852	0.0010943	0.00210059	-1.78465	Up
CRTAM	1.02709	5.60728	3.29537	0.00106864	0.00205642	-1.76278	Up
LCE1E	1.03901	1.25394	3.29751	0.00106077	0.00204191	-1.75596	Up
YBX2	1.38726	8.55367	3.29922	0.0010545	0.0020305	-1.7505	Up
TCF24	1.11102	3.24985	3.30595	0.00103012	0.00198742	-1.72892	Up
SERPINA4	1.85263	7.84845	3.31057	0.0010137	0.00195798	-1.7141	Up
AQP6	1.06102	3.93931	3.3133	0.00100413	0.0019413	-1.70534	Up
GALNTL5	1.08383	1.51677	3.31692	0.000991551	0.00191957	-1.69371	Up
C1orf105	1.00283	2.27473	3.32892	0.000950877	0.00184697	-1.65505	Up
TENM4	1.05744	8.57249	3.32896	0.000950745	0.0018469	-1.65492	Up
SLC17A4	1.98703	5.78332	3.33495	0.00093104	0.00181127	-1.63558	Up
KLK4	1.34755	2.71882	3.33807	0.000920936	0.00179311	-1.6255	Up
IKZF3	1.01801	10.4803	3.34663	0.000893687	0.00174479	-1.59776	Up
MLPH	1.16644	11.6766	3.35416	0.000870366	0.00170336	-1.57332	Up
NOS2	1.71027	8.4477	3.35685	0.000862165	0.00168855	-1.56457	Up
COL26A1	1.21296	3.80647	3.36968	0.000824052	0.00161816	-1.52277	Up
NOTUM	1.99262	7.24011	3.37724	0.000802341	0.00157885	-1.49808	Up
ADGRG7	1.87558	7.76664	3.38393	0.000783554	0.00154482	-1.47616	Up
LYZ	1.39469	15.3527	3.38484	0.00078103	0.00154082	-1.47318	Up
PNMA2	1.13487	8.2173	3.38582	0.000778318	0.00153628	-1.46996	Up
SEMG1	1.83173	4.05259	3.38767	0.000773243	0.00152691	-1.4639	Up
KCNA10	1.01152	1.70431	3.38826	0.000771621	0.00152403	-1.46196	Up
PAGE1	1.35415	1.80728	3.39536	0.000752428	0.00148865	-1.43865	Up
MAGEA11	1.90819	2.38034	3.40594	0.000724632	0.00143747	-1.4038	Up
STYXL2	2.18829	4.27356	3.40712	0.000721604	0.00143226	-1.39992	Up
FAM9B	1.0618	1.47159	3.41204	0.000709062	0.00140973	-1.38369	Up
KCNJ10	1.12489	5.96109	3.414	0.000704116	0.00140109	-1.3772	Up
MUC19	1.32176	2.9843	3.41655	0.000697739	0.00138914	-1.36878	Up
CCL26	1.14133	5.19639	3.41699	0.000696656	0.00138743	-1.36734	Up
SIGLEC14	1.53317	6.42079	3.4187	0.000692417	0.00137943	-1.36168	Up
TKTL1	1.79128	3.98923	3.41997	0.000689264	0.00137433	-1.35746	Up
RNF186	1.74181	7.31849	3.42004	0.000689108	0.00137416	-1.35725	Up
CDH16	1.87317	5.45743	3.42399	0.000679436	0.00135662	-1.34415	Up
KCNH8	1.41578	6.6343	3.42604	0.000674475	0.00134729	-1.33736	Up
FRAS1	1.28756	9.93568	3.42704	0.000672073	0.00134306	-1.33405	Up
CD300E	1.11524	6.41317	3.43083	0.000662999	0.00132664	-1.32145	Up
CDX1	2.3799	8.66419	3.43245	0.00065918	0.00131965	-1.3161	Up
SIGLEC15	1.03456	6.69589	3.43336	0.000657015	0.00131565	-1.31305	Up
RBBP8NL	1.25032	8.05487	3.43926	0.000643259	0.00129102	-1.29344	Up
SLC30A2	1.42622	4.4489	3.4396	0.000642475	0.00129014	-1.29231	Up
SFTPB	1.30077	3.91152	3.44151	0.000638095	0.00128217	-1.28596	Up
MYO3B	1.04211	5.0431	3.443	0.000634683	0.00127546	-1.28099	Up
ZG16B	1.35434	9.63001	3.44461	0.000631012	0.00126904	-1.27561	Up
EXOC3L4	1.01758	8.08922	3.44878	0.000621638	0.00125194	-1.26174	Up
TINAG	1.89231	4.97733	3.45163	0.000615282	0.00124048	-1.2522	Up
TREML2	1.33778	5.65193	3.45355	0.000611048	0.00123301	-1.2458	Up
TRIML2	1.18861	1.78225	3.45462	0.000608696	0.00122866	-1.24222	Up
CD177	1.73189	6.98987	3.46562	0.000585026	0.00118447	-1.20542	Up
CXCL2	1.09924	9.99166	3.46926	0.000577369	0.00116986	-1.1932	Up
JPH1	1.32964	9.03093	3.47297	0.000569673	0.0011559	-1.18074	Up
FOXL2NB	1.33421	2.54827	3.48024	0.000554869	0.00112807	-1.1563	Up
FAM166C	1.40074	6.97807	3.48164	0.000552066	0.00112286	-1.1516	Up
LRRC43	1.00397	4.93343	3.48346	0.000548441	0.00111591	-1.14548	Up
ANKRD18A	1.41402	6.34964	3.48384	0.000547672	0.00111453	-1.14418	Up
ASTL	1.04064	3.45958	3.48921	0.000537104	0.00109494	-1.12608	Up
VAX1	1.12285	1.53222	3.49466	0.00052657	0.00107523	-1.10769	Up
GALNT5	1.26532	10.2841	3.49813	0.00051997	0.00106268	-1.09597	Up
KRT9	1.10869	2.1678	3.5004	0.000515688	0.00105451	-1.08829	Up
RFPL2	1.02005	2.28941	3.50663	0.000504104	0.00103263	-1.06718	Up
MMP20	1.16073	2.05839	3.50664	0.000504102	0.00103263	-1.06717	Up
LGALS2	1.37393	9.0636	3.5134	0.000491806	0.00100888	-1.04422	Up
DMRT1	1.08054	1.6701	3.51397	0.000490792	0.00100747	-1.0423	Up
SYT8	1.60181	8.19839	3.51561	0.00048786	0.00100178	-1.03674	Up
PDCD1	1.00157	7.14486	3.51569	0.000487709	0.00100158	-1.03645	Up
BPIFB4	1.21458	1.88686	3.51797	0.000483658	0.000994029	-1.0287	Up
ZNF683	1.22003	6.56226	3.52317	0.000474549	0.000977041	-1.01102	Up
SAMD5	1.14294	10.525	3.53496	0.000454476	0.000939439	-0.970825	Up
PPP1R1B	1.95663	11.6067	3.54261	0.000441868	0.000915204	-0.944654	Up
KCNS1	1.45783	4.56642	3.54287	0.000441454	0.000914506	-0.94378	Up
EFCAB8	1.12983	3.88804	3.54524	0.000437627	0.000907326	-0.935679	Up
C17orf99	1.02201	3.08405	3.55259	0.000425931	0.000884849	-0.910471	Up
CYP4F8	1.16921	2.35106	3.55808	0.000417389	0.000867974	-0.891615	Up
NPM2	1.04914	5.88862	3.55935	0.000415447	0.000864128	-0.887274	Up
C9	1.06647	2.18086	3.56872	0.000401303	0.000836202	-0.855025	Up
SYT14	1.35915	4.16277	3.57322	0.000394668	0.000823479	-0.839497	Up
DPPA2	1.26908	1.41525	3.5763	0.000390191	0.000814777	-0.828873	Up
UPK3A	1.70939	4.48281	3.5778	0.000388029	0.000810717	-0.823698	Up
MAT1A	1.73004	4.65322	3.57797	0.000387781	0.00081029	-0.823102	Up
TMPRSS7	1.01278	3.54865	3.58357	0.000379813	0.000794618	-0.80376	Up
FOXJ1	2.11682	7.21841	3.58365	0.000379702	0.000794476	-0.803489	Up
GREB1	1.0113	7.76019	3.58427	0.000378822	0.000792901	-0.801327	Up
PRSS41	1.54797	2.90141	3.58472	0.000378196	0.000791682	-0.799788	Up
SLC36A2	1.01442	1.88714	3.58916	0.000372006	0.000780212	-0.78441	Up
MAGEA1	2.24183	2.40641	3.5922	0.000367822	0.000772132	-0.77387	Up
AIM2	1.27388	6.92119	3.59937	0.000358134	0.000752813	-0.748995	Up
F2	1.53318	3.58883	3.60069	0.000356379	0.000749485	-0.744416	Up
CFAP107	1.07261	1.67269	3.60699	0.0003481	0.00073354	-0.722503	Up
TRIM36	1.04374	8.17213	3.61028	0.000343843	0.000725799	-0.71103	Up
PKD1L3	1.1193	4.3434	3.61727	0.000334984	0.000708061	-0.686689	Up
NLRP5	1.25299	1.66048	3.61838	0.000333595	0.000705366	-0.682815	Up
MUC1	1.29038	14.2822	3.61923	0.000332525	0.000703342	-0.679818	Up
AGXT	1.38367	3.88788	3.61949	0.00033221	0.000702835	-0.678933	Up
EN2	2.00856	4.04012	3.6211	0.000330207	0.000698917	-0.673295	Up
RETN	1.14563	2.92164	3.62124	0.000330041	0.000698643	-0.672824	Up
P2RX5	1.09879	6.45863	3.6228	0.000328112	0.000694876	-0.667357	Up
BTNL9	1.04619	8.70802	3.62392	0.000326741	0.000692209	-0.663452	Up
TCF23	1.39504	3.73004	3.6268	0.000323227	0.000685308	-0.653363	Up
LHFPL3	1.66043	4.5575	3.62681	0.000323222	0.000685308	-0.653349	Up
COL9A1	1.4732	7.22433	3.62797	0.000321821	0.000682561	-0.649298	Up
RAB39A	1.03676	5.04307	3.62841	0.000321285	0.000681579	-0.647742	Up
PRSS21	2.18277	6.83751	3.62952	0.000319945	0.000678891	-0.643843	Up
INHBB	1.09671	8.74572	3.63017	0.000319173	0.000677484	-0.641589	Up
PTCH2	1.13024	7.61386	3.63018	0.000319156	0.000677484	-0.641539	Up
LYPD4	1.19759	1.89815	3.63106	0.000318104	0.000675522	-0.638458	Up
SEPTIN3	1.11964	7.26561	3.63388	0.000314751	0.000668973	-0.628573	Up
DLX6	1.91593	4.36859	3.6339	0.000314731	0.000668973	-0.628511	Up
SLC19A3	1.76763	8.09344	3.64644	0.000300238	0.000639989	-0.584515	Up
SPATA21	1.09128	3.17056	3.64727	0.000299295	0.000638342	-0.581577	Up
KCND2	1.17322	5.54108	3.64737	0.00029918	0.00063817	-0.581218	Up
PLPPR3	1.16397	3.3755	3.65055	0.000295625	0.000631093	-0.57006	Up
KRT39	1.13887	1.93923	3.65361	0.000292229	0.000624414	-0.559271	Up
NUP210	1.08976	11.6137	3.65619	0.000289395	0.000618573	-0.550174	Up
KLC3	1.50116	5.42147	3.65944	0.000285873	0.000611464	-0.538738	Up
GYG2	1.09429	8.69456	3.66765	0.000277133	0.000594066	-0.50974	Up
ERV3-1	1.01922	10.1692	3.66797	0.000276799	0.000593622	-0.508612	Up
TNFRSF11A	1.10573	10.7503	3.6686	0.000276137	0.000592339	-0.506376	Up
CGB7	1.08349	3.01183	3.6703	0.000274366	0.000589031	-0.500364	Up
PON1	1.57774	3.61935	3.67188	0.000272725	0.000585761	-0.494761	Up
PI15	1.50973	7.92059	3.67393	0.000270619	0.000581773	-0.487519	Up
UNC5A	1.48504	6.29539	3.67753	0.000266947	0.000574676	-0.474756	Up
MYH1	1.26488	2.02765	3.67788	0.000266595	0.000573984	-0.473522	Up
SLC6A18	1.09692	1.55337	3.67895	0.000265512	0.000571916	-0.469718	Up
SH2D1A	1.08574	6.9117	3.70107	0.000244086	0.000528083	-0.391073	Up
EXD1	1.13854	2.27871	3.71059	0.000235381	0.000510198	-0.357115	Up
AIRE	1.28469	3.22265	3.71463	0.000231773	0.00050308	-0.342668	Up
ZDHHC11	1.12165	7.57965	3.71803	0.000228775	0.000497092	-0.330486	Up
TMEM119	1.00014	10.1028	3.71807	0.000228742	0.000497078	-0.330352	Up
TNNI2	1.13317	5.41255	3.72043	0.000226681	0.000493003	-0.321887	Up
FOXC2	1.11052	6.59585	3.72284	0.000224599	0.000488701	-0.313251	Up
RSPH14	1.10063	4.68269	3.72571	0.000222147	0.000483763	-0.302983	Up
KRTAP5-5	1.4081	2.19883	3.72674	0.00022127	0.000482021	-0.29928	Up
KIR2DL3	1.03931	2.72104	3.72822	0.000220021	0.00047958	-0.293983	Up
THEM5	1.18223	6.07481	3.73201	0.000216837	0.000472972	-0.280342	Up
RASGRF1	1.0902	6.43236	3.73602	0.000213529	0.000466248	-0.265956	Up
WFDC10B	1.15865	2.26492	3.73676	0.00021292	0.000465081	-0.26328	Up
MAGEA2B	1.10365	1.06641	3.73829	0.00021167	0.000462568	-0.25777	Up
LRP2	1.7428	4.16469	3.74024	0.000210089	0.000459275	-0.250754	Up
CABP4	1.15984	5.87174	3.74329	0.000207638	0.000454342	-0.239765	Up
SEMG2	1.60651	2.0502	3.74928	0.000202904	0.000444658	-0.218175	Up
ATP10B	1.64886	11.2567	3.75476	0.00019866	0.000436079	-0.198381	Up
KASH5	1.35474	2.53943	3.75638	0.000197423	0.000433466	-0.192532	Up
CEACAM16	1.14288	2.81762	3.7574	0.000196646	0.000432066	-0.188839	Up
CLPSL1	1.47711	2.35108	3.75847	0.000195837	0.000430591	-0.184975	Up
TEKT1	1.03423	2.15165	3.75933	0.000195184	0.000429207	-0.18185	Up
PNPLA3	1.45844	5.31614	3.76312	0.000192349	0.000423572	-0.168143	Up
LIPM	1.12542	6.10135	3.76577	0.000190387	0.000419649	-0.158542	Up
ERVMER34-1	1.52903	7.06809	3.76973	0.000187496	0.000413716	-0.144206	Up
PLPP4	1.54837	5.42934	3.77549	0.00018336	0.000405214	-0.123308	Up
MFAP3L	1.16315	7.89863	3.77678	0.000182444	0.000403333	-0.118615	Up
A1CF	2.03023	8.23471	3.77714	0.000182188	0.000402815	-0.1173	Up
C2CD6	1.15193	4.22123	3.77934	0.000180639	0.000399626	-0.109296	Up
MAGEA4	2.87915	2.97774	3.78474	0.000176897	0.000391626	-0.0896757	Up
TTC24	1.20295	3.64276	3.7904	0.000173042	0.000383686	-0.0690276	Up
POU3F2	1.08145	2.45748	3.79191	0.000172032	0.000381672	-0.0635381	Up
DDX4	1.39492	2.14041	3.79283	0.000171414	0.000380392	-0.0601646	Up
RASSF6	1.06751	10.875	3.79295	0.000171336	0.000380263	-0.059735	Up
SLC22A9	1.28002	2.49062	3.80272	0.000164939	0.000367597	-0.0240585	Up
ERVH48-1	1.02022	4.04688	3.80563	0.000163078	0.000363668	-0.0134203	Up
KISS1R	1.39189	3.89453	3.80935	0.000160727	0.000358769	0.000197486	Up
ERBB2	1.16165	13.9426	3.81119	0.000159578	0.000356374	0.00692781	Up
AKR7L	1.15997	7.89857	3.81843	0.000155122	0.000346713	0.0334956	Up
CRYBG2	1.33034	9.63489	3.82605	0.000150566	0.000337096	0.0614641	Up
SGPP2	1.01138	11.7298	3.82654	0.000150274	0.000336484	0.0632832	Up
CFTR	1.84978	10.3186	3.82954	0.000148519	0.000332754	0.0743065	Up
SAGE1	1.94368	2.24373	3.83318	0.000146414	0.000328233	0.087707	Up
C6orf15	1.92176	2.35605	3.83588	0.000144866	0.000325129	0.0976769	Up
SCN8A	1.19317	7.57221	3.83624	0.000144661	0.000324772	0.0990118	Up
PODXL2	1.3222	10.8037	3.83653	0.0001445	0.00032449	0.100052	Up
NXPH1	1.24869	1.775	3.83795	0.000143696	0.000322879	0.105291	Up
CXCL13	1.67778	9.30565	3.84021	0.000142421	0.000320245	0.113657	Up
DPYS	1.19269	2.4589	3.84068	0.000142159	0.000319694	0.115389	Up
SPINK1	1.96654	12.7292	3.84194	0.000141461	0.000318202	0.120006	Up
RETREG1	1.1415	10.3878	3.84461	0.00013998	0.000315175	0.129886	Up
KLK3	1.42479	2.66139	3.84491	0.000139818	0.000314848	0.130972	Up
SERPINE3	1.06096	3.96942	3.84706	0.000138639	0.000312494	0.138927	Up
RAD51AP2	1.22788	2.54473	3.85058	0.000136726	0.000308482	0.151968	Up
VCX	1.41989	1.652	3.8515	0.000136232	0.000307442	0.155367	Up
HRG	1.07591	1.84941	3.85164	0.000136157	0.00030731	0.155884	Up
GALNT6	1.02239	11.5041	3.85345	0.00013519	0.000305239	0.162574	Up
AMN	1.28782	11.002	3.85369	0.000135064	0.000305007	0.163453	Up
KLK2	1.19734	2.37058	3.85653	0.000133557	0.000301733	0.17399	Up
GBP7	1.16183	3.46278	3.865	0.000129164	0.000292447	0.2054	Up
APOA2	2.07204	3.42818	3.86502	0.000129158	0.000292447	0.205445	Up
LEFTY1	2.27196	5.32228	3.86914	0.000127068	0.00028791	0.220771	Up
PLEKHG6	1.05062	10.8674	3.87095	0.000126163	0.000286069	0.227484	Up
LPO	1.29122	3.46116	3.87568	0.000123824	0.000280936	0.245068	Up
ZNF99	1.18661	3.03983	3.87909	0.000122162	0.000277402	0.257761	Up
TFR2	1.29397	8.2405	3.88003	0.000121704	0.000276429	0.261292	Up
GRB14	1.30023	7.21218	3.88167	0.000120916	0.000274874	0.267397	Up
TENT5D	1.19337	1.59118	3.88453	0.000119551	0.000272003	0.278065	Up
ANK1	1.25452	8.19533	3.88489	0.000119382	0.00027165	0.279399	Up
SYCP2L	1.36738	3.9969	3.89239	0.000115877	0.000264386	0.307402	Up
PDE11A	1.31584	6.99828	3.89593	0.000114258	0.000261075	0.320631	Up
TMEM184A	1.0663	10.6256	3.89625	0.000114113	0.000260776	0.321822	Up
PDZK1IP1	1.62013	11.7236	3.89745	0.000113569	0.000259627	0.32632	Up
IL22RA1	1.2525	10.228	3.89892	0.000112907	0.00025824	0.331815	Up
AGR3	1.94171	10.432	3.89903	0.000112857	0.000258158	0.332231	Up
ODAD1	1.07504	4.46819	3.90085	0.000112044	0.000256393	0.339029	Up
CGREF1	1.22952	9.09156	3.90174	0.000111649	0.00025567	0.342345	Up
C4orf19	1.06123	9.78972	3.90209	0.00011149	0.000255344	0.343688	Up
SCART1	1.01991	6.89854	3.90292	0.000111122	0.00025469	0.346793	Up
GJB7	1.6617	3.54632	3.90478	0.000110303	0.000252986	0.353747	Up
C7orf57	1.27396	3.93056	3.90836	0.000108741	0.000249632	0.367158	Up
CAPN8	1.64748	10.789	3.90886	0.000108525	0.000249258	0.369032	Up
WFDC3	1.01439	5.16455	3.91331	0.000106611	0.000245165	0.385763	Up
ERVV-2	1.40215	1.75862	3.91385	0.000106382	0.000244728	0.387788	Up
NALCN	1.37705	6.11527	3.91547	0.000105698	0.000243334	0.393858	Up
DNM1	1.0203	10.1714	3.91731	0.000104923	0.0002417	0.400777	Up
CCN6	1.43952	6.34346	3.91869	0.000104344	0.000240515	0.40598	Up
TBC1D3L	1.18421	4.34879	3.92524	0.000101648	0.000234765	0.430608	Up
ZNF474	1.01358	3.80432	3.92799	0.000100533	0.000232392	0.440981	Up
KIR2DS4	1.28592	2.71063	3.93958	9.59696e-05	0.00022281	0.484695	Up
FAM83E	1.26339	10.733	3.94428	9.41731e-05	0.000218857	0.502481	Up
NUTM2B	1.01176	3.27464	3.94455	9.40715e-05	0.000218675	0.503497	Up
ZBP1	1.02375	8.07923	3.94503	9.3891e-05	0.00021831	0.505305	Up
H2AW	1.16573	8.41507	3.94647	9.33504e-05	0.000217107	0.51074	Up
MYBPH	1.03372	2.05586	3.94983	9.20974e-05	0.000214434	0.52346	Up
EGR4	1.54803	4.84343	3.95713	8.94294e-05	0.000208639	0.551137	Up
CCDC175	1.33962	1.98652	3.95786	8.91663e-05	0.000208129	0.553911	Up
SIRPG	1.17119	7.49325	3.95956	8.85571e-05	0.000206837	0.560366	Up
DNAI2	1.11669	2.53007	3.9665	8.61104e-05	0.00020145	0.586749	Up
OBP2B	1.49686	1.76643	3.96703	8.59276e-05	0.000201073	0.588749	Up
CEACAM6	2.19652	13.5023	3.9672	8.58699e-05	0.000200967	0.589382	Up
ASB15	1.29404	1.90649	3.96752	8.57591e-05	0.000200805	0.590599	Up
CALHM6	1.11383	7.94685	3.96935	8.51251e-05	0.00019942	0.597587	Up
SELL	1.12132	9.46564	3.97001	8.48999e-05	0.000198943	0.600082	Up
FADS2	1.04979	11.0085	3.97272	8.39755e-05	0.000197	0.610393	Up
SPEF1	1.12846	3.85788	3.97918	8.18082e-05	0.000192399	0.635024	Up
SLFN13	1.17767	9.97433	3.97982	8.15957e-05	0.000191924	0.637473	Up
NECTIN4	1.33761	9.43683	3.98214	8.08333e-05	0.000190275	0.646318	Up
KRT36	1.06523	2.47669	3.98682	7.9314e-05	0.00018684	0.664195	Up
TM4SF5	1.69576	9.35532	3.98853	7.87674e-05	0.000185646	0.67071	Up
ASB18	1.13518	1.61614	3.99007	7.82764e-05	0.000184582	0.676602	Up
MORN3	1.06671	5.96973	3.99202	7.76597e-05	0.000183248	0.684056	Up
MYO7B	1.95854	10.8027	3.995	7.67273e-05	0.00018125	0.695439	Up
CPZ	1.16529	5.41718	3.99562	7.65315e-05	0.000180834	0.697847	Up
H3C7	1.13003	2.86109	3.99627	7.63322e-05	0.000180408	0.700305	Up
RAC3	1.05292	8.06465	3.9983	7.57044e-05	0.000179152	0.708087	Up
GP6	1.09897	4.63476	4.0027	7.43624e-05	0.000176222	0.724946	Up
ATP2C2	1.53994	9.91201	4.00336	7.41637e-05	0.000175796	0.727467	Up
KRTAP5-9	1.08157	2.57192	4.00496	7.36816e-05	0.000174756	0.733615	Up
AMIGO2	1.07662	9.68244	4.00906	7.2461e-05	0.000172066	0.749363	Up
KLK8	2.32743	4.96081	4.00985	7.22277e-05	0.000171578	0.752402	Up
UBASH3A	1.02816	6.8717	4.01153	7.17368e-05	0.000170498	0.758832	Up
ZC3H12D	1.06375	8.605	4.01171	7.16817e-05	0.000170389	0.759556	Up
DACT1	1.07345	9.5757	4.01557	7.05629e-05	0.000167944	0.774388	Up
WFDC10A	1.12759	1.27597	4.01709	7.0128e-05	0.000166973	0.780217	Up
C9orf152	1.47341	10.6708	4.01866	6.96808e-05	0.000165993	0.786249	Up
ITGB6	1.402	10.7482	4.02065	6.91171e-05	0.000164692	0.793908	Up
RAB3B	1.36476	8.8442	4.02149	6.88789e-05	0.000164208	0.797164	Up
RBM44	1.01819	5.10438	4.02345	6.8331e-05	0.000163069	0.804695	Up
MAGEA2	1.3713	1.32598	4.02506	6.78826e-05	0.000162165	0.810904	Up
PIWIL3	1.41678	2.1249	4.02591	6.76479e-05	0.000161625	0.81417	Up
SCIMP	1.05998	8.37902	4.02644	6.74995e-05	0.000161291	0.816242	Up
ADORA2B	1.05722	7.87095	4.02874	6.68691e-05	0.000159887	0.825092	Up
UNC5CL	1.41758	9.97877	4.03026	6.64527e-05	0.000158973	0.830984	Up
TRIM71	1.88365	3.19124	4.0309	6.62795e-05	0.00015864	0.833445	Up
ALOXE3	1.32843	4.37062	4.03121	6.61973e-05	0.000158484	0.834615	Up
ZNF385C	1.08768	6.08612	4.037	6.46446e-05	0.000154946	0.857004	Up
ARRDC5	1.14568	4.86082	4.03977	6.39149e-05	0.000153295	0.867714	Up
MEIOSIN	1.23927	2.08686	4.04091	6.36169e-05	0.00015264	0.872123	Up
TAC4	1.00264	3.63432	4.05221	6.07331e-05	0.000146247	0.915895	Up
IFNL1	1.24905	2.42461	4.05286	6.05733e-05	0.000145919	0.918382	Up
AK4P3	1.20814	2.74989	4.05401	6.02856e-05	0.00014532	0.922875	Up
LIN28A	1.20195	2.41827	4.05622	5.97402e-05	0.000144098	0.931451	Up
OLFM2	1.08033	8.99535	4.05754	5.94169e-05	0.000143393	0.936573	Up
PRSS37	1.01154	1.83193	4.05757	5.94112e-05	0.000143393	0.936664	Up
LTB	1.18559	9.19588	4.06074	5.86416e-05	0.000141705	0.948971	Up
SHOC1	1.06062	5.70161	4.06248	5.82222e-05	0.000140801	0.955745	Up
TTC6	1.33994	6.19791	4.06462	5.77115e-05	0.000139639	0.964061	Up
DDN	1.3299	4.58901	4.06535	5.75366e-05	0.000139252	0.966926	Up
ANKLE1	1.03765	5.18298	4.06739	5.70566e-05	0.000138162	0.974835	Up
HOXD12	1.19424	1.3244	4.06781	5.6957e-05	0.000137974	0.976484	Up
DDC	1.93065	9.67717	4.07523	5.52407e-05	0.000134148	1.00537	Up
IGFN1	1.76241	4.13197	4.07561	5.51538e-05	0.000133989	1.00686	Up
ZNF716	1.66789	2.08924	4.07608	5.50466e-05	0.000133746	1.00869	Up
HAL	1.24527	5.53871	4.07678	5.48869e-05	0.000133428	1.01144	Up
COL6A6	1.16932	4.54578	4.08478	5.3103e-05	0.000129344	1.04264	Up
CST5	1.2481	2.34366	4.08737	5.25358e-05	0.000128147	1.05278	Up
CATSPER1	1.00844	4.65284	4.09143	5.16593e-05	0.000126207	1.06867	Up
EFCAB12	1.02732	5.23229	4.09348	5.12224e-05	0.000125189	1.0767	Up
KRTAP5-8	1.05287	2.25904	4.09367	5.11823e-05	0.000125107	1.07743	Up
EVPL	1.20635	11.9276	4.09488	5.09268e-05	0.000124511	1.08216	Up
SBK1	1.36689	8.10518	4.09605	5.06806e-05	0.000123962	1.08674	Up
ZNF556	1.44463	5.12894	4.09915	5.0034e-05	0.000122509	1.09887	Up
TBX4	1.79782	3.68991	4.09952	4.99574e-05	0.000122337	1.10032	Up
ST8SIA2	1.33953	4.5258	4.10036	4.97823e-05	0.000121963	1.10363	Up
CSF3R	1.10486	9.53572	4.10094	4.96636e-05	0.00012173	1.10589	Up
CCDC83	1.1373	2.04502	4.10235	4.93729e-05	0.00012109	1.11144	Up
HSPA6	1.12964	7.51326	4.10486	4.88605e-05	0.000119888	1.12129	Up
CFAP97D1	1.02161	2.16209	4.10584	4.86628e-05	0.000119465	1.12512	Up
SLC35F4	1.05834	2.418	4.10961	4.79063e-05	0.000117696	1.13993	Up
NME8	1.0543	3.7202	4.10962	4.79035e-05	0.000117696	1.13998	Up
ACSM3	1.18814	9.29038	4.11064	4.77012e-05	0.000117244	1.14398	Up
DSPP	1.23093	1.53147	4.11197	4.74382e-05	0.000116628	1.14921	Up
CCR5	1.10135	8.38344	4.11476	4.68907e-05	0.000115343	1.16018	Up
CRX	1.35072	3.11477	4.11599	4.66512e-05	0.000114784	1.16502	Up
TNFAIP6	1.17786	8.06561	4.12839	4.43013e-05	0.000109406	1.21387	Up
KIAA0319	1.30056	5.33343	4.13191	4.3655e-05	0.000107896	1.22776	Up
KCNK9	1.58558	5.55528	4.13192	4.36538e-05	0.000107896	1.22779	Up
GALNT4	1.08328	7.8019	4.13699	4.27377e-05	0.000105755	1.24784	Up
TRAPPC3L	1.1279	2.75246	4.13734	4.26753e-05	0.000105615	1.24922	Up
FOXA1	1.47485	11.235	4.13805	4.25486e-05	0.000105357	1.25203	Up
HECW1	1.04305	6.00556	4.13882	4.24118e-05	0.000105046	1.25508	Up
DCDC1	1.27862	3.62286	4.13964	4.22675e-05	0.000104731	1.2583	Up
CABYR	1.07248	6.55173	4.14247	4.177e-05	0.000103567	1.2695	Up
CASP5	1.6357	5.55507	4.14862	4.07073e-05	0.00010108	1.29387	Up
LTBP2	1.03941	12.5149	4.15279	4.00022e-05	9.93949e-05	1.31039	Up
OTULINL	1.06796	9.88726	4.15361	3.98645e-05	9.90959e-05	1.31365	Up
KCNJ11	1.04099	7.35992	4.15397	3.98048e-05	9.89837e-05	1.31507	Up
VRTN	1.8326	4.44692	4.15528	3.95868e-05	9.84942e-05	1.32027	Up
FBN2	1.15557	8.14204	4.156	3.94667e-05	9.82346e-05	1.32314	Up
FER1L5	1.10816	4.60042	4.15691	3.93164e-05	9.78866e-05	1.32675	Up
GPR158	1.83317	6.72391	4.15916	3.8947e-05	9.69929e-05	1.33568	Up
SPTA1	1.23402	2.88922	4.1602	3.87772e-05	9.66217e-05	1.33981	Up
LRRC74A	1.05011	2.81374	4.16042	3.8742e-05	9.65468e-05	1.34067	Up
CPN1	1.83569	2.08995	4.16056	3.87182e-05	9.65004e-05	1.34125	Up
GJB5	2.22046	5.86773	4.16486	3.80251e-05	9.48744e-05	1.35834	Up
RAET1L	1.87178	4.5504	4.16699	3.76868e-05	9.40807e-05	1.3668	Up
IFNK	1.00543	1.76069	4.17038	3.71524e-05	9.28211e-05	1.38031	Up
FAM9C	1.31674	1.86711	4.17083	3.70829e-05	9.26723e-05	1.38208	Up
ZSCAN10	1.39274	2.1996	4.17116	3.70317e-05	9.25818e-05	1.38339	Up
SIRPD	1.05797	2.24569	4.17142	3.69903e-05	9.24906e-05	1.38445	Up
LZTS3	1.14989	11.0741	4.17189	3.6918e-05	9.23594e-05	1.3863	Up
CXCL5	2.78875	10.2704	4.17526	3.63966e-05	9.11406e-05	1.39976	Up
ZNF93	1.00495	8.29717	4.17638	3.62261e-05	9.07381e-05	1.4042	Up
ADAMTS20	1.81072	2.29576	4.17895	3.58359e-05	8.98211e-05	1.41445	Up
PLG	1.18362	1.83694	4.18113	3.55073e-05	8.90932e-05	1.42317	Up
PRND	1.54815	5.56907	4.18223	3.53442e-05	8.87197e-05	1.42753	Up
HOXA1	1.12254	7.19695	4.18231	3.5331e-05	8.86986e-05	1.42788	Up
ALPK2	1.33277	6.4662	4.18556	3.48509e-05	8.75673e-05	1.44083	Up
MYH4	1.60549	2.23917	4.18705	3.4632e-05	8.70844e-05	1.4468	Up
ARHGEF35	1.19156	7.71933	4.18855	3.4413e-05	8.65923e-05	1.4528	Up
DOK5	1.06312	6.57192	4.19108	3.40473e-05	8.57076e-05	1.46291	Up
SHH	1.68717	8.67097	4.19155	3.39798e-05	8.55714e-05	1.46479	Up
LY75-CD302	1.09037	2.04903	4.19333	3.3725e-05	8.49527e-05	1.47192	Up
POU5F2	1.02811	4.59984	4.19459	3.35457e-05	8.45582e-05	1.47696	Up
OMP	1.06933	3.8032	4.19508	3.34762e-05	8.43944e-05	1.47893	Up
AKR1C4	1.76635	5.4493	4.19604	3.33409e-05	8.40938e-05	1.48276	Up
MEIG1	1.01816	3.34841	4.19786	3.30845e-05	8.34859e-05	1.49007	Up
SLC4A8	1.08702	7.71245	4.20084	3.26708e-05	8.25313e-05	1.50198	Up
TMSB15B	1.13015	4.18028	4.20234	3.24641e-05	8.20426e-05	1.50799	Up
PAX2	1.63264	2.53349	4.20365	3.22836e-05	8.15976e-05	1.51327	Up
ATG9B	1.15775	7.55146	4.20464	3.21494e-05	8.12913e-05	1.51722	Up
ZNF878	1.15476	4.14635	4.20601	3.19632e-05	8.08314e-05	1.52272	Up
DAW1	1.40869	2.77204	4.2063	3.19237e-05	8.07536e-05	1.52389	Up
CD70	1.22383	6.12144	4.20814	3.16757e-05	8.01588e-05	1.53127	Up
CA13	1.02238	9.83409	4.21313	3.10115e-05	7.87024e-05	1.55134	Up
PRSS16	1.12342	9.70121	4.21702	3.05043e-05	7.75101e-05	1.56696	Up
H2BC10	1.079	2.65656	4.22032	3.00798e-05	7.65358e-05	1.58023	Up
ANTXR1	1.09584	12.8393	4.22089	3.00058e-05	7.63892e-05	1.58257	Up
LHX9	1.4849	2.19367	4.22379	2.96383e-05	7.55257e-05	1.59424	Up
CFHR4	1.43541	1.59083	4.22659	2.92874e-05	7.46724e-05	1.60552	Up
TRIM72	1.70084	4.94866	4.22742	2.91849e-05	7.44315e-05	1.60884	Up
GRK7	1.12655	2.56247	4.24377	2.72197e-05	6.96196e-05	1.67489	Up
LRIT3	1.0476	3.54229	4.24729	2.68134e-05	6.86462e-05	1.68915	Up
DRGX	2.07156	3.52222	4.24895	2.66245e-05	6.82002e-05	1.69585	Up
SLC6A1	1.05221	6.29892	4.24896	2.66231e-05	6.82002e-05	1.6959	Up
ATP7B	1.18116	10.6835	4.25082	2.64117e-05	6.76828e-05	1.70346	Up
IL1A	1.59678	5.78504	4.25382	2.60756e-05	6.68769e-05	1.71559	Up
HID1	1.03244	12.7405	4.25564	2.58736e-05	6.64136e-05	1.72296	Up
RP1	1.53181	2.77645	4.25609	2.58237e-05	6.62946e-05	1.72479	Up
KYNU	1.18037	9.2398	4.25947	2.54521e-05	6.54126e-05	1.73854	Up
LRRC75A	1.00713	9.18341	4.26139	2.52441e-05	6.49227e-05	1.74632	Up
ZNF703	1.11504	12.8956	4.26321	2.5048e-05	6.4454e-05	1.75371	Up
SLC24A2	1.51871	4.86885	4.26373	2.49918e-05	6.4345e-05	1.75584	Up
AKAP4	1.32916	1.54721	4.26488	2.48693e-05	6.40663e-05	1.76049	Up
CEACAM1	1.16643	12.0733	4.26528	2.48266e-05	6.39728e-05	1.76212	Up
GARIN1B	1.18737	1.74791	4.26821	2.45161e-05	6.32074e-05	1.77406	Up
SCARF2	1.11513	10.2999	4.26936	2.43961e-05	6.29156e-05	1.77871	Up
SDC1	1.09835	13.6592	4.27187	2.41343e-05	6.2275e-05	1.78894	Up
OR51E1	1.06699	6.4414	4.2768	2.3629e-05	6.10639e-05	1.80901	Up
ASS1	1.2162	13.027	4.27683	2.3626e-05	6.10639e-05	1.80912	Up
WDR87	1.50588	2.87367	4.27885	2.34219e-05	6.05791e-05	1.81735	Up
CLEC6A	1.36025	2.6672	4.27908	2.33988e-05	6.05278e-05	1.81829	Up
EBF2	1.38652	6.33172	4.28191	2.31151e-05	5.98437e-05	1.82986	Up
TRIM29	2.23876	10.7606	4.28329	2.29784e-05	5.95146e-05	1.83548	Up
FBXO39	1.18012	4.07268	4.28332	2.29752e-05	5.95146e-05	1.83561	Up
DCDC2	2.16877	6.68321	4.28368	2.294e-05	5.94401e-05	1.83707	Up
PRSS48	1.07347	3.82027	4.28577	2.2735e-05	5.89826e-05	1.84558	Up
GZMB	1.30346	8.56835	4.29032	2.22935e-05	5.795e-05	1.86419	Up
PROX2	1.05755	4.64026	4.29421	2.19229e-05	5.70583e-05	1.88009	Up
PADI2	1.37195	9.48457	4.29728	2.16345e-05	5.6347e-05	1.89265	Up
NMU	1.8	7.8221	4.29763	2.16018e-05	5.62776e-05	1.89409	Up
ANXA13	2.23182	8.78078	4.29938	2.14396e-05	5.58785e-05	1.90123	Up
SLC12A2	1.12099	13.3391	4.30079	2.13095e-05	5.55471e-05	1.90701	Up
MYH7B	1.1115	7.35617	4.30183	2.12141e-05	5.5314e-05	1.91127	Up
ITGB2	1.10548	11.6105	4.30218	2.11821e-05	5.52536e-05	1.9127	Up
GPR141	1.23259	5.04654	4.30339	2.10717e-05	5.49809e-05	1.91766	Up
HGD	1.79471	9.14809	4.30351	2.10608e-05	5.49602e-05	1.91815	Up
PCDHB8	1.7279	5.92527	4.30435	2.09843e-05	5.47761e-05	1.9216	Up
OSR2	1.05895	8.96071	4.30529	2.08988e-05	5.45758e-05	1.92548	Up
C8orf74	1.52865	3.04576	4.30861	2.06013e-05	5.3844e-05	1.93908	Up
CGB5	1.85397	1.99476	4.31012	2.04672e-05	5.3516e-05	1.94528	Up
CPSF4L	1.06845	3.27427	4.31108	2.03827e-05	5.33252e-05	1.9492	Up
EPHA2	1.0519	12.7078	4.31219	2.02843e-05	5.30901e-05	1.95379	Up
C5orf47	1.14009	1.63527	4.31291	2.02221e-05	5.29495e-05	1.95671	Up
STAG3	1.02291	7.87884	4.31517	2.00245e-05	5.24691e-05	1.96603	Up
BECN2	1.2233	1.69733	4.31762	1.98135e-05	5.19746e-05	1.97608	Up
GRAMD2A	1.29691	6.73126	4.31797	1.97832e-05	5.19096e-05	1.97754	Up
GRHL1	1.14381	9.11986	4.32156	1.94781e-05	5.12071e-05	1.99229	Up
PGBD5	1.27171	7.3302	4.32366	1.9302e-05	5.07901e-05	2.00091	Up
OPLAH	1.00865	11.1883	4.32726	1.90028e-05	5.0045e-05	2.01574	Up
SP140	1.12022	8.1396	4.32747	1.89851e-05	5.00055e-05	2.01662	Up
C11orf53	1.8887	6.16071	4.32953	1.88163e-05	4.95819e-05	2.0251	Up
ASGR1	1.18263	6.46604	4.33396	1.84582e-05	4.87141e-05	2.04334	Up
MYADML2	1.69792	3.82075	4.3359	1.83027e-05	4.83515e-05	2.05138	Up
AANAT	1.05858	3.66565	4.33918	1.80441e-05	4.77292e-05	2.06489	Up
C12orf42	1.30151	3.86073	4.33931	1.80338e-05	4.77089e-05	2.06543	Up
FOSL1	1.27009	9.99317	4.33969	1.80039e-05	4.76433e-05	2.067	Up
PKHD1	1.94484	6.10136	4.34086	1.79125e-05	4.74148e-05	2.07184	Up
LAMA3	1.28352	12.3843	4.34546	1.75575e-05	4.65281e-05	2.09084	Up
ITIH2	1.89118	5.05748	4.34639	1.74863e-05	4.63656e-05	2.0947	Up
CYP24A1	2.03634	4.03988	4.34724	1.74219e-05	4.6208e-05	2.09821	Up
CCL22	1.2416	8.30244	4.35117	1.71262e-05	4.5482e-05	2.11446	Up
BPIFA2	1.98587	2.72965	4.35122	1.71222e-05	4.54778e-05	2.11469	Up
OLAH	1.32186	3.06635	4.35431	1.68932e-05	4.48825e-05	2.12747	Up
ST6GAL1	1.06817	12.4575	4.35467	1.68668e-05	4.48187e-05	2.12896	Up
SMIM36	1.0575	1.27792	4.36033	1.64551e-05	4.37997e-05	2.15243	Up
LILRA6	1.0424	6.52029	4.36222	1.63199e-05	4.34708e-05	2.16027	Up
KRTAP5-10	1.14573	2.05329	4.36379	1.6208e-05	4.32097e-05	2.1668	Up
PARP15	1.28133	7.74956	4.36506	1.61184e-05	4.29894e-05	2.17207	Up
TMEM150B	1.43274	8.54064	4.36699	1.59834e-05	4.26414e-05	2.18006	Up
SRPX2	1.02308	8.99124	4.36961	1.58013e-05	4.21858e-05	2.19095	Up
C5AR1	1.06585	10.0829	4.37111	1.56976e-05	4.19209e-05	2.1972	Up
PROSER2	1.03919	9.35316	4.37317	1.55571e-05	4.15635e-05	2.20575	Up
AGR2	1.90822	15.315	4.37326	1.55511e-05	4.15541e-05	2.20611	Up
PLEK	1.17896	10.1221	4.37339	1.5542e-05	4.15471e-05	2.20667	Up
DRC7	1.4472	3.17908	4.38585	1.47159e-05	3.94633e-05	2.25856	Up
PCDHB16	1.2701	7.77017	4.38989	1.44574e-05	3.88092e-05	2.27541	Up
CLEC18A	1.16522	3.42471	4.39041	1.44243e-05	3.87258e-05	2.27759	Up
SAA4	1.78021	2.73095	4.39363	1.42216e-05	3.82423e-05	2.29104	Up
FGF17	1.25126	2.96797	4.39472	1.4154e-05	3.8087e-05	2.29557	Up
IFNL3	1.26199	1.32433	4.39491	1.41418e-05	3.80606e-05	2.29638	Up
ICAM5	1.1773	5.37792	4.3959	1.40804e-05	3.79118e-05	2.30052	Up
ILDR2	1.45518	6.98579	4.40134	1.37478e-05	3.71072e-05	2.32325	Up
MUC16	2.51775	6.60895	4.40161	1.37314e-05	3.70685e-05	2.32438	Up
DNAH10	1.02547	6.38618	4.40183	1.37183e-05	3.70384e-05	2.32529	Up
GFY	1.76658	2.2361	4.41137	1.31537e-05	3.56534e-05	2.36525	Up
GLI1	1.30331	7.67589	4.41235	1.30968e-05	3.55095e-05	2.36937	Up
SAA2	2.28001	6.676	4.41428	1.29861e-05	3.523e-05	2.37744	Up
GDA	1.93363	10.1572	4.41788	1.27812e-05	3.47247e-05	2.39256	Up
C20orf202	1.10789	5.1641	4.42061	1.26281e-05	3.43464e-05	2.40402	Up
COLEC10	1.14266	2.87932	4.4209	1.26121e-05	3.4325e-05	2.40523	Up
PLAAT3	1.06509	11.3597	4.42158	1.25743e-05	3.42323e-05	2.40808	Up
CLDN6	2.59306	4.27313	4.42471	1.24016e-05	3.37918e-05	2.42123	Up
ARID3A	1.14917	10.4143	4.42584	1.23397e-05	3.36412e-05	2.42599	Up
TRPV1	1.03817	4.34362	4.42766	1.22409e-05	3.33978e-05	2.43364	Up
GBP4	1.25754	11.9398	4.4292	1.21576e-05	3.31948e-05	2.44013	Up
CCR4	1.33891	7.13136	4.43052	1.20872e-05	3.30172e-05	2.44565	Up
UBL4B	1.04162	1.665	4.43311	1.1949e-05	3.26635e-05	2.45659	Up
CYP26A1	1.33743	2.53406	4.43381	1.19124e-05	3.25778e-05	2.45951	Up
PLGLB2	1.00584	1.72394	4.4343	1.18864e-05	3.25211e-05	2.46159	Up
HTR2C	2.15193	2.22508	4.43516	1.18411e-05	3.24065e-05	2.46522	Up
IL12RB1	1.01838	8.23004	4.43633	1.17799e-05	3.22437e-05	2.47015	Up
CALML6	1.20925	2.87884	4.43944	1.16187e-05	3.18542e-05	2.48325	Up
CDC20B	1.3557	2.69902	4.44129	1.15241e-05	3.16086e-05	2.49104	Up
TGFB2	1.12732	8.50861	4.44304	1.14349e-05	3.13732e-05	2.49843	Up
TNFRSF10C	1.14892	7.47477	4.4471	1.12307e-05	3.08402e-05	2.51557	Up
AQP2	2.37197	3.95653	4.44836	1.11684e-05	3.06827e-05	2.52086	Up
MYOF	1.00827	13.1542	4.45057	1.10589e-05	3.04178e-05	2.53024	Up
BICC1	1.19731	9.62497	4.45476	1.08551e-05	2.98924e-05	2.54794	Up
GGT5	1.02235	10.9639	4.45529	1.08294e-05	2.98261e-05	2.55019	Up
DNAJB13	1.27434	3.24663	4.45813	1.06939e-05	2.94832e-05	2.56218	Up
MEGF6	1.18158	10.0503	4.45922	1.06419e-05	2.93618e-05	2.56681	Up
ADCY10	1.18694	4.09015	4.46075	1.057e-05	2.91762e-05	2.57327	Up
CCDC166	1.16669	1.42331	4.46177	1.0522e-05	2.90525e-05	2.57759	Up
MNS1	1.11325	7.82191	4.46392	1.04216e-05	2.87795e-05	2.58672	Up
CFAP92	1.38895	6.62245	4.46482	1.03801e-05	2.86817e-05	2.59052	Up
SLFN12L	1.11788	6.94593	4.46574	1.03378e-05	2.85818e-05	2.59441	Up
KCNE1	1.06018	4.24743	4.4667	1.02934e-05	2.84676e-05	2.5985	Up
H4C13	1.16243	2.10827	4.47027	1.01311e-05	2.80521e-05	2.61363	Up
CLEC19A	1.39035	2.21689	4.4726	1.00264e-05	2.77868e-05	2.62352	Up
TMEM190	1.10721	3.10644	4.47331	9.99472e-06	2.77114e-05	2.62653	Up
CCDC187	1.78802	4.69783	4.4745	9.94176e-06	2.75769e-05	2.63159	Up
OR1Q1	1.0817	1.26493	4.47596	9.87725e-06	2.74143e-05	2.63778	Up
SCD	1.1927	13.4849	4.47649	9.8538e-06	2.73573e-05	2.64005	Up
GABRR1	2.22111	3.50694	4.47829	9.77502e-06	2.71548e-05	2.64769	Up
RANBP17	1.49473	7.37336	4.47877	9.75438e-06	2.71055e-05	2.6497	Up
CFAP206	1.17774	1.96969	4.47899	9.74441e-06	2.70819e-05	2.65067	Up
GBX2	1.39932	2.19946	4.47948	9.72318e-06	2.70269e-05	2.65275	Up
IGFL3	1.42552	1.7369	4.48143	9.63921e-06	2.68015e-05	2.66101	Up
KCNJ2	1.08903	8.23317	4.48328	9.55973e-06	2.65924e-05	2.66889	Up
H2BC7	1.22112	4.85925	4.48457	9.50477e-06	2.64592e-05	2.67438	Up
CD24	1.37929	15.3746	4.48707	9.39927e-06	2.6189e-05	2.68501	Up
ATP8B3	1.01462	6.59302	4.48781	9.36816e-06	2.61062e-05	2.68816	Up
INHBC	1.2134	2.53077	4.49042	9.25949e-06	2.58304e-05	2.69927	Up
FSTL3	1.19466	10.5748	4.49243	9.17642e-06	2.56064e-05	2.70785	Up
KIAA1549L	1.64303	7.50318	4.49521	9.06291e-06	2.53123e-05	2.71971	Up
RPA4	1.08624	3.72394	4.49664	9.00517e-06	2.51683e-05	2.72579	Up
GLIS2	1.01719	10.47	4.49971	8.88198e-06	2.48592e-05	2.73891	Up
TMEM45B	1.34965	12.2935	4.50112	8.82603e-06	2.47174e-05	2.74493	Up
CAGE1	1.24777	2.31853	4.50337	8.73764e-06	2.44846e-05	2.75451	Up
EDN1	1.08718	9.67414	4.50696	8.59792e-06	2.41184e-05	2.76987	Up
FBXO47	1.30366	1.67592	4.50953	8.49924e-06	2.38524e-05	2.78086	Up
TAS2R10	1.17815	2.1894	4.50997	8.48256e-06	2.38091e-05	2.78273	Up
RGPD1	1.06362	2.91733	4.51141	8.42807e-06	2.36633e-05	2.78887	Up
ZAN	1.75402	3.31968	4.51186	8.41072e-06	2.36217e-05	2.79083	Up
MOGAT3	2.21835	7.17987	4.51253	8.38553e-06	2.35652e-05	2.79369	Up
CD200R1L	1.37113	1.7787	4.51522	8.28476e-06	2.32925e-05	2.80521	Up
TUBB8	1.16437	2.4755	4.51586	8.26117e-06	2.32402e-05	2.80792	Up
SIX3	2.1366	3.85941	4.51598	8.25651e-06	2.32306e-05	2.80846	Up
C3AR1	1.11232	9.4814	4.51967	8.1207e-06	2.28658e-05	2.82426	Up
CUZD1	1.19239	5.58881	4.52214	8.03116e-06	2.26342e-05	2.83482	Up
HOXB5	1.23352	8.80945	4.52223	8.02779e-06	2.26281e-05	2.83522	Up
MUCL1	1.87106	2.41625	4.52547	7.91161e-06	2.23242e-05	2.84911	Up
ANKRD45	1.52668	4.41638	4.52698	7.85787e-06	2.21894e-05	2.85561	Up
DNAH14	1.52917	7.50418	4.52839	7.80826e-06	2.20693e-05	2.86164	Up
SLC39A5	2.30653	9.2348	4.52896	7.78811e-06	2.20249e-05	2.8641	Up
ZNF714	1.00699	9.3404	4.53279	7.65478e-06	2.1687e-05	2.88056	Up
PF4V1	1.44201	2.2882	4.5341	7.60994e-06	2.1571e-05	2.88615	Up
LILRB2	1.10204	8.82648	4.53648	7.52863e-06	2.13535e-05	2.89639	Up
LRRD1	1.24603	2.47805	4.53784	7.48256e-06	2.12292e-05	2.90224	Up
FATE1	1.12485	2.80591	4.53924	7.43529e-06	2.10983e-05	2.90828	Up
CCDC87	1.08879	5.092	4.54046	7.39459e-06	2.09892e-05	2.91351	Up
GJB2	1.28156	11.25	4.54061	7.38957e-06	2.09782e-05	2.91416	Up
SLC43A1	1.05911	10.6678	4.54065	7.38813e-06	2.09773e-05	2.91434	Up
CAMSAP3	1.0953	11.6587	4.54079	7.38361e-06	2.09678e-05	2.91493	Up
ARID3C	1.16017	2.72116	4.54629	7.20251e-06	2.0494e-05	2.9386	Up
PVRIG	1.10471	4.36638	4.54725	7.17115e-06	2.04141e-05	2.94275	Up
TGFBI	1.08073	13.2614	4.55334	6.9764e-06	1.9887e-05	2.969	Up
FGFRL1	1.04187	11.5111	4.55456	6.93809e-06	1.97869e-05	2.97425	Up
TMEM272	1.33372	3.23239	4.55458	6.93729e-06	1.97869e-05	2.97436	Up
LRRIQ3	1.0776	5.3752	4.55866	6.81045e-06	1.94437e-05	2.99195	Up
RP1L1	1.33086	4.53908	4.56007	6.7671e-06	1.93258e-05	2.99804	Up
LGALS4	1.99088	14.02	4.5667	6.56665e-06	1.87937e-05	3.0267	Up
C4A	1.46061	9.30602	4.5676	6.53985e-06	1.87199e-05	3.0306	Up
CCDC148	1.14958	5.16024	4.57404	6.35131e-06	1.82081e-05	3.0585	Up
MANSC4	1.14704	2.17078	4.57487	6.32763e-06	1.81458e-05	3.06206	Up
HPX	1.25807	4.63076	4.57544	6.31102e-06	1.81078e-05	3.06456	Up
KRT19	1.42441	15.2067	4.58153	6.13889e-06	1.76371e-05	3.09093	Up
GPR132	1.0135	8.29826	4.58378	6.07636e-06	1.74682e-05	3.1007	Up
PLAC1	1.74644	3.50151	4.58599	6.0156e-06	1.7323e-05	3.11028	Up
LTA	1.25127	5.54582	4.5874	5.97707e-06	1.722e-05	3.11641	Up
CFAP77	1.18324	2.57029	4.58809	5.95831e-06	1.71686e-05	3.11941	Up
EPHA1	1.10347	10.7026	4.59437	5.79016e-06	1.67125e-05	3.14672	Up
SYT13	2.16596	10.3867	4.59806	5.6935e-06	1.64539e-05	3.16278	Up
RSPH1	1.14676	7.87623	4.59808	5.6931e-06	1.64539e-05	3.16284	Up
H2BC11	1.1684	6.88156	4.60062	5.62737e-06	1.62779e-05	3.17392	Up
CYBB	1.18186	11.3455	4.60202	5.59152e-06	1.61867e-05	3.18002	Up
TCHH	1.22988	4.73192	4.6025	5.57943e-06	1.61593e-05	3.18208	Up
TNFSF18	1.52902	4.81484	4.61007	5.3896e-06	1.56459e-05	3.21511	Up
RXFP4	1.55681	4.14825	4.61348	5.30636e-06	1.54154e-05	3.22996	Up
IFIT2	1.12149	9.46176	4.61789	5.20026e-06	1.51246e-05	3.24923	Up
TAL2	1.07358	2.05703	4.61914	5.1705e-06	1.50451e-05	3.25471	Up
ATF7IP2	1.0149	9.58986	4.62239	5.0942e-06	1.48393e-05	3.2689	Up
ADORA1	1.15585	6.56269	4.6246	5.04293e-06	1.47014e-05	3.27855	Up
SP6	1.47716	8.61709	4.62482	5.03788e-06	1.4689e-05	3.27951	Up
COCH	1.73158	7.4433	4.62575	5.01642e-06	1.4631e-05	3.28358	Up
TCAP	1.10996	5.76801	4.62579	5.01544e-06	1.46304e-05	3.28377	Up
ZNF117	1.17308	10.2727	4.6281	4.96251e-06	1.44987e-05	3.29389	Up
TNS4	2.37557	10.9956	4.62832	4.95747e-06	1.44862e-05	3.29486	Up
PRRX1	1.43957	10.3439	4.63437	4.82192e-06	1.41123e-05	3.32132	Up
AMELX	1.39084	2.0774	4.63539	4.7992e-06	1.40502e-05	3.32583	Up
TEX11	1.42706	4.6455	4.63603	4.78528e-06	1.40116e-05	3.3286	Up
FBXW10B	1.25657	4.83363	4.63611	4.78336e-06	1.40082e-05	3.32899	Up
ASB9	1.02267	7.02433	4.63699	4.76421e-06	1.39543e-05	3.33282	Up
DUSP9	2.29361	4.16465	4.63925	4.71493e-06	1.38208e-05	3.34274	Up
LUM	1.21333	14.3021	4.64057	4.68641e-06	1.37437e-05	3.34853	Up
SLCO3A1	1.01606	10.7566	4.64094	4.67845e-06	1.37268e-05	3.35016	Up
ANKRD33	1.74656	2.2732	4.64258	4.64339e-06	1.36362e-05	3.35734	Up
FIBCD1	2.3857	6.14085	4.64297	4.6349e-06	1.36141e-05	3.35908	Up
SAG	1.26057	2.99628	4.64338	4.62624e-06	1.35929e-05	3.36087	Up
FAM217A	1.16244	3.18229	4.64583	4.57444e-06	1.34513e-05	3.37162	Up
KISS1	1.62674	4.41611	4.64923	4.5033e-06	1.3263e-05	3.38658	Up
TJP3	1.22238	11.9947	4.64989	4.48983e-06	1.32255e-05	3.38944	Up
TMEM145	1.46372	5.318	4.65622	4.36063e-06	1.28672e-05	3.41732	Up
OBP2A	1.22932	1.37501	4.66296	4.22719e-06	1.2495e-05	3.447	Up
NRCAM	1.60071	8.65034	4.6642	4.20303e-06	1.24278e-05	3.45247	Up
CLPSL2	1.54081	1.7605	4.6662	4.16442e-06	1.23273e-05	3.46129	Up
NKD2	1.88025	7.80607	4.66751	4.13938e-06	1.2261e-05	3.46705	Up
LRRC25	1.04726	8.62527	4.67493	3.99988e-06	1.1878e-05	3.49979	Up
SLCO1B1	1.83245	2.08059	4.67623	3.97578e-06	1.18158e-05	3.50556	Up
NKAIN4	1.71829	4.46196	4.67653	3.9704e-06	1.18017e-05	3.50686	Up
VCAM1	1.09733	10.4297	4.67716	3.95881e-06	1.17729e-05	3.50965	Up
IDO2	1.31848	3.43666	4.68074	3.89379e-06	1.1598e-05	3.52546	Up
TMPRSS5	1.5753	5.54716	4.68234	3.8649e-06	1.1523e-05	3.53258	Up
MSH4	1.43415	3.61169	4.68281	3.85654e-06	1.15018e-05	3.53465	Up
ACRBP	1.12617	7.76075	4.6845	3.82656e-06	1.1416e-05	3.5421	Up
LHX1	2.04036	2.73199	4.68506	3.81661e-06	1.13939e-05	3.54459	Up
CYP2W1	2.55776	8.11721	4.68827	3.76029e-06	1.12458e-05	3.55879	Up
H2BC14	1.39122	3.39445	4.69377	3.66553e-06	1.09707e-05	3.58318	Up
SHISA2	1.52466	7.69844	4.70593	3.46417e-06	1.04065e-05	3.63716	Up
ACSBG2	1.15264	3.64048	4.70691	3.44844e-06	1.03609e-05	3.64151	Up
FABP6	2.03654	5.96709	4.70729	3.44247e-06	1.03454e-05	3.64317	Up
HORMAD1	2.19531	4.6189	4.70978	3.40281e-06	1.02403e-05	3.65424	Up
GRIN3A	1.02037	5.90569	4.71065	3.38901e-06	1.02004e-05	3.65813	Up
GABRR2	1.24982	4.30712	4.71155	3.37483e-06	1.01659e-05	3.66213	Up
BICDL2	1.26068	10.2694	4.71326	3.34814e-06	1.00921e-05	3.66972	Up
GOLT1A	1.85666	7.86272	4.7151	3.31953e-06	1.00172e-05	3.67792	Up
EPPK1	1.31846	11.6878	4.71626	3.3016e-06	9.97112e-06	3.6831	Up
ITGB4	1.19176	14.6506	4.71701	3.29018e-06	9.94306e-06	3.68641	Up
EMX1	2.43429	5.98412	4.71914	3.25762e-06	9.84947e-06	3.69592	Up
LAMA5	1.14367	13.7928	4.7213	3.225e-06	9.75744e-06	3.70554	Up
ITGA4	1.19566	9.80894	4.7289	3.11271e-06	9.43887e-06	3.73941	Up
CDH17	2.80774	11.7155	4.72956	3.10313e-06	9.41443e-06	3.74236	Up
PTPN7	1.1531	9.31398	4.7307	3.08663e-06	9.36741e-06	3.74746	Up
TAF7L	1.46209	3.1463	4.73114	3.08018e-06	9.34938e-06	3.74946	Up
DCST2	1.12324	5.50267	4.73167	3.07257e-06	9.32931e-06	3.75182	Up
CPB2	1.49869	2.43657	4.73386	3.04142e-06	9.24075e-06	3.76156	Up
PARVG	1.00369	8.94567	4.73439	3.03383e-06	9.22218e-06	3.76395	Up
GOLGA8B	1.33898	9.05138	4.74037	2.95024e-06	8.98568e-06	3.79066	Up
H1-3	1.22912	4.5346	4.74262	2.91927e-06	8.89717e-06	3.80075	Up
TUBA3E	1.14973	2.54628	4.74657	2.86582e-06	8.75143e-06	3.81842	Up
CSAG2	2.21528	2.16611	4.74687	2.86184e-06	8.74072e-06	3.81975	Up
TRPM5	1.96267	5.01725	4.74688	2.86163e-06	8.74072e-06	3.81982	Up
BOLL	1.52661	3.21792	4.75194	2.79459e-06	8.55214e-06	3.84249	Up
TMEM238	1.05218	11.0942	4.75528	2.75123e-06	8.42357e-06	3.85745	Up
PCDHB13	1.18896	8.1187	4.75728	2.72546e-06	8.35566e-06	3.86645	Up
CNGB3	1.62251	3.78382	4.75925	2.70038e-06	8.28149e-06	3.87529	Up
UNC13A	1.56335	6.80439	4.76304	2.65281e-06	8.14633e-06	3.89229	Up
IZUMO2	1.59563	2.56429	4.76589	2.61746e-06	8.0444e-06	3.90512	Up
LYPD1	1.31708	5.72169	4.76989	2.5688e-06	7.90527e-06	3.92307	Up
KCNG3	1.7413	3.88612	4.77477	2.51047e-06	7.73727e-06	3.94504	Up
AOC1	1.90841	12.3252	4.77632	2.49227e-06	7.68245e-06	3.952	Up
KIAA1210	1.32528	2.2988	4.77633	2.49207e-06	7.68245e-06	3.95208	Up
CFAP65	1.51913	5.30409	4.78233	2.42272e-06	7.4829e-06	3.97908	Up
VDR	1.1263	11.5725	4.78952	2.34194e-06	7.25141e-06	4.01152	Up
SMC1B	1.64863	5.10889	4.79386	2.2944e-06	7.11723e-06	4.03114	Up
FBXW10	1.23972	4.04383	4.79389	2.29414e-06	7.11723e-06	4.03125	Up
GCNA	1.05082	5.71811	4.79553	2.27647e-06	7.06719e-06	4.03865	Up
ASCL5	1.49279	3.9901	4.79568	2.27483e-06	7.06357e-06	4.03934	Up
SLCO1B3	2.76786	3.89893	4.79888	2.24072e-06	6.96346e-06	4.0538	Up
H2AC13	1.30759	4.8221	4.7991	2.23837e-06	6.95732e-06	4.0548	Up
PLAC8L1	1.02667	4.0739	4.80029	2.22585e-06	6.92069e-06	4.06017	Up
CCL4	1.28698	9.16149	4.80307	2.19677e-06	6.83828e-06	4.07276	Up
CRB3	1.02431	10.4188	4.80315	2.19591e-06	6.83673e-06	4.07313	Up
DNASE2B	1.51707	3.25727	4.80596	2.16697e-06	6.75225e-06	4.08583	Up
PRRG1	1.03891	9.43786	4.80611	2.16535e-06	6.74834e-06	4.08655	Up
PCED1B	1.02225	8.96466	4.8076	2.15013e-06	6.70428e-06	4.0933	Up
HHEX	1.1247	9.19122	4.82791	1.95285e-06	6.11572e-06	4.18542	Up
RNASE10	1.19399	1.98155	4.83154	1.91944e-06	6.01716e-06	4.20194	Up
MPP4	1.17257	3.50402	4.83184	1.91671e-06	6.00963e-06	4.2033	Up
CLDN20	1.06272	3.96976	4.83282	1.9078e-06	5.98471e-06	4.20776	Up
ITIH6	1.93847	3.13768	4.83371	1.89973e-06	5.9604e-06	4.21182	Up
IFNL2	1.35193	1.48798	4.8341	1.89626e-06	5.9505e-06	4.21357	Up
DUSP2	1.09921	8.921	4.83493	1.88871e-06	5.9318e-06	4.2174	Up
SRCIN1	1.58601	8.94788	4.8358	1.88099e-06	5.91056e-06	4.22131	Up
PLEKHN1	1.35346	8.07881	4.84358	1.81261e-06	5.70928e-06	4.25677	Up
NPIPA9	1.03212	2.43038	4.84415	1.80765e-06	5.69737e-06	4.2594	Up
NFAM1	1.10439	9.02141	4.84563	1.79502e-06	5.65852e-06	4.26611	Up
CCDC40	1.05052	7.86031	4.84726	1.78109e-06	5.61748e-06	4.27357	Up
ULBP3	1.37892	6.42165	4.84753	1.7788e-06	5.6112e-06	4.2748	Up
SUN3	1.59033	2.60919	4.84898	1.76654e-06	5.57723e-06	4.28143	Up
KRT23	2.82476	7.54606	4.84984	1.7593e-06	5.55627e-06	4.28536	Up
ABHD2	1.09817	14.1988	4.85027	1.75575e-06	5.54599e-06	4.2873	Up
EPHX4	1.50943	6.44544	4.85106	1.74914e-06	5.52699e-06	4.29091	Up
PIP5K1B	1.42244	10.9782	4.85121	1.7479e-06	5.52495e-06	4.29159	Up
APOL4	1.20535	9.32235	4.85897	1.68439e-06	5.33958e-06	4.32703	Up
SLC22A14	1.30565	2.89486	4.86302	1.6521e-06	5.24255e-06	4.34558	Up
MAPK12	1.01022	8.38694	4.8674	1.61786e-06	5.13915e-06	4.36564	Up
SLC4A9	1.33657	3.86946	4.86793	1.61375e-06	5.12699e-06	4.36807	Up
FAM166A	1.00473	2.92917	4.86839	1.61026e-06	5.11764e-06	4.37015	Up
EGFLAM	1.08352	7.94268	4.88058	1.51895e-06	4.84149e-06	4.42607	Up
PLEKHH1	1.03714	10.887	4.88128	1.51389e-06	4.82701e-06	4.42927	Up
KCNK1	1.32835	11.173	4.88224	1.50697e-06	4.80658e-06	4.43366	Up
IL17C	1.92907	4.33663	4.88226	1.50679e-06	4.80658e-06	4.43377	Up
H3-4	1.12102	1.9584	4.88264	1.50403e-06	4.80049e-06	4.43553	Up
RENBP	1.08828	8.72188	4.88417	1.49308e-06	4.76635e-06	4.44253	Up
NUP210L	1.48153	4.14998	4.88517	1.48595e-06	4.74604e-06	4.44712	Up
MLXIPL	2.16128	9.04725	4.88631	1.47782e-06	4.72102e-06	4.45238	Up
PTPN3	1.05526	11.0561	4.8874	1.47015e-06	4.69797e-06	4.45736	Up
TFAP2E	1.27929	6.02528	4.88875	1.46061e-06	4.67229e-06	4.4636	Up
C4B	1.53515	9.27522	4.89594	1.41109e-06	4.52399e-06	4.49665	Up
L1TD1	1.62568	3.97688	4.89602	1.41051e-06	4.52291e-06	4.49704	Up
OR1J4	1.22311	1.37092	4.89682	1.40514e-06	4.50722e-06	4.5007	Up
LOXHD1	1.3185	4.12736	4.89737	1.4014e-06	4.496e-06	4.50326	Up
CALCR	1.43743	3.36293	4.89799	1.39724e-06	4.48344e-06	4.5061	Up
RASEF	1.40265	11.1985	4.89809	1.39657e-06	4.48205e-06	4.50656	Up
ELOVL2	1.50095	5.67774	4.89857	1.39333e-06	4.47243e-06	4.50879	Up
CA5A	1.40399	3.06896	4.89863	1.39296e-06	4.472e-06	4.50905	Up
CSAG1	3.30908	4.39574	4.90093	1.37762e-06	4.42725e-06	4.51966	Up
ISYNA1	1.189	10.4305	4.90191	1.37114e-06	4.4088e-06	4.52417	Up
MAGEA12	3.68475	3.74814	4.90196	1.37086e-06	4.40865e-06	4.52437	Up
PLK2	1.04461	10.8733	4.90207	1.3701e-06	4.40698e-06	4.5249	Up
LRRC32	1.13826	11.4452	4.90596	1.34472e-06	4.33429e-06	4.54283	Up
RNF148	1.14551	3.07582	4.90797	1.33179e-06	4.29487e-06	4.55208	Up
MAGEA6	3.926	4.10896	4.90853	1.32819e-06	4.28398e-06	4.55468	Up
PLA2G4E	1.89551	4.47065	4.90856	1.32802e-06	4.28398e-06	4.5548	Up
DNAH12	1.4653	5.23901	4.90917	1.3241e-06	4.27375e-06	4.55764	Up
B3GNT3	1.3196	12.2855	4.91087	1.31327e-06	4.24321e-06	4.5655	Up
H1-5	1.53091	4.50006	4.91253	1.30284e-06	4.2117e-06	4.57315	Up
NAT1	1.00291	8.98778	4.91275	1.30145e-06	4.20793e-06	4.57417	Up
TM4SF1	1.25673	13.6496	4.91329	1.29808e-06	4.19775e-06	4.57666	Up
H2AC4	1.09207	1.77909	4.91846	1.26613e-06	4.10014e-06	4.60054	Up
BEST3	1.87253	3.03827	4.91852	1.26574e-06	4.09959e-06	4.60084	Up
ACP4	1.14336	3.47597	4.92612	1.22022e-06	3.9611e-06	4.63595	Up
SLC35G6	1.06532	3.05804	4.92659	1.21744e-06	3.95277e-06	4.63814	Up
BST2	1.2175	12.3472	4.92813	1.2084e-06	3.92544e-06	4.64529	Up
LHFPL5	1.59796	3.24675	4.92967	1.19947e-06	3.89779e-06	4.6524	Up
TLDC2	1.39912	8.52121	4.92977	1.19888e-06	3.89656e-06	4.65287	Up
SMIM22	1.52552	10.8878	4.93043	1.19505e-06	3.88617e-06	4.65593	Up
TLE6	1.09499	6.3879	4.93218	1.18501e-06	3.85753e-06	4.66403	Up
FGF8	1.22177	2.44636	4.93397	1.1748e-06	3.82699e-06	4.67232	Up
LRRC56	1.15486	7.90908	4.93484	1.16989e-06	3.81163e-06	4.67634	Up
SPTBN2	1.60806	10.7747	4.93504	1.16873e-06	3.80853e-06	4.67729	Up
SAMD3	1.34857	6.06819	4.93505	1.16868e-06	3.80853e-06	4.67733	Up
ZNF114	1.5609	5.0188	4.9409	1.13607e-06	3.7073e-06	4.70446	Up
CCL18	1.97547	9.6666	4.94247	1.12746e-06	3.68112e-06	4.71176	Up
AQP9	1.78356	7.65322	4.94251	1.12724e-06	3.68105e-06	4.71195	Up
GATA6	1.28725	12.1498	4.94667	1.10476e-06	3.6108e-06	4.73127	Up
BOLA2B	1.0396	5.19446	4.94994	1.08742e-06	3.55662e-06	4.74644	Up
CSF2RA	1.11844	8.63579	4.9514	1.07971e-06	3.5339e-06	4.75326	Up
TGIF2-RAB5IF	1.02624	1.97027	4.95558	1.05807e-06	3.46732e-06	4.77268	Up
IL2RG	1.39226	12.2605	4.95613	1.05526e-06	3.45932e-06	4.77523	Up
PROC	1.82484	6.84407	4.95887	1.04131e-06	3.4172e-06	4.788	Up
AGRP	1.11213	3.14099	4.96079	1.03165e-06	3.38909e-06	4.79693	Up
KCNA7	1.26753	2.75888	4.96294	1.02095e-06	3.35569e-06	4.80694	Up
ERVW-1	1.39781	4.3732	4.96504	1.01059e-06	3.32458e-06	4.81672	Up
CD300A	1.06436	8.42277	4.96526	1.00951e-06	3.3222e-06	4.81774	Up
FNDC7	1.25723	1.52281	4.97038	9.84657e-07	3.24271e-06	4.84166	Up
CSRP3	1.09033	1.34544	4.97086	9.82401e-07	3.23814e-06	4.84386	Up
PTPRH	1.50242	11.1372	4.97153	9.79165e-07	3.22804e-06	4.84702	Up
IL21R	1.34936	7.56261	4.97195	9.77203e-07	3.22328e-06	4.84894	Up
RNF144A	1.02833	10.0871	4.97217	9.76154e-07	3.22093e-06	4.84997	Up
TMC8	1.11086	10.0481	4.97399	9.67554e-07	3.19428e-06	4.85846	Up
CSAG3	2.76345	2.81446	4.97485	9.63494e-07	3.18257e-06	4.8625	Up
SH3D21	1.20191	8.71506	4.97534	9.61219e-07	3.17674e-06	4.86477	Up
LRRC8E	1.11433	5.85126	4.98362	9.23187e-07	3.05973e-06	4.9035	Up
TYW1B	1.0258	7.71137	4.98687	9.08714e-07	3.01712e-06	4.91866	Up
HLA-F	1.03286	12.2097	4.98942	8.97444e-07	2.98236e-06	4.93063	Up
CFAP57	1.21413	4.30881	4.99088	8.91099e-07	2.96286e-06	4.93744	Up
GJA5	1.0351	8.72689	4.99235	8.84717e-07	2.94269e-06	4.94434	Up
SMPDL3B	1.44637	10.0119	4.99263	8.83499e-07	2.93916e-06	4.94566	Up
CCNB3	1.31566	5.62084	4.99461	8.75026e-07	2.91305e-06	4.95491	Up
ERN2	2.26519	11.2149	4.99515	8.72727e-07	2.90644e-06	4.95743	Up
USP18	1.01465	8.79239	4.99799	8.60668e-07	2.86935e-06	4.97079	Up
SIGLEC10	1.33153	8.98914	4.9983	8.59381e-07	2.86558e-06	4.97222	Up
CLCF1	1.00977	9.12513	4.99983	8.52994e-07	2.8473e-06	4.97938	Up
LBP	2.26597	4.36623	5.00005	8.52053e-07	2.84492e-06	4.98044	Up
TTC16	1.23951	4.08724	5.0002	8.51438e-07	2.84367e-06	4.98113	Up
MPZL3	1.01987	9.6813	5.00648	8.25707e-07	2.76169e-06	5.01058	Up
SLC45A2	1.67566	2.68526	5.00735	8.22195e-07	2.75291e-06	5.01467	Up
PRSS55	1.61428	2.10539	5.00914	8.15029e-07	2.72989e-06	5.02308	Up
MILR1	1.11902	7.50025	5.00938	8.14057e-07	2.72713e-06	5.02422	Up
SIGLEC12	1.68366	6.59594	5.01384	7.96464e-07	2.67299e-06	5.04519	Up
MIP	1.07364	3.21843	5.01424	7.94914e-07	2.66875e-06	5.04706	Up
ADGRD2	1.4839	2.84249	5.01534	7.90647e-07	2.65586e-06	5.05223	Up
ZC3H11B	1.01267	3.60641	5.01699	7.84272e-07	2.6373e-06	5.06	Up
XKR9	1.69832	7.59502	5.01767	7.81689e-07	2.63004e-06	5.06317	Up
OIT3	1.58612	5.57286	5.01782	7.81095e-07	2.62851e-06	5.0639	Up
EPYC	2.36786	3.35916	5.01876	7.77495e-07	2.61782e-06	5.06833	Up
PDC	1.26072	2.94701	5.01878	7.7744e-07	2.61782e-06	5.0684	Up
SLC22A16	1.4589	2.7055	5.01956	7.74473e-07	2.60905e-06	5.07207	Up
TSPEAR	1.79024	5.3752	5.02314	7.61001e-07	2.56645e-06	5.08891	Up
CRISPLD1	1.56088	8.35506	5.0233	7.60406e-07	2.56491e-06	5.08967	Up
GLIS3	1.42784	9.60511	5.02482	7.54724e-07	2.54897e-06	5.09686	Up
CDKL4	1.34387	2.7989	5.02485	7.54636e-07	2.54897e-06	5.09698	Up
SEMA7A	1.1703	9.5074	5.02614	7.49869e-07	2.53395e-06	5.10306	Up
CACNA1E	1.94931	6.1495	5.0293	7.38323e-07	2.49765e-06	5.11796	Up
RIPPLY1	1.33853	2.14123	5.03436	7.20202e-07	2.44034e-06	5.14181	Up
CSTL1	1.68784	2.48913	5.03505	7.17749e-07	2.43247e-06	5.14509	Up
CLEC4A	1.06498	7.01492	5.04006	7.00311e-07	2.37596e-06	5.16871	Up
TRPV4	1.26852	7.71752	5.04119	6.96408e-07	2.36401e-06	5.17407	Up
[truncated: 3,020 more rows]
