# Supplementary material for: Immune infiltration and prognosis in gastric cancer: role of NAD+ metabolism-related markers
Source: PeerJ. 2024 Jul 31;12:e17833. doi: 10.7717/peerj.17833 (PMC11297443; doi:10.7717/peerj.17833)
Supplement: Supplemental Information 3 — they were enriched to 152 GO Biological Process (BPs), 38 GO Molecular Function (MFs) [file peerj-12-17833-s003.xlsx]

## Sheet: Sheet1
	ONTOLOGY	Description	BgRatio	pvalue	p.adjust	qvalue	geneID	Count
GO:0009435	BP	NAD biosynthetic process	26/18800	6e-10	7.2e-08	2.6e-08	PARP9/SLC22A13/NMRK2/PTGIS	4
GO:0019359	BP	nicotinamide nucleotide biosynthetic process	28/18800	8.21e-10	7.2e-08	2.6e-08	PARP9/SLC22A13/NMRK2/PTGIS	4
GO:0019363	BP	pyridine nucleotide biosynthetic process	28/18800	8.21e-10	7.2e-08	2.6e-08	PARP9/SLC22A13/NMRK2/PTGIS	4
GO:0072525	BP	pyridine-containing compound biosynthetic process	31/18800	1.26e-09	7.2e-08	2.6e-08	PARP9/SLC22A13/NMRK2/PTGIS	4
GO:0019362	BP	pyridine nucleotide metabolic process	32/18800	1.44e-09	7.2e-08	2.6e-08	PARP9/SLC22A13/NMRK2/PTGIS	4
GO:0046496	BP	nicotinamide nucleotide metabolic process	32/18800	1.44e-09	7.2e-08	2.6e-08	PARP9/SLC22A13/NMRK2/PTGIS	4
GO:0072524	BP	pyridine-containing compound metabolic process	38/18800	2.95e-09	1.27e-07	4.57e-08	PARP9/SLC22A13/NMRK2/PTGIS	4
GO:0034356	BP	NAD biosynthesis via nicotinamide riboside salvage pathway	10/18800	1.3e-08	4.87e-07	1.76e-07	PARP9/SLC22A13/PTGIS	3
GO:0009117	BP	nucleotide metabolic process	487/18800	5.63e-08	1.86e-06	6.73e-07	NT5C1A/PARP9/ENPP3/SLC22A13/NMRK2/PTGIS	6
GO:0006753	BP	nucleoside phosphate metabolic process	495/18800	6.21e-08	1.86e-06	6.73e-07	NT5C1A/PARP9/ENPP3/SLC22A13/NMRK2/PTGIS	6
GO:0009165	BP	nucleotide biosynthetic process	255/18800	6.51e-06	0.000167892	6.07e-05	PARP9/SLC22A13/NMRK2/PTGIS	4
GO:1901293	BP	nucleoside phosphate biosynthetic process	257/18800	6.72e-06	0.000167892	6.07e-05	PARP9/SLC22A13/NMRK2/PTGIS	4
GO:0140289	BP	protein mono-ADP-ribosylation	12/18800	1.68e-05	0.000386758	0.000139776	PARP14/PARP9	2
GO:0060330	BP	regulation of response to interferon-gamma	16/18800	3.04e-05	0.000608746	0.000220003	PARP14/PARP9	2
GO:0060334	BP	regulation of interferon-gamma-mediated signaling pathway	16/18800	3.04e-05	0.000608746	0.000220003	PARP14/PARP9	2
GO:0060333	BP	interferon-gamma-mediated signaling pathway	25/18800	7.59e-05	0.00142311	0.000514316	PARP14/PARP9	2
GO:0006471	BP	protein ADP-ribosylation	35/18800	0.000150107	0.00264894	0.000957336	PARP14/PARP9	2
GO:0031348	BP	negative regulation of defense response	268/18800	0.000319194	0.0053199	0.00192263	PARP14/ENPP3/PTGIS	3
GO:0001961	BP	positive regulation of cytokine-mediated signaling pathway	57/18800	0.000400133	0.00631789	0.00228331	PARP14/PARP9	2
GO:0060760	BP	positive regulation of response to cytokine stimulus	64/18800	0.000504428	0.00753748	0.00272407	PARP14/PARP9	2
GO:2001142	BP	nicotinate transport	1/18800	0.000531915	0.00753748	0.00272407	SLC22A13	1
GO:0042531	BP	positive regulation of tyrosine phosphorylation of STAT protein	67/18800	0.000552748	0.00753748	0.00272407	PARP14/PARP9	2
GO:0002831	BP	regulation of response to biotic stimulus	351/18800	0.000702402	0.00916177	0.00331109	PARP14/PARP9/SLC22A13	3
GO:1901292	BP	nucleoside phosphate catabolic process	82/18800	0.00082672	0.0101627	0.00367284	NT5C1A/ENPP3	2
GO:0042509	BP	regulation of tyrosine phosphorylation of STAT protein	83/18800	0.000846892	0.0101627	0.00367284	PARP14/PARP9	2
GO:0007260	BP	tyrosine phosphorylation of STAT protein	87/18800	0.000929953	0.0106358	0.0038438	PARP14/PARP9	2
GO:0002276	BP	basophil activation involved in immune response	2/18800	0.00106357	0.0106358	0.0038438	ENPP3	1
GO:0002852	BP	regulation of T cell mediated cytotoxicity directed against tumor cell target	2/18800	0.00106357	0.0106358	0.0038438	SLC22A13	1
GO:0002854	BP	positive regulation of T cell mediated cytotoxicity directed against tumor cell target	2/18800	0.00106357	0.0106358	0.0038438	SLC22A13	1
GO:1902216	BP	positive regulation of interleukin-4-mediated signaling pathway	2/18800	0.00106357	0.0106358	0.0038438	PARP14	1
GO:0032102	BP	negative regulation of response to external stimulus	429/18800	0.00125651	0.0121597	0.00439458	PARP14/ENPP3/PTGIS	3
GO:0045575	BP	basophil activation	3/18800	0.00159498	0.0140734	0.00508616	ENPP3	1
GO:0070667	BP	negative regulation of mast cell proliferation	3/18800	0.00159498	0.0140734	0.00508616	ENPP3	1
GO:1902214	BP	regulation of interleukin-4-mediated signaling pathway	3/18800	0.00159498	0.0140734	0.00508616	PARP14	1
GO:0071346	BP	cellular response to interferon-gamma	118/18800	0.00170094	0.0145795	0.00526908	PARP14/PARP9	2
GO:0046054	BP	dGMP metabolic process	4/18800	0.00212613	0.0163549	0.0059107	NT5C1A	1
GO:0046055	BP	dGMP catabolic process	4/18800	0.00212613	0.0163549	0.0059107	NT5C1A	1
GO:0046059	BP	dAMP catabolic process	4/18800	0.00212613	0.0163549	0.0059107	NT5C1A	1
GO:0070666	BP	regulation of mast cell proliferation	4/18800	0.00212613	0.0163549	0.0059107	ENPP3	1
GO:0034341	BP	response to interferon-gamma	140/18800	0.0023826	0.0178695	0.0064581	PARP14/PARP9	2
GO:0002419	BP	T cell mediated cytotoxicity directed against tumor cell target	5/18800	0.00265703	0.0181161	0.00654723	SLC22A13	1
GO:0006196	BP	AMP catabolic process	5/18800	0.00265703	0.0181161	0.00654723	NT5C1A	1
GO:0006204	BP	IMP catabolic process	5/18800	0.00265703	0.0181161	0.00654723	NT5C1A	1
GO:0070662	BP	mast cell proliferation	5/18800	0.00265703	0.0181161	0.00654723	ENPP3	1
GO:0046434	BP	organophosphate catabolic process	157/18800	0.00298426	0.0195164	0.00705328	NT5C1A/ENPP3	2
GO:0002842	BP	positive regulation of T cell mediated immune response to tumor cell	6/18800	0.00318767	0.0195164	0.00705328	SLC22A13	1
GO:0009172	BP	purine deoxyribonucleoside monophosphate catabolic process	6/18800	0.00318767	0.0195164	0.00705328	NT5C1A	1
GO:0060332	BP	positive regulation of response to interferon-gamma	6/18800	0.00318767	0.0195164	0.00705328	PARP9	1
GO:0060335	BP	positive regulation of interferon-gamma-mediated signaling pathway	6/18800	0.00318767	0.0195164	0.00705328	PARP9	1
GO:0001959	BP	regulation of cytokine-mediated signaling pathway	166/18800	0.00332885	0.0198322	0.00716743	PARP14/PARP9	2
GO:0007259	BP	receptor signaling pathway via JAK-STAT	173/18800	0.00360923	0.0198322	0.00716743	PARP14/PARP9	2
GO:0015747	BP	urate transport	7/18800	0.00371806	0.0198322	0.00716743	SLC22A13	1
GO:0035771	BP	interleukin-4-mediated signaling pathway	7/18800	0.00371806	0.0198322	0.00716743	PARP14	1
GO:0046053	BP	dAMP metabolic process	7/18800	0.00371806	0.0198322	0.00716743	NT5C1A	1
GO:0060331	BP	negative regulation of response to interferon-gamma	7/18800	0.00371806	0.0198322	0.00716743	PARP14	1
GO:0060336	BP	negative regulation of interferon-gamma-mediated signaling pathway	7/18800	0.00371806	0.0198322	0.00716743	PARP14	1
GO:0060759	BP	regulation of response to cytokine stimulus	178/18800	0.00381607	0.0198322	0.00716743	PARP14/PARP9	2
GO:0050777	BP	negative regulation of immune response	179/18800	0.00385809	0.0198322	0.00716743	PARP14/ENPP3	2
GO:0002833	BP	positive regulation of response to biotic stimulus	180/18800	0.00390033	0.0198322	0.00716743	PARP9/SLC22A13	2
GO:0050728	BP	negative regulation of inflammatory response	182/18800	0.00398547	0.0199134	0.00719678	ENPP3/PTGIS	2
GO:0097696	BP	receptor signaling pathway via STAT	184/18800	0.00407147	0.0199134	0.00719678	PARP14/PARP9	2
GO:0000255	BP	allantoin metabolic process	8/18800	0.00424819	0.0199134	0.00719678	NT5C1A	1
GO:0070212	BP	protein poly-ADP-ribosylation	8/18800	0.00424819	0.0199134	0.00719678	PARP14	1
GO:1900119	BP	positive regulation of execution phase of apoptosis	8/18800	0.00424819	0.0199134	0.00719678	PTGIS	1
GO:0050731	BP	positive regulation of peptidyl-tyrosine phosphorylation	190/18800	0.00433469	0.0200063	0.00723034	PARP14/PARP9	2
GO:0002840	BP	regulation of T cell mediated immune response to tumor cell	9/18800	0.00477808	0.0207742	0.00750788	SLC22A13	1
GO:0009170	BP	purine deoxyribonucleoside monophosphate metabolic process	9/18800	0.00477808	0.0207742	0.00750788	NT5C1A	1
GO:0019371	BP	cyclooxygenase pathway	9/18800	0.00477808	0.0207742	0.00750788	PTGIS	1
GO:0035360	BP	positive regulation of peroxisome proliferator activated receptor signaling pathway	9/18800	0.00477808	0.0207742	0.00750788	PTGIS	1
GO:0009128	BP	purine nucleoside monophosphate catabolic process	10/18800	0.0053077	0.0218125	0.0078831	NT5C1A	1
GO:0009155	BP	purine deoxyribonucleotide catabolic process	10/18800	0.0053077	0.0218125	0.0078831	NT5C1A	1
GO:0009169	BP	purine ribonucleoside monophosphate catabolic process	10/18800	0.0053077	0.0218125	0.0078831	NT5C1A	1
GO:0033007	BP	negative regulation of mast cell activation involved in immune response	10/18800	0.0053077	0.0218125	0.0078831	ENPP3	1
GO:0046085	BP	adenosine metabolic process	11/18800	0.00583708	0.0236638	0.00855219	NT5C1A	1
GO:0045088	BP	regulation of innate immune response	231/18800	0.00633908	0.0248034	0.00896402	PARP14/PARP9	2
GO:0002424	BP	T cell mediated immune response to tumor cell	12/18800	0.00636619	0.0248034	0.00896402	SLC22A13	1
GO:0010459	BP	negative regulation of heart rate	12/18800	0.00636619	0.0248034	0.00896402	RNLS	1
GO:0009143	BP	nucleoside triphosphate catabolic process	13/18800	0.00689506	0.0265131	0.00958194	ENPP3	1
GO:0002699	BP	positive regulation of immune effector process	248/18800	0.00727341	0.0265131	0.00958194	ENPP3/SLC22A13	2
GO:0009158	BP	ribonucleoside monophosphate catabolic process	14/18800	0.00742367	0.0265131	0.00958194	NT5C1A	1
GO:0009159	BP	deoxyribonucleoside monophosphate catabolic process	14/18800	0.00742367	0.0265131	0.00958194	NT5C1A	1
GO:0033004	BP	negative regulation of mast cell activation	14/18800	0.00742367	0.0265131	0.00958194	ENPP3	1
GO:0035563	BP	positive regulation of chromatin binding	14/18800	0.00742367	0.0265131	0.00958194	PARP9	1
GO:0071871	BP	response to epinephrine	14/18800	0.00742367	0.0265131	0.00958194	RNLS	1
GO:0002836	BP	positive regulation of response to tumor cell	15/18800	0.00795203	0.0273677	0.00989078	SLC22A13	1
GO:0002839	BP	positive regulation of immune response to tumor cell	15/18800	0.00795203	0.0273677	0.00989078	SLC22A13	1
GO:0035358	BP	regulation of peroxisome proliferator activated receptor signaling pathway	15/18800	0.00795203	0.0273677	0.00989078	PTGIS	1
GO:0050730	BP	regulation of peptidyl-tyrosine phosphorylation	261/18800	0.00802786	0.0273677	0.00989078	PARP14/PARP9	2
GO:0009151	BP	purine deoxyribonucleotide metabolic process	16/18800	0.00848014	0.0279565	0.0101036	NT5C1A	1
GO:0042532	BP	negative regulation of tyrosine phosphorylation of STAT protein	16/18800	0.00848014	0.0279565	0.0101036	PARP14	1
GO:2001034	BP	positive regulation of double-strand break repair via nonhomologous end joining	16/18800	0.00848014	0.0279565	0.0101036	PARP9	1
GO:0045019	BP	negative regulation of nitric oxide biosynthetic process	17/18800	0.00900799	0.029058	0.0105017	PTGIS	1
GO:1904406	BP	negative regulation of nitric oxide metabolic process	17/18800	0.00900799	0.029058	0.0105017	PTGIS	1
GO:0009125	BP	nucleoside monophosphate catabolic process	18/18800	0.00953559	0.0301124	0.0108827	NT5C1A	1
GO:0046040	BP	IMP metabolic process	18/18800	0.00953559	0.0301124	0.0108827	NT5C1A	1
GO:0002837	BP	regulation of immune response to tumor cell	20/18800	0.01059	0.0327527	0.0118369	SLC22A13	1
GO:1902074	BP	response to salt	20/18800	0.01059	0.0327527	0.0118369	RNLS	1
GO:0002834	BP	regulation of response to tumor cell	22/18800	0.0116435	0.0352832	0.0127515	SLC22A13	1
GO:0035357	BP	peroxisome proliferator activated receptor signaling pathway	22/18800	0.0116435	0.0352832	0.0127515	PTGIS	1
GO:0046128	BP	purine ribonucleoside metabolic process	23/18800	0.0121698	0.0365094	0.0131946	NT5C1A	1
GO:0009162	BP	deoxyribonucleoside monophosphate metabolic process	24/18800	0.0126959	0.0373409	0.0134951	NT5C1A	1
GO:0035561	BP	regulation of chromatin binding	24/18800	0.0126959	0.0373409	0.0134951	PARP9	1
GO:0045662	BP	negative regulation of myoblast differentiation	25/18800	0.0132217	0.0381396	0.0137838	NMRK2	1
GO:0046033	BP	AMP metabolic process	25/18800	0.0132217	0.0381396	0.0137838	NT5C1A	1
GO:0045822	BP	negative regulation of heart contraction	26/18800	0.0137473	0.039278	0.0141952	RNLS	1
GO:0002418	BP	immune response to tumor cell	27/18800	0.0142726	0.0394138	0.0142443	SLC22A13	1
GO:0046426	BP	negative regulation of receptor signaling pathway via JAK-STAT	27/18800	0.0142726	0.0394138	0.0142443	PARP14	1
GO:1903523	BP	negative regulation of blood circulation	27/18800	0.0142726	0.0394138	0.0142443	RNLS	1
GO:0002697	BP	regulation of immune effector process	353/18800	0.0143203	0.0394138	0.0142443	ENPP3/SLC22A13	2
GO:0042278	BP	purine nucleoside metabolic process	28/18800	0.0147977	0.0403225	0.0145727	NT5C1A	1
GO:0009264	BP	deoxyribonucleotide catabolic process	29/18800	0.0153225	0.0403225	0.0145727	NT5C1A	1
GO:0019674	BP	NAD metabolic process	29/18800	0.0153225	0.0403225	0.0145727	NMRK2	1
GO:1900117	BP	regulation of execution phase of apoptosis	29/18800	0.0153225	0.0403225	0.0145727	PTGIS	1
GO:2001032	BP	regulation of double-strand break repair via nonhomologous end joining	29/18800	0.0153225	0.0403225	0.0145727	PARP9	1
GO:0001916	BP	positive regulation of T cell mediated cytotoxicity	30/18800	0.0158471	0.0407714	0.0147349	SLC22A13	1
GO:0046386	BP	deoxyribose phosphate catabolic process	30/18800	0.0158471	0.0407714	0.0147349	NT5C1A	1
GO:0018108	BP	peptidyl-tyrosine phosphorylation	373/18800	0.0159008	0.0407714	0.0147349	PARP14/PARP9	2
GO:0018212	BP	peptidyl-tyrosine modification	376/18800	0.0161442	0.0410446	0.0148337	PARP14/PARP9	2
GO:0002230	BP	positive regulation of defense response to virus by host	31/18800	0.0163714	0.0412085	0.0148929	PARP9	1
GO:0001516	BP	prostaglandin biosynthetic process	32/18800	0.0168955	0.0412085	0.0148929	PTGIS	1
GO:0019082	BP	viral protein processing	32/18800	0.0168955	0.0412085	0.0148929	PARP9	1
GO:0046457	BP	prostanoid biosynthetic process	32/18800	0.0168955	0.0412085	0.0148929	PTGIS	1
GO:0071353	BP	cellular response to interleukin-4	32/18800	0.0168955	0.0412085	0.0148929	PARP14	1
GO:0050727	BP	regulation of inflammatory response	394/18800	0.0176387	0.0420537	0.0151983	ENPP3/PTGIS	2
GO:0006631	BP	fatty acid metabolic process	395/18800	0.0177234	0.0420537	0.0151983	SLC22A13/PTGIS	2
GO:0033006	BP	regulation of mast cell activation involved in immune response	34/18800	0.0179429	0.0420537	0.0151983	ENPP3	1
GO:0070670	BP	response to interleukin-4	34/18800	0.0179429	0.0420537	0.0151983	PARP14	1
GO:1904893	BP	negative regulation of receptor signaling pathway via STAT	34/18800	0.0179429	0.0420537	0.0151983	PARP14	1
GO:0045922	BP	negative regulation of fatty acid metabolic process	35/18800	0.0184662	0.0428779	0.0154962	SLC22A13	1
GO:0034655	BP	nucleobase-containing compound catabolic process	405/18800	0.0185804	0.0428779	0.0154962	NT5C1A/ENPP3	2
GO:0009119	BP	ribonucleoside metabolic process	37/18800	0.0195121	0.0446842	0.016149	NT5C1A	1
GO:0016311	BP	dephosphorylation	422/18800	0.0200778	0.0456314	0.0164913	NT5DC4/NT5C1A	2
GO:0002683	BP	negative regulation of immune system process	425/18800	0.0203473	0.0458961	0.016587	PARP14/ENPP3	2
GO:0001914	BP	regulation of T cell mediated cytotoxicity	40/18800	0.021079	0.0471919	0.0170553	SLC22A13	1
GO:0009154	BP	purine ribonucleotide catabolic process	41/18800	0.0216008	0.0474052	0.0171324	NT5C1A	1
GO:0046700	BP	heterocycle catabolic process	443/18800	0.0219966	0.0474052	0.0171324	NT5C1A/ENPP3	2
GO:0002347	BP	response to tumor cell	42/18800	0.0221224	0.0474052	0.0171324	SLC22A13	1
GO:0009167	BP	purine ribonucleoside monophosphate metabolic process	42/18800	0.0221224	0.0474052	0.0171324	NT5C1A	1
GO:0050691	BP	regulation of defense response to virus by host	42/18800	0.0221224	0.0474052	0.0171324	PARP9	1
GO:0071354	BP	cellular response to interleukin-6	42/18800	0.0221224	0.0474052	0.0171324	PTGIS	1
GO:0044270	BP	cellular nitrogen compound catabolic process	449/18800	0.0225587	0.0478388	0.0172891	NT5C1A/ENPP3	2
GO:0009394	BP	2'-deoxyribonucleotide metabolic process	43/18800	0.0226437	0.0478388	0.0172891	NT5C1A	1
GO:0009126	BP	purine nucleoside monophosphate metabolic process	44/18800	0.0231648	0.04826	0.0174413	NT5C1A	1
GO:0009262	BP	deoxyribonucleotide metabolic process	44/18800	0.0231648	0.04826	0.0174413	NT5C1A	1
GO:0006195	BP	purine nucleotide catabolic process	45/18800	0.0236856	0.0483379	0.0174695	NT5C1A	1
GO:0019692	BP	deoxyribose phosphate metabolic process	45/18800	0.0236856	0.0483379	0.0174695	NT5C1A	1
GO:0033003	BP	regulation of mast cell activation	45/18800	0.0236856	0.0483379	0.0174695	ENPP3	1
GO:0019439	BP	aromatic compound catabolic process	466/18800	0.0241841	0.0484123	0.0174964	NT5C1A/ENPP3	2
GO:0009261	BP	ribonucleotide catabolic process	46/18800	0.0242062	0.0484123	0.0174964	NT5C1A	1
GO:0070741	BP	response to interleukin-6	46/18800	0.0242062	0.0484123	0.0174964	PTGIS	1
GO:0036230	BP	granulocyte activation	47/18800	0.0247265	0.0488022	0.0176373	ENPP3	1
GO:0045776	BP	negative regulation of blood pressure	47/18800	0.0247265	0.0488022	0.0176373	RNLS	1
GO:0008253	MF	5'-nucleotidase activity	13/18410	2.06e-05	0.000888918	0.000248546	NT5DC4/NT5C1A	2
GO:0008252	MF	nucleotidase activity	15/18410	2.78e-05	0.000888918	0.000248546	NT5DC4/NT5C1A	2
GO:1990404	MF	NAD+-protein ADP-ribosyltransferase activity	20/18410	5.02e-05	0.00106846	0.000298746	PARP14/PARP9	2
GO:0003950	MF	NAD+ ADP-ribosyltransferase activity	23/18410	6.68e-05	0.00106846	0.000298746	PARP14/PARP9	2
GO:0016763	MF	pentosyltransferase activity	49/18410	0.000308071	0.00356066	0.000995579	PARP14/PARP9	2
GO:0051287	MF	NAD binding	51/18410	0.000333812	0.00356066	0.000995579	RNLS/AOX1	2
GO:0008116	MF	prostaglandin-I synthase activity	1/18410	0.000543183	0.00434546	0.00121502	PTGIS	1
GO:0090416	MF	nicotinate transmembrane transporter activity	1/18410	0.000543183	0.00434546	0.00121502	SLC22A13	1
GO:0042578	MF	phosphoric ester hydrolase activity	366/18410	0.000842942	0.00579254	0.00161962	NT5DC4/NT5C1A/ENPP3	3
GO:0050262	MF	ribosylnicotinamide kinase activity	2/18410	0.0010861	0.00579254	0.00161962	NMRK2	1
GO:0061769	MF	ribosylnicotinate kinase activity	2/18410	0.0010861	0.00579254	0.00161962	NMRK2	1
GO:0072570	MF	ADP-D-ribose binding	2/18410	0.0010861	0.00579254	0.00161962	PARP9	1
GO:0004031	MF	aldehyde oxidase activity	3/18410	0.00162875	0.00651501	0.00182163	AOX1	1
GO:0050483	MF	IMP 5'-nucleotidase activity	3/18410	0.00162875	0.00651501	0.00182163	NT5C1A	1
GO:0070404	MF	NADH binding	3/18410	0.00162875	0.00651501	0.00182163	RNLS	1
GO:0097621	MF	monoamine oxidase activity	3/18410	0.00162875	0.00651501	0.00182163	RNLS	1
GO:0016623	MF	oxidoreductase activity, acting on the aldehyde or oxo group of donors, oxygen as acceptor	4/18410	0.00217114	0.0081737	0.00228541	AOX1	1
GO:0004528	MF	phosphodiesterase I activity	5/18410	0.00271326	0.0091394	0.00255543	ENPP3	1
GO:0036218	MF	dTTP diphosphatase activity	5/18410	0.00271326	0.0091394	0.00255543	ENPP3	1
GO:0005506	MF	iron ion binding	151/18410	0.00288031	0.009217	0.00257712	AOX1/PTGIS	2
GO:0043546	MF	molybdopterin cofactor binding	6/18410	0.00325512	0.00946943	0.0026477	AOX1	1
GO:0051379	MF	epinephrine binding	6/18410	0.00325512	0.00946943	0.0026477	RNLS	1
GO:0106256	MF	hydroperoxy icosatetraenoate dehydratase activity	7/18410	0.00379671	0.0105648	0.00295396	PTGIS	1
GO:0003714	MF	transcription corepressor activity	191/18410	0.00456164	0.0121644	0.00340122	PARP14/PARP9	2
GO:0035529	MF	NADH pyrophosphatase activity	9/18410	0.0048791	0.0124905	0.00349241	ENPP3	1
GO:0047429	MF	nucleoside-triphosphate diphosphatase activity	11/18410	0.00596043	0.0146718	0.00410232	ENPP3	1
GO:0097677	MF	STAT family protein binding	12/18410	0.00650069	0.0154091	0.00430845	PARP9	1
GO:1901338	MF	catecholamine binding	13/18410	0.0070407	0.016093	0.00449969	RNLS	1
GO:0016641	MF	oxidoreductase activity, acting on the CH-NH2 group of donors, oxygen as acceptor	16/18410	0.00865913	0.0191098	0.0053432	RNLS	1
GO:0016757	MF	glycosyltransferase activity	271/18410	0.00898651	0.0191712	0.00536037	PARP14/PARP9	2
GO:0016791	MF	phosphatase activity	276/18410	0.00930829	0.0192171	0.0053732	NT5DC4/NT5C1A	2
GO:0004551	MF	nucleotide diphosphatase activity	20/18410	0.0108133	0.0209713	0.00586369	ENPP3	1
GO:0016638	MF	oxidoreductase activity, acting on the CH-NH2 group of donors	20/18410	0.0108133	0.0209713	0.00586369	RNLS	1
GO:0051537	MF	2 iron, 2 sulfur cluster binding	24/18410	0.0129633	0.0244016	0.00682281	AOX1	1
GO:0071949	MF	FAD binding	37/18410	0.0199218	0.0364284	0.0101856	AOX1	1
GO:0016903	MF	oxidoreductase activity, acting on the aldehyde or oxo group of donors	46/18410	0.0247133	0.0439348	0.0122844	AOX1	1
GO:0016860	MF	intramolecular oxidoreductase activity	50/18410	0.0268361	0.0464192	0.0129791	PTGIS	1
GO:0003712	MF	transcription coregulator activity	497/18410	0.0283542	0.0477545	0.0133524	PARP14/PARP9	2
			Table S3
