# Supplementary material for: Immune infiltration and prognosis in gastric cancer: role of NAD+ metabolism-related markers
Source: PeerJ. 2024 Jul 31;12:e17833. doi: 10.7717/peerj.17833 (PMC11297443; doi:10.7717/peerj.17833)
Supplement: Supplemental Information 4 — 13 KEGG pathways [file peerj-12-17833-s004.xlsx]

## Sheet: Sheet1
ID	Description	BgRatio	pvalue	p.adjust	qvalue	geneID	Count
hsa00760	Nicotinate and nicotinamide metabolism	36/8160	7.49e-12	9.73e-11	1.58e-11	284958/84618/5169/27231/316	5
hsa00240	Pyrimidine metabolism	58/8160	6.71e-06	4.36e-05	7.07e-06	284958/84618/5169	3
hsa01232	Nucleotide metabolism	85/8160	2.13e-05	9.24e-05	1.5e-05	284958/84618/5169	3
hsa00230	Purine metabolism	128/8160	7.29e-05	0.000236775	3.83e-05	284958/84618/5169	3
hsa00770	Pantothenate and CoA biosynthesis	21/8160	0.0153468	0.0399018	0.00646183	5169	1
hsa00350	Tyrosine metabolism	36/8160	0.0261883	0.0486354	0.00787617	316	1
hsa00500	Starch and sucrose metabolism	36/8160	0.0261883	0.0486354	0.00787617	5169	1
hsa00380	Tryptophan metabolism	42/8160	0.0304969	0.0495575	0.0080255	316	1
hsa00280	Valine, leucine and isoleucine degradation	48/8160	0.0347896	0.0502517	0.00813793	316	1
hsa00590	Arachidonic acid metabolism	61/8160	0.0440362	0.0561194	0.00908816	5740	1
hsa00830	Retinol metabolism	68/8160	0.0489845	0.0561194	0.00908816	316	1
hsa00982	Drug metabolism - cytochrome P450	72/8160	0.0518025	0.0561194	0.00908816	316	1
hsa04630	JAK-STAT signaling pathway	162/8160	0.113393	0.113393	0.0183632	316	1
			Table S4
