# Supplementary material for: Immune infiltration and prognosis in gastric cancer: role of NAD+ metabolism-related markers
Source: PeerJ. 2024 Jul 31;12:e17833. doi: 10.7717/peerj.17833 (PMC11297443; doi:10.7717/peerj.17833)
Supplement: Supplemental Information 5 — There were 2,956 DEGs2 between high and low score groups [file peerj-12-17833-s005.xlsx]

## Sheet: Sheet1
	logFC	AveExpr	t	P.Value	adj.P.Val	B	change
TXLNB	-1.99985	5.85527	-16.4026	5.15028e-46	9.58827e-42	93.8517	Down
HACD4	-1.51209	9.37559	-15.7981	1.68147e-43	8.31362e-40	88.124	Down
KCNT2	-1.93571	5.96059	-15.7809	1.98003e-43	8.31362e-40	87.9622	Down
ANK2	-2.3613	9.01978	-15.7598	2.42164e-43	8.31362e-40	87.763	Down
RECK	-1.52264	9.03071	-15.7493	2.67595e-43	8.31362e-40	87.6642	Down
SYNE1	-1.80855	11.23	-15.7355	3.05504e-43	8.31362e-40	87.5331	Down
ABI3BP	-2.53426	10.2243	-15.7216	3.48732e-43	8.31362e-40	87.4022	Down
CMYA5	-1.74179	7.10189	-15.719	3.57249e-43	8.31362e-40	87.3783	Down
RBMS3	-1.71456	9.35807	-15.6374	7.77564e-43	1.60843e-39	86.6087	Down
HMCN1	-2.16073	9.72133	-15.5799	1.34458e-42	2.5032e-39	86.0668	Down
ABCA6	-2.01071	7.64184	-15.5403	1.95979e-42	3.31686e-39	85.694	Down
ABCA9	-2.26928	6.98756	-15.3894	8.21639e-42	1.22869e-38	84.2757	Down
ZNF135	-1.74334	6.44348	-15.3848	8.57979e-42	1.22869e-38	84.2329	Down
SHE	-1.47017	8.66105	-15.346	1.23955e-41	1.64833e-38	83.8689	Down
LRCH2	-1.63415	7.21774	-15.1204	1.04958e-40	1.30267e-37	81.7551	Down
STARD9	-1.64061	9.14789	-15.0727	1.6471e-40	1.9165e-37	81.3092	Down
ZCCHC18	-1.52618	4.73224	-15.0165	2.79961e-40	3.05353e-37	80.7844	Down
MPDZ	-1.74732	9.5464	-15.0109	2.95233e-40	3.05353e-37	80.7318	Down
GPRASP1	-1.88461	8.04521	-14.9608	4.73402e-40	4.63859e-37	80.2646	Down
ZNF677	-1.65953	7.40363	-14.949	5.29026e-40	4.92444e-37	80.1547	Down
PGR	-2.1224	6.85748	-14.9246	6.65759e-40	5.90211e-37	79.9272	Down
PDE1A	-1.68027	8.43466	-14.8466	1.38833e-39	1.17484e-36	79.2001	Down
GNB4	-1.42578	10.7842	-14.8153	1.86343e-39	1.50833e-36	78.9089	Down
ZNF154	-1.45575	8.09826	-14.8017	2.11766e-39	1.64268e-36	78.7823	Down
MAP3K12	-1.11292	9.22408	-14.7887	2.3933e-39	1.78224e-36	78.6612	Down
ZNF471	-1.84232	6.68159	-14.7595	3.14984e-39	2.25541e-36	78.3895	Down
ARHGAP20	-1.77625	6.91555	-14.7383	3.84351e-39	2.5645e-36	78.1925	Down
PABPC5	-1.71981	5.19883	-14.735	3.96385e-39	2.5645e-36	78.162	Down
ANKDD1A	-1.1887	7.71705	-14.7342	3.99477e-39	2.5645e-36	78.1544	Down
PTGIS	-2.8682	10.0879	-14.6755	6.92974e-39	4.30037e-36	77.6094	Down
MAPK10	-1.91043	7.66171	-14.6654	7.61607e-39	4.57382e-36	77.5159	Down
ATP8B2	-1.58202	10.5717	-14.6576	8.1917e-39	4.76577e-36	77.4438	Down
SETBP1	-1.9267	9.55584	-14.6209	1.15649e-38	6.52434e-36	77.1026	Down
LRRK2	-1.83788	8.75825	-14.6155	1.21638e-38	6.6604e-36	77.0527	Down
ZNF354C	-1.56594	7.19811	-14.6073	1.3133e-38	6.98562e-36	76.9768	Down
RORA	-1.37494	9.76659	-14.5874	1.58292e-38	8.07598e-36	76.7921	Down
TRPC1	-1.63023	7.41307	-14.5859	1.60505e-38	8.07598e-36	76.7784	Down
CYBRD1	-1.80179	12.0755	-14.5627	1.99319e-38	9.76505e-36	76.5641	Down
POU6F1	-1.28717	8.49641	-14.5224	2.90737e-38	1.38786e-35	76.1906	Down
ESR1	-1.63628	6.60939	-14.5162	3.08023e-38	1.43362e-35	76.1334	Down
ZNF667	-1.75443	5.71513	-14.4902	3.92956e-38	1.74342e-35	75.8925	Down
MEF2C	-1.4379	10.6216	-14.4901	3.93315e-38	1.74342e-35	75.8916	Down
MCC	-1.48573	9.72521	-14.4642	5.01048e-38	2.16931e-35	75.6521	Down
ZEB1	-1.5275	11.2809	-14.4102	8.29424e-38	3.46708e-35	75.1534	Down
STON1	-1.84983	9.22085	-14.4073	8.5237e-38	3.46708e-35	75.1264	Down
HECTD2	-1.29018	9.11781	-14.4068	8.56666e-38	3.46708e-35	75.1214	Down
PREX2	-1.5537	9.08349	-14.4002	9.10628e-38	3.60706e-35	75.061	Down
ZNF208	-1.88723	4.96277	-14.3797	1.10235e-37	4.2755e-35	74.872	Down
ADAMTSL3	-2.13996	8.02537	-14.3639	1.27795e-37	4.85541e-35	74.7257	Down
RNF180	-1.69312	7.35985	-14.3607	1.31654e-37	4.90201e-35	74.6963	Down
ATP1B2	-1.80095	7.29708	-14.3494	1.4626e-37	5.33907e-35	74.5922	Down
DZIP1	-1.59958	8.72017	-14.3396	1.60297e-37	5.73894e-35	74.5016	Down
A2M	-1.48382	15.1653	-14.3288	1.77297e-37	6.2278e-35	74.4018	Down
SNURF	-1.75651	3.5641	-14.319	1.9419e-37	6.6949e-35	74.3118	Down
DNAJC18	-1.17521	8.54898	-14.2949	2.43063e-37	8.22746e-35	74.0897	Down
QKI	-1.19957	11.8375	-14.2869	2.61924e-37	8.70757e-35	74.0158	Down
TTC28	-1.46379	10.4987	-14.2809	2.76842e-37	9.04205e-35	73.961	Down
TCF4	-1.27924	11.7641	-14.2748	2.93181e-37	9.41059e-35	73.9042	Down
TDRD10	-1.52162	5.05842	-14.2482	3.75481e-37	1.1848e-34	73.6595	Down
MDFIC	-1.33757	10.518	-14.2257	4.62702e-37	1.43569e-34	73.4528	Down
KLF8	-1.53816	7.62383	-14.2222	4.7835e-37	1.45991e-34	73.4199	Down
ENTPD1	-1.05219	11.9684	-14.2202	4.87063e-37	1.46253e-34	73.4021	Down
DYNC2H1	-1.57336	8.60605	-14.2016	5.79374e-37	1.7121e-34	73.2304	Down
TLL1	-1.90678	6.30922	-14.1751	7.40792e-37	2.15489e-34	72.9872	Down
ZEB2	-1.41227	11.1445	-14.1726	7.5849e-37	2.17243e-34	72.9639	Down
SLC9A9	-1.5147	8.23683	-14.1359	1.06585e-36	3.00652e-34	72.6273	Down
ZNF671	-1.24533	7.79942	-14.0966	1.53494e-36	4.24771e-34	72.2665	Down
NAP1L3	-1.90281	6.06546	-14.0955	1.55151e-36	4.24771e-34	72.2559	Down
ZNF582	-1.5451	5.6496	-14.0619	2.11817e-36	5.71508e-34	71.9479	Down
FBXL7	-1.43253	9.37941	-14.0528	2.30428e-36	6.1284e-34	71.8646	Down
BHMT2	-1.99387	6.42601	-13.995	3.93686e-36	1.03229e-33	71.3347	Down
PAPLN	-1.70441	9.81771	-13.9921	4.04236e-36	1.04523e-33	71.3086	Down
DOK6	-1.46401	7.03156	-13.9387	6.62736e-36	1.69016e-33	70.8195	Down
IRAG1	-1.84857	11.2143	-13.9266	7.41067e-36	1.84918e-33	70.709	Down
PRCD	-1.28274	5.33526	-13.926	7.44957e-36	1.84918e-33	70.7038	Down
JAM2	-1.68983	9.30482	-13.9033	9.19308e-36	2.25194e-33	70.4958	Down
THSD7B	-2.68429	5.18925	-13.8757	1.18617e-35	2.86791e-33	70.2437	Down
IL1R1	-1.33069	12.0933	-13.8738	1.20697e-35	2.88078e-33	70.2265	Down
SLIT2	-2.36627	8.68996	-13.8655	1.30212e-35	3.06855e-33	70.1514	Down
BNC2	-1.97255	9.11307	-13.8629	1.33436e-35	3.10522e-33	70.1272	Down
LAMA2	-1.82445	10.0592	-13.8567	1.41315e-35	3.22675e-33	70.0705	Down
HOOK3	-1.08088	12.3528	-13.8561	1.42125e-35	3.22675e-33	70.0648	Down
MS4A4E	-1.6875	3.95972	-13.8503	1.49852e-35	3.36119e-33	70.0125	Down
HEG1	-1.32397	12.2403	-13.8487	1.52112e-35	3.37127e-33	69.9977	Down
ECM2	-1.4074	9.18123	-13.8451	1.57312e-35	3.44551e-33	69.9644	Down
FBLN5	-1.60774	11.0986	-13.8382	1.67535e-35	3.62673e-33	69.9021	Down
CRISPLD1	-1.91178	8.47778	-13.7887	2.64509e-35	5.6602e-33	69.4504	Down
CHRDL1	-3.49463	7.56742	-13.7869	2.6888e-35	5.68834e-33	69.4342	Down
PRKG1	-1.46832	9.37197	-13.7831	2.78489e-35	5.82543e-33	69.3994	Down
PKD2	-1.21361	10.7824	-13.7649	3.2924e-35	6.78993e-33	69.2338	Down
TECTA	-1.58061	5.01767	-13.764	3.31892e-35	6.78993e-33	69.2259	Down
ZNF25	-1.09705	9.13811	-13.7568	3.54647e-35	7.1766e-33	69.1603	Down
MYO9A	-1.00383	11.0653	-13.7483	3.83515e-35	7.67731e-33	69.0829	Down
FNBP1	-1.54668	11.5442	-13.7374	4.24027e-35	8.398e-33	68.9836	Down
ZFP28	-1.64316	6.90842	-13.7235	4.82002e-35	9.44571e-33	68.8568	Down
CPED1	-1.98936	9.92497	-13.7175	5.09507e-35	9.88072e-33	68.8019	Down
IFFO1	-1.1707	8.72402	-13.7053	5.6971e-35	1.08285e-32	68.6915	Down
NXPE3	-1.2128	9.84108	-13.7053	5.70011e-35	1.08285e-32	68.6909	Down
ZNF382	-1.46861	6.81272	-13.6942	6.31e-35	1.1866e-32	68.5904	Down
KCND1	-1.28007	7.84789	-13.6906	6.52226e-35	1.21425e-32	68.5577	Down
LTBP1	-1.60834	12.2538	-13.6864	6.77755e-35	1.24551e-32	68.5197	Down
DDR2	-1.78056	11.2373	-13.6577	8.82181e-35	1.5766e-32	68.2589	Down
CC2D2A	-1.26931	9.18344	-13.6569	8.89205e-35	1.5766e-32	68.2511	Down
SULT1C4	-1.81831	6.36871	-13.6336	1.10064e-34	1.93307e-32	68.0401	Down
ABCC9	-1.93287	9.48061	-13.6302	1.13537e-34	1.96332e-32	68.0094	Down
BOC	-2.15602	9.48852	-13.6299	1.13895e-34	1.96332e-32	68.0062	Down
WNK3	-1.53362	5.57193	-13.6215	1.2299e-34	2.10065e-32	67.9303	Down
ADAMTS10	-1.47098	8.48933	-13.6128	1.33197e-34	2.25429e-32	67.8514	Down
NTRK3	-2.32695	5.56456	-13.5941	1.58223e-34	2.65373e-32	67.6811	Down
AKT3	-1.47397	10.5508	-13.586	1.70333e-34	2.80628e-32	67.6081	Down
TRIM6	-1.5249	6.27805	-13.5772	1.84727e-34	3.01672e-32	67.5279	Down
ITPR1	-1.38444	10.4803	-13.5611	2.14102e-34	3.46603e-32	67.3819	Down
PLCL1	-1.39267	8.03427	-13.5564	2.2338e-34	3.58178e-32	67.34	Down
ZNF423	-1.6895	8.98271	-13.5556	2.251e-34	3.58178e-32	67.3324	Down
GAS7	-1.58209	10.8305	-13.5439	2.50687e-34	3.95511e-32	67.2259	Down
ZNF835	-1.87931	5.23628	-13.5354	2.70849e-34	4.2373e-32	67.1494	Down
EBF1	-1.39261	9.33187	-13.5306	2.83075e-34	4.39167e-32	67.1057	Down
RFTN2	-1.07947	8.01175	-13.5274	2.91437e-34	4.48404e-32	67.0769	Down
MUSK	-2.49568	5.03697	-13.5262	2.94617e-34	4.4958e-32	67.0662	Down
FGF7	-2.08168	9.50013	-13.5121	3.35333e-34	5.07553e-32	66.9382	Down
ZMAT1	-1.87705	7.50876	-13.4845	4.31745e-34	6.46761e-32	66.6882	Down
CNTN4	-1.67581	7.99413	-13.4838	4.34254e-34	6.46761e-32	66.6825	Down
RGS7BP	-1.9864	6.59779	-13.4827	4.38735e-34	6.48248e-32	66.6723	Down
COL14A1	-2.05477	11.3984	-13.4745	4.72795e-34	6.93073e-32	66.5984	Down
NIPSNAP3B	-1.46735	5.77938	-13.4669	5.06804e-34	7.37123e-32	66.5297	Down
ADAM33	-2.44962	7.91297	-13.4563	5.58714e-34	8.06325e-32	66.4332	Down
SYT11	-1.47908	10.1363	-13.4437	6.26542e-34	8.97256e-32	66.3199	Down
PPM1K	-1.12833	10.0247	-13.4414	6.39676e-34	9.09072e-32	66.2994	Down
ZNF454	-1.54375	4.95104	-13.4275	7.26467e-34	1.02459e-31	66.1736	Down
ZNF829	-1.52149	6.86702	-13.4265	7.33049e-34	1.0261e-31	66.1646	Down
RUNX1T1	-1.86237	8.5647	-13.424	7.50213e-34	1.04229e-31	66.1417	Down
LIX1L	-1.2424	10.7816	-13.4142	8.20119e-34	1.13097e-31	66.0536	Down
ANKS1B	-2.03494	5.37331	-13.4083	8.66071e-34	1.18556e-31	65.9997	Down
MICU3	-1.54349	6.73664	-13.4037	9.02727e-34	1.22672e-31	65.9587	Down
CLIC2	-1.23566	9.13616	-13.4023	9.14057e-34	1.22972e-31	65.9464	Down
GUCY1A1	-1.84584	10.6328	-13.4019	9.18143e-34	1.22972e-31	65.942	Down
IHO1	-1.4802	5.14171	-13.3969	9.60535e-34	1.26951e-31	65.8973	Down
ANGPT1	-1.49311	7.98839	-13.3968	9.6149e-34	1.26951e-31	65.8963	Down
ZNF660	-1.51062	6.59258	-13.3892	1.03087e-33	1.35153e-31	65.8274	Down
METTL24	-2.36833	5.48857	-13.3789	1.13256e-33	1.47447e-31	65.7344	Down
ZNF568	-1.44144	7.3209	-13.3779	1.14216e-33	1.47663e-31	65.726	Down
FLRT2	-1.95942	9.19667	-13.3668	1.26457e-33	1.62362e-31	65.6253	Down
EVC2	-1.56875	7.03538	-13.3567	1.38657e-33	1.76807e-31	65.5343	Down
RBM43	-1.03106	9.18576	-13.3423	1.57991e-33	2.00089e-31	65.4052	Down
ADHFE1	-1.66763	6.10501	-13.3397	1.61797e-33	2.03525e-31	65.3816	Down
EVC	-1.67763	9.76723	-13.3273	1.81231e-33	2.2529e-31	65.2694	Down
USHBP1	-1.15231	6.81671	-13.3271	1.8152e-33	2.2529e-31	65.2679	Down
JAM3	-1.40252	10.3782	-13.324	1.86793e-33	2.303e-31	65.2395	Down
GPR88	-2.09447	4.18496	-13.3191	1.95231e-33	2.3912e-31	65.1958	Down
ZNF676	-2.25128	3.46585	-13.317	1.99008e-33	2.42152e-31	65.1769	Down
DSEL	-1.63678	7.68653	-13.316	2.00744e-33	2.42679e-31	65.1683	Down
RORB	-1.94635	5.52753	-13.3087	2.14695e-33	2.57869e-31	65.1019	Down
CSGALNACT2	-1.0116	10.7877	-13.3068	2.18472e-33	2.5952e-31	65.0846	Down
LGI2	-1.97214	8.72936	-13.3066	2.18857e-33	2.5952e-31	65.0829	Down
USP51	-1.56954	6.54837	-13.2848	2.66736e-33	3.14293e-31	64.8872	Down
ADAM23	-1.78827	7.47016	-13.2744	2.93203e-33	3.43306e-31	64.7936	Down
SCN11A	-1.91623	3.96437	-13.2608	3.31733e-33	3.85992e-31	64.6715	Down
VSTM4	-1.58884	9.40561	-13.251	3.62663e-33	4.1936e-31	64.5834	Down
ZIK1	-1.47545	6.53659	-13.2483	3.7195e-33	4.27445e-31	64.5584	Down
IGF1	-2.31217	6.75595	-13.2462	3.79129e-33	4.33021e-31	64.5395	Down
TUB	-2.03145	7.20365	-13.2294	4.4157e-33	5.01263e-31	64.3887	Down
KLHL5	-1.18938	10.9387	-13.2248	4.6044e-33	5.19516e-31	64.3473	Down
ADPRH	-1.06656	9.07456	-13.2185	4.87538e-33	5.46777e-31	64.2907	Down
YPEL4	-1.44308	5.19274	-13.2115	5.19472e-33	5.79102e-31	64.228	Down
PLEKHH2	-1.73524	9.22565	-13.197	5.92679e-33	6.5678e-31	64.0976	Down
TMEM47	-1.50889	10.5553	-13.1962	5.96813e-33	6.57448e-31	64.0907	Down
PHC1	-1.17931	9.1315	-13.1902	6.3028e-33	6.90231e-31	64.0368	Down
PRICKLE2	-1.68033	9.39926	-13.1778	7.04937e-33	7.63012e-31	63.9261	Down
EVL	-1.24091	11.0041	-13.176	7.16659e-33	7.71216e-31	63.9098	Down
TET1	-1.39055	7.57341	-13.1638	8.00783e-33	8.47056e-31	63.8	Down
FAT4	-1.68425	9.87741	-13.1606	8.24588e-33	8.67308e-31	63.771	Down
GLI3	-1.64521	9.00942	-13.1504	9.0395e-33	9.4544e-31	63.6802	Down
CYSLTR1	-1.53847	7.45844	-13.141	9.85018e-33	1.02447e-30	63.5952	Down
ZSCAN23	-2.06436	3.79396	-13.1403	9.91037e-33	1.02501e-30	63.5892	Down
DLG2	-1.69752	6.7041	-13.1372	1.01949e-32	1.04861e-30	63.5612	Down
ZSCAN12	-1.00913	8.35159	-13.1359	1.03124e-32	1.05486e-30	63.5499	Down
ABCA8	-2.52729	8.01393	-13.1337	1.05214e-32	1.07037e-30	63.53	Down
SCN2B	-2.30554	4.31678	-13.1267	1.12055e-32	1.13376e-30	63.4677	Down
AASS	-1.39938	7.89597	-13.1097	1.30768e-32	1.31595e-30	63.315	Down
ZNF521	-1.41515	8.97544	-13.1005	1.42088e-32	1.42218e-30	63.2329	Down
HTR2A	-2.10149	5.97463	-13.099	1.44056e-32	1.43417e-30	63.2193	Down
ZDHHC15	-1.83552	5.61574	-13.0967	1.47102e-32	1.4567e-30	63.1986	Down
RIC3	-2.34756	5.89732	-13.0929	1.52279e-32	1.49998e-30	63.1644	Down
FGF2	-1.84798	8.16503	-13.091	1.54844e-32	1.51723e-30	63.1479	Down
GUCY1B1	-1.42075	10.2796	-13.0886	1.58275e-32	1.54272e-30	63.1262	Down
CYP2U1	-1.29371	8.99471	-13.0879	1.5931e-32	1.54473e-30	63.1198	Down
DMGDH	-1.42129	5.12996	-13.0861	1.61838e-32	1.5611e-30	63.1042	Down
ZFPM2	-1.68905	7.91415	-13.062	2.01359e-32	1.92809e-30	62.8882	Down
CLIP3	-1.56885	10.2089	-13.0616	2.01954e-32	1.92809e-30	62.8852	Down
THSD7A	-1.46571	8.18764	-13.0329	2.61948e-32	2.48811e-30	62.628	Down
ST8SIA1	-1.43363	7.34229	-13.0169	3.02564e-32	2.85143e-30	62.4855	Down
LRFN5	-1.76523	5.0115	-13.0167	3.03262e-32	2.85143e-30	62.4832	Down
NAV3	-1.86513	6.9413	-13.0137	3.11504e-32	2.9142e-30	62.4567	Down
ANGPTL1	-2.59753	7.16996	-13.0103	3.21047e-32	2.98847e-30	62.4268	Down
WNT2B	-1.54309	9.12154	-13.0016	3.47472e-32	3.21836e-30	62.3486	Down
RTL5	-1.63001	7.8445	-12.9951	3.6834e-32	3.39475e-30	62.291	Down
RERG	-1.90675	8.45227	-12.9894	3.87842e-32	3.53944e-30	62.2399	Down
KATNAL1	-1.23566	9.37067	-12.9688	4.67148e-32	4.24239e-30	62.056	Down
PODN	-1.96524	11.0722	-12.967	4.74865e-32	4.29154e-30	62.0398	Down
SOX5	-1.53258	7.21192	-12.9649	4.83916e-32	4.35221e-30	62.0211	Down
CLIP4	-1.47459	9.38249	-12.9568	5.20502e-32	4.65874e-30	61.949	Down
CYP7B1	-1.74693	7.13217	-12.9521	5.42837e-32	4.8354e-30	61.9075	Down
C1QTNF7	-2.21448	6.93024	-12.9451	5.78169e-32	5.12561e-30	61.8451	Down
HDX	-1.50742	6.27201	-12.9412	5.991e-32	5.286e-30	61.81	Down
ITGA9	-1.61165	10.2363	-12.9399	6.06393e-32	5.3251e-30	61.798	Down
SPARCL1	-1.79095	13.2229	-12.9385	6.13588e-32	5.36299e-30	61.7863	Down
SVEP1	-1.84601	9.75788	-12.9265	6.83767e-32	5.94845e-30	61.6793	Down
RASSF2	-1.4799	10.5306	-12.9227	7.07417e-32	6.12557e-30	61.6456	Down
BEND6	-1.68247	6.28234	-12.9198	7.2623e-32	6.25937e-30	61.6197	Down
FAM13C	-1.59529	7.44432	-12.9185	7.35117e-32	6.30677e-30	61.6077	Down
SESN3	-1.61578	10.8318	-12.9161	7.50735e-32	6.41121e-30	61.5869	Down
PKNOX2	-1.74967	6.34867	-12.9139	7.66012e-32	6.4894e-30	61.5669	Down
CNTNAP1	-1.46715	9.79464	-12.9133	7.70349e-32	6.4894e-30	61.5614	Down
IL6ST	-1.09013	13.1967	-12.8976	8.86921e-32	7.43775e-30	61.422	Down
TNXB	-2.1486	10.5464	-12.8944	9.13279e-32	7.62445e-30	61.3931	Down
NPAS3	-1.80081	5.77734	-12.8896	9.53e-32	7.92054e-30	61.351	Down
LMO3	-2.05172	7.36176	-12.8811	1.02965e-31	8.51958e-30	61.2745	Down
KIRREL1	-1.26782	11.4114	-12.8805	1.03495e-31	8.52549e-30	61.2694	Down
PEG3	-1.98301	6.90141	-12.8779	1.05956e-31	8.68979e-30	61.2462	Down
EML1	-1.55926	9.97158	-12.8752	1.08573e-31	8.86538e-30	61.222	Down
RFTN1	-1.23119	10.9063	-12.8703	1.13456e-31	9.22363e-30	61.1785	Down
RNF217	-1.42456	9.09388	-12.8671	1.16708e-31	9.44674e-30	61.1506	Down
ADGRD1	-2.15998	8.35989	-12.8536	1.3176e-31	1.06189e-29	61.0307	Down
SPART	-1.47318	10.0658	-12.8451	1.42296e-31	1.14186e-29	60.9546	Down
CYRIA	-1.36787	9.14294	-12.8401	1.48845e-31	1.18929e-29	60.9101	Down
RCAN2	-1.57819	9.95564	-12.8377	1.52107e-31	1.21016e-29	60.8887	Down
SCN4B	-1.794	7.27129	-12.8313	1.61066e-31	1.27599e-29	60.8321	Down
INMT	-1.84698	8.29738	-12.8265	1.68152e-31	1.32648e-29	60.7895	Down
ADCY5	-2.42503	9.21744	-12.8227	1.73993e-31	1.36677e-29	60.7557	Down
CPEB1	-1.85568	5.32267	-12.8213	1.76095e-31	1.37747e-29	60.7439	Down
UTRN	-1.16693	12.2692	-12.811	1.9328e-31	1.50556e-29	60.6518	Down
AOX1	-2.29531	7.4572	-12.7965	2.20199e-31	1.7081e-29	60.5229	Down
EPHA3	-1.90286	9.02648	-12.7958	2.21455e-31	1.71072e-29	60.5173	Down
SGCD	-1.77983	9.73474	-12.7867	2.40437e-31	1.84968e-29	60.4359	Down
ARL10	-1.26269	8.64886	-12.7731	2.71513e-31	2.08015e-29	60.3158	Down
RASGRP2	-1.63649	8.17331	-12.767	2.86863e-31	2.17981e-29	60.2614	Down
RNF150	-2.11879	8.99677	-12.7661	2.89178e-31	2.18846e-29	60.2534	Down
PRKD1	-1.49899	7.79439	-12.7631	2.96937e-31	2.23809e-29	60.2273	Down
GXYLT2	-1.86383	8.49077	-12.7587	3.08875e-31	2.31868e-29	60.1883	Down
FAM228B	-1.04302	7.78795	-12.7559	3.16827e-31	2.36882e-29	60.1632	Down
PDE3A	-1.80648	9.82483	-12.7542	3.21583e-31	2.39477e-29	60.1484	Down
ZCCHC24	-1.58206	10.7503	-12.7427	3.56402e-31	2.63299e-29	60.0468	Down
SENP7	-1.14555	9.59843	-12.7266	4.11902e-31	3.03098e-29	59.9037	Down
RNF165	-1.81995	5.24544	-12.7195	4.3874e-31	3.21576e-29	59.8413	Down
PURG	-1.60556	3.33511	-12.719	4.41059e-31	3.22007e-29	59.8361	Down
RHOJ	-1.25383	9.6517	-12.7132	4.6438e-31	3.37709e-29	59.7851	Down
PTPRM	-1.25048	10.9734	-12.7079	4.86925e-31	3.52727e-29	59.7382	Down
ARSB	-1.05911	10.2095	-12.7045	5.01908e-31	3.61236e-29	59.7083	Down
PZP	-1.45444	4.36311	-12.7044	5.02552e-31	3.61236e-29	59.707	Down
ARHGEF6	-1.32302	10.0103	-12.6959	5.41923e-31	3.88037e-29	59.6324	Down
CACNB2	-1.58761	7.73708	-12.6948	5.47285e-31	3.90376e-29	59.6227	Down
GALNT16	-2.1903	7.19557	-12.691	5.66591e-31	4.02604e-29	59.5884	Down
FERMT2	-1.50149	11.3121	-12.6905	5.68924e-31	4.02724e-29	59.5844	Down
PABPC4L	-1.42976	6.33616	-12.6836	6.05036e-31	4.26665e-29	59.5235	Down
LCA5	-1.11043	8.34974	-12.683	6.08252e-31	4.27314e-29	59.5183	Down
KANK2	-1.32327	12.1953	-12.6787	6.32136e-31	4.42424e-29	59.4802	Down
MN1	-1.95251	9.76831	-12.6769	6.42433e-31	4.47946e-29	59.4642	Down
ZNF483	-1.59621	6.25212	-12.6739	6.60229e-31	4.58638e-29	59.4372	Down
ADD2	-1.98049	6.34329	-12.6711	6.76699e-31	4.66605e-29	59.4129	Down
SNRPN	-1.3947	9.19455	-12.6711	6.76711e-31	4.66605e-29	59.4128	Down
WWTR1	-1.35269	12.2396	-12.6706	6.79633e-31	4.6689e-29	59.4086	Down
RGL1	-1.24035	10.1422	-12.6634	7.24668e-31	4.95998e-29	59.3451	Down
GHR	-1.80081	7.3543	-12.6599	7.48258e-31	5.10268e-29	59.3135	Down
DENND5A	-1.17737	11.0989	-12.6574	7.65215e-31	5.19927e-29	59.2913	Down
COL4A3	-2.09873	6.62483	-12.6565	7.70776e-31	5.21801e-29	59.2842	Down
ANKRD53	-1.27657	5.47518	-12.6522	8.01131e-31	5.40386e-29	59.246	Down
CNKSR2	-2.52285	5.16629	-12.65	8.16953e-31	5.49069e-29	59.2266	Down
FLI1	-1.22913	9.75173	-12.6438	8.63711e-31	5.78407e-29	59.1716	Down
NR3C1	-1.2009	11.2547	-12.6319	9.60346e-31	6.40816e-29	59.0668	Down
CEP112	-1.1952	8.09764	-12.6268	1.00534e-30	6.66063e-29	59.0215	Down
CRISPLD2	-1.3252	12.1126	-12.6228	1.0419e-30	6.87841e-29	58.9862	Down
RADIL	-1.6966	5.8756	-12.6204	1.06458e-30	7.00326e-29	58.9649	Down
PTCH2	-1.79358	7.70273	-12.6104	1.16429e-30	7.63226e-29	58.8764	Down
CACNB4	-1.67122	6.31822	-12.6093	1.17487e-30	7.67461e-29	58.8674	Down
JAZF1	-1.06527	9.7062	-12.6027	1.24663e-30	8.11486e-29	58.8088	Down
C1S	-1.44649	13.5199	-12.5932	1.35725e-30	8.80417e-29	58.7248	Down
FILIP1	-1.74548	8.98868	-12.592	1.37163e-30	8.86652e-29	58.7143	Down
KIAA0825	-1.02315	6.60879	-12.5887	1.41182e-30	9.09478e-29	58.6858	Down
PLSCR4	-1.436	9.99624	-12.5838	1.47542e-30	9.47169e-29	58.6422	Down
PLXDC2	-1.52953	11.8025	-12.5829	1.48751e-30	9.51652e-29	58.6342	Down
PRELP	-2.55038	10.6148	-12.5757	1.58612e-30	1.00781e-28	58.5707	Down
FRRS1L	-2.93268	5.39638	-12.5685	1.69128e-30	1.07097e-28	58.5072	Down
OLFML1	-1.27725	9.09678	-12.5663	1.72471e-30	1.08844e-28	58.4879	Down
DIXDC1	-1.43847	10.2717	-12.5637	1.76495e-30	1.11007e-28	58.4651	Down
TRO	-1.40635	7.41974	-12.5628	1.7795e-30	1.11546e-28	58.457	Down
OGN	-3.02655	8.97274	-12.5568	1.87695e-30	1.17259e-28	58.4043	Down
KCNN3	-1.39524	9.16889	-12.5519	1.96118e-30	1.22111e-28	58.3609	Down
LRRC70	-1.18103	5.29506	-12.5507	1.9812e-30	1.22947e-28	58.3508	Down
C14orf132	-1.78942	9.31881	-12.5465	2.05752e-30	1.26999e-28	58.3135	Down
VIPR2	-2.34061	5.85904	-12.5463	2.06015e-30	1.26999e-28	58.3122	Down
SLIT3	-1.77102	10.6476	-12.5452	2.08077e-30	1.27847e-28	58.3023	Down
DNAAF9	-1.3639	10.0414	-12.5325	2.33052e-30	1.41788e-28	58.1903	Down
SPON1	-2.17828	11.3249	-12.5296	2.39053e-30	1.44966e-28	58.1652	Down
CDO1	-2.11893	5.51486	-12.5123	2.78903e-30	1.68583e-28	58.0127	Down
NHSL2	-1.81606	7.11105	-12.5056	2.95951e-30	1.78308e-28	57.9541	Down
RASL12	-1.29889	9.16593	-12.4898	3.40659e-30	2.04582e-28	57.815	Down
IGSF10	-2.19409	6.48566	-12.4853	3.54495e-30	2.12207e-28	57.7756	Down
COL19A1	-2.3668	4.43585	-12.4781	3.78114e-30	2.2562e-28	57.7119	Down
CASP12	-1.4907	3.62411	-12.4501	4.84872e-30	2.8748e-28	57.466	Down
NEGR1	-1.92869	8.80563	-12.4397	5.31768e-30	3.14283e-28	57.3748	Down
CA5B	-1.06471	8.98295	-12.4368	5.45616e-30	3.21447e-28	57.3494	Down
NPR2	-1.05573	8.94201	-12.436	5.49128e-30	3.22496e-28	57.343	Down
GPLD1	-1.42674	6.22807	-12.4354	5.52171e-30	3.23263e-28	57.3376	Down
PCDHGB6	-1.44999	7.01735	-12.4293	5.83107e-30	3.39241e-28	57.2837	Down
LINGO3	-1.91013	5.87157	-12.4245	6.08331e-30	3.52813e-28	57.2418	Down
GPC6	-1.56394	10.1641	-12.4228	6.17327e-30	3.56918e-28	57.2273	Down
ZNF570	-1.34156	7.76185	-12.4202	6.32242e-30	3.6441e-28	57.2037	Down
MOXD1	-1.77171	9.45328	-12.4114	6.83253e-30	3.91652e-28	57.127	Down
AMPH	-1.44869	6.88431	-12.4113	6.83713e-30	3.91652e-28	57.1263	Down
DCLK1	-2.05027	7.90471	-12.4106	6.8838e-30	3.93116e-28	57.1196	Down
RSPO1	-2.31373	4.80892	-12.4016	7.4508e-30	4.24194e-28	57.0414	Down
AFF3	-2.09997	7.42944	-12.3853	8.61088e-30	4.88746e-28	56.8983	Down
PCDHB4	-1.54286	7.05213	-12.3749	9.43934e-30	5.3414e-28	56.8075	Down
MAP6	-1.77859	7.50934	-12.3734	9.56774e-30	5.39766e-28	56.7942	Down
RSPO3	-2.32809	8.67526	-12.3674	1.00911e-29	5.67571e-28	56.7415	Down
MYOZ3	-1.90679	5.15562	-12.36	1.07756e-29	6.01726e-28	56.6766	Down
GAB3	-1.20336	8.06552	-12.3598	1.07883e-29	6.01726e-28	56.6755	Down
CYYR1	-1.12618	9.55719	-12.3596	1.08123e-29	6.01726e-28	56.6733	Down
PDZD4	-2.05498	6.75074	-12.3594	1.08276e-29	6.01726e-28	56.6719	Down
OMG	-1.22703	5.67892	-12.359	1.08707e-29	6.02322e-28	56.6679	Down
SLC24A4	-1.28957	5.21303	-12.3586	1.09086e-29	6.02626e-28	56.6645	Down
SCN7A	-2.79662	6.0047	-12.3577	1.09917e-29	6.05423e-28	56.657	Down
PDZD2	-1.32695	9.44805	-12.355	1.12568e-29	6.18197e-28	56.6334	Down
GRIK5	-2.05805	6.83482	-12.3491	1.18609e-29	6.49455e-28	56.5818	Down
CDK15	-1.59527	4.67746	-12.3449	1.23144e-29	6.72306e-28	56.5447	Down
SLC8A1	-1.36999	9.82213	-12.326	1.45587e-29	7.87903e-28	56.3792	Down
RBMS1	-1.12146	11.6044	-12.3252	1.46608e-29	7.91132e-28	56.3723	Down
GASK1A	-2.19298	6.68698	-12.3242	1.47888e-29	7.95733e-28	56.3637	Down
TBCEL	-1.20995	9.46674	-12.323	1.49474e-29	8.0195e-28	56.3532	Down
EFEMP1	-1.81688	11.4196	-12.3147	1.60839e-29	8.60445e-28	56.2807	Down
ANKRD44	-1.26936	9.61873	-12.3131	1.6306e-29	8.69824e-28	56.2672	Down
MAN1C1	-1.3752	9.83822	-12.312	1.64697e-29	8.76047e-28	56.2573	Down
ERG	-1.17722	9.52635	-12.3088	1.69368e-29	8.98324e-28	56.2296	Down
CAND2	-1.82144	7.44141	-12.3072	1.71851e-29	9.08905e-28	56.2153	Down
ACSS3	-1.72769	7.36959	-12.3047	1.75698e-29	9.26618e-28	56.1934	Down
SALL2	-1.90118	7.69564	-12.297	1.88056e-29	9.88992e-28	56.1262	Down
P2RY14	-1.64803	7.72564	-12.2928	1.95132e-29	1.02331e-27	56.0897	Down
GNAL	-1.43005	8.59223	-12.2867	2.06018e-29	1.07737e-27	56.036	Down
GPR162	-1.21311	6.34928	-12.2856	2.08e-29	1.08469e-27	56.0266	Down
ELN	-1.89702	11.598	-12.283	2.12802e-29	1.10475e-27	56.004	Down
TNS1	-1.77371	13.6373	-12.2829	2.13077e-29	1.10475e-27	56.0027	Down
LSAMP	-1.7489	9.43259	-12.2826	2.13627e-29	1.10475e-27	56.0002	Down
AR	-1.91781	7.19097	-12.2815	2.15585e-29	1.11179e-27	55.9912	Down
ZNF843	-1.2257	5.55714	-12.2805	2.17629e-29	1.11923e-27	55.9818	Down
MSRB3	-1.74926	10.5674	-12.2739	2.30558e-29	1.18245e-27	55.9248	Down
DPYSL3	-1.81564	12.6795	-12.271	2.36626e-29	1.21024e-27	55.8991	Down
CCDC80	-2.10046	12.2233	-12.267	2.4506e-29	1.24994e-27	55.8645	Down
GREM2	-2.87569	7.41048	-12.2588	2.63479e-29	1.34021e-27	55.7929	Down
CAMK4	-1.39359	8.04689	-12.2536	2.7595e-29	1.39983e-27	55.7471	Down
PHF24	-1.94221	4.48321	-12.2514	2.81175e-29	1.42054e-27	55.7286	Down
PNMA8B	-1.47493	6.00082	-12.2513	2.8156e-29	1.42054e-27	55.7273	Down
APBB1	-1.43788	9.36719	-12.2505	2.83575e-29	1.42684e-27	55.7202	Down
CLIC4	-1.15658	13.2098	-12.2431	3.02535e-29	1.51406e-27	55.6562	Down
TAL1	-1.26674	6.71665	-12.2428	3.03355e-29	1.51409e-27	55.6536	Down
NOVA1	-2.08942	6.94451	-12.2353	3.24232e-29	1.61397e-27	55.5878	Down
NDN	-1.45017	9.37176	-12.2325	3.32255e-29	1.64949e-27	55.5636	Down
FILIP1L	-1.3108	12.2431	-12.2319	3.34097e-29	1.65422e-27	55.5581	Down
NAP1L2	-2.16882	4.99648	-12.227	3.48671e-29	1.72181e-27	55.5159	Down
AOC3	-1.82871	10.8309	-12.2177	3.78585e-29	1.86458e-27	55.4346	Down
C1R	-1.34274	13.2566	-12.2151	3.87395e-29	1.90294e-27	55.4119	Down
MAP1A	-1.53198	10.5157	-12.2137	3.92047e-29	1.92072e-27	55.4001	Down
MYO5A	-1.18261	10.5222	-12.2091	4.08356e-29	1.99537e-27	55.3598	Down
LDB2	-1.12741	9.27674	-12.1989	4.46469e-29	2.1759e-27	55.2716	Down
NEXMIF	-2.30704	4.84598	-12.1984	4.48618e-29	2.18066e-27	55.2668	Down
MRAS	-1.27862	9.82023	-12.1893	4.86018e-29	2.3563e-27	55.1877	Down
LDLRAD4	-1.36928	10.3379	-12.1885	4.89342e-29	2.36625e-27	55.181	Down
WIPF1	-1.21042	11.9631	-12.1878	4.92696e-29	2.3763e-27	55.1742	Down
ARHGEF25	-1.62955	8.63468	-12.1779	5.37424e-29	2.58533e-27	55.0883	Down
JAKMIP2	-1.55755	6.26307	-12.1762	5.45321e-29	2.61656e-27	55.0739	Down
TDRP	-1.42875	7.05432	-12.1698	5.76947e-29	2.76119e-27	55.0182	Down
TSHZ3	-1.34946	9.2822	-12.1614	6.21254e-29	2.95803e-27	54.945	Down
FMNL3	-1.03702	11.5237	-12.1493	6.90673e-29	3.27182e-27	54.8404	Down
PALMD	-1.33304	8.99862	-12.1477	7.00643e-29	3.31063e-27	54.8262	Down
KCNS2	-1.74976	4.00169	-12.1422	7.35311e-29	3.46564e-27	54.7785	Down
CLEC4F	-1.81283	3.34888	-12.1419	7.37303e-29	3.46608e-27	54.7758	Down
RGMA	-2.40543	10.0554	-12.1416	7.39128e-29	3.46608e-27	54.7733	Down
RAB9B	-1.79635	6.47742	-12.1401	7.48793e-29	3.49404e-27	54.7605	Down
ICA1L	-1.23896	8.089	-12.1401	7.48843e-29	3.49404e-27	54.7604	Down
ZNF728	-1.95062	2.82701	-12.1355	7.80091e-29	3.63074e-27	54.72	Down
PRKCB	-1.74598	9.84417	-12.1349	7.84293e-29	3.64119e-27	54.7147	Down
GDF7	-1.8289	5.8731	-12.1308	8.12744e-29	3.75455e-27	54.6795	Down
PRKAR2B	-1.57895	9.18171	-12.1284	8.30336e-29	3.82633e-27	54.6583	Down
FLACC1	-1.32955	4.36016	-12.1272	8.39029e-29	3.84911e-27	54.648	Down
TEK	-1.26715	9.19221	-12.1271	8.39414e-29	3.84911e-27	54.6476	Down
SFMBT2	-1.26799	9.17024	-12.1242	8.61731e-29	3.94173e-27	54.6217	Down
CNR1	-2.74631	6.43264	-12.1142	9.40521e-29	4.29159e-27	54.5352	Down
CPXM2	-2.0195	9.77992	-12.1089	9.85246e-29	4.48468e-27	54.4893	Down
MFAP4	-1.97236	12.1842	-12.1078	9.94698e-29	4.51666e-27	54.4798	Down
NFASC	-1.92748	9.90956	-12.1068	1.00389e-28	4.54732e-27	54.4707	Down
RASSF8	-1.56719	9.50736	-12.1044	1.02506e-28	4.63191e-27	54.4501	Down
FAM171B	-1.30576	8.70281	-12.099	1.07428e-28	4.84259e-27	54.4038	Down
ARHGAP31	-1.15567	10.817	-12.0972	1.09168e-28	4.90913e-27	54.3879	Down
DMD	-1.80721	9.9396	-12.0936	1.12653e-28	5.05364e-27	54.3568	Down
COLEC12	-1.79305	8.84071	-12.0905	1.15738e-28	5.17956e-27	54.3301	Down
CFH	-1.44076	11.6527	-12.0887	1.17585e-28	5.2496e-27	54.3145	Down
FXYD6	-1.60019	9.47937	-12.0858	1.20625e-28	5.35962e-27	54.2893	Down
CAVIN2	-1.70169	9.65383	-12.0803	1.26628e-28	5.61292e-27	54.2413	Down
PRKACB	-1.24763	11.1067	-12.0792	1.27859e-28	5.65405e-27	54.2317	Down
TCF7L1	-1.24809	9.3946	-12.0764	1.31037e-28	5.78085e-27	54.2074	Down
LRRC8C	-1.00302	10.3292	-12.0725	1.35602e-28	5.9681e-27	54.1736	Down
CELF2	-1.53876	10.7385	-12.0702	1.38284e-28	6.0718e-27	54.1542	Down
LCN10	-1.96495	2.5841	-12.0683	1.40592e-28	6.15858e-27	54.1379	Down
BICC1	-1.53675	9.7191	-12.064	1.46002e-28	6.38058e-27	54.1006	Down
CALD1	-1.56658	14.5306	-12.0603	1.50817e-28	6.57556e-27	54.0685	Down
ALDH1A3	-1.48709	9.93443	-12.0586	1.53169e-28	6.6625e-27	54.0532	Down
HMCN2	-1.9617	9.02935	-12.0569	1.55417e-28	6.74451e-27	54.0388	Down
PLA2G4C	-1.37744	8.52755	-12.049	1.66486e-28	7.20805e-27	53.9708	Down
PYGO1	-1.59142	8.33785	-12.0411	1.78561e-28	7.71292e-27	53.9016	Down
NME8	-1.48831	3.8031	-12.0374	1.84434e-28	7.94817e-27	53.8696	Down
TNFAIP8L3	-1.51038	6.99143	-12.0367	1.85482e-28	7.97468e-27	53.864	Down
PRICKLE1	-1.51209	7.80086	-12.0364	1.85906e-28	7.97468e-27	53.8618	Down
HTR7	-1.59513	4.26129	-12.0361	1.86401e-28	7.97752e-27	53.8592	Down
MMRN1	-2.09686	7.93291	-12.0357	1.87134e-28	7.99052e-27	53.8553	Down
ZNF626	-1.51926	7.21905	-12.0339	1.90031e-28	8.09565e-27	53.8401	Down
ELMO1	-1.17887	10.413	-12.0281	2.00023e-28	8.50188e-27	53.7894	Down
ATP8B4	-1.22029	7.51984	-12.025	2.05523e-28	8.71577e-27	53.7626	Down
ZFHX4	-1.98566	8.46057	-12.0223	2.10406e-28	8.90258e-27	53.7394	Down
LURAP1	-1.39539	5.26501	-12.0219	2.11139e-28	8.91334e-27	53.736	Down
ZNF385D	-1.74862	6.7095	-12.0151	2.23993e-28	9.41328e-27	53.6776	Down
PNMA8A	-2.10819	6.60375	-12.0135	2.27314e-28	9.5313e-27	53.663	Down
ZNF540	-1.27458	5.83831	-12.0045	2.45866e-28	1.0263e-26	53.5855	Down
CCDC69	-1.49598	10.8444	-12.0003	2.54949e-28	1.06183e-26	53.5497	Down
FIGN	-1.7622	7.25008	-11.9927	2.72565e-28	1.13266e-26	53.4836	Down
ARMCX1	-1.31636	8.30718	-11.9848	2.92059e-28	1.20828e-26	53.4154	Down
SLC24A3	-1.58079	9.36108	-11.9694	3.33953e-28	1.37854e-26	53.2829	Down
GALNT17	-1.69541	6.76476	-11.9597	3.63613e-28	1.49765e-26	53.1988	Down
ANGPTL7	-2.01949	4.39388	-11.9581	3.68821e-28	1.51575e-26	53.1848	Down
ATP2B4	-1.28359	13.0909	-11.9562	3.75013e-28	1.5378e-26	53.1683	Down
DGKI	-1.47233	6.62538	-11.951	3.92153e-28	1.60455e-26	53.1242	Down
GIMAP8	-1.20087	9.14304	-11.9458	4.10629e-28	1.67646e-26	53.0787	Down
ATM	-1.02313	11.5644	-11.9455	4.11688e-28	1.67711e-26	53.0761	Down
ZBTB20	-1.27181	9.48458	-11.9434	4.19007e-28	1.7032e-26	53.0587	Down
KLHL4	-1.75757	5.41774	-11.9426	4.21988e-28	1.71009e-26	53.0517	Down
MYLK	-1.98408	13.1467	-11.9425	4.2254e-28	1.71009e-26	53.0504	Down
AMOTL1	-1.40878	11.3749	-11.9415	4.26058e-28	1.72059e-26	53.0422	Down
PRPH2	-1.3632	5.78002	-11.9413	4.27063e-28	1.72092e-26	53.0399	Down
GREB1	-1.62225	7.8397	-11.9408	4.28648e-28	1.72357e-26	53.0362	Down
CNRIP1	-1.12204	8.76685	-11.9365	4.45101e-28	1.78587e-26	52.999	Down
MGP	-1.93369	12.7768	-11.9342	4.54359e-28	1.8191e-26	52.9787	Down
CC2D2B	-1.41678	3.24587	-11.9331	4.58697e-28	1.83252e-26	52.9693	Down
INMT-MINDY4	-1.57513	1.62333	-11.9276	4.81099e-28	1.9179e-26	52.9221	Down
ZNF418	-1.61947	6.05096	-11.926	4.87696e-28	1.94005e-26	52.9087	Down
PDE7B	-1.67652	7.78996	-11.9193	5.17007e-28	2.05227e-26	52.851	Down
EDNRA	-1.334	10.1325	-11.9172	5.26814e-28	2.08674e-26	52.8324	Down
DAAM2	-1.567	9.90382	-11.9089	5.66358e-28	2.23862e-26	52.7609	Down
ADGRL2	-1.30368	10.8971	-11.9075	5.73427e-28	2.26176e-26	52.7487	Down
WNT9B	-1.59214	3.09293	-11.9055	5.8305e-28	2.29485e-26	52.7322	Down
SFRP1	-2.726	8.20247	-11.9026	5.98236e-28	2.34966e-26	52.7068	Down
ANKRD33B	-1.56351	7.79384	-11.9014	6.04726e-28	2.37014e-26	52.6961	Down
RAB30	-1.05778	10.0949	-11.8992	6.16105e-28	2.40527e-26	52.6777	Down
PRDM6	-1.61579	6.96664	-11.8992	6.16273e-28	2.40527e-26	52.6775	Down
S1PR1	-1.23889	10.5973	-11.896	6.33557e-28	2.46756e-26	52.6501	Down
IGFBP5	-1.54559	14.6377	-11.8957	6.35315e-28	2.46924e-26	52.6474	Down
ANKRD35	-1.431	6.80964	-11.893	6.50618e-28	2.52345e-26	52.6239	Down
SGIP1	-1.183	8.55259	-11.8918	6.5745e-28	2.54464e-26	52.6135	Down
PLXNA4	-2.01815	8.27409	-11.8872	6.83956e-28	2.64174e-26	52.5745	Down
ZNF727	-2.01798	3.59406	-11.8863	6.89444e-28	2.65194e-26	52.5666	Down
GNAO1	-2.18501	8.84544	-11.8861	6.90917e-28	2.65212e-26	52.5645	Down
CYP1B1	-2.29943	9.86454	-11.8852	6.9579e-28	2.66533e-26	52.5575	Down
XKR4	-2.19495	4.85749	-11.8822	7.14276e-28	2.73053e-26	52.5316	Down
SSPN	-1.47202	10.2466	-11.877	7.47431e-28	2.85142e-26	52.4868	Down
TMEM35A	-2.39685	5.31987	-11.8747	7.62917e-28	2.89862e-26	52.4665	Down
MAGI2	-1.32247	7.77857	-11.8727	7.76155e-28	2.94291e-26	52.4495	Down
EMCN	-1.19375	9.48538	-11.8707	7.89991e-28	2.98928e-26	52.4321	Down
FAM124B	-1.42374	6.40655	-11.8662	8.21465e-28	3.10207e-26	52.3935	Down
KLF17	-1.8678	3.33462	-11.8623	8.49781e-28	3.2025e-26	52.36	Down
NECAB1	-1.765	6.48449	-11.8619	8.52495e-28	3.20624e-26	52.3568	Down
LTBP2	-1.42188	12.5966	-11.8561	8.96375e-28	3.36448e-26	52.3072	Down
COL8A2	-1.58372	9.30081	-11.8558	8.98884e-28	3.36711e-26	52.3045	Down
DISC1	-1.01041	8.24395	-11.8515	9.33571e-28	3.49002e-26	52.2671	Down
PTGER3	-1.91607	8.24418	-11.8414	1.0191e-27	3.79452e-26	52.1804	Down
TNS2	-1.1662	11.9636	-11.8335	1.09088e-27	4.05366e-26	52.1132	Down
EFS	-1.43181	8.08948	-11.8331	1.09534e-27	4.0566e-26	52.1092	Down
ARHGEF33	-1.30929	4.37196	-11.833	1.09602e-27	4.0566e-26	52.1085	Down
LGI4	-1.36109	7.2711	-11.8318	1.10758e-27	4.09122e-26	52.0982	Down
ITIH5	-1.67269	10.209	-11.8298	1.12648e-27	4.15282e-26	52.0814	Down
CLMP	-1.73626	9.82866	-11.8294	1.13105e-27	4.16142e-26	52.0774	Down
TMEM273	-1.21512	8.16221	-11.8277	1.14719e-27	4.2061e-26	52.0635	Down
ADARB1	-1.03343	10.1886	-11.8227	1.19872e-27	4.38439e-26	52.02	Down
PTGFR	-1.76689	6.96931	-11.8156	1.27475e-27	4.65334e-26	51.9593	Down
NRIP2	-1.06412	8.02106	-11.8079	1.36252e-27	4.964e-26	51.8935	Down
PARP15	-1.67471	7.8503	-11.804	1.40983e-27	5.12632e-26	51.8598	Down
FHL1	-1.98216	11.4582	-11.7983	1.48152e-27	5.3765e-26	51.8107	Down
DOCK10	-1.34838	9.77626	-11.7978	1.4882e-27	5.39024e-26	51.8063	Down
BVES	-1.80556	8.16439	-11.7968	1.50032e-27	5.42359e-26	51.7983	Down
ZNF853	-1.6622	8.42339	-11.7926	1.55671e-27	5.61652e-26	51.7618	Down
PPFIA2	-1.60464	5.19645	-11.7908	1.58114e-27	5.69365e-26	51.7464	Down
PDE1B	-1.39523	7.62228	-11.7903	1.58805e-27	5.70748e-26	51.7421	Down
OMD	-2.49549	7.17082	-11.7894	1.60037e-27	5.74068e-26	51.7345	Down
FEZ1	-1.23944	8.59396	-11.7856	1.6536e-27	5.9202e-26	51.7022	Down
CCDC180	-1.66757	4.8771	-11.783	1.69172e-27	6.04507e-26	51.6796	Down
KCNQ5	-1.81152	4.96861	-11.7775	1.7749e-27	6.31802e-26	51.6322	Down
EBF3	-1.48798	7.0923	-11.77	1.89303e-27	6.72568e-26	51.5686	Down
NR2F1	-1.55583	10.3007	-11.7668	1.94738e-27	6.90561e-26	51.5406	Down
PCDHGB7	-1.40363	7.89806	-11.7654	1.97098e-27	6.97599e-26	51.5287	Down
CSRP2	-1.13385	9.02667	-11.7639	1.99588e-27	7.05072e-26	51.5163	Down
RELN	-2.26054	6.36035	-11.7597	2.07046e-27	7.30033e-26	51.48	Down
LDB3	-2.25094	7.25336	-11.7547	2.16167e-27	7.60752e-26	51.4374	Down
PCDHGA12	-1.49142	7.16053	-11.7507	2.23893e-27	7.86455e-26	51.4027	Down
SMIM10	-1.41468	7.44554	-11.7458	2.33575e-27	8.18919e-26	51.3609	Down
COL8A1	-1.91652	11.4842	-11.7435	2.38243e-27	8.33715e-26	51.3414	Down
SIGLEC6	-1.98627	5.4443	-11.7425	2.40255e-27	8.39178e-26	51.3331	Down
SYPL2	-1.67648	6.1826	-11.741	2.43367e-27	8.48457e-26	51.3203	Down
FAM107A	-1.65213	8.20954	-11.7407	2.44052e-27	8.49254e-26	51.3176	Down
SYNPO2	-2.63061	12.0148	-11.739	2.47683e-27	8.60282e-26	51.303	Down
NUDT10	-1.94492	3.97717	-11.7382	2.49316e-27	8.64343e-26	51.2965	Down
KCTD7	-1.01852	9.3134	-11.7279	2.72641e-27	9.41697e-26	51.2081	Down
ADAMTS3	-1.29095	6.13309	-11.7175	2.98285e-27	1.02646e-25	51.1193	Down
PLXNC1	-1.28035	10.55	-11.714	3.07507e-27	1.05625e-25	51.0892	Down
FSTL1	-1.24173	13.8142	-11.7117	3.13783e-27	1.07582e-25	51.0693	Down
LPP	-1.23395	14.5036	-11.7103	3.17376e-27	1.08575e-25	51.058	Down
DLG4	-1.06424	9.01756	-11.7102	3.17845e-27	1.08575e-25	51.0565	Down
SCHIP1	-1.39123	5.66727	-11.7086	3.22268e-27	1.09884e-25	51.0429	Down
MYH10	-1.41433	11.3656	-11.7059	3.29704e-27	1.12214e-25	51.0204	Down
MAF	-1.12355	11.2952	-11.7032	3.37482e-27	1.14443e-25	50.9973	Down
DTNA	-1.9971	8.04303	-11.6974	3.54979e-27	1.19939e-25	50.9474	Down
CEP295NL	-1.37206	4.42364	-11.6895	3.79837e-27	1.28106e-25	50.8805	Down
ZNF662	-1.74091	6.64888	-11.6863	3.90553e-27	1.31481e-25	50.853	Down
SEPTIN4	-1.00742	8.52806	-11.676	4.27108e-27	1.43528e-25	50.7646	Down
ADAMTSL1	-1.4658	8.26441	-11.6755	4.28817e-27	1.43843e-25	50.7607	Down
EFHD1	-1.30744	8.46701	-11.6728	4.39101e-27	1.47028e-25	50.7373	Down
CD302	-1.33676	9.12288	-11.6684	4.56141e-27	1.51914e-25	50.6996	Down
CFAP54	-1.40854	5.4721	-11.6661	4.65094e-27	1.54619e-25	50.6804	Down
GLI1	-1.64838	7.77836	-11.6612	4.85124e-27	1.60867e-25	50.6388	Down
CASQ2	-2.52927	6.31814	-11.6611	4.85616e-27	1.60867e-25	50.6378	Down
ZSCAN18	-1.56138	8.76556	-11.6587	4.95811e-27	1.63952e-25	50.6173	Down
ASPA	-1.73864	6.12598	-11.6583	4.9759e-27	1.64066e-25	50.6137	Down
BACH2	-1.57821	7.58742	-11.6582	4.97918e-27	1.64066e-25	50.6131	Down
ZNF43	-1.55835	8.89309	-11.6563	5.06116e-27	1.66473e-25	50.5969	Down
ZKSCAN7	-1.29864	6.46403	-11.6551	5.11237e-27	1.67861e-25	50.587	Down
MAP1B	-1.50308	11.6369	-11.6521	5.25e-27	1.72076e-25	50.5607	Down
GPRASP2	-1.13185	7.98579	-11.6433	5.66383e-27	1.85314e-25	50.4858	Down
CNTN2	-1.99494	4.50186	-11.6428	5.68503e-27	1.85681e-25	50.4821	Down
PYGM	-1.73659	6.63747	-11.6356	6.05226e-27	1.97329e-25	50.4203	Down
ADGRA2	-1.31274	11.7533	-11.6323	6.22513e-27	2.0261e-25	50.3924	Down
SLC45A1	-1.29029	6.49584	-11.6238	6.69614e-27	2.1756e-25	50.3204	Down
PLPP1	-1.00526	10.9397	-11.619	6.98064e-27	2.26409e-25	50.2793	Down
MEIS1	-1.32369	10.0163	-11.6148	7.23631e-27	2.34293e-25	50.2437	Down
NLGN1	-2.30519	5.39956	-11.6039	7.95484e-27	2.56664e-25	50.1502	Down
JPH4	-1.40034	4.93917	-11.6024	8.05248e-27	2.58917e-25	50.1382	Down
LAYN	-1.32303	8.39665	-11.602	8.08586e-27	2.59542e-25	50.1341	Down
DLC1	-1.16068	11.1198	-11.6008	8.17018e-27	2.61797e-25	50.1238	Down
STUM	-2.49329	6.42085	-11.5939	8.6661e-27	2.77211e-25	50.0656	Down
SERPING1	-1.3263	13.7802	-11.5936	8.68654e-27	2.77388e-25	50.0633	Down
AKAP6	-1.82199	8.1026	-11.5899	8.97321e-27	2.85563e-25	50.0312	Down
SSC5D	-1.81425	10.0624	-11.5801	9.7567e-27	3.09967e-25	49.9485	Down
SV2B	-1.84508	6.62976	-11.5737	1.03159e-26	3.26619e-25	49.8934	Down
GPR155	-1.38838	9.82687	-11.564	1.12082e-26	3.54268e-25	49.8115	Down
TCEAL7	-1.40712	6.21497	-11.5601	1.15887e-26	3.65672e-25	49.7785	Down
EHD3	-1.111	9.49886	-11.5552	1.20864e-26	3.80732e-25	49.737	Down
SUSD5	-1.75815	6.21393	-11.5542	1.21988e-26	3.83625e-25	49.7278	Down
CPE	-1.64984	10.1761	-11.5524	1.23824e-26	3.8874e-25	49.7131	Down
FBLN1	-1.98204	12.6483	-11.5508	1.2551e-26	3.93248e-25	49.6997	Down
ARHGEF17	-1.13036	11.5905	-11.5468	1.29982e-26	4.06021e-25	49.6651	Down
TMCC2	-1.15222	6.86582	-11.5406	1.37077e-26	4.2675e-25	49.6126	Down
FBN1	-1.52155	12.7822	-11.5381	1.40066e-26	4.35327e-25	49.5913	Down
TSHZ2	-1.44996	10.2251	-11.5373	1.40994e-26	4.37482e-25	49.5848	Down
KIRREL3	-1.60989	4.51238	-11.5277	1.53147e-26	4.74398e-25	49.5031	Down
GPR17	-1.8416	4.76762	-11.5268	1.54303e-26	4.77187e-25	49.4957	Down
GIMAP1	-1.17934	8.3756	-11.5252	1.56413e-26	4.8291e-25	49.4823	Down
C8orf88	-1.94958	5.2295	-11.5238	1.5831e-26	4.87957e-25	49.4704	Down
EXTL1	-1.60192	4.20351	-11.5219	1.60992e-26	4.93771e-25	49.4538	Down
FOXP2	-2.23678	8.02226	-11.5147	1.7123e-26	5.21733e-25	49.3929	Down
DEFB124	-1.37023	1.66147	-11.5122	1.74905e-26	5.32059e-25	49.3719	Down
NBEA	-2.0539	8.38171	-11.5105	1.77405e-26	5.38784e-25	49.3579	Down
ABCD2	-1.68281	5.907	-11.5103	1.77818e-26	5.39159e-25	49.3556	Down
CD1D	-1.26477	6.82669	-11.5073	1.8248e-26	5.52396e-25	49.33	Down
SYT15	-1.49345	4.55144	-11.5051	1.85921e-26	5.61897e-25	49.3115	Down
USP44	-1.45254	4.87082	-11.5004	1.93595e-26	5.84142e-25	49.2716	Down
KIAA1755	-1.43325	8.82833	-11.498	1.97489e-26	5.94928e-25	49.2519	Down
ARMH4	-1.20657	7.66166	-11.497	1.99302e-26	5.9942e-25	49.2429	Down
SORCS1	-2.40833	4.84367	-11.495	2.02762e-26	6.08842e-25	49.2259	Down
F2R	-1.09775	12.1581	-11.4886	2.14183e-26	6.421e-25	49.1718	Down
TMEM130	-2.00967	6.37757	-11.4864	2.182e-26	6.53092e-25	49.1534	Down
GIMAP5	-1.39208	6.62911	-11.4829	2.24945e-26	6.722e-25	49.1233	Down
MYCT1	-1.04854	8.60898	-11.4747	2.41318e-26	7.19971e-25	49.0539	Down
LAMA4	-1.1363	12.4876	-11.4744	2.41906e-26	7.20569e-25	49.0515	Down
PLPP7	-1.38126	6.57775	-11.4733	2.44086e-26	7.25904e-25	49.0427	Down
SH3BGRL	-1.05527	12.7024	-11.4686	2.54193e-26	7.54756e-25	49.0026	Down
ASB2	-1.95632	8.52923	-11.4631	2.66321e-26	7.8896e-25	48.9565	Down
DCN	-1.4652	13.8744	-11.463	2.6656e-26	7.8896e-25	48.9557	Down
CASQ1	-1.93647	3.83831	-11.4594	2.75002e-26	8.11366e-25	48.9249	Down
ROBO1	-1.23495	11.0823	-11.4591	2.75672e-26	8.12054e-25	48.9225	Down
BEX4	-1.38304	8.96116	-11.4588	2.76408e-26	8.12938e-25	48.9198	Down
FRY	-1.19761	10.3561	-11.4509	2.95816e-26	8.67276e-25	48.8528	Down
TMEM255A	-1.60372	6.90361	-11.4469	3.05915e-26	8.95475e-25	48.8196	Down
MCF2L2	-1.01829	6.47162	-11.4463	3.07665e-26	8.99184e-25	48.814	Down
GRIA1	-1.98086	3.64196	-11.4423	3.18373e-26	9.29019e-25	48.7802	Down
SORBS1	-1.87538	12.0614	-11.4402	3.24177e-26	9.43001e-25	48.7624	Down
PLN	-2.35035	8.70901	-11.4371	3.32894e-26	9.66847e-25	48.7362	Down
MCTP1	-1.12058	9.30087	-11.436	3.36042e-26	9.74471e-25	48.7269	Down
PALM	-1.60217	9.52377	-11.4255	3.6766e-26	1.06285e-24	48.638	Down
CGNL1	-1.70081	9.09111	-11.4233	3.74581e-26	1.08117e-24	48.6196	Down
KLF9	-1.22047	11.5974	-11.4191	3.88125e-26	1.11853e-24	48.5845	Down
SNTG2	-1.795	3.33291	-11.4189	3.88794e-26	1.11873e-24	48.5828	Down
STOM	-1.01067	13.1384	-11.4156	3.99873e-26	1.14883e-24	48.5551	Down
KCNMA1	-2.31812	10.0239	-11.4154	4.00676e-26	1.14937e-24	48.5531	Down
GLIPR1	-1.22855	10.42	-11.4149	4.02382e-26	1.15248e-24	48.5489	Down
ARHGAP15	-1.24965	8.49881	-11.4098	4.20204e-26	1.20168e-24	48.5061	Down
PDLIM3	-1.71671	11.5548	-11.4089	4.23691e-26	1.20979e-24	48.4979	Down
HSPB6	-2.76439	10.6538	-11.4057	4.35435e-26	1.24142e-24	48.4709	Down
LMOD1	-2.27823	10.7108	-11.4038	4.42245e-26	1.25891e-24	48.4556	Down
SELP	-2.00009	8.51471	-11.4033	4.44403e-26	1.26312e-24	48.4508	Down
NIBAN1	-1.62191	11.5143	-11.4027	4.46737e-26	1.26782e-24	48.4456	Down
NPR1	-1.28434	8.54687	-11.4023	4.48141e-26	1.26987e-24	48.4425	Down
CDH23	-1.47052	7.47742	-11.3973	4.67655e-26	1.32315e-24	48.4004	Down
KLRG1	-1.17741	6.28204	-11.3969	4.69155e-26	1.32538e-24	48.3972	Down
PBX3	-1.06878	10.4752	-11.3958	4.73509e-26	1.33566e-24	48.3881	Down
RDX	-1.17032	11.0599	-11.3944	4.79569e-26	1.3507e-24	48.3756	Down
TSPAN2	-1.69259	9.08619	-11.3802	5.41007e-26	1.51914e-24	48.2565	Down
GREM1	-2.16658	13.3905	-11.3738	5.71541e-26	1.60247e-24	48.2023	Down
TRPC3	-1.14175	5.00547	-11.372	5.80168e-26	1.62275e-24	48.1875	Down
ITGA8	-1.72654	9.28866	-11.372	5.8052e-26	1.62275e-24	48.1869	Down
CEP126	-1.44467	8.18381	-11.3701	5.89777e-26	1.64616e-24	48.1712	Down
LHFPL6	-1.22919	10.5075	-11.3645	6.18469e-26	1.72165e-24	48.1243	Down
KLHDC1	-1.02482	7.2907	-11.3645	6.18674e-26	1.72165e-24	48.124	Down
GPR135	-1.14871	6.89729	-11.357	6.59455e-26	1.8324e-24	48.061	Down
TRIM9	-1.61083	6.01561	-11.3522	6.86926e-26	1.90589e-24	48.0206	Down
NT5C1A	-1.40866	1.72623	-11.3505	6.97244e-26	1.93164e-24	48.0059	Down
ATP1A2	-2.66249	6.81696	-11.3455	7.27215e-26	2.01167e-24	47.9644	Down
ISLR2	-1.70924	6.94211	-11.3431	7.42784e-26	2.04865e-24	47.9434	Down
RNLS	-1.33511	6.43635	-11.3398	7.63405e-26	2.10241e-24	47.9164	Down
SVIL	-1.39233	12.6226	-11.3383	7.73475e-26	2.127e-24	47.9034	Down
SORCS2	-1.68207	7.83307	-11.3348	7.97026e-26	2.18531e-24	47.8738	Down
RGS5	-1.30898	13.7754	-11.331	8.23226e-26	2.25382e-24	47.8419	Down
FAM184A	-1.73261	6.65755	-11.3289	8.37677e-26	2.29002e-24	47.8247	Down
DCHS1	-1.24507	11.2702	-11.3275	8.47885e-26	2.31453e-24	47.8127	Down
TMEM108	-1.19744	6.49173	-11.3249	8.66817e-26	2.36274e-24	47.7909	Down
FZD4	-1.01856	10.5783	-11.3216	8.9178e-26	2.42723e-24	47.7629	Down
S1PR3	-1.42082	10.5542	-11.3171	9.2683e-26	2.51633e-24	47.7248	Down
GLCCI1	-1.01838	9.86661	-11.317	9.27217e-26	2.51633e-24	47.7244	Down
MMRN2	-1.11549	10.6549	-11.3151	9.42248e-26	2.54968e-24	47.7085	Down
ASTN1	-2.44996	4.07568	-11.3132	9.58188e-26	2.5853e-24	47.6919	Down
JAK3	-1.21405	10.5169	-11.3129	9.60395e-26	2.58751e-24	47.6897	Down
FMN2	-2.35514	4.94633	-11.3094	9.89551e-26	2.66221e-24	47.6601	Down
CUBN	-1.24719	6.59543	-11.3082	9.99458e-26	2.68498e-24	47.6503	Down
PCDH9	-2.16013	6.76573	-11.3069	1.01059e-25	2.71096e-24	47.6393	Down
FGF14	-1.96214	5.99545	-11.3059	1.01879e-25	2.72905e-24	47.6314	Down
DPY19L2	-1.67825	5.9459	-11.3046	1.03094e-25	2.7576e-24	47.6197	Down
SLC17A7	-1.58305	5.33129	-11.3022	1.05153e-25	2.80866e-24	47.6001	Down
RAB31	-1.17401	11.9939	-11.3002	1.06965e-25	2.85295e-24	47.5833	Down
PIK3CD	-1.16401	10.1554	-11.3	1.07162e-25	2.85413e-24	47.5814	Down
TACR1	-1.93257	5.27259	-11.297	1.09967e-25	2.92047e-24	47.5559	Down
NLGN3	-1.33695	7.02789	-11.2908	1.15893e-25	3.06911e-24	47.5041	Down
PLPPR4	-1.56823	7.76259	-11.2732	1.34597e-25	3.55937e-24	47.3563	Down
C21orf62	-1.56454	3.8643	-11.2713	1.36739e-25	3.60577e-24	47.3407	Down
CADM3	-2.55781	5.86028	-11.2706	1.37633e-25	3.62422e-24	47.3343	Down
PALLD	-1.30864	13.4447	-11.2687	1.3987e-25	3.67351e-24	47.3184	Down
TCP11L2	-1.06181	9.17109	-11.2686	1.399e-25	3.67351e-24	47.3181	Down
KIAA0408	-1.95344	2.36211	-11.2681	1.40555e-25	3.6855e-24	47.3135	Down
COL21A1	-1.73446	6.45434	-11.2678	1.40878e-25	3.68877e-24	47.3113	Down
ABCA1	-1.0798	11.455	-11.2671	1.41734e-25	3.70598e-24	47.3053	Down
BTBD19	-1.07712	8.29231	-11.2631	1.467e-25	3.83046e-24	47.2713	Down
THBS4	-2.9298	9.53983	-11.2607	1.49603e-25	3.90079e-24	47.2519	Down
ENOX1	-1.34413	7.1879	-11.2557	1.56114e-25	4.05352e-24	47.2098	Down
TMOD2	-1.17059	9.51085	-11.2518	1.61354e-25	4.17792e-24	47.1772	Down
GEM	-1.27581	11.0448	-11.2491	1.65133e-25	4.26984e-24	47.1544	Down
DHH	-1.4534	4.50722	-11.2481	1.66581e-25	4.3013e-24	47.1458	Down
MARCHF1	-1.10129	9.44184	-11.2471	1.67923e-25	4.32994e-24	47.1378	Down
AXL	-1.1494	11.6686	-11.2443	1.72036e-25	4.42375e-24	47.1139	Down
NLRP1	-1.20406	10.1291	-11.2427	1.74307e-25	4.47598e-24	47.101	Down
PHLDB2	-1.4432	10.3517	-11.2362	1.84281e-25	4.70612e-24	47.046	Down
ZBTB16	-2.22405	6.79415	-11.2325	1.90146e-25	4.84925e-24	47.0151	Down
KRBA2	-1.12394	5.28134	-11.2316	1.91654e-25	4.88102e-24	47.0073	Down
MILR1	-1.20972	7.58823	-11.23	1.94258e-25	4.94057e-24	46.994	Down
TENM4	-1.71095	8.65563	-11.2256	2.01623e-25	5.1209e-24	46.9572	Down
TRPS1	-1.38013	9.79678	-11.2235	2.05181e-25	5.20417e-24	46.9399	Down
SEMA3G	-1.27464	8.95885	-11.2188	2.13605e-25	5.41045e-24	46.9002	Down
ZNF532	-1.05191	11.5024	-11.2182	2.14548e-25	5.42696e-24	46.8959	Down
TEAD1	-1.08053	12.0122	-11.2164	2.17945e-25	5.50539e-24	46.8803	Down
PLXDC1	-1.01606	10.1853	-11.2121	2.25999e-25	5.70112e-24	46.8445	Down
NRXN3	-2.13822	8.22688	-11.2075	2.3501e-25	5.92041e-24	46.8059	Down
TM6SF1	-1.30112	6.49304	-11.2038	2.42408e-25	6.09029e-24	46.7753	Down
PDE2A	-1.37328	8.62766	-11.2032	2.43623e-25	6.11258e-24	46.7703	Down
NMUR1	-1.40322	6.36726	-11.1999	2.50546e-25	6.2778e-24	46.7427	Down
CEP85L	-1.09786	8.54261	-11.198	2.54716e-25	6.37373e-24	46.7264	Down
DCLK2	-1.40111	7.69273	-11.1962	2.58634e-25	6.46307e-24	46.7113	Down
ZNF569	-1.25872	7.12059	-11.1943	2.62698e-25	6.55583e-24	46.6959	Down
ZNF366	-1.16906	7.33362	-11.1895	2.7376e-25	6.82274e-24	46.6552	Down
CDC42EP3	-1.22156	11.0623	-11.1887	2.7549e-25	6.85669e-24	46.649	Down
ITGA10	-1.23916	6.76106	-11.1871	2.79284e-25	6.94184e-24	46.6354	Down
CHRDL2	-2.57204	9.62844	-11.1773	3.03455e-25	7.53257e-24	46.5535	Down
GIMAP7	-1.22287	9.05023	-11.172	3.17228e-25	7.86397e-24	46.5096	Down
GIMAP6	-1.14446	9.94018	-11.1657	3.34785e-25	8.26618e-24	46.4565	Down
RCSD1	-1.25805	9.56014	-11.1648	3.37184e-25	8.31437e-24	46.4494	Down
ROR2	-1.73422	9.32849	-11.1636	3.40783e-25	8.39202e-24	46.4389	Down
DOCK4	-1.03039	9.95941	-11.1579	3.57527e-25	8.79271e-24	46.3916	Down
YPEL1	-1.27471	6.74867	-11.1458	3.96021e-25	9.70564e-24	46.2906	Down
KIT	-1.67112	9.11603	-11.1458	3.96073e-25	9.70564e-24	46.2904	Down
FRMD6	-1.28462	10.1884	-11.1457	3.96213e-25	9.70564e-24	46.2901	Down
MYOCD	-2.12373	8.67355	-11.1442	4.01382e-25	9.81936e-24	46.2773	Down
FHL5	-1.36925	6.71958	-11.1339	4.38077e-25	1.0689e-23	46.1909	Down
ITGB1BP2	-1.27067	5.7068	-11.1259	4.6865e-25	1.142e-23	46.1243	Down
TTC7B	-1.02006	9.60995	-11.1192	4.9584e-25	1.20667e-23	46.0686	Down
VEGFC	-1.0387	8.85675	-11.1126	5.24312e-25	1.27264e-23	46.0135	Down
MAMDC2	-2.29849	6.88668	-11.1118	5.27693e-25	1.27918e-23	46.0071	Down
LRRN4CL	-1.50698	7.35912	-11.1063	5.5282e-25	1.3366e-23	45.9612	Down
TMEM252	-2.35768	3.9713	-11.104	5.63568e-25	1.36082e-23	45.9422	Down
NEXN	-1.65066	10.3567	-11.1036	5.65407e-25	1.36349e-23	45.939	Down
PGM5	-2.2773	9.29181	-11.102	5.73043e-25	1.37924e-23	45.9257	Down
COLQ	-1.14934	6.37004	-11.102	5.73417e-25	1.37924e-23	45.9251	Down
SMOC2	-1.92466	11.1967	-11.1008	5.78962e-25	1.39078e-23	45.9156	Down
LRRTM2	-1.07678	5.85334	-11.1006	5.80172e-25	1.39189e-23	45.9135	Down
MSANTD1	-1.1657	4.85049	-11.0929	6.1869e-25	1.48239e-23	45.85	Down
ADGRB3	-2.01252	4.5394	-11.0855	6.58444e-25	1.57561e-23	45.7885	Down
FGL2	-1.61703	11.085	-11.0813	6.82248e-25	1.62839e-23	45.7535	Down
CLEC2D	-1.24471	8.75913	-11.0811	6.8351e-25	1.62931e-23	45.7517	Down
SNAP91	-2.33095	3.92886	-11.0784	6.99513e-25	1.66532e-23	45.7288	Down
CORO2B	-1.43996	6.75029	-11.0769	7.08061e-25	1.68352e-23	45.7168	Down
ZNF793	-1.59352	7.42033	-11.073	7.31899e-25	1.73577e-23	45.6841	Down
ZDBF2	-1.56642	8.29608	-11.0723	7.35998e-25	1.74327e-23	45.6786	Down
RSPO2	-2.30937	5.23005	-11.0681	7.62774e-25	1.80439e-23	45.6433	Down
GJC1	-1.31965	9.41762	-11.0665	7.7279e-25	1.82482e-23	45.6304	Down
GGTA1	-1.29207	7.73287	-11.0664	7.73369e-25	1.82482e-23	45.6297	Down
JHY	-1.37627	7.08449	-11.0663	7.74467e-25	1.82509e-23	45.6283	Down
PECAM1	-1.07711	13.164	-11.0643	7.87338e-25	1.84841e-23	45.612	Down
TMTC1	-1.53206	9.90312	-11.0633	7.94353e-25	1.86253e-23	45.6033	Down
CTSO	-1.03545	10.8973	-11.0619	8.03721e-25	1.88212e-23	45.5917	Down
KCNB1	-2.46379	5.67651	-11.0603	8.14685e-25	1.9054e-23	45.5783	Down
HGF	-1.46427	8.57215	-11.0594	8.20846e-25	1.9174e-23	45.5709	Down
GNG2	-1.06892	9.93335	-11.0551	8.5093e-25	1.98518e-23	45.5353	Down
TAMALIN	-1.02921	8.88539	-11.0545	8.54868e-25	1.99188e-23	45.5308	Down
SHC4	-1.42372	5.93816	-11.0517	8.75333e-25	2.03701e-23	45.5074	Down
GASK1B	-1.20811	11.791	-11.0489	8.96276e-25	2.08314e-23	45.4841	Down
GCSAML	-1.63689	4.39511	-11.0486	8.98581e-25	2.0859e-23	45.4815	Down
AARD	-1.84599	4.35372	-11.0455	9.22521e-25	2.1388e-23	45.4556	Down
MAP9	-1.45143	8.79853	-11.0445	9.3033e-25	2.15422e-23	45.4472	Down
BCL2	-1.20433	9.41307	-11.0413	9.56006e-25	2.21093e-23	45.4204	Down
ZNF221	-1.34288	6.27376	-11.0392	9.72498e-25	2.24628e-23	45.4035	Down
C1QTNF2	-1.31299	6.26289	-11.0386	9.77726e-25	2.25555e-23	45.3982	Down
C8orf34	-1.26647	5.10211	-11.0363	9.96565e-25	2.29617e-23	45.3793	Down
RYR3	-1.54471	6.68767	-11.035	1.00719e-24	2.31778e-23	45.3689	Down
PIEZO2	-1.27648	8.70947	-11.0342	1.0141e-24	2.33081e-23	45.3621	Down
MAB21L1	-1.78736	3.29186	-11.0327	1.02766e-24	2.35615e-23	45.349	Down
GSTM2	-1.187	8.51407	-11.0288	1.06133e-24	2.42439e-23	45.3172	Down
WDFY4	-1.67506	9.48468	-11.0249	1.09691e-24	2.50259e-23	45.2846	Down
ADAMTS1	-1.34117	11.1942	-11.0205	1.13815e-24	2.59351e-23	45.2482	Down
VENTX	-1.31327	4.8828	-11.0176	1.16626e-24	2.65431e-23	45.2241	Down
DACT3	-1.6798	8.87898	-11.0099	1.24401e-24	2.8229e-23	45.1604	Down
NALCN	-1.90328	6.22354	-11.0098	1.24488e-24	2.8229e-23	45.1597	Down
ITGA7	-1.4813	10.2447	-11.0053	1.29303e-24	2.92851e-23	45.1222	Down
VCAM1	-1.25247	10.5159	-11.0048	1.29913e-24	2.93875e-23	45.1176	Down
ANKRD6	-1.33205	8.07609	-11.0031	1.31783e-24	2.97744e-23	45.1034	Down
PHLDB1	-1.03277	11.5277	-10.999	1.36359e-24	3.07708e-23	45.0697	Down
PCDHGA9	-1.23827	6.73904	-10.9962	1.39625e-24	3.14697e-23	45.0464	Down
LGI1	-2.0072	3.09915	-10.9957	1.40137e-24	3.1547e-23	45.0428	Down
LEPR	-1.35407	9.33622	-10.9948	1.41183e-24	3.17439e-23	45.0354	Down
PHACTR1	-1.10187	8.69228	-10.9937	1.42571e-24	3.20173e-23	45.0258	Down
NACAD	-1.54374	7.19696	-10.9907	1.46219e-24	3.27972e-23	45.0008	Down
CORO6	-1.38512	5.94611	-10.9898	1.47299e-24	3.29996e-23	44.9936	Down
ARHGAP28	-1.393	7.7834	-10.9893	1.47877e-24	3.30892e-23	44.9897	Down
SERTM2	-2.08646	3.6869	-10.985	1.53349e-24	3.42725e-23	44.9538	Down
TPO	-2.16788	4.97827	-10.9831	1.55785e-24	3.47753e-23	44.9382	Down
SPEG	-2.16461	9.20755	-10.9813	1.58172e-24	3.52657e-23	44.9232	Down
FRMPD3	-1.93311	6.03787	-10.9751	1.66541e-24	3.7043e-23	44.8723	Down
KLF12	-1.3515	9.71883	-10.9742	1.67847e-24	3.72889e-23	44.8646	Down
MYO1H	-1.30689	4.25814	-10.9707	1.72876e-24	3.83603e-23	44.8355	Down
ZNF536	-1.99939	4.94912	-10.9652	1.81087e-24	4.00867e-23	44.7897	Down
PTPN13	-1.42934	8.94051	-10.9645	1.82096e-24	4.02145e-23	44.7842	Down
SLCO1C1	-1.32412	4.61668	-10.9645	1.82144e-24	4.02145e-23	44.7839	Down
ABCB1	-1.45352	8.47835	-10.9644	1.82312e-24	4.02145e-23	44.783	Down
SYT15B	-1.52866	3.9581	-10.9639	1.83064e-24	4.03326e-23	44.7789	Down
TBC1D9	-1.0298	10.6881	-10.9589	1.9087e-24	4.20028e-23	44.7377	Down
MAP7D3	-1.16811	9.25433	-10.9577	1.92786e-24	4.23742e-23	44.7279	Down
PCDHGA3	-1.56516	4.47755	-10.9562	1.95181e-24	4.27996e-23	44.7157	Down
ERVFRD-1	-1.48173	3.99906	-10.9549	1.97279e-24	4.32088e-23	44.7051	Down
SLC27A6	-2.02776	3.45263	-10.9541	1.98727e-24	4.34748e-23	44.6979	Down
CCM2L	-1.09426	7.32662	-10.9522	2.01921e-24	4.41215e-23	44.6822	Down
KL	-1.46193	6.80398	-10.951	2.03832e-24	4.4487e-23	44.6729	Down
SPATA9	-1.01887	3.8206	-10.9391	2.25201e-24	4.90359e-23	44.5744	Down
CFL2	-1.30527	10.556	-10.9347	2.3371e-24	5.08292e-23	44.5378	Down
BHLHE22	-1.62183	6.04284	-10.9213	2.61429e-24	5.66566e-23	44.4272	Down
HDGFL3	-1.26463	9.95492	-10.9212	2.61721e-24	5.66566e-23	44.4261	Down
NLRC3	-1.24035	8.8958	-10.9208	2.62498e-24	5.67586e-23	44.4231	Down
KLHL3	-1.19	7.97055	-10.9186	2.67298e-24	5.76218e-23	44.4052	Down
EPB41L3	-1.26842	9.81809	-10.9185	2.67572e-24	5.76218e-23	44.4042	Down
MYH11	-2.7908	14.038	-10.9182	2.68281e-24	5.76218e-23	44.4016	Down
MS4A2	-1.7681	6.73043	-10.917	2.70918e-24	5.80639e-23	44.392	Down
SAMD11	-1.45121	7.79472	-10.917	2.71029e-24	5.80639e-23	44.3916	Down
SKIDA1	-1.27092	5.22064	-10.9136	2.78866e-24	5.96056e-23	44.3634	Down
TULP2	-1.5085	3.50161	-10.9123	2.81961e-24	6.01979e-23	44.3525	Down
VXN	-1.83352	4.13054	-10.9112	2.84371e-24	6.06429e-23	44.3441	Down
ADCYAP1	-2.27359	4.92171	-10.9105	2.86181e-24	6.09591e-23	44.3379	Down
KHDRBS2	-1.78401	2.62355	-10.91	2.87305e-24	6.11286e-23	44.334	Down
HSPB8	-1.83579	9.73777	-10.9077	2.92985e-24	6.2266e-23	44.3147	Down
ITGA1	-1.14183	12.6338	-10.9023	3.06534e-24	6.50327e-23	44.27	Down
WDR17	-2.05115	5.32452	-10.9022	3.06702e-24	6.50327e-23	44.2695	Down
FRZB	-1.59459	9.84522	-10.8994	3.13963e-24	6.64965e-23	44.2464	Down
NKAPL	-1.31888	3.97588	-10.8963	3.22216e-24	6.81434e-23	44.2208	Down
RAI2	-1.45135	9.65829	-10.8962	3.22471e-24	6.81434e-23	44.22	Down
ARMCX4	-1.23496	8.45764	-10.8957	3.23768e-24	6.83401e-23	44.216	Down
GSTM5	-1.50923	6.88149	-10.8945	3.27149e-24	6.89754e-23	44.2058	Down
GYPC	-1.23371	10.0033	-10.8939	3.28607e-24	6.92045e-23	44.2014	Down
CRTAC1	-2.28575	4.90733	-10.8934	3.30157e-24	6.94523e-23	44.1967	Down
ARRDC5	-1.5414	4.9509	-10.8871	3.47996e-24	7.31224e-23	44.1448	Down
KLHL10	-1.48254	2.53113	-10.8812	3.65431e-24	7.66921e-23	44.0965	Down
RASGRF2	-1.00988	9.21816	-10.8786	3.73564e-24	7.823e-23	44.0748	Down
ADCY2	-1.91176	6.90017	-10.8764	3.80339e-24	7.95592e-23	44.0571	Down
PRG4	-1.753	6.19895	-10.8749	3.85153e-24	8.04759e-23	44.0446	Down
MYOZ2	-1.62267	2.49245	-10.8605	4.34308e-24	9.05432e-23	43.9261	Down
TRAF1	-1.00781	9.83995	-10.8579	4.44066e-24	9.24741e-23	43.9041	Down
OTUD7A	-1.20523	6.73907	-10.856	4.50864e-24	9.37847e-23	43.8891	Down
C4B	-1.65004	9.39592	-10.847	4.86002e-24	1.00868e-22	43.8151	Down
PCDHGC3	-1.38086	9.78137	-10.8453	4.93245e-24	1.02144e-22	43.8004	Down
IL16	-1.34695	9.47446	-10.8448	4.95277e-24	1.02451e-22	43.7964	Down
COL4A4	-1.96215	8.3557	-10.8423	5.05427e-24	1.04434e-22	43.7764	Down
IMPG2	-1.25415	4.48432	-10.84	5.15518e-24	1.06401e-22	43.7568	Down
PTH1R	-1.43387	5.27456	-10.8338	5.42769e-24	1.11654e-22	43.706	Down
LRRC4C	-1.7815	4.80956	-10.8312	5.54783e-24	1.14e-22	43.6844	Down
RAB23	-1.29674	9.64835	-10.8255	5.81372e-24	1.19332e-22	43.6382	Down
TMEM100	-2.04651	6.25165	-10.8186	6.15981e-24	1.26201e-22	43.5811	Down
DYNLT5	-1.10824	4.80593	-10.8185	6.16193e-24	1.26201e-22	43.5808	Down
SAMD4A	-1.18056	10.2435	-10.8135	6.42883e-24	1.31342e-22	43.5389	Down
FLT3	-1.65431	5.25829	-10.8134	6.43411e-24	1.31342e-22	43.5381	Down
FLNA	-1.53729	16.0886	-10.8032	6.99878e-24	1.42556e-22	43.4551	Down
KCNIP1	-1.8249	4.43856	-10.8027	7.03192e-24	1.42918e-22	43.4504	Down
PROX2	-1.31263	4.72341	-10.8023	7.05131e-24	1.43156e-22	43.4477	Down
PGBD1	-1.02849	7.56311	-10.7995	7.22138e-24	1.46449e-22	43.4241	Down
ARMCX2	-1.32424	9.23353	-10.7966	7.39813e-24	1.49708e-22	43.4003	Down
INSYN1	-1.64545	6.45265	-10.7854	8.1162e-24	1.63705e-22	43.3088	Down
ANKRD55	-1.39174	4.18143	-10.7797	8.51408e-24	1.71544e-22	43.2616	Down
SYNC	-1.78486	7.37255	-10.7794	8.53572e-24	1.71794e-22	43.2591	Down
TCEAL5	-1.8332	2.52208	-10.7764	8.7461e-24	1.75838e-22	43.2351	Down
ZNF439	-1.2026	7.51846	-10.775	8.84861e-24	1.77707e-22	43.2236	Down
SEMA6C	-1.13186	8.89062	-10.7716	9.1055e-24	1.82473e-22	43.1953	Down
ZBTB47	-1.04223	10.029	-10.7714	9.11791e-24	1.82525e-22	43.194	Down
NFATC4	-1.19214	9.46967	-10.7706	9.18062e-24	1.83583e-22	43.1872	Down
FNDC5	-1.63101	6.0429	-10.7674	9.42716e-24	1.88109e-22	43.161	Down
PDE8B	-1.02165	8.15229	-10.7673	9.43727e-24	1.88109e-22	43.16	Down
CYSLTR2	-1.34231	5.9666	-10.7667	9.47854e-24	1.88729e-22	43.1557	Down
GRID1	-1.57638	6.86181	-10.7636	9.72688e-24	1.93261e-22	43.1302	Down
FOXF1	-1.38385	10.4569	-10.7554	1.04135e-23	2.06682e-22	43.0628	Down
NAALAD2	-1.16934	6.27576	-10.7487	1.10067e-23	2.18223e-22	43.0081	Down
MAP1LC3C	-1.4681	3.35691	-10.748	1.10755e-23	2.19355e-22	43.002	Down
KIAA1614	-1.12224	7.73678	-10.7472	1.11512e-23	2.20618e-22	42.9953	Down
ST8SIA4	-1.0676	9.45537	-10.7465	1.12165e-23	2.21458e-22	42.9895	Down
HFM1	-1.67767	3.98123	-10.7464	1.12182e-23	2.21458e-22	42.9894	Down
CH25H	-1.55317	7.44638	-10.7463	1.12293e-23	2.21458e-22	42.9884	Down
TFEC	-1.40806	8.4546	-10.7403	1.18008e-23	2.32482e-22	42.9394	Down
RGS9	-1.48431	6.28308	-10.7395	1.18845e-23	2.33759e-22	42.9324	Down
TTLL7	-1.77553	8.51969	-10.7393	1.19026e-23	2.33759e-22	42.9309	Down
TCF21	-1.33582	8.29359	-10.7393	1.19033e-23	2.33759e-22	42.9308	Down
DOCK8	-1.21787	10.8691	-10.7367	1.2158e-23	2.38259e-22	42.9099	Down
KLHL6	-1.38916	9.22744	-10.7321	1.26308e-23	2.47004e-22	42.8723	Down
PCDHA3	-1.65016	3.60515	-10.7314	1.27082e-23	2.48257e-22	42.8663	Down
NRK	-2.48095	6.05846	-10.7305	1.28088e-23	2.49697e-22	42.8585	Down
RGS22	-1.67098	4.05976	-10.7298	1.28754e-23	2.50734e-22	42.8534	Down
ZNF559-ZNF177	-1.48848	3.78095	-10.7286	1.30118e-23	2.53125e-22	42.843	Down
SLC22A17	-1.40828	8.77957	-10.726	1.32871e-23	2.57674e-22	42.8223	Down
CAVIN1	-1.21271	13.1693	-10.7235	1.35652e-23	2.6252e-22	42.8019	Down
CYP46A1	-1.21968	5.37186	-10.7171	1.4306e-23	2.7628e-22	42.7494	Down
PARD3B	-1.00672	10.4545	-10.7134	1.47584e-23	2.84723e-22	42.7186	Down
CAP2	-1.47366	9.03237	-10.7096	1.52294e-23	2.93469e-22	42.6876	Down
FCGR2C	-1.51379	6.62469	-10.7094	1.52433e-23	2.93469e-22	42.6867	Down
CDH11	-1.31032	12.0131	-10.706	1.5686e-23	3.0168e-22	42.6585	Down
ZNF880	-1.46273	7.89119	-10.6989	1.66296e-23	3.1884e-22	42.6008	Down
GFRA2	-1.57706	5.43077	-10.6931	1.74542e-23	3.34306e-22	42.5531	Down
RGPD8	-1.26426	5.84349	-10.6885	1.8136e-23	3.46651e-22	42.5152	Down
PIANP	-1.55946	5.52236	-10.6867	1.83956e-23	3.51253e-22	42.5012	Down
CCDC200	-1.0764	6.66243	-10.682	1.91251e-23	3.64807e-22	42.4628	Down
ELOVL4	-1.35767	6.00851	-10.6803	1.93934e-23	3.69546e-22	42.4491	Down
CDK14	-1.29044	9.7663	-10.6678	2.1517e-23	4.09174e-22	42.3465	Down
ATRNL1	-1.8325	5.37501	-10.6617	2.26311e-23	4.29922e-22	42.2967	Down
KRT222	-1.69468	3.20367	-10.6583	2.32649e-23	4.41511e-22	42.2695	Down
SEPTIN6	-1.06011	11.271	-10.6551	2.38993e-23	4.53088e-22	42.2429	Down
SH3BP5	-1.10032	8.56469	-10.6542	2.40667e-23	4.55798e-22	42.236	Down
PINLYP	-1.08604	6.5379	-10.6513	2.46557e-23	4.66479e-22	42.2121	Down
CRHBP	-1.38449	4.08967	-10.6488	2.51654e-23	4.7564e-22	42.192	Down
PPP1R12B	-1.66618	12.6591	-10.648	2.53275e-23	4.78218e-22	42.1856	Down
NPY1R	-2.24019	5.02985	-10.6469	2.55581e-23	4.82082e-22	42.1767	Down
FXYD1	-1.58431	4.89124	-10.646	2.57557e-23	4.85318e-22	42.1691	Down
SLC6A16	-1.41651	6.021	-10.6425	2.65202e-23	4.99217e-22	42.1402	Down
CILP	-2.52484	8.09139	-10.6375	2.76373e-23	5.19721e-22	42.0995	Down
EFCAB13	-1.01148	7.6435	-10.6328	2.87159e-23	5.39458e-22	42.0617	Down
GLP2R	-1.98857	5.825	-10.6314	2.90624e-23	5.44868e-22	42.0499	Down
NRP2	-1.26132	11.5835	-10.6297	2.94634e-23	5.51831e-22	42.0363	Down
GABBR1	-1.29692	9.51263	-10.6296	2.94953e-23	5.51873e-22	42.0353	Down
TNR	-1.8534	4.64614	-10.6258	3.04298e-23	5.68786e-22	42.0045	Down
RCVRN	-1.34503	2.85061	-10.6243	3.08077e-23	5.75272e-22	41.9923	Down
FAM216B	-1.86425	3.94948	-10.6213	3.1576e-23	5.88439e-22	41.968	Down
PDE1C	-1.42583	7.65048	-10.6162	3.29478e-23	6.11554e-22	41.926	Down
SYNPO	-1.14803	12.945	-10.6158	3.30308e-23	6.12484e-22	41.9236	Down
AVPR2	-1.474	5.27244	-10.6143	3.34438e-23	6.19525e-22	41.9113	Down
ADCY4	-1.01516	9.21114	-10.6137	3.36151e-23	6.2208e-22	41.9062	Down
PCDH18	-1.10505	10.5129	-10.6115	3.42366e-23	6.32952e-22	41.8882	Down
CNTN1	-2.44425	7.08187	-10.6102	3.46053e-23	6.39135e-22	41.8776	Down
A1BG	-1.13493	3.76282	-10.6095	3.4798e-23	6.42056e-22	41.8721	Down
PBX1	-1.24985	11.6391	-10.6091	3.49334e-23	6.43915e-22	41.8683	Down
BMPER	-1.7867	5.77427	-10.6088	3.49989e-23	6.44485e-22	41.8664	Down
SIAH3	-1.57822	3.07425	-10.6043	3.63357e-23	6.67122e-22	41.8294	Down
ITIH3	-1.6331	5.60046	-10.6019	3.70444e-23	6.79463e-22	41.8104	Down
LIMS2	-1.4524	10.3011	-10.6005	3.74848e-23	6.86865e-22	41.7987	Down
PPP2R2B	-1.38713	6.21727	-10.5994	3.78212e-23	6.92348e-22	41.7899	Down
LBH	-1.01958	11.6886	-10.599	3.79366e-23	6.93777e-22	41.7869	Down
TIMP2	-1.14484	13.9497	-10.5975	3.843e-23	7.01423e-22	41.7741	Down
TYRP1	-2.1747	6.64588	-10.5942	3.94699e-23	7.19698e-22	41.7478	Down
BEND5	-1.67893	5.71734	-10.594	3.95409e-23	7.20265e-22	41.746	Down
GPR182	-1.19899	3.48518	-10.5939	3.95784e-23	7.20265e-22	41.7451	Down
CBX7	-1.06671	10.4184	-10.5909	4.05566e-23	7.36626e-22	41.721	Down
C3orf18	-1.10668	7.3583	-10.5894	4.10652e-23	7.45137e-22	41.7087	Down
PTGIR	-1.00278	7.85103	-10.5893	4.11123e-23	7.45265e-22	41.7076	Down
LZTS1	-1.22105	9.38098	-10.5853	4.24946e-23	7.68079e-22	41.6749	Down
MAGEE1	-1.46319	6.65339	-10.584	4.29287e-23	7.75172e-22	41.6649	Down
ECRG4	-2.82322	6.37947	-10.5809	4.40476e-23	7.94607e-22	41.6395	Down
SHANK1	-1.41497	5.23694	-10.5801	4.43488e-23	7.98494e-22	41.6328	Down
RBP5	-1.12194	7.44325	-10.5775	4.53085e-23	8.14984e-22	41.6117	Down
DOCK11	-1.21222	10.3592	-10.574	4.66036e-23	8.3747e-22	41.5838	Down
CHIC1	-1.52872	8.76224	-10.5724	4.72368e-23	8.4803e-22	41.5705	Down
KIF5C	-1.28439	6.86454	-10.5685	4.87776e-23	8.74007e-22	41.5389	Down
TMEM200B	-1.30651	7.43692	-10.5665	4.95895e-23	8.877e-22	41.5226	Down
SNED1	-1.2399	9.97637	-10.5627	5.11406e-23	9.1371e-22	41.4922	Down
ZNF610	-1.32484	5.92428	-10.5622	5.1354e-23	9.16641e-22	41.4881	Down
HIC1	-1.18293	10.2983	-10.5611	5.18257e-23	9.24175e-22	41.479	Down
PKD1L1	-1.17223	6.45136	-10.557	5.36344e-23	9.55513e-22	41.4452	Down
PDGFRA	-1.32789	11.5761	-10.5564	5.38902e-23	9.59153e-22	41.4405	Down
ZNF518B	-1.41265	9.23568	-10.5537	5.50979e-23	9.79711e-22	41.4186	Down
GYPE	-1.35144	3.40896	-10.5524	5.56845e-23	9.89196e-22	41.4082	Down
FAM180A	-1.83855	6.14172	-10.5504	5.66149e-23	1.00477e-21	41.3918	Down
CALCRL	-1.10848	10.7144	-10.55	5.67967e-23	1.00703e-21	41.3887	Down
FAT3	-2.01079	5.96679	-10.5487	5.74085e-23	1.01691e-21	41.3781	Down
KLHL33	-1.48834	2.80307	-10.5481	5.77035e-23	1.02117e-21	41.373	Down
BMP6	-1.39114	7.18154	-10.5475	5.79519e-23	1.02459e-21	41.3688	Down
SGCA	-1.95151	6.98412	-10.5457	5.88473e-23	1.03845e-21	41.3537	Down
GAPT	-1.75975	6.77459	-10.5375	6.2922e-23	1.1093e-21	41.2876	Down
PKHD1L1	-1.77174	5.22762	-10.5335	6.50149e-23	1.14187e-21	41.2553	Down
SMARCD3	-1.05075	9.12101	-10.533	6.52907e-23	1.14563e-21	41.2511	Down
PIK3R5	-1.24527	9.07031	-10.5318	6.5936e-23	1.15587e-21	41.2414	Down
NPAS4	-1.62142	3.18417	-10.5298	6.70595e-23	1.17335e-21	41.2247	Down
BTBD18	-1.27396	4.87365	-10.5293	6.73256e-23	1.1769e-21	41.2208	Down
CADM2	-2.27838	4.38577	-10.5282	6.79098e-23	1.186e-21	41.2123	Down
ADCYAP1R1	-2.05026	4.39221	-10.5276	6.82304e-23	1.19048e-21	41.2077	Down
FAM124A	-1.36274	8.36061	-10.5268	6.86829e-23	1.19726e-21	41.2011	Down
FHOD3	-1.51775	7.48918	-10.5264	6.89095e-23	1.20008e-21	41.1979	Down
AKAP12	-1.65005	11.1476	-10.5262	6.90409e-23	1.20125e-21	41.196	Down
TNFSF8	-1.43541	6.91333	-10.5253	6.95481e-23	1.20894e-21	41.1888	Down
GPR183	-1.24166	9.4964	-10.5224	7.12198e-23	1.23685e-21	41.1654	Down
HVCN1	-1.10285	8.52619	-10.5218	7.15738e-23	1.24068e-21	41.1605	Down
ITGB3	-1.26082	7.77298	-10.5197	7.28258e-23	1.26121e-21	41.1434	Down
TMOD1	-1.78449	7.69519	-10.5193	7.3083e-23	1.26449e-21	41.1399	Down
IGDCC4	-1.22819	8.46699	-10.5137	7.65021e-23	1.32241e-21	41.0948	Down
FGF10	-2.1448	5.95713	-10.508	8.01909e-23	1.38361e-21	41.0483	Down
ZFP82	-1.22811	7.2065	-10.5052	8.20573e-23	1.4145e-21	41.0256	Down
CSRNP3	-1.4573	7.05468	-10.5043	8.26034e-23	1.4226e-21	41.019	Down
ACTA2	-1.51836	13.8092	-10.4982	8.68409e-23	1.49419e-21	40.9697	Down
KLHL38	-1.61535	4.42771	-10.4974	8.74143e-23	1.50267e-21	40.9632	Down
TRIM61	-1.25543	3.04599	-10.4943	8.96927e-23	1.53899e-21	40.9378	Down
ADAM19	-1.04864	11.0566	-10.4939	9.00174e-23	1.54188e-21	40.9342	Down
ZNF461	-1.11668	7.29291	-10.4938	9.00263e-23	1.54188e-21	40.9341	Down
P2RX7	-1.10732	8.59531	-10.4902	9.27361e-23	1.58537e-21	40.9049	Down
TACC1	-1.047	13.0655	-10.4817	9.93999e-23	1.6961e-21	40.8364	Down
SLITRK4	-1.70542	4.85622	-10.4816	9.94867e-23	1.6961e-21	40.8355	Down
PCDH19	-1.7193	5.88696	-10.4781	1.02444e-22	1.74173e-21	40.8066	Down
DIPK2B	-1.01627	9.64029	-10.4766	1.03707e-22	1.76159e-21	40.7946	Down
RIMKLB	-1.43025	8.89272	-10.4763	1.03908e-22	1.7618e-21	40.7926	Down
MRGPRF	-1.75653	9.47851	-10.4761	1.04071e-22	1.76295e-21	40.7911	Down
ADAMTS6	-1.17204	7.73183	-10.4707	1.08813e-22	1.84161e-21	40.7471	Down
REEP2	-1.65944	7.078	-10.469	1.10356e-22	1.86434e-21	40.7332	Down
NCAM1	-1.83237	8.06089	-10.4683	1.10982e-22	1.87321e-21	40.7277	Down
GGT5	-1.19125	11.0443	-10.4665	1.12632e-22	1.89935e-21	40.7131	Down
C7	-2.84304	9.44005	-10.4654	1.1359e-22	1.91203e-21	40.7047	Down
NRXN2	-1.84245	7.60145	-10.4653	1.13758e-22	1.91313e-21	40.7033	Down
GPR20	-1.38526	5.4075	-10.4604	1.18365e-22	1.98882e-21	40.6641	Down
HSPB7	-2.42315	8.96854	-10.4582	1.20497e-22	2.02098e-21	40.6465	Down
FGD2	-1.15755	9.07039	-10.4552	1.23474e-22	2.06905e-21	40.6224	Down
ABCA10	-1.40726	6.8781	-10.4539	1.24789e-22	2.08921e-21	40.612	Down
TMEM59L	-1.82508	4.97312	-10.4483	1.30672e-22	2.18573e-21	40.5665	Down
TLR6	-1.23655	7.60061	-10.438	1.42148e-22	2.37342e-21	40.4835	Down
BTK	-1.3327	8.22166	-10.4355	1.45095e-22	2.42045e-21	40.4632	Down
MAK	-1.1047	6.62844	-10.4346	1.46204e-22	2.43678e-21	40.4557	Down
SMAD9	-1.6083	8.94548	-10.4325	1.48741e-22	2.47684e-21	40.4387	Down
JPH2	-2.0582	8.74224	-10.4288	1.5331e-22	2.54837e-21	40.4089	Down
GOLGA8R	-1.28694	3.47756	-10.4284	1.53773e-22	2.55207e-21	40.4059	Down
HEYL	-1.27694	10.5316	-10.4284	1.53807e-22	2.55207e-21	40.4057	Down
THBS1	-1.36762	14.2635	-10.4281	1.5418e-22	2.55598e-21	40.4033	Down
MYLK3	-1.13142	4.29836	-10.4256	1.57273e-22	2.60494e-21	40.3837	Down
LCN6	-1.59379	2.85583	-10.4238	1.59599e-22	2.64112e-21	40.3692	Down
NGFR	-2.37512	7.4313	-10.4216	1.62576e-22	2.688e-21	40.351	Down
UBAP1L	-1.04407	7.0808	-10.4207	1.63677e-22	2.70379e-21	40.3443	Down
EPHA7	-2.43323	6.86828	-10.4188	1.66235e-22	2.74362e-21	40.329	Down
GOLGA8H	-1.13276	3.70211	-10.4183	1.67027e-22	2.75425e-21	40.3243	Down
CAMK1D	-1.24541	10.1238	-10.4155	1.70861e-22	2.81498e-21	40.3019	Down
GPM6B	-1.20617	8.07558	-10.4136	1.735e-22	2.85592e-21	40.2868	Down
P2RY12	-1.75734	4.38137	-10.4129	1.74463e-22	2.86923e-21	40.2814	Down
GLRB	-1.52933	6.3436	-10.4105	1.77934e-22	2.92191e-21	40.2619	Down
F8	-1.13098	8.73537	-10.4105	1.7798e-22	2.92191e-21	40.2617	Down
DIO2	-1.30133	11.0472	-10.4093	1.79628e-22	2.94638e-21	40.2526	Down
PLEKHO1	-1.06181	10.9739	-10.4089	1.80265e-22	2.95423e-21	40.2491	Down
SLFN12L	-1.30319	7.03382	-10.4058	1.8493e-22	3.02535e-21	40.2239	Down
LRRC32	-1.17748	11.5347	-10.4033	1.88746e-22	3.08506e-21	40.2037	Down
ZNF578	-1.52774	4.32572	-10.4003	1.93335e-22	3.15452e-21	40.18	Down
GLT8D2	-1.16265	9.03878	-10.3973	1.98157e-22	3.23038e-21	40.1557	Down
SCIMP	-1.35829	8.46236	-10.3955	2.01052e-22	3.2747e-21	40.1414	Down
HDC	-1.61639	5.99645	-10.3953	2.01381e-22	3.2772e-21	40.1398	Down
HIPK4	-1.24545	3.53086	-10.3893	2.1148e-22	3.4329e-21	40.0915	Down
PIK3CG	-1.44151	8.71303	-10.3879	2.14008e-22	3.47055e-21	40.0798	Down
SYDE1	-1.04371	10.1026	-10.3874	2.14888e-22	3.48179e-21	40.0757	Down
RBM24	-1.74467	5.71686	-10.3869	2.15676e-22	3.49151e-21	40.0721	Down
ACACB	-1.19812	10.5308	-10.3861	2.17106e-22	3.5116e-21	40.0656	Down
CFAP58	-1.30364	3.69227	-10.3827	2.23213e-22	3.60413e-21	40.0382	Down
SSBP2	-1.19871	9.39969	-10.3801	2.28076e-22	3.67627e-21	40.017	Down
HSD17B6	-1.16185	6.62494	-10.3797	2.28786e-22	3.68452e-21	40.0139	Down
KCNA5	-1.63574	5.28318	-10.3794	2.29295e-22	3.68952e-21	40.0117	Down
CCIN	-1.34997	3.27866	-10.3766	2.34502e-22	3.77006e-21	39.9896	Down
ST6GALNAC5	-1.51773	8.08892	-10.3757	2.36294e-22	3.79559e-21	39.9821	Down
PRTG	-1.49547	7.03358	-10.3729	2.41695e-22	3.879e-21	39.9598	Down
AZIN2	-1.02055	7.09607	-10.3704	2.46705e-22	3.95599e-21	39.9395	Down
KLHL14	-2.08663	4.61749	-10.37	2.47581e-22	3.96471e-21	39.936	Down
PCDHGA2	-1.26962	6.18795	-10.3699	2.47675e-22	3.96471e-21	39.9357	Down
NLGN2	-1.12421	10.3604	-10.3676	2.52363e-22	4.03282e-21	39.9172	Down
PCDHB15	-1.23916	7.1354	-10.3648	2.58151e-22	4.11825e-21	39.8948	Down
FMO2	-2.00484	8.47824	-10.3645	2.58911e-22	4.12684e-21	39.8919	Down
TGFB3	-1.29658	9.44947	-10.3624	2.63369e-22	4.19406e-21	39.875	Down
DNAJB5	-1.34299	9.31426	-10.3594	2.69888e-22	4.28713e-21	39.8509	Down
TNNT3	-1.71128	3.10038	-10.358	2.72884e-22	4.32733e-21	39.84	Down
KCNE4	-1.39834	8.69038	-10.3577	2.73667e-22	4.33605e-21	39.8372	Down
OLFML3	-1.30631	10.4468	-10.3559	2.77687e-22	4.39599e-21	39.8228	Down
ARHGEF26	-1.66989	8.57031	-10.3547	2.80257e-22	4.43292e-21	39.8137	Down
MPPED2	-1.22472	5.9516	-10.3546	2.80659e-22	4.43551e-21	39.8123	Down
NTN1	-1.68089	9.99041	-10.3508	2.89495e-22	4.57126e-21	39.7817	Down
SRPX	-1.55293	8.53004	-10.35	2.91378e-22	4.5971e-21	39.7753	Down
TNN	-1.90497	6.21138	-10.3496	2.92205e-22	4.60624e-21	39.7725	Down
KERA	-2.03078	3.33663	-10.3476	2.9693e-22	4.67677e-21	39.7567	Down
DSE	-1.00407	10.467	-10.3474	2.97466e-22	4.68126e-21	39.7549	Down
VGLL3	-1.49679	9.18465	-10.3463	3.00258e-22	4.71722e-21	39.7457	Down
SLITRK5	-2.35922	5.44913	-10.3441	3.05685e-22	4.79439e-21	39.7281	Down
RIPOR2	-1.34513	8.90511	-10.3388	3.19051e-22	4.9998e-21	39.6858	Down
NTRK1	-1.25294	4.64843	-10.3347	3.29755e-22	5.15887e-21	39.6533	Down
STMN2	-2.25183	5.41116	-10.3277	3.49255e-22	5.45934e-21	39.5966	Down
ZNF491	-1.05056	5.55461	-10.3227	3.63582e-22	5.66902e-21	39.5569	Down
MAFB	-1.11049	11.09	-10.3175	3.79417e-22	5.90603e-21	39.5149	Down
SOGA1	-1.14402	12.044	-10.3171	3.80445e-22	5.91215e-21	39.5122	Down
POPDC2	-1.55965	7.42326	-10.3156	3.85191e-22	5.98091e-21	39.5	Down
TXNDC2	-1.2961	2.7381	-10.3151	3.86917e-22	6.00269e-21	39.4956	Down
FOXF2	-1.39647	9.62335	-10.3127	3.94416e-22	6.10885e-21	39.4766	Down
CSDC2	-1.5628	6.67169	-10.3118	3.97252e-22	6.14256e-21	39.4696	Down
MOV10L1	-1.30388	5.15362	-10.3112	3.99326e-22	6.1695e-21	39.4644	Down
CNTNAP3B	-1.79985	5.12001	-10.3042	4.22469e-22	6.52164e-21	39.4089	Down
TMEM74	-1.47298	3.25935	-10.2998	4.3774e-22	6.75178e-21	39.3738	Down
TSC22D3	-1.13778	11.9824	-10.2899	4.74362e-22	7.29851e-21	39.2946	Down
TRABD2B	-1.57675	7.7085	-10.2877	4.83017e-22	7.41941e-21	39.2767	Down
PLAGL1	-1.22487	10.0654	-10.2813	5.08688e-22	7.79443e-21	39.2257	Down
LTBP3	-1.0893	12.7675	-10.279	5.18513e-22	7.93192e-21	39.2068	Down
GOLGA8N	-1.19537	5.12273	-10.278	5.22682e-22	7.98914e-21	39.1989	Down
CLEC2B	-1.01062	9.04826	-10.2754	5.33494e-22	8.14771e-21	39.1787	Down
CCDC8	-1.61327	7.74621	-10.2679	5.67257e-22	8.63501e-21	39.1182	Down
TAC4	-1.25789	3.71315	-10.2548	6.30521e-22	9.57456e-21	39.0139	Down
RARB	-1.06493	8.33967	-10.2412	7.04061e-22	1.06739e-20	38.9051	Down
NCKAP1L	-1.28461	10.5823	-10.24	7.10583e-22	1.07552e-20	38.896	Down
PCYT1B	-1.74462	4.56509	-10.236	7.33841e-22	1.10892e-20	38.8642	Down
PTPN5	-1.70985	5.07442	-10.232	7.58133e-22	1.1447e-20	38.8321	Down
NXPH3	-1.96714	6.69003	-10.2318	7.59341e-22	1.1456e-20	38.8305	Down
SLC35F1	-1.49657	5.75544	-10.2298	7.71555e-22	1.16308e-20	38.8148	Down
PTPRD	-1.57331	7.31173	-10.2288	7.77752e-22	1.17053e-20	38.8069	Down
SCRG1	-2.38517	6.58154	-10.2263	7.93789e-22	1.19357e-20	38.7867	Down
CBX6	-1.29939	11.5209	-10.2262	7.94348e-22	1.19357e-20	38.7861	Down
ADAMTS18	-1.61933	5.46127	-10.2257	7.97624e-22	1.19753e-20	38.782	Down
FGD5	-1.07667	10.4003	-10.2208	8.29688e-22	1.24467e-20	38.7431	Down
KIF5A	-1.7042	5.82702	-10.219	8.42443e-22	1.26177e-20	38.7281	Down
PCDHB5	-1.82318	6.38865	-10.2184	8.46384e-22	1.26665e-20	38.7235	Down
ASXL3	-1.62522	5.49036	-10.2169	8.56438e-22	1.27759e-20	38.7118	Down
ADRA1A	-1.43698	3.85504	-10.2168	8.57593e-22	1.27829e-20	38.7105	Down
DLGAP2	-1.52496	3.14491	-10.2161	8.62026e-22	1.28387e-20	38.7054	Down
TSPAN32	-1.57689	5.73983	-10.2145	8.73296e-22	1.29857e-20	38.6926	Down
KCNMB1	-1.70461	9.27229	-10.2121	8.90582e-22	1.32322e-20	38.6733	Down
MMP21	-1.17649	2.3877	-10.2118	8.92907e-22	1.32562e-20	38.6707	Down
MFAP5	-1.91373	9.43459	-10.2076	9.23534e-22	1.3689e-20	38.6374	Down
CECR2	-1.67958	5.16684	-10.2065	9.31961e-22	1.3803e-20	38.6285	Down
CD200	-1.00898	9.074	-10.2058	9.36905e-22	1.38652e-20	38.6233	Down
BEND4	-1.94977	4.73277	-10.2032	9.56474e-22	1.41435e-20	38.6029	Down
PREX1	-1.05369	11.411	-10.2031	9.57758e-22	1.41513e-20	38.6015	Down
ACTN2	-2.13076	4.81794	-10.201	9.73556e-22	1.43733e-20	38.5854	Down
APBA1	-1.03983	8.46871	-10.2006	9.76954e-22	1.4412e-20	38.582	Down
CCL14	-1.59883	5.57563	-10.1981	9.97138e-22	1.46886e-20	38.5618	Down
ISM1	-1.95862	7.32674	-10.1981	9.97284e-22	1.46886e-20	38.5617	Down
FAM43B	-1.63626	4.30938	-10.1956	1.01729e-21	1.49649e-20	38.5421	Down
SPDYE1	-1.00759	6.22575	-10.1949	1.0228e-21	1.5017e-20	38.5367	Down
SCN3A	-1.53645	6.098	-10.1941	1.02979e-21	1.51076e-20	38.53	Down
LEFTY2	-1.92474	3.88898	-10.1928	1.04032e-21	1.52382e-20	38.52	Down
REM1	-1.15837	6.70955	-10.1898	1.06566e-21	1.55971e-20	38.4962	Down
TRANK1	-1.00491	11.0901	-10.1878	1.0829e-21	1.58244e-20	38.4804	Down
TCEAL2	-2.71034	5.2367	-10.1823	1.13231e-21	1.65076e-20	38.4364	Down
TESPA1	-1.35542	7.23839	-10.174	1.21121e-21	1.76108e-20	38.37	Down
NIBAN3	-1.92501	5.79649	-10.1739	1.21125e-21	1.76108e-20	38.3699	Down
SHISAL2A	-1.54548	5.79323	-10.1732	1.21889e-21	1.77005e-20	38.3638	Down
CHST8	-1.66007	3.49805	-10.1719	1.23162e-21	1.78715e-20	38.3535	Down
FOXI2	-1.54318	2.6205	-10.1702	1.24888e-21	1.81077e-20	38.3398	Down
EDIL3	-1.10652	10.8886	-10.1658	1.29317e-21	1.87354e-20	38.3054	Down
CACNA2D1	-1.43552	9.64306	-10.1656	1.29594e-21	1.87609e-20	38.3033	Down
GOLGA8M	-1.16752	1.67801	-10.1632	1.32076e-21	1.91053e-20	38.2846	Down
EMILIN1	-1.28217	12.4921	-10.163	1.32253e-21	1.91161e-20	38.2833	Down
GUCY1A2	-1.1377	8.65929	-10.1628	1.32508e-21	1.91381e-20	38.2814	Down
GALR1	-1.63353	2.2732	-10.1524	1.4402e-21	2.07685e-20	38.1992	Down
IPCEF1	-1.20775	7.23929	-10.1455	1.5234e-21	2.1932e-20	38.1438	Down
CCDC136	-1.67087	7.5064	-10.1446	1.53383e-21	2.20505e-20	38.1371	Down
SCUBE3	-1.26024	7.9805	-10.1426	1.55894e-21	2.23596e-20	38.1211	Down
FGFR1	-1.30746	11.3675	-10.1422	1.56422e-21	2.24181e-20	38.1177	Down
OPRL1	-1.17007	6.18996	-10.1407	1.58272e-21	2.26483e-20	38.1061	Down
UNC5C	-1.19381	8.43902	-10.1389	1.6058e-21	2.29434e-20	38.0919	Down
TMEM200C	-1.28584	6.56649	-10.1377	1.62195e-21	2.31564e-20	38.082	Down
DDIT4L	-1.68192	4.81527	-10.1373	1.6267e-21	2.31885e-20	38.0791	Down
SCARA3	-1.54527	9.89861	-10.1342	1.66835e-21	2.37459e-20	38.0542	Down
KCNJ8	-1.1361	8.74584	-10.1271	1.76602e-21	2.51168e-20	37.9981	Down
DUSP26	-1.78753	4.74926	-10.1253	1.7913e-21	2.5457e-20	37.984	Down
ADAMTS8	-2.05081	7.28274	-10.1237	1.8153e-21	2.57784e-20	37.9709	Down
SLC14A1	-1.38239	6.39084	-10.1216	1.84575e-21	2.61709e-20	37.9545	Down
HOXA4	-1.36486	7.00777	-10.1208	1.8571e-21	2.63077e-20	37.9485	Down
TUBA1A	-1.13337	12.3841	-10.1208	1.85823e-21	2.63077e-20	37.9479	Down
MEOX2	-2.05156	6.29349	-10.1163	1.92635e-21	2.71894e-20	37.9124	Down
PPP1R16B	-1.3146	9.83352	-10.1118	1.99628e-21	2.80912e-20	37.8772	Down
DOCK2	-1.32413	10.0936	-10.1099	2.02736e-21	2.84856e-20	37.862	Down
LDOC1	-1.35764	8.83092	-10.1092	2.03889e-21	2.86259e-20	37.8564	Down
ZNF157	-1.44657	2.43131	-10.108	2.05845e-21	2.88789e-20	37.847	Down
ADH1B	-2.73967	8.35554	-10.1037	2.13177e-21	2.98849e-20	37.8124	Down
CRMP1	-1.1295	8.97091	-10.0983	2.22558e-21	3.1153e-20	37.77	Down
TRIM22	-1.16297	11.4328	-10.0966	2.25624e-21	3.15349e-20	37.7565	Down
MXRA7	-1.12211	11.8523	-10.0959	2.26848e-21	3.16584e-20	37.7511	Down
ELANE	-1.61719	2.85097	-10.0888	2.40227e-21	3.34503e-20	37.6946	Down
PAK3	-1.7291	6.61715	-10.0872	2.43193e-21	3.3838e-20	37.6825	Down
GNG7	-1.33397	8.27172	-10.0806	2.56568e-21	3.56323e-20	37.6297	Down
SGCE	-1.26704	9.52346	-10.0802	2.57262e-21	3.56888e-20	37.6271	Down
CCDC88A	-1.02508	11.0502	-10.0799	2.57839e-21	3.57423e-20	37.6249	Down
ZFP92	-1.37357	6.71275	-10.0793	2.59207e-21	3.59052e-20	37.6197	Down
PLP1	-2.42429	4.97882	-10.0791	2.59649e-21	3.59397e-20	37.618	Down
ARHGAP23	-1.09849	11.565	-10.0756	2.66902e-21	3.69162e-20	37.5908	Down
MAGEH1	-1.02388	8.81149	-10.0749	2.68523e-21	3.71128e-20	37.5848	Down
SLITRK3	-2.09754	3.12793	-10.0718	2.75186e-21	3.79773e-20	37.5607	Down
HSPA12B	-1.01439	8.72723	-10.0684	2.82916e-21	3.89602e-20	37.5333	Down
SOBP	-1.36627	9.06839	-10.0677	2.84471e-21	3.91426e-20	37.5279	Down
STOX2	-1.50173	8.07336	-10.0674	2.8515e-21	3.92071e-20	37.5256	Down
PRKN	-1.24035	6.81591	-10.0657	2.88929e-21	3.9668e-20	37.5126	Down
SEMA3D	-1.94073	6.6395	-10.0638	2.9342e-21	4.0255e-20	37.4974	Down
TUBB6	-1.05519	11.2485	-10.0545	3.16232e-21	4.32253e-20	37.4236	Down
MDGA1	-1.2659	8.14284	-10.0501	3.27526e-21	4.47035e-20	37.389	Down
RPS6KA6	-1.94491	5.55544	-10.0454	3.39924e-21	4.63616e-20	37.3523	Down
NAP1L5	-1.01292	7.59989	-10.0447	3.42015e-21	4.66127e-20	37.3463	Down
GPM6A	-1.84184	4.9528	-10.0391	3.57681e-21	4.86409e-20	37.3021	Down
TRAF3IP3	-1.27652	8.16879	-10.034	3.7254e-21	5.05508e-20	37.262	Down
ABCG4	-1.11005	4.47531	-10.028	3.90771e-21	5.29089e-20	37.2149	Down
ENO4	-1.1504	3.88005	-10.0277	3.9171e-21	5.29975e-20	37.2125	Down
PDGFD	-1.1969	9.24939	-10.0272	3.9313e-21	5.3151e-20	37.2089	Down
PLCG2	-1.14602	10.3244	-10.026	3.96917e-21	5.36241e-20	37.1995	Down
CD22	-1.95087	7.90794	-10.0258	3.97555e-21	5.36714e-20	37.1979	Down
ACTN3	-1.28955	3.30877	-10.0245	4.01883e-21	5.42163e-20	37.1872	Down
HEATR9	-1.34062	3.47771	-10.0227	4.07744e-21	5.49671e-20	37.173	Down
SLFN5	-1.00024	11.9519	-10.0215	4.11595e-21	5.54462e-20	37.1637	Down
DTX3	-1.18797	9.50424	-10.0204	4.15039e-21	5.58697e-20	37.1555	Down
PTN	-1.30964	8.34006	-10.0199	4.17013e-21	5.60949e-20	37.1508	Down
SHISA3	-2.30815	6.31296	-10.018	4.23357e-21	5.69072e-20	37.1359	Down
ANTXR1	-1.28792	12.9255	-10.0159	4.30549e-21	5.78321e-20	37.1193	Down
P2RY8	-1.36519	8.71749	-10.0143	4.36104e-21	5.8536e-20	37.1066	Down
STAB1	-1.05232	11.6982	-10.0133	4.3939e-21	5.89346e-20	37.0992	Down
DTX1	-1.33391	8.80197	-10.0104	4.49658e-21	6.0225e-20	37.0765	Down
PDZRN3	-1.45229	10.0934	-10.0063	4.64508e-21	6.208e-20	37.0444	Down
PER1	-1.10025	11.5087	-10.0062	4.6507e-21	6.21106e-20	37.0432	Down
ENPP3	-1.5774	4.92988	-10.0024	4.79322e-21	6.3968e-20	37.0135	Down
ZNF528	-1.41263	8.22884	-9.99739	4.9895e-21	6.64445e-20	36.9739	Down
CD200R1	-1.16843	6.85341	-9.99282	5.17446e-21	6.88584e-20	36.938	Down
VEGFD	-1.63281	4.65918	-9.98964	5.30757e-21	7.05289e-20	36.913	Down
SRSF12	-1.38509	5.74768	-9.98913	5.32918e-21	7.07656e-20	36.909	Down
MYOT	-1.58906	4.77056	-9.98779	5.38659e-21	7.14261e-20	36.8984	Down
PI16	-2.40262	6.44443	-9.98481	5.51591e-21	7.30868e-20	36.875	Down
ZNF583	-1.13468	6.94867	-9.98473	5.51969e-21	7.30868e-20	36.8743	Down
LUM	-1.28476	14.3975	-9.98332	5.58175e-21	7.38561e-20	36.8633	Down
LPAR4	-1.17407	4.99543	-9.97859	5.79642e-21	7.65876e-20	36.8261	Down
CAPN3	-1.21711	5.267	-9.97448	5.98946e-21	7.9026e-20	36.7938	Down
DOK5	-1.26474	6.65551	-9.96886	6.26385e-21	8.25879e-20	36.7496	Down
RTN1	-1.45667	7.73598	-9.96721	6.34658e-21	8.36195e-20	36.7367	Down
HPGDS	-1.38609	5.99598	-9.96521	6.44824e-21	8.48988e-20	36.721	Down
PDGFRB	-1.10813	13.2399	-9.96447	6.48665e-21	8.53441e-20	36.7152	Down
PDE6B	-1.26588	6.2211	-9.96316	6.55474e-21	8.61183e-20	36.7049	Down
FREM1	-2.15441	7.09438	-9.95896	6.77735e-21	8.8851e-20	36.672	Down
EVI2A	-1.07577	8.55985	-9.95888	6.78183e-21	8.8851e-20	36.6713	Down
THEGL	-1.4771	2.29857	-9.95565	6.95836e-21	9.10357e-20	36.646	Down
DNAI3	-1.14109	4.28815	-9.95307	7.10263e-21	9.26628e-20	36.6257	Down
MED12L	-1.50657	6.06883	-9.95023	7.26495e-21	9.46477e-20	36.6035	Down
NTNG1	-1.85615	3.78487	-9.95005	7.2756e-21	9.47202e-20	36.602	Down
MYEF2	-1.92766	7.97339	-9.94892	7.34123e-21	9.55078e-20	36.5932	Down
TMEM119	-1.32556	10.1814	-9.94774	7.41067e-21	9.63438e-20	36.5839	Down
ARHGAP25	-1.04962	9.41178	-9.94684	7.46388e-21	9.69003e-20	36.5768	Down
IL34	-1.18475	7.91074	-9.94675	7.46923e-21	9.69022e-20	36.5761	Down
CHRNA6	-1.25742	3.4477	-9.94234	7.73565e-21	9.99944e-20	36.5416	Down
RBPMS2	-1.76497	8.70469	-9.94228	7.7398e-21	9.99944e-20	36.541	Down
TGFBR3	-1.31271	10.7404	-9.94129	7.8006e-21	1.0071e-19	36.5333	Down
TLR7	-1.49488	7.66259	-9.94078	7.83221e-21	1.01048e-19	36.5293	Down
P2RX2	-1.7768	3.15852	-9.93839	7.98287e-21	1.02778e-19	36.5106	Down
AGPAT4	-1.03205	8.70903	-9.93771	8.02611e-21	1.03263e-19	36.5052	Down
GFRA1	-2.27577	8.3369	-9.93422	8.25204e-21	1.06097e-19	36.4779	Down
ITPKB	-1.05615	11.3394	-9.93288	8.34014e-21	1.07156e-19	36.4674	Down
SCUBE2	-1.53174	7.61799	-9.93003	8.53139e-21	1.09537e-19	36.445	Down
IL5RA	-1.39015	4.03934	-9.92804	8.66749e-21	1.11208e-19	36.4294	Down
TCF23	-1.94367	3.83972	-9.92702	8.73794e-21	1.12035e-19	36.4215	Down
ITGBL1	-2.1038	8.31339	-9.92587	8.81827e-21	1.12909e-19	36.4124	Down
TRAM1L1	-1.37164	5.05236	-9.92514	8.86909e-21	1.13482e-19	36.4068	Down
LRRC3B	-1.34659	2.06727	-9.92036	9.21268e-21	1.17555e-19	36.3693	Down
TMEM221	-1.04959	4.12869	-9.91985	9.25042e-21	1.17956e-19	36.3653	Down
CXCL12	-1.36211	10.7827	-9.91927	9.29272e-21	1.18414e-19	36.3608	Down
CALHM5	-1.1817	8.70193	-9.91631	9.5142e-21	1.2107e-19	36.3375	Down
ABCB4	-1.17798	6.22092	-9.9143	9.66678e-21	1.22922e-19	36.3219	Down
SH3RF3	-1.0797	9.56622	-9.91292	9.77384e-21	1.24035e-19	36.311	Down
CPLANE1	-1.28451	9.78016	-9.91227	9.82406e-21	1.24588e-19	36.3059	Down
SYNE3	-1.04886	9.19924	-9.91089	9.93242e-21	1.2579e-19	36.2951	Down
LHX6	-1.15702	7.89494	-9.90611	1.03168e-20	1.30392e-19	36.2577	Down
ZNF331	-1.22347	9.49301	-9.90488	1.04181e-20	1.3146e-19	36.2481	Down
CACNA1H	-1.50619	10.9432	-9.90308	1.05677e-20	1.33112e-19	36.234	Down
FBXL22	-1.37186	7.3975	-9.90275	1.05954e-20	1.3337e-19	36.2314	Down
CDH26	-1.43151	5.1036	-9.89832	1.09747e-20	1.38051e-19	36.1968	Down
C3orf70	-1.61156	8.99951	-9.8943	1.13303e-20	1.42236e-19	36.1653	Down
CLDN11	-1.60146	7.22927	-9.89227	1.15138e-20	1.44443e-19	36.1495	Down
FBLN2	-1.56315	11.2542	-9.89146	1.15878e-20	1.45273e-19	36.1432	Down
ITGA4	-1.22509	9.90295	-9.88792	1.19179e-20	1.4911e-19	36.1155	Down
PKIA	-1.44038	7.45265	-9.88664	1.20393e-20	1.50527e-19	36.1055	Down
COL25A1	-1.5664	3.57541	-9.88652	1.20514e-20	1.50578e-19	36.1045	Down
PRDM8	-1.36069	7.77553	-9.88541	1.21576e-20	1.51803e-19	36.0958	Down
SLC8A3	-1.46477	4.01152	-9.884	1.22942e-20	1.53302e-19	36.0848	Down
NTN4	-1.05553	10.5565	-9.88343	1.23504e-20	1.5368e-19	36.0803	Down
ZNF415	-1.33864	7.29222	-9.88335	1.23575e-20	1.5368e-19	36.0798	Down
FAM229B	-1.1028	7.46285	-9.88318	1.23741e-20	1.53784e-19	36.0784	Down
BMX	-1.44666	5.81271	-9.88259	1.2432e-20	1.54401e-19	36.0738	Down
NEFH	-1.40084	5.62737	-9.88227	1.24645e-20	1.547e-19	36.0713	Down
IKZF1	-1.37771	10.0461	-9.8807	1.262e-20	1.56527e-19	36.059	Down
PCDHGA11	-1.01354	6.06758	-9.87832	1.28606e-20	1.59404e-19	36.0404	Down
FLNC	-2.22607	11.7766	-9.8775	1.29439e-20	1.60117e-19	36.0341	Down
SYNM	-2.31194	10.8423	-9.86895	1.3851e-20	1.7067e-19	35.9673	Down
CRLF2	-1.37507	4.61704	-9.86895	1.3852e-20	1.7067e-19	35.9672	Down
CDON	-1.37863	8.8426	-9.86786	1.39717e-20	1.71998e-19	35.9587	Down
SCARA5	-2.15868	7.05963	-9.86482	1.43116e-20	1.75983e-19	35.9351	Down
EFEMP2	-1.06684	10.8744	-9.86267	1.45582e-20	1.7878e-19	35.9182	Down
TMEM170B	-1.15915	8.33124	-9.85695	1.52317e-20	1.86804e-19	35.8736	Down
STON1-GTF2A1L	-1.51398	2.80243	-9.85437	1.55459e-20	1.90406e-19	35.8535	Down
IGSF11	-1.7726	4.71037	-9.85259	1.57666e-20	1.92983e-19	35.8396	Down
WFIKKN2	-1.5472	2.67105	-9.85232	1.58009e-20	1.93275e-19	35.8375	Down
PVRIG	-1.20564	4.45324	-9.85137	1.59196e-20	1.946e-19	35.8301	Down
PTPRQ	-1.66907	2.8669	-9.84713	1.64632e-20	2.00849e-19	35.797	Down
CNR2	-1.91261	5.24815	-9.8457	1.66508e-20	2.02871e-19	35.7858	Down
GDF6	-1.97221	4.30201	-9.84475	1.67755e-20	2.04258e-19	35.7785	Down
MLLT11	-1.04301	8.82571	-9.84338	1.69588e-20	2.06219e-19	35.7678	Down
CHRD	-1.27293	8.51508	-9.83828	1.76571e-20	2.1429e-19	35.728	Down
STAT4	-1.04399	7.82055	-9.83672	1.78752e-20	2.16797e-19	35.7159	Down
TIMP3	-1.46992	9.72016	-9.83243	1.84919e-20	2.23838e-19	35.6824	Down
SYT6	-1.40895	3.25421	-9.83025	1.88142e-20	2.27592e-19	35.6654	Down
FCRL1	-2.52325	5.05436	-9.82693	1.93137e-20	2.3318e-19	35.6396	Down
ST6GALNAC3	-1.08096	7.47363	-9.82026	2.03589e-20	2.45322e-19	35.5876	Down
MITF	-1.10336	9.6746	-9.8185	2.06441e-20	2.48437e-19	35.5739	Down
NOS1	-1.98988	4.68577	-9.8139	2.14066e-20	2.56949e-19	35.5382	Down
HERC5	-1.13514	9.02151	-9.79668	2.45233e-20	2.92472e-19	35.4042	Down
CYP11A1	-1.63286	4.25584	-9.79616	2.46237e-20	2.93482e-19	35.4002	Down
CCDC89	-1.10839	4.44899	-9.79286	2.52723e-20	3.0102e-19	35.3745	Down
GPR34	-1.1932	8.51334	-9.78838	2.6181e-20	3.11445e-19	35.3397	Down
C4A	-1.55094	9.42086	-9.78752	2.63596e-20	3.1337e-19	35.333	Down
PDZRN4	-2.25235	5.61451	-9.78465	2.69643e-20	3.20149e-19	35.3107	Down
TENM1	-1.95076	5.89212	-9.78249	2.74256e-20	3.25211e-19	35.2939	Down
SLC16A7	-1.41322	9.13979	-9.77818	2.83746e-20	3.35823e-19	35.2604	Down
TSPAN18	-1.26586	10.7691	-9.77415	2.9288e-20	3.46414e-19	35.2292	Down
CD226	-1.15913	7.63875	-9.77151	2.99039e-20	3.53473e-19	35.2087	Down
ASB16	-1.03073	6.0459	-9.77097	3.00327e-20	3.54771e-19	35.2044	Down
ZNF470	-1.40544	7.37155	-9.76612	3.12012e-20	3.68107e-19	35.1668	Down
FAXDC2	-1.2956	9.45474	-9.76356	3.18369e-20	3.75369e-19	35.1469	Down
FAM228A	-1.29213	2.90326	-9.75925	3.2935e-20	3.87367e-19	35.1135	Down
GSPT2	-1.33387	7.81526	-9.75741	3.34156e-20	3.92244e-19	35.0992	Down
ARMC12	-1.17464	3.04484	-9.75521	3.39989e-20	3.98337e-19	35.0822	Down
TRAPPC3L	-1.33924	2.84114	-9.75405	3.43091e-20	4.01718e-19	35.0732	Down
SDC2	-1.01226	11.3404	-9.75177	3.49311e-20	4.08231e-19	35.0555	Down
ZNF831	-1.6085	6.85488	-9.74495	3.68554e-20	4.29641e-19	35.0027	Down
CTNND2	-2.35258	5.65048	-9.74424	3.70621e-20	4.3178e-19	34.9972	Down
DENND2A	-1.01023	8.5081	-9.74348	3.72855e-20	4.34111e-19	34.9912	Down
SV2A	-1.24096	8.11837	-9.73865	3.87265e-20	4.50607e-19	34.9539	Down
NCAM2	-1.85545	6.05686	-9.73839	3.88079e-20	4.51272e-19	34.9518	Down
CNTLN	-1.08133	8.48143	-9.73605	3.9528e-20	4.59359e-19	34.9337	Down
IL10RA	-1.2326	10.3369	-9.73315	4.0439e-20	4.69652e-19	34.9112	Down
GRM6	-1.33067	3.59698	-9.72684	4.24929e-20	4.91972e-19	34.8624	Down
LTBP4	-1.00595	13.5294	-9.72631	4.26702e-20	4.93718e-19	34.8583	Down
CLEC17A	-1.97127	4.87291	-9.72413	4.34076e-20	5.01937e-19	34.8414	Down
CPAMD8	-1.24508	7.49419	-9.71958	4.49854e-20	5.19215e-19	34.8062	Down
C9orf131	-1.30548	3.30704	-9.71749	4.57305e-20	5.2716e-19	34.79	Down
TMEFF2	-1.77356	3.37285	-9.71456	4.67964e-20	5.38781e-19	34.7673	Down
MAP2	-1.36352	8.60195	-9.7118	4.78192e-20	5.50216e-19	34.746	Down
DACT1	-1.31158	9.6601	-9.71023	4.84134e-20	5.56022e-19	34.7338	Down
TRPM3	-1.5322	4.1277	-9.70881	4.89549e-20	5.61202e-19	34.7229	Down
PRDM5	-1.37714	7.25947	-9.70438	5.06857e-20	5.80687e-19	34.6886	Down
POU5F2	-1.16531	4.68068	-9.70078	5.21387e-20	5.96598e-19	34.6608	Down
SCN3B	-1.5495	6.10885	-9.69784	5.33554e-20	6.10145e-19	34.638	Down
DPEP2	-1.08776	7.22819	-9.69737	5.35503e-20	6.11624e-19	34.6345	Down
NEK10	-1.08538	5.47826	-9.6967	5.38339e-20	6.14485e-19	34.6293	Down
CLEC10A	-1.62975	7.14187	-9.69612	5.40792e-20	6.16907e-19	34.6248	Down
AEBP1	-1.3055	13.807	-9.69202	5.58467e-20	6.359e-19	34.5931	Down
C8orf48	-1.12084	4.06942	-9.6899	5.67816e-20	6.45756e-19	34.5767	Down
CR1	-1.74254	7.50082	-9.68882	5.72614e-20	6.50815e-19	34.5684	Down
CD28	-1.28769	7.68946	-9.68835	5.74736e-20	6.52829e-19	34.5648	Down
NRXN1	-2.08392	5.12504	-9.68642	5.83483e-20	6.6236e-19	34.5499	Down
POU2F2	-1.10468	10.2017	-9.68538	5.88263e-20	6.67379e-19	34.5419	Down
CYP27C1	-1.41597	4.85373	-9.68162	6.05862e-20	6.86926e-19	34.5128	Down
PROS1	-1.20454	10.3506	-9.68041	6.11635e-20	6.9305e-19	34.5035	Down
TSLP	-1.39874	5.02575	-9.67623	6.32007e-20	7.15263e-19	34.4712	Down
TTN	-1.08631	9.03813	-9.67557	6.35279e-20	7.18529e-19	34.4661	Down
PCDHGC4	-1.30303	4.48602	-9.67469	6.39654e-20	7.23039e-19	34.4593	Down
MLANA	-1.017	5.92078	-9.67279	6.49264e-20	7.33011e-19	34.4446	Down
PIP4P2	-1.00477	9.03584	-9.66884	6.69636e-20	7.55552e-19	34.4142	Down
ZNF625	-1.33905	2.91258	-9.66866	6.70584e-20	7.56164e-19	34.4128	Down
DCDC2C	-1.28852	1.48414	-9.66415	6.94688e-20	7.8287e-19	34.378	Down
TSPAN11	-1.30968	9.17642	-9.66154	7.09028e-20	7.98546e-19	34.3579	Down
PDE5A	-1.13591	10.9341	-9.65825	7.27523e-20	8.17893e-19	34.3325	Down
TMEM150C	-1.08274	8.46392	-9.65499	7.46304e-20	8.385e-19	34.3074	Down
GAP43	-1.79407	4.95802	-9.6497	7.77827e-20	8.71288e-19	34.2666	Down
TTYH2	-1.18636	8.68326	-9.64732	7.92388e-20	8.87064e-19	34.2483	Down
DST	-1.15452	13.0156	-9.64381	8.1444e-20	9.09563e-19	34.2213	Down
CDH6	-1.00172	9.19691	-9.64226	8.24374e-20	9.19555e-19	34.2093	Down
SLFN14	-1.26359	2.38404	-9.64175	8.27671e-20	9.2268e-19	34.2054	Down
IL33	-1.70603	9.63883	-9.63698	8.59081e-20	9.5655e-19	34.1687	Down
TGFB1I1	-1.10483	11.4604	-9.63672	8.60835e-20	9.5793e-19	34.1667	Down
HIF3A	-2.05295	8.3448	-9.63388	8.80151e-20	9.77924e-19	34.1448	Down
SPDYE21	-1.04727	4.69507	-9.63385	8.80379e-20	9.77924e-19	34.1446	Down
TLR1	-1.23013	8.46703	-9.63173	8.95068e-20	9.93648e-19	34.1282	Down
FBXO32	-1.27826	11.7046	-9.62981	9.08594e-20	1.00746e-18	34.1135	Down
ART1	-1.21906	1.91755	-9.62874	9.16243e-20	1.01534e-18	34.1052	Down
FBXL2	-1.06144	8.02974	-9.62663	9.31416e-20	1.03031e-18	34.089	Down
PHYHD1	-1.3408	7.76563	-9.621	9.73269e-20	1.07342e-18	34.0457	Down
LIFR	-1.53436	9.73759	-9.61615	1.01085e-19	1.11224e-18	34.0084	Down
RANBP3L	-1.48484	3.90775	-9.61016	1.05918e-19	1.16472e-18	33.9624	Down
WASF3	-1.59081	8.21676	-9.60838	1.07396e-19	1.17958e-18	33.9487	Down
FAM20A	-1.14549	8.75906	-9.60565	1.0971e-19	1.20429e-18	33.9277	Down
TMEM132C	-2.06648	4.08519	-9.6034	1.11653e-19	1.2249e-18	33.9104	Down
CNGA3	-1.72462	3.77408	-9.6023	1.12613e-19	1.2347e-18	33.902	Down
LIPI	-1.40827	2.08403	-9.60122	1.13564e-19	1.24366e-18	33.8937	Down
TCEAL3	-1.03243	9.24551	-9.60012	1.14543e-19	1.25218e-18	33.8852	Down
SERPINF1	-1.23832	11.8939	-9.59223	1.21809e-19	1.32926e-18	33.8246	Down
MYO15A	-1.03127	5.82829	-9.58825	1.25644e-19	1.3703e-18	33.7941	Down
INTS6L	-1.02384	8.92123	-9.58676	1.2711e-19	1.38548e-18	33.7827	Down
IRAG2	-1.42208	8.10929	-9.58664	1.27228e-19	1.38596e-18	33.7817	Down
ITK	-1.38394	8.44245	-9.58654	1.27329e-19	1.38625e-18	33.781	Down
KANK3	-1.01171	8.28279	-9.58563	1.28239e-19	1.39452e-18	33.7739	Down
ZSCAN1	-1.30973	2.47013	-9.58145	1.32479e-19	1.43895e-18	33.7419	Down
MAGEL2	-1.58654	4.78969	-9.57718	1.3696e-19	1.48676e-18	33.7091	Down
CCR4	-1.43053	7.23663	-9.5746	1.39738e-19	1.51427e-18	33.6893	Down
PCDHGA6	-1.09898	6.95321	-9.57356	1.40868e-19	1.52562e-18	33.6814	Down
LCNL1	-1.36974	3.01131	-9.5734	1.41047e-19	1.52667e-18	33.6801	Down
CACNA2D3	-1.33185	5.726	-9.57261	1.41916e-19	1.5343e-18	33.6741	Down
LRRN2	-1.52282	7.68549	-9.57045	1.44324e-19	1.55942e-18	33.6575	Down
EHD2	-1.08568	12.8555	-9.57006	1.44754e-19	1.56225e-18	33.6546	Down
MXRA8	-1.2593	12.2386	-9.56912	1.45818e-19	1.57282e-18	33.6474	Down
SOD3	-1.31901	11.8769	-9.56656	1.48755e-19	1.60172e-18	33.6277	Down
AGTR1	-2.31582	5.0795	-9.56542	1.50083e-19	1.61415e-18	33.619	Down
RTL8B	-1.03183	9.00488	-9.56474	1.5088e-19	1.62178e-18	33.6137	Down
SLC5A4	-1.254	4.75944	-9.56363	1.52185e-19	1.63487e-18	33.6053	Down
PCP4L1	-2.25218	4.82507	-9.55389	1.64155e-19	1.76041e-18	33.5307	Down
TAGLN	-1.64025	13.5209	-9.55215	1.66396e-19	1.78342e-18	33.5173	Down
CBFA2T3	-1.34904	8.20153	-9.54636	1.74047e-19	1.85793e-18	33.473	Down
SMARCA1	-1.19883	10.2626	-9.54342	1.78075e-19	1.89875e-18	33.4505	Down
ENPP2	-1.1667	10.5993	-9.543	1.78647e-19	1.90376e-18	33.4473	Down
BPI	-1.43703	4.27964	-9.54067	1.81914e-19	1.93747e-18	33.4295	Down
C22orf23	-1.08533	5.32172	-9.53487	1.90298e-19	2.02329e-18	33.3851	Down
STMN4	-1.37616	1.85103	-9.53272	1.93504e-19	2.0562e-18	33.3686	Down
ARHGAP22	-1.00451	7.30118	-9.53239	1.93992e-19	2.06021e-18	33.3661	Down
TIAM1	-1.15194	8.71311	-9.52875	1.99558e-19	2.11691e-18	33.3383	Down
MRGPRD	-1.22875	1.25987	-9.5282	2.00411e-19	2.12474e-18	33.3341	Down
PLD4	-1.68008	7.36266	-9.52757	2.01394e-19	2.13395e-18	33.3292	Down
ATP2B2	-1.5174	3.53603	-9.52685	2.02515e-19	2.14461e-18	33.3238	Down
STK32A	-1.7974	4.92789	-9.52476	2.05827e-19	2.1772e-18	33.3078	Down
PTPRC	-1.36629	11.5327	-9.52293	2.08777e-19	2.2059e-18	33.2938	Down
EVI2B	-1.21798	10.3133	-9.52172	2.10741e-19	2.22413e-18	33.2845	Down
LRRN3	-1.20622	5.36721	-9.51998	2.136e-19	2.25303e-18	33.2713	Down
SORCS3	-1.75321	2.62385	-9.51945	2.14483e-19	2.25978e-18	33.2672	Down
LRRC18	-1.39175	2.45087	-9.51648	2.19485e-19	2.30987e-18	33.2445	Down
SMO	-1.31122	9.32335	-9.51245	2.26458e-19	2.37921e-18	33.2137	Down
S100Z	-1.16735	3.04691	-9.50978	2.31186e-19	2.42752e-18	33.1933	Down
STEAP4	-1.53272	9.54222	-9.50855	2.33403e-19	2.44941e-18	33.1839	Down
SHISA9	-1.94122	3.64101	-9.50546	2.39058e-19	2.50593e-18	33.1603	Down
ZNF585B	-1.04305	9.39374	-9.50265	2.44325e-19	2.55971e-18	33.1389	Down
ACSM6	-1.35312	2.686	-9.499	2.51328e-19	2.63011e-18	33.111	Down
GPIHBP1	-1.40533	5.22888	-9.49885	2.51632e-19	2.63181e-18	33.1098	Down
ASPN	-1.58556	11.1594	-9.49577	2.57688e-19	2.68721e-18	33.0864	Down
AVPR1A	-1.27671	7.91579	-9.49572	2.57794e-19	2.68721e-18	33.086	Down
CDH19	-2.39707	5.2965	-9.49503	2.59186e-19	2.70021e-18	33.0807	Down
ODAD2	-1.6939	3.90318	-9.48665	2.76561e-19	2.87639e-18	33.0168	Down
TRPC4	-1.29238	6.26711	-9.48546	2.79103e-19	2.90121e-18	33.0078	Down
CACNA1C	-1.4839	9.9827	-9.48303	2.84405e-19	2.95467e-18	32.9892	Down
GDF10	-2.04411	4.10789	-9.47807	2.9553e-19	3.06511e-18	32.9514	Down
PTPRT	-1.89223	5.25439	-9.47404	3.04908e-19	3.15534e-18	32.9207	Down
LAT	-1.00434	4.82323	-9.4703	3.13845e-19	3.24422e-18	32.8922	Down
ADA2	-1.204	11.6192	-9.46832	3.18677e-19	3.29052e-18	32.8772	Down
MPP2	-1.35057	7.49176	-9.46474	3.27629e-19	3.37921e-18	32.8499	Down
DSCAML1	-1.87076	4.92611	-9.46402	3.29455e-19	3.39616e-18	32.8444	Down
PLCXD3	-2.13249	5.36942	-9.46347	3.30866e-19	3.40882e-18	32.8402	Down
SMIM17	-1.37817	2.39124	-9.46234	3.33761e-19	3.43484e-18	32.8316	Down
MMP16	-1.27078	7.61416	-9.46125	3.36584e-19	3.46007e-18	32.8233	Down
CRYAB	-1.47112	9.51459	-9.45822	3.44555e-19	3.53615e-18	32.8002	Down
GRIFIN	-1.29027	2.04871	-9.45738	3.46797e-19	3.55525e-18	32.7939	Down
NPR3	-1.73617	6.99035	-9.45253	3.60054e-19	3.68709e-18	32.7569	Down
LRRC17	-1.27315	6.99648	-9.44756	3.74128e-19	3.82572e-18	32.7191	Down
FXYD7	-1.14511	3.74291	-9.44753	3.74209e-19	3.82572e-18	32.7189	Down
TUSC3	-1.18273	9.10279	-9.44669	3.76669e-19	3.84876e-18	32.7125	Down
TASL	-1.06752	6.68877	-9.44608	3.78431e-19	3.86464e-18	32.7079	Down
TMEM132E	-1.39705	5.28444	-9.44552	3.80075e-19	3.8793e-18	32.7036	Down
NTNG2	-1.05757	7.22846	-9.44538	3.80496e-19	3.88148e-18	32.7025	Down
LEF1	-1.02074	9.92206	-9.43728	4.0505e-19	4.12665e-18	32.6409	Down
SLC5A10	-1.1415	4.1363	-9.43723	4.05195e-19	4.12665e-18	32.6406	Down
WTIP	-1.07735	8.94168	-9.43638	4.07867e-19	4.15159e-18	32.6341	Down
INA	-1.63048	4.55855	-9.43597	4.09162e-19	4.1625e-18	32.631	Down
ST8SIA6	-1.52561	4.30293	-9.42956	4.29877e-19	4.36846e-18	32.5823	Down
SLC13A4	-1.12238	6.37504	-9.42679	4.39167e-19	4.45314e-18	32.5613	Down
IFIT2	-1.17063	9.54994	-9.42459	4.46677e-19	4.52683e-18	32.5446	Down
PRAM1	-1.03034	7.05549	-9.42353	4.50344e-19	4.56151e-18	32.5365	Down
KIF3C	-1.01604	9.21934	-9.42311	4.5183e-19	4.57189e-18	32.5333	Down
SEMA3A	-1.38353	9.27596	-9.4231	4.5186e-19	4.57189e-18	32.5332	Down
RASGRP1	-1.1471	8.9936	-9.42051	4.6095e-19	4.66133e-18	32.5136	Down
MLNR	-1.85491	2.76368	-9.41763	4.71295e-19	4.76335e-18	32.4917	Down
TRIL	-1.15346	8.78449	-9.41374	4.8566e-19	4.89791e-18	32.4621	Down
CHODL	-1.61805	4.08958	-9.41288	4.88868e-19	4.92492e-18	32.4557	Down
ST6GAL2	-1.84323	5.70345	-9.41136	4.94647e-19	4.97506e-18	32.4441	Down
CR2	-2.76939	7.86257	-9.41046	4.98077e-19	5.00416e-18	32.4373	Down
PTGER1	-1.64182	6.59109	-9.41003	4.9974e-19	5.01815e-18	32.434	Down
TWIST2	-1.40244	7.22938	-9.40752	5.09473e-19	5.11313e-18	32.415	Down
C2orf74	-1.21633	5.55776	-9.40598	5.15569e-19	5.16874e-18	32.4033	Down
BCHE	-1.95024	5.68814	-9.40585	5.16069e-19	5.17097e-18	32.4023	Down
HSPB2	-1.15369	4.47021	-9.40483	5.20171e-19	5.20646e-18	32.3945	Down
CPZ	-1.37789	5.5088	-9.40143	5.33951e-19	5.33865e-18	32.3688	Down
TAGAP	-1.23484	9.00742	-9.39805	5.48009e-19	5.47333e-18	32.3432	Down
PRND	-1.69424	5.6908	-9.39665	5.53957e-19	5.5268e-18	32.3325	Down
ARHGAP24	-1.00687	9.48193	-9.39567	5.58164e-19	5.5658e-18	32.3251	Down
FYB1	-1.09559	11.0146	-9.39538	5.59411e-19	5.57525e-18	32.3229	Down
HSF5	-1.31231	3.11465	-9.39318	5.6894e-19	5.66112e-18	32.3063	Down
HCRTR1	-1.12491	2.92552	-9.39264	5.71309e-19	5.68165e-18	32.3022	Down
SRPX2	-1.08846	9.07168	-9.38858	5.89449e-19	5.8558e-18	32.2714	Down
SYNGR1	-1.50604	8.70119	-9.38712	5.96126e-19	5.91897e-18	32.2603	Down
TLR10	-1.76232	6.50264	-9.37871	6.3596e-19	6.30105e-18	32.1966	Down
HRH2	-1.1282	6.59859	-9.3766	6.46323e-19	6.38673e-18	32.1807	Down
CD84	-1.23503	10.0442	-9.37551	6.51764e-19	6.43708e-18	32.1724	Down
ATP1A4	-1.38128	3.11028	-9.37164	6.71433e-19	6.62431e-18	32.1431	Down
ACKR1	-2.00248	8.91578	-9.37017	6.79072e-19	6.69258e-18	32.132	Down
SCN1B	-1.03424	7.92729	-9.36994	6.80271e-19	6.70085e-18	32.1302	Down
PRUNE2	-2.08202	10.6048	-9.36597	7.01329e-19	6.90363e-18	32.1002	Down
PHF21B	-1.59947	3.13122	-9.36159	7.25367e-19	7.1262e-18	32.067	Down
TPST1	-1.00752	9.36947	-9.36057	7.31026e-19	7.17801e-18	32.0594	Down
GRAP2	-1.15944	7.68938	-9.35569	7.58991e-19	7.433e-18	32.0224	Down
UNC45B	-1.51323	3.63913	-9.35308	7.74338e-19	7.57931e-18	32.0027	Down
ZNF385B	-1.65049	6.04538	-9.35289	7.75426e-19	7.58597e-18	32.0013	Down
GPR52	-1.10955	1.93722	-9.35258	7.77281e-19	7.60013e-18	31.9989	Down
RND2	-1.52909	5.81297	-9.35031	7.90942e-19	7.72964e-18	31.9818	Down
STAB2	-1.21071	5.06918	-9.34571	8.194e-19	7.99516e-18	31.947	Down
ADAMTSL4	-1.1765	9.93862	-9.34531	8.21887e-19	8.01523e-18	31.944	Down
EDNRB	-1.11948	9.7627	-9.34175	8.4467e-19	8.22879e-18	31.9171	Down
GPR161	-1.06807	9.60837	-9.33995	8.56409e-19	8.33443e-18	31.9035	Down
LY9	-1.47901	7.37752	-9.33836	8.66885e-19	8.43197e-18	31.8915	Down
ADRB2	-1.32155	6.34234	-9.33702	8.75846e-19	8.51469e-18	31.8814	Down
ISL2	-1.19562	6.61691	-9.33671	8.77904e-19	8.53024e-18	31.8791	Down
GBGT1	-1.05348	8.30971	-9.33513	8.88621e-19	8.62537e-18	31.8671	Down
LRRC4B	-1.18137	7.31134	-9.33163	9.12813e-19	8.83256e-18	31.8407	Down
ZNF71	-1.12484	8.21572	-9.32881	9.32721e-19	9.01114e-18	31.8194	Down
EPM2AIP1	-1.00438	10.7347	-9.32663	9.48417e-19	9.15328e-18	31.803	Down
GLI2	-1.2897	9.30164	-9.32186	9.83765e-19	9.46988e-18	31.7669	Down
LIX1	-1.78674	3.27633	-9.32179	9.84278e-19	9.46992e-18	31.7664	Down
CD109	-1.30146	9.95409	-9.31445	1.0412e-18	1.00072e-17	31.7111	Down
PCDHB7	-1.1957	6.47101	-9.31323	1.05098e-18	1.0096e-17	31.7019	Down
KLHL41	-1.25698	4.28704	-9.30495	1.11972e-18	1.07232e-17	31.6395	Down
SCRN1	-1.20827	11.9191	-9.30191	1.14604e-18	1.09696e-17	31.6166	Down
DPT	-1.77509	7.80492	-9.30135	1.15103e-18	1.1006e-17	31.6123	Down
ATP8A2	-1.14207	5.93505	-9.30104	1.15368e-18	1.10257e-17	31.61	Down
PMP2	-1.7352	2.78719	-9.29934	1.16881e-18	1.11645e-17	31.5972	Down
ALK	-1.42938	3.52903	-9.29808	1.18012e-18	1.12668e-17	31.5877	Down
PTPRZ1	-2.17809	7.23498	-9.29779	1.18278e-18	1.12864e-17	31.5855	Down
MARK1	-1.49534	8.11182	-9.29328	1.22431e-18	1.16647e-17	31.5515	Down
THSD4	-1.27986	10.0604	-9.29317	1.22526e-18	1.16679e-17	31.5508	Down
ZNF879	-1.18502	6.55675	-9.29177	1.23843e-18	1.17873e-17	31.5402	Down
ATP6V1G2	-1.09201	4.73716	-9.29116	1.24429e-18	1.18369e-17	31.5356	Down
MEOX1	-1.41983	7.21227	-9.28968	1.25838e-18	1.19649e-17	31.5245	Down
PLAC9	-1.09277	7.57905	-9.28681	1.28635e-18	1.22122e-17	31.5028	Down
TGFB2	-1.16372	8.59725	-9.28481	1.3061e-18	1.23933e-17	31.4878	Down
SCUBE1	-1.46766	8.10894	-9.28384	1.31584e-18	1.2473e-17	31.4805	Down
DYNC1I1	-1.49356	6.85378	-9.28281	1.32629e-18	1.25657e-17	31.4727	Down
ZIM2	-1.37528	1.7566	-9.28162	1.33833e-18	1.26666e-17	31.4638	Down
BMERB1	-1.09144	9.44655	-9.28156	1.33899e-18	1.26666e-17	31.4634	Down
ANXA6	-1.00215	12.3145	-9.27846	1.37107e-18	1.29636e-17	31.44	Down
EML5	-1.40355	4.96538	-9.27771	1.37893e-18	1.30312e-17	31.4344	Down
LAX1	-1.4174	7.60019	-9.27695	1.38694e-18	1.31003e-17	31.4287	Down
LPAR1	-1.16982	9.48806	-9.26837	1.48087e-18	1.39521e-17	31.3642	Down
DRD5	-1.26793	1.7815	-9.26466	1.52343e-18	1.43241e-17	31.3363	Down
ELOVL5	-1.06898	11.2701	-9.25611	1.62614e-18	1.52821e-17	31.272	Down
ACSM5	-1.40042	4.44917	-9.25586	1.62916e-18	1.53027e-17	31.2702	Down
VIP	-2.38909	4.88271	-9.25329	1.66147e-18	1.55906e-17	31.2509	Down
MEIS3	-1.01457	8.60538	-9.25127	1.68721e-18	1.58241e-17	31.2357	Down
ZNF345	-1.17096	7.04904	-9.25111	1.68933e-18	1.5836e-17	31.2345	Down
VASH2	-1.02191	7.61455	-9.25072	1.69439e-18	1.58754e-17	31.2316	Down
CPNE8	-1.01078	8.6719	-9.24867	1.72107e-18	1.6093e-17	31.2162	Down
SYNDIG1L	-1.18961	2.34187	-9.24514	1.76798e-18	1.64985e-17	31.1897	Down
SEMA6D	-1.31989	8.44499	-9.23732	1.87654e-18	1.74852e-17	31.131	Down
IGFBP4	-1.12816	14.3848	-9.23594	1.89634e-18	1.76609e-17	31.1207	Down
RAB3C	-1.88495	6.74188	-9.23407	1.92355e-18	1.78932e-17	31.1067	Down
CD160	-1.12129	5.7255	-9.23218	1.95144e-18	1.81378e-17	31.0925	Down
ADGRB1	-1.36364	6.0504	-9.22879	2.0024e-18	1.86021e-17	31.0671	Down
CTSG	-2.06776	4.43914	-9.22706	2.02893e-18	1.88392e-17	31.0541	Down
ANKRD65	-1.35812	7.53145	-9.21898	2.15772e-18	1.99753e-17	30.9936	Down
MRC2	-1.07505	12.1081	-9.21796	2.1745e-18	2.01206e-17	30.9859	Down
MYL9	-1.52517	13.81	-9.21664	2.19647e-18	2.03037e-17	30.976	Down
ZNF732	-1.29453	3.32051	-9.21501	2.22394e-18	2.05384e-17	30.9638	Down
GDF5	-1.3394	2.76919	-9.21453	2.23199e-18	2.06013e-17	30.9602	Down
SCARF2	-1.19514	10.3876	-9.20904	2.32709e-18	2.14578e-17	30.9192	Down
ZNF347	-1.26524	8.54735	-9.20711	2.36162e-18	2.17547e-17	30.9047	Down
FAM162B	-1.00804	5.95547	-9.19383	2.61239e-18	2.40053e-17	30.8053	Down
ATCAY	-1.46503	3.4899	-9.19214	2.64615e-18	2.43036e-17	30.7927	Down
ZNF257	-1.50777	5.47104	-9.18991	2.69132e-18	2.4682e-17	30.776	Down
FCRL2	-1.88182	5.67916	-9.18909	2.708e-18	2.48105e-17	30.7699	Down
ANGPTL5	-1.35097	2.11354	-9.18813	2.7279e-18	2.49805e-17	30.7627	Down
JAML	-1.08698	8.94735	-9.18753	2.74044e-18	2.50829e-17	30.7582	Down
SHISAL1	-1.71771	7.66461	-9.18454	2.80332e-18	2.56459e-17	30.7359	Down
LOXHD1	-1.26662	4.23102	-9.18282	2.83999e-18	2.59559e-17	30.7231	Down
SLAMF1	-1.17234	7.4081	-9.18261	2.84458e-18	2.5985e-17	30.7215	Down
CCNA1	-1.3277	2.71237	-9.18243	2.84857e-18	2.5996e-17	30.7201	Down
L1TD1	-1.55883	4.1047	-9.18231	2.85106e-18	2.6006e-17	30.7192	Down
CX3CR1	-1.34589	6.69226	-9.18132	2.8727e-18	2.61905e-17	30.7118	Down
ANGPTL2	-1.16104	11.9298	-9.17941	2.91445e-18	2.65452e-17	30.6976	Down
NUDT11	-1.38099	5.2213	-9.17829	2.9394e-18	2.67593e-17	30.6892	Down
VCAN	-1.21507	13.2769	-9.17594	2.99231e-18	2.72277e-17	30.6716	Down
FNDC1	-1.94476	11.0741	-9.17221	3.07829e-18	2.7969e-17	30.6437	Down
GPBAR1	-1.31913	7.78298	-9.16943	3.14385e-18	2.8523e-17	30.623	Down
CDKL2	-1.47902	5.37353	-9.16891	3.15611e-18	2.86202e-17	30.6192	Down
CCDC188	-1.11339	4.05606	-9.16835	3.16951e-18	2.87278e-17	30.615	Down
CCN2	-1.07735	13.4223	-9.1681	3.17572e-18	2.877e-17	30.6131	Down
OSBPL6	-1.21305	7.15331	-9.1649	3.25356e-18	2.94609e-17	30.5892	Down
KCNA3	-1.57897	6.73945	-9.16393	3.27755e-18	2.96492e-17	30.582	Down
FIBIN	-1.26623	8.3855	-9.16372	3.28292e-18	2.96834e-17	30.5804	Down
SLC16A4	-1.13184	8.60072	-9.16123	3.3455e-18	3.02052e-17	30.5618	Down
PM20D1	-1.08057	4.69605	-9.16091	3.35347e-18	3.02478e-17	30.5594	Down
DCT	-1.371	2.7998	-9.15907	3.40074e-18	3.06446e-17	30.5457	Down
CPA3	-1.65059	9.11158	-9.1584	3.418e-18	3.07852e-17	30.5407	Down
CHST10	-1.10238	7.93785	-9.15735	3.44512e-18	3.10145e-17	30.5329	Down
PLA2G5	-1.39994	5.56053	-9.15724	3.44808e-18	3.1026e-17	30.5321	Down
MANSC4	-1.17824	2.26096	-9.15233	3.57873e-18	3.2155e-17	30.4954	Down
RIMS1	-2.13966	5.10816	-9.14746	3.71327e-18	3.33144e-17	30.4591	Down
GNB3	-1.02956	5.74385	-9.1474	3.71492e-18	3.33144e-17	30.4587	Down
CCN5	-1.68034	5.49673	-9.14244	3.85709e-18	3.45727e-17	30.4217	Down
HDAC9	-1.29508	9.57103	-9.13783	3.99416e-18	3.57669e-17	30.3873	Down
CYS1	-1.68464	7.62603	-9.13626	4.04186e-18	3.61766e-17	30.3756	Down
C3	-1.59921	14.6833	-9.13366	4.12224e-18	3.68429e-17	30.3563	Down
CNN1	-2.21088	11.474	-9.13081	4.21202e-18	3.76273e-17	30.335	Down
CSF2RB	-1.21024	10.2437	-9.12869	4.28002e-18	3.8198e-17	30.3193	Down
DOCK3	-1.38706	6.88309	-9.12807	4.3003e-18	3.83606e-17	30.3146	Down
VN1R1	-1.31383	5.3878	-9.12209	4.49898e-18	4.00562e-17	30.2702	Down
SLC2A4	-1.59991	7.47326	-9.12168	4.51296e-18	4.01615e-17	30.2671	Down
NPTXR	-1.63802	8.81965	-9.11544	4.73086e-18	4.20403e-17	30.2207	Down
LRRC55	-1.34515	5.12495	-9.11297	4.81997e-18	4.27913e-17	30.2023	Down
SLA	-1.13896	9.85661	-9.11281	4.82572e-18	4.28219e-17	30.2012	Down
LRP1B	-1.60341	3.78445	-9.1103	4.91823e-18	4.36013e-17	30.1825	Down
FAM180B	-1.37163	2.06591	-9.10793	5.00693e-18	4.43454e-17	30.1649	Down
WSCD2	-2.2186	5.87391	-9.10786	5.0099e-18	4.43506e-17	30.1643	Down
RGS18	-1.12078	6.80703	-9.10368	5.17027e-18	4.56481e-17	30.1333	Down
RASD2	-1.10384	8.50604	-9.10314	5.19147e-18	4.58055e-17	30.1292	Down
CPT1C	-1.14699	7.7722	-9.09919	5.34848e-18	4.71238e-17	30.0999	Down
IDO2	-1.31631	3.54032	-9.09273	5.61575e-18	4.93852e-17	30.0519	Down
HSPA12A	-1.17094	8.31909	-9.08987	5.73846e-18	5.04167e-17	30.0306	Down
PCDHGC5	-1.29119	4.47475	-9.0888	5.7848e-18	5.07999e-17	30.0227	Down
UTS2B	-1.18388	3.71104	-9.08713	5.85809e-18	5.13949e-17	30.0103	Down
GPR141	-1.33949	5.14345	-9.08442	5.97918e-18	5.24326e-17	29.9902	Down
MCF2	-1.13029	2.86081	-9.08139	6.11718e-18	5.36175e-17	29.9677	Down
SPIRE1	-1.12878	9.63669	-9.07935	6.21214e-18	5.44242e-17	29.9526	Down
TMC3	-1.28819	3.56112	-9.07882	6.23711e-18	5.46172e-17	29.9486	Down
MID2	-1.16704	8.45846	-9.07402	6.46671e-18	5.65745e-17	29.913	Down
EPHA6	-1.81507	3.17807	-9.07243	6.54433e-18	5.71731e-17	29.9013	Down
NTN3	-1.41609	3.45839	-9.06693	6.82156e-18	5.95391e-17	29.8605	Down
PRIMA1	-2.27274	6.99704	-9.06606	6.86619e-18	5.99006e-17	29.8541	Down
DPYS	-1.4592	2.55268	-9.06237	7.05983e-18	6.1446e-17	29.8267	Down
PPP1R3C	-1.57739	7.70525	-9.05842	7.27264e-18	6.32685e-17	29.7974	Down
SLC30A8	-1.80014	3.1488	-9.05668	7.3687e-18	6.40743e-17	29.7845	Down
TAS1R1	-1.28781	3.05596	-9.0548	7.47335e-18	6.49236e-17	29.7707	Down
CRHR2	-1.27363	3.98095	-9.04963	7.76979e-18	6.74046e-17	29.7324	Down
PTCH1	-1.09011	11.0019	-9.04791	7.87131e-18	6.819e-17	29.7196	Down
PCDHGA5	-1.17748	5.90313	-9.04754	7.89299e-18	6.83142e-17	29.7169	Down
EPHA4	-1.3222	8.67143	-9.04673	7.94113e-18	6.86989e-17	29.7109	Down
ZNF665	-1.19124	6.46729	-9.04462	8.06867e-18	6.97374e-17	29.6952	Down
NNAT	-1.22507	6.87656	-9.0421	8.22299e-18	7.10053e-17	29.6766	Down
ADORA2A	-1.02985	4.64844	-9.0419	8.2354e-18	7.1023e-17	29.6751	Down
HLF	-1.51247	7.68931	-9.04188	8.23649e-18	7.1023e-17	29.675	Down
GPR63	-1.0614	7.34205	-9.04061	8.31533e-18	7.16697e-17	29.6656	Down
UNC13C	-1.69762	3.01319	-9.03857	8.44378e-18	7.27431e-17	29.6505	Down
ALPK3	-1.31102	9.71625	-9.03663	8.56817e-18	7.37806e-17	29.6361	Down
ZNF99	-1.41095	3.13313	-9.0346	8.69963e-18	7.48088e-17	29.6211	Down
AP3B2	-1.89494	5.37228	-9.03312	8.79709e-18	7.55183e-17	29.6102	Down
GPR82	-1.01986	6.46866	-9.02961	9.03212e-18	7.74176e-17	29.5842	Down
RHBDL3	-1.30161	4.75243	-9.0243	9.39974e-18	8.04205e-17	29.5449	Down
NLGN4X	-1.58561	6.99429	-9.024	9.421e-18	8.05284e-17	29.5427	Down
CRYBG3	-1.04699	10.2919	-9.02384	9.43222e-18	8.05873e-17	29.5415	Down
KLHL29	-1.07046	9.21772	-9.02122	9.6191e-18	8.20333e-17	29.5222	Down
GLIS2	-1.00921	10.55	-9.0205	9.67176e-18	8.2407e-17	29.5169	Down
HPCAL4	-1.50077	3.78518	-9.02036	9.68144e-18	8.24517e-17	29.5159	Down
COL6A3	-1.16457	15.1474	-9.02016	9.69587e-18	8.25368e-17	29.5144	Down
RASGEF1C	-1.53887	3.72854	-9.01823	9.83779e-18	8.37067e-17	29.5001	Down
CCDC141	-1.35449	5.4663	-9.01688	9.93776e-18	8.44415e-17	29.4902	Down
ANKRD29	-1.37628	8.31824	-9.01547	1.00437e-17	8.52246e-17	29.4797	Down
RYR2	-1.66233	7.97288	-9.01508	1.0073e-17	8.54344e-17	29.4769	Down
SEMA5B	-1.07619	7.34342	-9.01385	1.01664e-17	8.61873e-17	29.4678	Down
MYOM1	-1.442	7.99039	-9.01168	1.03331e-17	8.75208e-17	29.4518	Down
HOPX	-1.375	10.0497	-9.0106	1.04171e-17	8.81925e-17	29.4438	Down
SEZ6	-1.52125	4.99908	-9.00786	1.0634e-17	8.99065e-17	29.4235	Down
FCGR2B	-1.17308	7.98163	-9.00579	1.07999e-17	9.12259e-17	29.4083	Down
RAB44	-1.21457	4.08872	-9.00545	1.08279e-17	9.14212e-17	29.4057	Down
IGFBP6	-1.07552	9.53978	-9.00431	1.09209e-17	9.21646e-17	29.3973	Down
C1QTNF4	-1.33033	4.50588	-9.00314	1.1017e-17	9.28069e-17	29.3887	Down
ELAVL3	-1.40292	3.30966	-8.99867	1.13921e-17	9.59231e-17	29.3558	Down
MGAT4C	-1.73663	3.35055	-8.99554	1.16631e-17	9.81164e-17	29.3326	Down
PCDHGA4	-1.2978	5.61657	-8.99384	1.18128e-17	9.93306e-17	29.3201	Down
GPR173	-1.14052	6.60136	-8.99164	1.20082e-17	1.00929e-16	29.3039	Down
ABCB5	-1.67957	3.43282	-8.98855	1.229e-17	1.03157e-16	29.2811	Down
ARL4D	-1.37907	6.90746	-8.98679	1.24532e-17	1.04386e-16	29.2681	Down
CLNK	-1.24818	5.58082	-8.98581	1.25445e-17	1.05049e-16	29.2609	Down
ZNF772	-1.28857	7.88991	-8.98576	1.25492e-17	1.05049e-16	29.2606	Down
SMIM43	-1.31647	3.429	-8.98561	1.25638e-17	1.05107e-16	29.2594	Down
OTOGL	-1.44334	4.50209	-8.98357	1.27572e-17	1.0655e-16	29.2444	Down
EDA2R	-1.25258	6.03676	-8.98	1.3103e-17	1.09291e-16	29.2181	Down
FAM205C	-1.19822	1.66489	-8.97824	1.32763e-17	1.10687e-16	29.2051	Down
GP5	-1.20375	3.89487	-8.97785	1.33153e-17	1.10963e-16	29.2023	Down
IL17RD	-1.27197	8.84308	-8.97757	1.33426e-17	1.1114e-16	29.2002	Down
MAGEE2	-1.1702	1.39536	-8.9743	1.36741e-17	1.138e-16	29.1761	Down
SLC7A14	-1.77327	3.14157	-8.97098	1.40171e-17	1.16499e-16	29.1517	Down
PKD2L2	-1.04315	4.2115	-8.97086	1.40304e-17	1.16557e-16	29.1508	Down
HHIPL1	-1.06803	8.04058	-8.96549	1.46051e-17	1.21115e-16	29.1113	Down
ART4	-1.49293	4.32526	-8.96415	1.47528e-17	1.22231e-16	29.1014	Down
FAM181B	-1.63141	3.72751	-8.96279	1.49031e-17	1.23316e-16	29.0914	Down
SNCA	-1.24535	6.62855	-8.96248	1.4938e-17	1.23546e-16	29.0891	Down
SLC16A12	-1.33518	4.03241	-8.96201	1.49897e-17	1.23918e-16	29.0857	Down
ZNF736	-1.39925	8.47609	-8.96138	1.50613e-17	1.24455e-16	29.081	Down
METTL7A	-1.02861	11.5678	-8.95988	1.52303e-17	1.25795e-16	29.07	Down
PTGDS	-1.6013	10.4668	-8.95846	1.53936e-17	1.27088e-16	29.0595	Down
DTHD1	-1.54713	5.09399	-8.95402	1.59129e-17	1.312e-16	29.0269	Down
LRRTM1	-1.91983	3.21324	-8.95239	1.61083e-17	1.32753e-16	29.0149	Down
CHST15	-1.08875	10.9375	-8.94925	1.64898e-17	1.35596e-16	28.9918	Down
NEFL	-1.96341	3.78247	-8.94766	1.66874e-17	1.37161e-16	28.9801	Down
ISLR	-1.46312	11.7512	-8.94129	1.75003e-17	1.43462e-16	28.9333	Down
MS4A6A	-1.08997	10.582	-8.94091	1.75502e-17	1.43808e-16	28.9305	Down
FAM110D	-1.0266	6.55299	-8.93843	1.78779e-17	1.46171e-16	28.9123	Down
MS4A1	-2.50205	7.70956	-8.93737	1.80196e-17	1.47266e-16	28.9045	Down
NME5	-1.30672	4.97359	-8.93692	1.80807e-17	1.477e-16	28.9012	Down
RGS13	-1.57527	5.26607	-8.93593	1.82142e-17	1.48642e-16	28.894	Down
STAP1	-1.55338	5.46446	-8.93589	1.82199e-17	1.48642e-16	28.8937	Down
ZFP37	-1.08416	6.82858	-8.93457	1.84006e-17	1.49918e-16	28.884	Down
RNF112	-1.07317	4.63411	-8.93278	1.86478e-17	1.518e-16	28.8708	Down
RASAL3	-1.04606	9.46551	-8.92725	1.94324e-17	1.58087e-16	28.8303	Down
LILRA4	-1.607	4.20032	-8.92722	1.94372e-17	1.58087e-16	28.83	Down
HAND2	-2.55507	7.21075	-8.92444	1.98442e-17	1.61187e-16	28.8096	Down
ATP10A	-1.05928	9.2009	-8.92232	2.01602e-17	1.63639e-16	28.7941	Down
ACR	-1.1489	3.18212	-8.92138	2.03029e-17	1.64625e-16	28.7872	Down
CTNNA3	-2.14884	5.37664	-8.91934	2.06141e-17	1.67003e-16	28.7722	Down
MPEG1	-1.22585	11.1159	-8.91907	2.06557e-17	1.67267e-16	28.7702	Down
KCNS3	-1.18505	8.9324	-8.91608	2.11215e-17	1.70742e-16	28.7483	Down
F13A1	-1.73781	9.26619	-8.91541	2.12266e-17	1.71517e-16	28.7434	Down
HOXA2	-1.25399	6.644	-8.91297	2.16157e-17	1.74358e-16	28.7255	Down
ITGAL	-1.21393	10.3769	-8.91175	2.18127e-17	1.75643e-16	28.7166	Down
IQCA1	-1.11271	5.69076	-8.91029	2.20519e-17	1.77416e-16	28.7059	Down
FAXC	-1.85228	6.68752	-8.90881	2.22966e-17	1.79307e-16	28.695	Down
LRRC7	-1.11882	5.49335	-8.90661	2.26656e-17	1.82038e-16	28.6789	Down
CMKLR1	-1.08622	9.4389	-8.90588	2.27889e-17	1.8295e-16	28.6735	Down
MS4A7	-1.11754	10.105	-8.90097	2.36375e-17	1.89517e-16	28.6375	Down
MYRIP	-1.62033	7.00005	-8.8995	2.38977e-17	1.91356e-16	28.6268	Down
A4GALT	-1.00427	9.61482	-8.89835	2.41032e-17	1.92919e-16	28.6183	Down
CSF2RA	-1.04679	8.72373	-8.8982	2.4129e-17	1.93042e-16	28.6173	Down
BTLA	-1.43917	5.68957	-8.89695	2.43558e-17	1.94606e-16	28.6081	Down
C1QTNF3	-1.2757	7.93176	-8.89416	2.48651e-17	1.98334e-16	28.5877	Down
KCNA2	-1.63053	4.00598	-8.89249	2.51772e-17	2.00566e-16	28.5755	Down
P2RX1	-1.28985	7.353	-8.89183	2.53013e-17	2.01469e-16	28.5706	Down
CCL19	-2.16342	7.70651	-8.89122	2.5415e-17	2.02115e-16	28.5662	Down
ALDH1L2	-1.09305	9.55631	-8.8898	2.56864e-17	2.04186e-16	28.5558	Down
PCDHGA7	-1.1722	5.35902	-8.88528	2.65648e-17	2.10808e-16	28.5227	Down
ARHGAP6	-1.23629	8.9294	-8.8839	2.6838e-17	2.12799e-16	28.5126	Down
SLC5A7	-1.78527	2.78081	-8.88055	2.75149e-17	2.17884e-16	28.4881	Down
ARHGEF10	-1.02632	10.3881	-8.87947	2.77359e-17	2.19541e-16	28.4802	Down
KMO	-1.00132	6.59181	-8.8786	2.79159e-17	2.20871e-16	28.4739	Down
CTTNBP2	-1.41475	7.51701	-8.87792	2.80578e-17	2.21806e-16	28.4689	Down
PCBP3	-1.348	7.11561	-8.87767	2.8111e-17	2.22132e-16	28.467	Down
C16orf89	-1.87587	6.54579	-8.87221	2.92742e-17	2.30736e-16	28.4271	Down
CTSK	-1.02043	11.7967	-8.87164	2.93991e-17	2.31524e-16	28.4229	Down
SLC12A3	-1.32816	3.83255	-8.87017	2.97204e-17	2.33956e-16	28.4122	Down
APOD	-2.11727	10.9688	-8.86561	3.07453e-17	2.41818e-16	28.3789	Down
SACS	-1.09008	10.408	-8.86489	3.09108e-17	2.4271e-16	28.3736	Down
DRP2	-1.29778	5.5012	-8.86372	3.11805e-17	2.44725e-16	28.3651	Down
SAMD3	-1.24834	6.17422	-8.86342	3.12483e-17	2.45154e-16	28.3629	Down
SEPTIN5	-1.07515	8.63127	-8.86293	3.13639e-17	2.45752e-16	28.3593	Down
GFPT2	-1.29976	8.84962	-8.85751	3.26504e-17	2.55186e-16	28.3198	Down
ARHGAP9	-1.03637	9.27289	-8.85719	3.27281e-17	2.55685e-16	28.3174	Down
GPR18	-1.0533	6.00035	-8.85706	3.27592e-17	2.55821e-16	28.3165	Down
MGARP	-1.17067	3.08318	-8.85328	3.36908e-17	2.62766e-16	28.2889	Down
NIPAL4	-1.73968	5.46531	-8.8514	3.4166e-17	2.66249e-16	28.2751	Down
HSPG2	-1.06375	15.2145	-8.85063	3.436e-17	2.67536e-16	28.2695	Down
CD36	-1.23149	9.39911	-8.84874	3.48451e-17	2.712e-16	28.2558	Down
FAM110B	-1.21616	7.76499	-8.8428	3.64158e-17	2.8307e-16	28.2124	Down
RBM20	-1.46463	4.86968	-8.83272	3.92412e-17	3.04018e-16	28.1389	Down
TREML1	-1.05422	4.28088	-8.82457	4.16818e-17	3.22255e-16	28.0795	Down
COL6A2	-1.04047	14.8491	-8.82382	4.19127e-17	3.23771e-16	28.0741	Down
PRRX1	-1.40189	10.4571	-8.82221	4.24161e-17	3.27253e-16	28.0623	Down
SYN3	-1.53913	4.00925	-8.81773	4.38478e-17	3.37879e-16	28.0297	Down
NMRK2	-1.37042	1.83006	-8.81756	4.39012e-17	3.3815e-16	28.0285	Down
TMEM156	-1.12914	6.58136	-8.81663	4.42034e-17	3.40337e-16	28.0217	Down
EBF2	-1.36921	6.44074	-8.81651	4.42437e-17	3.40507e-16	28.0208	Down
C16orf54	-1.27217	7.50043	-8.81067	4.61985e-17	3.5458e-16	27.9783	Down
WSCD1	-1.34608	7.15918	-8.81065	4.62056e-17	3.5458e-16	27.9782	Down
GRIK1	-1.09684	4.52845	-8.81055	4.6238e-17	3.54682e-16	27.9775	Down
SLCO2A1	-1.1385	11.4179	-8.80913	4.67279e-17	3.58292e-16	27.9671	Down
PCDH10	-2.10991	4.62671	-8.8079	4.71536e-17	3.61408e-16	27.9582	Down
TTC16	-1.11077	4.1847	-8.80615	4.77675e-17	3.65962e-16	27.9455	Down
SRL	-1.15153	5.95619	-8.80482	4.82409e-17	3.69285e-16	27.9358	Down
SYCP3	-1.05067	5.93163	-8.80455	4.8338e-17	3.69876e-16	27.9338	Down
PALM2AKAP2	-1.2213	4.8858	-8.80421	4.84593e-17	3.70652e-16	27.9313	Down
COL16A1	-1.07132	11.352	-8.80264	4.90241e-17	3.74511e-16	27.9199	Down
CD300LB	-1.09428	5.2748	-8.80012	4.99458e-17	3.81083e-16	27.9016	Down
CD37	-1.19246	10.6334	-8.79883	5.04258e-17	3.84587e-16	27.8922	Down
C11orf21	-1.4012	5.59132	-8.79823	5.06468e-17	3.86115e-16	27.8879	Down
PPP2R3A	-1.07272	9.48574	-8.79801	5.07312e-17	3.86599e-16	27.8863	Down
NAIP	-1.10992	5.95048	-8.79487	5.19215e-17	3.94891e-16	27.8634	Down
CASS4	-1.04642	7.15977	-8.79486	5.19253e-17	3.94891e-16	27.8634	Down
PDE4B	-1.05765	10.1442	-8.7929	5.26825e-17	4.00159e-16	27.8491	Down
CD1C	-1.52715	6.23328	-8.7924	5.28794e-17	4.01328e-16	27.8455	Down
OR52N4	-1.35959	2.25716	-8.78617	5.53686e-17	4.19706e-16	27.8002	Down
TRIM17	-1.10799	6.63394	-8.78515	5.57872e-17	4.22707e-16	27.7928	Down
ZNF141	-1.22063	8.39062	-8.78337	5.65243e-17	4.27944e-16	27.7799	Down
PRSS35	-1.39343	4.68731	-8.78307	5.6649e-17	4.28713e-16	27.7777	Down
DES	-2.97746	12.1716	-8.78026	5.78354e-17	4.37159e-16	27.7573	Down
FMO1	-1.27151	7.06613	-8.77322	6.09191e-17	4.59162e-16	27.7063	Down
DAZL	-1.50474	4.20788	-8.77204	6.14554e-17	4.63017e-16	27.6976	Down
ADRB3	-1.67932	3.14918	-8.77127	6.18044e-17	4.65458e-16	27.6921	Down
SAMSN1	-1.06919	9.36136	-8.76513	6.46656e-17	4.86219e-16	27.6476	Down
C6orf163	-1.01242	5.12066	-8.76315	6.56199e-17	4.92997e-16	27.6331	Down
RASSF9	-1.33707	7.88052	-8.76266	6.58534e-17	4.94352e-16	27.6297	Down
FCER1A	-1.80973	5.19609	-8.76141	6.64652e-17	4.98542e-16	27.6206	Down
XAF1	-1.05995	9.90817	-8.75757	6.83727e-17	5.12231e-16	27.5927	Down
RUNDC3B	-1.12367	6.42335	-8.75522	6.95689e-17	5.20983e-16	27.5757	Down
PTPRS	-1.29568	10.8098	-8.75306	7.06831e-17	5.28689e-16	27.56	Down
ITM2A	-1.1719	9.62426	-8.74139	7.70273e-17	5.74526e-16	27.4755	Down
COL4A5	-1.60037	9.30621	-8.73761	7.91974e-17	5.90003e-16	27.4482	Down
FBXO17	-1.40224	8.11475	-8.72674	8.57914e-17	6.36833e-16	27.3695	Down
SYCP2L	-1.58223	4.10441	-8.72102	8.94742e-17	6.63642e-16	27.3282	Down
SFRP4	-2.26461	11.0035	-8.71932	9.06011e-17	6.71466e-16	27.3159	Down
RBP7	-1.04383	6.38378	-8.71523	9.33593e-17	6.90533e-16	27.2864	Down
CCL16	-1.31335	2.74146	-8.71318	9.47753e-17	7.00727e-16	27.2716	Down
KLHL13	-1.58003	7.59832	-8.71267	9.51363e-17	7.03117e-16	27.2679	Down
ACTG2	-2.24937	12.797	-8.71135	9.60623e-17	7.09679e-16	27.2583	Down
GPR26	-1.38556	1.76003	-8.71059	9.65975e-17	7.1335e-16	27.2529	Down
PYHIN1	-1.27304	7.10175	-8.71011	9.69398e-17	7.15594e-16	27.2494	Down
RAB39B	-1.33584	5.69184	-8.70892	9.77884e-17	7.21572e-16	27.2408	Down
PCDH15	-1.56345	2.57713	-8.70602	9.98918e-17	7.36509e-16	27.2199	Down
ZNF134	-1.11556	9.24488	-8.70426	1.01195e-16	7.45231e-16	27.2071	Down
FLRT1	-1.21695	5.29487	-8.70366	1.01638e-16	7.47906e-16	27.2028	Down
AOAH	-1.17632	8.80933	-8.70202	1.02869e-16	7.56659e-16	27.191	Down
LRCOL1	-1.11902	1.81748	-8.69934	1.04912e-16	7.70775e-16	27.1717	Down
HTR1F	-1.07978	3.31829	-8.69745	1.0638e-16	7.80635e-16	27.158	Down
TSPYL6	-1.12567	2.5003	-8.69676	1.06917e-16	7.8427e-16	27.1531	Down
CCDC152	-1.15061	6.70691	-8.6967	1.06966e-16	7.84318e-16	27.1526	Down
ZNF730	-1.40035	3.4383	-8.69515	1.08187e-16	7.92646e-16	27.1414	Down
SEZ6L	-1.63628	4.31916	-8.69343	1.09563e-16	8.02094e-16	27.129	Down
CD69	-1.25364	8.12673	-8.68898	1.13199e-16	8.27414e-16	27.0969	Down
GRIN2A	-1.92511	6.55985	-8.68795	1.14059e-16	8.33045e-16	27.0895	Down
CES1	-1.97678	8.16352	-8.68674	1.15071e-16	8.39782e-16	27.0808	Down
ATP2B3	-1.29216	2.23007	-8.67413	1.26211e-16	9.19273e-16	26.9899	Down
PAMR1	-1.01356	8.04056	-8.67395	1.26372e-16	9.20087e-16	26.9887	Down
ELAVL4	-1.33241	4.8429	-8.67133	1.2882e-16	9.37548e-16	26.9698	Down
FZD7	-1.01867	10.4981	-8.67106	1.2908e-16	9.3907e-16	26.9678	Down
FCRL3	-1.72765	6.95889	-8.66922	1.30826e-16	9.50658e-16	26.9546	Down
COPZ2	-1.02813	8.40727	-8.66562	1.34323e-16	9.75689e-16	26.9287	Down
MAPK4	-2.31451	5.49234	-8.66137	1.38567e-16	1.00455e-15	26.8981	Down
IRGM	-1.05652	2.2754	-8.65928	1.40698e-16	1.01922e-15	26.8831	Down
BTNL2	-1.15606	1.45058	-8.65638	1.43719e-16	1.03988e-15	26.8622	Down
SGCG	-1.45577	2.85797	-8.65248	1.4788e-16	1.06833e-15	26.8341	Down
MYL3	-1.40431	2.93605	-8.65111	1.49363e-16	1.07821e-15	26.8243	Down
GOLGA8O	-1.10127	1.85689	-8.65042	1.50125e-16	1.08329e-15	26.8193	Down
MEDAG	-1.3325	8.49334	-8.64268	1.58852e-16	1.14227e-15	26.7638	Down
P2RY10	-1.4478	7.17374	-8.64181	1.5987e-16	1.14915e-15	26.7575	Down
SYNDIG1	-1.37084	7.61219	-8.63776	1.64677e-16	1.18279e-15	26.7283	Down
DNM3	-1.00581	8.05777	-8.63564	1.67244e-16	1.19938e-15	26.7131	Down
GATA3	-1.01356	8.15967	-8.63397	1.69297e-16	1.21317e-15	26.7011	Down
ALDH1A2	-1.4841	5.698	-8.6333	1.70121e-16	1.21813e-15	26.6964	Down
ZNF85	-1.00279	7.41189	-8.62895	1.75615e-16	1.25603e-15	26.6651	Down
P2RY1	-1.09831	7.63466	-8.6264	1.78908e-16	1.27908e-15	26.6469	Down
CHL1	-1.45285	7.98659	-8.62621	1.79158e-16	1.28037e-15	26.6455	Down
MASP2	-1.09791	6.22387	-8.62602	1.79414e-16	1.28171e-15	26.6441	Down
MYCBPAP	-1.07096	4.70553	-8.6253	1.80352e-16	1.28743e-15	26.6389	Down
FMOD	-1.13135	12.3103	-8.62379	1.8235e-16	1.30119e-15	26.6281	Down
CCDC158	-1.05895	4.5991	-8.62028	1.87079e-16	1.33392e-15	26.6029	Down
GPNMB	-1.21889	12.6795	-8.61427	1.95461e-16	1.39048e-15	26.5599	Down
IQSEC3	-1.2612	6.51897	-8.61017	2.01391e-16	1.43133e-15	26.5305	Down
CLDN5	-1.12476	9.485	-8.6101	2.01501e-16	1.43133e-15	26.5299	Down
STAR	-1.10786	4.33735	-8.6072	2.05802e-16	1.4607e-15	26.5092	Down
PLIN4	-2.06014	8.18505	-8.60297	2.12249e-16	1.50467e-15	26.4788	Down
STAG3	-1.0491	7.95927	-8.60118	2.15032e-16	1.52215e-15	26.466	Down
RTL9	-1.23169	3.28059	-8.59942	2.17795e-16	1.53937e-15	26.4535	Down
GPR65	-1.03464	7.84443	-8.59258	2.28924e-16	1.61496e-15	26.4045	Down
CXCR5	-1.85496	3.83854	-8.59084	2.31844e-16	1.6337e-15	26.392	Down
PDK4	-1.59812	11.1226	-8.59046	2.32476e-16	1.63753e-15	26.3894	Down
NLRP3	-1.0609	7.26271	-8.58513	2.4168e-16	1.6998e-15	26.3512	Down
PTCHD1	-1.94232	5.73293	-8.58303	2.45391e-16	1.72505e-15	26.3362	Down
ZNF365	-1.3063	5.49813	-8.58296	2.45517e-16	1.72505e-15	26.3357	Down
CRLF1	-1.35578	6.71241	-8.58295	2.45548e-16	1.72505e-15	26.3356	Down
SLC25A27	-1.4373	6.89529	-8.58023	2.50443e-16	1.75744e-15	26.3162	Down
ZNF790	-1.17269	7.52919	-8.57764	2.55215e-16	1.78891e-15	26.2976	Down
GPR174	-1.54873	5.00251	-8.57467	2.60778e-16	1.82584e-15	26.2764	Down
FAM90A20P	-1.0214	1.15371	-8.57348	2.63049e-16	1.83966e-15	26.2679	Down
RAB40A	-1.1664	4.41628	-8.57339	2.63214e-16	1.84013e-15	26.2673	Down
ZNF737	-1.24519	7.75522	-8.57229	2.65328e-16	1.85351e-15	26.2594	Down
HSD11B1	-1.2509	7.23846	-8.57209	2.65712e-16	1.8555e-15	26.258	Down
MAP4K1	-1.12831	8.86814	-8.57142	2.67009e-16	1.86316e-15	26.2532	Down
PCDHGB5	-1.27468	6.58855	-8.57034	2.69121e-16	1.87649e-15	26.2455	Down
LMOD3	-1.163	4.51481	-8.56584	2.78052e-16	1.93586e-15	26.2134	Down
OXTR	-1.1783	7.08103	-8.56296	2.83932e-16	1.97533e-15	26.1928	Down
ZBTB10	-1.12726	10.1618	-8.5588	2.92647e-16	2.03291e-15	26.1631	Down
ZNF549	-1.14354	7.72661	-8.54308	3.2801e-16	2.26841e-15	26.0509	Down
CCR10	-1.01119	6.34665	-8.53995	3.3553e-16	2.31611e-15	26.0287	Down
CHST3	-1.06895	10.0337	-8.53498	3.4784e-16	2.39931e-15	25.9933	Down
PIRT	-1.56737	3.35345	-8.53428	3.49616e-16	2.40978e-15	25.9882	Down
KLHL30	-1.25995	5.32748	-8.53374	3.50984e-16	2.41742e-15	25.9844	Down
MS4A14	-1.01914	6.56315	-8.53034	3.59751e-16	2.47505e-15	25.9602	Down
GRIK4	-1.22092	4.49936	-8.52909	3.63011e-16	2.49656e-15	25.9513	Down
MAMLD1	-1.01883	8.45943	-8.52684	3.68972e-16	2.53662e-15	25.9353	Down
CLEC3B	-1.13494	7.30505	-8.52616	3.70812e-16	2.5482e-15	25.9304	Down
ABRA	-1.25529	2.95855	-8.5256	3.72308e-16	2.55577e-15	25.9264	Down
CDH10	-1.65759	2.42528	-8.52305	3.7925e-16	2.59963e-15	25.9083	Down
ZNF804A	-1.23943	5.41896	-8.52276	3.80041e-16	2.6031e-15	25.9062	Down
RGS2	-1.04617	10.9456	-8.51768	3.94285e-16	2.69868e-15	25.8701	Down
THEMIS	-1.33864	7.11465	-8.51617	3.98621e-16	2.72736e-15	25.8593	Down
KCNG1	-1.56218	6.10611	-8.51392	4.0517e-16	2.77013e-15	25.8433	Down
SELENOP	-1.29124	11.6076	-8.50677	4.26649e-16	2.91163e-15	25.7925	Down
CFAP91	-1.76063	6.00757	-8.50526	4.31348e-16	2.94154e-15	25.7818	Down
ZNF559	-1.03421	8.40919	-8.50244	4.40225e-16	2.99988e-15	25.7617	Down
APBB1IP	-1.14704	10.1856	-8.50134	4.43736e-16	3.02048e-15	25.7539	Down
CNTNAP3	-1.51247	5.66992	-8.49687	4.58308e-16	3.11626e-15	25.7222	Down
GLIS1	-1.16164	6.00133	-8.4938	4.68603e-16	3.18394e-15	25.7003	Down
CORIN	-1.29233	7.19118	-8.48736	4.90908e-16	3.3282e-15	25.6546	Down
NPTX1	-2.20355	6.03448	-8.48614	4.95263e-16	3.35528e-15	25.646	Down
MYO16	-1.15717	5.40762	-8.4839	5.03339e-16	3.40751e-15	25.6301	Down
BMP3	-2.47731	5.41675	-8.48308	5.06308e-16	3.42512e-15	25.6243	Down
ELAPOR2	-1.55041	8.40518	-8.48231	5.09135e-16	3.44175e-15	25.6188	Down
CD1E	-1.49412	5.3426	-8.47731	5.27845e-16	3.55918e-15	25.5833	Down
C16orf96	-1.14323	3.21187	-8.47365	5.41965e-16	3.65174e-15	25.5574	Down
SNX31	-1.41336	3.36625	-8.46942	5.58756e-16	3.7608e-15	25.5274	Down
DMPK	-1.00427	10.7951	-8.46832	5.63227e-16	3.78952e-15	25.5196	Down
SLAMF6	-1.2574	8.40402	-8.4682	5.63691e-16	3.79127e-15	25.5188	Down
CMA1	-1.67886	2.92427	-8.46759	5.66164e-16	3.80378e-15	25.5145	Down
LOXL4	-1.33999	7.44948	-8.46486	5.77438e-16	3.87533e-15	25.4951	Down
HPSE2	-1.63252	4.4758	-8.46442	5.79274e-16	3.88625e-15	25.492	Down
PRKAA2	-2.09728	7.3553	-8.46378	5.81959e-16	3.90286e-15	25.4874	Down
MKX	-1.60756	6.49597	-8.45876	6.03397e-16	4.04081e-15	25.4519	Down
C4orf50	-1.22924	2.90128	-8.45869	6.03688e-16	4.0413e-15	25.4514	Down
CCDC154	-1.18556	4.48885	-8.45722	6.1013e-16	4.08296e-15	25.441	Down
CD3G	-1.13357	8.39354	-8.45591	6.15897e-16	4.11711e-15	25.4317	Down
TSKS	-1.30498	3.23971	-8.45504	6.19781e-16	4.1401e-15	25.4255	Down
IGFN1	-1.90867	4.27053	-8.45412	6.23892e-16	4.16607e-15	25.419	Down
FCMR	-1.17577	9.01292	-8.45355	6.2645e-16	4.17915e-15	25.415	Down
SMTN	-1.05083	12.7477	-8.45159	6.35366e-16	4.23661e-15	25.4011	Down
HRNR	-1.32655	2.83796	-8.44853	6.49529e-16	4.32795e-15	25.3795	Down
ZNF534	-1.18634	2.59286	-8.44647	6.59226e-16	4.38785e-15	25.3649	Down
TMEM71	-1.03459	6.78107	-8.44581	6.62384e-16	4.40729e-15	25.3602	Down
PPM1E	-1.41989	5.32541	-8.44168	6.82338e-16	4.53682e-15	25.3311	Down
KCNA4	-1.32124	1.7499	-8.4407	6.87195e-16	4.56748e-15	25.3241	Down
SLC7A3	-1.4416	2.53055	-8.43799	7.00711e-16	4.65399e-15	25.3049	Down
GLIPR1L1	-1.02082	3.87812	-8.43492	7.16349e-16	4.75616e-15	25.2833	Down
BRINP3	-1.83344	3.51742	-8.43275	7.27641e-16	4.82769e-15	25.2679	Down
CLEC9A	-1.19986	3.89828	-8.43262	7.28298e-16	4.83032e-15	25.267	Down
ZNF256	-1.21148	6.8651	-8.43209	7.31061e-16	4.8452e-15	25.2633	Down
RGS4	-1.35208	8.15904	-8.42971	7.43716e-16	4.92556e-15	25.2464	Down
SYT2	-1.09661	5.55267	-8.42794	7.53228e-16	4.98324e-15	25.2339	Down
CD40LG	-1.23639	6.3467	-8.41924	8.01798e-16	5.29329e-15	25.1725	Down
GDAP1L1	-1.31592	3.86197	-8.41797	8.09138e-16	5.33796e-15	25.1636	Down
LY86	-1.06947	8.0719	-8.41714	8.14025e-16	5.3645e-15	25.1576	Down
SERPINE2	-1.21209	10.7965	-8.41692	8.15262e-16	5.37075e-15	25.1562	Down
EGR2	-1.18371	8.9783	-8.41676	8.16234e-16	5.37335e-15	25.155	Down
GRIK2	-1.3692	4.16871	-8.41615	8.19783e-16	5.3948e-15	25.1507	Down
SIGLEC1	-1.28279	9.70617	-8.41511	8.25979e-16	5.43174e-15	25.1433	Down
KCNA1	-2.12506	3.09649	-8.41319	8.37425e-16	5.50312e-15	25.1298	Down
IKZF3	-1.30203	10.5604	-8.41052	8.53638e-16	5.60571e-15	25.111	Down
ANO5	-1.81752	7.68988	-8.40888	8.63744e-16	5.66972e-15	25.0994	Down
RXRG	-1.41758	3.37523	-8.40669	8.77424e-16	5.75379e-15	25.084	Down
PCDH11X	-1.53838	2.45485	-8.40464	8.90421e-16	5.83222e-15	25.0695	Down
LONRF2	-1.9139	7.33945	-8.4014	9.11334e-16	5.95727e-15	25.0467	Down
CACNA1G	-1.25418	4.43836	-8.39853	9.3032e-16	6.06518e-15	25.0264	Down
LIN7A	-1.10479	7.35896	-8.39851	9.30449e-16	6.06518e-15	25.0263	Down
PCDHGB4	-1.19708	5.11848	-8.39647	9.44191e-16	6.15045e-15	25.0119	Down
VWF	-1.00348	13.1723	-8.39619	9.46067e-16	6.16052e-15	25.0099	Down
LYVE1	-1.21191	7.59201	-8.39525	9.52443e-16	6.19987e-15	25.0033	Down
LUZP2	-1.5893	4.96863	-8.39427	9.59169e-16	6.24147e-15	24.9964	Down
LVRN	-1.36863	3.94831	-8.39004	9.887e-16	6.42466e-15	24.9666	Down
CPVL	-1.20877	10.6882	-8.38914	9.95121e-16	6.46186e-15	24.9603	Down
NELL2	-1.39306	6.92735	-8.38642	1.01472e-15	6.58222e-15	24.9411	Down
PCDHB12	-1.01405	6.50619	-8.38428	1.03039e-15	6.66301e-15	24.9261	Down
FBXO40	-1.23599	2.06597	-8.38292	1.04044e-15	6.72096e-15	24.9165	Down
ADAM22	-1.17131	8.26449	-8.37826	1.07573e-15	6.9416e-15	24.8838	Down
FCRLA	-1.91272	6.22874	-8.37822	1.07608e-15	6.9416e-15	24.8834	Down
TDRD6	-1.04108	7.06646	-8.37741	1.08231e-15	6.9769e-15	24.8778	Down
PDCD1LG2	-1.07327	7.4256	-8.37588	1.09425e-15	7.05146e-15	24.867	Down
ST8SIA2	-1.39544	4.63112	-8.37456	1.10464e-15	7.11347e-15	24.8577	Down
IL5	-1.03179	2.54776	-8.36581	1.17597e-15	7.54151e-15	24.7962	Down
HMGCLL1	-1.36869	3.12817	-8.36376	1.19341e-15	7.64546e-15	24.7818	Down
SUGCT	-1.09061	6.67401	-8.36163	1.21168e-15	7.75716e-15	24.7668	Down
SPN	-1.0713	9.64698	-8.35573	1.26392e-15	8.08049e-15	24.7254	Down
GOLGA6L4	-1.10168	2.17934	-8.35431	1.27678e-15	8.15993e-15	24.7154	Down
CD300LG	-1.44896	2.93627	-8.35391	1.28044e-15	8.17768e-15	24.7126	Down
COL6A6	-1.22597	4.63772	-8.34138	1.40034e-15	8.922e-15	24.6247	Down
FGF13	-1.35561	7.12361	-8.34033	1.41083e-15	8.97658e-15	24.6173	Down
CD96	-1.10051	9.12777	-8.33609	1.45417e-15	9.23026e-15	24.5876	Down
HEPACAM	-1.3548	2.25582	-8.33197	1.49764e-15	9.49319e-15	24.5587	Down
SLC6A15	-1.85682	2.91933	-8.31995	1.63157e-15	1.03176e-14	24.4745	Down
DIRAS1	-1.65293	5.91612	-8.3182	1.65206e-15	1.04436e-14	24.4623	Down
WNT1	-1.17028	2.86592	-8.3177	1.65793e-15	1.04736e-14	24.4588	Down
SASH3	-1.09108	9.77044	-8.31609	1.67715e-15	1.05878e-14	24.4475	Down
LDHAL6A	-1.1084	4.30703	-8.31522	1.68758e-15	1.065e-14	24.4414	Down
MMP2	-1.12928	13.914	-8.3147	1.69379e-15	1.06856e-14	24.4378	Down
GATA1	-1.02121	2.85227	-8.31342	1.70931e-15	1.07799e-14	24.4288	Down
MYH13	-1.34974	3.57408	-8.30129	1.86348e-15	1.17147e-14	24.344	Down
ADGRL3	-1.38248	7.94429	-8.29791	1.90884e-15	1.19814e-14	24.3204	Down
ABCA4	-1.08415	4.32258	-8.29759	1.91327e-15	1.20052e-14	24.3181	Down
CADM1	-1.20108	9.62946	-8.29753	1.914e-15	1.20057e-14	24.3177	Down
NR2E3	-1.05094	3.34314	-8.29559	1.9407e-15	1.21609e-14	24.3041	Down
KCNK2	-1.95359	4.77475	-8.29484	1.95103e-15	1.22215e-14	24.2989	Down
EMILIN3	-1.2538	5.16387	-8.29252	1.98348e-15	1.2408e-14	24.2827	Down
KLRK1	-1.26136	3.96538	-8.28905	2.03305e-15	1.27011e-14	24.2584	Down
MYOC	-2.45062	4.26116	-8.28851	2.04081e-15	1.27453e-14	24.2547	Down
EFR3B	-1.17932	7.40033	-8.28454	2.09925e-15	1.30927e-14	24.227	Down
MAS1L	-1.05532	1.15834	-8.28347	2.11526e-15	1.31837e-14	24.2195	Down
ZNF98	-1.53375	2.52885	-8.28058	2.15917e-15	1.34304e-14	24.1993	Down
KLRF1	-1.0678	3.91749	-8.28048	2.16077e-15	1.34359e-14	24.1986	Down
L3MBTL4	-1.3311	6.84961	-8.28029	2.16367e-15	1.34494e-14	24.1973	Down
IL7R	-1.13945	10.4069	-8.2802	2.16506e-15	1.34536e-14	24.1966	Down
TDRD9	-1.5994	5.16333	-8.27657	2.22159e-15	1.37818e-14	24.1713	Down
IQCN	-1.0811	7.81845	-8.27228	2.29031e-15	1.41893e-14	24.1414	Down
EOMES	-1.36726	7.38643	-8.27047	2.31987e-15	1.43632e-14	24.1288	Down
TSPOAP1	-1.15916	8.61815	-8.26909	2.34279e-15	1.44902e-14	24.1192	Down
PLA2R1	-1.07691	9.11588	-8.26663	2.38392e-15	1.473e-14	24.1021	Down
CCN3	-1.29046	8.26705	-8.2622	2.46006e-15	1.51803e-14	24.0712	Down
GADL1	-1.38139	2.35533	-8.2607	2.48653e-15	1.53284e-14	24.0607	Down
LYG2	-1.17355	4.20434	-8.26064	2.48746e-15	1.5329e-14	24.0603	Down
BAALC	-1.11769	5.25555	-8.25404	2.60662e-15	1.60422e-14	24.0143	Down
POMC	-1.15531	5.17072	-8.25348	2.61702e-15	1.60955e-14	24.0104	Down
EBF4	-1.1043	9.12967	-8.25249	2.63551e-15	1.6202e-14	24.0035	Down
TRIM63	-1.31283	2.76043	-8.25241	2.637e-15	1.62023e-14	24.003	Down
ACSBG2	-1.00685	3.7311	-8.24544	2.7706e-15	1.69913e-14	23.9544	Down
VAT1L	-1.19963	7.32676	-8.24398	2.79932e-15	1.71584e-14	23.9443	Down
GALNT15	-1.29764	7.47586	-8.24137	2.85154e-15	1.74571e-14	23.9261	Down
LILRA1	-1.03015	5.94227	-8.23683	2.94476e-15	1.80101e-14	23.8946	Down
ID4	-1.0569	9.17305	-8.23479	2.98758e-15	1.8266e-14	23.8804	Down
CARMIL2	-1.16482	8.17896	-8.23292	3.02726e-15	1.84964e-14	23.8674	Down
KRBOX1	-1.475	3.50279	-8.23224	3.04205e-15	1.85807e-14	23.8626	Down
DPYSL5	-1.85707	3.7741	-8.23104	3.068e-15	1.8733e-14	23.8543	Down
KIF6	-1.42577	4.89159	-8.22849	3.12367e-15	1.90604e-14	23.8366	Down
TLR4	-1.04394	9.5552	-8.22838	3.12629e-15	1.90702e-14	23.8358	Down
TBC1D10C	-1.07594	8.5066	-8.22713	3.15398e-15	1.92327e-14	23.8271	Down
CREB5	-1.03442	8.69256	-8.22584	3.18291e-15	1.93965e-14	23.8182	Down
ZNF80	-1.29913	3.28502	-8.21813	3.36118e-15	2.0456e-14	23.7647	Down
CAV1	-1.00113	11.8691	-8.2168	3.39301e-15	2.06363e-14	23.7554	Down
BSN	-1.24983	6.83181	-8.21517	3.43228e-15	2.08683e-14	23.7441	Down
TNFRSF13B	-1.70064	5.17771	-8.20984	3.56405e-15	2.16624e-14	23.7071	Down
PTHLH	-1.17071	6.90688	-8.20795	3.61179e-15	2.19382e-14	23.694	Down
F2RL2	-1.21589	9.9059	-8.20516	3.68388e-15	2.23397e-14	23.6746	Down
SLIT1	-1.34715	5.53817	-8.20422	3.70838e-15	2.24809e-14	23.6681	Down
CACNG1	-1.11421	1.85018	-8.20396	3.71511e-15	2.25144e-14	23.6663	Down
RAB37	-1.06686	7.6547	-8.20382	3.71881e-15	2.25222e-14	23.6654	Down
COL3A1	-1.16991	16.578	-8.20202	3.76625e-15	2.27947e-14	23.6529	Down
DIRAS3	-1.30902	6.21572	-8.18934	4.11894e-15	2.48163e-14	23.565	Down
PKD1L2	-1.3865	4.8307	-8.18692	4.18972e-15	2.52183e-14	23.5483	Down
KCTD12	-1.03683	12.9715	-8.1776	4.47434e-15	2.68966e-14	23.4838	Down
LDHAL6B	-1.02281	4.30395	-8.17489	4.5605e-15	2.73822e-14	23.465	Down
PHYHIP	-1.08875	6.53143	-8.17191	4.65726e-15	2.7942e-14	23.4444	Down
CHRM5	-1.16643	4.02281	-8.1717	4.6642e-15	2.79747e-14	23.443	Down
NEFM	-1.36934	3.78947	-8.17061	4.69991e-15	2.81798e-14	23.4355	Down
DCX	-1.83443	4.15173	-8.16917	4.74792e-15	2.84401e-14	23.4255	Down
EYA4	-1.45488	6.06704	-8.16851	4.76988e-15	2.85625e-14	23.421	Down
RAPSN	-1.2421	3.62669	-8.16524	4.88121e-15	2.9201e-14	23.3983	Down
MAB21L2	-1.60292	4.26074	-8.16302	4.95809e-15	2.96323e-14	23.383	Down
CLEC12A	-1.23007	6.03269	-8.15211	5.35332e-15	3.18819e-14	23.3077	Down
MAPK8IP1	-1.1987	8.65939	-8.15125	5.38604e-15	3.20665e-14	23.3017	Down
PER3	-1.00104	10.3822	-8.14862	5.48635e-15	3.26428e-14	23.2836	Down
TTC23L	-1.11174	3.69554	-8.14632	5.57594e-15	3.31229e-14	23.2676	Down
CHRNA3	-1.7859	6.2615	-8.14584	5.59456e-15	3.32229e-14	23.2644	Down
BANK1	-1.31636	8.5717	-8.1441	5.66332e-15	3.36098e-14	23.2524	Down
GPR142	-1.41861	3.18636	-8.14339	5.69182e-15	3.37682e-14	23.2475	Down
MC5R	-1.34005	2.2368	-8.13892	5.87345e-15	3.47903e-14	23.2166	Down
DCC	-1.33361	4.30353	-8.1345	6.05854e-15	3.58525e-14	23.1862	Down
TMEM121	-1.00473	6.58371	-8.1311	6.20472e-15	3.66128e-14	23.1627	Down
POU3F1	-1.25879	4.60124	-8.1307	6.22235e-15	3.67052e-14	23.16	Down
GABRR2	-1.11731	4.40539	-8.12995	6.25509e-15	3.68866e-14	23.1548	Down
AK5	-1.15257	5.22225	-8.12808	6.33758e-15	3.73612e-14	23.1419	Down
CLEC12B	-1.12004	2.11457	-8.12724	6.37542e-15	3.75724e-14	23.1361	Down
PCDHA7	-1.11574	2.66099	-8.12686	6.39217e-15	3.76592e-14	23.1335	Down
RRAGD	-1.016	9.10504	-8.12618	6.423e-15	3.78288e-14	23.1288	Down
IL1RAPL1	-1.27233	3.5762	-8.12329	6.55425e-15	3.85531e-14	23.1089	Down
CCL21	-1.91445	9.78587	-8.12117	6.65234e-15	3.91053e-14	23.0944	Down
CCR5	-1.12609	8.47003	-8.12035	6.69085e-15	3.93193e-14	23.0887	Down
TNFRSF13C	-1.40992	7.73755	-8.12001	6.70708e-15	3.94023e-14	23.0863	Down
MAPT	-1.49385	6.98029	-8.11883	6.7625e-15	3.97153e-14	23.0782	Down
CHRM2	-2.49427	5.46456	-8.11541	6.92686e-15	4.05984e-14	23.0547	Down
ODAD4	-1.09321	5.39689	-8.11193	7.09767e-15	4.15134e-14	23.0307	Down
SELL	-1.18028	9.55381	-8.10781	7.30551e-15	4.26754e-14	23.0024	Down
LARP6	-1.11647	8.43052	-8.09801	7.82463e-15	4.55365e-14	22.935	Down
SMIM10L2B	-1.08906	5.37723	-8.09498	7.99231e-15	4.64978e-14	22.9142	Down
DPP6	-1.90702	4.69905	-8.08948	8.30586e-15	4.82466e-14	22.8764	Down
RAB39A	-1.21777	5.12458	-8.08168	8.77115e-15	5.08699e-14	22.8229	Down
TEX26	-1.12915	1.92566	-8.08041	8.84964e-15	5.12932e-14	22.8142	Down
CERS4	-1.27049	9.0336	-8.0765	9.09441e-15	5.26791e-14	22.7874	Down
FAM217A	-1.03809	3.27368	-8.07509	9.18433e-15	5.31503e-14	22.7777	Down
CCR7	-1.39336	7.98528	-8.07376	9.27058e-15	5.36328e-14	22.7686	Down
SP140	-1.05169	8.22767	-8.07366	9.27678e-15	5.3652e-14	22.7679	Down
DPYD	-1.02614	10.3116	-8.07184	9.39531e-15	5.42869e-14	22.7555	Down
WNT9A	-1.46093	7.36873	-8.07005	9.51369e-15	5.49539e-14	22.7432	Down
SEL1L2	-1.254	2.20552	-8.06999	9.51793e-15	5.49614e-14	22.7427	Down
TSPYL5	-1.34295	8.9188	-8.063	9.99384e-15	5.7638e-14	22.6948	Down
MMP23B	-1.0974	5.50089	-8.06276	1.00102e-14	5.77147e-14	22.6932	Down
NGF	-1.20617	4.18274	-8.0509	1.08735e-14	6.25755e-14	22.612	Down
RHOH	-1.05455	8.54588	-8.04919	1.10044e-14	6.32899e-14	22.6003	Down
[truncated: 958 more rows]
