# Supplementary material for: Immune infiltration and prognosis in gastric cancer: role of NAD+ metabolism-related markers
Source: PeerJ. 2024 Jul 31;12:e17833. doi: 10.7717/peerj.17833 (PMC11297443; doi:10.7717/peerj.17833)
Supplement: Supplemental Information 6 [file peerj-12-17833-s006.xlsx]

## Sheet: Sheet1
ONTOLOGY	ID	setSize	enrichmentScore	NES	pvalue	p.adjust	qvalues	rank	leading_edge	core_enrichment
GO:0007156	BP	homophilic cell adhesion via plasma membrane adhesion molecules	167	0.632365	1.90525	1e-10	8.62333e-09	6.40585e-09	4761	tags=69%, list=26%, signal=52%	57863/28513/83872/5101/57575/120114/6900/91156/11122/57453/26167/152404/56134/3897/54798/57526/79633/56135/152330/1008/91624/56145/84623/9499/56112/65217/56131/27328/55714/26025/56138/64072/56100/56144/60437/5979/7216/56099/56139/5098/1000/54549/5099/128434/1009/23022/56098/64405/56111/56130/56097/56101/23363/56137/56113/29930/5797/8642/56121/56107/8832/6091/221935/56132/64084/23705/8641/56129/60…
GO:0098889	CC	intrinsic component of presynaptic membrane	73	0.651113	1.86882	1e-10	8.62333e-09	6.40585e-09	3460	tags=62%, list=19%, signal=50%	1268/57863/1272/3736/3356/2901/401190/22854/2823/8745/2558/1008/3737/53826/3738/5789/491/2066/148/6326/1000/6506/2043/2550/492/5023/493/8973/2900/1812/2913/3746/1813/1141/5028/6532/1949/84628/135/4985/27255/53942/112476/27253/4988
GO:0098742	BP	cell-cell adhesion via plasma-membrane adhesion molecules	276	0.60169	1.84423	1e-10	8.62333e-09	6.40585e-09	3693	tags=57%, list=20%, signal=46%	57863/28513/22871/83872/5101/57575/22865/120114/6403/6900/10178/91156/11122/57453/22854/26167/8404/57689/152404/145581/56134/3897/54798/57526/26011/79633/56135/152330/1008/91624/56145/84623/5010/9499/5789/56112/10082/65217/56131/9071/27328/55714/9370/26025/56138/64072/56100/56144/60437/5979/7216/56099/57451/56139/23284/5098/1000/54549/5099/128434/84631/869/1009/23022/1600/56098/64405/56111/56130/…
GO:0098936	CC	intrinsic component of postsynaptic membrane	123	0.616532	1.83068	1e-10	8.62333e-09	6.40585e-09	4751	tags=68%, list=26%, signal=51%	1272/2045/4916/22871/3736/3356/22865/2901/6900/401190/2890/729993/2903/347730/57689/145581/22986/27092/2558/1008/53826/57502/3738/2894/9890/491/2066/148/1000/6546/54413/1630/2043/2566/2550/5802/5023/388336/3751/8828/8973/2900/1812/2913/64084/3746/1813/94030/1141/53616/3752/57555/6532/9127/1949/59284/26045/1742/2561/135/107/5100/2555/9746/4985/347731/114798/22829/2895/27253/4988/23767/64101/146395…
GO:0099240	CC	intrinsic component of synaptic membrane	159	0.606168	1.82341	1e-10	8.62333e-09	6.40585e-09	3512	tags=57%, list=19%, signal=46%	1268/57863/1272/2045/4916/22871/3736/3356/22865/2901/6900/401190/2890/729993/2903/347730/22854/2823/8745/57689/145581/22986/27092/2558/1008/3737/53826/57502/3738/2894/5789/9890/491/2066/2567/148/6326/1000/6546/54413/1630/6506/2043/2566/2550/5802/492/5023/493/388336/3751/8828/8973/2900/1812/2913/64084/3746/1813/94030/1141/53616/3752/57555/5028/6532/9127/1949/59284/26045/1742/84628/2561/135/107/510…
GO:0035637	BP	multicellular organismal signaling	159	0.60392	1.81665	1e-10	8.62333e-09	6.40585e-09	4300	tags=57%, list=23%, signal=44%	6332/477/845/287/5350/6327/29119/3736/54112/10060/23114/11280/7143/9607/482/6330/6543/27092/6262/3741/3737/7220/4915/783/55800/2316/6328/491/8912/775/6508/8506/6547/781/6326/9096/83700/23704/6546/2898/2852/3757/10052/57731/10699/492/5023/493/3762/552/1816/3751/8913/1901/6335/6331/1812/183/6329/6910/1133/3752/1143/10021/4099/3670/30845/10242/6323/8911/59284/149461/6324/857/6334/2697/27094/51738/37…
GO:0042734	CC	presynaptic membrane	141	0.60827	1.81465	1e-10	8.62333e-09	6.40585e-09	4751	tags=64%, list=26%, signal=48%	1268/57863/1272/9892/22999/3736/3356/9378/2901/401190/2903/22854/2823/8745/6616/386617/2899/440279/2558/1008/3737/53826/3738/5789/491/2066/23208/8506/148/6326/1000/5138/2898/2852/85445/6506/2043/57528/2550/492/9699/5023/493/6857/8973/6530/9627/2900/1812/2913/3746/1813/94030/1141/133396/57555/9783/5028/6532/1949/84628/320/115207/135/3756/5100/4985/112755/27255/8676/26059/53942/1759/112476/27253/49…
GO:0005201	MF	extracellular matrix structural constituent	171	0.601281	1.81218	1e-10	8.62333e-09	6.40585e-09	5202	tags=68%, list=28%, signal=50%	4969/5549/25890/8483/1310/10418/83872/7148/1285/22915/7373/1311/2192/4239/127435/1286/256158/4256/1295/8076/2006/3908/2202/1805/10216/81578/1288/10875/4052/10516/1287/54829/1296/7007/84570/2199/8406/2200/9370/1634/10117/4148/4053/84467/7057/7980/3371/7058/165/4060/11117/79875/157869/50939/90187/2335/131873/256076/1462/169044/1300/1281/1293/3730/8292/4147/1297/3910/2331/79812/10085/27286/1307/3000…
GO:0051963	BP	regulation of synapse assembly	101	0.619076	1.8112	1e-10	8.62333e-09	6.40585e-09	3315	tags=55%, list=18%, signal=46%	4593/2045/26050/4916/22871/4884/22865/9378/577/57633/23768/257194/347730/145581/139065/9423/4915/5789/10082/4208/8128/79953/575/23316/6585/84189/84631/869/54413/7058/11141/266727/158038/4914/6622/64084/54674/6092/26280/94030/5021/1141/8292/57555/27286/26045/7476/84628/375323/57463/9746/347731/114798/51738/22943/2895
GO:0099055	CC	integral component of postsynaptic membrane	118	0.609641	1.80524	1e-10	8.62333e-09	6.40585e-09	4751	tags=68%, list=26%, signal=51%	2045/4916/22871/3736/3356/22865/2901/2890/729993/2903/347730/57689/145581/22986/27092/2558/1008/53826/57502/3738/2894/9890/491/2066/148/1000/6546/54413/1630/2043/2566/2550/5802/5023/388336/3751/8828/8973/2900/1812/2913/64084/3746/1813/94030/1141/53616/3752/57555/6532/9127/1949/59284/26045/2561/135/107/5100/2555/9746/4985/347731/114798/22829/2895/27253/4988/23767/64101/146395/8829/116443/2557/6531…
GO:0007416	BP	synapse assembly	178	0.59829	1.80432	1e-10	8.62333e-09	6.40585e-09	3512	tags=54%, list=19%, signal=45%	4593/2045/26050/4916/22871/4884/22865/9378/577/57633/119/55203/23768/257194/347730/91156/9379/2823/26167/2596/145581/139065/9423/266743/84623/4915/57502/5789/10082/56131/27445/4131/2066/4208/8128/23284/140689/1000/54549/79953/575/23316/2258/6585/84189/84631/869/54413/7058/2566/56130/11141/23363/266727/158038/4914/8927/6622/221935/56132/1812/64084/54674/1813/6092/26280/94030/5021/56125/1141/8292/5…
GO:0061337	BP	cardiac conduction	93	0.616243	1.79611	1e-10	8.62333e-09	6.40585e-09	4086	tags=55%, list=22%, signal=43%	477/845/287/5350/6327/29119/10060/482/6330/6543/6262/3741/7220/783/55800/2316/491/775/6508/6547/781/9096/23704/6546/3757/10052/57731/10699/492/493/3762/8913/6331/183/6910/3752/10021/3670/30845/6324/857/2697/3753/3270/81033/2702/59272/4205/5144/51086/1482
GO:0008201	MF	heparin binding	166	0.592544	1.78538	1e-10	8.62333e-09	6.40585e-09	3850	tags=52%, list=21%, signal=41%	7060/64388/6422/5549/9353/84870/284654/340419/7148/2255/151887/2252/1511/11095/1311/338/6403/10178/64094/2247/6586/8839/1991/84570/2200/4057/79625/26279/10563/3075/4053/149998/1842/4753/7057/5788/6585/9510/83716/6649/7058/7049/5764/2260/5802/9508/4856/8828/50939/2335/11167/10457/5270/2254/51816/146760/6402/6368/3730/8292/7123/8840/26577/5104/5727/1490/30008/4018/7448/4745/4353/11096/129804/4023/8…
GO:0019955	MF	cytokine binding	141	0.596332	1.77904	1e-10	8.62333e-09	6.40585e-09	5192	tags=65%, list=28%, signal=47%	64388/26585/1311/2532/643/2247/2690/3815/1991/4052/124857/3977/2/1233/1236/3568/9241/2829/64109/7057/658/9244/3953/1524/8200/3554/7049/135228/729230/7043/8646/8828/3690/222663/9173/3587/948/3676/25928/2615/133396/1237/1234/10803/3572/4054/3593/1438/8322/2826/1436/8425/3592/10148/3590/375387/1238/3570/7852/116379/199713/7048/9180/1235/659/8809/3581/8829/147138/920/3594/57045/1271/3604/1230/3595/35…
GO:0060078	BP	regulation of postsynaptic membrane potential	129	0.595267	1.76989	1e-10	8.62333e-09	6.40585e-09	5138	tags=67%, list=28%, signal=49%	22871/5649/22999/3736/9378/2901/401190/2890/2903/120892/1136/22953/152404/6543/2899/2558/388135/266743/57502/2894/2743/124925/2567/6547/4208/50944/2898/23316/5999/4355/869/54413/154/2566/2550/9699/5023/8001/3751/8973/6622/2900/2564/1813/66000/56853/1141/1143/57555/2570/5027/2897/9127/7476/84866/1742/2561/135/1760/5026/2555/112755/85358/51738/7442/2895/642938/4988/2892/2911/2560/116443/2741/2557/1…
GO:0062023	CC	collagen-containing extracellular matrix	422	0.570992	1.76871	1e-10	8.62333e-09	6.40585e-09	5346	tags=61%, list=29%, signal=45%	4969/7060/6422/9068/5549/25890/8483/4958/4653/1310/6423/10418/5803/26585/83872/158326/7148/2255/151887/1285/22915/1511/7373/11095/1311/2662/10218/2192/4239/127435/1286/256158/4256/7044/64094/1295/8076/63923/2006/22854/7143/26033/4684/3908/2202/284297/8404/1805/23671/10216/2162/81578/3897/1288/9423/1215/80760/1359/1991/10875/4052/10516/1287/54829/1296/7007/84570/10082/2199/8406/341640/51435/7482/2…
GO:0099699	CC	integral component of synaptic membrane	149	0.590539	1.76655	1e-10	8.62333e-09	6.40585e-09	3512	tags=55%, list=19%, signal=45%	1268/57863/2045/4916/22871/3736/3356/22865/2901/2890/729993/2903/347730/2823/8745/57689/145581/22986/27092/2558/1008/3737/53826/57502/3738/2894/5789/9890/491/2066/2567/148/6326/1000/6546/54413/1630/6506/2043/2566/2550/5802/492/5023/493/388336/3751/8828/8973/2900/1812/2913/64084/3746/1813/94030/1141/53616/3752/57555/5028/6532/9127/1949/59284/26045/2561/135/107/5100/2555/9746/4985/347731/114798/228…
GO:0034703	CC	cation channel complex	219	0.579787	1.76294	1e-10	8.62333e-09	6.40585e-09	4724	tags=61%, list=25%, signal=46%	6332/845/3745/3778/6327/3736/2901/2890/3776/729993/10060/2903/11280/1804/30820/9472/56479/57628/6330/3788/27092/1261/3779/2899/785/6262/3741/3737/7220/783/3738/3755/55800/6263/286097/6328/774/375567/8912/775/777/781/6326/285175/2898/170850/2891/219527/3757/55799/3739/7223/388336/3762/3750/3751/8913/6335/1258/2900/6331/5311/3746/6329/3787/3790/168507/6261/3752/126129/10021/7222/2893/9312/3764/3780…
GO:0042383	CC	sarcolemma	131	0.592363	1.76252	1e-10	8.62333e-09	6.40585e-09	3683	tags=53%, list=20%, signal=43%	1674/477/3745/287/23336/5239/2318/28965/4842/6442/844/3908/9472/1756/11149/54221/81493/6444/6543/27092/6262/6517/9499/783/5348/64091/6263/775/113146/8082/6547/6445/148/781/6326/1000/6546/361/7043/493/8910/7412/6331/825/5152/5962/7402/1293/6261/6769/3752/3764/6833/64208/786/6323/90342/59284/59285/779/1292/6324/358/857/633/79026/4988/84033/342667/8291
GO:0031674	CC	I band	139	0.590847	1.76175	1e-10	8.62333e-09	6.40585e-09	3949	tags=52%, list=21%, signal=41%	1674/171024/845/287/5239/11155/2318/88/57158/51676/844/91156/91977/1756/81493/27295/4660/6262/91624/3741/51778/9499/55800/6263/2316/10398/80206/10979/775/1410/70/148/4634/283807/6546/9457/84676/23022/1073/89/493/114907/342527/23363/26548/6331/825/6261/339855/667/11346/8470/1466/7273/6323/779/5142/219537/79933/6334/8572/84700/3753/3270/84033/58529/4703/26287/8850/1465/6521/859
GO:0001508	BP	action potential	137	0.590852	1.75973	1e-10	8.62333e-09	6.40585e-09	3529	tags=49%, list=19%, signal=40%	6332/1268/477/3745/287/6327/29119/3736/54112/6869/11280/1269/9472/1756/6330/6543/6262/3741/3737/4915/783/55800/2316/6328/8912/775/6508/8506/148/781/6326/9096/23704/6546/2898/2258/2852/3757/10052/5023/3762/3751/8913/6335/948/6331/1812/6329/1141/3752/1143/10021/3764/10242/6323/8911/149461/9630/6324/57369/857/6334/2697/27094/3753/81033/2702
GO:0045211	CC	postsynaptic membrane	271	0.5718	1.75246	1e-10	8.62333e-09	6.40585e-09	4867	tags=62%, list=26%, signal=46%	22866/4593/1129/3745/1272/2045/287/4916/3778/22871/3736/3356/22865/2901/6900/401190/2890/729993/2903/347730/23345/1756/1136/57689/145581/22986/27092/386617/2899/1740/57537/2558/1008/53826/57502/3738/2894/9890/2743/491/2066/8787/775/2567/8082/57692/148/399694/50944/57451/1000/79953/6546/2898/2891/1607/869/54413/1630/2043/2566/57528/2550/5802/5023/388336/3750/8001/11141/3751/8828/440073/3690/8973/5…
GO:0030018	CC	Z disc	127	0.586623	1.74332	1e-10	8.62333e-09	6.40585e-09	3949	tags=50%, list=21%, signal=40%	1674/171024/845/287/5239/11155/2318/88/57158/51676/844/91156/91977/1756/81493/27295/4660/6262/91624/3741/51778/9499/55800/6263/2316/10398/80206/775/1410/148/283807/6546/9457/84676/23022/1073/89/493/114907/23363/26548/6331/825/6261/339855/667/11346/8470/1466/7273/6323/5142/79933/6334/8572/84700/3753/3270/84033/58529/4703/1465/6521/859
GO:0005178	MF	integrin binding	155	0.577899	1.73558	1e-10	8.62333e-09	6.40585e-09	4185	tags=54%, list=22%, signal=42%	7060/3479/2674/6423/5803/7148/88/9358/1285/11095/1311/2192/63923/2247/2208/8745/8516/58494/8839/3680/10516/2200/10979/3679/60437/1903/1842/83700/7057/6387/3481/5764/4856/89/11117/26548/3690/7412/2191/2335/8515/959/3676/10457/3683/53616/1281/7402/57126/10666/667/3672/8840/10085/8174/120425/22801/1490/1307/3684/3681/7448/6376/8425/7450/11096/3936/2670/3687/3689/2246/85329/1289/4185/3385/3674/8613/3…
GO:0097060	CC	synaptic membrane	371	0.559411	1.7286	1e-10	8.62333e-09	6.40585e-09	5072	tags=60%, list=27%, signal=44%	1268/57863/22866/4593/1129/3745/1272/2045/287/9892/4916/3778/22871/22999/3736/3356/22865/9378/2901/6900/401190/2890/729993/2903/347730/22854/2823/23345/1756/8745/1136/57689/145581/22986/27092/6616/8516/386617/2899/440279/1740/57537/2558/1008/3737/53826/57502/3738/2894/5789/9890/140730/2743/491/2066/8787/775/23208/2567/9162/8082/1410/8506/57692/148/399694/50944/6326/57451/1000/5138/79953/6546/2898…
GO:0034702	CC	ion channel complex	291	0.558693	1.71607	1e-10	8.62333e-09	6.40585e-09	4867	tags=59%, list=26%, signal=45%	6332/845/3745/3778/6327/3736/2901/2890/3776/729993/10060/2903/11280/1804/30820/9472/56479/57628/6330/1136/3788/27092/1261/3779/2899/785/2558/6262/3741/3737/7220/783/3738/3755/55800/6263/286097/6328/2743/774/375567/8912/775/2567/777/781/6326/285175/2898/170850/2891/219527/3757/55799/3739/2566/7223/388336/3762/3750/8001/1188/3751/8973/8913/1193/6335/1258/2900/6331/5311/2564/3746/6329/3787/94015/379…
GO:0042391	BP	regulation of membrane potential	412	0.551378	1.70585	1e-10	8.62333e-09	6.40585e-09	5138	tags=54%, list=28%, signal=40%	6332/1268/477/845/3745/4653/287/5350/3778/6327/22871/5649/29119/22999/88/8115/3736/54112/9378/2901/401190/2273/2890/3776/6869/2903/11280/1269/259232/120892/9472/1756/11149/482/6330/1136/22953/152404/6543/151647/2899/340273/2558/3777/6262/388135/3741/3737/266743/4915/783/57502/5348/2894/64091/55800/2316/6328/140730/2743/124925/8912/4137/775/2567/23111/6508/8506/1634/6547/4208/148/781/50944/6326/90…
GO:0022836	MF	gated channel activity	335	0.551773	1.6989	1e-10	8.62333e-09	6.40585e-09	5107	tags=61%, list=27%, signal=45%	6332/1268/3745/3778/6327/3736/2901/2890/3776/343450/10060/2903/11280/259232/30820/203859/56479/6330/1136/22953/3788/27092/6616/1261/3779/2899/785/2558/3777/6262/3741/3737/783/3738/2894/3755/55800/6263/6328/80036/2743/774/8912/775/2567/777/781/6326/23704/3782/3708/2898/170850/2891/219527/3757/55799/3739/2566/5023/342125/3762/3750/8001/63895/1188/3751/8973/8913/1193/6335/1258/2900/6331/5311/2564/37…
GO:0007204	BP	positive regulation of cytosolic calcium ion concentration	314	0.552442	1.69874	1e-10	8.62333e-09	6.40585e-09	5555	tags=60%, list=30%, signal=43%	1268/477/845/931/111/287/5350/79608/185/116/6363/3356/57158/117/4842/6863/844/6869/2903/5733/6366/643/2247/2840/9472/1756/22953/5737/6543/6262/5731/2099/2587/7220/2740/783/84636/6263/10800/774/5587/775/930/6547/10563/777/27334/5294/148/781/1233/1903/57338/84502/1236/2843/3708/2829/6546/5788/286530/2852/1524/887/1909/5156/729230/5023/123041/493/552/952/255061/6622/1901/1193/948/1812/825/2151/183/3…
GO:0022843	MF	voltage-gated cation channel activity	141	0.567088	1.6918	1e-10	8.62333e-09	6.40585e-09	4724	tags=63%, list=25%, signal=47%	1268/3745/3778/3736/3776/343450/10060/2903/56479/3788/27092/6616/785/3777/3741/3737/783/3738/3755/774/8912/775/777/781/23704/3782/170850/219527/3757/55799/3739/3762/3750/3751/8913/5311/3746/3787/3790/6261/9256/3768/23416/3752/10021/27133/9312/3764/3780/6833/786/3773/84329/23413/8911/57582/59284/59285/779/3763/3769/773/3756/9132/23415/117532/126755/7442/3753/7881/4988/81033/9254/30819/3754/116443/…
GO:0008016	BP	regulation of heart contraction	199	0.554467	1.67924	1e-10	8.62333e-09	6.40585e-09	5413	tags=57%, list=29%, signal=41%	1674/477/845/1129/27129/287/5350/6327/29119/4842/10060/1756/11149/482/6330/6543/6262/3741/7220/2740/783/5348/64091/55800/10659/2316/491/8912/775/6508/6547/5294/148/781/9096/4634/23704/10371/84525/6546/2258/5999/3757/55328/1909/1113/10052/57731/10699/492/493/3762/552/80763/8913/1193/7068/6331/183/1813/2946/6910/7042/3768/3752/10021/8654/3670/1910/30845/146/1490/5142/5997/6324/1760/857/186/2697/100…
GO:0006936	BP	muscle contraction	336	0.545181	1.67874	1e-10	8.62333e-09	6.40585e-09	4745	tags=51%, list=26%, signal=39%	1674/6332/4629/477/845/1129/287/5350/3778/23336/6327/25802/1264/2775/29119/88/3736/93649/3356/1311/1837/4842/4638/6442/844/6869/5733/2982/1756/6330/1136/7111/6444/22953/6865/7140/3815/4660/6262/3741/3363/9499/783/5348/800/55800/2316/10398/59/8912/775/8082/1410/5592/6547/23676/8736/5294/322/148/781/4606/4634/10316/23704/6546/2258/2852/8735/3757/1909/1113/154/10052/23213/84676/5023/89/493/3762/952/…
GO:0043204	CC	perikaryon	152	0.558823	1.67558	1e-10	8.62333e-09	6.40585e-09	4859	tags=55%, list=26%, signal=41%	3745/460/7432/4804/1501/116/3736/2901/55273/5179/401190/1269/5126/120892/2596/60482/79739/6543/8516/1261/3798/2899/1740/57537/3737/2316/4131/775/23208/1410/6547/5122/4692/1393/2898/5630/5957/1996/4852/2043/729230/1821/5802/246213/8001/3751/5152/10439/1813/146760/11346/3672/23426/9312/1400/57165/7732/346288/6324/57463/57282/85397/113451/3756/5414/85442/5798/4988/58157/5066/10814/3748/123591/2741/6…
GO:0043235	CC	receptor complex	404	0.540726	1.67317	1e-10	8.62333e-09	6.40585e-09	5267	tags=58%, list=28%, signal=43%	1380/4593/2045/5354/26050/4916/22871/2674/9358/3356/2901/117/91584/2890/729993/2903/2042/285220/2690/1136/4921/22953/81793/27092/4920/8516/386617/2899/155/2676/3815/2558/374462/2322/7220/3680/4915/53353/2675/10077/3977/9971/375567/51284/2066/3679/2567/5745/238/973/5979/3568/2843/974/64109/2898/388325/658/9244/3953/83416/7018/2891/84171/5156/4547/2043/154/151306/7049/2566/2260/57528/2550/4881/1111…
GO:0051480	BP	regulation of cytosolic calcium ion concentration	345	0.542341	1.67101	1e-10	8.62333e-09	6.40585e-09	5555	tags=59%, list=30%, signal=42%	1268/477/845/931/111/287/5350/79608/185/116/6363/3356/57158/117/4842/2890/6863/844/6869/2903/5733/6366/643/2247/2840/9472/1756/22953/5737/6543/3777/6262/5731/2099/3741/2587/7220/2740/783/84636/6263/10800/774/491/5587/10590/775/64072/930/6547/10563/777/27334/5294/148/781/1233/1903/57338/84502/1236/2843/3708/2829/6546/5788/286530/2852/1524/887/1909/5156/729230/7223/492/5023/123041/493/552/952/25506…
GO:0005244	MF	voltage-gated ion channel activity	197	0.551415	1.67033	1e-10	8.62333e-09	6.40585e-09	5768	tags=66%, list=31%, signal=46%	6332/1268/3745/3778/6327/3736/3776/343450/10060/2903/11280/259232/30820/56479/6330/3788/27092/6616/785/3777/3741/3737/783/3738/3755/55800/6328/774/8912/775/777/781/6326/23704/3782/170850/219527/3757/55799/3739/3762/3750/1188/3751/8913/1193/6335/6331/5311/3746/6329/3787/3790/6261/9256/3768/23416/25932/3752/10021/27133/9312/3764/3780/6833/786/3773/84329/23413/6323/8911/57582/59284/59285/779/3763/15…
GO:0022832	MF	voltage-gated channel activity	197	0.551415	1.67033	1e-10	8.62333e-09	6.40585e-09	5768	tags=66%, list=31%, signal=46%	6332/1268/3745/3778/6327/3736/3776/343450/10060/2903/11280/259232/30820/56479/6330/3788/27092/6616/785/3777/3741/3737/783/3738/3755/55800/6328/774/8912/775/777/781/6326/23704/3782/170850/219527/3757/55799/3739/3762/3750/1188/3751/8913/1193/6335/6331/5311/3746/6329/3787/3790/6261/9256/3768/23416/25932/3752/10021/27133/9312/3764/3780/6833/786/3773/84329/23413/6323/8911/57582/59284/59285/779/3763/15…
GO:1903522	BP	regulation of blood circulation	247	0.545883	1.66669	1e-10	8.62333e-09	6.40585e-09	4894	tags=54%, list=26%, signal=40%	1674/477/845/1129/27129/287/5350/185/6327/29119/3356/4842/10060/6869/1756/11149/482/6330/6543/6262/3741/7220/2740/783/5348/64091/55800/10659/10800/2316/491/8912/775/554/6508/6547/5294/148/781/9096/4634/23704/10371/84525/6546/2258/5999/3757/55328/1909/1113/10052/57731/10699/492/5023/493/3762/552/342527/952/80763/8913/1193/7068/6331/183/1813/2946/5021/6910/7042/3768/3752/1621/10021/8654/4313/3274/3…
GO:1902495	CC	transmembrane transporter complex	363	0.537857	1.66036	1e-10	8.62333e-09	6.40585e-09	4867	tags=50%, list=26%, signal=37%	6332/477/845/3745/5350/3778/6327/3736/2901/2890/3776/729993/10060/2903/11280/1804/30820/9472/56479/57628/482/6330/1136/3788/27092/1261/3779/2899/785/2558/6262/3741/3737/7220/783/5348/3738/3755/55800/6263/286097/6328/2743/774/375567/8912/775/2567/777/781/6326/480/285175/2898/170850/2891/219527/3757/55799/3739/2566/7223/388336/3762/3750/8001/1188/3751/8973/8913/1193/6335/1258/2900/6331/5311/2564/37…
GO:0009897	CC	external side of plasma membrane	368	0.533677	1.64823	1e-10	8.62333e-09	6.40585e-09	5895	tags=64%, list=32%, signal=45%	931/460/22871/2674/286133/6403/388512/933/643/4684/2208/165530/482/2690/2206/8516/23627/2676/3815/10462/3680/6517/5169/2675/3977/911/913/3679/4063/6508/80274/930/5243/1233/973/115650/338328/1236/3568/974/2829/64109/7057/5788/6387/9244/3953/7018/1524/2891/55068/361/9936/3554/5156/57493/50489/7049/729230/5023/84168/940/2044/912/22914/114836/969/7412/9173/8029/29121/8515/1901/959/8832/948/343413/367…
GO:0005539	MF	glycosaminoglycan binding	230	0.540893	1.6479	1e-10	8.62333e-09	6.40585e-09	3850	tags=47%, list=21%, signal=37%	7060/64388/6422/5549/9353/84870/284654/340419/7148/2255/151887/2252/1511/11095/1311/338/6403/10178/64094/2247/1809/6586/26032/8839/1991/84570/2200/4057/79625/1634/26279/10563/3075/4053/149998/1842/5212/4753/7057/5788/6585/9510/83716/143903/6649/7058/23213/7049/5764/2260/5802/9508/4856/8828/50939/2335/11167/10457/1462/5270/10894/55576/2254/51816/146760/6402/6368/3512/3730/50859/8292/7123/8840/2657…
GO:0060402	BP	calcium ion transport into cytosol	163	0.546996	1.6467	1e-10	8.62333e-09	6.40585e-09	3868	tags=48%, list=21%, signal=38%	477/845/931/287/5350/6363/3356/57158/117/4842/844/2903/6366/2247/9472/1756/22953/6543/6262/7220/6263/774/5587/775/930/6547/777/148/781/57338/84502/1236/3708/2829/6546/5788/2852/5023/123041/493/6622/1193/1812/825/5311/3357/596/2814/1813/2946/6261/5336/7222/1234/5027/2149/2811/779/6376/55283/187/773/857/5026/9002/799/7442/3270/9001/10268/3709/4283/255231/55503/623/27112/5144/2534
GO:1990351	CC	transporter complex	385	0.532323	1.64618	1e-10	8.62333e-09	6.40585e-09	4867	tags=48%, list=26%, signal=36%	6332/477/845/3745/5350/3778/6327/3736/2901/2890/3776/729993/10060/2903/11280/1804/30820/9472/56479/57628/482/6330/1136/3788/27092/1261/3779/2899/785/2558/6262/3741/3737/7220/783/5348/57198/3738/3755/55800/6263/286097/6328/2743/774/375567/8912/775/2567/777/781/6326/480/285175/2898/170850/2891/219527/3757/55799/3739/2566/7223/388336/3762/3750/8001/1188/3751/8973/8913/1193/6335/1258/2900/6331/79895/…
GO:0060047	BP	heart contraction	235	0.539311	1.64466	1e-10	8.62333e-09	6.40585e-09	4894	tags=51%, list=26%, signal=38%	1674/477/845/1129/27129/287/5350/6327/29119/4842/10060/1756/11149/482/6330/6444/6543/6262/3741/7220/2740/783/5348/64091/55800/10659/2316/491/8912/775/6508/6547/70/6445/5294/148/781/9096/4634/23704/10371/84525/6546/2258/5999/3757/55328/1909/1113/10052/57731/10699/492/493/3762/552/80763/8913/1193/7068/6331/183/1813/2946/6910/7042/3768/3752/10021/3764/8654/3670/1910/30845/7273/6323/146/1490/5142/599…
GO:0007188	BP	adenylate cyclase-modulating G protein-coupled receptor signaling pathway	239	0.536052	1.63453	1e-10	8.62333e-09	6.40585e-09	4907	tags=57%, list=26%, signal=42%	1268/1129/111/7432/5350/7434/116/4886/2775/283383/117/577/9340/5733/1269/108/5737/64805/4883/2899/155/9590/5731/2587/2740/5064/2316/554/148/5745/2774/1903/2849/23284/5138/575/2852/4161/6344/1909/2916/1113/154/23266/2550/9699/493/1395/1816/5567/1901/1812/2913/3973/1813/4158/5744/4987/1902/1133/9568/2781/2695/10149/10203/5028/5996/23566/19/3355/146/576/54331/23432/7253/2641/5142/9630/5997/27201/847…
GO:0003015	BP	heart process	244	0.53526	1.63344	1e-10	8.62333e-09	6.40585e-09	4894	tags=50%, list=26%, signal=38%	1674/477/845/1129/27129/287/5350/6327/29119/4842/10060/1756/11149/482/6330/6444/6543/6262/3741/7220/2740/783/5348/64091/55800/10659/2316/491/8912/775/6508/6547/70/6445/5294/148/781/9096/4634/23704/10371/84525/6546/2258/25937/5999/3757/55328/1909/1113/10052/57731/10699/492/493/3762/552/80763/8913/1193/7068/6331/183/1813/2946/6910/7042/3768/3752/10021/3764/8654/3670/1910/30845/7273/6323/146/1490/51…
GO:0030017	CC	sarcomere	208	0.536245	1.6268	1e-10	8.62333e-09	6.40585e-09	4021	tags=45%, list=22%, signal=36%	1674/171024/845/287/25802/5239/11155/2318/88/57158/51676/844/10060/91156/91977/23345/1756/81493/7111/202333/27295/7140/4660/6262/91624/3741/115557/51778/9499/55800/6263/2316/10398/80206/10979/775/1410/70/23676/8736/148/4634/283807/6546/9457/84676/23022/1073/89/493/114907/342527/23363/26548/10324/137735/6331/825/29767/56203/6261/339855/667/11346/8470/1466/4313/4620/7169/4626/7273/6323/4619/779/514…
GO:0050808	BP	synapse organization	414	0.525148	1.62553	1e-10	8.62333e-09	6.40585e-09	5939	tags=58%, list=32%, signal=41%	22866/4593/2045/26050/1501/4916/22871/5649/4884/22865/9378/577/57633/6900/119/55203/4747/23768/257194/23114/347730/91156/22854/7143/9379/2823/120892/158866/26167/2596/8404/57689/22953/145581/6543/547/3897/5063/139065/440279/9423/785/9723/9118/266743/84623/4915/8499/5064/1287/718/10810/9499/783/57502/5789/10082/56131/2316/27445/2743/124925/4131/4137/2066/8506/6547/23024/4208/50944/83992/4744/8128/…
GO:0050804	BP	modulation of chemical synaptic transmission	410	0.523694	1.62023	1e-10	8.62333e-09	6.40585e-09	4778	tags=51%, list=26%, signal=39%	1268/477/3745/22871/5649/4884/22999/3356/9378/2901/9211/6900/2890/590/23349/729993/6869/2903/347730/1269/22854/7143/120892/3908/1136/57689/152404/22986/5579/6543/27092/4920/6865/6616/2899/440279/57537/152330/3815/6860/11170/9590/23467/266743/4915/783/57502/5577/2894/5789/9890/8224/140730/4130/9228/774/9370/9145/4131/4137/10590/23208/9162/6547/4208/148/50944/57338/84502/10718/5334/1000/2898/575/23…
GO:0099177	BP	regulation of trans-synaptic signaling	411	0.523485	1.61997	1e-10	8.62333e-09	6.40585e-09	4778	tags=51%, list=26%, signal=39%	1268/477/3745/22871/5649/4884/22999/3356/9378/2901/9211/6900/2890/590/23349/729993/6869/2903/347730/1269/22854/7143/120892/3908/1136/57689/152404/22986/5579/6543/27092/4920/6865/6616/2899/440279/57537/152330/3815/6860/11170/9590/23467/266743/4915/783/57502/5577/2894/5789/9890/8224/140730/4130/9228/774/9370/9145/4131/4137/10590/23208/9162/6547/4208/148/50944/57338/84502/10718/5334/1000/2898/575/23…
GO:0005261	MF	cation channel activity	336	0.525548	1.61828	1e-10	8.62333e-09	6.40585e-09	5768	tags=60%, list=31%, signal=42%	6332/1268/3745/3778/6327/3736/2901/2890/3776/343450/10060/2903/11280/259232/2823/30820/56479/6330/1136/22953/3788/27092/6616/1261/3779/2899/785/3777/6262/3741/3737/7220/783/57419/3738/140803/3755/55800/6263/6328/80036/774/8912/775/777/781/6326/23704/3782/114780/3708/285175/2898/170850/2891/219527/3757/55799/3739/7223/5023/123041/3762/3750/63895/3751/8973/8913/6335/1258/2900/6331/5311/3746/6329/37…
GO:0030016	CC	myofibril	226	0.531182	1.61772	1e-10	8.62333e-09	6.40585e-09	4165	tags=45%, list=22%, signal=35%	1674/171024/845/287/23336/25802/5239/11155/2318/88/57158/51676/844/10060/91156/91977/23345/1756/81493/7111/202333/27295/7140/4660/6262/91624/3741/115557/51778/9499/800/55800/6263/2316/10398/80206/10979/775/1410/70/23676/8736/148/4634/6840/283807/6546/9457/8735/84676/23022/1073/89/493/114907/342527/23363/26548/10324/137735/6331/825/29767/56203/6261/339855/667/11346/8470/3764/1466/4313/4620/7169/46…
GO:0060401	BP	cytosolic calcium ion transport	182	0.534655	1.61399	1e-10	8.62333e-09	6.40585e-09	3868	tags=45%, list=21%, signal=36%	477/845/931/287/5350/6363/3356/57158/117/4842/844/2903/6366/2247/9472/1756/22953/6543/6262/7220/6263/286097/774/5587/775/930/6547/777/148/781/57338/84502/1236/3708/2829/6546/5788/2852/492/5023/123041/493/6622/1193/1812/825/5311/3357/596/2814/1813/2946/6261/5336/7222/1234/5027/2149/1490/2811/779/6376/55283/187/773/857/5026/9002/799/7442/3270/9001/10268/3709/4283/255231/55503/623/27112/5144/2534
GO:0043292	CC	contractile fiber	236	0.527474	1.60874	1e-10	8.62333e-09	6.40585e-09	4165	tags=44%, list=22%, signal=35%	1674/4629/171024/845/287/23336/25802/5239/11155/2318/88/57158/51676/844/10060/91156/91977/23345/1756/81493/7111/202333/27295/7140/4660/6262/91624/3741/115557/51778/9499/800/55800/6263/2316/10398/59/80206/10979/775/1410/70/23676/8736/148/4634/6840/283807/6546/9457/8735/84676/23022/1073/89/493/114907/342527/23363/26548/10324/137735/6331/825/29767/56203/6261/339855/667/11346/8470/3764/1466/4313/4620…
GO:0005216	MF	ion channel activity	433	0.518427	1.60754	1e-10	8.62333e-09	6.40585e-09	5768	tags=58%, list=31%, signal=41%	6332/1268/3745/3778/6327/3736/2901/2890/3776/343450/10060/2903/11280/259232/2823/30820/203859/56479/6330/1136/22953/3788/27092/6616/1261/3779/2899/785/2558/3777/6262/3741/3737/7220/783/5348/57419/3738/2894/140803/3755/55800/6263/6328/80036/2743/774/8912/775/2567/777/781/6326/23704/3782/114780/3708/285175/2898/170850/2891/219527/3757/55799/3739/10052/2566/7223/5023/123041/342125/3762/3750/8001/638…
GO:0003012	BP	muscle system process	417	0.519126	1.60694	1e-10	8.62333e-09	6.40585e-09	4781	tags=48%, list=26%, signal=37%	1674/6332/4629/477/9464/845/1129/4653/221476/287/5350/3778/3479/23336/6327/25802/1264/2775/29119/88/3736/93649/3356/1311/1837/4842/4638/6442/844/6869/5733/2982/9472/1756/6330/1136/7111/6444/22953/6865/7140/3815/4660/6262/3741/51778/3363/9499/783/5348/800/55800/3488/2316/10398/59/8912/775/8082/1410/5592/6547/23676/8736/5294/322/148/781/4606/4634/10316/23704/6546/2258/5999/2852/8735/3757/1909/1113/…
GO:0008015	BP	blood circulation	492	0.515737	1.60575	1e-10	8.62333e-09	6.40585e-09	4907	tags=50%, list=26%, signal=38%	1674/1268/477/845/1129/27129/9353/287/5350/3778/185/6327/4886/29119/3356/1285/1511/4223/1311/4842/10060/6869/367/2006/2982/9607/1756/5139/11149/482/6330/6444/22953/6543/4883/6865/3779/155/1215/6262/1359/9590/3741/7220/2740/3363/196740/783/5348/64091/55800/10659/10800/2316/59/491/9370/8912/10979/284/775/554/6508/5592/6547/9365/70/6445/5294/10391/148/781/2983/9096/4634/23704/654/10371/84525/5138/65…
GO:0006874	BP	cellular calcium ion homeostasis	445	0.515337	1.59915	1e-10	8.62333e-09	6.40585e-09	4631	tags=47%, list=25%, signal=36%	1268/477/845/931/111/287/5350/79608/185/116/6363/3356/57158/117/4842/2890/6863/844/6869/2903/5733/6366/643/2247/2840/9472/1756/22953/5737/5579/6543/284612/3777/6262/5731/2099/3741/2587/7220/2740/1991/6358/783/57419/84636/6263/286097/10800/774/491/5587/10590/775/64072/930/6547/10563/777/27334/5294/148/781/5745/1233/1903/57338/84502/1236/2843/3708/2829/6546/2898/5788/286530/6387/2852/1524/887/1909/…
GO:0055074	BP	calcium ion homeostasis	457	0.510774	1.58585	1e-10	8.62333e-09	6.40585e-09	5339	tags=51%, list=29%, signal=37%	1268/477/845/931/111/287/5350/79608/185/116/6363/3356/57158/117/4842/2890/6863/844/6869/2903/5733/6366/643/2247/2840/9472/1756/6444/22953/5737/5579/6543/284612/3777/6262/5731/2099/3741/2587/7220/2740/1991/6358/783/57419/84636/6263/286097/10800/774/491/5587/10590/775/64072/930/6547/10563/9365/777/27334/5294/148/781/5745/1233/1903/57338/84502/1236/2843/3708/2829/6546/2898/5788/286530/6387/2852/1524…
GO:1901681	MF	sulfur compound binding	263	0.516044	1.57937	1e-10	8.62333e-09	6.40585e-09	4236	tags=42%, list=23%, signal=33%	7060/64388/6422/5549/9353/84870/284654/340419/7148/2255/151887/2252/1511/11095/1311/338/6403/10178/64094/2247/1809/6586/8839/6262/60495/1991/84570/2200/4057/79625/26279/10563/3075/4053/149998/1842/4753/7057/5788/6585/9510/83716/6649/7058/7049/5764/2260/5802/9508/4856/5023/33/8435/8828/50939/2335/11167/55753/10457/5270/2254/51816/6822/32/146760/2946/6402/8277/6368/3730/8292/7123/8840/26577/5104/57…
GO:0097485	BP	neuron projection guidance	235	0.517661	1.57864	1e-10	8.62333e-09	6.40585e-09	4971	tags=51%, list=27%, signal=38%	1272/2045/4804/9353/5649/91653/9369/9378/91584/9211/6900/23768/223117/23114/2042/57453/56896/7143/4684/151449/3908/494470/285220/2596/6586/3897/3798/9423/152330/2676/9723/91624/2737/115557/9499/10752/4917/5979/9241/10371/6387/658/6585/128434/1909/1630/2043/80031/6608/23022/2736/3800/10154/56920/2044/8828/3199/4914/5797/9638/6091/64843/6092/8633/1959/137970/3730/57556/10500/8941/1400/3670/1826/266…
GO:0007411	BP	axon guidance	234	0.516463	1.57449	1e-10	8.62333e-09	6.40585e-09	4971	tags=51%, list=27%, signal=38%	1272/2045/4804/9353/5649/91653/9369/9378/91584/9211/6900/23768/223117/23114/2042/57453/56896/7143/4684/151449/3908/494470/285220/2596/6586/3897/3798/9423/152330/2676/9723/91624/2737/115557/9499/10752/4917/5979/9241/10371/6387/658/6585/128434/1909/1630/2043/80031/6608/23022/2736/3800/10154/56920/2044/8828/3199/4914/5797/9638/6091/64843/6092/8633/1959/137970/3730/57556/10500/8941/1400/3670/1826/266…
GO:0098978	CC	glutamatergic synapse	319	0.510983	1.57156	1e-10	8.62333e-09	6.40585e-09	3512	tags=39%, list=19%, signal=33%	1268/22866/2045/4916/22871/4884/3736/3356/2901/9211/401190/2890/729993/2903/22854/7143/2982/2823/120892/8404/8745/57689/145581/22986/27092/5063/6616/139065/2899/1008/6860/23467/53826/10810/57502/3738/5577/2894/5789/9890/8224/27445/9228/491/2066/8787/70/148/2983/50944/83992/6326/10718/814/23284/2898/84631/869/54413/1996/6506/2043/2566/1009/1821/2550/9229/492/6456/5023/493/388336/11141/6857/3751/88…
GO:0006813	BP	potassium ion transport	231	0.515442	1.57072	1e-10	8.62333e-09	6.40585e-09	5724	tags=57%, list=31%, signal=40%	477/845/3745/7432/287/3778/88/3736/3356/4842/2273/3776/343450/10060/1804/259232/30820/9472/56479/57628/482/3788/6616/3779/3777/3741/3737/5348/57419/3738/3755/2316/65267/285195/23704/3782/480/5999/170850/219527/3757/6559/3739/123041/3762/3750/3751/6000/1812/5311/6557/3746/1813/3787/3790/486/3768/23416/3752/10021/27133/9312/3764/3780/6833/3773/10242/57582/3792/3763/3769/57463/358/3756/9132/857/3081…
GO:0034765	BP	regulation of ion transmembrane transport	452	0.505008	1.5679	1e-10	8.62333e-09	6.40585e-09	5768	tags=55%, list=31%, signal=39%	6332/477/845/3745/5354/287/5350/3778/6327/22871/5649/88/3736/57158/4842/2273/2259/729993/844/11280/1804/259232/30820/9472/56479/57628/1756/482/6330/3788/27092/3779/785/6262/3737/7220/53826/783/5348/3738/644139/3755/55800/2316/6328/65267/774/8912/5587/775/930/777/5243/5294/4208/781/50944/6326/57338/84502/23704/1393/6546/2258/5999/2852/170850/219527/54413/3757/1909/55799/9104/154/3739/729230/6236/5…
GO:0043062	BP	extracellular structure organization	304	0.510224	1.56788	1e-10	8.62333e-09	6.40585e-09	5401	tags=53%, list=29%, signal=38%	4629/25890/1310/1545/6423/26585/83872/7148/57188/151887/1285/1511/7373/11095/1311/10218/2192/4239/1286/23768/64094/1295/7092/2006/22854/7143/4921/1805/8516/1288/89932/1215/60495/170692/1991/10516/1287/1296/2199/8434/79625/81794/90102/171019/1842/5212/2295/2294/11107/4316/9510/3036/84171/5156/83716/23213/165/9508/84168/4060/11117/79875/4325/50939/2191/131873/4868/256076/183/2824/7177/169044/54507/…
GO:0099572	CC	postsynaptic specialization	340	0.50901	1.56767	1e-10	8.62333e-09	6.40585e-09	3943	tags=43%, list=21%, signal=34%	22866/2045/4804/1501/22871/22865/2901/9201/56899/4842/401190/2890/119/729993/2903/347730/64506/158866/2596/1136/57689/152404/145581/22986/8777/6543/27092/5063/8516/1740/57537/2558/1008/388135/6695/4915/5064/57502/2894/9890/8224/27445/9228/491/4131/2066/8787/775/23208/10486/9162/1410/6547/50944/4744/3708/1000/79953/6546/2898/575/2852/4355/2891/5662/54413/1630/9863/2043/2566/55607/1821/5802/9229/38…
GO:0030198	BP	extracellular matrix organization	303	0.509398	1.56547	1e-10	8.62333e-09	6.40585e-09	5401	tags=52%, list=29%, signal=38%	4629/25890/1310/1545/6423/26585/83872/7148/57188/151887/1285/1511/7373/11095/1311/10218/2192/4239/1286/23768/64094/1295/7092/2006/22854/7143/4921/1805/8516/1288/89932/1215/60495/170692/1991/10516/1287/1296/2199/8434/79625/81794/90102/171019/1842/5212/2295/2294/11107/4316/9510/3036/84171/5156/83716/23213/165/9508/84168/4060/11117/79875/4325/50939/2191/131873/4868/256076/183/2824/7177/169044/54507/…
GO:0072503	BP	cellular divalent inorganic cation homeostasis	482	0.502741	1.56403	1e-10	8.62333e-09	6.40585e-09	5555	tags=50%, list=30%, signal=36%	1268/477/845/931/111/287/5350/79608/185/116/6363/3356/57158/117/4842/2890/6863/844/6869/2903/5733/6366/643/2247/2840/9472/1756/169026/22953/5737/5579/6543/284612/3777/6262/5731/2099/3741/2587/7220/2740/1991/6358/783/57419/84636/6263/286097/10800/774/491/5587/10590/775/64072/930/6547/10563/777/27334/5294/148/781/5745/1233/1903/57338/84502/1236/2843/3708/2829/6546/2898/5788/286530/6387/2852/1524/88…
GO:0014069	CC	postsynaptic density	317	0.508452	1.56396	1e-10	8.62333e-09	6.40585e-09	3560	tags=40%, list=19%, signal=33%	22866/2045/4804/1501/22871/22865/2901/9201/56899/4842/401190/2890/119/729993/2903/64506/158866/2596/1136/57689/152404/145581/22986/8777/6543/27092/5063/8516/1740/57537/388135/6695/4915/5064/57502/2894/9890/8224/27445/9228/491/4131/2066/8787/775/23208/10486/9162/1410/6547/50944/4744/3708/1000/79953/6546/2898/575/2852/4355/2891/5662/1630/9863/2043/55607/1821/5802/9229/388336/3750/3751/440073/8927/5…
GO:0098984	CC	neuron to neuron synapse	346	0.50653	1.56091	1e-10	8.62333e-09	6.40585e-09	3943	tags=42%, list=21%, signal=34%	22866/2045/4804/1501/22871/22865/2901/9201/5179/56899/4842/401190/2890/119/729993/2903/64506/158866/482/2596/1136/57689/152404/145581/22986/8777/6543/27092/5063/8516/1740/57537/388135/6695/4915/5064/57502/2894/5789/9890/8224/27445/9228/491/4131/2066/8787/775/23208/10486/9162/1410/6547/50944/4744/3708/1000/79953/6546/2898/575/143425/2852/4355/2891/5662/54413/1630/9863/2043/55607/1821/5802/9229/388…
GO:0045229	BP	external encapsulating structure organization	306	0.507172	1.55878	1e-10	8.62333e-09	6.40585e-09	5401	tags=52%, list=29%, signal=38%	4629/25890/1310/1545/6423/26585/83872/7148/57188/151887/1285/1511/7373/11095/1311/10218/2192/4239/1286/23768/64094/1295/7092/2006/22854/7143/4921/1805/8516/1288/89932/1215/60495/170692/1991/10516/1287/1296/2199/8434/79625/81794/90102/171019/1842/5212/2295/2294/11107/4316/9510/3036/84171/5156/388697/83716/23213/165/9508/84168/4060/11117/79875/4325/50939/2191/131873/4868/256076/183/2824/7177/169044…
GO:0003018	BP	vascular process in circulatory system	258	0.509106	1.5569	1e-10	8.62333e-09	6.40585e-09	5339	tags=53%, list=29%, signal=38%	477/9353/3778/185/3356/1311/4842/10060/6869/2982/5139/482/6543/4883/6865/3779/155/9590/3741/6542/6517/3363/196740/57419/10800/59/10979/284/554/6508/5592/5243/84889/148/9194/654/480/5138/6546/3953/2852/387700/1909/53919/6506/154/6649/6456/5023/4881/493/552/342527/1816/7010/952/948/1812/183/3357/257313/5021/1621/3672/3764/6567/91807/4313/3274/7122/6833/1910/2303/5028/2149/10242/6532/2837/146/3792/2…
GO:0022803	MF	passive transmembrane transporter activity	480	0.500494	1.55638	1e-10	8.62333e-09	6.40585e-09	5768	tags=55%, list=31%, signal=39%	6332/1268/3745/3778/6327/3736/2901/2890/3776/343450/10060/2903/11280/259232/2823/30820/203859/56479/6330/1136/22953/3788/27092/6616/1261/3779/2899/785/2558/3777/6262/3741/3737/7220/783/5348/57419/3738/2894/140803/3755/55800/6263/6328/80036/2743/774/8912/775/2567/777/781/6326/23704/3782/114780/3708/6563/285175/2898/170850/2891/219527/361/3757/55799/3739/10052/2566/7223/5023/123041/342125/3762/3750…
GO:1904062	BP	regulation of cation transmembrane transport	330	0.505588	1.5563	1e-10	8.62333e-09	6.40585e-09	5610	tags=52%, list=30%, signal=37%	477/845/5354/287/5350/6327/22871/5649/88/3736/57158/4842/2273/2259/729993/844/1804/30820/9472/57628/1756/482/6330/3788/27092/3779/785/6262/7220/53826/783/5348/644139/3755/55800/2316/65267/5587/775/930/5294/4208/781/50944/57338/84502/23704/1393/6546/2258/5999/2852/219527/54413/3757/1909/9104/154/729230/6236/5023/493/388336/2669/6622/1193/6000/6331/1812/825/183/5311/3746/1813/3787/2946/486/4987/740…
GO:0032279	CC	asymmetric synapse	322	0.505471	1.55449	1e-10	8.62333e-09	6.40585e-09	3943	tags=42%, list=21%, signal=34%	22866/2045/4804/1501/22871/22865/2901/9201/56899/4842/401190/2890/119/729993/2903/64506/158866/2596/1136/57689/152404/145581/22986/8777/6543/27092/5063/8516/1740/57537/388135/6695/4915/5064/57502/2894/9890/8224/27445/9228/491/4131/2066/8787/775/23208/10486/9162/1410/6547/50944/4744/3708/1000/79953/6546/2898/575/2852/4355/2891/5662/54413/1630/9863/2043/55607/1821/5802/9229/388336/3750/3751/440073/…
GO:0015267	MF	channel activity	479	0.499923	1.55433	1e-10	8.62333e-09	6.40585e-09	5768	tags=55%, list=31%, signal=39%	6332/1268/3745/3778/6327/3736/2901/2890/3776/343450/10060/2903/11280/259232/2823/30820/203859/56479/6330/1136/22953/3788/27092/6616/1261/3779/2899/785/2558/3777/6262/3741/3737/7220/783/5348/57419/3738/2894/140803/3755/55800/6263/6328/80036/2743/774/8912/775/2567/777/781/6326/23704/3782/114780/3708/6563/285175/2898/170850/2891/219527/361/3757/55799/3739/10052/2566/7223/5023/123041/342125/3762/3750…
GO:0043025	CC	neuronal cell body	478	0.498477	1.54985	1e-10	8.62333e-09	6.40585e-09	4869	tags=46%, list=26%, signal=35%	477/22866/3745/460/2045/7432/4804/1501/79608/2674/116/11075/3736/347/3356/5563/57565/9378/2901/55273/338/5179/6900/401190/2890/3776/933/6863/257194/1269/63923/5126/56896/2823/120892/339479/2690/2596/1136/60482/22953/79739/6750/6543/4920/3897/8516/1261/3798/2899/1740/57537/5136/2558/6860/9590/3737/9499/5577/720/2316/4130/124925/774/491/4131/4137/775/23208/1620/1410/6547/5122/777/4692/85458/1233/51…
GO:0019932	BP	second-messenger-mediated signaling	298	0.502657	1.54425	1e-10	8.62333e-09	6.40585e-09	5367	tags=51%, list=29%, signal=37%	477/845/287/5350/185/3479/116/117/55273/6403/4842/933/844/2903/108/643/10335/2982/120892/9472/1756/5139/6444/22953/5737/64805/6543/27115/6262/2740/51778/10231/79625/4880/4137/775/10486/5592/1233/2983/10316/1236/3708/2829/5138/6546/7057/5788/1524/6344/695/9104/55607/729230/123041/89/4881/493/552/2044/50852/7412/1193/948/183/5152/3357/4776/2946/4987/5443/1237/2695/5336/6401/2977/8654/1234/79772/191…
GO:0010959	BP	regulation of metal ion transport	379	0.495754	1.53279	1e-10	8.62333e-09	6.40585e-09	5052	tags=48%, list=27%, signal=36%	477/845/1272/5354/7432/287/5350/6327/88/3736/3356/57158/117/4842/4638/2273/2259/844/1804/30820/9472/57628/1756/482/6330/22953/3788/115352/3779/785/6262/3741/7220/53826/783/5348/3755/55800/2316/65267/154215/5587/775/930/5294/781/57338/84502/23704/6546/6387/2258/5999/2852/3603/7018/219527/5957/3757/2916/9104/154/57731/6236/5023/493/2669/6622/1193/8832/6000/6331/1812/825/183/3718/5311/5270/3746/596/…
GO:0046873	MF	metal ion transmembrane transporter activity	423	0.491039	1.52118	1e-10	8.62333e-09	6.40585e-09	6813	tags=62%, list=37%, signal=40%	6332/1268/477/3745/3778/6327/3736/2901/3776/343450/10060/2903/11280/259232/55117/2823/30820/56479/169026/6330/60482/3788/6543/348938/27092/6616/3779/2899/785/3777/6262/3741/3737/7220/783/57030/57419/3738/140803/3755/55800/6263/6328/80036/774/491/285195/8912/775/6547/777/781/6326/23704/3782/114780/3708/480/6546/2898/170850/219527/3757/55799/6559/6506/3739/7223/492/123041/493/3762/3750/3751/8913/65…
GO:0061564	BP	axon development	474	0.485493	1.50932	1e-10	8.62333e-09	6.40585e-09	5257	tags=48%, list=28%, signal=35%	1268/1272/2045/5354/56963/4804/9353/26050/55118/5649/4884/5803/91653/9369/347/22865/9378/9201/91584/9211/6900/4747/23768/223117/23114/63923/2042/886/57453/56896/22854/4685/7143/4684/151449/3908/494470/285220/2596/57689/4135/6586/3897/5063/57611/139065/3798/10100/9423/152330/2676/9723/91624/2737/115557/140578/4915/9499/9890/2316/4130/8153/4131/4137/23111/8506/10752/4692/85458/322/4825/4917/5979/47…
GO:0006816	BP	calcium ion transport	409	0.486259	1.50434	1e-10	8.62333e-09	6.40585e-09	4734	tags=45%, list=25%, signal=35%	477/845/931/5354/287/5350/6363/3356/57158/117/4842/4638/844/2903/6366/259232/2247/2823/9472/1756/22953/5579/6543/27092/115352/785/6262/7220/783/57419/140803/6263/286097/10800/65267/80036/774/491/8912/5587/775/64072/930/6547/777/5294/148/781/57338/10316/84502/1236/114780/3708/2829/6546/5788/6387/5999/2852/3603/5957/1909/55799/2916/9104/6236/7223/492/5023/123041/493/2669/8913/6622/1193/8832/1812/82…
GO:0007409	BP	axonogenesis	430	0.485072	1.50388	1e-10	8.62333e-09	6.40585e-09	5012	tags=47%, list=27%, signal=35%	1272/2045/4804/9353/26050/5649/4884/5803/91653/9369/22865/9378/9201/91584/9211/6900/4747/23768/223117/23114/63923/2042/886/57453/56896/22854/7143/4684/151449/3908/494470/285220/2596/57689/4135/6586/3897/5063/57611/139065/3798/9423/152330/2676/9723/91624/2737/115557/140578/4915/9499/9890/4130/8153/4131/4137/23111/8506/10752/4692/85458/322/4825/4917/5979/4744/7345/9241/10371/1000/575/4133/6387/658/…
GO:0098793	CC	presynapse	488	0.482544	1.50185	1e-10	8.62333e-09	6.40585e-09	4337	tags=42%, list=23%, signal=33%	1268/57863/1272/9892/22871/22999/3736/3356/9378/2901/5179/401190/2890/4747/3776/2903/63923/115827/22854/11037/9899/9379/2823/120892/8745/5579/6543/6616/386617/2899/440279/284612/2558/6572/1008/6860/3737/114088/84623/4915/8499/53826/6517/783/57502/57030/3738/5789/8224/27445/140730/491/9145/10590/2066/23208/9162/8506/85300/6547/5122/273/85458/148/2983/5368/83992/6326/148281/1393/1000/5138/79953/654…
GO:0034329	BP	cell junction assembly	413	0.483279	1.49545	1e-10	8.62333e-09	6.40585e-09	5890	tags=52%, list=32%, signal=36%	6422/4593/4653/2045/28513/287/26050/1501/4916/22871/4884/26585/88/347/22865/9378/577/57633/119/55203/23768/257194/347730/91156/2042/10580/9379/2823/26167/2596/145581/8777/139065/9423/1008/11170/266743/84623/4915/5010/57502/5789/10082/56131/9071/27445/9971/4131/10979/2066/8506/90102/10391/4208/83700/8128/23284/140689/1000/54549/79953/7057/575/23316/2258/6585/84189/84631/869/54413/57493/10052/15130…
GO:0045121	CC	membrane raft	326	0.479933	1.47689	1e-10	8.62333e-09	6.40585e-09	6366	tags=53%, list=34%, signal=36%	5740/1268/477/931/1272/287/3778/729085/3356/117/4842/119/6442/108/10580/7143/120892/9472/1756/11149/1136/1378/8436/3741/6517/5348/3738/5577/25999/491/4137/284/930/148/973/5979/480/1000/5788/695/6506/23213/6608/2550/4118/7223/5023/493/7010/3751/6530/1901/10333/948/23180/7096/6000/6331/284119/199920/2824/146760/5244/1141/10395/57126/10666/6401/3672/4099/1910/79870/962/2149/6532/3572/5727/30846/19/5…
GO:0010975	BP	regulation of neuron projection development	422	0.467674	1.44867	1e-10	8.62333e-09	6.40585e-09	5970	tags=51%, list=32%, signal=35%	1268/6422/1272/2045/56963/9353/4916/22871/5649/11075/6423/91584/577/6900/4747/223117/257194/2042/22854/7143/120892/158866/1809/482/1136/57689/4135/547/4920/3897/5063/6616/57611/9423/9723/6695/140578/4915/8499/5789/7025/2316/8153/55714/124925/79625/4131/5587/4139/4137/23111/3082/85458/238/5979/5396/10371/1000/4133/6387/23316/2258/6585/1630/1996/9863/2043/80031/5764/22891/1600/5802/10154/56920/1114…
GO:0090066	BP	regulation of anatomical structure size	480	0.46116	1.43406	1e-10	8.62333e-09	6.40585e-09	5385	tags=44%, list=29%, signal=32%	477/2045/9353/3778/185/25802/88/3356/1311/91584/6900/4842/119/4747/10178/223117/6869/6366/2006/7143/2982/120892/7111/4883/130271/3897/5063/57611/3779/9423/155/9723/3741/3363/7484/196740/23500/10800/65267/8153/59/80206/4131/4137/554/10000/23111/5592/148/4825/5979/1236/79822/6840/10371/6546/81553/4133/6387/2258/2852/6585/361/6344/1909/1630/6559/154/80031/6649/1073/57731/5802/5023/3071/4881/552/5692…
GO:0030545	MF	signaling receptor regulator activity	496	0.455816	1.41976	1e-10	8.62333e-09	6.40585e-09	5105	tags=43%, list=27%, signal=32%	4969/7060/64388/651/2045/59353/7432/3479/116/6423/26585/6363/2255/2252/1511/2662/5179/392255/2259/23768/223117/7044/6366/2247/151449/2202/9607/6750/151647/90865/1114/9723/2277/252995/6358/7484/124857/7482/2200/9370/4880/3082/10563/9365/7483/944/3547/4295/5368/85480/10718/654/10371/6387/9244/2258/3603/9542/8200/114900/27123/3481/4852/80031/7857/6360/5764/7043/4856/56920/6886/50810/80763/6356/11617…
GO:0050803	BP	regulation of synapse structure or activity	211	0.515521	1.56529	1.12665e-10	9.60867e-09	7.13781e-09	4971	tags=51%, list=27%, signal=38%	4593/2045/26050/4916/22871/5649/4884/22865/9378/577/57633/23768/257194/347730/2823/120892/158866/145581/547/5063/139065/9423/4915/8499/57030/5789/10082/4208/83992/8128/1000/79953/575/23316/6585/84189/84631/869/54413/2043/7058/246213/11141/266727/1496/8828/158038/4914/6622/91752/3587/64084/54674/1813/6092/4776/26280/94030/816/5021/2213/1141/8292/7846/57555/1006/27286/26045/7476/84628/375323/57463/…
GO:0098857	CC	membrane microdomain	327	0.478689	1.4733	1.5577e-10	1.31406e-08	9.76147e-09	6366	tags=53%, list=34%, signal=36%	5740/1268/477/931/1272/287/3778/729085/3356/117/4842/119/6442/108/10580/7143/120892/9472/1756/11149/1136/1378/8436/3741/6517/5348/3738/5577/25999/491/4137/284/930/148/973/5979/480/1000/5788/695/6506/23213/6608/2550/4118/7223/5023/493/7010/3751/6530/1901/10333/948/23180/7096/6000/6331/284119/199920/2824/146760/5244/1141/10395/57126/10666/6401/3672/4099/1910/79870/962/2149/6532/3572/5727/30846/19/5…
GO:0048018	MF	receptor ligand activity	456	0.450653	1.39924	1.8712e-10	1.56154e-08	1.15999e-08	5037	tags=42%, list=27%, signal=31%	4969/7060/64388/651/2045/7432/3479/116/6423/26585/6363/2255/2252/1511/2662/5179/392255/2259/23768/223117/7044/6366/2247/151449/2202/9607/6750/151647/90865/1114/9723/2277/252995/6358/7484/7482/2200/9370/4880/3082/10563/9365/7483/944/4295/5368/85480/10718/654/10371/6387/9244/2258/3603/9542/8200/114900/3481/4852/80031/7857/6360/5764/7043/4856/56920/50810/80763/6356/116173/959/10457/183/2254/8995/480…
GO:0001653	MF	peptide receptor activity	150	0.553593	1.65675	1.98876e-10	1.64199e-08	1.21976e-08	5527	tags=64%, list=30%, signal=45%	114815/7434/185/4886/117/9340/6869/886/643/2862/2840/22986/4883/6865/57537/2587/2740/10800/554/2925/5745/1233/10316/1236/2829/1524/57105/4161/887/6344/1909/10886/729230/4881/552/1395/2151/3973/4158/5021/4987/1237/1234/3061/6753/1910/10803/4889/10203/2149/2837/1240/7253/2811/4882/187/2826/186/2359/79627/4985/1238/9002/4829/7852/64106/799/6752/10936/4988/4160/10268/1235/623/2834/100996758/56923/123…
GO:0042692	BP	muscle cell differentiation	355	0.47098	1.45198	2.02814e-10	1.65688e-08	1.23081e-08	3848	tags=38%, list=21%, signal=31%	4629/221476/287/3479/25802/5239/11155/2318/26585/10290/2255/88/93649/150572/1311/577/4842/51676/150921/844/50804/9472/23345/1756/11149/7111/6444/22953/348093/221662/8516/7140/58494/284612/3815/51778/93166/64091/124857/3488/6935/10398/80206/8912/405754/8506/70/4208/148/9096/7345/2294/84814/1000/84525/6095/6546/575/5999/2852/9750/1909/5156/3481/338773/6608/57538/1073/9734/4856/89/552/23363/10324/11…
GO:0008528	MF	G protein-coupled peptide receptor activity	144	0.555939	1.66056	2.26442e-10	1.83064e-08	1.35989e-08	5527	tags=65%, list=30%, signal=46%	114815/7434/185/4886/117/9340/6869/886/643/2862/2840/22986/4883/6865/57537/2587/2740/10800/554/2925/5745/1233/10316/1236/2829/1524/57105/4161/887/6344/1909/10886/729230/4881/552/1395/2151/3973/4158/5021/4987/1237/1234/3061/6753/1910/10803/4889/10203/2149/2837/1240/7253/2811/187/2826/186/2359/4985/1238/9002/4829/7852/64106/799/6752/10936/4988/4160/10268/1235/623/2834/100996758/56923/1230/2861/8549…
GO:0070588	BP	calcium ion transmembrane transport	301	0.485213	1.49119	2.42194e-10	1.9378e-08	1.4395e-08	4628	tags=45%, list=25%, signal=34%	477/845/5354/287/5350/6363/3356/57158/4842/844/2903/6366/259232/2247/2823/9472/1756/6543/27092/785/6262/7220/783/57419/140803/6263/286097/80036/774/491/8912/5587/775/930/6547/777/5294/781/57338/84502/1236/114780/3708/2829/6546/5788/2852/1909/55799/9104/6236/7223/492/5023/123041/493/2669/8913/6622/1193/1812/825/5311/3357/2814/1813/2946/168507/4987/6261/28954/6769/5336/7222/1234/1910/786/30845/5027…
GO:0030546	MF	signaling receptor activator activity	463	0.450999	1.40131	2.81574e-10	2.22989e-08	1.65648e-08	5037	tags=42%, list=27%, signal=31%	4969/7060/64388/651/2045/7432/3479/116/6423/26585/6363/2255/2252/1511/2662/5179/392255/2259/23768/223117/7044/6366/2247/151449/2202/9607/6750/151647/90865/1114/9723/2277/252995/6358/7484/7482/2200/9370/4880/3082/10563/9365/7483/944/4295/5368/85480/10718/654/10371/6387/9244/2258/3603/9542/8200/114900/3481/4852/80031/7857/6360/5764/7043/4856/56920/6886/50810/80763/6356/116173/959/10457/183/2254/899…
GO:0071805	BP	potassium ion transmembrane transport	207	0.519879	1.57686	2.93388e-10	2.29999e-08	1.70855e-08	5858	tags=59%, list=31%, signal=41%	477/845/3745/287/3778/88/3736/2273/3776/343450/10060/1804/259232/30820/9472/56479/57628/482/3788/6616/3779/3777/3741/3737/57419/3738/3755/2316/65267/285195/23704/3782/480/5999/170850/219527/3757/6559/3739/123041/3762/3750/3751/6000/5311/6557/3746/3787/3790/486/3768/23416/3752/10021/27133/9312/3764/3780/6833/3773/10242/57582/3792/3763/3769/57463/358/3756/9132/857/30818/23415/56660/27094/285335/126…
GO:0098802	CC	plasma membrane signaling receptor complex	181	0.525029	1.58511	3.44583e-10	2.67431e-08	1.98661e-08	5267	tags=59%, list=28%, signal=43%	5354/9358/2901/2890/729993/2903/1136/27092/8516/2899/3680/10077/375567/3679/973/974/2898/658/7018/2891/2550/11117/388336/50852/3690/8973/8515/10333/7096/3676/2900/3683/1439/2814/1141/9568/1143/54518/126129/3672/2893/917/269/10203/3359/3572/22801/59284/3645/1742/3684/2811/7535/3681/1438/925/440829/7185/118427/3570/799/3687/3667/282618/3689/2895/2892/10268/7048/2911/9180/3674/285242/8809/926/165829…
GO:0050900	BP	leukocyte migration	371	0.464124	1.43416	4.7095e-10	3.61885e-08	2.68827e-08	5239	tags=46%, list=28%, signal=33%	7060/9353/26585/6363/347/1511/6403/119/51676/6869/6366/1269/643/64805/9420/4920/151647/58494/3815/148823/2277/1991/3680/6358/26228/9023/3679/10563/5294/5979/83700/1236/245937/7057/6387/3603/1524/9750/3554/1113/7857/6360/5764/6441/729230/2838/4856/3071/11117/22914/7412/57118/6356/1880/1901/3676/81704/3683/10894/8995/326/80310/146433/6402/56253/6504/131450/5293/7042/6368/57126/84675/1621/6401/3672/…
GO:0015079	MF	potassium ion transmembrane transporter activity	151	0.542559	1.62549	6.29249e-10	4.78784e-08	3.55665e-08	5724	tags=63%, list=31%, signal=44%	477/3745/3778/3736/2901/3776/343450/10060/30820/56479/3788/6616/3779/2899/3777/3741/3737/57419/3738/3755/285195/23704/3782/480/2898/170850/219527/3757/6559/3739/123041/3762/3750/3751/2900/5311/6557/3746/3787/3790/3768/23416/3752/10021/27133/9312/3764/3780/6833/3773/2897/10242/57582/3763/3769/358/3756/9132/30818/23415/56660/27094/285335/126755/3753/7881/81033/30819/3754/131096/6560/25769/3748/3743…
GO:0034709	CC	methylosome	12	-0.858265	-3.24112	6.38575e-10	4.81163e-08	3.57432e-08	2648	tags=100%, list=14%, signal=86%	1207/10419/2079/79084/6633/6635/3276/6637/6632/6636/6628
GO:0090257	BP	regulation of muscle system process	227	0.503769	1.53502	7.47974e-10	5.58175e-08	4.14641e-08	4781	tags=45%, list=26%, signal=34%	477/9464/845/1129/221476/287/5350/3778/3479/1264/29119/3736/93649/4842/6442/844/6869/2982/9472/1756/1136/6865/7140/3815/4660/6262/3488/10398/775/5592/6547/5294/148/4634/6546/2258/5999/2852/1113/154/84676/5023/89/493/114907/80763/1193/6331/183/5152/6329/2946/816/5021/1143/10021/7222/9312/8654/6833/497189/30845/10203/8013/2149/3572/1490/140628/5142/5997/9732/1131/1760/309/857/51738/3270/6752/2702/7…
GO:0006836	BP	neurotransmitter transport	205	0.514585	1.56018	7.55889e-10	5.5871e-08	4.15038e-08	5520	tags=55%, list=30%, signal=39%	1268/477/22871/22999/3356/9378/2901/4842/55117/9899/9379/120892/1136/60482/5579/6865/6616/440279/6572/6860/783/57030/8224/27445/140730/23208/4208/148/28968/22987/143425/2852/6506/9699/5023/246213/6857/3690/8973/6622/6530/9900/5071/9627/6512/6854/8618/1812/5582/2824/22895/1813/815/1143/6571/79772/9783/5027/8825/5028/127833/6532/2668/5413/7476/6623/6511/320/135/107/8447/8564/2555/112755/1103/8676/2…
GO:1901888	BP	regulation of cell junction assembly	197	0.516251	1.56381	7.63804e-10	5.59234e-08	4.15427e-08	6126	tags=59%, list=33%, signal=40%	6422/4593/4653/2045/26050/4916/22871/4884/26585/347/22865/9378/577/57633/23768/257194/347730/2042/145581/139065/9423/11170/4915/5789/10082/10979/90102/4208/8128/79953/7057/575/23316/6585/84189/84631/869/54413/151306/7058/11141/7010/266727/158038/4914/6622/395/183/64084/54674/2824/6092/26280/94030/5021/6910/1141/10395/8292/7122/57555/27286/26045/1307/7476/149461/84628/375323/57463/187/857/9746/234…
GO:0022898	BP	regulation of transmembrane transporter activity	254	0.48866	1.494	1.01018e-09	7.32713e-08	5.44296e-08	5142	tags=48%, list=28%, signal=35%	477/845/287/5350/6327/22871/5649/88/3736/57158/4842/2273/2259/729993/844/9472/1756/482/6330/3788/27092/785/6262/53826/783/5348/644139/3755/55800/65267/5243/4208/781/50944/57338/84502/23704/1393/2258/219527/54413/1909/9104/154/729230/6236/388336/2669/6622/1193/5311/3746/596/1813/3787/2946/486/4987/7402/28954/6769/5336/53822/57555/6833/30845/5923/130497/148811/59284/1742/5142/6324/440829/57463/1131…
GO:0050807	BP	regulation of synapse organization	205	0.513113	1.55571	1.042e-09	7.48792e-08	5.56241e-08	5939	tags=57%, list=32%, signal=39%	4593/2045/26050/4916/22871/5649/4884/22865/9378/577/57633/23768/257194/347730/2823/120892/158866/145581/547/5063/139065/9423/4915/8499/5789/10082/4208/83992/8128/1000/79953/575/23316/6585/84189/84631/869/54413/2043/7058/11141/266727/1496/8828/158038/4914/6622/91752/3587/64084/54674/1813/6092/4776/26280/94030/816/5021/2213/1141/8292/7846/57555/1006/27286/26045/7476/84628/375323/57463/9758/27185/26…
GO:0099634	CC	postsynaptic specialization membrane	116	0.575456	1.70384	1.05791e-09	7.53249e-08	5.59552e-08	3512	tags=53%, list=19%, signal=43%	22866/2045/22871/22865/2901/401190/2890/729993/2903/347730/57689/145581/22986/27092/1740/57537/2558/1008/57502/2894/9890/491/2066/8787/775/1000/79953/2891/54413/1630/2043/2566/5802/388336/3751/5913/64084/94030/1141/53616/3752/57555/8825/9127/1949/59284/26045/1742/2561/107/3756/2555/9746/4985/347731/114798/22829/2895/112476/2911/64101
GO:0035296	BP	regulation of tube diameter	137	0.547454	1.63048	1.13745e-09	7.95291e-08	5.90782e-08	5339	tags=59%, list=29%, signal=42%	477/3778/185/3356/1311/4842/6869/2982/4883/3779/155/3741/3363/196740/10800/59/554/5592/148/6546/2852/1909/154/6649/5023/4881/552/342527/1816/952/1812/183/3357/257313/5021/1621/3672/4313/3274/1910/2303/5028/2149/10242/6532/2837/146/3792/219537/5997/9732/135/6338/1131/857/186/80852/2702/659/3952/59272/59342/6915/1908/846/27345/1906/4878/134/796/150/151/348/553/1373/40/6640/5345/6093/4846/147
GO:0097746	BP	blood vessel diameter maintenance	137	0.547454	1.63048	1.13745e-09	7.95291e-08	5.90782e-08	5339	tags=59%, list=29%, signal=42%	477/3778/185/3356/1311/4842/6869/2982/4883/3779/155/3741/3363/196740/10800/59/554/5592/148/6546/2852/1909/154/6649/5023/4881/552/342527/1816/952/1812/183/3357/257313/5021/1621/3672/4313/3274/1910/2303/5028/2149/10242/6532/2837/146/3792/219537/5997/9732/135/6338/1131/857/186/80852/2702/659/3952/59272/59342/6915/1908/846/27345/1906/4878/134/796/150/151/348/553/1373/40/6640/5345/6093/4846/147
GO:0006937	BP	regulation of muscle contraction	161	0.534755	1.60994	1.18517e-09	8.21261e-08	6.10074e-08	4722	tags=47%, list=25%, signal=36%	477/845/1129/287/5350/3778/1264/29119/3736/93649/4842/844/6869/2982/1756/1136/6865/7140/3815/4660/6262/10398/775/5592/6547/5294/148/4634/6546/2258/2852/1113/154/5023/89/80763/1193/6331/6329/2946/5021/1143/10021/9312/8654/30845/10203/2149/1490/5142/5997/9732/1131/1760/309/857/51738/3270/6752/2702/7168/59272/6915/5144/859/51086/4607/1482/56923/18/1906/4878/134/796/150/151
GO:0051146	BP	striated muscle cell differentiation	261	0.487638	1.49232	1.20108e-09	8.24919e-08	6.12791e-08	3732	tags=39%, list=20%, signal=32%	4629/221476/3479/25802/5239/11155/2318/26585/88/93649/150572/577/4842/51676/844/50804/9472/11149/7111/6444/22953/221662/7140/58494/51778/64091/3488/10398/80206/8912/405754/8506/70/4208/148/9096/84814/1000/84525/6546/575/5999/9750/5156/3481/338773/6608/57538/1073/9734/4856/89/552/23363/10324/115701/4868/825/183/596/6899/6910/29767/7471/56203/6261/8470/1466/91807/3670/30816/64208/5159/7273/30846/90…
GO:0005267	MF	potassium channel activity	118	0.570993	1.6908	1.26471e-09	8.53516e-08	6.34035e-08	5724	tags=69%, list=31%, signal=48%	3745/3778/3736/2901/3776/343450/10060/30820/56479/3788/6616/3779/2899/3777/3741/3737/3738/3755/23704/3782/2898/170850/219527/3757/3739/3762/3750/3751/2900/5311/3746/3787/3790/3768/23416/3752/10021/27133/9312/3764/3780/6833/3773/2897/10242/57582/3763/3769/358/3756/9132/30818/23415/56660/27094/126755/3753/7881/81033/30819/3754/131096/3748/3743/27345/89822/169522/3758/3781/9196/3747/80333/56659/5420…
GO:0032412	BP	regulation of ion transmembrane transporter activity	245	0.487925	1.48906	1.26471e-09	8.53516e-08	6.34035e-08	5610	tags=50%, list=30%, signal=36%	477/845/287/5350/6327/22871/5649/88/3736/57158/4842/2273/2259/729993/844/9472/1756/482/6330/3788/27092/785/6262/53826/783/5348/644139/3755/55800/65267/5243/4208/781/50944/57338/84502/23704/1393/2258/219527/54413/1909/9104/154/729230/6236/388336/2669/1193/5311/3746/1813/3787/2946/486/4987/7402/28954/6769/5336/53822/57555/6833/30845/5923/130497/59284/1742/5142/6324/440829/57463/1131/2040/5924/857/8…
GO:0019199	MF	transmembrane receptor protein kinase activity	79	0.618904	1.78791	1.29653e-09	8.67445e-08	6.44382e-08	5116	tags=66%, list=28%, signal=48%	4593/2045/4916/2042/2202/285220/4921/4920/3815/2322/4052/4915/2066/238/5979/658/5156/2043/7049/2260/2044/7010/8828/4914/25928/5157/558/269/5159/2051/1949/3645/1436/8425/10461/7075/7048/659/6098/8829/2263/2324/2321/657/148738/3791/94/2047/7046/2022/51232/3480
GO:0031589	BP	cell-substrate adhesion	356	0.461692	1.42347	1.32834e-09	8.81135e-08	6.54552e-08	5206	tags=46%, list=28%, signal=34%	6422/25890/4653/340533/26585/158326/7148/88/347/9358/151887/2192/1295/6366/63923/2042/10580/22854/26033/11149/482/23671/3897/8516/55698/9723/11170/6695/3680/10516/8499/7007/2199/2316/375567/79625/10979/284/3679/55679/90102/10391/1842/83700/5212/1236/2294/7057/4852/89/84168/6614/11117/7010/8910/3690/7412/2335/25992/8515/395/948/3676/3683/10894/2824/596/5314/7471/1281/7402/10395/7074/558/3672/57348…
GO:0060079	BP	excitatory postsynaptic potential	93	0.598896	1.74555	1.47152e-09	9.67835e-08	7.18957e-08	3460	tags=54%, list=19%, signal=44%	22871/5649/22999/9378/2901/2903/120892/1136/22953/152404/6543/266743/57502/2743/124925/6547/4208/50944/2898/23316/5999/4355/869/54413/154/9699/5023/8001/8973/6622/1813/66000/56853/1141/1143/57555/5027/9127/7476/84866/1742/135/1760/5026/112755/85358/51738/7442/2895/4988
GO:0097553	BP	calcium ion transmembrane import into cytosol	146	0.545374	1.62994	1.61469e-09	1.05308e-07	7.82279e-08	5946	tags=62%, list=32%, signal=42%	477/845/287/5350/6363/3356/57158/4842/844/2903/6366/2247/9472/1756/6543/6262/7220/6263/774/5587/775/930/6547/777/781/57338/84502/1236/3708/2829/6546/5788/2852/5023/123041/493/6622/1193/1812/825/5311/3357/2814/1813/2946/6261/5336/1234/5027/2149/2811/779/6376/55283/187/773/9002/799/7442/3270/9001/10268/3709/4283/255231/55503/623/27112/5144/2534/728215/25769/11151/7070/776/2904/10345/3596/5335/4923/…
GO:0001505	BP	regulation of neurotransmitter levels	209	0.507835	1.54078	1.67864e-09	1.08566e-07	8.06482e-08	5520	tags=54%, list=30%, signal=38%	1268/477/22871/145270/22999/3356/9378/2901/4842/590/9379/120892/1136/60482/26002/5579/6865/6616/440279/6860/783/8224/27445/140730/23208/4208/148/5153/143425/2852/6506/9699/5023/6857/3690/8973/6622/6530/9900/5071/9627/6512/6854/8618/1812/5582/2824/22895/1813/4129/8292/815/1143/1621/6571/79772/9783/5027/8825/5028/127833/6532/2668/5413/7476/6623/6511/320/135/107/8447/8564/2555/112755/1103/8676/2670/…
GO:0023061	BP	signal release	445	0.447955	1.39006	1.74258e-09	1.1177e-07	8.30285e-08	5152	tags=42%, list=28%, signal=31%	1268/6422/3745/111/7432/185/22871/116/22999/3356/9378/2901/6869/886/9379/120892/9607/169026/640/1136/5579/6865/6616/440279/2850/6860/1363/3741/2587/3737/25924/783/8224/27445/140730/9971/9370/83849/23208/4208/148/4825/2822/148281/654/1393/6387/143425/2852/695/1113/341359/2550/9699/4856/5023/387597/114899/222546/2044/6857/952/8973/6622/9900/5071/9627/6854/8618/4826/1812/183/5582/22895/1813/4129/502…
GO:0035150	BP	regulation of tube size	138	0.549731	1.63748	1.8385e-09	1.16956e-07	8.68808e-08	5339	tags=59%, list=29%, signal=43%	477/3778/185/3356/1311/4842/6869/2982/4883/3779/155/3741/3363/7484/196740/10800/59/554/5592/148/6546/2852/1909/154/6649/5023/4881/552/342527/1816/952/1812/183/3357/257313/5021/1621/3672/4313/3274/1910/2303/5028/2149/10242/6532/2837/146/3792/219537/5997/9732/135/6338/1131/857/186/80852/2702/659/3952/59272/59342/6915/1908/846/27345/1906/4878/134/796/150/151/348/553/1373/40/6640/5345/6093/4846/147
GO:0043197	CC	dendritic spine	172	0.53026	1.59913	1.93442e-09	1.22057e-07	9.06704e-08	3554	tags=44%, list=19%, signal=36%	477/4804/22871/88/56899/4842/401190/2890/729993/2903/2823/6543/8516/57537/4915/8499/5064/5577/124925/491/4131/4137/23208/9162/1410/6547/50944/83992/57451/79953/6546/575/2852/4355/55619/2891/5662/54873/2043/3739/55607/2550/388336/3750/3751/91752/11178/1812/2913/22895/1813/2213/3752/815/11346/2893/6503/9127/1742/5142/320/440829/9758/26052/4985/8572/85358/7442/2895/112476/9001/4988/2892/9495/64101/3…
GO:0051208	BP	sequestering of calcium ion	123	0.551868	1.63867	2.41402e-09	1.51091e-07	1.12238e-07	3861	tags=45%, list=21%, signal=36%	477/845/287/5350/6363/3356/57158/4842/844/6366/2247/9472/1756/6262/7220/6263/5587/775/930/57338/84502/1236/3708/2829/6546/5788/2852/6622/1193/1812/825/5311/3357/2814/1813/2946/6261/5336/1234/5027/2149/2811/6376/55283/187/309/9002/7442/3270/9001/3709/4283/255231/623/5144
GO:0032409	BP	regulation of transporter activity	271	0.479369	1.46918	2.47797e-09	1.53852e-07	1.14289e-07	5610	tags=49%, list=30%, signal=35%	477/845/287/5350/6327/22871/5649/88/3736/57158/4842/2273/2259/729993/844/9472/1756/482/6330/3788/27092/785/6262/53826/783/5348/644139/3755/55800/65267/9370/5243/4208/781/50944/57338/84502/23704/1393/2258/219527/54413/1909/9104/154/729230/6236/388336/2669/6622/1193/5311/3746/596/1813/3787/2946/486/4987/7402/28954/6769/5336/53822/115584/57555/6833/30845/5923/130497/148811/59284/1742/5142/6324/44082…
GO:0031644	BP	regulation of nervous system process	135	0.545748	1.62483	2.57389e-09	1.57291e-07	1.16844e-07	4687	tags=52%, list=25%, signal=39%	7432/22871/5649/4884/22999/9378/55273/729993/11280/7143/120892/9607/152404/6543/27092/151647/26011/58494/23467/10810/57502/9228/6547/3082/50944/23316/5999/869/54413/154/9229/9699/4856/388336/552/80763/183/66000/1959/56853/4987/1143/4099/57555/1910/2149/7476/84866/1742/1760/4985/112755/85358/51738/3687/4885/3586/4988/2911/400746/56923/2741/2257/18/1906/134/729956/81832/9294/85446
GO:0044309	CC	neuron spine	173	0.526931	1.58884	2.57389e-09	1.57291e-07	1.16844e-07	3554	tags=44%, list=19%, signal=36%	477/4804/22871/88/56899/4842/401190/2890/729993/2903/2823/6543/8516/57537/4915/8499/5064/5577/124925/491/4131/4137/23208/9162/1410/6547/50944/83992/57451/79953/6546/575/2852/4355/55619/2891/5662/54873/2043/3739/55607/2550/388336/3750/3751/91752/11178/1812/2913/22895/1813/2213/3752/815/11346/2893/6503/9127/1742/5142/320/440829/9758/26052/4985/8572/85358/7442/2895/112476/9001/4988/2892/9495/64101/3…
GO:0035249	BP	synaptic transmission, glutamatergic	92	0.589653	1.71814	2.98954e-09	1.81264e-07	1.34652e-07	3835	tags=55%, list=21%, signal=44%	1268/477/22871/5649/3356/9378/2901/7143/120892/27092/4920/2899/440279/57030/2894/9890/9162/4208/1000/2898/57616/2891/54413/2916/729230/5023/246213/6857/4914/5071/2900/1812/2913/5270/1813/5021/57555/1006/2897/59284/135/27185/8564/9746/85358/22943/2895/2911/2914/2917/23025
GO:0007200	BP	phospholipase C-activating G protein-coupled receptor signaling pathway	102	0.58169	1.70535	3.18138e-09	1.91401e-07	1.42182e-07	4222	tags=58%, list=23%, signal=45%	1129/7432/185/88/3356/6869/5733/886/2840/64805/4883/2850/2099/84636/2925/27334/148/5745/10316/2843/286530/1524/887/1113/1816/1901/1812/2151/183/3357/3973/1813/2846/4987/1902/1910/5028/2149/1240/146/9290/2841/2922/9630/8477/2359/7052/4985/9002/4829/719/4988/2911/10161/5330/728/846/56923/27202
GO:0099565	BP	chemical synaptic transmission, postsynaptic	99	0.58626	1.71354	3.50238e-09	2.07496e-07	1.54138e-07	5267	tags=65%, list=28%, signal=47%	22871/5649/22999/9378/2901/2903/120892/1136/22953/152404/6543/388135/266743/57502/2743/124925/6547/4208/50944/2898/23316/5999/4355/869/54413/154/9699/5023/8001/8973/6622/1813/66000/56853/1141/1143/57555/5027/9127/7476/84866/1742/135/1760/5026/112755/85358/51738/7442/2895/642938/4988/2741/18/134/2904/81832/9294/1137/1142/2742/4923/23542/1145
GO:0006941	BP	striated muscle contraction	170	0.523848	1.57854	3.50238e-09	2.07496e-07	1.54138e-07	4604	tags=46%, list=25%, signal=35%	477/845/287/5350/23336/6327/29119/1837/4842/844/1756/6330/6444/7140/6262/3741/783/55800/2316/775/6547/23676/5294/148/781/4634/23704/6546/2258/3757/1113/10052/89/3762/92241/10324/8913/1193/6331/6329/2946/56203/6769/3752/10021/51761/3764/8654/30845/4626/7273/6323/1490/5142/5997/6324/1760/857/2697/7852/3753/4621/3270/2934/2702/7168/59272/342667/5144/859/51086/4607/1482/2257/5290/4878/776/3781/134
GO:0140375	MF	immune receptor activity	142	0.536261	1.6001	3.69516e-09	2.17259e-07	1.61391e-07	5680	tags=65%, list=31%, signal=45%	1380/2674/643/2840/2690/1378/2676/2322/23547/2675/3977/1233/1236/3568/2829/64109/9244/3953/1524/3554/729230/54756/22914/9173/3111/3587/1439/26280/2213/131450/133396/1237/3575/1234/11126/10803/3572/1240/51348/3112/3593/1438/400935/11024/8322/2826/10148/100528032/2359/3590/3117/1238/3570/10990/7852/116379/719/10936/3824/10859/50615/9180/1235/8809/3140/3581/728/920/4352/3118/3594/1271/8807/1230/2720…
GO:0055001	BP	muscle cell development	172	0.526404	1.5875	3.75943e-09	2.19375e-07	1.62963e-07	5600	tags=55%, list=30%, signal=39%	4629/221476/287/3479/25802/5239/11155/2318/88/1311/51676/844/9472/1756/11149/7111/6444/22953/7140/284612/51778/124857/10398/80206/8506/70/148/9096/7345/6546/5999/9750/1909/5156/6608/57538/1073/9734/89/23363/10324/115701/825/183/596/4776/6910/29767/56203/6261/8470/1466/91807/3670/5159/7273/90342/7480/3792/30008/5997/79933/92737/84700/4621/4773/84033/7168/58529/4703/8291/4205/1465/859/1482/4015/190…
GO:0098948	CC	intrinsic component of postsynaptic specialization membrane	80	0.615369	1.77703	3.82369e-09	2.2146e-07	1.64512e-07	3512	tags=60%, list=19%, signal=49%	2045/22871/22865/2901/401190/2890/729993/2903/347730/57689/145581/22986/27092/2558/1008/57502/2894/9890/491/2066/1000/54413/1630/2566/5802/388336/3751/64084/94030/1141/53616/3752/57555/9127/1949/59284/26045/1742/2561/107/2555/9746/4985/347731/114798/22829/2895/64101
GO:0098815	BP	modulation of excitatory postsynaptic potential	38	0.71527	1.95076	4.01647e-09	2.30903e-07	1.71526e-07	3145	tags=66%, list=17%, signal=55%	22871/5649/22999/9378/120892/152404/6543/57502/6547/50944/23316/5999/869/54413/154/9699/66000/56853/57555/7476/84866/1742/1760/112755/85358
GO:0098982	CC	GABA-ergic synapse	70	0.630574	1.80593	4.72336e-09	2.69544e-07	2.00231e-07	3725	tags=63%, list=20%, signal=50%	1268/22865/347730/2982/2596/145581/2558/1008/57502/27445/2743/491/2066/2567/148/140689/84631/54413/2566/2550/492/266727/3751/440073/8927/9900/1812/1813/3752/57555/2570/26045/22997/2561/2555/9746/23236/26059/114798/53942/22829/27253/388662/2560
GO:0043270	BP	positive regulation of ion transport	269	0.479165	1.4679	4.78762e-09	2.71217e-07	2.01474e-07	6270	tags=55%, list=34%, signal=37%	1272/5354/287/5649/88/3736/57158/117/4842/4638/2273/844/9472/1756/482/6330/22953/64805/27092/6865/3779/6262/6860/7220/783/5348/644139/55800/2316/65267/930/5243/781/6387/2852/219527/54413/3757/1909/2916/9104/154/729230/2550/5023/552/6857/6622/6000/6331/1812/825/183/3718/5311/3746/1813/2946/486/1141/6769/815/5336/7222/6833/30845/5159/5027/57165/5028/2149/6532/2668/22925/2641/6376/6324/57463/135/187…
GO:0006939	BP	smooth muscle contraction	108	0.573286	1.68676	4.98041e-09	2.80094e-07	2.08068e-07	3389	tags=50%, list=18%, signal=41%	4629/477/1129/3778/1264/93649/3356/1311/4638/6869/5733/2982/1136/22953/6865/3815/3363/59/5592/322/148/10316/6546/2852/1909/154/23213/5023/493/952/80763/1812/183/3357/1813/5021/1141/1143/9312/1910/497189/10203/2149/2668/6525/5997/9732/6338/1131/857/51738/7442/80852/6752
GO:0007189	BP	adenylate cyclase-activating G protein-coupled receptor signaling pathway	152	0.531768	1.59446	7.29766e-09	4.07462e-07	3.02683e-07	5177	tags=58%, list=28%, signal=42%	1268/111/7432/5350/116/283383/577/5733/1269/108/5737/155/5731/2587/2740/148/5745/2774/1903/2849/23284/575/2852/4161/1113/154/23266/493/1816/1901/1812/3973/1813/4158/5744/4987/1902/2695/10149/10203/23566/19/146/576/54331/23432/7253/2641/5142/27201/8477/135/118442/107/196883/5739/797/114131/799/64123/4988/4160/10268/6915/4283/2015/113/5144/84658/11069/8698/139378/114/56246/8549/10266/796/57561/9294…
GO:0001764	BP	neuron migration	164	0.523568	1.57666	7.42682e-09	4.11711e-07	3.0584e-07	3217	tags=40%, list=17%, signal=34%	460/4916/340533/5649/285313/9201/6900/23768/63923/886/22854/2823/1641/9423/2676/6695/84623/4915/79625/4131/4139/5592/10752/4692/4208/1233/4825/10718/10371/23284/6387/2258/1630/2260/1600/266727/1496/8828/51473/1812/1813/8929/816/137970/1281/26468/57556/558/815/54328/8941/221692/57057/387119/347733/84628/346288/6376/9856/2625/27185/5414/29967/2697/7852/92737
GO:0007611	BP	learning or memory	262	0.475447	1.45496	7.8143e-09	4.30119e-07	3.19514e-07	5149	tags=48%, list=28%, signal=35%	1268/477/4593/7432/5649/5803/9369/3356/54112/9378/577/6900/2890/3776/590/139411/6869/2903/7143/9379/22986/6543/64478/6865/6616/8516/3815/2558/6860/2740/266743/4915/6517/57502/5577/4130/4137/23208/1620/6547/2925/4208/50944/6326/57338/84502/5153/814/1393/23316/2258/1524/54413/1996/2334/5764/1816/4914/6356/5071/5176/1812/183/5582/4803/1813/7436/4776/1959/5021/1141/29767/4987/2695/1621/57144/7122/683…
GO:0019722	BP	calcium-mediated signaling	199	0.499664	1.51326	8.20178e-09	4.48268e-07	3.32996e-07	5367	tags=50%, list=29%, signal=36%	477/845/287/5350/185/3479/55273/6403/933/844/2903/643/120892/9472/1756/6444/22953/5737/64805/6543/6262/51778/10231/4137/775/1233/10316/1236/3708/2829/6546/5788/1524/695/9104/55607/729230/123041/89/493/552/50852/7412/1193/3357/4776/2946/5443/1237/5336/6401/1234/79772/1910/10803/5027/1240/576/374403/345611/7535/1131/2826/27040/1760/5026/1238/64581/83988/7852/3270/151651/4773/1235/58529/84174/4772/2…
GO:0051282	BP	regulation of sequestering of calcium ion	119	0.555786	1.64622	9.23505e-09	4.97731e-07	3.6974e-07	3861	tags=46%, list=21%, signal=37%	477/845/287/5350/6363/3356/57158/4842/844/6366/2247/9472/1756/6262/7220/6263/5587/775/930/57338/84502/1236/3708/2829/6546/5788/2852/6622/1193/1812/825/5311/3357/2814/1813/2946/6261/5336/1234/5027/2149/2811/6376/55283/187/309/9002/7442/3270/9001/3709/4283/255231/623/5144
GO:0051962	BP	positive regulation of nervous system development	264	0.480898	1.4716	9.23505e-09	4.97731e-07	3.6974e-07	5032	tags=47%, list=27%, signal=35%	9353/26050/22871/5649/5803/22865/9378/91584/577/57633/4747/23768/347730/4135/443/3897/5063/26011/57611/139065/9423/3815/2737/140578/4915/5789/8153/4131/4137/85458/4825/8128/1638/79953/575/6387/23316/2852/1524/84189/84631/869/54413/2043/7058/6608/5764/22891/10154/11141/23363/158038/4914/2335/5176/6091/5270/64084/54674/4803/1813/6092/146433/1959/94030/816/5021/7074/4099/57555/1826/57165/3572/23566/…
GO:0051283	BP	negative regulation of sequestering of calcium ion	117	0.558276	1.65381	9.62253e-09	5.15038e-07	3.82596e-07	3861	tags=47%, list=21%, signal=37%	477/845/287/5350/6363/3356/57158/4842/844/6366/2247/9472/1756/6262/7220/6263/5587/775/930/57338/84502/1236/3708/2829/6546/5788/2852/6622/1193/1812/825/5311/3357/2814/1813/2946/6261/5336/1234/5027/2149/2811/6376/55283/187/309/9002/7442/3270/9001/3709/4283/255231/623/5144
GO:0019226	BP	transmission of nerve impulse	73	0.614345	1.76328	9.88085e-09	5.25242e-07	3.90176e-07	3251	tags=56%, list=17%, signal=47%	6332/3736/54112/23114/11280/7143/9607/27092/3737/4915/6328/8912/8506/6326/83700/2898/2852/57731/5023/552/1816/3751/8913/1901/6335/6331/1812/183/6329/1133/1143/4099/10242/6323/8911/59284/149461/6324/6334/27094/51738
GO:0040013	BP	negative regulation of locomotion	318	0.464228	1.42774	1.03975e-08	5.48945e-07	4.07784e-07	5257	tags=47%, list=28%, signal=35%	6422/4804/9353/340533/1545/6423/26585/93649/347/4223/2192/127435/223117/6366/63923/11122/89795/2247/1809/482/23671/9723/1991/26228/3488/8434/9370/4163/5592/1634/10563/90102/4208/10718/9241/10371/753/7057/575/6387/6585/1524/9750/3036/9104/9863/2043/80031/23213/4856/493/11117/56920/8646/22914/5797/51466/5176/6091/596/1813/6092/6910/1281/131450/10395/50859/25932/57556/126820/54328/10500/7122/6833/79…
GO:0099056	CC	integral component of presynaptic membrane	67	0.62889	1.79164	1.18182e-08	6.19739e-07	4.60374e-07	3460	tags=58%, list=19%, signal=48%	1268/57863/3736/3356/2901/2823/8745/2558/1008/3737/53826/3738/5789/491/2066/148/6326/1000/6506/2043/2550/492/5023/493/8973/2900/1812/2913/3746/1813/1141/5028/6532/1949/135/4985/112476/27253/4988
GO:0019233	BP	sensory perception of pain	98	0.57568	1.68133	1.20766e-08	6.29035e-07	4.67279e-07	4785	tags=56%, list=26%, signal=42%	1268/7432/4886/3736/3356/55273/5179/6863/23349/6869/2903/11280/1269/151647/3737/55800/4692/7345/6387/729230/4856/3751/80763/4914/6335/1141/4987/2695/57555/1910/5027/5028/2149/6323/3593/10893/4985/7852/3231/7442/23621/3586/4988/2911/623/2534/56923/6347/1906/54463/134/796/85446/2047/1137
GO:0032970	BP	regulation of actin filament-based process	382	0.45103	1.39481	1.29807e-08	6.71621e-07	4.98914e-07	5456	tags=42%, list=29%, signal=30%	6422/477/171024/4653/9353/287/5350/4916/25802/29119/88/119/10178/6869/6366/2042/2006/7111/23671/130271/5063/84952/9723/6262/11170/10810/54551/23500/26228/2316/8153/59/80206/10979/775/90102/10391/85458/22843/50944/83700/1236/79822/6840/81553/6387/2258/5999/5156/1073/57731/7043/122786/3071/2044/55243/7010/1496/6356/51466/5071/1901/395/4868/10602/6331/2824/29767/5962/1902/146206/56203/10395/11346/10…
GO:0005750	CC	mitochondrial respiratory chain complex III	11	-0.84886	-3.11557	1.33794e-08	6.83141e-07	5.07471e-07	2822	tags=73%, list=15%, signal=62%	7381/10975/7388/29796/440567/7384/27089/1537
GO:0045275	CC	respiratory chain complex III	11	-0.84886	-3.11557	1.33794e-08	6.83141e-07	5.07471e-07	2822	tags=73%, list=15%, signal=62%	7381/10975/7388/29796/440567/7384/27089/1537
GO:0071162	CC	CMG complex	11	-0.847031	-3.10886	1.57741e-08	8.00151e-07	5.94393e-07	2856	tags=100%, list=15%, signal=85%	84296/4174/4172/64785/9837/4171/4176/4173/8318/51659
GO:0034705	CC	potassium channel complex	88	0.587986	1.70691	1.85613e-08	9.35418e-07	6.94876e-07	5666	tags=72%, list=30%, signal=50%	3745/3778/3736/2901/3776/10060/1804/30820/56479/57628/3788/3779/2899/3741/3737/3738/3755/2898/170850/219527/3757/3739/3762/3750/3751/2900/3746/3787/3790/3752/10021/9312/3764/3780/6833/3773/10242/3763/3756/9132/30818/23415/27094/126755/3753/7881/30819/3754/3748/3743/27345/169522/3758/9196/26047/3747/80333/610/27012/26251/23630/3785/8514
GO:0048167	BP	regulation of synaptic plasticity	183	0.505573	1.52623	1.88209e-08	9.42381e-07	7.00048e-07	4778	tags=49%, list=26%, signal=37%	3745/5649/22999/6900/2890/729993/2903/347730/7143/152404/22986/6543/6616/440279/57537/152330/3815/6860/11170/266743/4915/4130/9145/4131/4137/10590/6547/4208/57338/84502/2898/575/4355/57616/1524/869/6344/2043/5764/9699/388336/1395/1816/952/6622/11178/10858/1812/183/5270/5582/1813/4776/1959/816/2695/815/79772/9783/5923/26045/1742/6376/6343/440829/135/57282/107/5924/51201/85358/2670/26059/2895/11247…
GO:2001257	BP	regulation of cation channel activity	163	0.518488	1.56088	2.03785e-08	1.01383e-06	7.53123e-07	5610	tags=57%, list=30%, signal=40%	845/287/5350/22871/5649/88/3736/57158/4842/2259/729993/844/9472/1756/3788/27092/785/783/644139/3755/4208/781/50944/57338/84502/23704/1393/2258/219527/54413/1909/154/729230/6236/388336/2669/1193/5311/3746/1813/3787/2946/4987/28954/6769/5336/57555/6833/30845/5923/59284/1742/5142/440829/57463/2040/5924/857/85358/126755/3753/3270/9001/7881/79026/4988/342667/30819/146395/5144/6347/2257/10681/1906/4878…
GO:0051965	BP	positive regulation of synapse assembly	62	0.633694	1.79807	2.06381e-08	1.0202e-06	7.57859e-07	3502	tags=61%, list=19%, signal=50%	26050/22871/22865/9378/577/57633/23768/347730/139065/4915/5789/8128/79953/575/23316/84189/84631/869/54413/7058/11141/158038/4914/64084/54674/94030/5021/57555/27286/26045/7476/57463/9746/347731/114798/51738/2895/23767
GO:2000146	BP	negative regulation of cell motility	283	0.467514	1.43419	2.3234e-08	1.13408e-06	8.42454e-07	5244	tags=47%, list=28%, signal=35%	6422/4804/9353/340533/1545/6423/26585/93649/347/4223/2192/127435/6366/63923/11122/89795/2247/1809/482/23671/26228/3488/8434/9370/4163/5592/1634/10563/90102/4208/10718/9241/10371/753/7057/575/6387/1524/9750/3036/9104/9863/2043/80031/23213/4856/493/11117/8646/22914/5797/51466/5176/6091/596/1813/6910/1281/131450/10395/50859/25932/126820/54328/7122/6833/79772/79812/25817/4286/89927/11240/4838/149461/…
GO:0060326	BP	cell chemotaxis	295	0.466184	1.4316	2.3234e-08	1.13408e-06	8.42454e-07	5239	tags=45%, list=28%, signal=33%	7060/9353/185/26585/6363/1511/64094/6366/1269/643/2247/9420/151647/3815/2277/3680/6358/26228/9023/5587/3082/10563/5294/1233/83700/1236/2829/245937/7057/6387/3603/1524/9750/5156/1113/7857/6360/5764/2260/6441/729230/4856/3071/22914/7412/57118/6356/1880/1901/80310/146433/6504/1902/5293/7042/6368/1237/3672/1234/1910/10803/5159/11240/120425/1240/5142/57580/2841/6376/7424/9732/51176/6367/2826/1436/9547…
GO:0099054	BP	presynapse assembly	49	0.667865	1.86575	2.583e-08	1.23745e-06	9.19238e-07	3679	tags=63%, list=20%, signal=51%	26050/4916/22871/22865/145581/139065/57502/5789/10082/27445/84189/84631/869/54413/11141/266727/8927/6622/26280/94030/57555/7476/84628/9746/347731/114798/53942/22829/22943/27253/8321
GO:0015276	MF	ligand-gated ion channel activity	144	0.528178	1.57764	2.583e-08	1.23745e-06	9.19238e-07	5107	tags=60%, list=27%, signal=44%	2901/2890/10060/2903/1136/22953/1261/2899/2558/6262/2894/6263/2743/2567/3782/3708/2898/2891/3757/2566/5023/3762/8001/8973/1258/2900/5311/2564/1141/6261/3768/1143/10021/2893/3764/3780/6833/2570/5027/3359/3773/2897/9127/3763/2561/3769/51555/6338/2568/55283/358/309/5026/2555/7442/2895/2892/81033/1080/3709/285242/1262/255231/2560/357/9177/116443/55879/2741/2557/54714/2562/55515/3758/79054/3781/2554/2…
GO:0022834	MF	ligand-gated channel activity	144	0.528178	1.57764	2.583e-08	1.23745e-06	9.19238e-07	5107	tags=60%, list=27%, signal=44%	2901/2890/10060/2903/1136/22953/1261/2899/2558/6262/2894/6263/2743/2567/3782/3708/2898/2891/3757/2566/5023/3762/8001/8973/1258/2900/5311/2564/1141/6261/3768/1143/10021/2893/3764/3780/6833/2570/5027/3359/3773/2897/9127/3763/2561/3769/51555/6338/2568/55283/358/309/5026/2555/7442/2895/2892/81033/1080/3709/285242/1262/255231/2560/357/9177/116443/55879/2741/2557/54714/2562/55515/3758/79054/3781/2554/2…
GO:0099060	CC	integral component of postsynaptic specialization membrane	77	0.609714	1.7575	2.63492e-08	1.25458e-06	9.31962e-07	3512	tags=60%, list=19%, signal=49%	2045/22871/22865/2901/2890/729993/2903/347730/57689/145581/22986/27092/2558/1008/57502/2894/9890/491/2066/1000/54413/1630/2566/5802/388336/3751/64084/94030/1141/53616/3752/57555/9127/1949/59284/26045/2561/107/2555/9746/4985/347731/114798/22829/2895/64101
GO:0034706	CC	sodium channel complex	26	0.767935	2.00765	2.69787e-08	1.27672e-06	9.48411e-07	3037	tags=81%, list=16%, signal=68%	6332/6327/2901/11280/6330/2899/55800/6328/8912/6326/2898/8913/6335/2900/6331/6329/6323/8911/6324/6338/6334
GO:0003779	MF	actin binding	436	0.439442	1.36308	2.79144e-08	1.31299e-06	9.75357e-07	5426	tags=42%, list=29%, signal=31%	4629/171024/56776/3778/25802/11155/2318/1264/29119/88/4638/119/91977/10580/120892/23345/1756/54221/7111/7145/56062/63876/130271/27295/7140/11170/91624/6876/51778/25924/10810/9499/783/8522/23500/800/2316/4130/80206/4131/10979/4137/10486/8736/10391/85458/4628/4606/4634/6840/84940/881/8735/55607/23022/283446/1073/57731/89/84168/339768/23136/1496/92241/137735/6622/6530/51466/5071/140469/7456/26249/51…
GO:0002683	BP	negative regulation of immune system process	401	0.444923	1.37675	2.94797e-08	1.37826e-06	1.02384e-06	5676	tags=46%, list=31%, signal=33%	1380/1268/6422/9353/26585/347/1511/933/6366/1269/9607/640/145581/1378/115352/23495/2737/10875/5169/10077/26228/2200/4057/9370/284/2/23208/26279/671/54900/2294/7057/5788/6387/2852/1524/9750/695/710/4852/55024/6441/729230/7043/4856/387597/3071/11117/10234/22914/9173/3111/116449/197358/8832/10457/3718/284021/79037/1813/4068/56253/2615/2213/6504/1281/131450/7042/133396/558/3575/1831/8654/339390/11126…
GO:0099172	BP	presynapse organization	51	0.659841	1.84869	3.10449e-08	1.44275e-06	1.07175e-06	3775	tags=63%, list=20%, signal=50%	26050/4916/22871/22865/145581/139065/57502/5789/10082/27445/84189/84631/869/54413/11141/266727/8927/6622/26280/94030/57555/7476/84628/9746/347731/114798/53942/22829/22943/27253/8321/728
GO:0051209	BP	release of sequestered calcium ion into cytosol	116	0.55589	1.64591	3.15667e-08	1.45827e-06	1.08327e-06	3861	tags=47%, list=21%, signal=37%	477/845/287/5350/6363/3356/57158/4842/844/6366/2247/9472/1756/6262/7220/6263/5587/775/930/57338/84502/1236/3708/2829/6546/5788/2852/6622/1193/1812/825/5311/3357/2814/1813/2946/6261/5336/1234/5027/2149/2811/6376/55283/187/9002/7442/3270/9001/3709/4283/255231/623/5144
GO:0007269	BP	neurotransmitter secretion	143	0.528497	1.57778	3.41754e-08	1.56021e-06	1.159e-06	3995	tags=46%, list=21%, signal=37%	1268/22871/22999/3356/9378/2901/9379/120892/1136/5579/6865/6616/440279/6860/783/8224/27445/140730/23208/4208/148/143425/2852/9699/5023/6857/8973/6622/9900/5071/9627/6854/8618/1812/5582/22895/1813/815/1143/79772/9783/5027/8825/5028/127833/5413/7476/6623/320/135/107/8447/8564/112755/8676/26059/112476/23621/9751/2914/9381/84446/23025/116443/10814/2054
GO:0099643	BP	signal release from synapse	143	0.528497	1.57778	3.41754e-08	1.56021e-06	1.159e-06	3995	tags=46%, list=21%, signal=37%	1268/22871/22999/3356/9378/2901/9379/120892/1136/5579/6865/6616/440279/6860/783/8224/27445/140730/23208/4208/148/143425/2852/9699/5023/6857/8973/6622/9900/5071/9627/6854/8618/1812/5582/22895/1813/815/1143/79772/9783/5027/8825/5028/127833/5413/7476/6623/320/135/107/8447/8564/112755/8676/26059/112476/23621/9751/2914/9381/84446/23025/116443/10814/2054
GO:0032102	BP	negative regulation of response to external stimulus	379	0.445846	1.37848	3.52189e-08	1.59845e-06	1.18741e-06	5676	tags=46%, list=31%, signal=33%	5740/56963/9353/3479/26585/22915/223117/1269/7143/2247/9607/145581/1378/9723/170692/1991/10875/5169/26228/9971/4057/9370/2/23208/5592/3082/10563/90102/2294/10371/6095/7057/5788/2852/6585/5156/710/4852/2043/80031/135228/5802/4856/114899/56920/7010/1496/22914/80763/2191/197358/5176/6091/1812/5270/5627/1813/146760/6092/313/2213/131450/57556/10500/3670/6833/387837/25817/4889/10203/10225/11240/10512/5…
GO:0051960	BP	regulation of nervous system development	429	0.438507	1.35955	3.9393e-08	1.77749e-06	1.32041e-06	5922	tags=47%, list=32%, signal=33%	2045/9353/26050/4916/22871/5649/5803/22865/9378/91584/577/57633/4747/23768/223117/347730/7143/4135/443/3897/5063/26011/57611/139065/58494/9423/3815/9723/6860/2737/140578/4915/10810/5789/23500/222223/8153/4131/283659/4137/1620/23111/3082/85458/4825/6258/8128/9241/10371/1638/79953/575/4133/6387/163175/23316/2258/2852/6585/1524/84189/84631/869/54413/1630/2043/80031/7058/6608/5764/22891/1600/5802/101…
GO:0060048	BP	cardiac muscle contraction	131	0.537089	1.59806	3.99147e-08	1.79062e-06	1.33017e-06	4604	tags=47%, list=25%, signal=36%	477/845/287/5350/6327/29119/4842/1756/6330/6444/6262/3741/783/55800/2316/775/5294/148/781/4634/23704/6546/2258/3757/1113/10052/3762/8913/1193/6331/2946/3752/10021/3764/8654/30845/7273/6323/1490/5142/5997/6324/857/2697/7852/3753/3270/2934/2702/7168/59272/5144/859/51086/4607/1482/2257/5290/4878/776/3781/134
GO:0004714	MF	transmembrane receptor protein tyrosine kinase activity	60	0.633457	1.79314	4.04365e-08	1.80361e-06	1.33981e-06	5116	tags=65%, list=28%, signal=47%	4593/2045/4916/2042/2202/285220/4921/4920/3815/2322/4915/2066/238/5979/5156/2043/2260/2044/7010/8828/4914/5157/558/5159/2051/1949/3645/1436/10461/7075/6098/8829/2263/2324/2321/3791/2047/51232/3480
GO:0005249	MF	voltage-gated potassium channel activity	88	0.580886	1.6863	4.3567e-08	1.93213e-06	1.43529e-06	5724	tags=73%, list=31%, signal=51%	3745/3778/3736/3776/343450/10060/56479/3788/6616/3777/3741/3737/3738/3755/23704/3782/170850/219527/3757/3739/3762/3750/3751/5311/3746/3787/3790/3768/23416/3752/10021/27133/9312/3764/3780/6833/3773/57582/3763/3769/3756/9132/23415/126755/3753/7881/81033/30819/3754/131096/3748/3743/169522/3758/3781/9196/3747/610/27012/26251/23630/3785/8514/90134
GO:0090287	BP	regulation of cellular response to growth factor stimulus	287	0.463732	1.424	4.40887e-08	1.94416e-06	1.44422e-06	6014	tags=52%, list=32%, signal=35%	91851/64388/6422/56963/4804/9353/6424/6423/26585/2255/93649/64094/2247/494470/23089/168667/348093/5579/8516/64399/23090/4052/54829/222223/124857/6935/2200/375567/23111/1634/10563/2719/9839/9241/753/7057/6425/8200/23213/25960/7049/2260/135228/7043/9508/493/11117/8646/54756/55816/3690/222663/11167/6091/183/2254/66000/25928/7471/57556/79812/7041/3175/57057/65997/3593/199699/7448/1149/7424/286204/832…
GO:0042776	BP	proton motive force-driven mitochondrial ATP synthesis	16	-0.724323	-2.95209	4.63727e-08	2.03333e-06	1.51046e-06	5141	tags=100%, list=28%, signal=72%	84277/498/522/515/539/10632/514/509/10476/65990/506/521/30968/9551/513
GO:0050890	BP	cognition	301	0.463842	1.42551	6.13478e-08	2.67483e-06	1.987e-06	4785	tags=44%, list=26%, signal=33%	1268/477/4593/7432/5649/5803/9369/3356/54112/9378/577/6900/2890/3776/590/139411/6869/2903/7143/9379/22986/6543/64478/6865/6616/8516/3815/2558/6860/11170/2740/266743/4915/6517/57502/5577/4130/4137/23208/1620/6547/2925/10752/4208/50944/6326/57338/84502/5153/814/151556/1393/55084/23316/2258/1524/54413/1996/2334/5764/1816/4914/6356/5071/5176/1812/183/5582/3973/4803/1813/7436/4776/1959/7991/5021/1141/…
GO:1901890	BP	positive regulation of cell junction assembly	104	0.561811	1.64887	6.23964e-08	2.70536e-06	2.00968e-06	5173	tags=60%, list=28%, signal=43%	6422/4653/26050/22871/22865/9378/577/57633/23768/347730/139065/4915/5789/10979/8128/79953/575/23316/84189/84631/869/54413/7058/11141/7010/158038/4914/183/64084/54674/94030/5021/6910/7122/57555/27286/26045/1307/7476/149461/57463/857/9746/347731/114798/51738/2895/23767/59272/4867/8829/80823/7070/3791/26047/347902/2047/40/1946/9076/6093/9647
GO:0043410	BP	positive regulation of MAPK cascade	473	0.431955	1.34278	6.34451e-08	2.73554e-06	2.0321e-06	7046	tags=55%, list=38%, signal=35%	9464/4916/3479/116/6363/2255/3356/392255/10178/367/6366/2247/120892/9607/2690/168667/4920/115352/155/3815/2322/9590/1991/4915/6358/59/388121/10979/284/2066/9770/3082/220164/9365/5294/85458/148/238/5979/5322/1236/10371/1000/7057/5788/388325/2852/22881/5156/3481/4852/2043/154/151306/55024/6360/2260/7043/7010/55816/4914/60401/6356/23533/1880/10333/6091/948/10457/3357/1813/9479/80310/6899/389658/1464…
GO:0008037	BP	cell recognition	155	0.511601	1.53647	6.44937e-08	2.76539e-06	2.05427e-06	4925	tags=50%, list=26%, signal=37%	1268/55118/6363/7275/6900/6366/63923/2042/57453/4685/2596/81035/152330/91624/721/79937/4692/5322/1236/10371/575/128434/1794/2043/1047/23022/56130/6091/948/81704/1462/23705/6092/56253/10666/49/56141/1826/2350/1949/100423062/5175/4978/5806/57463/50863/7455/3543/923/375033/2219/27255/4478/259197/64581/7852/30835/78989/144321/246777/921/283471/8829/284359/10332/30815/64221/2290/9037/133418/84868/1954…
GO:0005604	CC	basement membrane	94	0.568389	1.6565	6.55424e-08	2.79492e-06	2.0762e-06	6225	tags=70%, list=33%, signal=47%	7060/83872/158326/151887/1285/2192/1286/64094/1295/22854/26033/3908/23671/1288/9423/1287/1296/341640/2200/375567/7078/4917/9510/7058/2335/5176/667/8292/1297/3910/79812/30008/3339/84628/59277/55214/1306/80144/3915/126147/4811/166752/1289/8577/64093/22795/3911/340706/4016/1284/3913/3912/43/6678/1946/80781/22798/1955/27283/1282/7045/55914/255743/1280/7399/133584
GO:0051899	BP	membrane depolarization	81	0.584533	1.68892	7.18343e-08	3.04648e-06	2.26308e-06	3098	tags=47%, list=17%, signal=39%	6332/477/4653/287/6327/2273/11280/120892/6330/783/55800/6328/8912/775/1634/781/6326/6546/3757/8973/8913/6335/1258/6331/596/6329/6910/1141/10021/5027/6323/8911/10962/6324/135/857/6334/2697
GO:0051924	BP	regulation of calcium ion transport	239	0.477949	1.45736	7.9175e-08	3.33955e-06	2.48079e-06	4734	tags=45%, list=25%, signal=34%	477/845/5354/287/5350/57158/117/4842/4638/844/9472/1756/22953/115352/785/6262/7220/783/65267/5587/775/930/5294/781/57338/84502/6546/6387/5999/2852/3603/5957/2916/9104/6236/5023/2669/6622/1193/8832/1812/825/183/3718/5311/596/1813/2946/816/4987/28954/6769/815/5336/7222/786/30845/5159/5027/57165/2149/59285/2641/5142/6376/135/187/1950/857/5026/4985/117532/9002/7852/799/54106/7439/945/3306/3270/9001/1…
GO:0002027	BP	regulation of heart rate	101	0.557848	1.63207	9.70022e-08	4.04749e-06	3.00668e-06	5413	tags=56%, list=29%, signal=40%	845/287/5350/6327/29119/1756/11149/6330/6262/3741/783/64091/55800/775/148/781/23704/10371/6546/5999/3757/55328/1909/57731/3762/552/80763/8913/6331/183/1813/3752/10021/3670/1910/146/6324/857/186/7442/3753/3270/81033/7168/5144/1908/859/51086/1906/4878/776/23493/2034/6640/6505/147/23630
GO:0060485	BP	mesenchyme development	284	0.460105	1.41185	9.70022e-08	4.04749e-06	3.00668e-06	5483	tags=49%, list=29%, signal=35%	6422/9464/72/6423/26585/2255/55273/54796/223117/2042/221662/55698/23414/147906/9723/2487/2316/59/10736/10979/4139/2066/202151/8854/3082/70/90102/4208/4222/5979/2295/9241/2294/10371/1000/753/8320/25937/6943/1909/2043/80031/7049/6608/2260/7043/26508/56920/54756/8828/2335/8642/6091/5311/2254/3357/10439/596/8929/6092/6899/6910/7042/7074/57556/10500/3670/1910/5159/7041/2303/57057/130497/2668/10512/544…
GO:0035418	BP	protein localization to synapse	67	0.61314	1.74677	1.01197e-07	4.19994e-06	3.11993e-06	3303	tags=48%, list=18%, signal=39%	22871/5649/4884/22865/9378/9211/2903/347730/9379/158866/6616/3798/1740/10082/27445/4130/4137/50944/3800/8927/5913/4868/23426/57555/59284/7476/1742/160622/51201/9746/112755/80852
GO:0086010	BP	membrane depolarization during action potential	35	0.708147	1.92069	1.16978e-07	4.80354e-06	3.56832e-06	3037	tags=69%, list=16%, signal=57%	6332/477/287/6327/11280/6330/783/55800/6328/8912/775/781/6326/6546/3757/8913/6335/6331/6329/10021/6323/8911/6324/6334
GO:0008076	CC	voltage-gated potassium channel complex	78	0.585377	1.68984	1.16978e-07	4.80354e-06	3.56832e-06	5666	tags=73%, list=30%, signal=51%	3745/3778/3736/3776/1804/30820/56479/57628/3788/3779/3741/3737/3738/3755/170850/219527/3757/3739/3762/3750/3751/3746/3787/3790/3752/10021/9312/3764/3780/3773/10242/3763/3756/9132/30818/23415/27094/126755/3753/7881/30819/3754/3748/3743/27345/169522/3758/9196/26047/3747/80333/610/27012/26251/23630/3785/8514
GO:0050673	BP	epithelial cell proliferation	391	0.436616	1.35062	1.19086e-07	4.86435e-06	3.61349e-06	5080	tags=41%, list=27%, signal=30%	7060/6422/7432/4804/185/3479/6423/2255/5241/1285/2252/6869/367/1295/2247/168667/9420/3815/2735/2099/2277/196740/1296/3488/5587/4163/8854/10000/3082/2719/55679/51146/4208/4825/654/9241/7057/6387/8200/9104/3481/151306/7857/26051/23213/7049/6608/5764/2260/135228/4856/2138/7010/8828/3690/5797/2191/6356/197358/5176/6091/3676/687/6331/2254/3357/6899/5314/5293/7042/114821/3487/84913/3670/8626/387837/191…
GO:0030336	BP	negative regulation of cell migration	268	0.46829	1.43389	1.21194e-07	4.92453e-06	3.65819e-06	5244	tags=48%, list=28%, signal=35%	6422/4804/9353/340533/1545/6423/26585/93649/347/4223/127435/6366/63923/11122/89795/2247/1809/482/23671/26228/3488/8434/9370/4163/5592/1634/10563/90102/4208/10718/9241/10371/753/7057/575/6387/1524/9750/3036/9863/2043/80031/23213/4856/493/11117/8646/22914/5797/51466/5176/6091/596/1813/6910/1281/131450/10395/25932/126820/54328/7122/6833/79772/79812/25817/4286/89927/11240/4838/149461/2841/6376/104/24…
GO:0019838	MF	growth factor binding	138	0.52593	1.56659	1.31732e-07	5.32486e-06	3.95557e-06	5182	tags=54%, list=28%, signal=39%	2045/4804/4916/2690/8839/2322/4052/4915/124857/3488/3977/2/10563/9365/347252/4053/7057/3554/5156/7049/2260/135228/7043/4856/8828/3690/4914/3587/948/6331/2615/1281/8840/3487/5159/3572/4054/27286/1490/3489/8425/4036/3490/3590/375387/3570/199713/1278/9001/7048/1289/9180/94031/3581/8829/2263/2324/203100/57045/3486/3491/2321/3559/3791/94/114990/7046/1291/3560/2022/7837/51232/3480/3685
GO:0006814	BP	sodium ion transport	244	0.47345	1.44482	1.35947e-07	5.46678e-06	4.061e-06	7149	tags=61%, list=38%, signal=38%	6332/477/1272/6327/4842/2259/11280/259232/55117/1756/482/6330/60482/6543/53826/5348/57030/57419/55800/6328/65267/154215/285195/8912/6547/28968/6326/480/6546/2258/1909/6559/154/57731/123041/493/246213/8913/6527/6530/6335/151258/6331/5311/6557/5270/1813/6329/26249/486/7402/53822/10021/125206/115584/26266/1910/5027/5187/6532/130497/6323/8911/201780/6324/345274/160728/6338/57282/83697/2040/1760/6334/…
GO:0001518	CC	voltage-gated sodium channel complex	17	0.812828	2.01402	1.37736e-07	5.51016e-06	4.09323e-06	3037	tags=94%, list=16%, signal=79%	6332/6327/11280/6330/55800/6328/8912/6326/8913/6335/6331/6329/6323/8911/6324/6334
GO:0034767	BP	positive regulation of ion transmembrane transport	159	0.506922	1.52487	1.4227e-07	5.66236e-06	4.20629e-06	6780	tags=62%, list=36%, signal=40%	5354/287/5649/88/3736/57158/4842/844/9472/1756/482/27092/3779/6262/7220/783/5348/644139/2316/65267/930/5243/781/2852/219527/54413/3757/1909/9104/154/729230/5023/6622/6000/1812/825/183/5311/3746/2946/486/6769/5336/6833/30845/5027/57165/2149/6376/57463/187/9002/85358/126755/799/3753/3306/9001/10268/1080/59272/342667/7225/4283/30819/623/1908/6347/1906/4878/7070/5174/3747/10345/54209/3596/5335/4923/3…
GO:0070252	BP	actin-mediated cell contraction	98	0.558614	1.63149	1.46486e-07	5.77095e-06	4.28695e-06	4604	tags=52%, list=25%, signal=39%	477/287/5350/6327/29119/6330/6444/6262/3741/783/55800/2316/59/775/70/781/23704/2258/3757/10052/122786/3762/8913/6331/3752/10021/3764/4620/4626/6323/5142/6324/54749/857/2697/22998/3753/4621/2934/2702/7168/5144/859/4607/55742/2257/5290/776/10630/3781/134
GO:0051271	BP	negative regulation of cellular component movement	291	0.461036	1.41611	1.46486e-07	5.77095e-06	4.28695e-06	5244	tags=47%, list=28%, signal=34%	6422/4804/9353/340533/1545/6423/26585/93649/347/4223/2192/127435/6366/63923/11122/89795/2247/1809/482/23671/26228/3488/8434/9370/4163/5592/1634/10563/90102/4208/10718/9241/10371/753/7057/575/6387/1524/9750/3036/9104/9863/2043/80031/23213/7049/4856/493/11117/8646/22914/5797/51466/5176/6091/596/1813/6910/5314/1281/131450/10395/50859/25932/126820/54328/7122/6833/79772/79812/25817/4286/89927/11240/48…
GO:0090092	BP	regulation of transmembrane receptor protein serine/threonine kinase signaling pathway	253	0.46845	1.43169	1.71778e-07	6.73317e-06	5.00174e-06	5481	tags=47%, list=29%, signal=34%	91851/64388/6422/8483/651/56963/6424/6423/26585/2255/93649/2662/392255/7044/151449/494470/23089/168667/348093/8516/23090/4052/54829/222223/124857/168002/6935/2200/375567/23111/2719/3547/9839/654/9241/753/7057/6425/8200/9863/23213/7049/135228/7043/4856/11117/8646/54756/222663/11167/2254/25928/7471/7042/7041/3175/57057/65997/4838/199699/1149/286204/9856/8425/653/4036/857/4035/164656/9573/375387/110…
GO:1904851	BP	positive regulation of establishment of protein localization to telomere	10	-0.828699	-2.82728	1.74311e-07	6.79815e-06	5.05001e-06	3196	tags=100%, list=17%, signal=83%	908/10575/55135/10576/10694/7203/22948/10574/1736
GO:0000276	CC	mitochondrial proton-transporting ATP synthase complex, coupling factor F(o)	10	-0.827193	-2.82214	1.85855e-07	7.21211e-06	5.35752e-06	3224	tags=100%, list=17%, signal=83%	522/515/539/10632/517/10476/518/521/516
GO:0030315	CC	T-tubule	51	0.642753	1.80081	2.07609e-07	8.01617e-06	5.95481e-06	2726	tags=55%, list=15%, signal=47%	477/287/844/9472/27092/6517/783/5348/775/113146/148/781/6326/6546/361/7043/493/6331/825/5962/6769/786/6323/90342/59284/59285/779/6324
GO:0098839	CC	postsynaptic density membrane	89	0.564243	1.64035	2.18168e-07	8.34088e-06	6.19603e-06	3512	tags=52%, list=19%, signal=42%	22866/2045/22865/2901/401190/2890/729993/2903/57689/145581/22986/27092/1740/57537/57502/2894/9890/491/2066/8787/775/79953/2891/1630/2043/5802/388336/64084/94030/53616/8825/1949/59284/26045/1742/107/3756/9746/4985/347731/114798/22829/2895/112476/2911/64101
GO:0001503	BP	ossification	401	0.43659	1.35097	2.18168e-07	8.34088e-06	6.19603e-06	6394	tags=49%, list=34%, signal=33%	91851/6422/25884/9464/4958/651/4653/3479/340419/7704/6423/285313/26585/1311/2662/5179/4330/6096/4256/6869/63923/2247/4921/4920/2735/2737/54829/57419/3488/10736/4057/10979/5587/4880/202151/9770/3082/2719/9365/50846/4208/5745/2822/117581/654/9241/6546/658/25937/3371/8200/3481/338773/154/6608/1009/5764/2550/7043/2736/89/8646/4325/222663/3199/5087/8642/1901/1462/2254/2824/596/645811/1959/10143/5744/7…
GO:0050920	BP	regulation of chemotaxis	218	0.476019	1.44698	2.47821e-07	9.42812e-06	7.00368e-06	6415	tags=56%, list=34%, signal=37%	7060/9353/4916/26585/6363/2255/91584/223117/64094/6366/2247/64805/9723/2277/1991/26228/5587/10563/1233/83700/1236/10371/245937/7057/6387/6585/3603/1524/9750/5156/80031/7857/25960/5764/2260/729230/4856/3071/56920/22914/57118/1880/1901/6091/80310/6092/146433/6504/56670/57556/10500/1826/5159/11240/10512/1240/54437/347733/2841/7424/1436/3592/100528032/8823/3570/7852/719/2246/1235/659/8740/6480/23075/…
GO:0004896	MF	cytokine receptor activity	97	0.555451	1.62231	2.56293e-07	9.70288e-06	7.20779e-06	5192	tags=62%, list=28%, signal=45%	2674/643/2840/2690/2676/2322/2675/3977/1233/1236/3568/2829/64109/9244/3953/1524/3554/729230/54756/9173/3587/1439/26280/133396/1237/3575/1234/10803/3572/1240/3593/1438/400935/8322/2826/10148/3590/1238/3570/7852/116379/10936/50615/9180/1235/8809/3581/920/4352/3594/1271/8807/1230/3595/3559/149233/3563/3560/10663/57007
GO:0051588	BP	regulation of neurotransmitter transport	97	0.555103	1.6213	2.64765e-07	9.97497e-06	7.40991e-06	5520	tags=59%, list=30%, signal=42%	1268/477/22871/22999/3356/4842/120892/1136/5579/6865/6860/783/140730/23208/4208/148/2852/5023/6857/3690/8973/6622/5071/9627/1812/5582/2824/1813/815/1143/79772/9783/5028/2668/5413/7476/6623/320/135/107/8564/112755/2670/23621/116443/10814/27345/6853/150/1142/9498/5217/84961/3688/8938/5030/6855
GO:0050806	BP	positive regulation of synaptic transmission	145	0.509731	1.52313	2.85946e-07	1.07209e-05	7.96403e-06	3464	tags=43%, list=19%, signal=36%	1268/22871/5649/22999/9378/9211/6869/2903/347730/7143/3908/152404/6543/27092/4920/6865/6616/11170/4915/783/10590/6547/148/2898/2852/4355/57616/1524/54413/2043/5764/729230/9699/1395/6857/4914/6622/5913/10858/1812/5270/64084/5582/1813/4776/5021/2695/57555/9783/59284/26045/1742/135/107/5924/51201/8564/9746/112755/85358/2670/9001/9495
GO:0050770	BP	regulation of axonogenesis	154	0.500288	1.50127	3.28308e-07	1.225e-05	9.09991e-06	5650	tags=54%, list=30%, signal=38%	2045/9353/91584/6900/4747/223117/7143/57689/4135/3897/5063/57611/9423/9723/140578/4915/8153/4131/4137/23111/85458/5979/10371/1000/4133/6387/2258/6585/1630/2043/80031/1600/5802/10154/56920/2335/6091/4803/6092/7074/57556/10500/4168/4099/1826/23566/10512/1949/54437/3792/7476/9024/57463/10090/9856/27185/23499/51199/114798/9706/1123/659/84446/5365/8829/7224/8831/6792/9037/1002/7070/1954/22902/1946/649…
GO:0044306	CC	neuron projection terminus	126	0.524123	1.55747	3.41016e-07	1.26633e-05	9.40693e-06	5890	tags=59%, list=32%, signal=40%	11341/3736/2901/5179/3776/63923/120892/1756/5579/6543/2899/440279/6572/3737/4915/3738/10590/6547/5122/85458/5368/7345/1393/6546/2898/2852/4852/6506/2043/246213/1395/6857/8927/6622/23769/5582/3746/1813/9256/6571/1006/4922/29993/1742/23157/6623/57282/4919/4985/114131/112476/5798/23767/23025/846/10814/284697/6570/134/796/150/3747/553/9498/8867/4923/6505/22848/7287/6855/5020/2752/5621/4983
GO:0086091	BP	regulation of heart rate by cardiac conduction	38	0.669458	1.82582	3.49489e-07	1.29161e-05	9.59473e-06	3465	tags=55%, list=19%, signal=45%	287/6327/29119/6330/3741/783/55800/775/781/23704/3757/3762/8913/6331/3752/10021/3670/6324/857/3753/81033
GO:0032956	BP	regulation of actin cytoskeleton organization	342	0.441655	1.36068	3.57961e-07	1.31665e-05	9.78075e-06	5456	tags=42%, list=29%, signal=30%	6422/171024/4653/9353/4916/25802/88/119/10178/6869/6366/2042/2006/7111/23671/130271/5063/84952/9723/11170/10810/54551/23500/26228/2316/8153/80206/10979/90102/10391/85458/22843/50944/83700/1236/79822/6840/81553/6387/5999/5156/1073/57731/7043/3071/2044/55243/7010/1496/6356/51466/5071/1901/395/4868/10602/2824/29767/5962/1902/146206/56203/10395/11346/126820/91807/5159/1490/54959/246/399/6708/6376/847…
GO:0061138	BP	morphogenesis of a branching epithelium	181	0.487309	1.47123	3.62197e-07	1.32595e-05	9.84982e-06	3965	tags=38%, list=21%, signal=30%	6422/9353/84870/340419/6423/26585/2255/5241/2252/367/2247/151449/64478/64399/9723/2737/2099/7484/7482/10736/3082/2719/9241/2294/10371/6943/1909/23213/6608/2736/2138/5087/6356/8642/183/5311/596/4776/5314/7471/25932/8626/2303/57057/2668/5727/170690/10512/7475/59277/80000/51176/1950/186/7052/5310/3586/7075/2246/7048/54922/30812/3911/4855/8829/3202/2263/859/846
GO:0005248	MF	voltage-gated sodium channel activity	24	0.749862	1.94924	3.81045e-07	1.3884e-05	1.03137e-05	3037	tags=79%, list=16%, signal=66%	6332/6327/11280/259232/6330/55800/6328/8912/6326/8913/6335/6331/5311/6329/10021/6323/8911/6324/6334
GO:0050678	BP	regulation of epithelial cell proliferation	330	0.444097	1.36702	3.87614e-07	1.40574e-05	1.04425e-05	5080	tags=42%, list=27%, signal=31%	7060/6422/7432/4804/185/3479/6423/2255/5241/1285/2252/6869/367/2247/9420/2735/2277/5587/4163/8854/10000/2719/55679/51146/4208/654/9241/7057/6387/8200/9104/3481/151306/7857/26051/23213/7049/6608/5764/2260/135228/2138/7010/8828/3690/5797/6356/197358/5176/6091/3676/687/6331/2254/3357/6899/5314/5293/7042/114821/84913/3670/8626/1910/79812/8013/130497/5727/120425/7480/7476/4838/54959/3593/7424/79805/83…
GO:0015081	MF	sodium ion transmembrane transporter activity	150	0.506066	1.51452	4.00323e-07	1.44507e-05	1.07347e-05	7224	tags=71%, list=39%, signal=44%	6332/477/6327/2901/11280/259232/55117/6330/60482/6543/2899/57030/57419/55800/6328/285195/8912/6547/6326/480/6546/2898/6559/6506/123041/8913/6527/6530/6512/6335/2900/6331/5311/6557/6329/10021/125206/115584/6571/26266/2897/6532/6323/8911/6511/201780/6324/345274/160728/6338/57282/83697/6334/9058/285335/200010/6555/6507/9154/357/9963/6554/159963/25769/6531/55515/6561/6529/389015/6570/9962/10786/40/86…
GO:0005911	CC	cell-cell junction	492	0.421158	1.31128	4.08795e-07	1.46882e-05	1.09112e-05	6129	tags=43%, list=33%, signal=30%	1674/477/57863/28513/4804/287/1501/23336/5239/11155/83872/5101/29119/117/23768/6442/23114/10580/9472/11149/6330/152404/8777/79827/27295/84952/58494/3815/1008/91624/3741/3737/84623/5010/5348/9071/2316/65267/83604/10979/5587/26025/8506/55679/6326/154810/83700/3702/23284/1000/6546/575/2258/220296/4355/387357/23037/57493/9863/2043/10052/1009/64405/57731/7223/4856/387597/122786/23363/23136/55243/7010/…
GO:0051966	BP	regulation of synaptic transmission, glutamatergic	68	0.595212	1.69802	4.13031e-07	1.47721e-05	1.09734e-05	3835	tags=57%, list=21%, signal=46%	1268/477/22871/5649/3356/9378/7143/120892/27092/4920/2899/9890/9162/4208/1000/2898/57616/54413/2916/729230/6857/4914/1812/2913/5270/1813/5021/57555/2897/59284/135/27185/8564/85358/22943/2911/2914/2917/23025
GO:1902414	BP	protein localization to cell junction	96	0.554852	1.62037	4.17267e-07	1.47873e-05	1.09847e-05	3455	tags=41%, list=19%, signal=33%	22871/5649/4884/22865/9378/9211/2903/347730/9379/158866/6616/3798/84952/1740/10082/27445/4130/10979/4137/50944/83700/57493/3800/8927/5913/4868/23426/57555/59284/5175/7476/1742/160622/51201/9746/112755/143098/80852/1003
GO:0007613	BP	memory	122	0.517675	1.53653	4.17267e-07	1.47873e-05	1.09847e-05	4977	tags=52%, list=27%, signal=39%	1268/4593/5649/3356/2890/3776/139411/6869/2903/22986/6543/64478/8516/6860/266743/6517/4130/4137/23208/1620/6547/50944/6326/57338/814/23316/2258/1524/5764/5176/1812/4803/1813/7436/4776/5021/1141/2695/1621/57144/6833/9486/5923/6532/107/23236/85358/4009/6310/4909/6285/9867/3678/164312/143941/25769/114/6529/338811/729956/81832/348/54209/54207
GO:0015844	BP	monoamine transport	82	0.572666	1.65613	4.21504e-07	1.48022e-05	1.09958e-05	5161	tags=63%, list=28%, signal=46%	1268/3745/7432/3356/4842/9607/6860/3737/83849/23208/148281/6387/143425/1113/341359/2550/5023/6857/3690/8973/6622/6530/5071/1812/183/2824/1813/4129/5021/1141/1133/84258/6571/5028/127833/6532/2668/6623/135/10859/26281/6581/6531/18/6570/150/151/2912/1137/6582/57586/222962
GO:0018212	BP	peptidyl-tyrosine modification	364	0.438143	1.35269	4.21504e-07	1.48022e-05	1.09958e-05	6580	tags=50%, list=35%, signal=33%	7060/6422/4593/1272/2045/4916/3479/2674/5649/6423/26585/2255/3356/2252/2042/2202/285220/2690/640/4921/4920/3815/2322/4915/26228/9370/284/2066/3082/660/148/238/5979/85480/654/1795/3702/5788/9244/695/5156/3481/2043/55024/2260/2044/7010/3690/4914/147746/948/183/3718/8995/80310/389658/146433/5168/133396/558/5336/3670/5159/9467/494551/3572/2051/7273/5175/1464/3645/64092/1742/1489/3593/7535/7448/57091/…
GO:0030048	BP	actin filament-based movement	128	0.517692	1.53838	4.2574e-07	1.48836e-05	1.10563e-05	4604	tags=47%, list=25%, signal=36%	477/287/5350/6327/29119/6330/6444/6262/3741/783/55800/2316/59/775/70/781/4628/23704/2258/3757/10052/283446/122786/3762/8913/6331/7456/4644/644150/3752/10021/3764/4620/4626/6323/5142/6324/51168/54749/857/2697/22998/64005/3753/4621/4542/2934/2702/7168/7454/5144/859/4607/55742/2257/5290/776/10630/3781/134
GO:0086003	BP	cardiac muscle cell contraction	70	0.594932	1.70386	4.3849e-07	1.52606e-05	1.13364e-05	4604	tags=56%, list=25%, signal=42%	477/287/5350/6327/29119/6330/6444/6262/3741/783/55800/2316/775/781/23704/2258/3757/10052/3762/8913/6331/3752/10021/3764/6323/5142/6324/857/2697/3753/2934/2702/5144/859/2257/5290/776/3781/134
GO:0045055	BP	regulated exocytosis	232	0.470019	1.43255	4.98089e-07	1.72574e-05	1.28197e-05	5520	tags=49%, list=30%, signal=35%	1268/3745/22871/22999/3356/2901/120892/640/5579/6616/440279/3815/6860/5730/783/27445/140730/8912/9145/83849/23208/5294/148/148281/1393/2294/143425/695/1113/341359/729230/9699/5023/3071/6857/8973/8913/116449/6622/9900/6854/8618/8832/1812/284021/5582/1813/11031/2213/5293/84258/57126/10125/8941/7166/9783/5027/8013/5028/127833/8911/5729/5413/7476/3684/320/84106/135/2623/107/8447/27040/112755/8676/260…
GO:0034764	BP	positive regulation of transmembrane transport	207	0.482146	1.46241	5.06603e-07	1.74744e-05	1.29809e-05	6780	tags=58%, list=36%, signal=38%	5354/287/3479/5649/88/3736/57158/4842/844/10580/9472/1756/482/27092/3779/6262/7220/718/783/5348/25999/644139/2316/65267/9370/930/2719/5243/781/2852/219527/54413/3757/1909/9104/6506/154/729230/5023/28999/6622/6000/1812/825/183/5311/3746/2946/486/6769/2695/5336/6833/30845/5027/8013/57165/2149/6376/57463/113451/187/9002/85358/126755/799/3667/3753/3306/9001/10268/1080/59272/342667/7225/4283/4205/3081…
GO:0018108	BP	peptidyl-tyrosine phosphorylation	361	0.440358	1.35901	5.15117e-07	1.76895e-05	1.31406e-05	6580	tags=50%, list=35%, signal=33%	7060/6422/4593/1272/2045/4916/3479/2674/5649/6423/26585/2255/3356/2252/2042/2202/285220/2690/640/4921/4920/3815/2322/4915/26228/9370/284/2066/3082/660/148/238/5979/85480/654/1795/3702/5788/9244/695/5156/3481/2043/55024/2260/2044/7010/3690/4914/147746/948/183/3718/8995/80310/389658/146433/5168/133396/558/5336/3670/5159/9467/494551/3572/2051/7273/5175/1464/3645/64092/1742/1489/3593/7535/7448/57091/…
GO:1904064	BP	positive regulation of cation transmembrane transport	144	0.508983	1.52031	5.49174e-07	1.86936e-05	1.38865e-05	6780	tags=64%, list=36%, signal=41%	5354/287/5649/88/3736/57158/4842/844/9472/1756/482/27092/3779/6262/7220/783/5348/644139/2316/65267/930/781/2852/219527/54413/3757/1909/9104/154/729230/5023/6622/6000/1812/825/183/5311/3746/2946/486/6769/5336/6833/30845/57165/2149/6376/57463/187/9002/85358/126755/799/3753/3306/9001/10268/59272/342667/4283/30819/623/1908/6347/1906/4878/7070/5174/3747/10345/54209/3596/5335/4923/388591/23630/6375/288…
GO:0008217	BP	regulation of blood pressure	180	0.490255	1.4795	5.49174e-07	1.86936e-05	1.38865e-05	5052	tags=50%, list=27%, signal=37%	1268/477/185/4886/1511/4842/6869/367/2982/9607/22953/4883/155/1215/1359/2740/59/9370/554/9365/10391/148/206338/55328/1909/4852/1113/154/10699/5023/4881/552/1816/80763/255061/29953/183/1813/257313/5021/4987/56670/6866/5443/1910/2149/2837/170690/146/4882/7424/2784/290/186/83988/89797/7442/80852/5742/1278/81285/947/2702/7168/659/3952/59272/59342/6915/623/5144/1908/6518/6196/2028/18/1906/10266/4878/1…
GO:0150034	CC	distal axon	267	0.456104	1.39668	5.57688e-07	1.89005e-05	1.40403e-05	6496	tags=53%, list=35%, signal=35%	1268/4804/11075/5101/3736/2901/5179/4747/3776/347730/63923/2823/120892/1809/2596/5579/6543/3897/6616/2899/440279/6572/3737/4915/3738/2316/4131/4137/10590/85300/6547/5122/85458/322/5368/57451/1393/81551/6546/2898/4133/2258/2852/57616/24141/1630/1996/4852/2043/140767/23022/5802/3800/246213/1395/6622/9638/91752/3676/5582/10439/3746/1813/8633/4644/9256/6571/8941/1400/1006/7786/1826/5923/4922/5727/299…
GO:1903169	BP	regulation of calcium ion transmembrane transport	146	0.507095	1.51553	5.91745e-07	1.99675e-05	1.48329e-05	5246	tags=50%, list=28%, signal=36%	477/845/5354/287/5350/57158/4842/844/9472/1756/785/6262/7220/783/5587/775/930/5294/781/57338/84502/6546/2852/9104/6236/5023/2669/6622/1193/1812/825/5311/1813/2946/4987/28954/6769/5336/786/30845/57165/2149/59285/5142/6376/187/117532/9002/799/54106/3306/3270/9001/79026/10268/342667/4283/623/5144/2534/859/10681/117531/11151/4878/7070/150/10345/3596/5335/4923/1394/91404
GO:0030246	MF	carbohydrate binding	266	0.45642	1.39744	6.08773e-07	2.04532e-05	1.51937e-05	4508	tags=40%, list=24%, signal=31%	1272/57452/158326/6403/6900/946/388512/933/26033/2208/165530/81035/10216/64409/721/10462/140578/5507/114805/114780/23284/9936/143903/50489/6441/23266/117248/402635/154790/6614/27181/22914/969/29121/160364/1462/170482/1117/283420/6402/10219/10143/5168/49/1621/6401/7123/4099/339390/387837/1178/22925/26290/342372/9902/4360/89790/51348/7448/131544/5806/55214/9976/2219/971/100528032/433/22918/64581/51…
GO:0070661	BP	leukocyte proliferation	314	0.445706	1.37053	6.59858e-07	2.2074e-05	1.63976e-05	4962	tags=42%, list=27%, signal=32%	1380/931/3479/26585/6363/2255/933/6869/640/4004/202309/1378/4883/115352/90865/23495/3815/2322/5169/930/26279/5294/4208/944/973/115650/3568/5788/695/3481/1794/6441/22806/729230/940/3071/912/952/7412/1880/959/10457/81704/3718/1439/8995/596/9479/1191/146433/56253/2615/2213/6504/1141/10125/4064/3575/8654/339390/1178/5027/54440/3572/80380/6693/3593/6708/7535/6376/1438/64926/7099/3567/472/51176/1436/92…
GO:1904874	BP	positive regulation of telomerase RNA localization to Cajal body	15	-0.710189	-2.79172	7.51331e-07	2.50261e-05	1.85906e-05	5403	tags=100%, list=29%, signal=71%	55164/6950/908/10575/10576/8607/10694/7203/22948/10574/55505/10856/1736/55651
GO:0099146	CC	intrinsic component of postsynaptic density membrane	54	0.62402	1.75663	7.70542e-07	2.55563e-05	1.89845e-05	3943	tags=63%, list=21%, signal=50%	2045/22865/2901/401190/2890/729993/2903/57689/145581/22986/27092/2894/9890/491/2066/1630/5802/388336/64084/94030/53616/1949/59284/26045/1742/107/9746/4985/347731/114798/2895/64101/146395/116443
GO:0097305	BP	response to alcohol	228	0.466809	1.42242	7.79056e-07	2.57288e-05	1.91126e-05	5531	tags=45%, list=30%, signal=32%	1268/6422/111/9353/4916/1545/6363/1036/5563/117/5179/1066/4747/6869/2903/6366/108/6586/5737/3779/266743/6517/9370/4880/2/2822/1236/1393/5999/7049/6608/2550/552/7412/6000/687/1813/1582/4129/1141/1621/11184/1234/7122/5727/939/5729/54331/5997/1536/107/2625/3490/7292/114131/94241/4988/7048/1080/3952/6915/3709/2770/2354/6480/113/2263/2534/116443/3558/6554/23209/2660/7040/2741/114/8647/6531/2796/18/215…
GO:0046928	BP	regulation of neurotransmitter secretion	84	0.563365	1.63162	8.38656e-07	2.74908e-05	2.04215e-05	5520	tags=60%, list=30%, signal=42%	1268/22871/22999/3356/120892/1136/5579/6865/6860/783/140730/23208/4208/148/2852/5023/6857/8973/6622/5071/9627/1812/5582/1813/815/1143/79772/9783/5028/5413/7476/6623/320/135/107/8564/112755/23621/116443/10814/27345/6853/150/1142/9498/5217/84961/8938/5030/6855
GO:0099068	BP	postsynapse assembly	29	0.711035	1.88114	8.39495e-07	2.74908e-05	2.04215e-05	3315	tags=69%, list=18%, signal=57%	4916/22871/4884/22865/9378/9379/2596/57502/5789/1000/869/54413/94030/57555/26045/7476/84628/85358/22829/2895
GO:0099173	BP	postsynapse organization	159	0.494381	1.48715	8.81311e-07	2.87389e-05	2.13487e-05	5890	tags=52%, list=32%, signal=36%	22866/4593/2045/1501/4916/22871/5649/4884/22865/9378/4747/9379/120892/158866/2596/547/5063/9118/8499/57502/5789/2743/8506/50944/4744/1000/23316/55619/869/54413/2043/22891/388336/11141/8828/5913/91752/66000/94030/816/2213/8292/57555/2668/26045/7476/1742/84628/375323/26052/58504/51201/85358/51738/22829/2895/64101/5552/8829/2534/51086/8831/6792/26115/80823/2904/10288/729956/2047/348/65981/54209/1015…
GO:0044853	CC	plasma membrane raft	113	0.524926	1.552	8.98423e-07	2.90528e-05	2.15819e-05	5428	tags=56%, list=29%, signal=40%	5740/477/931/3778/729085/3356/117/119/10580/120892/9472/11149/1136/1378/8436/3741/5348/148/1000/6608/4118/7223/493/3751/948/6331/284119/1141/10395/57126/6401/2149/5727/30846/3684/925/51338/8611/857/3667/3689/7048/659/859/23209/114/6531/657/3037/26509/54209/1946/3937/3055/3480/5657/7035/858/4846/147/4038/147719/867
GO:0001763	BP	morphogenesis of a branching structure	195	0.477511	1.4457	8.98423e-07	2.90528e-05	2.15819e-05	3965	tags=37%, list=21%, signal=30%	6422/2045/9353/84870/340419/6423/26585/2255/5241/2252/367/2247/120892/151449/64478/64399/9723/2737/2099/7484/7482/10736/3082/2719/9241/2294/10371/6943/1909/23213/6608/2736/2138/5087/6356/8642/183/5311/596/1813/4776/5314/7471/25932/8626/2303/57057/2668/5727/170690/10512/7475/59277/80000/51176/53335/1950/186/7052/5310/3586/7075/2246/7048/54922/30812/3911/4855/8829/3202/2263/859/846
GO:0016528	CC	sarcoplasm	78	0.566679	1.63586	9.4976e-07	3.05854e-05	2.27204e-05	3644	tags=42%, list=20%, signal=34%	7060/845/5350/57158/4842/844/10335/9472/6444/202333/6262/6695/6517/6263/6547/4208/781/57338/84502/3708/7057/10324/417/2946/816/6261/6345/123722/55214/1760/3270/2934/3709
GO:0043266	BP	regulation of potassium ion transport	100	0.539414	1.57695	9.66872e-07	3.10078e-05	2.30342e-05	5666	tags=60%, list=30%, signal=42%	845/7432/287/88/3736/3356/4842/2273/1804/30820/9472/57628/482/3788/3779/3741/3755/2316/65267/23704/5999/219527/3757/6000/1812/3746/1813/3787/486/6833/3792/57463/857/30818/126755/3753/2645/7881/30819/1908/859/4734/4878/776/3781/134/9196/81832/54800/150/3747/80333/54209/388591/4846/3688/23630/288/144245/8514
GO:0070382	CC	exocytic vesicle	213	0.467841	1.42087	9.83985e-07	3.14268e-05	2.33454e-05	4004	tags=38%, list=22%, signal=30%	9892/3479/5179/2890/2903/115827/11037/9899/120892/1809/6616/440279/284612/6860/114088/84623/57030/8224/9145/83849/23208/9162/273/83992/148281/79953/22987/203190/143425/24141/341359/2550/5802/246213/6857/8927/6622/9900/9627/6854/4803/22895/1813/142684/84258/55530/6571/6833/79772/127833/5413/7732/1742/23157/5142/320/27185/5414/7781/2555/4985/112755/132204/8676/112476/23621/9001/5866/51762/321/9381/…
GO:0099174	BP	regulation of presynapse organization	33	0.690266	1.85645	1.0011e-06	3.17123e-05	2.35575e-05	3679	tags=67%, list=20%, signal=54%	26050/4916/22865/145581/139065/5789/10082/84189/84631/869/11141/266727/6622/26280/94030/57555/7476/84628/9746/114798/22943/8321
GO:1905606	BP	regulation of presynapse assembly	33	0.690266	1.85645	1.0011e-06	3.17123e-05	2.35575e-05	3679	tags=67%, list=20%, signal=54%	26050/4916/22865/145581/139065/5789/10082/84189/84631/869/11141/266727/6622/26280/94030/57555/7476/84628/9746/114798/22943/8321
GO:0014065	BP	phosphatidylinositol 3-kinase signaling	138	0.512061	1.52527	1.03532e-06	3.26631e-05	2.42638e-05	5116	tags=51%, list=28%, signal=38%	4653/4916/3479/5649/3356/6403/2247/4920/3815/2322/4915/80243/284/2066/1634/3082/5294/5783/2852/5156/26051/2260/940/7010/4914/2335/23533/197358/183/5270/3357/80310/5293/7042/23026/10125/11126/5159/2149/93492/25827/51384/2625/4919/1950/375033/3059/222950/3667/56034/653361/5343/113791/3952/5342/1411/57624/4734/118788/2268/5295/5290/2321/1906/3791/6352/10385/54209/7291/5288/3480
GO:0099504	BP	synaptic vesicle cycle	181	0.479734	1.44836	1.06955e-06	3.36063e-05	2.49644e-05	3995	tags=41%, list=21%, signal=32%	1268/9892/22871/22999/3356/2901/11037/120892/5579/6616/440279/6860/6517/783/57502/57030/8224/27445/140730/273/148/1000/79953/143425/54413/154664/6456/9699/5023/246213/6857/8973/8927/6622/9900/6854/8618/1812/5582/1813/6571/6457/57555/9783/5027/5028/127833/29993/5413/7476/6623/320/9024/135/107/8447/26052/112755/8676/26059/22829/1759/112476/23621/27253/9751/9381/84446/23025/85439/11069/116443/10814/…
GO:0048015	BP	phosphatidylinositol-mediated signaling	169	0.488347	1.47138	1.17222e-06	3.66839e-05	2.72507e-05	5877	tags=55%, list=32%, signal=38%	4653/4916/3479/5649/3356/6403/2247/4883/4920/3815/2322/4915/644139/80243/284/2066/1634/3082/5294/5783/5334/2852/5156/26051/2260/940/7010/4914/2335/23533/197358/183/5270/3357/80310/5293/7042/23026/10125/11126/5159/2149/93492/25827/51384/2625/4919/1436/3756/1950/375033/23236/3059/222950/23228/3667/56034/653361/5343/113791/3952/5330/5342/1411/84812/57624/4734/118788/2268/5295/5290/2321/1906/3791/635…
GO:0042310	BP	vasoconstriction	81	0.55927	1.61592	1.24067e-06	3.86701e-05	2.87261e-05	5017	tags=62%, list=27%, signal=45%	477/185/3356/1311/6869/3741/3363/10800/59/554/148/6546/1909/5023/552/342527/1816/952/183/3357/5021/1621/4313/3274/1910/2149/10242/6532/146/3792/219537/9732/6338/1131/857/80852/2702/659/3952/59272/6915/1908/846/27345/1906/150/151/553/40/6640
GO:0045785	BP	positive regulation of cell adhesion	436	0.422255	1.30977	1.2749e-06	3.95779e-05	2.94004e-05	6292	tags=49%, list=34%, signal=33%	6422/25890/4653/3479/7704/6423/6363/151887/22915/1511/6403/1295/6366/78986/64805/1378/2737/1991/2199/2316/375567/79625/10979/284/10563/55679/5979/115650/1842/5212/1236/2294/5788/6387/9840/3481/4852/2043/729230/2736/940/3071/11117/8646/7010/912/22914/7412/3111/2335/959/948/3676/81704/3718/8995/6504/7402/7042/10125/54518/6401/3575/11126/10085/8013/2303/54440/3572/1949/939/9806/80380/1307/30008/4838…
GO:0048017	BP	inositol lipid-mediated signaling	173	0.489958	1.47736	1.30912e-06	4.04784e-05	3.00694e-05	5877	tags=55%, list=32%, signal=38%	4653/4916/3479/5649/3356/6403/2247/4883/4920/3815/2322/4915/644139/80243/388121/284/2066/1634/3082/5294/5783/5334/2852/5156/26051/2260/940/7010/4914/2335/23533/197358/183/5270/3357/80310/5293/7042/23026/10125/11126/5159/2149/93492/25827/51384/2625/4919/1436/3756/1950/375033/23236/3059/222950/23228/3667/56034/653361/5343/113791/3952/5330/5342/55803/1411/84812/57624/4734/118788/2268/5295/5290/2321/…
GO:0006942	BP	regulation of striated muscle contraction	91	0.548557	1.59643	1.36046e-06	4.18989e-05	3.11246e-05	4086	tags=43%, list=22%, signal=34%	477/845/287/5350/29119/4842/844/1756/7140/6262/775/6547/5294/148/4634/6546/2258/1113/89/1193/6331/6329/2946/10021/8654/30845/1490/5142/5997/1760/857/3270/2702/59272/5144/859/51086/4607/1482
GO:0071674	BP	mononuclear cell migration	191	0.477084	1.44344	1.37757e-06	4.22582e-05	3.13915e-05	4781	tags=44%, list=26%, signal=33%	9353/26585/6363/347/1511/51676/6366/9420/58494/148823/6358/9023/10563/5294/5979/1236/245937/7057/6387/1524/9750/6360/729230/2838/4856/22914/6356/1880/1901/3676/81704/3683/326/80310/146433/56253/6504/131450/5293/6368/1234/7499/8174/11240/120425/1240/5175/6693/7535/6376/6367/2625/1436/4345/653/3592/100528032/23236/4478/3570/7852/64005/240/719/30009/257144/5340/1235/8740/6357/728/91662/3695/2660/123…
GO:0086001	BP	cardiac muscle cell action potential	72	0.583124	1.67184	1.41179e-06	4.31376e-05	3.20448e-05	5556	tags=60%, list=30%, signal=42%	477/287/6327/29119/1756/6330/6262/3741/783/55800/2316/775/6508/781/9096/23704/6546/2258/3757/10052/3762/8913/6331/3752/10021/3764/6323/6324/857/2697/3753/2702/30819/859/2257/776/3781/6640/7871/610/388591/23630/288
GO:0002250	BP	adaptive immune response	426	0.422053	1.30789	1.44602e-06	4.401e-05	3.26929e-05	7947	tags=61%, list=43%, signal=36%	730/1380/6363/2208/202309/5579/1378/23495/721/10462/718/60468/720/911/913/4063/930/10563/660/716/5294/151888/4208/973/54900/115650/83700/814/83417/89857/3702/974/6095/8320/5788/1524/715/387357/695/3554/710/729230/940/3071/912/50852/22914/3662/114836/9173/3111/1880/959/8832/23180/3718/170482/1439/8995/326/4068/1191/51311/2213/6504/5293/3512/10666/57379/3575/339390/11126/962/1178/5027/10747/54440/3…
GO:0098636	CC	protein complex involved in cell adhesion	43	0.640972	1.77245	1.48024e-06	4.47011e-05	3.32062e-05	4005	tags=63%, list=22%, signal=49%	5354/9358/22915/63923/8516/58494/3680/10077/3679/83700/940/11117/3690/8515/3676/3683/3672/22801/3684/3681/7448/3687/3689/941/3674/3695/3678
GO:0007517	BP	muscle organ development	328	0.440808	1.35662	1.48024e-06	4.47011e-05	3.32062e-05	7456	tags=59%, list=40%, signal=36%	1674/1310/3479/10290/93649/150572/57158/4223/4638/2273/51676/6442/150921/844/2006/3908/1756/11149/6444/22953/221662/5079/23414/2121/6262/6876/51778/140578/283078/64091/146862/3131/8912/3679/1410/8506/70/6445/4208/6258/4634/6840/9241/8320/575/9750/6943/1909/3481/57493/7049/6608/1073/9734/89/5463/26508/26548/8910/10324/1901/4868/825/596/8929/6899/60529/1959/1281/7402/9099/1293/7042/56203/6261/54715…
GO:0010882	BP	regulation of cardiac muscle contraction by calcium ion signaling	24	0.735843	1.9128	1.52207e-06	4.57861e-05	3.40122e-05	1905	tags=42%, list=10%, signal=37%	477/845/287/5350/1756/6262/775/6546/1193/2946
GO:0060537	BP	muscle tissue development	382	0.430896	1.33255	1.54869e-06	4.6407e-05	3.44735e-05	5531	tags=44%, list=30%, signal=32%	4629/221476/1310/5350/3479/5239/26585/88/93649/150572/57158/4223/4638/51676/3776/844/2006/2247/9472/1756/11149/6444/22953/221662/5079/8516/26011/23414/6262/2735/51778/64091/3488/80206/3131/2066/8854/3679/8506/70/6445/4208/148/6258/9096/4634/6840/9241/84525/6546/8320/5999/9750/6943/1909/5156/3481/57493/10052/7049/6608/57538/1073/9734/89/26508/2138/23363/10324/115701/8913/1901/4868/6331/183/5311/22…
GO:0001664	MF	G protein-coupled receptor binding	271	0.452441	1.38665	1.73693e-06	5.18474e-05	3.85149e-05	4734	tags=41%, list=25%, signal=31%	6422/4653/84870/185/284654/116/2775/6363/5179/7275/6863/6366/8643/4920/51308/5731/5064/718/6358/7484/7482/2316/10563/7483/65055/2774/4295/5368/50944/7345/6387/1524/887/4852/9863/10886/6360/729230/552/255061/6356/5071/1901/183/51816/257313/7471/6368/5443/2781/2695/285093/114928/135138/25927/1910/25817/4693/5028/4922/5727/7480/7476/7475/1742/2641/9630/6376/6343/51384/54102/135/6367/8324/26052/9547/…
GO:0050905	BP	neuromuscular process	152	0.493365	1.47931	1.80572e-06	5.36942e-05	3.98868e-05	4337	tags=43%, list=23%, signal=34%	111/23336/3736/54112/9378/1311/5179/4747/844/2903/7143/1756/64478/7140/65217/4130/2743/220/23111/64072/8506/6547/50944/57338/84502/7345/3708/84189/1909/89/1496/92241/5071/9543/1812/1813/6329/2946/6769/54715/51761/57555/497189/4626/6323/441027/1742/104/135/1760/64220/2307/4621/2895/112476/23621/342667/6507/6939/8925/116443/859/340784/2741/2257/6531
GO:0001941	BP	postsynaptic membrane organization	36	0.652975	1.7741	1.9089e-06	5.63307e-05	4.18453e-05	3512	tags=56%, list=19%, signal=45%	4593/22871/5649/9378/9379/57502/2743/1000/54413/388336/5913/8292/57555/2668/1742/375323/51201/85358/22829/64101
GO:0010522	BP	regulation of calcium ion transport into cytosol	96	0.544123	1.58903	1.9089e-06	5.63307e-05	4.18453e-05	3868	tags=46%, list=21%, signal=36%	477/845/287/5350/57158/117/4842/844/9472/1756/22953/6262/7220/5587/775/930/57338/84502/6546/2852/5023/6622/1193/1812/825/5311/596/2946/7222/5027/2149/6376/187/857/5026/9002/799/3270/9001/10268/4283/623/5144/2534
GO:0005516	MF	calmodulin binding	198	0.472899	1.43241	1.97769e-06	5.81395e-05	4.3189e-05	3490	tags=36%, list=19%, signal=30%	4629/4804/1264/4842/4638/119/56479/2596/4135/200373/6543/440279/5136/6262/139728/9590/5121/800/6263/491/775/6547/5137/4628/3782/5153/814/6546/4133/5999/8735/165/6236/492/123041/493/2669/6857/57118/6331/4644/816/6261/28954/815/27133/3780/4620/4626/5996/7273/4619/25827/779/3707/53904/219537/5997/51168/10777/107/5924/3756/9132/23236/5260/64005/7442/4621/9495/4542/84033
GO:0086065	BP	cell communication involved in cardiac conduction	56	0.608888	1.7149	2.01208e-06	5.89274e-05	4.37743e-05	5616	tags=61%, list=30%, signal=43%	477/845/287/29119/482/6330/6262/3741/783/55800/2316/775/781/9096/6546/10052/3762/8913/6331/6910/10021/6324/857/2697/3270/2702/5144/51086/776/3781/10345/388591/23630/478
GO:0060193	BP	positive regulation of lipase activity	67	0.585645	1.66844	2.14966e-06	6.24849e-05	4.6417e-05	4864	tags=57%, list=26%, signal=42%	185/3356/117/2247/64805/3815/2099/148/338328/10316/5322/3702/1909/5156/2260/552/395/183/3357/337/1902/6401/5159/9290/115727/440503/5330/335/728/2263/8698/7294/3491/2321/942/6352/553/5406
GO:0007218	BP	neuropeptide signaling pathway	101	0.533949	1.56215	2.14966e-06	6.24849e-05	4.6417e-05	5052	tags=54%, list=27%, signal=40%	114815/116/4886/5179/11248/10178/6863/9607/22986/57537/1363/2587/27344/10800/2743/2925/9427/5368/10316/2825/57105/4852/10886/8001/4158/4987/6866/5443/3061/6753/4889/4922/2837/2922/4985/4829/64106/6752/6447/4988/2834/100996758/181/56923/2741/2861/5697/4878/796/4887/5539/2742/84109/10888/4923
GO:0019228	BP	neuronal action potential	35	0.676198	1.83403	2.21844e-06	6.4005e-05	4.75461e-05	3135	tags=63%, list=17%, signal=52%	6332/3736/54112/11280/3737/6328/8912/6326/2898/2852/5023/3751/8913/6335/6331/1812/6329/10242/6323/8911/6334/27094
GO:0099061	CC	integral component of postsynaptic density membrane	51	0.617469	1.72997	2.21844e-06	6.4005e-05	4.75461e-05	3943	tags=63%, list=21%, signal=50%	2045/22865/2901/2890/729993/2903/57689/145581/22986/27092/2894/9890/491/2066/1630/5802/388336/64084/94030/53616/1949/59284/26045/107/9746/4985/347731/114798/2895/64101/146395/116443
GO:0007187	BP	G protein-coupled receptor signaling pathway, coupled to cyclic nucleotide second messenger	62	0.590814	1.6764	2.32163e-06	6.67338e-05	4.95733e-05	4223	tags=56%, list=23%, signal=44%	1268/1129/4886/3356/1269/155/3363/5745/2829/4161/4852/1812/183/3357/3973/4158/1133/3274/6753/10203/23566/3355/7253/1131/5739/186/4985/3360/3362/6752/4988/59340/1132/1230/6347
GO:0060076	CC	excitatory synapse	51	0.616166	1.72632	2.42481e-06	6.91872e-05	5.13958e-05	4675	tags=69%, list=25%, signal=52%	22871/2890/152404/440279/57502/57030/491/23208/50944/79953/2891/869/54413/23022/492/388336/246213/6857/8927/57555/27286/9127/26045/1742/5142/27255/22829/2895/2892/9495/64101/2263/114/729956/81832
GO:0005788	CC	endoplasmic reticulum lumen	308	0.442457	1.35981	2.42481e-06	6.91872e-05	5.13958e-05	4973	tags=40%, list=27%, signal=30%	91851/845/1310/10418/1285/7373/338/5179/1066/1286/590/844/1295/8404/81578/1288/1114/2322/4052/1287/718/1296/84570/720/3488/2200/1356/29106/92949/2719/10117/4148/1000/7057/7018/3371/710/4547/7857/2326/54587/2335/11167/1462/80310/1191/169044/54507/1300/337/7471/1281/1293/2695/6345/1297/2157/3487/3698/1307/7476/7475/411/2641/3593/1292/55214/6383/3592/10148/1306/3490/56975/2882/11096/3915/121506/2159…
GO:0043113	BP	receptor clustering	56	0.607464	1.71089	2.52799e-06	7.18671e-05	5.33865e-05	4987	tags=59%, list=27%, signal=43%	4593/22871/5649/22865/9378/2901/9379/1740/2316/2743/1000/2898/9863/5764/388336/3676/3683/8292/57555/57554/8174/1742/375323/51201/85358/3689/2934/3695/8831/7070/729956/348/57728
GO:0015837	BP	amine transport	99	0.535948	1.56649	2.59678e-06	7.35532e-05	5.4639e-05	5237	tags=60%, list=28%, signal=43%	1268/477/3745/7432/3356/9607/1136/6865/6860/3737/83849/23208/148281/6387/143425/5999/1113/341359/2550/552/6857/8973/6622/9900/5071/1812/183/1813/5021/1141/84258/6571/4889/5027/5028/127833/2668/6623/5997/135/8564/3952/59272/85413/26281/2917/18/6529/6570/134/150/151/2912/1137/553/6582/4923/57586/7200
GO:0008038	BP	neuron recognition	49	0.620354	1.73303	2.63117e-06	7.42564e-05	5.51614e-05	4709	tags=63%, list=25%, signal=47%	1268/55118/6900/63923/2042/57453/4685/2596/152330/91624/4692/10371/128434/2043/23022/6091/6092/1826/1949/4978/57463/50863/27255/7852/8829/64221/2290/9037/133418/1954/26047
GO:0010881	BP	regulation of cardiac muscle contraction by regulation of the release of sequestered calcium ion	20	0.765441	1.94989	2.68164e-06	7.54065e-05	5.60157e-05	1905	tags=50%, list=10%, signal=45%	477/845/287/5350/1756/6262/775/6546/1193/2946
GO:0031346	BP	positive regulation of cell projection organization	333	0.435207	1.33982	2.69996e-06	7.56475e-05	5.61948e-05	6020	tags=47%, list=32%, signal=32%	1268/1272/9353/4916/22871/5649/11075/6363/91584/4747/10178/257194/6366/2042/2823/158866/1809/482/4135/64805/4920/3897/5063/57611/9423/3815/140578/4915/5064/22873/5789/2316/8153/55714/79625/4131/5587/4137/3082/85458/238/5979/1236/57451/6387/23316/9750/1996/9863/2043/5764/7043/10154/11141/23363/4914/2335/57118/9638/91752/5176/6091/10602/183/139818/4803/7436/6092/389658/816/9760/7471/5168/146206/707…
GO:0099003	BP	vesicle-mediated transport in synapse	195	0.470305	1.42388	2.73435e-06	7.63356e-05	5.6706e-05	3995	tags=40%, list=21%, signal=32%	1268/9892/22871/22999/3356/2901/11037/120892/5579/6616/440279/6860/6517/783/57502/57030/8224/27445/140730/273/148/1000/79953/143425/54413/154664/6456/9699/5023/246213/6857/3690/8973/8927/50632/6622/9900/6854/8618/1812/5582/1813/6571/6457/57555/9783/5027/5028/127833/29993/5413/7476/6623/320/9024/135/107/8447/26052/112755/8676/26059/22829/1759/80852/112476/23621/27253/9751/9381/84446/146395/23025/8…
GO:0043679	CC	axon terminus	110	0.523239	1.5419	2.94071e-06	8.15103e-05	6.055e-05	6141	tags=61%, list=33%, signal=41%	3736/2901/5179/3776/63923/120892/5579/6543/2899/440279/6572/3737/4915/3738/10590/6547/5122/85458/5368/1393/6546/2898/2852/4852/2043/246213/1395/6622/5582/3746/1813/9256/6571/1006/4922/29993/23157/6623/57282/4919/4985/114131/112476/5798/23767/23025/846/10814/6570/134/796/150/3747/553/9498/8867/4923/6505/22848/7287/6855/5020/2752/5621/4983/794/7399
GO:0008021	CC	synaptic vesicle	195	0.469685	1.422	2.94071e-06	8.15103e-05	6.055e-05	4004	tags=37%, list=22%, signal=30%	9892/5179/2890/2903/115827/11037/9899/120892/6616/440279/284612/6860/114088/84623/57030/8224/9145/23208/9162/273/83992/148281/79953/22987/203190/143425/24141/2550/5802/246213/6857/8927/6622/9900/9627/6854/4803/22895/1813/142684/55530/6571/6833/79772/127833/5413/7732/1742/23157/5142/320/27185/5414/7781/2555/4985/112755/132204/8676/112476/23621/9001/51762/321/9381/388662/525/84446/4909/23025/85439/…
GO:0031032	BP	actomyosin structure organization	191	0.471941	1.42788	2.97511e-06	8.21702e-05	6.10402e-05	5483	tags=46%, list=29%, signal=33%	4629/6422/4653/25802/5239/11155/2318/1264/88/844/6869/2006/10580/7111/23671/7140/84952/51778/10398/80206/10979/70/90102/10391/22843/4628/79822/5156/1073/7043/122786/23363/23136/10324/51466/1901/395/825/29767/1902/56203/10395/1466/91807/5159/221692/7273/1490/8477/9639/55704/79933/22899/22998/55616/4621/84033/7168/58529/7454/4703/64097/335/4205/1465/8829/257019/859/1266/1482/5295/1906/2037/7046/917…
GO:0001655	BP	urogenital system development	350	0.432678	1.33331	3.0095e-06	8.28254e-05	6.15269e-05	3999	tags=35%, list=21%, signal=28%	6422/2045/9353/185/2674/7704/26585/2255/93649/1285/392255/1286/367/2247/120892/168667/9420/8516/54798/2735/2737/2099/84623/7484/26108/79659/341640/7482/80114/168002/2200/59/10736/9370/284/2066/8854/2719/4208/5979/9096/654/9241/2294/9244/25937/9510/3371/6943/1909/5156/9104/25959/9863/2043/23213/6608/2736/26508/2138/57545/7010/28999/57216/5087/8642/5176/4868/5455/183/5311/596/80310/6092/26249/5314/…
GO:0010518	BP	positive regulation of phospholipase activity	55	0.60387	1.70061	3.07829e-06	8.44191e-05	6.27108e-05	4794	tags=60%, list=26%, signal=45%	185/3356/117/2247/64805/3815/2099/148/10316/5322/3702/1909/5156/2260/552/395/183/3357/1902/6401/5159/9290/115727/5330/728/2263/8698/7294/3491/2321/942/6352/553
GO:0072001	BP	renal system development	310	0.439816	1.35179	3.11268e-06	8.50618e-05	6.31882e-05	3999	tags=36%, list=21%, signal=29%	6422/2045/9353/185/2674/7704/26585/2255/93649/1285/392255/1286/2247/120892/168667/8516/54798/2737/84623/7484/26108/79659/341640/7482/80114/168002/2200/59/10736/9370/284/2066/8854/2719/4208/5979/9096/654/9241/2294/9244/25937/9510/6943/1909/5156/9104/25959/9863/2043/23213/6608/2736/26508/2138/57545/7010/28999/57216/5087/8642/5176/4868/5455/183/5311/596/80310/6092/26249/5314/11174/7471/23371/7042/20…
GO:0007193	BP	adenylate cyclase-inhibiting G protein-coupled receptor signaling pathway	76	0.566089	1.631	3.18147e-06	8.66365e-05	6.4358e-05	4751	tags=62%, list=26%, signal=46%	1129/111/4886/64805/4883/2899/9590/5064/2316/1903/5138/1909/2916/2550/1901/2913/1813/4987/1902/1133/9568/2781/5028/5996/3355/5997/1131/4985/165140/3360/6752/11245/4988/9495/2911/2914/2770/2917/846/59340/1132/2861/1906/134/4887/150/2912
GO:0051482	BP	positive regulation of cytosolic calcium ion concentration involved in phospholipase C-activating G protein-coupled signaling pathway	31	0.681336	1.81732	3.31905e-06	9.00669e-05	6.69063e-05	3587	tags=68%, list=19%, signal=55%	185/2840/84636/27334/2843/286530/1901/1812/2151/1813/2846/4987/1902/2149/9290/2841/8477/9002/719/2911/10161
GO:0050866	BP	negative regulation of cell activation	207	0.470761	1.42788	3.49102e-06	9.44035e-05	7.01277e-05	6328	tags=56%, list=34%, signal=37%	1268/6422/1511/1269/640/145581/1378/23495/2737/170692/10875/5169/10077/23208/5592/26279/671/54900/2294/5788/2852/9750/695/5156/55024/6441/729230/387597/3071/11117/116449/8832/10457/3718/5270/284021/56253/2615/2213/133396/558/8654/339390/374403/201633/80380/6693/64092/114770/6376/135/472/4345/10461/4332/7292/282618/26191/30009/23240/941/3623/3586/2267/10859/11326/221395/2241/239/3558/604/864/7056/…
GO:0072006	BP	nephron development	144	0.495193	1.47912	3.56015e-06	9.59385e-05	7.1268e-05	3780	tags=42%, list=20%, signal=33%	26585/1285/1286/2247/54798/2737/84623/7484/7482/59/10736/9370/284/2066/2719/4208/5979/9241/25937/6943/1909/5156/9863/23213/6608/26508/2138/7010/28999/5087/8642/4868/5455/183/5311/596/80310/26249/7471/1910/5159/2303/130497/2668/5727/170690/5175/7475/80000/2625/186/3570/4854/5310/4811/2246/947/4853/30812/3911
GO:0005272	MF	sodium channel activity	46	0.616916	1.71549	3.62927e-06	9.71268e-05	7.21507e-05	3037	tags=54%, list=16%, signal=46%	6332/6327/2901/11280/259232/6330/2899/55800/6328/8912/6326/2898/8913/6335/2900/6331/5311/6329/10021/2897/6323/8911/6324/6338/6334
GO:0019935	BP	cyclic-nucleotide-mediated signaling	81	0.550351	1.59016	3.62927e-06	9.71268e-05	7.21507e-05	3861	tags=51%, list=21%, signal=40%	116/117/108/10335/2982/9472/5139/27115/2740/4880/10486/5592/2983/5138/7057/6344/4881/2044/948/5152/3357/4987/5443/2695/2977/1910/23551/4882/10900/6343/51555/118442/107/187/358/10846/5140/81285/2770/8844/5144
GO:0007158	BP	neuron cell-cell adhesion	17	0.77144	1.91147	3.67703e-06	9.76302e-05	7.25246e-05	1309	tags=65%, list=7%, signal=60%	460/22871/9369/9378/4685/7143/9379/152330/57502/5979/54413
GO:0005581	CC	collagen trimer	85	0.549169	1.59015	3.6984e-06	9.76302e-05	7.25246e-05	5572	tags=66%, list=30%, signal=46%	1310/114905/1285/7373/1286/1295/81035/81578/1288/1287/1296/84570/51435/9370/114898/6441/4060/11117/114899/131873/256076/169044/1300/1281/1293/8292/1297/1307/338872/1292/2219/1306/4481/91522/1278/78989/1289/255631/1303/342035/147372/1284/1290/10882/4015/1302/136227/115908/129080/1291/80781/57642/114897/1282/714/1277
GO:0015850	BP	organic hydroxy compound transport	239	0.459393	1.40078	3.6984e-06	9.76302e-05	7.25246e-05	5161	tags=46%, list=28%, signal=33%	1268/10351/3745/7432/185/3356/338/4842/1066/9607/6860/2587/3737/83849/23208/9194/148281/654/6387/143425/1113/53919/4547/341359/154664/2550/5023/8435/6857/3690/8973/6622/6530/5071/948/1812/183/114880/2824/1813/1582/1191/4129/5021/5244/1141/337/1133/84258/5443/115584/6571/6770/5028/127833/6532/2668/24/19/123264/6623/201780/345274/160728/135/358/857/4035/4481/64220/51738/11309/1601/1080/10859/3952/6…
GO:0061448	BP	connective tissue development	254	0.44612	1.36394	3.6984e-06	9.76302e-05	7.25246e-05	6342	tags=51%, list=34%, signal=34%	25884/9464/651/340419/7704/6423/26585/1311/392255/4256/2247/151449/2202/2690/4920/2121/2737/2487/579/7482/6660/6935/9971/59/10736/4880/23111/7483/4208/5745/2822/4148/5396/654/9241/7227/64641/658/8200/23213/4856/2254/80310/5744/1281/8840/4094/5159/2303/130497/4054/7480/1490/7476/5915/3400/55553/1513/653/309/3570/8609/5310/51738/54360/633/7059/7048/1289/285590/947/659/3952/3200/30812/9658/3202/8415…
GO:0050433	BP	regulation of catecholamine secretion	55	0.601842	1.6949	3.83665e-06	0.000100936	7.49807e-05	2756	tags=53%, list=15%, signal=45%	1268/3745/7432/3356/9607/6860/3737/83849/23208/148281/6387/143425/1113/341359/2550/6857/8973/6622/5071/183/1813/5021/1141/84258/5028/127833/2668/6623/135
GO:0008307	MF	structural constituent of muscle	42	0.64169	1.76884	4.04403e-06	0.000106033	7.87666e-05	4165	tags=60%, list=22%, signal=46%	4629/23336/88/1756/91624/9499/10398/8736/4606/4634/89/825/8470/1466/7169/4626/7273/6525/84033/7168/4703/26287/1465/4607/4604
GO:0015026	MF	coreceptor activity	46	0.615762	1.71229	4.11316e-06	0.000107482	7.98433e-05	5595	tags=78%, list=30%, signal=55%	115350/56963/4804/4920/23547/10082/8434/3547/7049/2838/940/3690/3676/1237/1234/1464/925/4919/7852/941/10268/927/23643/926/8829/920/10266/942/285704/148738/2022/10663/3685/57007/3688/7783
GO:0034719	CC	SMN-Sm protein complex	17	-0.63833	-2.80164	4.31139e-06	0.000112284	8.34104e-05	6740	tags=100%, list=36%, signal=64%	11218/54960/8487/6607/6606/79833/6634/11171/50628/79760/6633/6635/6637/6632/6636/6628
GO:0050432	BP	catecholamine secretion	56	0.601798	1.69493	4.38967e-06	0.000113941	8.46408e-05	2756	tags=52%, list=15%, signal=44%	1268/3745/7432/3356/9607/6860/3737/83849/23208/148281/6387/143425/1113/341359/2550/6857/8973/6622/5071/183/1813/5021/1141/84258/5028/127833/2668/6623/135
GO:0014808	BP	release of sequestered calcium ion into cytosol by sarcoplasmic reticulum	32	0.678713	1.81542	4.52792e-06	0.000116748	8.67265e-05	2228	tags=44%, list=12%, signal=39%	477/845/287/5350/844/9472/1756/6262/775/6546/1193/2946/6261/1234
GO:0007612	BP	learning	144	0.492786	1.47193	4.52792e-06	0.000116748	8.67265e-05	5149	tags=51%, list=28%, signal=37%	477/5649/9369/54112/9378/577/6900/590/6869/2903/7143/9379/22986/6543/64478/6865/6616/3815/2558/266743/4915/57502/5577/4130/23208/6547/50944/57338/84502/5153/2258/54413/1996/5764/1816/5071/1812/183/1813/1141/4987/1621/57144/7122/6833/9486/1742/23236/85358/64220/22829/22943/4885/65009/6310/84446/2534/164312/10882/27023/143941/25769/8831/10396/6529/4212/338811/81832/26047/8867/4923/23542/6505
GO:0010863	BP	positive regulation of phospholipase C activity	40	0.648052	1.78057	4.59705e-06	0.000117748	8.74694e-05	4794	tags=70%, list=26%, signal=52%	3356/117/2247/64805/3815/2099/148/10316/3702/1909/5156/2260/552/395/183/3357/1902/6401/5159/9290/115727/5330/728/8698/7294/2321/942/553
GO:0086002	BP	cardiac muscle cell action potential involved in contraction	50	0.611659	1.71143	4.59705e-06	0.000117748	8.74694e-05	5413	tags=64%, list=29%, signal=45%	287/6327/29119/6330/6262/3741/783/55800/2316/775/781/23704/3757/10052/3762/8913/6331/3752/3764/6323/6324/857/2697/3753/2702/859/2257/776/3781/6640/388591/23630
GO:0051952	BP	regulation of amine transport	91	0.536574	1.56155	4.73531e-06	0.000120891	8.98036e-05	5237	tags=60%, list=28%, signal=44%	1268/477/3745/7432/3356/9607/1136/6865/6860/3737/83849/23208/148281/6387/143425/5999/1113/341359/2550/552/6857/8973/6622/9900/5071/1812/183/1813/5021/1141/84258/4889/5027/5028/127833/2668/6623/5997/135/8564/3952/59272/26281/2917/18/6529/134/150/151/2912/1137/553/4923/57586/7200
GO:0110053	BP	regulation of actin filament organization	262	0.440236	1.34721	5.01182e-06	0.00012753	9.47359e-05	5456	tags=40%, list=29%, signal=29%	6422/171024/4653/9353/25802/88/119/10178/6869/6366/2006/7111/23671/130271/5063/84952/10810/54551/23500/2316/80206/10979/90102/10391/22843/50944/1236/79822/6840/81553/6387/5999/1073/57731/7043/3071/55243/1496/6356/51466/5071/1901/395/4868/10602/29767/5962/1902/146206/56203/10395/11346/126820/1490/246/6708/6376/8477/9639/55704/6710/256949/79933/22899/8936/3059/22998/85358/55616/343578/64857/2934/71…
GO:0007178	BP	transmembrane receptor protein serine/threonine kinase signaling pathway	350	0.430156	1.32554	5.08094e-06	0.000128867	9.57287e-05	5481	tags=44%, list=29%, signal=31%	91851/64388/6422/8483/651/56963/6424/6423/26585/2255/93649/1311/55273/2662/392255/7044/151449/494470/23089/168667/348093/4920/8516/23090/4052/4093/54829/222223/124857/168002/6935/2200/375567/10979/23111/2719/3547/4053/9839/654/9241/753/7057/658/6425/25937/7018/8200/9863/23213/7049/135228/7043/4856/11117/8646/54756/222663/11167/2254/25928/2615/7471/1281/7042/2331/84913/7122/269/7041/3175/57057/405…
GO:0048880	BP	sensory system development	382	0.425551	1.31602	5.2192e-06	0.000131942	9.80132e-05	6434	tags=50%, list=35%, signal=34%	91851/1545/2255/7275/11081/10218/6096/1295/8076/91156/6297/2247/2823/1641/2202/4081/7111/64805/340273/2737/170692/4915/10586/718/7484/196740/1296/57030/341640/7482/6935/55714/2200/491/146862/220/8854/775/1735/1410/7483/5979/124842/2295/654/10371/54549/5961/658/84189/2916/5156/4211/493/246213/23363/57545/5158/50939/57381/5797/5087/27151/5176/7068/221935/2254/596/1813/8929/56853/7042/25932/51761/36…
GO:0016529	CC	sarcoplasmic reticulum	71	0.569397	1.63173	5.35745e-06	0.000134997	0.000100283	2927	tags=38%, list=16%, signal=32%	7060/845/5350/57158/4842/844/10335/9472/6444/202333/6262/6517/6263/781/57338/84502/3708/7057/10324/417/2946/816/6261/6345/123722/55214/1760
GO:2000463	BP	positive regulation of excitatory postsynaptic potential	25	0.711417	1.85341	5.44835e-06	0.000136844	0.000101654	3145	tags=64%, list=17%, signal=53%	22871/5649/22999/9378/152404/50944/23316/5999/54413/154/9699/57555/7476/1742/112755/85358
GO:0048786	CC	presynaptic active zone	74	0.55944	1.60769	5.49571e-06	0.000137588	0.000102207	5747	tags=61%, list=31%, signal=42%	22999/22854/2823/440279/1008/8499/57030/27445/140730/491/23208/8506/2983/1000/2852/9699/5023/493/8927/9900/9783/5028/84628/8497/320/135/112755/8676/26059/9381/84446/2917/23025/2054/114/6853/134/150/23085/8496/5030/6855/9912/22941/25957
GO:0050853	BP	B cell receptor signaling pathway	56	0.598402	1.68536	5.70309e-06	0.000142321	0.000105723	3728	tags=59%, list=20%, signal=47%	931/933/640/5579/115352/148823/26228/930/660/4208/973/89857/3702/974/5788/695/55024/3071/952/23180/596/2213/5293/5336/100423062/3543/4332/23228/5583/26191/4773/257144/123920
GO:0046651	BP	lymphocyte proliferation	281	0.439922	1.34926	5.77222e-06	0.000143584	0.000106661	4781	tags=41%, list=26%, signal=31%	1380/931/3479/6363/2255/933/6869/640/4004/202309/1378/115352/23495/2322/930/26279/5294/4208/944/973/115650/5788/695/3481/1794/6441/22806/729230/940/3071/912/952/7412/1880/959/10457/81704/3718/8995/596/9479/56253/2615/2213/6504/1141/10125/4064/3575/8654/339390/1178/5027/54440/3572/80380/6693/3593/6708/7535/64926/7099/3567/472/51176/923/3592/10148/2697/4332/7292/4478/23228/84433/30835/54106/26191/2…
GO:0007159	BP	leukocyte cell-cell adhesion	363	0.420278	1.2974	5.84135e-06	0.000144839	0.000107594	7118	tags=54%, list=38%, signal=34%	3479/7704/6363/1511/6403/119/6366/1378/58494/2737/1991/10875/26279/54900/115650/1236/5788/6387/9840/1524/9750/3481/6441/729230/2736/940/387597/3071/912/22914/7412/3111/959/3676/10457/81704/3718/3683/6402/56253/2615/2213/6504/337/57126/10125/6401/3575/8654/339390/11126/8174/8013/54440/3572/1949/939/5175/201633/80380/6693/3112/114548/3707/3593/399/6708/7535/64926/135/51176/2625/923/857/3592/10148/1…
GO:0044304	CC	main axon	60	0.590126	1.67048	6.11786e-06	0.000151212	0.000112328	4724	tags=67%, list=25%, signal=50%	4653/3736/6900/23114/1261/1740/6695/3737/4130/4131/4137/8506/6326/1393/4133/10382/6506/3739/57731/2550/23136/3746/6092/4099/7122/57554/57165/6323/1742/6324/135/6334/114131/7881/400746/89796/7070/134/26047/3747
GO:0007157	BP	heterophilic cell-cell adhesion via plasma membrane cell adhesion molecules	51	0.603443	1.69067	6.46349e-06	0.000159248	0.000118298	3315	tags=53%, list=18%, signal=44%	57863/22871/83872/6403/10178/26011/79633/5789/55714/57451/1000/869/11141/7412/8642/3683/23705/91179/56253/6401/23418/120425/286204/57463/923/30835/2895
GO:0002028	BP	regulation of sodium ion transport	86	0.543208	1.57344	7.57226e-06	0.000185976	0.000138152	5028	tags=50%, list=27%, signal=37%	477/1272/6327/4842/2259/1756/482/6330/53826/5348/55800/65267/154215/6546/2258/154/57731/493/6331/5270/1813/486/7402/53822/5027/5187/130497/6324/2040/1760/23072/286183/57520/859/1482/4734/79570/2257/128414/81832/54800/6640/7871
GO:0015085	MF	calcium ion transmembrane transporter activity	133	0.497619	1.48081	7.7112e-06	0.000188791	0.000140243	4628	tags=50%, list=25%, signal=38%	1268/2903/2823/6543/27092/785/6262/7220/783/57419/140803/6263/80036/774/491/8912/775/6547/777/781/114780/3708/6546/55799/7223/492/123041/493/8913/5311/168507/6261/9256/7222/786/23413/8911/59284/342372/59285/779/27039/55283/773/309/117532/5310/7442/4988/7225/3709/255231/9254/55503/27112/116443/7224/728215/25769/57685/255022/80228/79054/117531/776/2904
GO:0042277	MF	peptide binding	300	0.432048	1.32747	7.85013e-06	0.000191588	0.000142321	6600	tags=49%, list=35%, signal=32%	4804/7434/22871/4886/117/9340/2890/590/2903/886/2690/4883/1215/2587/2740/84570/911/774/913/554/1410/2925/322/5745/10316/1393/206338/3953/2825/2891/887/6344/2043/154/10886/4881/552/1395/912/29953/10333/948/7096/11136/1191/2946/5021/2213/9452/4987/7042/23742/2893/3061/6753/1910/4889/10203/1240/3339/3684/4882/7099/320/51555/8322/773/290/10148/4035/4985/3117/4481/30835/64106/799/3689/285601/23621/675…
GO:0099560	BP	synaptic membrane adhesion	25	0.706484	1.84056	8.16062e-06	0.000198541	0.000147486	3512	tags=72%, list=19%, signal=58%	22871/22865/22854/8404/57689/145581/5789/10082/84631/5802/266727/94030/84628/5100/114798/27253/23767/64101
GO:0050867	BP	positive regulation of cell activation	353	0.428474	1.32047	8.26695e-06	0.000200499	0.000148941	5531	tags=45%, list=30%, signal=32%	3479/7704/6363/2255/6403/6869/6366/120892/1378/115352/90865/2737/26228/59/4208/115650/85480/1236/64109/7057/5788/9840/695/3481/729230/2736/940/3071/912/22914/952/7412/9173/3111/1880/10333/959/81704/825/3718/596/2814/9760/6504/1141/57126/10666/558/10125/3575/11126/5159/8013/54440/3572/1949/939/1490/100423062/80380/3684/3112/114548/2811/3707/3593/399/6708/7535/64926/7099/3567/2623/51176/2625/3543/9…
GO:0035025	BP	positive regulation of Rho protein signal transduction	33	0.661609	1.77938	8.54482e-06	0.000205951	0.000152991	3693	tags=61%, list=20%, signal=49%	2840/84636/27334/2843/286530/137735/6091/2151/2846/1281/1902/5159/2149/9290/2841/8477/79933/9002/10161/335
GO:0045123	BP	cellular extravasation	72	0.563746	1.61628	8.54482e-06	0.000205951	0.000152991	5453	tags=65%, list=29%, signal=46%	6403/119/6366/58494/1991/5294/83700/6387/1524/9750/3554/729230/7412/3676/3683/10894/80310/6402/5293/57126/84675/6401/3672/7499/8174/120425/5175/6693/6376/23236/10690/3952/2241/10164/3695/6484/6347/683/7070/9435/83692/566/5657/6093/5734/3688/140885
GO:1903514	BP	release of sequestered calcium ion into cytosol by endoplasmic reticulum	33	0.66154	1.77919	8.68376e-06	0.000208652	0.000154997	2228	tags=42%, list=12%, signal=37%	477/845/287/5350/844/9472/1756/6262/775/6546/1193/2946/6261/1234
GO:0051928	BP	positive regulation of calcium ion transport	117	0.507403	1.5031	9.10057e-06	0.000217322	0.000161437	5052	tags=51%, list=27%, signal=38%	5354/287/57158/117/4638/844/9472/22953/6262/7220/783/65267/930/781/6387/2852/2916/9104/5023/6622/1812/825/3718/5311/2946/6769/815/5336/7222/30845/5159/5027/57165/2149/2641/6376/187/857/5026/9002/799/3306/9001/10268/342667/7225/4283/623/846/1230/6347/2864/7070/776/11027/6352/10345/3596/5335/4923
GO:0048754	BP	branching morphogenesis of an epithelial tube	150	0.484382	1.44962	9.10057e-06	0.000217322	0.000161437	3965	tags=39%, list=21%, signal=31%	9353/340419/6423/26585/2255/5241/367/2247/151449/64478/64399/9723/2737/2099/7484/7482/10736/2719/9241/2294/6943/1909/6608/2736/2138/5087/6356/8642/183/5311/596/4776/5314/7471/25932/2303/57057/2668/5727/170690/7475/80000/51176/1950/186/5310/7075/2246/7048/54922/30812/3911/4855/8829/3202/2263/859/846
GO:0019897	CC	extrinsic component of plasma membrane	167	0.469444	1.41438	9.23951e-06	0.000219963	0.000163399	5871	tags=50%, list=32%, signal=35%	22866/28513/9892/2775/1269/30820/640/6616/1008/10979/64072/80274/60437/2774/59345/1000/7018/2788/1009/64405/1496/8029/8642/5270/146206/2781/6769/2786/7074/6503/1006/5996/54331/1742/246/7535/9630/4018/2784/85397/1004/2219/1016/9265/57664/85358/7881/1003/5340/342667/2770/373509/2241/2534/94120/2791/2242/28316/1540/2268/2792/94235/6247/3092/10681/1007/1002/1010/3055/83850/324/22848/4240/3932/858/548…
GO:0030239	BP	myofibril assembly	64	0.570672	1.62022	9.37844e-06	0.000221909	0.000164845	5483	tags=64%, list=29%, signal=45%	4629/25802/5239/11155/2318/88/844/7111/7140/51778/10398/80206/70/5156/1073/23363/10324/825/29767/56203/1466/91807/5159/7273/79933/4621/84033/7168/58529/4703/4205/1465/859/1482/1906/9172/27063/3688/8837/58/51804
GO:0070509	BP	calcium ion import	87	0.537784	1.55872	9.37844e-06	0.000221909	0.000164845	4223	tags=46%, list=23%, signal=36%	931/5350/6543/115352/783/286097/65267/774/8912/775/6547/777/781/6546/6387/2916/7223/5023/123041/493/8913/5311/5159/8911/779/2641/773/1950/799/7442/2645/10268/55503/27112/2534/859/846/728215/25769/6347
GO:0005230	MF	extracellular ligand-gated ion channel activity	73	0.556895	1.59839	9.51738e-06	0.000223155	0.000165771	5066	tags=66%, list=27%, signal=48%	2901/2890/2903/1136/22953/2899/2558/2894/2743/2567/2898/2891/2566/5023/8001/8973/2900/2564/1141/1143/2893/2570/5027/3359/2897/9127/2561/2568/5026/2555/7442/2895/2892/285242/2560/9177/116443/55879/2741/2557/2562/2554/2904/1137/1142/2569/2742/89832
GO:0048762	BP	mesenchymal cell differentiation	233	0.449177	1.36932	9.51738e-06	0.000223155	0.000165771	5481	tags=47%, list=29%, signal=34%	6422/9464/6423/26585/2255/55273/223117/2042/55698/147906/9723/2487/2316/10736/10979/4139/2066/202151/8854/3082/90102/4208/5979/2295/9241/10371/1000/753/8320/25937/6943/1909/2043/80031/7049/6608/2260/7043/26508/56920/54756/8828/2335/3357/10439/596/8929/6899/6910/7042/7074/57556/10500/3670/1910/7041/2303/57057/130497/2668/10512/54437/140628/51384/23187/286204/51176/2625/2651/653/309/152007/1601/530…
GO:0002253	BP	activation of immune response	301	0.438542	1.34776	9.51738e-06	0.000223155	0.000165771	6154	tags=50%, list=33%, signal=34%	730/1380/931/4239/933/640/5579/1378/5063/115352/721/148823/718/26228/720/2/930/660/716/3075/4208/2822/973/54900/1236/89857/3702/974/5788/5648/9840/715/387357/695/710/55024/940/3071/149628/50852/22914/952/23180/199920/79037/596/4068/1191/2213/5293/10666/56244/5336/11126/8013/10747/2533/1240/1379/100423062/729/5142/7535/7099/925/84106/2625/3543/8302/2219/100528032/2359/7409/4332/259197/64581/23228/…
GO:0086019	BP	cell-cell signaling involved in cardiac conduction	32	0.669062	1.7896	9.65632e-06	0.000224379	0.00016668	3529	tags=62%, list=19%, signal=51%	845/287/6330/6262/3741/783/55800/2316/775/781/9096/10052/3762/8913/6331/6910/10021/6324/2697/2702
GO:0070296	BP	sarcoplasmic reticulum calcium ion transport	39	0.637472	1.74689	9.65632e-06	0.000224379	0.00016668	2287	tags=38%, list=12%, signal=34%	477/845/287/5350/844/9472/1756/6262/775/6546/1193/2946/6261/1234/786
GO:0010517	BP	regulation of phospholipase activity	66	0.576174	1.63921	9.65632e-06	0.000224379	0.00016668	4935	tags=59%, list=27%, signal=44%	185/3356/117/2247/64805/3815/2099/148/10316/5322/3702/1909/5156/2260/552/6622/395/183/3357/1902/6401/5159/22925/9290/5997/4035/115727/5330/728/2263/8698/728113/7294/3491/2321/942/6352/553/636
GO:0030595	BP	leukocyte chemotaxis	226	0.456488	1.39024	9.79526e-06	0.000226928	0.000168574	5108	tags=43%, list=27%, signal=32%	7060/9353/26585/6363/1511/6366/1269/643/9420/151647/3815/2277/3680/6358/26228/9023/10563/5294/83700/1236/245937/7057/6387/3603/1524/9750/1113/7857/6360/5764/6441/729230/4856/3071/22914/57118/6356/1880/1901/146433/6504/5293/7042/6368/3672/1234/1910/11240/120425/1240/5142/57580/2841/6376/7424/6367/1436/3592/100528032/7409/3570/7852/3689/240/719/3586/1235/8740/6357/4283/23075/728/1588/1908/2660/1130…
GO:0060284	BP	regulation of cell development	484	0.409553	1.27431	1.00731e-05	0.000232671	0.00017284	6046	tags=44%, list=33%, signal=30%	4653/2045/9353/4916/3479/5649/5803/91584/2192/4747/223117/7143/120892/5139/4135/443/3897/5063/26011/57611/9423/3815/9723/6860/2737/140578/4915/2487/5789/23500/2316/8153/8434/2200/4057/9370/4131/10979/4880/283659/4137/1620/23111/55679/85458/4825/1903/5979/9241/10371/1638/4133/6387/23316/2258/2852/6585/1524/1630/2043/80031/25960/6608/5764/22891/1600/5802/9734/89/10154/26508/56920/11141/23363/2335/2…
GO:0072562	CC	blood microparticle	113	0.5067	1.49811	1.0351e-05	0.000237675	0.000176557	5889	tags=54%, list=32%, signal=37%	72/590/2162/721/718/720/1356/100529215/2/70/5858/716/3075/7018/715/710/2335/183/5627/1191/10878/3240/337/3512/1/3698/7448/2040/4478/12/3048/3306/3848/2934/5340/3674/3078/335/3250/6521/2638/5444/197/7040/3700/3263/213/348/51279/5345/7730/253461/2022/84000/58/3827/714/728378/2147/713/462
GO:0150063	BP	visual system development	376	0.422818	1.30663	1.0351e-05	0.000237675	0.000176557	6434	tags=50%, list=35%, signal=33%	91851/1545/2255/7275/11081/10218/6096/1295/8076/91156/6297/2247/2823/1641/2202/4081/7111/64805/340273/2737/170692/4915/10586/718/7484/196740/1296/57030/341640/7482/6935/55714/2200/491/146862/220/8854/775/1735/1410/7483/5979/2295/654/54549/5961/658/84189/2916/5156/4211/493/246213/23363/57545/5158/50939/57381/5797/5087/27151/5176/7068/221935/2254/596/1813/56853/7042/25932/51761/4094/23418/1826/4693…
GO:0006909	BP	phagocytosis	233	0.44799	1.3657	1.09068e-05	0.000249697	0.000185488	6557	tags=54%, list=35%, signal=35%	114786/7275/81035/151647/122618/721/1991/718/26228/8406/720/9370/23208/5322/7057/5788/575/3953/9936/1794/6441/729230/3071/3690/57118/948/54734/3683/5582/9844/11031/2213/6504/558/5336/5027/90342/19/100423062/5175/343702/3684/246/399/9938/7099/5806/135/3543/55529/10461/375033/2219/4035/7052/7409/22918/4481/64581/353376/286046/64005/3689/78989/83871/2934/3952/3385/8291/335/51411/1411/2534/197/1130/2…
GO:0031225	CC	anchored component of membrane	166	0.478233	1.44096	1.10457e-05	0.000252134	0.000187298	5153	tags=46%, list=28%, signal=33%	1272/56963/2674/6900/401190/257194/115827/22854/4684/4045/23627/152330/2676/7007/2675/10082/8434/420/2619/2719/338328/64180/5067/7512/135228/161357/266727/133121/4974/417/146760/66004/5314/57126/11126/962/2350/64174/1742/2811/84628/4978/256710/50863/11181/1043/2262/51299/27255/53942/4326/914/1368/349633/130749/10392/146183/419/1271/4062/683/84966/6853/249/7070/285704/148738/130574/2348/8875/43/20…
GO:0014046	BP	dopamine secretion	37	0.633034	1.72379	1.11846e-05	0.000253813	0.000188545	2588	tags=57%, list=14%, signal=49%	1268/3356/6860/3737/83849/23208/148281/6387/143425/341359/2550/6857/8973/6622/5071/1813/1141/84258/127833/2668/6623
GO:0014059	BP	regulation of dopamine secretion	37	0.633034	1.72379	1.11846e-05	0.000253813	0.000188545	2588	tags=57%, list=14%, signal=49%	1268/3356/6860/3737/83849/23208/148281/6387/143425/341359/2550/6857/8973/6622/5071/1813/1141/84258/127833/2668/6623
GO:0016079	BP	synaptic vesicle exocytosis	105	0.518155	1.52234	1.13236e-05	0.000255472	0.000189777	5520	tags=53%, list=30%, signal=38%	1268/22871/22999/3356/2901/120892/5579/6616/440279/6860/783/27445/140730/148/143425/9699/5023/6857/8973/6622/9900/8618/1812/5582/1813/9783/5027/5028/127833/5413/7476/320/135/107/8447/112755/8676/26059/112476/23621/9751/9381/23025/116443/10814/2054/6853/150/1142/8448/9498/8867/5217/84961/5030/6855
GO:1901342	BP	regulation of vasculature development	281	0.435231	1.33488	1.13236e-05	0.000255472	0.000189777	5146	tags=43%, list=28%, signal=32%	7060/5740/126393/6422/1545/6423/26585/1285/10218/577/140862/64094/63923/2247/168667/5579/1215/9723/2277/718/10800/8434/5587/10000/1634/3082/10563/7057/575/1524/9510/7058/26051/23213/25960/729230/4881/493/11117/7010/57381/5797/6356/5176/10457/183/5168/5293/7042/57556/3670/7122/11126/6833/25817/2303/576/3339/4838/23166/1536/7424/79805/187/358/146850/23328/100506013/7852/5140/8742/51738/2113/3687/51…
GO:0021675	BP	nerve development	81	0.538759	1.55666	1.14625e-05	0.000257857	0.000191549	5611	tags=59%, list=30%, signal=42%	4804/4884/91584/494470/2558/2737/3737/5979/10371/84189/1909/23213/123041/8828/4914/7412/401/3676/1258/5270/5582/4803/8929/6899/1959/1141/3670/497189/9935/2561/104/89797/26018/3200/6507/4909/8829/1906/3198/3211/3611/2047/3212/57007/3213/10370/51804/55959
GO:0072676	BP	lymphocyte migration	113	0.506055	1.49621	1.16014e-05	0.000259478	0.000192753	3607	tags=41%, list=19%, signal=33%	6363/347/6366/9420/58494/148823/6358/9023/10563/5294/5979/1236/6387/9750/6360/729230/2838/22914/6356/1880/1901/3676/81704/3683/326/56253/131450/5293/6368/7499/8174/11240/6693/7535/6376/6367/2625/4345/100528032/4478/64005/30009/257144/1235/8740/6357
GO:0050731	BP	positive regulation of peptidyl-tyrosine phosphorylation	183	0.466885	1.40944	1.16014e-05	0.000259478	0.000192753	6549	tags=55%, list=35%, signal=36%	7060/1272/3479/2674/5649/26585/2255/3356/2252/2690/3815/2322/26228/9370/284/2066/3082/148/85480/654/1795/5788/9244/3481/2043/55024/3690/948/183/8995/389658/146433/5168/133396/5336/3670/3572/5175/1464/1742/1489/3593/7448/57091/3567/2623/1436/1950/3592/3059/50507/3570/64581/51738/282618/51378/653361/941/3952/8829/2534/3558/920/11009/3678/7040/916/285016/59067/3263/958/149233/134/150/6352/253260/517…
GO:0001935	BP	endothelial cell proliferation	148	0.480051	1.43538	1.18793e-05	0.000264929	0.000196803	4902	tags=47%, list=26%, signal=35%	7060/7432/4804/185/1285/2247/168667/2277/196740/5587/8854/10000/4208/654/7057/6387/3481/7857/26051/23213/2260/7010/8828/3690/5797/6356/3676/3357/5293/84913/79812/79400/3593/7424/79805/187/1950/857/3592/100506013/8742/51738/240/3586/7075/57608/947/659/3952/335/5365/8829/1960/64102/2324/22846/6347/383/2624/2321/9037/3791/94/7026/348/11061/7046/6776/6678
GO:0060191	BP	regulation of lipase activity	88	0.531763	1.5437	1.20183e-05	0.00026726	0.000198534	4935	tags=51%, list=27%, signal=38%	185/3356/117/2247/64805/3815/2099/148/338328/10316/5322/3702/1909/5156/2260/9734/552/6622/395/183/3357/337/1902/6401/5159/22925/9290/5997/4035/115727/440503/5330/335/728/2263/8698/728113/7294/3491/2321/942/6352/553/5406/636
GO:0014706	BP	striated muscle tissue development	228	0.447768	1.3644	1.24351e-05	0.000275739	0.000204833	5600	tags=46%, list=30%, signal=32%	4629/221476/5350/3479/5239/26585/88/93649/57158/51676/3776/2247/9472/11149/6444/26011/23414/6262/2735/80206/2066/8854/70/6445/4208/148/9096/4634/9241/84525/6546/5999/1909/5156/57493/10052/7049/57538/2138/23363/115701/8913/1901/6331/183/2254/6910/7042/10021/8470/91807/3670/5159/2303/57057/10512/7273/5915/140628/5997/55553/51176/8324/653/4036/50507/2697/22943/84700/65009/7048/2702/7168/6665/4703/48…
GO:1900274	BP	regulation of phospholipase C activity	42	0.62739	1.72942	1.27129e-05	0.000281097	0.000208813	4935	tags=69%, list=27%, signal=51%	3356/117/2247/64805/3815/2099/148/10316/3702/1909/5156/2260/552/395/183/3357/1902/6401/5159/9290/115727/5330/728/8698/7294/2321/942/553/636
GO:0007160	BP	cell-matrix adhesion	229	0.454702	1.38539	1.28519e-05	0.000283362	0.000210496	5396	tags=48%, list=29%, signal=34%	6422/4653/340533/26585/158326/7148/88/347/9358/6366/63923/2042/10580/3897/8516/9723/11170/3680/10516/8499/7007/10979/3679/90102/10391/1842/83700/1236/7057/89/6614/11117/7010/8910/3690/7412/2335/25992/8515/395/948/3676/3683/10894/2824/596/5314/1281/7402/10395/7074/3672/8174/3175/10225/22801/1490/1307/30008/3684/3681/7448/6376/54749/27185/23499/22998/5310/3687/3689/79834/4811/55966/7059/947/349633/…
GO:0051937	BP	catecholamine transport	71	0.558641	1.6009	1.29908e-05	0.000285377	0.000211993	5161	tags=62%, list=28%, signal=45%	1268/3745/7432/3356/9607/6860/3737/83849/23208/148281/6387/143425/1113/341359/2550/6857/8973/6622/6530/5071/1812/183/1813/5021/1141/1133/84258/6571/5028/127833/2668/6623/135/26281/6581/6531/18/150/151/2912/1137/6582/57586/222962
GO:0010880	BP	regulation of release of sequestered calcium ion into cytosol by sarcoplasmic reticulum	28	0.688377	1.80935	1.30168e-05	0.000285377	0.000211993	1905	tags=43%, list=10%, signal=39%	477/845/287/5350/844/9472/1756/6262/775/6546/1193/2946
GO:0042562	MF	hormone binding	87	0.535186	1.55119	1.31298e-05	0.000287042	0.00021323	6534	tags=67%, list=35%, signal=43%	477/7434/117/9340/367/886/2862/2690/4883/2587/2740/220/5745/1393/3953/2852/2825/4161/887/6344/4881/552/1395/7068/3973/2908/7276/5021/3061/1910/269/10203/1240/4882/4036/10148/799/4160/100996758/5295/10266/3624/553/1428/2642/3480/1394/5746/59350/478/1012/2693/4157/2692/2696/2847/5618/90
GO:0032943	BP	mononuclear cell proliferation	285	0.43523	1.33596	1.32687e-05	0.000289265	0.000214881	4781	tags=41%, list=26%, signal=31%	1380/931/3479/6363/2255/933/6869/640/4004/202309/1378/115352/23495/2322/930/26279/5294/4208/944/973/115650/5788/695/3481/1794/6441/22806/729230/940/3071/912/952/7412/1880/959/10457/81704/3718/8995/596/9479/56253/2615/2213/6504/1141/10125/4064/3575/8654/339390/1178/5027/54440/3572/80380/6693/3593/6708/7535/64926/7099/3567/472/51176/923/3592/10148/2697/4332/7292/4478/23228/84433/30835/54106/26191/2…
GO:0001667	BP	ameboidal-type cell migration	412	0.41259	1.27647	1.34076e-05	0.000290815	0.000216032	5396	tags=42%, list=29%, signal=30%	9464/9353/1545/26585/2255/2252/4223/223117/6869/64094/2247/168667/4921/7145/64805/5063/55698/3815/9723/9590/196740/23500/59/5587/284/2066/4163/10000/1634/10563/2719/5294/4208/2822/9839/5979/154810/10371/1000/6546/7057/575/3036/1909/25959/80031/7857/25960/6608/5764/2260/9734/4856/493/56920/7010/8828/3690/57381/5797/2191/2335/11167/51466/5176/6091/3676/183/3357/8929/6899/5168/5293/7042/57556/5336/1…
GO:0015271	MF	outward rectifier potassium channel activity	13	0.813543	1.94149	1.34147e-05	0.000290815	0.000216032	2438	tags=85%, list=13%, signal=74%	3745/3776/343450/3741/3737/3738/3750/3751/5311/3752/57582
GO:0050679	BP	positive regulation of epithelial cell proliferation	190	0.458544	1.38714	1.36855e-05	0.000295859	0.000219779	5080	tags=45%, list=27%, signal=33%	7060/6422/7432/185/3479/2255/2252/6869/367/2247/9420/2277/5587/10000/654/9241/6387/3481/151306/7857/26051/6608/5764/2260/2138/7010/8828/3690/6356/3676/6331/2254/3357/6899/5314/5293/114821/8626/8013/130497/120425/7476/4838/54959/7424/79805/8324/187/1950/653/100506013/3915/8742/51738/3586/2246/5798/57608/659/4853/5365/728/8829/2263/1960/2324/7128/27202/383/57343/2624/9037/3249/252983/657/3912/3791/…
GO:0045765	BP	regulation of angiogenesis	277	0.43605	1.33705	1.41023e-05	0.000304023	0.000225843	5146	tags=43%, list=28%, signal=32%	7060/5740/126393/6422/1545/6423/26585/1285/577/140862/64094/63923/2247/168667/5579/1215/9723/2277/718/10800/8434/5587/10000/1634/3082/10563/7057/575/1524/9510/7058/26051/23213/25960/729230/4881/493/11117/7010/57381/5797/6356/5176/10457/183/5168/5293/7042/57556/3670/7122/11126/6833/25817/2303/576/3339/4838/23166/1536/7424/79805/187/358/146850/23328/100506013/7852/5140/8742/51738/2113/3687/51378/24…
GO:0099084	BP	postsynaptic specialization organization	33	0.652973	1.75615	1.46608e-05	0.000314317	0.00023349	3512	tags=64%, list=19%, signal=52%	4916/22871/5649/4884/22865/9378/9379/2596/5789/8506/1000/869/66000/94030/57555/26045/1742/84628/85358/2895/64101
GO:0051592	BP	response to calcium ion	142	0.483944	1.444	1.46608e-05	0.000314317	0.00023349	4726	tags=44%, list=25%, signal=33%	845/3778/22871/5563/5179/3779/6262/6860/10235/7220/6263/83849/23208/5122/4208/2822/148281/1393/7057/143425/4547/341359/6857/6331/825/5311/56670/84258/6261/25932/125981/5336/7222/5027/10242/127833/7273/246/3707/107/144402/3756/857/10156/27094/10628/100271927/2354/79800/4205/30819/55503/846/4734/7252/27345/114/6529/1906/3625/57699/15/121278
GO:0016324	CC	apical plasma membrane	354	0.419942	1.29446	1.49401e-05	0.000319421	0.000237282	7309	tags=55%, list=39%, signal=34%	84417/287/3778/3736/3776/79901/482/4921/22953/8777/3741/5348/5169/140803/491/9365/5243/146894/5745/338328/23704/1000/7018/9750/1811/6559/154/8170/4118/123041/7010/57216/2335/8029/948/6564/11136/3938/2151/6557/5021/5244/5314/5962/7348/10149/8470/6567/60676/57710/5159/84329/5028/1464/160728/286204/6338/57282/6519/1513/6514/358/117583/8611/53405/4036/57477/2697/4478/3570/11309/54106/55244/3753/15008…
GO:0051249	BP	regulation of lymphocyte activation	448	0.411353	1.27658	1.52193e-05	0.000324497	0.000241053	6328	tags=48%, list=34%, signal=32%	6422/3479/7704/6363/2255/1511/933/6869/6366/640/4004/1378/115352/23495/2737/10875/6935/930/26279/4208/944/54900/115650/814/1236/5788/9840/9750/695/3481/55024/6441/22806/729230/2736/940/387597/3071/912/22914/952/3662/7412/3111/116449/1880/959/10457/81704/3718/8995/596/9479/56253/2615/9760/2213/6504/1141/558/10125/3575/8654/339390/11126/1178/54440/3572/1949/939/100423062/374403/201633/80380/6693/64…
GO:0070663	BP	regulation of leukocyte proliferation	248	0.442682	1.35162	1.54986e-05	0.000328956	0.000244365	4781	tags=43%, list=26%, signal=32%	3479/26585/6363/2255/933/6869/640/4004/1378/115352/90865/23495/5169/26279/4208/944/115650/3568/5788/695/3481/6441/22806/729230/940/3071/912/952/7412/1880/959/10457/3718/1439/8995/596/9479/146433/56253/2615/2213/6504/1141/8654/339390/1178/54440/3572/80380/6693/3593/6708/7535/1438/64926/7099/3567/472/1436/923/3592/10148/4332/7292/84433/30835/54106/26191/23240/941/3586/5588/4773/7048/10859/3952/1132…
GO:0071313	BP	cellular response to caffeine	10	0.847716	1.94145	1.55132e-05	0.000328956	0.000244365	2576	tags=70%, list=14%, signal=60%	845/6262/6263/6546/2946/6261/779
GO:0098698	BP	postsynaptic specialization assembly	20	0.737091	1.87767	1.58729e-05	0.000335667	0.000249351	3315	tags=75%, list=18%, signal=62%	4916/22871/4884/22865/9378/9379/2596/5789/869/94030/57555/26045/84628/85358/2895
GO:0007626	BP	locomotory behavior	191	0.460591	1.39354	1.6057e-05	0.000338638	0.000251557	2821	tags=35%, list=15%, signal=30%	477/460/1272/111/5649/4886/54112/5179/6900/257194/347730/7143/120892/1136/7111/6616/80243/2743/124925/220/64072/10752/238/7345/5153/27306/55084/6387/163175/84189/1996/2916/4211/2043/1600/57731/6414/6886/3751/6622/5071/1812/1813/1141/4987/9099/2695/1143/1621/6571/57144/57555/1826/9293/23551/2668/6323/1949/5090/1742/6623/320/51168/135/57282/55283/8322
GO:0055002	BP	striated muscle cell development	65	0.566848	1.612	1.63363e-05	0.000342665	0.000254549	5483	tags=63%, list=29%, signal=45%	4629/25802/5239/11155/2318/88/844/7111/7140/51778/10398/80206/70/5156/1073/23363/10324/825/29767/56203/1466/91807/5159/7273/79933/4621/84033/7168/58529/4703/4205/1465/859/1482/1906/9172/27063/3688/8837/58/51804
GO:0098657	BP	import into cell	231	0.451531	1.37596	1.63363e-05	0.000342665	0.000254549	6813	tags=56%, list=37%, signal=36%	477/4842/10060/79901/482/6543/6616/1261/6542/9890/65267/79689/774/285195/775/6547/777/84889/781/480/6546/7057/5999/3757/6559/6506/5023/123041/493/3762/80763/3690/6622/6530/5071/6512/3587/948/6564/3676/1812/183/6557/2824/1813/486/3768/10021/3764/6567/6571/3773/2350/6532/2668/779/2170/6511/3763/5997/3769/6338/773/84230/4036/285335/2670/799/55244/7442/10268/2911/59272/6507/120103/55503/27112/2534/65…
GO:0051056	BP	regulation of small GTPase mediated signal transduction	297	0.432224	1.32804	1.77325e-05	0.000370949	0.00027556	6482	tags=53%, list=35%, signal=35%	4653/9353/3479/5649/2255/117/2840/57569/84952/115557/80243/84636/27334/5294/148/79822/1795/2843/286530/9750/5662/1794/57493/25959/440073/137735/4914/55843/395/6091/117289/81704/2151/4803/2846/5962/1281/1902/7042/10395/221472/57514/7074/10125/9828/4168/50649/5159/5923/57636/2149/19/152273/9290/3707/57580/2841/9938/64926/64333/8477/9639/5924/83478/58504/4649/79933/22899/51306/7052/115727/7409/10156…
GO:0014066	BP	regulation of phosphatidylinositol 3-kinase signaling	105	0.515018	1.51313	1.80118e-05	0.000375778	0.000279147	5791	tags=55%, list=31%, signal=38%	4653/4916/3479/5649/6403/2247/4920/3815/2322/4915/284/2066/1634/3082/5783/2852/5156/26051/2260/940/7010/4914/2335/197358/183/5270/80310/7042/10125/5159/2149/25827/51384/4919/1950/3059/56034/653361/5343/113791/3952/5342/1411/4734/118788/2268/2321/3791/6352/10385/54209/7291/3480/2492/867/10870/2147/23396
GO:0001822	BP	kidney development	301	0.433329	1.33173	1.8291e-05	0.000380581	0.000282715	3848	tags=35%, list=21%, signal=28%	6422/2045/9353/185/2674/7704/26585/2255/1285/392255/1286/2247/120892/168667/8516/54798/2737/84623/7484/26108/79659/341640/7482/80114/168002/2200/59/10736/9370/284/2066/8854/2719/4208/5979/654/9241/9244/25937/9510/6943/1909/5156/9104/25959/9863/2043/23213/6608/2736/26508/2138/57545/7010/28999/57216/5087/8642/5176/4868/5455/183/5311/596/80310/6092/26249/5314/11174/7471/23371/7042/3764/1910/5159/230…
GO:0090533	CC	cation-transporting ATPase complex	18	0.73728	1.8472	1.84384e-05	0.000382621	0.00028423	2258	tags=50%, list=12%, signal=44%	477/5350/10060/482/5348/480/486/3764/6833
GO:0001654	BP	eye development	372	0.419197	1.29543	1.88495e-05	0.000390109	0.000289793	5743	tags=45%, list=31%, signal=32%	91851/1545/2255/7275/11081/10218/6096/1295/8076/91156/6297/2247/2823/1641/2202/4081/7111/340273/2737/170692/4915/10586/7484/196740/1296/57030/341640/7482/6935/55714/2200/491/146862/220/8854/775/1735/1410/7483/5979/2295/654/54549/5961/658/84189/2916/5156/4211/493/246213/23363/57545/5158/50939/57381/5797/5087/27151/5176/7068/221935/2254/596/1813/56853/7042/25932/51761/4094/23418/1826/4693/5159/4286…
GO:0099094	MF	ligand-gated cation channel activity	114	0.503478	1.48945	1.9408e-05	0.0004006	0.000297586	5953	tags=61%, list=32%, signal=42%	2901/2890/10060/2903/1136/22953/1261/2899/6262/6263/3782/3708/2898/2891/3757/5023/3762/8973/1258/2900/5311/1141/6261/3768/1143/10021/2893/3764/3780/6833/5027/3359/3773/2897/9127/3763/3769/51555/6338/55283/358/5026/7442/2892/81033/3709/285242/1262/255231/357/9177/116443/54714/55515/3758/79054/3781/2904/1137/1142/40/6340/610/1145/51802/22821/170572/90134/116444/3766
GO:0071772	BP	response to BMP	167	0.463848	1.39752	1.96873e-05	0.000403147	0.000299478	6133	tags=52%, list=33%, signal=35%	91851/64388/6422/56963/6424/6423/26585/1311/55273/392255/7044/151449/494470/168667/348093/4920/23090/4093/222223/2200/375567/23111/2719/654/9241/658/6425/8200/23213/7049/7043/26508/8646/222663/11167/8929/25928/7471/7042/57057/4838/140628/199699/286204/51176/2625/653/4036/164656/9573/22943/1003/659/94031/4853/8321/8287/222008/57045/7040/3491/7554/657/353500/285704/1954/148738/3791/94/3611/10272/64…
GO:0071773	BP	cellular response to BMP stimulus	167	0.463848	1.39752	1.96873e-05	0.000403147	0.000299478	6133	tags=52%, list=33%, signal=35%	91851/64388/6422/56963/6424/6423/26585/1311/55273/392255/7044/151449/494470/168667/348093/4920/23090/4093/222223/2200/375567/23111/2719/654/9241/658/6425/8200/23213/7049/7043/26508/8646/222663/11167/8929/25928/7471/7042/57057/4838/140628/199699/286204/51176/2625/653/4036/164656/9573/22943/1003/659/94031/4853/8321/8287/222008/57045/7040/3491/7554/657/353500/285704/1954/148738/3791/94/3611/10272/64…
GO:0016358	BP	dendrite development	230	0.439811	1.33994	1.96873e-05	0.000403147	0.000299478	6177	tags=51%, list=33%, signal=34%	1501/22871/5649/9201/577/120892/158866/1136/4135/547/5063/9423/8499/5789/80243/4130/124925/4131/4139/5592/4208/238/4917/50944/10371/4133/23316/55619/1630/1996/2043/5764/22891/1600/5802/11141/23363/1496/51473/57118/221935/11178/23769/7436/4776/816/1141/815/23426/51412/4168/57555/1826/1608/221692/29993/7476/1742/25830/9856/6383/53335/27185/26052/653/85442/85358/8609/126147/51738/23072/8577/4205/575…
GO:0044291	CC	cell-cell contact zone	71	0.555155	1.59092	2.02457e-05	0.000411328	0.000305555	3529	tags=39%, list=19%, signal=32%	1674/477/287/5239/5101/29119/9472/6330/58494/3741/5348/6326/83700/1000/6546/2258/10052/57731/23363/6331/7074/6323/4619/6324/2697/55966/79026/2702
GO:0035725	BP	sodium ion transmembrane transport	173	0.47172	1.42237	2.02457e-05	0.000411328	0.000305555	7224	tags=61%, list=39%, signal=38%	6332/477/6327/4842/2259/11280/259232/55117/1756/482/6330/6543/53826/5348/57030/57419/55800/6328/65267/285195/8912/6547/28968/6326/480/6546/2258/6559/123041/493/8913/6530/6335/6331/5311/6557/6329/486/7402/53822/10021/125206/6532/130497/6323/8911/6324/6338/57282/83697/2040/6334/285335/23072/388662/57520/357/859/9963/25769/4734/2257/6531/55515/6529/389015/10786/81832/54800/40/8671/6540/6640/9498/787…
GO:0022407	BP	regulation of cell-cell adhesion	438	0.408305	1.26657	2.02457e-05	0.000411328	0.000305555	7105	tags=53%, list=38%, signal=33%	2045/3479/340533/7704/6363/22915/1511/6403/6366/7143/640/1378/2737/170692/1991/10875/55714/9370/5592/26279/10563/54900/115650/1236/654/5788/6387/9840/9750/3481/6441/729230/2736/940/387597/3071/266727/912/22914/7412/3111/959/3676/10457/81704/3718/5270/56253/2615/5314/2213/6504/5962/7471/10125/6401/3575/8654/339390/11126/8013/54440/3572/1949/939/201633/80380/6693/4838/3112/114548/3707/3593/399/6708…
GO:0032590	CC	dendrite membrane	41	0.614201	1.68707	2.08042e-05	0.000421571	0.000313164	4724	tags=66%, list=25%, signal=49%	3745/2890/729993/8516/2558/491/2567/2852/4355/24141/2566/388336/8910/2564/3746/440829/2555/4985/7442/4988/9495/3748/2557/7070/2554/729956/3747
GO:0050921	BP	positive regulation of chemotaxis	139	0.477205	1.4229	2.10835e-05	0.000426117	0.000316541	6415	tags=56%, list=34%, signal=37%	7060/9353/4916/6363/2255/64094/6366/2247/64805/2277/5587/10563/1233/1236/245937/7057/6387/3603/1524/9750/7857/5764/2260/729230/3071/57118/1901/80310/146433/6504/56670/1826/5159/1240/7424/1436/3592/8823/3570/7852/719/1235/659/8740/23075/728/8829/1908/846/2660/7040/1230/6846/1906/9037/2155/1954/5054/3791/6352/5919/199/54209/1435/566/9647/6375/7941/8817/3565/1012/3929/4908/196527/6688/2621/6868/1587…
GO:0001936	BP	regulation of endothelial cell proliferation	132	0.489378	1.45659	2.13627e-05	0.000430639	0.000319901	4902	tags=48%, list=26%, signal=36%	7060/7432/4804/185/1285/2247/2277/5587/8854/10000/4208/654/7057/6387/3481/7857/26051/23213/2260/7010/8828/3690/5797/6356/3676/3357/5293/84913/79812/3593/7424/79805/187/1950/857/3592/100506013/8742/51738/240/3586/7075/57608/659/3952/5365/8829/1960/64102/2324/22846/6347/383/2624/2321/9037/3791/94/7026/348/11061/7046/6776/6678
GO:0014068	BP	positive regulation of phosphatidylinositol 3-kinase signaling	76	0.546253	1.57385	2.19212e-05	0.000439614	0.000326568	5728	tags=59%, list=31%, signal=41%	4653/4916/3479/5649/6403/2247/4920/3815/2322/4915/284/2066/1634/3082/2852/5156/2260/940/7010/4914/2335/183/80310/7042/5159/2149/51384/4919/1950/3059/56034/653361/3952/4734/118788/2268/2321/3791/6352/54209/3480/2492/867/10870/2147
GO:0007229	BP	integrin-mediated signaling pathway	106	0.508142	1.49342	2.19212e-05	0.000439614	0.000326568	6046	tags=58%, list=33%, signal=40%	9358/8516/3680/10077/2316/10979/5587/3679/55679/9510/5764/3690/2335/8515/959/3676/3683/199920/1281/57126/667/3672/8174/2533/22801/1490/1307/3684/3681/84106/27040/7409/3687/3689/4185/3674/8613/335/3911/8829/7094/3695/3678/7294/2268/683/57343/5341/7070/3611/3055/3696/3685/84695/3688/4739/10451/80739/1793/25/55914/3987
GO:0051481	BP	negative regulation of cytosolic calcium ion concentration	25	0.690364	1.79856	2.20092e-05	0.00044024	0.000327033	1905	tags=44%, list=10%, signal=40%	477/845/4842/3777/3741/6546/1193/5311/596/1813/2946
GO:0002768	BP	immune response-regulating cell surface receptor signaling pathway	247	0.438588	1.3391	2.24797e-05	0.000448497	0.000333166	6135	tags=51%, list=33%, signal=35%	1380/931/933/5602/640/2206/5579/1378/5063/115352/3815/148823/23547/26228/930/660/151888/4208/2822/973/54900/1236/89857/3702/974/5788/9840/387357/695/55024/940/3071/50852/22914/952/23180/199920/79037/596/4068/2213/131450/5293/10666/56244/5336/11126/387837/8013/2533/1240/100423062/5142/7535/925/84106/2625/3543/8302/2219/100528032/2359/7409/4332/259197/64581/23228/84433/64005/5583/26191/53347/719/55…
GO:0016247	MF	channel regulator activity	139	0.476829	1.42177	2.2759e-05	0.000452904	0.00033644	3488	tags=37%, list=19%, signal=30%	6327/9378/4842/2259/10060/1804/9379/30820/57628/6330/5579/27092/3779/53826/5348/55800/2316/65267/51440/5592/2822/23704/3708/2258/219527/4852/154/6236/493/2669/2913/596/3787/3790/486/28954/53822/786/10242/59284/59285/6324/57463/857/30818/27094/126755/7442/3753/7881/1080
GO:0038024	MF	cargo receptor activity	79	0.538779	1.55644	2.30382e-05	0.000457288	0.000339697	6444	tags=63%, list=35%, signal=42%	286133/284297/81035/10216/53353/51435/84171/8029/948/55576/7436/91179/5168/2350/19/4360/84439/3684/9332/23166/7448/84547/923/4036/4035/29967/1238/433/4481/1601/3689/4973/8909/3426/5167/921/283316/5651/619207/2348/8578/57007/84695/84000/6653/55911/51554/80975/84466/8492
GO:0048588	BP	developmental cell growth	218	0.448605	1.36364	2.35967e-05	0.000467179	0.000347044	4859	tags=43%, list=26%, signal=32%	2045/221476/9353/3479/22999/9201/91584/223117/63923/7143/9472/6586/3897/57611/9423/9723/6860/8153/4131/4137/23111/4692/148/4825/8128/10371/4133/6387/2258/5999/6585/54413/1909/1630/80031/5802/6456/9699/56920/6857/8828/2335/5071/3676/23769/183/4803/10439/66000/84258/57556/8470/10500/4099/1826/127833/23566/10512/59284/54437/5997/9856/53335/27185/8936/23499/51299/7852/51199/9706/7048/23767/659/26999/…
GO:0032589	CC	neuron projection membrane	58	0.574051	1.62144	2.3876e-05	0.000471505	0.000350258	4724	tags=62%, list=25%, signal=46%	3745/2890/729993/8516/2558/491/4137/2567/2852/4355/9750/24141/6506/2566/2550/388336/23136/8910/2564/3746/6092/440829/135/2555/4985/7442/4988/9495/3748/2557/7070/2554/134/729956/26047/3747
GO:0003044	BP	regulation of systemic arterial blood pressure mediated by a chemical signal	48	0.599029	1.66979	2.44345e-05	0.000481309	0.000357541	5339	tags=67%, list=29%, signal=48%	185/1511/6869/155/1215/1359/554/148/154/10699/552/1816/183/5021/56670/1910/2149/146/186/81285/7168/59272/5144/1908/6518/6196/2028/1906/553/5345/4846/147
GO:0014704	CC	intercalated disc	49	0.592352	1.6548	2.47137e-05	0.000485577	0.000360711	5596	tags=59%, list=30%, signal=41%	1674/477/287/5239/29119/9472/6330/3741/5348/6326/1000/6546/2258/10052/57731/23363/6331/6323/4619/6324/2697/2702/859/5290/7414/3688/57817/288/87
GO:0055117	BP	regulation of cardiac muscle contraction	72	0.555096	1.59148	2.4993e-05	0.00048859	0.00036295	4604	tags=46%, list=25%, signal=35%	477/845/287/5350/29119/4842/1756/6262/775/5294/148/6546/2258/1113/1193/6331/2946/10021/8654/30845/1490/5142/5997/857/3270/2702/59272/5144/859/51086/1482/4878/134
GO:0048738	BP	cardiac muscle tissue development	214	0.448625	1.36297	2.4993e-05	0.00048859	0.00036295	4116	tags=37%, list=22%, signal=29%	4629/221476/5350/3479/26585/88/93649/57158/51676/3776/2247/9472/11149/6444/26011/23414/6262/2735/80206/2066/8854/70/6445/4208/148/9096/4634/9241/84525/6546/5999/1909/5156/57493/10052/7049/57538/23363/115701/8913/1901/6331/183/2254/6910/7042/10021/8470/91807/3670/5159/2303/57057/7273/5915/140628/5997/55553/8324/653/4036/50507/2697/22943/84700/65009/7048/2702/7168/4703/4853/26281/4205/9242/2263/859…
GO:0030282	BP	bone mineralization	119	0.496291	1.46999	2.55515e-05	0.000498253	0.000370128	4318	tags=45%, list=23%, signal=35%	4958/3479/340419/26585/1311/4256/4921/4920/54829/57419/4057/2719/9365/4208/5745/654/6546/658/338773/154/5764/7043/89/1901/2824/645811/5744/7123/5027/130497/4054/7480/246/2623/4745/56975/2697/162466/240/1278/5251/659/3952/5167/5552/2263/197/7040/3491/2268/1230/2201/249/4015
GO:0014812	BP	muscle cell migration	81	0.527698	1.5247	2.58307e-05	0.000502436	0.000373235	4781	tags=49%, list=26%, signal=37%	7060/9353/3479/1545/93649/6869/3488/9370/5592/4208/9510/80031/6608/4856/3690/183/2254/596/80310/8840/25817/5159/8013/51177/7448/7099/9732/4035/65009/7168/8829/3486/2660/55742/657/5054/3037/9294/6352/199
GO:0014909	BP	smooth muscle cell migration	68	0.556111	1.58647	2.61099e-05	0.000504078	0.000374455	4781	tags=53%, list=26%, signal=39%	9353/3479/1545/93649/6869/3488/9370/5592/4208/9510/80031/4856/3690/183/2254/596/80310/8840/25817/5159/8013/7448/7099/9732/4035/65009/7168/8829/3486/55742/657/5054/3037/9294/6352/199
GO:1901379	BP	regulation of potassium ion transmembrane transport	85	0.529209	1.53235	2.61099e-05	0.000504078	0.000374455	5825	tags=60%, list=31%, signal=41%	845/287/88/3736/2273/1804/30820/9472/57628/482/3788/3779/3755/2316/65267/23704/5999/219527/3757/6000/3746/3787/486/6833/3792/57463/857/30818/126755/3753/7881/30819/1908/859/4734/4878/776/3781/9196/81832/54800/3747/80333/54209/388591/3688/23630/288/144245/8514/5621
GO:0099106	MF	ion channel regulator activity	134	0.485043	1.44352	2.61099e-05	0.000504078	0.000374455	3488	tags=37%, list=19%, signal=31%	6327/9378/4842/2259/10060/1804/9379/30820/57628/6330/5579/27092/3779/53826/5348/55800/2316/65267/51440/5592/2822/23704/3708/2258/219527/4852/154/6236/493/2669/2913/3787/3790/486/28954/53822/786/10242/59284/59285/6324/57463/857/30818/27094/126755/7442/3753/7881/1080
GO:0071816	BP	tail-anchored membrane protein insertion into ER membrane	17	-0.593457	-2.60469	2.62e-05	0.000504561	0.000374813	7574	tags=100%, list=41%, signal=59%	819/9694/23065/7917/51234/7485/55831/284361/51608/56851/8266/6449/439/10328/51016/83460
GO:0005262	MF	calcium channel activity	117	0.49496	1.46624	2.66684e-05	0.000512311	0.000380571	4628	tags=51%, list=25%, signal=39%	1268/2903/2823/27092/785/6262/7220/783/57419/140803/6263/80036/774/8912/775/777/781/114780/3708/55799/7223/123041/8913/5311/168507/6261/9256/7222/786/23413/8911/59284/342372/59285/779/27039/55283/773/309/117532/5310/7442/4988/7225/3709/255231/9254/55503/27112/116443/7224/728215/25769/57685/255022/80228/79054/117531/776/2904
GO:0000727	BP	double-strand break repair via break-induced replication	12	-0.662202	-2.50072	2.77428e-05	0.00053114	0.000394558	6293	tags=100%, list=34%, signal=66%	80198/8317/4175/84296/4174/4172/4171/4176/4173/8318/51659
GO:0007202	BP	activation of phospholipase C activity	30	0.658684	1.75074	2.77854e-05	0.00053114	0.000394558	4794	tags=70%, list=26%, signal=52%	3356/117/64805/148/10316/3702/1909/552/395/183/3357/1902/6401/9290/115727/5330/728/8698/7294/942/553
GO:0002695	BP	negative regulation of leukocyte activation	185	0.465493	1.40583	2.80647e-05	0.00053516	0.000397544	6328	tags=55%, list=34%, signal=36%	1268/6422/1511/1269/640/145581/1378/23495/2737/10875/5169/10077/23208/26279/671/54900/2294/5788/2852/9750/695/55024/6441/729230/387597/3071/116449/8832/10457/3718/284021/56253/2615/2213/133396/558/8654/339390/374403/201633/80380/6693/64092/114770/6376/135/472/4345/10461/4332/7292/282618/26191/30009/23240/941/3623/3586/2267/10859/11326/221395/2241/3558/604/864/7128/57045/11006/7805/2268/79679/383/…
GO:0030900	BP	forebrain development	373	0.414396	1.28051	2.83439e-05	0.00053916	0.000400515	6215	tags=45%, list=33%, signal=30%	477/9353/5649/93986/2255/3736/9201/91584/6900/4747/139411/886/7143/2247/120892/151449/482/64805/5079/79633/2735/2737/84623/4915/79659/7482/6935/79625/220/2066/8854/554/5592/5122/85458/238/166614/10718/9241/10371/1000/1638/6546/8320/6387/2258/285025/6585/1996/4852/6506/6608/1600/2736/493/552/2044/266727/8828/5453/26038/9638/6091/6331/5455/1812/3746/1813/66000/146760/6092/5021/9760/1141/7471/1281/1…
GO:0048638	BP	regulation of developmental growth	312	0.427102	1.31314	2.89052e-05	0.000548492	0.000407447	6950	tags=54%, list=37%, signal=35%	4593/2045/221476/3479/4886/22999/91584/3776/223117/367/7143/2247/9472/2690/3897/57611/23414/9423/9723/6860/2735/8153/4131/4880/4137/2066/1735/23111/4208/4825/9241/10371/84525/4133/6387/2258/5999/6585/8200/1630/3481/154/80031/7049/6608/84944/57731/5802/9699/89/56920/6857/2335/5071/825/2254/4803/10439/596/1813/32/6910/84258/57556/8292/51761/10500/4099/1826/2303/57057/127833/6532/54440/5727/23566/10…
GO:0002274	BP	myeloid leukocyte activation	225	0.442526	1.34721	2.94664e-05	0.000557778	0.000414346	6228	tags=51%, list=33%, signal=34%	1268/1511/1269/120892/640/145581/90865/3815/5730/5169/10077/26228/4137/23208/5294/671/85480/814/2294/64109/6095/7057/5788/1524/695/4852/1113/1794/729230/3662/9173/2335/116449/6622/10333/8832/7096/284021/1191/2213/6504/56670/5293/133396/57126/10666/10125/5336/8013/90342/5729/3684/399/57580/6376/7099/1776/84106/6338/472/2623/4345/27040/22918/7442/3689/945/914/3586/7048/11326/221395/4853/8291/728/22…
GO:0098900	BP	regulation of action potential	52	0.592119	1.66063	3.00277e-05	0.000564273	0.000419171	2145	tags=35%, list=12%, signal=31%	1268/3745/287/29119/6869/1269/6543/6262/2316/775/148/781/9096/2258/948/6331/1141/10021
GO:0086009	BP	membrane repolarization	46	0.592052	1.64636	3.00277e-05	0.000564273	0.000419171	5413	tags=65%, list=29%, signal=46%	477/845/287/9472/482/6330/3741/2316/781/23704/3757/123041/3762/6331/3752/3764/6324/857/2697/3753/81033/2702/30819/859/4878/776/3781/6640/388591/23630
GO:0042100	BP	B cell proliferation	89	0.519543	1.5104	3.00277e-05	0.000564273	0.000419171	5152	tags=53%, list=28%, signal=38%	1380/931/933/640/202309/115352/23495/930/4208/973/115650/5788/695/22806/3071/952/1880/959/596/2213/1141/10125/4064/3575/54440/7099/3567/472/51176/4332/23228/84433/54106/3586/4773/10673/56832/3558/604/683/59067/958/51237/3635/338376/3596/8660
GO:0015872	BP	dopamine transport	51	0.581748	1.62989	3.17114e-05	0.000594474	0.000441606	5161	tags=67%, list=28%, signal=48%	1268/3356/6860/3737/83849/23208/148281/6387/143425/341359/2550/6857/8973/6622/6530/5071/1812/1813/1141/1133/84258/6571/127833/2668/6623/26281/6581/6531/18/2912/1137/6582/57586/222962
GO:0021700	BP	developmental maturation	293	0.425948	1.30824	3.22727e-05	0.000603538	0.000448338	6667	tags=50%, list=36%, signal=32%	4653/3479/5649/7704/26585/6363/5241/9378/577/6900/4747/6366/120892/158866/5139/440279/5064/718/8434/126668/124925/4057/4131/4880/8854/5745/4825/50944/5979/163175/1524/1811/1909/695/57731/123041/89/6886/342618/25893/54738/8642/1901/1258/596/4776/645811/440712/816/7471/7042/6261/26468/558/51412/8941/4313/646/1910/84530/494551/7480/1742/4882/59277/6376/221400/2625/53335/27185/51201/22899/56975/23318…
GO:0031118	BP	rRNA pseudouridine synthesis	10	-0.709998	-2.42231	3.2892e-05	0.000613642	0.000455844	5403	tags=100%, list=29%, signal=71%	84881/27079/115939/54433/285367/55505/1736/55651/113000
GO:0033002	BP	muscle cell proliferation	188	0.454475	1.37416	3.33952e-05	0.000621535	0.000461707	7212	tags=59%, list=39%, signal=37%	4969/7432/7434/3479/1264/93649/347/3776/6869/2006/2247/348093/4883/26011/23414/2735/1991/3488/9370/4880/284/2066/5592/4208/9241/7057/2852/9510/7049/7043/4856/4881/1901/183/2254/80310/6910/7042/8840/4313/25817/4889/10203/5159/8013/2303/57057/30008/3593/6376/7099/5739/3592/2697/3570/4854/3586/65009/7048/7168/659/59272/26281/2263/5950/7128/1482/3486/2660/7040/5290/1906/657/9294/6352/2047/23493/348/1…
GO:0009582	BP	detection of abiotic stimulus	134	0.482593	1.43623	3.39564e-05	0.000628964	0.000467226	5741	tags=56%, list=31%, signal=39%	4804/3736/3356/54112/6863/23349/6869/3815/80036/114780/1000/2898/5961/6387/6785/5957/2916/10886/123041/63895/5158/4914/1258/5311/5270/168507/388531/51761/7222/23418/9293/7273/6323/24/54437/342372/10002/27039/10893/25861/117532/7852/5310/7442/7439/23621/5146/2534/859/131890/25769/6295/2792/6247/611/346007/79054/117531/3249/94233/134/222662/796/3000/2047/40/4923/6101/494513/7287/63982/56925/5132/27…
GO:0072073	BP	kidney epithelium development	140	0.477599	1.42407	3.39564e-05	0.000628964	0.000467226	3848	tags=39%, list=21%, signal=31%	6422/2045/9353/26585/2247/168667/2737/7484/7482/10736/9370/2719/4208/5979/9241/9244/25937/6943/1909/25959/9863/2043/6608/26508/2138/28999/5087/8642/4868/5455/183/5311/596/6092/26249/7471/1910/2303/130497/2668/5727/170690/5175/7475/5915/80000/2625/186/5310/2246/947/4853/30812/3911/2263
GO:0043198	CC	dendritic shaft	36	0.616418	1.67477	3.45177e-05	0.000637837	0.000473818	2240	tags=47%, list=12%, signal=42%	3356/401190/84623/5577/4130/124925/84502/79953/6546/4133/2852/4355/2043/2550/55243/91752/57555
GO:0043116	BP	negative regulation of vascular permeability	17	0.735131	1.8215	3.49719e-05	0.000644695	0.000478912	2756	tags=59%, list=15%, signal=50%	9353/5139/9590/10979/284/5138/6456/7122/6833/135
GO:1902903	BP	regulation of supramolecular fiber organization	365	0.416182	1.28517	3.50789e-05	0.000645136	0.00047924	5385	tags=38%, list=29%, signal=27%	6422/171024/4653/9353/25802/11075/7148/88/119/10178/6869/6366/2006/89795/7111/23671/130271/5063/84952/10810/54551/25999/23500/2316/4130/80206/4131/10979/4137/1410/90102/10391/22843/50944/1236/79822/6840/81553/4133/6387/2258/5999/10382/165/1073/57731/7043/3071/11117/79998/55243/50810/1496/6622/6356/51466/5071/1901/395/4868/10602/1191/29767/5962/1902/146206/56203/10395/11346/126820/91807/89927/1490…
GO:0044325	MF	transmembrane transporter binding	126	0.4876	1.44894	3.56402e-05	0.000653909	0.000485757	5666	tags=48%, list=30%, signal=34%	3745/287/22999/88/4842/2273/10060/120892/30820/9472/57628/6330/6262/5348/644139/55800/2316/140730/23704/6546/2258/219527/9699/89/6331/5311/3746/6769/3752/27133/6833/9783/5142/6324/9532/857/5310/126755/3753/3270/9001/7881/1003/3709/30819/5144/2534/859/846/2257/9196/3747/10345/285966/6640/388591/23630/55690/288/87/8514
GO:0070665	BP	positive regulation of leukocyte proliferation	154	0.465991	1.39835	3.62014e-05	0.000661081	0.000491084	5152	tags=47%, list=28%, signal=35%	3479/6363/2255/6869/115352/4208/115650/3568/5788/3481/729230/940/3071/912/952/7412/1880/959/3718/1439/596/146433/6504/1141/54440/3572/80380/3593/6708/7535/1438/64926/7099/3567/1436/923/3592/10148/7292/84433/30835/54106/26191/941/5588/4773/7048/3952/10673/6480/6777/3558/604/4352/3594/916/683/79679/59067/958/3559/2214/84868/942/11151/149233/3109/10288/6352/199/3596/1435/8660
GO:0097529	BP	myeloid leukocyte migration	220	0.444333	1.35161	3.62014e-05	0.000661081	0.000491084	5911	tags=48%, list=32%, signal=33%	7060/9353/26585/6363/1511/6366/64805/4920/151647/3815/2277/3680/6358/26228/10563/5294/83700/1236/245937/7057/6387/1524/9750/3554/1113/7857/6360/6441/729230/4856/3071/11117/57118/6356/80310/146433/6504/131450/5293/7042/6368/57126/84675/3672/1910/7499/120425/1240/5175/5142/399/57580/6376/7424/6367/1436/4345/23236/7409/3570/3689/719/6357/4283/255231/23075/728/1588/6777/1908/2660/1230/27202/6347/683/…
GO:1901019	BP	regulation of calcium ion transmembrane transporter activity	85	0.525344	1.52116	3.78852e-05	0.000688588	0.000511518	3949	tags=42%, list=21%, signal=34%	477/845/287/5350/57158/4842/844/9472/1756/785/6262/783/781/57338/84502/9104/6236/2669/1193/5311/1813/2946/4987/28954/6769/5336/30845/5142/54106/3306/3270/9001/79026/342667/5144/859
GO:0022612	BP	gland morphogenesis	121	0.493547	1.46443	3.78852e-05	0.000688588	0.000511518	4116	tags=41%, list=22%, signal=32%	6422/2255/5241/2252/367/151449/9420/64478/9423/2735/2737/2099/3488/3082/55679/10718/9241/10371/3371/23213/5764/7043/6356/596/25928/7042/4313/8626/5727/10512/3400/59277/159296/1436/857/7052/4478/5324/2246/7048/2267/4853/3911/10913/8829/2263/859/7128/57045/7040
GO:0031253	CC	cell projection membrane	337	0.415929	1.28075	3.90077e-05	0.000707333	0.000525443	6567	tags=50%, list=35%, signal=33%	3745/2890/729993/1756/11149/79901/482/2596/64805/8516/64399/192668/2121/2558/11170/10235/3737/5064/132884/140803/491/10979/4137/2567/660/388325/2852/4355/9750/24141/361/5662/1811/6506/4547/2566/6608/2550/84168/768206/388336/23136/1816/8910/5158/3690/54587/2191/8029/948/11136/1258/81704/1812/5311/5152/2564/3746/1813/6092/168507/7402/10395/221472/5336/57348/6753/50649/30845/5727/29993/152273/374403…
GO:2001222	BP	regulation of neuron migration	43	0.601664	1.66375	4.01302e-05	0.000722623	0.000536801	2656	tags=44%, list=14%, signal=38%	340533/5649/285313/23768/63923/22854/4825/10718/10371/1496/816/137970/1281/57556/815/54328/221692/84628/6376
GO:0003073	BP	regulation of systemic arterial blood pressure	94	0.517491	1.50817	4.01302e-05	0.000722623	0.000536801	6398	tags=63%, list=34%, signal=41%	185/1511/6869/367/22953/155/1215/1359/554/9365/10391/148/154/10699/552/1816/80763/183/1813/5021/56670/1910/2149/170690/146/186/83988/89797/7442/81285/2702/7168/659/59272/5144/1908/6518/6196/2028/1906/4878/134/796/7026/553/40/5345/4923/4846/147/5125/1579/585/143872/4204/2621/5547/57835/91608
GO:0051216	BP	cartilage development	192	0.450908	1.36411	4.01302e-05	0.000722623	0.000536801	5919	tags=48%, list=32%, signal=33%	25884/9464/651/340419/7704/6423/26585/1311/392255/4256/2247/2202/2690/4920/2121/2737/2487/579/7482/6660/6935/10736/4880/7483/4208/5745/2822/4148/5396/654/9241/7227/658/8200/23213/4856/2254/5744/1281/8840/4094/130497/4054/7480/1490/7476/5915/55553/1513/653/309/5310/51738/54360/633/7059/7048/659/3952/3200/3202/864/55790/57326/7040/3491/50515/64764/1906/657/1302/353500/94/11061/7046/4146/4781/3696/8…
GO:0030020	MF	extracellular matrix structural constituent conferring tensile strength	41	0.603308	1.65715	4.18139e-05	0.000747737	0.000555457	3894	tags=63%, list=21%, signal=50%	1310/1285/7373/1286/1295/81578/1288/1287/1296/84570/131873/256076/1300/1281/1293/1297/1307/1292/1306/91522/1278/1289/255631/1303/1284/1290
GO:0014910	BP	regulation of smooth muscle cell migration	60	0.567551	1.60658	4.18139e-05	0.000747737	0.000555457	4781	tags=55%, list=26%, signal=41%	9353/3479/1545/93649/6869/3488/9370/5592/4208/9510/80031/183/2254/596/80310/8840/25817/5159/8013/7448/7099/9732/4035/65009/7168/8829/3486/657/5054/3037/9294/6352/199
GO:0034704	CC	calcium channel complex	68	0.550506	1.57048	4.18139e-05	0.000747737	0.000555457	4576	tags=53%, list=25%, signal=40%	845/9472/27092/785/6262/783/6263/286097/774/8912/775/777/781/55799/7223/8913/168507/6261/786/8911/59284/59285/779/5142/773/257044/5310/3306/257062/9254/55503/5144/7224/57828/57685/776
GO:0030594	MF	neurotransmitter receptor activity	106	0.500927	1.47222	4.34977e-05	0.000774805	0.000575564	5066	tags=57%, list=27%, signal=41%	1129/3356/2901/2890/2903/1136/2899/2558/3363/2894/2743/2567/2898/2891/2566/2550/8001/1816/8973/2900/1812/2564/3357/1813/1141/1133/1143/2893/3274/2570/3359/2897/3355/2561/2568/1131/2555/3360/3362/2895/2892/2911/285242/2560/9177/116443/59340/55879/1132/2741/2557/2562/2554/134/2904/1137/1142/2569/2742/89832
GO:0000028	BP	ribosomal small subunit assembly	17	-0.578769	-2.54022	4.35273e-05	0.000774805	0.000575564	7847	tags=94%, list=42%, signal=54%	7520/6232/5822/64963/51065/29777/27341/6208/51081/26284/6169/6193/6223/6234/3921/6209
GO:0033627	BP	cell adhesion mediated by integrin	86	0.524542	1.51938	4.51815e-05	0.000798755	0.000593355	5414	tags=55%, list=29%, signal=39%	340533/1545/6423/9358/22915/6366/64805/8516/3680/2200/3679/10563/5294/5979/83700/4856/3071/3690/8515/3676/3683/199920/7042/3672/2303/22801/1307/3684/3681/7448/5140/3687/3689/3674/8613/23075/3695/3678/916/5054/6352/9404/3696/3685/6591/3688/80173
GO:0032609	BP	interferon-gamma production	115	0.491386	1.45513	4.51815e-05	0.000798755	0.000593355	6600	tags=59%, list=35%, signal=38%	1378/9971/51284/1236/3554/729230/22914/114836/9173/56253/51311/6504/10666/558/10125/3670/11126/10225/54440/80380/5142/3593/114770/7099/2625/3592/10148/100528032/7292/64581/54106/282618/26191/51744/914/3623/3586/10859/8809/5144/3558/3594/7294/11006/916/7805/3595/4049/59067/84868/149233/3624/64127/140885/6375/10865/5621/3115/25/50943/7098/2621/64115/8993/3113/11119/3717/171389
GO:0032649	BP	regulation of interferon-gamma production	115	0.491386	1.45513	4.51815e-05	0.000798755	0.000593355	6600	tags=59%, list=35%, signal=38%	1378/9971/51284/1236/3554/729230/22914/114836/9173/56253/51311/6504/10666/558/10125/3670/11126/10225/54440/80380/5142/3593/114770/7099/2625/3592/10148/100528032/7292/64581/54106/282618/26191/51744/914/3623/3586/10859/8809/5144/3558/3594/7294/11006/916/7805/3595/4049/59067/84868/149233/3624/64127/140885/6375/10865/5621/3115/25/50943/7098/2621/64115/8993/3113/11119/3717/171389
GO:0008179	MF	adenylate cyclase binding	12	0.792644	1.86673	4.67205e-05	0.000822898	0.00061129	1366	tags=58%, list=7%, signal=54%	111/117/108/9472/9590/10486/154
GO:0006940	BP	regulation of smooth muscle contraction	61	0.563799	1.59739	4.68652e-05	0.000822898	0.00061129	4722	tags=56%, list=25%, signal=42%	477/1129/3778/1264/93649/6869/2982/1136/6865/3815/5592/148/2852/154/5023/80763/5021/1143/9312/10203/2149/5997/9732/1131/857/51738/6915/56923/18/1906/134/796/150/151
GO:0002443	BP	leukocyte mediated immunity	377	0.415524	1.28428	4.68652e-05	0.000822898	0.00061129	6664	tags=50%, list=36%, signal=33%	730/1380/1511/2208/640/202309/1378/3815/721/1991/5730/718/26228/720/911/913/930/716/5294/2294/5788/388325/1524/715/695/3554/710/1113/729230/940/3071/912/22914/114836/3111/116449/959/8832/23180/3718/1439/284021/23705/326/4068/1191/56253/51311/2213/6504/5293/57126/10666/57379/10125/5336/1621/3575/339390/11126/387837/1178/5027/8013/10225/10747/54440/1379/939/3004/5729/100423062/729/3684/3112/114548/…
GO:0071867	BP	response to monoamine	103	0.509415	1.49454	4.74265e-05	0.000829002	0.000615825	3275	tags=38%, list=18%, signal=31%	1129/111/2775/3356/5179/120892/6262/5731/5064/3363/2316/51617/9370/2774/238/5999/55328/493/1816/50632/6622/5071/1812/3357/1813/1133/2781/3274/3359/8013/3355/54331/5142/9630/1131/85397/7052/3360/3362
GO:0071869	BP	response to catecholamine	103	0.509415	1.49454	4.74265e-05	0.000829002	0.000615825	3275	tags=38%, list=18%, signal=31%	1129/111/2775/3356/5179/120892/6262/5731/5064/3363/2316/51617/9370/2774/238/5999/55328/493/1816/50632/6622/5071/1812/3357/1813/1133/2781/3274/3359/8013/3355/54331/5142/9630/1131/85397/7052/3360/3362
GO:0008305	CC	integrin complex	31	0.643909	1.7175	4.79877e-05	0.000836928	0.000621712	4005	tags=65%, list=22%, signal=51%	5354/9358/8516/3680/10077/3679/11117/3690/8515/3676/3683/3672/22801/3684/3681/3687/3689/3674/3695/3678
GO:0048660	BP	regulation of smooth muscle cell proliferation	135	0.478371	1.42424	4.8549e-05	0.000844818	0.000627573	5116	tags=47%, list=28%, signal=34%	4969/7432/7434/3479/1264/93649/347/6869/2006/2247/348093/4883/1991/3488/9370/4880/5592/4208/7057/2852/9510/7043/4881/1901/183/2254/80310/8840/4313/25817/4889/10203/5159/8013/30008/3593/6376/7099/5739/3592/2697/3570/4854/3586/65009/7048/7168/659/59272/2263/7128/3486/7040/5290/1906/657/9294/6352/348/199/5345/3596/3480
GO:0031000	BP	response to caffeine	13	0.79243	1.89111	4.89177e-05	0.00084933	0.000630925	2756	tags=62%, list=15%, signal=52%	845/6262/6263/6546/2946/6261/779/135
GO:0032535	BP	regulation of cellular component size	348	0.418347	1.2891	5.02327e-05	0.000869145	0.000645645	5257	tags=38%, list=28%, signal=28%	2045/9353/3778/25802/88/91584/6900/119/4747/10178/223117/6366/2006/7143/7111/130271/3897/5063/57611/9423/9723/23500/65267/8153/80206/4131/4137/10000/23111/4825/5979/1236/79822/6840/10371/81553/4133/6387/2258/6585/361/6344/1630/6559/80031/1073/57731/5802/3071/56920/55243/2335/6356/51466/4868/10602/6557/4803/10439/29767/5962/146206/56203/57556/3575/10500/4099/1826/5027/23566/10512/54437/3792/7476/2…
GO:0048265	BP	response to pain	29	0.652186	1.72545	5.0283e-05	0.000869145	0.000645645	2264	tags=48%, list=12%, signal=42%	7060/5649/6863/6869/22953/644139/5979/7057/4914/6530/6335/5582/1621/1910
GO:0090075	BP	relaxation of muscle	34	0.634056	1.71422	5.13553e-05	0.000883743	0.000656489	4604	tags=59%, list=25%, signal=44%	477/5350/3778/2982/5592/6546/1113/89/2946/8654/6833/497189/5028/5142/5997/3270/2934/5144/5290/134
GO:0010524	BP	positive regulation of calcium ion transport into cytosol	53	0.569591	1.59971	5.13553e-05	0.000883743	0.000656489	5946	tags=68%, list=32%, signal=46%	57158/117/844/9472/22953/7220/930/2852/5023/6622/1812/825/5311/2946/7222/5027/2149/6376/187/857/5026/9002/799/9001/10268/4283/623/7070/10345/3596/5335/4923/6375/2147/25/5031
GO:0006584	BP	catecholamine metabolic process	56	0.568947	1.6024	5.24778e-05	0.000899073	0.000667877	4381	tags=50%, list=24%, signal=38%	9464/2903/26002/285671/3067/9365/5153/1909/4852/4881/6622/5071/9627/1812/3642/1813/4129/1141/7042/1621/3684/1610/2625/3689/5053/2861/6531/18
GO:0009712	BP	catechol-containing compound metabolic process	56	0.568947	1.6024	5.24778e-05	0.000899073	0.000667877	4381	tags=50%, list=24%, signal=38%	9464/2903/26002/285671/3067/9365/5153/1909/4852/4881/6622/5071/9627/1812/3642/1813/4129/1141/7042/1621/3684/1610/2625/3689/5053/2861/6531/18
GO:0019774	CC	proteasome core complex, beta-subunit complex	11	-0.672386	-2.46786	5.29423e-05	0.000905034	0.000672305	6103	tags=100%, list=33%, signal=67%	5698/5689/5690/5696/5695/5692/5694/5699/5693/5691
GO:0032946	BP	positive regulation of mononuclear cell proliferation	140	0.473051	1.41051	5.41615e-05	0.000923841	0.000686276	5152	tags=49%, list=28%, signal=35%	3479/6363/2255/6869/115352/4208/115650/5788/3481/729230/940/3071/912/952/7412/1880/959/3718/596/6504/1141/54440/3572/80380/3593/6708/7535/64926/7099/3567/923/3592/10148/7292/84433/30835/54106/26191/941/5588/4773/7048/3952/10673/6480/6777/3558/604/4352/3594/916/683/79679/59067/958/3559/2214/84868/942/11151/149233/3109/10288/6352/199/3596/1435/8660
GO:0007588	BP	excretion	65	0.553146	1.57304	5.64065e-05	0.000957924	0.000711594	5090	tags=57%, list=27%, signal=41%	3778/185/6869/1136/6865/554/148/1811/10699/4881/552/1188/55243/80763/4868/5455/183/1813/1141/1143/1910/135/6338/1187/7442/10686/50617/4867/9429/525/10725/3758/1906/64241/134/54577/6340
GO:0048659	BP	smooth muscle cell proliferation	138	0.47945	1.42814	5.64065e-05	0.000957924	0.000711594	5116	tags=46%, list=28%, signal=34%	4969/7432/7434/3479/1264/93649/347/6869/2006/2247/348093/4883/1991/3488/9370/4880/5592/4208/7057/2852/9510/7043/4856/4881/1901/183/2254/80310/8840/4313/25817/4889/10203/5159/8013/30008/3593/6376/7099/5739/3592/2697/3570/4854/3586/65009/7048/7168/659/59272/2263/7128/3486/7040/5290/1906/657/9294/6352/348/199/5345/3596/3480
GO:0097106	BP	postsynaptic density organization	31	0.640093	1.70732	5.69678e-05	0.00096324	0.000715543	3512	tags=61%, list=19%, signal=50%	4916/22871/5649/4884/22865/9378/9379/5789/8506/1000/869/66000/94030/57555/26045/1742/85358/2895/64101
GO:0001658	BP	branching involved in ureteric bud morphogenesis	57	0.5687	1.6038	5.69678e-05	0.00096324	0.000715543	3780	tags=46%, list=20%, signal=36%	26585/2247/2737/7484/7482/10736/2719/9241/6943/6608/2138/5087/8642/183/5311/596/7471/2668/5727/170690/7475/80000/186/2246/30812/3911
GO:0021953	BP	central nervous system neuron differentiation	169	0.46013	1.38637	5.92239e-05	0.000997042	0.000740653	7030	tags=60%, list=38%, signal=38%	9353/9201/91584/6900/151449/2737/6695/4915/79659/79625/4137/4825/166614/10371/6095/8320/4133/869/1630/1996/4852/2043/6608/1009/57731/161357/2736/6886/266727/8828/26038/401/1812/1813/8929/64843/9760/1141/7471/26468/3670/57057/5727/2051/7476/3400/6324/104/57282/84871/1436/27185/4808/85442/85358/51199/4009/2895/3952/51286/2560/8829/2263/8925/23017/143941/4858/121643/2290/2624/54149/2047/3624/429/898…
GO:0002696	BP	positive regulation of leukocyte activation	340	0.417067	1.2845	5.92239e-05	0.000997042	0.000740653	5531	tags=44%, list=30%, signal=32%	3479/7704/6363/2255/6869/6366/120892/1378/115352/90865/2737/26228/4208/115650/85480/1236/64109/7057/5788/9840/695/3481/729230/2736/940/3071/912/22914/952/7412/9173/3111/1880/10333/959/81704/3718/596/9760/6504/1141/57126/10666/558/10125/3575/11126/8013/54440/3572/1949/939/100423062/80380/3684/3112/114548/3707/3593/399/6708/7535/64926/7099/3567/2623/51176/2625/3543/923/857/3592/10148/100528032/1468…
GO:0098631	MF	cell adhesion mediator activity	64	0.550193	1.56208	6.03519e-05	0.00101164	0.0007515	4474	tags=44%, list=24%, signal=33%	1272/6900/23114/57453/22854/57689/152330/91624/83700/128434/23022/11117/8515/6092/3672/1826/8174/22801/4345/27255/53942/342035/5365/284359/1266/4059/64221/133418
GO:0001823	BP	mesonephros development	99	0.508025	1.48487	6.03519e-05	0.00101164	0.0007515	3848	tags=40%, list=21%, signal=32%	6422/9353/7704/26585/2255/2247/168667/2737/7484/7482/10736/2719/5979/9241/9244/6943/6608/2138/5087/8642/183/5311/596/6092/7471/2303/130497/2668/5727/170690/7475/5915/80000/2625/186/5310/2246/30812/3911/2263
GO:0008373	MF	sialyltransferase activity	21	0.697343	1.78801	6.07158e-05	0.00101555	0.000754403	4948	tags=81%, list=27%, signal=59%	84620/338596/81849/6489/8128/51046/256435/7903/8869/6480/6487/29906/140873/6484/30815/6483/10402
GO:0021954	BP	central nervous system neuron development	80	0.525144	1.51648	6.2608e-05	0.00104047	0.000772916	6119	tags=60%, list=33%, signal=40%	9353/9201/91584/6900/4915/79625/4137/166614/10371/4133/1630/4852/2043/1009/57731/2736/8828/1812/1813/8929/1141/26468/2051/6324/104/57282/84871/27185/4808/51199/3952/2560/8829/2263/143941/4858/2290/2624/2047/429/4781/79600/57178/23077/9693/7832/23334/431707
GO:0051897	BP	positive regulation of protein kinase B signaling	107	0.499324	1.46876	6.2608e-05	0.00104047	0.000772916	5418	tags=50%, list=29%, signal=35%	4653/6363/6366/2247/64805/3488/388121/10979/284/5294/5979/1236/7057/1524/85453/3481/2260/940/7010/23533/5293/558/23551/4922/7066/6376/57091/56917/2625/1950/2651/4036/3059/50507/2159/799/10268/3952/7040/3092/5290/9037/2155/1646/7046/55801/253260/2022/3480/114882/79727/3688/114897
GO:0045177	CC	apical part of cell	419	0.404461	1.25229	6.2608e-05	0.00104047	0.000772916	7309	tags=53%, list=39%, signal=33%	84417/287/3778/3736/3776/79901/482/4921/22953/8777/8516/3741/5348/5169/79659/140803/491/9365/5243/10752/146894/5745/338328/23704/1000/7018/9750/1811/6559/154/8170/4118/123041/7010/57216/7412/2191/2335/8029/8642/948/6564/11136/3938/2151/6557/5021/5244/5314/5962/7348/25932/10149/8470/6567/60676/57710/5159/84329/5028/5727/1464/160728/286204/6338/57282/6519/1513/6514/83697/358/117583/8611/53405/4036/…
GO:0050919	BP	negative chemotaxis	47	0.586125	1.63365	6.3736e-05	0.00105696	0.00078516	2485	tags=47%, list=13%, signal=41%	2045/9353/91584/23768/223117/6586/9423/9723/10718/10371/6585/80031/56920/8828/3690/6091/6092/8633/57556/10500/10512/54437
GO:0001540	MF	amyloid-beta binding	81	0.518374	1.49776	6.71202e-05	0.00110834	0.000823331	6865	tags=64%, list=37%, signal=41%	4804/22871/2890/590/2903/84570/774/1410/322/2891/2043/154/10333/948/1191/2213/9452/7042/2893/3339/3684/7099/320/8322/773/4035/4481/799/3689/23621/2892/10268/321/335/2904/10288/348/43/54209/23542/143458/54103/478/5621/7097/6653/712/323/1139/58512/81618/10307
GO:0030178	BP	negative regulation of Wnt signaling pathway	165	0.460148	1.38568	6.71202e-05	0.00110834	0.000823331	4179	tags=39%, list=22%, signal=30%	6422/152573/6424/6423/26585/63923/4920/27303/147906/56033/2735/2737/2487/388630/80114/144165/4163/2719/9096/9241/1000/6425/25937/22881/27123/51339/164284/388336/115701/5071/2254/4776/25928/3090/100113407/3487/3670/80319/219287/27120/3489/8322/11197/857/64359/4035/100507050/85407/22943/1601/6657/27122/7091/23240/64321/23072/8321/4772/80199/387914/1482/1540/92162/26524
GO:0051279	BP	regulation of release of sequestered calcium ion into cytosol	76	0.534041	1.53866	6.82482e-05	0.00112457	0.00083539	5052	tags=51%, list=27%, signal=38%	477/845/287/5350/57158/4842/844/9472/1756/6262/7220/5587/775/930/57338/84502/6546/2852/6622/1193/1812/825/5311/2946/2149/6376/187/9002/3270/9001/4283/623/5144/11151/7070/10345/3596/5335/4923
GO:0099116	BP	tRNA 5'-end processing	16	-0.568408	-2.31664	6.90231e-05	0.00113493	0.000843086	8039	tags=100%, list=43%, signal=57%	10556/11102/6741/54974/10940/54931/10775/10557/10799/51367/79897/3028/54913/10248/138716
GO:0007212	BP	dopamine receptor signaling pathway	40	0.609572	1.67484	6.93763e-05	0.00113833	0.000845608	2800	tags=42%, list=15%, signal=36%	111/2775/120892/5731/5064/2316/51617/2774/238/5999/1816/50632/1812/1813/54331/9630/85397
GO:0050670	BP	regulation of lymphocyte proliferation	225	0.436785	1.32973	7.16323e-05	0.00117287	0.000871264	4781	tags=42%, list=26%, signal=32%	3479/6363/2255/933/6869/640/4004/1378/115352/23495/26279/4208/944/115650/5788/695/3481/6441/22806/729230/940/3071/912/952/7412/1880/959/10457/3718/8995/596/9479/56253/2615/2213/6504/1141/8654/339390/1178/54440/3572/80380/6693/3593/6708/7535/64926/7099/3567/472/923/3592/10148/4332/7292/84433/30835/54106/26191/23240/941/3586/5588/4773/7048/10859/3952/11326/10673/6777/3558/604/4352/3594/57045/11006/…
GO:1904427	BP	positive regulation of calcium ion transmembrane transport	69	0.538245	1.53905	7.27604e-05	0.00118633	0.000881266	3791	tags=48%, list=20%, signal=38%	5354/287/57158/844/9472/6262/7220/783/930/781/2852/9104/5023/6622/1812/825/5311/2946/6769/5336/30845/57165/2149/6376/187/9002/799/3306/9001/10268/342667/4283/623
GO:0050805	BP	negative regulation of synaptic transmission	69	0.538115	1.53868	7.27604e-05	0.00118633	0.000881266	4860	tags=57%, list=26%, signal=42%	3745/3356/2890/590/1269/7143/120892/22986/2899/57537/6860/57502/9370/4137/23208/2898/869/2550/1816/952/5071/1812/1813/56853/4889/6532/84866/85358/2895/27253/25769/114/392862/6529/134/10288/9294/80863/43
GO:0016339	BP	calcium-dependent cell-cell adhesion via plasma membrane cell adhesion molecules	43	0.594226	1.64318	7.50165e-05	0.00121132	0.000899827	5996	tags=77%, list=32%, signal=52%	28513/22871/6403/26167/1008/56131/64072/5098/1000/1009/64405/56130/8642/56132/8641/6402/56125/56133/1006/1004/1016/1003/28316/56126/1007/1010/57717/56122/1005/56123/51294/1012/22920
GO:0090288	BP	negative regulation of cellular response to growth factor stimulus	101	0.504012	1.47456	7.50165e-05	0.00121132	0.000899827	5995	tags=57%, list=32%, signal=39%	91851/64388/6422/4804/9353/6423/26585/2247/168667/348093/2200/375567/23111/1634/10563/9241/7057/23213/25960/493/11117/8646/183/25928/7471/57556/79812/3593/199699/2625/4036/3592/164656/186/9573/22943/94031/8321/80199/387914/57045/4734/148738/3087/10272/6498/51232/10251/10252/81792/5654/8837/55959/6497/3565/6653/25/63978
GO:0018958	BP	phenol-containing compound metabolic process	111	0.494486	1.45803	7.50165e-05	0.00121132	0.000899827	5149	tags=47%, list=28%, signal=34%	9464/7306/7173/2903/26002/285671/7220/3067/1735/9365/9839/5153/1638/1909/4852/53919/1734/4881/6622/5071/9627/1812/3642/596/1813/6822/4129/1141/7042/1621/6567/7166/7038/3684/1610/1513/2625/1733/10404/3689/4948/5053/2304/2861/6531/18/3249/121278/1428/2034/6528/6505
GO:0010817	BP	regulation of hormone levels	491	0.397862	1.23868	7.50165e-05	0.00121132	0.000899827	6666	tags=44%, list=36%, signal=29%	1268/125/6422/3745/111/7432/185/1545/116/7173/1511/590/6869/886/83539/5126/9607/2690/169026/640/6865/6616/1215/2850/64377/1359/1363/2099/3741/2587/1583/25924/1381/27344/27445/9971/9370/8912/220/8854/1735/9227/5122/4825/2822/339761/127/654/1393/143425/2852/695/5156/1113/53919/1734/2550/10699/9699/4856/387597/126/114899/222546/2044/952/5071/4826/10858/183/1813/6822/7276/8630/5443/2695/6567/3670/575…
GO:0070203	BP	regulation of establishment of protein localization to telomere	11	-0.665985	-2.44437	7.50732e-05	0.00121132	0.000899827	6222	tags=91%, list=33%, signal=61%	6950/908/10575/55135/10576/10694/7203/22948/10574/1736
GO:0060314	BP	regulation of ryanodine-sensitive calcium-release channel activity	26	0.667362	1.74471	7.53175e-05	0.00121274	0.000900882	1905	tags=42%, list=10%, signal=38%	845/5350/57158/4842/9472/1756/57338/84502/1193/5311/2946
GO:0045823	BP	positive regulation of heart contraction	38	0.59939	1.63472	7.61445e-05	0.00122351	0.000908889	5339	tags=61%, list=29%, signal=43%	477/6262/55800/148/5999/1113/552/7042/146/1490/5997/100506013/3270/7168/59272/5144/1908/1482/1906/4878/23493/6505/147
GO:0005852	CC	eukaryotic translation initiation factor 3 complex	15	-0.599688	-2.35735	7.70912e-05	0.00123362	0.000916394	7457	tags=100%, list=40%, signal=60%	51386/8663/8665/728689/8669/8664/8662/10987/3646/8666/8667/10480/27335/8668
GO:0033290	CC	eukaryotic 48S preinitiation complex	15	-0.599688	-2.35735	7.70912e-05	0.00123362	0.000916394	7457	tags=100%, list=40%, signal=60%	51386/8663/8665/728689/8669/8664/1965/8662/3646/8666/8667/10480/27335/8668
GO:0002685	BP	regulation of leukocyte migration	213	0.43919	1.33385	7.72726e-05	0.00123398	0.00091666	5239	tags=44%, list=28%, signal=32%	7060/9353/26585/6363/347/6403/6869/6366/64805/58494/148823/2277/1991/26228/10563/83700/1236/245937/7057/6387/1524/9750/3554/5764/729230/4856/3071/11117/22914/57118/3676/81704/10894/8995/326/80310/146433/6504/131450/6401/7499/8174/11240/1240/6693/399/2841/6376/7424/1436/4345/653/3592/100528032/23236/4478/3570/719/10690/257144/1235/8740/23075/728/623/10164/1588/1908/2660/6484/1230/27202/6347/683/18…
GO:0043279	BP	response to alkaloid	95	0.506699	1.47829	7.84006e-05	0.00124686	0.00092623	4781	tags=43%, list=26%, signal=32%	1268/845/3356/5179/590/6869/2690/27092/6262/6263/5122/8128/1393/6546/5999/1996/6506/1816/221935/1812/5582/1813/2946/5021/1141/6261/779/135/7052/7852/7442/4988/2354/6507/114/6531/18/6529/2912/1788/199
GO:0035265	BP	organ growth	157	0.466329	1.40217	7.84006e-05	0.00124686	0.00092623	4535	tags=41%, list=24%, signal=31%	221476/3479/340419/2255/2252/1311/54796/3776/367/2247/9472/4921/26011/23414/2121/2735/2099/57502/4880/2066/4208/148/9241/3953/5999/3481/57493/7049/6608/84944/1901/183/2254/596/32/6910/7042/8470/5159/2303/57057/6532/54440/5915/5997/309/55841/5324/7059/65009/7048/3952/26281/1588/2263/859/344901/5950/1482/26524/80014/10409/1906/657
GO:0060384	BP	innervation	26	0.666358	1.74209	7.87152e-05	0.0012493	0.000928044	3831	tags=73%, list=21%, signal=58%	4884/494470/2558/5979/10371/84189/1909/23213/4914/7412/3676/5270/5582/3670/2561/104/26018/4909/8829
GO:0098960	MF	postsynaptic neurotransmitter receptor activity	64	0.546978	1.55295	8.06567e-05	0.0012749	0.000947062	5267	tags=66%, list=28%, signal=47%	1129/2901/2890/1136/2899/2558/2894/2743/2567/2898/2566/2550/1816/8973/2900/1812/2564/1813/1141/1133/1143/2570/2897/2561/1131/2555/2895/2892/2911/2560/116443/59340/1132/2741/2557/2554/1137/1142/2569/2742/89832/1145
GO:0042110	BP	T cell activation	486	0.395535	1.23097	8.06567e-05	0.0012749	0.000947062	7987	tags=57%, list=43%, signal=33%	3479/7704/6363/1511/6366/4004/1378/57705/3815/2737/10875/6935/911/4063/26279/5294/944/60437/54900/115650/814/1236/3702/6095/8320/5788/9840/3953/9750/387357/3481/1794/6441/729230/2736/940/387597/3071/912/22914/3662/114836/7412/3111/1880/197358/959/8832/10457/81704/3718/3683/8995/596/9479/326/56253/2615/9760/2213/6504/7471/5293/10125/54518/3575/8654/917/339390/11126/10803/962/9935/1178/5027/54440/3…
GO:0001990	BP	regulation of systemic arterial blood pressure by hormone	38	0.597643	1.62996	8.17848e-05	0.00128749	0.000956411	5314	tags=63%, list=29%, signal=45%	185/1511/6869/1215/1359/554/10699/552/1816/183/5021/56670/1910/2149/186/81285/59272/1908/6196/2028/1906/553/5345/4846
GO:0015103	MF	inorganic anion transmembrane transporter activity	149	0.468178	1.40051	8.17848e-05	0.00128749	0.000956411	6504	tags=56%, list=35%, signal=37%	11095/10060/203859/2558/5348/2743/2567/6508/1811/6559/2566/8001/1188/6530/1193/6557/2564/115111/94015/25932/121601/6571/26266/57348/2570/6532/2561/54102/2568/57282/1187/83697/84230/53405/2555/375611/219855/7439/55867/1080/2560/57101/6521/6560/1836/1179/56923/55879/2741/54831/2557/6531/2562/6561/6529/6570/2554/10786/2569/8671/9635/1185/2742/6528/9498/6505/1244/9990/368/63982/5172/284129/10257/9497…
GO:0031091	CC	platelet alpha granule	91	0.50768	1.47746	8.29128e-05	0.0013026	0.00096764	5018	tags=51%, list=27%, signal=37%	3479/88/22915/6403/7044/2162/2277/2/3082/3671/7057/5099/3481/710/7058/135228/7043/3690/2335/6622/948/5270/5627/1191/7042/1/2157/5104/5175/340205/7424/1950/7450/12/5340/3674/1675/5552/197/7040/2153/5054/213/9749/6678/5345
GO:0051932	BP	synaptic transmission, GABAergic	50	0.577383	1.61553	8.40409e-05	0.00131766	0.000978824	4604	tags=58%, list=25%, signal=44%	1268/22871/22865/23349/6869/1269/2558/266743/8224/2567/148/5334/85445/2566/2564/1813/5021/57555/4889/2561/135/2555/9746/23228/9001/2557/6529/2554/134
GO:0003151	BP	outflow tract morphogenesis	77	0.532135	1.53388	8.7425e-05	0.0013652	0.00101414	5122	tags=57%, list=28%, signal=42%	9464/4886/6423/2006/23414/4208/9241/1909/7049/26508/2138/8828/6091/6092/6899/7042/6261/3670/7122/4889/2303/57057/10512/4036/64321/5308/7048/2702/659/8321/8829/2263/1482/55742/1906/657/2535/4887/2348/3611/23493/2022/7291/23129
GO:1903305	BP	regulation of regulated secretory pathway	139	0.465318	1.38745	8.7425e-05	0.0013652	0.00101414	5520	tags=48%, list=30%, signal=34%	1268/3745/22871/3356/120892/640/5579/6860/783/140730/8912/83849/23208/148/148281/2294/143425/341359/729230/5023/3071/6857/8973/8913/8832/1812/5582/1813/2213/84258/57126/8941/9783/5028/127833/8911/5413/7476/3684/320/84106/135/2623/107/8447/3689/23621/55503/2241/116443/2242/2268/6853/2624/150/1142/30817/8448/9498/3596/5217/57586/84961/8938/9846/5030/6855
GO:0031256	CC	leading edge membrane	175	0.455281	1.37265	8.85531e-05	0.00138004	0.00102516	5791	tags=50%, list=31%, signal=35%	3745/2890/729993/8516/2558/11170/10235/3737/491/10979/4137/2567/273/660/388325/2852/4355/9750/24141/5662/6506/2566/2550/84168/388336/23136/8910/3690/2191/81704/5152/2564/3746/6092/10395/221472/5336/50649/29993/152273/1464/51177/440829/135/2555/23499/4985/3936/64005/7442/83543/4988/9495/57608/7168/8844/7094/10044/23586/3678/3748/2268/6792/2557/23362/23526/5341/7070/10630/2554/134/729956/23189/2604…
GO:0071415	BP	cellular response to purine-containing compound	13	0.782047	1.86633	8.88989e-05	0.00138265	0.00102711	2576	tags=62%, list=14%, signal=53%	845/6262/6263/6546/2946/6261/5028/779
GO:0042113	BP	B cell activation	250	0.429654	1.3124	9.30653e-05	0.00144456	0.00107309	5546	tags=43%, list=30%, signal=31%	1380/6422/115350/931/933/643/640/202309/5579/1378/115352/23495/3815/2322/930/4208/973/54900/115650/974/5788/55619/695/55024/22806/9734/940/3071/952/4914/7412/1880/959/3676/3718/139818/596/2213/9452/1141/5293/57379/10125/5336/4064/3575/5450/3175/54440/939/100423062/374403/64092/159296/7535/7099/3567/472/51176/3543/4332/7292/23228/84433/54106/30009/3623/3586/4773/1235/10673/9473/56832/4853/23075/67…
GO:0005044	MF	scavenger receptor activity	47	0.582873	1.62459	9.41933e-05	0.00145624	0.00108177	6444	tags=72%, list=35%, signal=47%	286133/284297/81035/10216/51435/84171/948/55576/91179/5168/84439/9332/23166/7448/84547/923/4035/1238/4481/8909/3426/5167/921/283316/5651/619207/8578/57007/84695/84000/51554/80975/84466/8492
GO:0010927	BP	cellular component assembly involved in morphogenesis	110	0.491349	1.44792	9.41933e-05	0.00145624	0.00108177	5483	tags=51%, list=29%, signal=36%	4629/1272/287/25802/5239/11155/2318/88/844/7111/7140/26011/64753/51778/10398/80206/8506/70/90102/5156/1073/23363/23136/10324/825/29767/56203/6691/1466/91807/4099/5159/7273/23187/79933/4621/5376/84033/7168/58529/4703/4205/1465/400746/859/1482/1906/200576/9172/5990/23332/27063/3688/8837/58/51804
GO:0006167	BP	AMP biosynthetic process	14	-0.614073	-2.34834	9.4679e-05	0.00146084	0.00108519	7189	tags=100%, list=39%, signal=61%	5198/158/159/2618/122622/132/5634/471/318/5471/3251/10606/353
GO:0097107	BP	postsynaptic density assembly	17	0.716004	1.77411	9.54327e-05	0.00146955	0.00109166	3315	tags=71%, list=18%, signal=58%	4916/4884/22865/9378/9379/5789/869/94030/57555/26045/85358/2895
GO:0070131	BP	positive regulation of mitochondrial translation	15	-0.592049	-2.32732	9.80474e-05	0.00150682	0.00111934	7599	tags=100%, list=41%, signal=59%	55005/79072/22868/51654/81554/23107/84881/54931/26995/285367/84769/28958/84300/708
GO:0045956	BP	positive regulation of calcium ion-dependent exocytosis	17	0.714709	1.7709	0.000100004	0.00153386	0.00113943	2871	tags=59%, list=15%, signal=50%	3745/6860/8912/143425/341359/6857/8913/8941/8911/8447
GO:0005901	CC	caveola	82	0.520087	1.50408	0.000100962	0.00154549	0.00114807	5871	tags=57%, list=32%, signal=39%	5740/477/3778/729085/3356/117/10580/120892/9472/11149/8436/3741/5348/148/6608/7223/493/948/6331/284119/10395/6401/2149/5727/30846/8611/857/3667/7048/659/859/23209/114/6531/657/26509/1946/3055/3480/7035/858/4846/147/867/347273/356/1012
GO:0006956	BP	complement activation	56	0.559404	1.57553	0.00010209	0.00155662	0.00115633	3930	tags=48%, list=21%, signal=38%	730/1380/4239/1378/721/718/720/2/716/3075/5648/715/710/1191/10747/1379/100423062/729/3543/2219/78989/3848/3426/11326/1675/3078/5199
GO:0007015	BP	actin filament organization	439	0.400031	1.24096	0.00010209	0.00155662	0.00115633	5456	tags=37%, list=29%, signal=27%	6422/171024/4653/9353/56776/25802/83872/29119/88/119/10178/6869/6366/2006/10580/1809/7111/23671/130271/5063/84952/11170/10810/54551/8522/23500/800/2316/8153/80206/10979/70/90102/10391/10278/22843/50944/1236/79822/6840/84940/81553/6387/5999/7018/55607/283446/1073/57731/7043/339768/3071/55243/1496/6356/51466/5071/1901/395/4868/10602/7456/596/4644/9844/29767/5962/1902/146206/56203/10395/11346/8470/1…
GO:0031261	CC	DNA replication preinitiation complex	12	-0.631619	-2.38522	0.000103044	0.00156155	0.00115999	2856	tags=92%, list=15%, signal=78%	4175/84296/4174/4172/64785/9837/4171/4176/4173/8318/51659
GO:0099622	BP	cardiac muscle cell membrane repolarization	36	0.597643	1.62376	0.000103218	0.00156155	0.00115999	5413	tags=67%, list=29%, signal=47%	287/6330/3741/2316/781/23704/3757/3762/6331/3752/3764/6324/2697/3753/81033/2702/30819/859/4878/776/3781/6640/388591/23630
GO:0045667	BP	regulation of osteoblast differentiation	123	0.475406	1.41163	0.000103218	0.00156155	0.00115999	5384	tags=47%, list=29%, signal=34%	6422/9464/3479/6423/26585/2662/6096/63923/2247/4921/2735/2737/3488/4057/10979/5587/4880/202151/9770/3082/4208/117581/654/9241/658/25937/338773/8646/222663/3199/126820/8840/8626/3572/5727/7480/7424/4745/56975/3570/659/64093/2263/344901/57045/3491/2201/657/4037/115908/3611/55363/9260/7291/860/51232/23051/6591
GO:0030534	BP	adult behavior	136	0.473062	1.40913	0.000103218	0.00156155	0.00115999	4785	tags=48%, list=26%, signal=36%	477/9369/3356/9378/6900/9379/9607/1136/7111/5079/285671/57502/80243/2743/124925/10752/238/50944/7345/1393/6387/163175/84189/54413/4852/6506/2043/2566/1600/57731/6622/5071/221935/1812/1813/1141/2695/1143/1621/57555/2668/6323/1949/5413/5090/6623/4985/85358/114798/51738/27253/4988/3952/525/51286/4909/181/2741/2257/18/7545/85446/26047/2912/1137
GO:0009187	BP	cyclic nucleotide metabolic process	39	0.604344	1.65611	0.000105474	0.00158948	0.00118075	4815	tags=67%, list=26%, signal=50%	111/108/2982/27115/4880/2983/6095/5138/4881/5152/5744/2977/8654/5142/4882/8622/107/196883/10846/113/5144/114/4878/3000/55811/115
GO:0050730	BP	regulation of peptidyl-tyrosine phosphorylation	249	0.428565	1.30876	0.000105474	0.00158948	0.00118075	6549	tags=49%, list=35%, signal=32%	7060/6422/1272/2045/3479/2674/5649/6423/26585/2255/3356/2252/2690/3815/2322/26228/9370/284/2066/3082/148/85480/654/1795/5788/9244/3481/2043/55024/3690/948/183/8995/80310/389658/146433/5168/133396/5336/3670/9467/3572/5175/1464/64092/1742/1489/3593/7448/57091/3567/2623/1436/1950/857/3592/3059/50507/3570/64581/116379/51738/282618/56034/3689/51378/653361/941/3952/8829/2534/3558/920/11009/3678/7040/11…
GO:0090102	BP	cochlea development	49	0.57352	1.60219	0.000106602	0.00160337	0.00119106	4772	tags=55%, list=26%, signal=41%	4916/3776/2558/3777/2487/6935/9096/55084/84189/2043/246213/2138/8642/140469/6899/497189/53904/2561/2625/375611/5816/2624/3249/3198/2535/115908/23493
GO:0030902	BP	hindbrain development	148	0.463025	1.38448	0.00010773	0.0016172	0.00120134	7098	tags=59%, list=38%, signal=37%	1272/2662/2247/482/2735/57502/124925/8854/85458/9241/6095/869/6608/22891/1600/2736/1496/3199/401/6331/5270/3746/596/8929/1959/2213/7471/10395/23026/8941/6753/9935/6532/7476/51176/8322/4808/1950/653/85442/146057/25861/4009/2895/9001/6752/1152/51286/80184/8925/79971/4760/23017/2020/916/18/2624/3211/23543/2047/199/429/58155/4781/3212/64211/3480/340719/54910/3688/3213/79809/4983/25/3975/4204/54806/53…
GO:0071868	BP	cellular response to monoamine stimulus	100	0.497902	1.4556	0.000108858	0.00162784	0.00120924	3275	tags=37%, list=18%, signal=31%	1129/111/2775/3356/120892/6262/5731/5064/3363/2316/51617/9370/2774/238/5999/493/1816/50632/6622/5071/1812/3357/1813/1133/2781/3274/3359/8013/3355/54331/5142/9630/1131/85397/7052/3360/3362
GO:0071870	BP	cellular response to catecholamine stimulus	100	0.497902	1.4556	0.000108858	0.00162784	0.00120924	3275	tags=37%, list=18%, signal=31%	1129/111/2775/3356/120892/6262/5731/5064/3363/2316/51617/9370/2774/238/5999/493/1816/50632/6622/5071/1812/3357/1813/1133/2781/3274/3359/8013/3355/54331/5142/9630/1131/85397/7052/3360/3362
GO:0006388	BP	tRNA splicing, via endonucleolytic cleavage and ligation	10	-0.670629	-2.28799	0.000109357	0.00163215	0.00121244	6135	tags=100%, list=33%, signal=67%	116461/1653/51493/10978/339487/51637/79042/83707/283989
GO:0005125	MF	cytokine activity	218	0.436357	1.32641	0.000109986	0.00163525	0.00121475	5105	tags=41%, list=27%, signal=30%	64388/651/26585/6363/2662/392255/7044/6366/2247/151449/90865/6358/7484/7482/9370/10563/7483/944/85480/654/6387/9244/3603/8200/114900/7857/6360/7043/6356/116173/959/8995/146433/7471/7042/6368/55258/25817/4693/7480/7066/7476/7475/4838/1489/3593/6376/51384/3567/6367/9547/653/3592/10148/9573/7292/284415/8742/282618/3623/3586/8740/10673/2323/6357/56832/4283/123920/27190/83729/3558/11009/2660/4050/7040…
GO:0032944	BP	regulation of mononuclear cell proliferation	228	0.433523	1.32099	0.000109986	0.00163525	0.00121475	7225	tags=56%, list=39%, signal=35%	3479/6363/2255/933/6869/640/4004/1378/115352/23495/26279/4208/944/115650/5788/695/3481/6441/22806/729230/940/3071/912/952/7412/1880/959/10457/3718/8995/596/9479/56253/2615/2213/6504/1141/8654/339390/1178/54440/3572/80380/6693/3593/6708/7535/64926/7099/3567/472/923/3592/10148/4332/7292/84433/30835/54106/26191/23240/941/3586/5588/4773/7048/10859/3952/11326/10673/6480/6777/3558/604/4352/3594/57045/1…
GO:0071695	BP	anatomical structure maturation	243	0.429324	1.3101	0.000111114	0.00164886	0.00122486	6667	tags=50%, list=36%, signal=33%	4653/3479/7704/26585/6363/5241/577/6900/6366/120892/5139/718/8434/126668/4057/4880/8854/5745/4825/5979/163175/1524/1811/1909/695/57731/123041/89/6886/342618/25893/54738/8642/1901/1258/596/645811/440712/7471/7042/6261/26468/558/51412/8941/4313/646/1910/84530/494551/7480/4882/59277/6376/221400/2625/53335/56975/23318/257044/2697/64581/162466/2038/7059/30813/1003/1080/84456/1235/3952/342035/257062/51…
GO:0030021	MF	extracellular matrix structural constituent conferring compression resistance	21	0.688018	1.7641	0.000112919	0.00167245	0.00124238	2550	tags=52%, list=14%, signal=45%	4969/5549/127435/10216/54829/1634/10117/4060/1462/2331/3339
GO:0071625	BP	vocalization behavior	19	0.706752	1.78477	0.000113146	0.00167263	0.00124251	3266	tags=68%, list=18%, signal=56%	9369/9378/9379/2737/57502/1620/50944/54413/497189/27286/1742/85358/22829
GO:0015629	CC	actin cytoskeleton	493	0.394805	1.22934	0.00011337	0.00167275	0.0012426	5456	tags=37%, list=29%, signal=27%	4629/1268/171024/27129/56776/25802/5239/11155/72/88/57565/4638/119/91977/2042/10580/1809/1756/7111/4921/63876/5579/27145/130271/27295/7140/84952/26166/11170/91624/51778/25924/9499/8522/800/2316/10398/59/10979/1410/70/273/10391/83992/4628/4634/83700/6840/1000/881/8735/10886/55607/23022/283446/1073/57731/10699/89/342527/7010/1496/92241/137735/7412/6622/395/4026/10602/140469/7456/4644/22979/5244/297…
GO:0019933	BP	cAMP-mediated signaling	50	0.572273	1.60123	0.000116765	0.00170341	0.00126538	3861	tags=50%, list=21%, signal=40%	116/117/108/9472/5139/27115/2740/10486/5138/6344/2044/4987/5443/2695/23551/6343/51555/118442/107/187/5140/81285/2770/8844/5144
GO:0060393	BP	regulation of pathway-restricted SMAD protein phosphorylation	59	0.552652	1.56242	0.000116765	0.00170341	0.00126538	5060	tags=59%, list=27%, signal=43%	651/26585/2662/392255/7044/151449/168667/654/9241/753/8200/7043/11117/7042/4838/653/4035/9573/11030/22943/1601/3623/7048/659/83729/57045/2660/7040/3625/657/353500/94/3624/7046/2022
GO:0050886	BP	endocrine process	84	0.516685	1.49642	0.000116765	0.00170341	0.00126538	5418	tags=55%, list=29%, signal=39%	185/1511/6869/6865/1215/1359/2587/554/654/1393/10699/552/114899/1816/183/5021/56670/5443/1910/2149/8322/2625/186/2697/51738/1601/3623/81285/51762/3952/59272/55503/1908/6196/2028/140606/1906/3625/668/3624/553/5345/1408/1394/4846/114897
GO:0060560	BP	developmental growth involved in morphogenesis	232	0.436768	1.3312	0.000116765	0.00170341	0.00126538	6911	tags=54%, list=37%, signal=35%	6422/2045/9353/6423/2255/22999/9201/91584/223117/63923/7143/6586/3897/57611/9423/9723/6860/2099/8153/4131/4137/23111/4692/4825/8128/10371/4133/6387/2258/6585/54413/1909/1630/9863/80031/5802/6456/9699/56920/6857/8828/2335/6356/5071/1901/3676/23769/4803/10439/66000/84258/57556/10500/4099/1826/127833/23566/10512/59284/54437/9856/53335/27185/8936/23499/51299/85407/7852/51199/9706/2246/7048/23767/659/…
GO:0002429	BP	immune response-activating cell surface receptor signaling pathway	220	0.434767	1.32251	0.000116765	0.00170341	0.00126538	6664	tags=54%, list=36%, signal=35%	1380/931/933/640/5579/1378/5063/115352/148823/26228/930/660/4208/2822/973/54900/1236/89857/3702/974/5788/9840/387357/695/55024/940/3071/50852/22914/952/23180/199920/79037/596/4068/2213/5293/10666/56244/5336/11126/8013/2533/1240/100423062/5142/7535/925/84106/2625/3543/8302/2219/100528032/2359/7409/4332/259197/64581/23228/84433/64005/5583/26191/53347/719/3824/4773/257144/4340/84174/9473/123920/926/…
GO:0002757	BP	immune response-activating signal transduction	220	0.434767	1.32251	0.000116765	0.00170341	0.00126538	6664	tags=54%, list=36%, signal=35%	1380/931/933/640/5579/1378/5063/115352/148823/26228/930/660/4208/2822/973/54900/1236/89857/3702/974/5788/9840/387357/695/55024/940/3071/50852/22914/952/23180/199920/79037/596/4068/2213/5293/10666/56244/5336/11126/8013/2533/1240/100423062/5142/7535/925/84106/2625/3543/8302/2219/100528032/2359/7409/4332/259197/64581/23228/84433/64005/5583/26191/53347/719/3824/4773/257144/4340/84174/9473/123920/926/…
GO:0050671	BP	positive regulation of lymphocyte proliferation	138	0.47317	1.40943	0.000119033	0.00173323	0.00128753	4781	tags=46%, list=26%, signal=35%	3479/6363/2255/6869/115352/4208/115650/5788/3481/729230/940/3071/912/952/7412/1880/959/3718/596/6504/1141/54440/3572/80380/3593/6708/7535/64926/7099/3567/923/3592/10148/7292/84433/30835/54106/26191/941/5588/4773/7048/3952/10673/6777/3558/604/4352/3594/916/683/79679/59067/958/3559/2214/84868/942/11151/149233/3109/10288/6352/199
GO:0019956	MF	chemokine binding	33	0.622115	1.67316	0.0001213	0.00175964	0.00130715	5396	tags=73%, list=29%, signal=52%	2532/643/2247/2/1233/1236/2829/1524/729230/3690/3676/1237/1234/10803/2826/1238/7852/1235/1230/10630/10663/3685/57007/3688
GO:1903524	BP	positive regulation of blood circulation	39	0.603065	1.65261	0.0001213	0.00175964	0.00130715	5339	tags=62%, list=29%, signal=44%	477/6262/55800/148/5999/1113/552/7042/146/1490/5997/100506013/51738/3270/7168/59272/5144/1908/1482/1906/4878/23493/6505/147
GO:0022824	MF	transmitter-gated ion channel activity	60	0.554562	1.56981	0.000123567	0.00178254	0.00132416	4985	tags=65%, list=27%, signal=48%	2901/2890/2903/1136/2899/2558/2894/2743/2567/2898/2891/2566/8001/8973/2900/2564/1141/1143/2893/2570/3359/2897/2561/2555/2895/2892/285242/2560/9177/116443/2741/2557/2562/2554/2904/1137/1142/2569/2742
GO:0022835	MF	transmitter-gated channel activity	60	0.554562	1.56981	0.000123567	0.00178254	0.00132416	4985	tags=65%, list=27%, signal=48%	2901/2890/2903/1136/2899/2558/2894/2743/2567/2898/2891/2566/8001/8973/2900/2564/1141/1143/2893/2570/3359/2897/2561/2555/2895/2892/285242/2560/9177/116443/2741/2557/2562/2554/2904/1137/1142/2569/2742
GO:0015108	MF	chloride transmembrane transporter activity	97	0.502144	1.46662	0.000123567	0.00178254	0.00132416	5564	tags=58%, list=30%, signal=41%	203859/2558/5348/2743/2567/1811/6559/2566/8001/1188/6530/1193/6557/2564/115111/94015/25932/121601/6571/57348/2570/6532/2561/54102/2568/1187/53405/2555/375611/7439/1080/2560/57101/6521/6560/1836/1179/56923/55879/2741/54831/2557/6531/2562/6529/6570/2554/2569/9635/1185/2742/9498/6505/9990/63982/5172
GO:0072171	BP	mesonephric tubule morphogenesis	64	0.541389	1.53709	0.000128102	0.0018411	0.00136767	3780	tags=44%, list=20%, signal=35%	26585/2247/2737/7484/7482/10736/2719/9241/6943/6608/2138/5087/8642/183/5311/596/7471/130497/2668/5727/170690/7475/80000/2625/186/2246/30812/3911
GO:0022409	BP	positive regulation of cell-cell adhesion	284	0.420465	1.29021	0.000128102	0.0018411	0.00136767	7009	tags=55%, list=38%, signal=35%	3479/7704/6363/22915/1511/6403/6366/1378/2737/1991/10563/115650/1236/5788/9840/3481/729230/2736/940/3071/912/22914/7412/3111/959/3676/81704/3718/6504/10125/6401/3575/11126/8013/54440/3572/1949/939/80380/4838/3112/114548/3707/3593/399/6708/7535/8728/6376/64926/51176/2625/2651/923/857/3592/10148/100528032/146850/7409/3117/7292/84433/30835/2113/3689/6657/240/26191/941/3586/51206/5588/7048/10859/3952…
GO:0051057	BP	positive regulation of small GTPase mediated signal transduction	69	0.531645	1.52018	0.000130369	0.00186334	0.00138418	6482	tags=67%, list=35%, signal=44%	3479/5649/2255/117/2840/84636/27334/5294/2843/286530/137735/4914/6091/2151/4803/2846/1281/1902/10125/5159/5923/2149/9290/3707/2841/8477/79933/7052/115727/9002/10161/4853/335/221938/1435/3685/401387/6654/10982/55914/4254/26053/11214/50650/157285/3084
GO:0009581	BP	detection of external stimulus	131	0.47504	1.41344	0.000130369	0.00186334	0.00138418	5741	tags=56%, list=31%, signal=39%	4804/3736/3356/54112/23349/3815/80036/114780/2294/1000/2898/5961/6387/6785/5957/2916/123041/63895/5158/4914/1258/5311/5270/168507/388531/51761/7222/23418/9293/7273/6323/24/54437/342372/10002/27039/10893/25861/117532/7852/5310/7442/7439/23621/5146/2534/859/131890/25769/6295/2792/6247/611/346007/79054/117531/3249/94233/134/222662/796/3000/2047/40/4923/6101/494513/7287/63982/56925/5132/2793/778
GO:0050954	BP	sensory perception of mechanical stimulus	172	0.457068	1.3784	0.000130369	0.00186334	0.00138418	4869	tags=42%, list=26%, signal=32%	3736/3356/1285/7275/23349/22953/93035/3815/2558/7007/65217/491/64072/2070/283310/55084/6387/9750/84189/57731/339768/246213/2138/63895/125336/4914/51473/7068/140469/5270/6899/1141/84530/6323/375323/53904/2561/51168/8322/1687/4919/9132/53405/4036/25861/375612/375611/117532/7852/53942/89797/7442/3753/23621/50617/26018/9381/525/6507/2917/146183/2534/152137/10750/117531/3249/1302/776/3198/222662/1428/…
GO:2000027	BP	regulation of animal organ morphogenesis	129	0.47344	1.40766	0.000132636	0.00188533	0.00140052	5547	tags=50%, list=30%, signal=35%	6422/4804/84870/340419/6423/26585/2255/2252/367/2247/4920/166336/7484/10082/7482/10736/144165/3082/2719/9241/79864/22881/9863/23213/51339/6608/57216/6091/183/6092/6899/5314/7074/2668/7476/140628/59277/8324/2625/4919/186/85407/57664/22943/1601/55966/2246/947/8321/30812/859/1906/657/27031/2535/115908/147495/1435/860/10252/6591/10370/51804/9620
GO:0042063	BP	gliogenesis	282	0.424864	1.30311	0.000132636	0.00188533	0.00140052	3305	tags=30%, list=18%, signal=25%	4653/1272/5354/4916/5649/5803/2255/5179/6900/2247/482/2596/64805/443/4920/26011/10100/2737/4915/10810/23500/26228/4137/8506/6547/4692/4825/9241/1000/163175/56978/3953/1524/2043/6608/5764/22891/1600/729230/4118/7223/6886/28999/54587/5453/1880/1812/5270/8929/1191/146433/1959/7042/2250/8941/4099/23418/6833/57165/5028/89927/3572/1464/7732/3400/6376/7099/55553/135/9639/51176/10893/4919/1436/27185/4036…
GO:1903037	BP	regulation of leukocyte cell-cell adhesion	326	0.414081	1.27424	0.000132636	0.00188533	0.00140052	7095	tags=53%, list=38%, signal=34%	3479/7704/6363/1511/6403/6366/1378/2737/1991/10875/26279/54900/115650/1236/5788/6387/9840/9750/3481/6441/729230/2736/940/387597/3071/912/22914/7412/3111/959/3676/10457/81704/3718/56253/2615/2213/6504/10125/6401/3575/8654/339390/11126/8013/54440/3572/1949/939/201633/80380/6693/3112/114548/3707/3593/399/6708/7535/64926/135/51176/2625/923/857/3592/10148/100528032/146850/7409/3117/7292/84433/30835/21…
GO:1903779	BP	regulation of cardiac conduction	25	0.658105	1.71452	0.000135444	0.00192173	0.00142756	4086	tags=68%, list=22%, signal=53%	287/6543/6262/7220/491/6547/6546/10699/492/493/183/6910/30845/2702/59272/51086/1482
GO:0032835	BP	glomerulus development	65	0.542902	1.54391	0.000139438	0.00197118	0.00146429	4403	tags=55%, list=24%, signal=42%	1285/1286/84623/59/9370/284/4208/5979/9241/25937/6943/1909/5156/9863/23213/26508/7010/28999/4868/596/80310/1910/5159/2303/130497/5175/186/3570/4854/4811/947/4853/9788/3913/2028/10409
GO:1903035	BP	negative regulation of response to wounding	85	0.509754	1.47602	0.000139438	0.00197118	0.00146429	5728	tags=58%, list=31%, signal=40%	56963/22915/7143/2247/170692/5592/90102/7057/5156/710/2043/135228/5802/2191/5270/5627/146760/6833/25817/89790/149461/2811/7448/9856/3818/58189/240/55966/3848/5340/947/58529/2160/239/7056/18/1906/5054/348/10019/5345/7035/4846/23332/114897/3827/5327/22876/2147
GO:0019229	BP	regulation of vasoconstriction	63	0.549904	1.56048	0.000141705	0.00199596	0.0014827	5017	tags=60%, list=27%, signal=44%	477/185/3356/6869/3741/10800/554/148/5023/552/342527/952/183/5021/1621/4313/3274/2149/10242/146/219537/9732/1131/857/2702/659/3952/59272/6915/1908/846/27345/1906/150/151/553/40/6640
GO:0015698	BP	inorganic anion transport	180	0.452247	1.3648	0.000141705	0.00199596	0.0014827	6767	tags=55%, list=36%, signal=35%	6424/11095/10060/203859/2558/5348/57030/2743/2567/6508/5243/10316/1811/6559/2566/8001/1188/1193/6557/2564/115111/94015/25932/121601/26266/57348/2570/7038/2561/54102/2568/57282/1187/83697/84230/53405/2555/375611/219855/7439/55867/1080/5167/6507/2560/57101/28962/6521/846/6560/1836/1179/56923/55879/2741/54831/2557/5593/2562/6561/6529/2554/10786/2569/8671/9635/1185/2742/6528/9498/1408/6505/1244/9990/…
GO:0000054	BP	ribosomal subunit export from nucleus	14	-0.598149	-2.28744	0.000144162	0.00202322	0.00150295	7485	tags=100%, list=40%, signal=60%	7514/55341/55781/51068/161424/84946/4927/6059/5901/4869/23212/3692/6209
GO:0033750	BP	ribosome localization	14	-0.598149	-2.28744	0.000144162	0.00202322	0.00150295	7485	tags=100%, list=40%, signal=60%	7514/55341/55781/51068/161424/84946/4927/6059/5901/4869/23212/3692/6209
GO:1903039	BP	positive regulation of leukocyte cell-cell adhesion	238	0.429959	1.31131	0.000146239	0.00204867	0.00152186	6859	tags=55%, list=37%, signal=35%	3479/7704/6363/6403/6366/1378/2737/1991/115650/1236/5788/9840/3481/729230/2736/940/3071/912/22914/7412/3111/959/3676/81704/3718/6504/10125/6401/3575/11126/8013/54440/3572/1949/939/80380/3112/114548/3707/3593/399/6708/7535/64926/51176/2625/923/857/3592/10148/100528032/146850/7409/3117/7292/84433/30835/2113/3689/240/26191/941/5588/7048/10859/3952/8740/10673/29851/921/10164/6777/2534/1960/3558/920/6…
GO:1903034	BP	regulation of response to wounding	152	0.459585	1.37803	0.000148507	0.00207668	0.00154267	5728	tags=49%, list=31%, signal=34%	56963/22915/4638/64094/7143/2247/170692/2316/59/10979/5592/90102/7057/5156/710/2043/5764/135228/5802/2191/948/5270/5627/146760/8840/6833/25817/2303/2149/89790/149461/2811/7448/9856/3818/857/58189/64581/7852/240/55966/3586/3848/5340/947/58529/8613/6915/2160/239/7056/7128/6484/18/1906/2155/5054/23189/150/348/10019/8578/5345/9076/3480/7035/4846/23332/3688/114897/3827/5327/22876/2147
GO:0035590	BP	purinergic nucleotide receptor signaling pathway	33	0.619496	1.66612	0.000150774	0.00209705	0.0015578	2984	tags=52%, list=16%, signal=43%	111/1511/6900/22953/64805/9934/27334/286530/5023/2857/5027/53829/5028/9127/29909/135/5026
GO:0060389	BP	pathway-restricted SMAD protein phosphorylation	63	0.54861	1.55681	0.000150774	0.00209705	0.0015578	5060	tags=59%, list=27%, signal=43%	651/26585/2662/392255/7044/151449/168667/654/9241/753/8200/7049/7043/11117/7042/269/4838/653/4035/9573/11030/22943/1601/3623/7048/659/83729/57045/2660/7040/3625/657/353500/94/3624/7046/2022
GO:0003007	BP	heart morphogenesis	246	0.426882	1.30293	0.000150774	0.00209705	0.0015578	5718	tags=47%, list=31%, signal=33%	9464/9353/4886/6423/55273/23768/51676/2006/6586/23414/6262/1363/2316/8854/70/4208/4634/9241/2294/9510/1909/57493/7049/6608/26508/2138/7010/57216/8828/115701/8642/1901/6091/5311/3357/10439/6092/6899/6910/7042/6261/10395/3670/7122/4889/2303/57057/140706/5727/10512/7273/4838/140628/6604/51384/2625/187/79933/653/4036/2697/8701/22943/64321/5308/65009/7048/1289/2702/7168/659/4853/8321/8829/2263/859/595…
GO:0085029	BP	extracellular matrix assembly	45	0.576623	1.60029	0.000153041	0.00212099	0.00157558	5380	tags=64%, list=29%, signal=46%	4629/7148/4239/22854/10516/90102/3036/84168/11117/79875/183/2824/1281/4054/30008/84628/59277/23187/1278/7075/7040/3913/4015/10266/3912/3037/22798/7837/23332
GO:0030509	BP	BMP signaling pathway	156	0.459326	1.38027	0.000153041	0.00212099	0.00157558	5114	tags=45%, list=27%, signal=33%	91851/64388/6422/56963/6424/6423/26585/1311/55273/392255/7044/151449/494470/168667/348093/4920/23090/4093/222223/2200/375567/23111/2719/654/9241/658/6425/8200/23213/7049/7043/8646/222663/11167/25928/7471/7042/57057/4838/199699/286204/51176/653/4036/164656/9573/22943/1003/659/94031/4853/8321/8287/57045/7040/3491/7554/657/353500/285704/1954/148738/3791/94/3611/10272/6498/2022/860/51232
GO:0033674	BP	positive regulation of kinase activity	468	0.397318	1.23463	0.000155308	0.00214857	0.00159607	7970	tags=54%, list=43%, signal=32%	4593/2045/4916/3479/116/5649/26585/6363/8115/3356/10178/6366/2042/2247/120892/285220/9607/2690/1136/4921/64805/6543/4920/3815/2322/1991/4915/26228/128344/4057/9370/388121/10979/5587/4137/284/2066/9770/930/5294/148/238/5979/10718/1236/1795/7057/5788/658/2258/5156/3481/2043/154/2260/1600/3071/493/2044/7010/6886/3690/4914/6622/23533/10333/959/6091/183/5311/3357/1813/7436/80310/389658/1191/146433/704…
GO:0048483	BP	autonomic nervous system development	47	0.57694	1.60805	0.000157576	0.00217606	0.00161648	6631	tags=77%, list=36%, signal=49%	9464/91584/2676/5979/10371/1909/8828/4914/7412/2335/401/3642/8929/6899/1959/8626/1910/2668/104/2625/89797/30812/8829/91464/3211/429/26153/3212/158800/57007/3196/6664/7021/3142/7976/170302
GO:0032977	MF	membrane insertase activity	14	-0.593362	-2.26913	0.000158001	0.00217806	0.00161797	7574	tags=100%, list=41%, signal=59%	9694/23065/51234/285521/55831/284361/5018/56851/26520/10328/51016/83460/26519
GO:0050863	BP	regulation of T cell activation	332	0.412945	1.27131	0.000159843	0.00219954	0.00163393	7433	tags=55%, list=40%, signal=34%	3479/7704/6363/1511/6366/4004/1378/2737/10875/6935/26279/944/54900/115650/814/1236/5788/9840/9750/3481/6441/729230/2736/940/387597/3071/912/22914/3662/7412/3111/959/10457/81704/3718/8995/9479/56253/2615/9760/2213/6504/10125/3575/8654/339390/11126/1178/54440/3572/1949/939/201633/80380/6693/3112/114548/3707/3593/399/6708/7535/64926/135/51176/2625/923/27040/857/3592/10148/100528032/146850/7409/3117/…
GO:0008066	MF	glutamate receptor activity	27	0.643365	1.68459	0.000160484	0.00220445	0.00163758	4751	tags=74%, list=26%, signal=55%	2901/2890/2903/2899/2894/2898/2891/2916/2900/2913/2893/2897/2895/2892/2911/2914/2917/116443/2904/2912
GO:0000176	CC	nuclear exosome (RNase complex)	12	-0.620408	-2.34289	0.000161756	0.002218	0.00164764	7070	tags=100%, list=38%, signal=62%	118460/5394/10438/51010/23404/5393/51013/23016/11340/56915/54512
GO:2000300	BP	regulation of synaptic vesicle exocytosis	55	0.553357	1.55835	0.00016211	0.00221893	0.00164834	5520	tags=58%, list=30%, signal=41%	1268/22871/3356/120892/5579/6860/783/140730/148/5023/6857/8973/1812/5582/1813/9783/5028/5413/7476/320/135/107/23621/116443/6853/150/1142/9498/5217/84961/5030/6855
GO:0046933	MF	proton-transporting ATP synthase activity, rotational mechanism	14	-0.592018	-2.264	0.000162614	0.00222192	0.00165056	3073	tags=93%, list=17%, signal=78%	498/522/515/539/10632/514/527/509/10476/506/521/9551/513
GO:1990138	BP	neuron projection extension	171	0.450646	1.35819	0.000164377	0.00224206	0.00166552	6182	tags=52%, list=33%, signal=35%	9353/22999/9201/91584/223117/63923/7143/6586/3897/57611/9423/9723/6860/4131/4137/4692/4825/8128/10371/4133/6387/6585/54413/1909/80031/5802/6456/9699/56920/6857/8828/2335/5071/3676/23769/10439/66000/84258/57556/10500/4099/1826/127833/10512/59284/54437/9856/53335/27185/8936/23499/51299/7852/9706/23767/659/26999/8829/23025/1908/344901/9576/7224/3913/6792/1808/1906/9037/1002/57699/9962/1954/7414/348/…
GO:0061135	MF	endopeptidase regulator activity	187	0.440989	1.33304	0.000166645	0.00226502	0.00168257	6337	tags=46%, list=34%, signal=31%	6423/1285/89932/80760/721/6695/3699/718/27344/720/124857/8434/4057/2/7078/5858/327657/7980/710/135228/1470/6622/27151/5176/183/5270/4803/5627/22861/1293/3730/50859/6691/7077/4671/5104/3698/939/9806/144568/4018/286204/1473/58189/12/199713/284293/8740/5272/11005/83464/22900/5918/197/164237/3700/25816/647174/58484/5054/3053/1474/5345/347365/51232/5276/6093/7035/5273/10406/8530/5973/3827/56925/7079/5…
GO:0043491	BP	protein kinase B signaling	189	0.439266	1.32872	0.000166645	0.00226502	0.00168257	5654	tags=44%, list=30%, signal=31%	4653/4916/3479/6363/55273/6366/2247/64805/143686/4915/3488/388121/10979/284/5294/5979/1236/7057/6425/2852/1524/85453/3481/9863/55024/2260/940/7010/4914/23533/1813/5314/5293/558/23551/93492/4922/7066/6376/57091/56917/2625/1950/2651/4036/10461/375033/3059/50507/2159/799/10268/3952/1411/859/2660/7040/6347/4015/3092/958/5290/9037/2155/3791/3611/6352/1646/2912/7046/55801/253260/10385/10019/2022/3480/1…
GO:0097503	BP	sialylation	20	0.695617	1.77202	0.00016993	0.00230565	0.00171275	4948	tags=80%, list=27%, signal=59%	84620/338596/81849/6489/8128/51046/256435/7903/8869/6480/6487/29906/6484/30815/6483/10402
GO:0045263	CC	proton-transporting ATP synthase complex, coupling factor F(o)	12	-0.617575	-2.33219	0.000170826	0.00230972	0.00171578	3224	tags=92%, list=17%, signal=76%	267020/522/515/539/10632/517/10476/518/521/516/9551
GO:0043248	BP	proteasome assembly	12	-0.616481	-2.32806	0.000170826	0.00230972	0.00171578	7143	tags=100%, list=38%, signal=62%	51633/5711/5715/5716/5717/56984/389362/51371/11047/8624/84262
GO:0097428	BP	protein maturation by iron-sulfur cluster transfer	15	-0.572843	-2.25182	0.00018202	0.0024568	0.00182504	7956	tags=100%, list=43%, signal=57%	81689/64210/27247/150274/9391/64110/10539/57002/122961/84191/51218/51647/654483/284106
GO:0031314	CC	extrinsic component of mitochondrial inner membrane	14	-0.588628	-2.25103	0.000183373	0.00247077	0.00183541	7662	tags=100%, list=41%, signal=59%	10229/79934/56997/79133/132001/51004/51025/84274/91419/84273/37/51805/51117
GO:0043394	MF	proteoglycan binding	36	0.590355	1.60396	0.000184782	0.00248544	0.00184631	3722	tags=56%, list=20%, signal=45%	9353/1311/60495/26279/3075/7057/5788/6585/3371/5802/2335/10457/51816/1513/4035/129804/4023/4811/1289/26281
GO:1904861	BP	excitatory synapse assembly	25	0.652787	1.70066	0.000185524	0.00249109	0.00185051	3512	tags=60%, list=19%, signal=49%	4916/22871/4884/22865/9378/9379/5789/869/94030/57555/26045/7476/85358/2895/64101
GO:0007162	BP	negative regulation of cell adhesion	282	0.421961	1.29421	0.000189317	0.00253763	0.00188508	6292	tags=49%, list=34%, signal=33%	4653/340533/1545/347/1511/91584/2192/6366/7143/1378/9723/11170/2737/6695/170692/10875/168002/9370/284/5592/26279/90102/10391/54900/83700/654/7057/5788/6387/9750/2043/6441/1600/387597/3071/10154/395/10457/3718/5270/56253/2615/2213/53616/5962/7471/10395/57556/8654/4313/339390/1826/201633/80380/6693/6376/135/8324/8322/2651/7292/5140/282618/26191/30009/55966/23240/941/3586/2267/5340/10859/349633/1132…
GO:0048678	BP	response to axon injury	77	0.524159	1.51089	0.000191584	0.00256359	0.00190437	5149	tags=51%, list=28%, signal=37%	56963/4916/347/4747/3776/7143/2247/1809/2596/64805/2316/4131/5122/2043/5764/5802/4914/596/1813/146760/337/2695/5336/4313/4099/3670/9856/23767/9315/3913/4548/383/23098/2348/199/54209/8578/3480/6505
GO:0008083	MF	growth factor activity	157	0.458337	1.37814	0.000196119	0.00261975	0.00194609	5841	tags=47%, list=31%, signal=33%	4969/7060/651/3479/2255/2252/2662/392255/2259/7044/2247/151449/2202/2277/3082/10718/654/6387/2258/9542/8200/3481/5764/7043/4856/50810/183/2254/4803/51816/80310/146433/7042/2250/2668/1490/7066/4838/3593/7424/3567/1950/653/3592/9573/8823/22943/56034/3623/3586/2246/8909/26281/4909/83729/3558/2660/7040/6320/2257/3625/353500/3624/8190/84432/1435/9535/3626/10220/8822/2147/8817/3565/9135
GO:0061134	MF	peptidase regulator activity	221	0.431236	1.31124	0.000198386	0.00264549	0.0019652	6337	tags=45%, list=34%, signal=30%	221476/6423/1285/2192/89932/80760/721/6695/3699/718/27344/720/124857/8434/4057/2/7078/2719/5858/327657/51050/7980/710/135228/1470/4118/2335/6622/27151/5176/183/5270/4803/5627/22861/1293/3730/50859/6691/7077/26577/4671/5104/3698/939/9806/144568/4018/286204/857/1473/58189/12/199713/284293/8740/5272/10392/11005/83464/91662/22900/5918/197/5118/164237/3700/25816/647174/58484/5054/3053/1474/5345/27018/…
GO:0033691	MF	sialic acid binding	21	0.678635	1.74005	0.000199582	0.00265687	0.00197366	4177	tags=76%, list=22%, signal=59%	6403/946/933/9370/8128/27181/51046/6401/4099/89790/7903/2219/114132/945/100049587/27036
GO:0005245	MF	voltage-gated calcium channel activity	45	0.572195	1.588	0.000200653	0.00266656	0.00198085	4576	tags=64%, list=25%, signal=49%	1268/27092/785/783/774/8912/775/777/781/55799/8913/5311/6261/9256/786/23413/8911/59284/59285/779/773/117532/7442/4988/9254/57685/255022/117531/776
GO:0086012	BP	membrane depolarization during cardiac muscle cell action potential	21	0.678337	1.73928	0.000201863	0.00267805	0.00198939	2726	tags=62%, list=15%, signal=53%	477/287/6327/6330/783/55800/775/781/6546/8913/6331/10021/6324
GO:0016849	MF	phosphorus-oxygen lyase activity	23	0.665882	1.72577	0.000203939	0.00270097	0.00200642	4815	tags=74%, list=26%, signal=55%	111/108/2982/2983/4881/952/2977/4882/107/196883/113/683/114/3000/4337/55811/115
GO:0005003	MF	ephrin receptor activity	19	0.696952	1.76002	0.000206841	0.00272516	0.00202439	2447	tags=47%, list=13%, signal=41%	2045/4916/2042/285220/2043/2044/4914/2051/1949
GO:0005179	MF	hormone activity	114	0.480633	1.42187	0.000207455	0.00272516	0.00202439	5808	tags=51%, list=31%, signal=35%	7432/3479/116/5179/9607/6750/1114/252995/2200/9370/4880/9365/4295/5368/3481/4852/80763/183/7276/257313/5744/5443/2695/7038/4922/7066/2641/2922/338872/6343/797/100506013/114131/51738/3623/3952/83729/1908/94027/344901/181/7252/2796/1906/5697/3625/4878/796/55908/3624/6013/5539/7200/6019/3626/57817/434/5020
GO:0009612	BP	response to mechanical stimulus	201	0.4414	1.33734	0.000207455	0.00272516	0.00202439	5572	tags=46%, list=30%, signal=33%	477/3736/3356/9378/3776/23349/6869/9379/1756/3815/6262/3741/4131/51284/654/114780/1000/5138/6546/7057/6387/84189/8200/5764/63895/4914/183/5311/5270/3746/1813/51311/168507/51761/4313/4099/497189/5027/5028/5727/7273/6323/441027/342372/7099/27039/9856/358/4353/25861/375611/117532/85358/7852/10628/64220/5310/7100/23621/7048/2934/8740/2354/6507/623/2534/859/943/958/4212/5290/2115/1906/117531/3249/4878…
GO:0005523	MF	tropomyosin binding	15	0.732172	1.78688	0.00020748	0.00272516	0.00202439	2637	tags=53%, list=14%, signal=46%	25802/7111/7140/800/342527/29767/56203/219537
GO:0099144	CC	anchored component of synaptic membrane	10	0.798669	1.82912	0.000207521	0.00272516	0.00202439	3261	tags=80%, list=18%, signal=66%	1272/6900/401190/22854/1742/84628/27255/53942
GO:0031125	BP	rRNA 3'-end processing	10	-0.654063	-2.23148	0.000209859	0.00275121	0.00204374	6443	tags=100%, list=35%, signal=65%	90459/5394/51010/23404/5393/79033/23016/11340/6227
GO:0006821	BP	chloride transport	109	0.480204	1.41426	0.000214257	0.00280412	0.00208304	6767	tags=62%, list=36%, signal=40%	203859/2558/5348/2743/2567/5243/10316/1811/6559/2566/8001/1188/1193/6557/2564/115111/94015/25932/121601/57348/2570/2561/54102/2568/57282/1187/53405/2555/375611/7439/1080/6507/2560/57101/28962/6521/846/6560/1836/1179/55879/2741/54831/2557/5593/2562/6529/2554/2569/9635/1185/2742/9498/6505/9990/5030/63982/5172/766/5621/5031/196527/266675/2556/116369/2915/5724/55107
GO:0050431	MF	transforming growth factor beta binding	24	0.654961	1.70255	0.000217611	0.00284323	0.00211209	5182	tags=75%, list=28%, signal=54%	4052/124857/7057/7049/135228/7043/948/2615/4054/8425/375387/7048/57045/94/114990/7046/2022/3685
GO:0072163	BP	mesonephric epithelium development	95	0.497066	1.45019	0.000218791	0.00284428	0.00211288	3848	tags=40%, list=21%, signal=32%	6422/9353/26585/2247/168667/2737/7484/7482/10736/2719/5979/9241/9244/6943/6608/2138/5087/8642/183/5311/596/6092/7471/2303/130497/2668/5727/170690/7475/5915/80000/2625/186/5310/2246/30812/3911/2263
GO:0072164	BP	mesonephric tubule development	95	0.497066	1.45019	0.000218791	0.00284428	0.00211288	3848	tags=40%, list=21%, signal=32%	6422/9353/26585/2247/168667/2737/7484/7482/10736/2719/5979/9241/9244/6943/6608/2138/5087/8642/183/5311/596/6092/7471/2303/130497/2668/5727/170690/7475/5915/80000/2625/186/5310/2246/30812/3911/2263
GO:0098656	BP	anion transmembrane transport	245	0.42186	1.28744	0.000218791	0.00284428	0.00211288	7150	tags=52%, list=38%, signal=32%	477/11095/203859/2558/6542/57030/57419/2743/285195/2567/6508/5243/84889/9194/5999/387700/1811/6559/6506/2566/123041/246213/8001/6512/1193/183/6557/2564/115111/121601/26266/2570/2350/10864/6511/5997/2561/160728/2568/57282/6519/83697/114571/84230/4036/2555/375611/2697/9058/285335/2670/55244/219855/7439/1080/2911/59272/6507/120103/2560/57101/6521/846/9963/6560/159963/1836/25769/55879/2741/2557/2562/…
GO:0002688	BP	regulation of leukocyte chemotaxis	122	0.466736	1.38534	0.000221058	0.00286895	0.0021312	6415	tags=55%, list=34%, signal=36%	7060/9353/26585/6363/6366/2277/26228/10563/83700/1236/245937/7057/6387/1524/9750/5764/729230/4856/3071/22914/57118/146433/6504/11240/1240/2841/7424/1436/3592/100528032/3570/719/1235/8740/23075/728/1588/1908/2660/1230/27202/6347/683/1843/6846/4354/1906/2155/5054/6352/5919/79890/199/64127/1435/56833/6375/7941/3565/3929/727/196527/6688/2621/6868/57509/158747
GO:0042311	BP	vasodilation	46	0.563588	1.5672	0.000223326	0.00289354	0.00214947	5519	tags=59%, list=30%, signal=41%	3778/4842/2982/4883/3779/155/196740/5592/2852/154/1812/183/3672/1910/5997/135/186/2702/846/4878/134/796/150/348/1373/4846/3827
GO:0043583	BP	ear development	216	0.431799	1.31205	0.000225593	0.00291319	0.00216406	5174	tags=42%, list=28%, signal=30%	4916/2255/3776/168667/4920/8516/9423/2558/3777/2737/2487/579/9890/65217/341640/6935/10736/220/64072/2070/9096/5396/9241/55084/84189/1909/2043/7043/246213/2138/3199/8642/140469/2254/596/8929/6899/7471/7042/51761/4094/497189/9935/5159/8825/130497/53904/2561/51168/55283/1687/2625/4919/9132/653/25861/2103/375611/64220/6657/54360/26018/5816/525/26281/6939/80184/2263/357/4760/2299/340784/2290/2624/8549…
GO:0001819	BP	positive regulation of cytokine production	457	0.391848	1.21661	0.000225593	0.00291319	0.00216406	7017	tags=49%, list=38%, signal=32%	1545/116/6363/120892/90865/3815/9590/1991/718/117854/9971/9370/51284/4063/3082/5294/85480/541468/1236/3702/64109/6095/245937/7057/5788/388325/3603/3554/114900/57493/23213/729230/940/4060/114899/149628/26137/22914/3662/114836/9173/116449/10333/959/8832/948/23180/7096/183/3357/22861/1813/23705/283420/326/4776/1191/56253/51311/6504/5293/10666/10125/5336/3670/11126/6833/5450/5027/5452/8013/2149/54440…
GO:0010469	BP	regulation of signaling receptor activity	156	0.456392	1.37145	0.000230127	0.00296189	0.00220024	6601	tags=55%, list=35%, signal=36%	64388/22871/5649/4884/26585/729993/27092/151647/23467/124857/9228/4208/50944/9241/1393/23641/54413/27123/154/729230/9229/123041/388336/66004/2213/57555/25927/387837/5923/5028/27120/59284/1742/440829/5924/1950/186/85358/799/22943/4885/27122/653361/3586/4988/10268/59272/146395/8829/5144/859/2100/4062/11006/6347/1906/134/130574/729956/5054/81832/54800/150/151/10068/80863/8202/636/23542/9655/3688/399…
GO:0031345	BP	negative regulation of cell projection organization	181	0.440714	1.33055	0.000230127	0.00296189	0.00220024	7020	tags=54%, list=38%, signal=34%	2045/56963/9353/22871/11075/223117/6366/7143/120892/1809/9423/9723/6695/7025/26228/2316/23111/10371/4133/2258/6585/1630/2043/80031/22891/1600/5802/56920/952/51466/146760/4776/23258/1902/57556/10500/4168/1400/4099/4117/10512/1949/54437/9856/53335/83478/26052/112755/2670/9706/22943/1601/5376/7431/5365/8829/2534/7224/8831/2672/9037/57489/7070/2904/23189/348/22902/5217/10251/51265/393/54910/5793/4038…
GO:0001964	BP	startle response	24	0.653709	1.69929	0.000231283	0.00297183	0.00220762	4337	tags=67%, list=23%, signal=51%	3736/5179/2903/64478/2743/84189/1496/5071/1812/1813/135/2895/23621/116443/2741/6531
GO:0090100	BP	positive regulation of transmembrane receptor protein serine/threonine kinase signaling pathway	114	0.478551	1.41571	0.000234684	0.00301055	0.00223639	6547	tags=54%, list=35%, signal=35%	651/93649/2662/392255/7044/151449/494470/8516/23090/222223/2719/9839/654/7057/8200/23213/7049/7043/222663/2254/7042/7041/57057/4838/286204/9856/653/9573/11030/1601/1030/3623/1003/7048/659/4853/83729/57045/2660/7040/3491/1028/3625/657/353500/3791/94/3611/3624/7046/2022/3626/10370/10220/201163/4756/255743/6664/6868/90/3717/1387
GO:0008045	BP	motor neuron axon guidance	30	0.624858	1.66083	0.000239241	0.00305386	0.00226856	3831	tags=57%, list=21%, signal=45%	9353/91584/494470/9423/4917/9241/10371/6585/2043/3800/3199/1959/399/126147/1123/8577/8829
GO:0002062	BP	chondrocyte differentiation	109	0.478574	1.40946	0.000239241	0.00305386	0.00226856	6342	tags=58%, list=34%, signal=38%	7704/6423/26585/1311/392255/2202/2737/579/7482/6660/10736/4880/7483/4208/5745/2822/654/7227/658/8200/23213/4856/2254/5744/1281/8840/4094/130497/4054/7480/1490/7476/5915/55553/309/54360/7048/659/864/7040/50515/64764/657/94/7046/4146/4781/860/359845/81792/389125/6591/6474/55959/91461/10865/8817/7045/11173/57560/1280/22856/4209
GO:0009925	CC	basal plasma membrane	248	0.424472	1.29602	0.000239241	0.00305386	0.00226856	6012	tags=46%, list=32%, signal=32%	10351/287/6543/1740/3680/5064/196500/491/2066/146894/353189/5745/338328/6563/1000/3953/7018/361/387700/53919/4547/7223/493/7010/912/952/115701/5311/23705/115111/667/57554/4671/3773/8825/5028/7253/123264/149461/10864/57282/1131/83697/358/84465/9132/114571/4035/57477/375611/4478/5310/54106/55244/7439/55966/65009/947/5167/9381/8613/525/6507/728/10392/6521/846/9963/2054/6554/23209/27202/4359/114/1132…
GO:0070202	BP	regulation of establishment of protein localization to chromosome	12	-0.606638	-2.29089	0.000246411	0.00314022	0.00233271	7326	tags=100%, list=39%, signal=61%	7013/6950/908/10575/55135/10576/10694/7203/22948/10574/1736
GO:0032640	BP	tumor necrosis factor production	159	0.452274	1.36048	0.000248355	0.00315463	0.00234342	6814	tags=56%, list=37%, signal=36%	3479/6363/120892/90865/9590/23547/9971/4057/9370/284/23208/671/7057/5788/1524/114900/729230/26137/197358/8832/948/7096/10457/4776/1191/6504/5443/558/10125/5336/3670/6833/54440/6693/3593/2841/6376/1149/1536/7099/11213/64581/4023/51738/54106/26191/945/914/3586/10859/947/3952/23643/10392/23586/7128/11006/27202/5295/943/84868/11027/54209/64127/7291/566/140885/50856/10865/113277/54206/3565/7097/3929/5…
GO:0032680	BP	regulation of tumor necrosis factor production	159	0.452274	1.36048	0.000248355	0.00315463	0.00234342	6814	tags=56%, list=37%, signal=36%	3479/6363/120892/90865/9590/23547/9971/4057/9370/284/23208/671/7057/5788/1524/114900/729230/26137/197358/8832/948/7096/10457/4776/1191/6504/5443/558/10125/5336/3670/6833/54440/6693/3593/2841/6376/1149/1536/7099/11213/64581/4023/51738/54106/26191/945/914/3586/10859/947/3952/23643/10392/23586/7128/11006/27202/5295/943/84868/11027/54209/64127/7291/566/140885/50856/10865/113277/54206/3565/7097/3929/5…
GO:0032720	BP	negative regulation of tumor necrosis factor production	60	0.541597	1.53311	0.000252911	0.00320726	0.00238252	6365	tags=67%, list=34%, signal=44%	3479/23547/9971/9370/23208/671/197358/10457/6504/5443/558/2841/6376/1149/7099/11213/51738/26191/945/3586/10859/947/7128/11006/27202/84868/54209/64127/7291/140885/50856/54206/3565/3929/50943/2693/2621/64115/1139/4157
GO:1990868	BP	response to chemokine	95	0.495886	1.44674	0.000257468	0.00325442	0.00241754	5192	tags=51%, list=28%, signal=37%	9353/6363/2532/6366/643/2840/6586/6358/10563/1233/1236/2829/6387/1524/9750/6360/729230/6356/6091/81704/6368/1237/1234/10803/11240/1240/7066/6376/6367/2826/1238/7852/10936/1235/6357/4283/4352/1230/6347/1843/4015/6846/1906/6352/54209/10019/10663/57007
GO:1990869	BP	cellular response to chemokine	95	0.495886	1.44674	0.000257468	0.00325442	0.00241754	5192	tags=51%, list=28%, signal=37%	9353/6363/2532/6366/643/2840/6586/6358/10563/1233/1236/2829/6387/1524/9750/6360/729230/6356/6091/81704/6368/1237/1234/10803/11240/1240/7066/6376/6367/2826/1238/7852/10936/1235/6357/4283/4352/1230/6347/1843/4015/6846/1906/6352/54209/10019/10663/57007
GO:1903405	BP	protein localization to nuclear body	12	-0.604916	-2.28439	0.000264551	0.00333309	0.00247599	7358	tags=92%, list=40%, signal=55%	6950/56257/908/10575/55135/10576/10694/7203/22948/10574/1736
GO:1904867	BP	protein localization to Cajal body	12	-0.604916	-2.28439	0.000264551	0.00333309	0.00247599	7358	tags=92%, list=40%, signal=55%	6950/56257/908/10575/55135/10576/10694/7203/22948/10574/1736
GO:0070839	BP	metal ion export	45	0.567039	1.57369	0.000266582	0.003337	0.0024789	2090	tags=36%, list=11%, signal=32%	477/3745/343450/482/6543/3741/3737/5348/23704/480/6546/3757/492/123041/486/3752
GO:0055013	BP	cardiac muscle cell development	73	0.520698	1.4945	0.000266582	0.003337	0.0024789	4772	tags=47%, list=26%, signal=35%	4629/221476/3479/88/51676/9472/11149/6444/80206/70/148/9096/6546/5999/5156/57538/23363/115701/183/6910/8470/91807/3670/5159/7273/5997/84700/4703/4205/859/1482/1906/657/23493
GO:0035051	BP	cardiocyte differentiation	135	0.463325	1.37944	0.000266582	0.003337	0.0024789	4116	tags=39%, list=22%, signal=30%	4629/9464/221476/3479/26585/88/93649/51676/9472/11149/6444/26011/80206/144165/70/4208/148/9096/6546/8320/5999/2852/1909/5156/7049/57538/23363/115701/7412/183/6910/7042/8470/91807/3670/5159/10512/7273/5915/5997/55553/8324/50507/22943/84700/64321/5308/4703/4205/859/1482/7040
GO:0010976	BP	positive regulation of neuron projection development	144	0.456878	1.36467	0.000266582	0.003337	0.0024789	5970	tags=50%, list=32%, signal=34%	1268/1272/4916/5649/11075/257194/2042/158866/1809/482/4920/5063/4915/2316/55714/79625/5587/3082/238/5979/23316/1996/9863/5764/4914/57118/9638/91752/5176/183/7436/389658/816/9760/51761/57554/29993/411/6376/5997/6324/57463/4919/27185/653/10690/65009/10677/8321/5365/126520/2534/2242/163404/285016/440730/64764/80823/348/65981/8578/57498/3480/27/221914/8837/23064/2889/9693/8536/25/5274
GO:0043271	BP	negative regulation of ion transport	134	0.463597	1.3797	0.000271139	0.0033777	0.00250913	5556	tags=48%, list=30%, signal=34%	1268/477/845/7432/5350/6424/88/3356/4842/65267/23208/23704/5999/3757/6236/2550/2669/6622/1193/5311/5270/2564/2824/596/1813/2946/4129/4987/28954/4889/130497/22925/3792/5997/857/375611/54106/3753/945/7881/23072/10859/3952/2917/57520/859/4734/5593/10681/18/134/10288/150/10345/285966/4923/7291/1394/7200/91404/4846/23630/57817/288
GO:0048771	BP	tissue remodeling	160	0.451755	1.35972	0.000271139	0.0033777	0.00250913	5638	tags=47%, list=30%, signal=33%	7060/6422/9464/84870/26585/2255/9607/4921/5166/3488/2316/9770/4208/5745/3953/7018/8200/1909/338773/154/5764/729230/7043/952/3690/1901/10457/183/645811/558/1621/4313/23418/5027/4286/2303/2149/4054/10512/9290/1464/3593/51384/1513/1436/857/186/50507/2697/7075/4160/5340/659/3952/3200/4853/3558/2324/7128/81501/7040/383/59067/796/94/115908/3635/2034/6093/79705/4846/171392/3600/57817/8600
GO:0010720	BP	positive regulation of cell development	290	0.417729	1.28301	0.000271139	0.0033777	0.00250913	5032	tags=40%, list=27%, signal=29%	4653/9353/5649/5803/91584/4747/5139/4135/443/3897/5063/26011/57611/9423/3815/2737/140578/4915/5789/2316/8153/9370/4131/10979/4137/55679/85458/4825/5979/1638/6387/23316/2852/1524/2043/6608/5764/22891/89/10154/11141/23363/2335/5176/6091/5270/4803/596/1813/6092/146433/1959/816/56203/7074/8654/4099/646/7122/1826/57165/3572/23566/7732/57580/6604/6376/57091/7424/3567/57463/27185/4036/23499/7052/85358/6…
GO:0001614	MF	purinergic nucleotide receptor activity	21	0.670467	1.7191	0.000272774	0.0033872	0.00251618	2984	tags=62%, list=16%, signal=52%	22953/64805/9934/27334/286530/5023/2857/5027/53829/5028/9127/29909/5026
GO:0016502	MF	nucleotide receptor activity	21	0.670467	1.7191	0.000272774	0.0033872	0.00251618	2984	tags=62%, list=16%, signal=52%	22953/64805/9934/27334/286530/5023/2857/5027/53829/5028/9127/29909/5026
GO:0001968	MF	fibronectin binding	30	0.623589	1.65746	0.000275696	0.00341801	0.00253907	5396	tags=73%, list=29%, signal=52%	4653/6423/151887/2192/284297/3488/7057/3690/3676/4313/1490/3489/4018/1513/131578/3486/11006/10272/59339/3685/84695/3688
GO:0009713	BP	catechol-containing compound biosynthetic process	21	0.670047	1.71803	0.000277358	0.00342767	0.00254625	4337	tags=62%, list=23%, signal=48%	9464/26002/3067/9365/6622/3642/7042/1621/1610/2625/5053/2861/6531
GO:0042423	BP	catecholamine biosynthetic process	21	0.670047	1.71803	0.000277358	0.00342767	0.00254625	4337	tags=62%, list=23%, signal=48%	9464/26002/3067/9365/6622/3642/7042/1621/1610/2625/5053/2861/6531
GO:1904315	MF	transmitter-gated ion channel activity involved in regulation of postsynaptic membrane potential	46	0.561043	1.56013	0.000280253	0.00345793	0.00256873	5267	tags=67%, list=28%, signal=48%	2901/2890/1136/2899/2558/2894/2743/2567/2898/2566/8973/2900/2564/1141/1143/2570/2897/2561/2555/2895/2892/2560/116443/2741/2557/2554/1137/1142/2569/2742/1145
GO:0045761	BP	regulation of adenylate cyclase activity	57	0.547066	1.54279	0.000284809	0.00350858	0.00260635	2547	tags=44%, list=14%, signal=38%	7434/116/4883/155/2587/2740/5064/775/554/10486/1909/154/10886/729230/2550/1816/1812/2913/3973/1813/9568/49/1910/53829/7253
GO:0002864	BP	regulation of acute inflammatory response to antigenic stimulus	14	0.737203	1.77894	0.000288614	0.00354782	0.0026355	2308	tags=57%, list=12%, signal=50%	1268/718/26279/1236/695/4852/2213/4889
GO:0004713	MF	protein tyrosine kinase activity	135	0.462392	1.37666	0.000289366	0.00354782	0.0026355	5285	tags=44%, list=28%, signal=32%	4593/2045/4916/2042/2202/285220/640/4921/4920/3815/2322/4915/2066/660/238/5979/3702/695/5156/2043/2260/2044/7010/8828/4914/147746/3718/5157/558/5159/494551/2051/7273/1949/3645/7535/1436/10461/79834/7075/6098/2241/8829/2263/2534/2324/7294/2242/2268/2321/3791/2047/10114/3055/4145/4750/51232/3480/3932/27
GO:0048562	BP	embryonic organ morphogenesis	292	0.415758	1.27695	0.000289366	0.00354782	0.0026355	7211	tags=53%, list=39%, signal=33%	9464/2255/51676/8076/57453/2202/348093/4920/5079/8516/9423/6262/2735/2737/2487/7484/579/6935/2200/10736/220/64072/4208/9096/5396/2295/9241/2294/55084/3201/84189/6943/1909/5156/6608/7043/2138/4325/57216/3199/5311/140469/2254/6899/60529/7471/51761/3233/497189/9935/2303/57057/130497/5915/4838/53904/51384/51168/286204/2625/187/9132/25861/2697/64220/64321/65009/7048/26018/3200/525/4853/3214/80184/3202…
GO:0045178	CC	basal part of cell	266	0.420145	1.28637	0.000293923	0.00359801	0.00267278	6012	tags=46%, list=32%, signal=31%	10351/287/6543/1740/3680/5064/5010/196500/491/2066/146894/90102/353189/5745/338328/6563/1000/3953/7018/361/387700/53919/4547/7223/493/7010/912/952/115701/2191/5311/23705/115111/667/3672/57554/4671/3773/8825/5028/7253/123264/149461/10864/23187/57282/1131/83697/358/84465/9132/114571/4035/57477/375611/4478/5310/54106/55244/7439/55966/65009/947/5167/9381/8613/525/6507/728/10392/6521/846/9963/2054/655…
GO:0046579	BP	positive regulation of Ras protein signal transduction	61	0.541463	1.53411	0.00029848	0.00363658	0.00270144	3693	tags=49%, list=20%, signal=40%	3479/2255/2840/84636/27334/5294/2843/286530/137735/4914/6091/2151/4803/2846/1281/1902/10125/5159/5923/2149/9290/3707/2841/8477/79933/115727/9002/10161/4853/335
GO:1903556	BP	negative regulation of tumor necrosis factor superfamily cytokine production	62	0.534887	1.51771	0.00029848	0.00363658	0.00270144	6365	tags=66%, list=34%, signal=44%	3479/23547/9971/4057/9370/23208/671/197358/10457/6504/5443/558/2841/6376/1149/7099/11213/51738/26191/945/3586/10859/947/7128/11006/27202/84868/54209/64127/7291/140885/50856/54206/3565/3929/50943/2693/2621/64115/1139/4157
GO:0014031	BP	mesenchymal cell development	87	0.500102	1.4495	0.00029848	0.00363658	0.00270144	6534	tags=61%, list=35%, signal=40%	9464/223117/55698/9723/2066/8854/5979/10371/1000/1909/80031/6608/26508/56920/8828/2335/3357/596/8929/6899/57556/10500/3670/1910/2303/57057/2668/10512/54437/309/5308/30812/3911/8829/1908/340665/1906/9037/657/2348/23493/7291/83989/84541/54910/6591/10370/10501/6664/4254/3084/4902/90
GO:0021602	BP	cranial nerve morphogenesis	29	0.62395	1.65075	0.00030334	0.00369	0.00274112	5481	tags=69%, list=29%, signal=49%	91584/2737/3737/10371/8828/401/6899/1959/1141/497189/9935/104/3200/8829/3198/3211/2047/3212/3213/10370
GO:0035023	BP	regulation of Rho protein signal transduction	86	0.505723	1.46487	0.000312151	0.00378531	0.00281192	6469	tags=60%, list=35%, signal=40%	4653/2840/115557/84636/27334/148/2843/286530/9750/57493/25959/137735/6091/2151/2846/1281/1902/10395/5159/5923/2149/19/9290/2841/8477/9639/5924/79933/9002/9754/10161/54922/335/8829/90627/604/83892/23189/348/397/27/4650/3688/347273/201163/4983/25/143872/286205/11214/50650/157285
GO:0030168	BP	platelet activation	129	0.464527	1.38116	0.000312151	0.00378531	0.00281192	5810	tags=50%, list=31%, signal=35%	22915/1511/1311/6403/640/64805/170692/10077/2316/10398/9162/5592/5294/1607/5156/5023/3690/2335/959/2151/5270/2814/1281/558/5336/1608/5028/2149/3572/2811/340205/7099/2623/7450/10461/375033/7409/9002/51206/5588/1465/7094/239/7056/4352/7294/63036/18/958/5290/5341/10630/7414/150/151/3611/348/10019/3932/4846/160851/114897/10451/2147/139189
GO:0086014	BP	atrial cardiac muscle cell action potential	18	0.688081	1.72394	0.000314665	0.00379801	0.00282135	1761	tags=56%, list=9%, signal=50%	287/6262/3741/783/55800/2316/775/10052/3762/6331
GO:0086026	BP	atrial cardiac muscle cell to AV node cell signaling	18	0.688081	1.72394	0.000314665	0.00379801	0.00282135	1761	tags=56%, list=9%, signal=50%	287/6262/3741/783/55800/2316/775/10052/3762/6331
GO:0086066	BP	atrial cardiac muscle cell to AV node cell communication	18	0.688081	1.72394	0.000314665	0.00379801	0.00282135	1761	tags=56%, list=9%, signal=50%	287/6262/3741/783/55800/2316/775/10052/3762/6331
GO:0003179	BP	heart valve morphogenesis	55	0.542099	1.52665	0.000316707	0.00380804	0.00282881	5472	tags=64%, list=29%, signal=45%	9353/2006/6586/4208/11117/26508/8642/6091/10439/6092/6910/7042/57057/140628/2625/64220/7075/7048/2702/659/4853/4772/1482/7040/3491/4878/657/23493/56999/4194/7291/6093/4846/6591/23462
GO:0072028	BP	nephron morphogenesis	77	0.51735	1.49126	0.000316707	0.00380804	0.00282881	3780	tags=42%, list=20%, signal=33%	26585/2247/2737/7484/7482/10736/2066/2719/9241/6943/6608/2138/5087/8642/183/5311/596/26249/7471/5159/130497/2668/5727/170690/7475/80000/2625/186/5310/2246/30812/3911
GO:0032797	CC	SMN complex	10	-0.63809	-2.17698	0.000316969	0.00380804	0.00282881	6740	tags=100%, list=36%, signal=64%	11218/54960/8487/6607/6606/79833/11171/50628/79760
GO:0044305	CC	calyx of Held	18	0.687825	1.7233	0.000319259	0.00382963	0.00284484	2059	tags=50%, list=11%, signal=45%	3736/3776/5579/440279/3737/3738/5582/3746/9256
GO:0060675	BP	ureteric bud morphogenesis	63	0.535348	1.51918	0.000321264	0.00384181	0.00285389	3780	tags=43%, list=20%, signal=34%	26585/2247/2737/7484/7482/10736/2719/9241/6943/6608/2138/5087/8642/183/5311/596/7471/2668/5727/170690/7475/80000/2625/186/2246/30812/3911
GO:0030414	MF	peptidase inhibitor activity	179	0.439918	1.32729	0.000321264	0.00384181	0.00285389	6337	tags=47%, list=34%, signal=31%	221476/1285/89932/80760/721/6695/3699/718/27344/720/124857/8434/4057/2/7078/2719/5858/327657/51050/7980/710/135228/1470/6622/27151/5176/183/5270/4803/5627/1293/3730/50859/6691/7077/4671/5104/3698/939/9806/144568/4018/286204/1473/58189/12/199713/284293/8740/5272/11005/5918/197/164237/3700/25816/647174/5054/3053/1474/5345/347365/51232/5276/6093/7035/5273/10406/8530/5973/3827/56925/7079/5621/462/140…
GO:0001682	BP	tRNA 5'-leader removal	13	-0.568316	-2.1501	0.000325055	0.00387243	0.00287664	8039	tags=100%, list=43%, signal=57%	10556/11102/6741/10940/10775/10557/10799/51367/79897/54913/10248/138716
GO:0030677	CC	ribonuclease P complex	13	-0.568316	-2.1501	0.000325055	0.00387243	0.00287664	8039	tags=100%, list=43%, signal=57%	10556/11102/10940/54931/10775/10557/10799/51367/79897/3028/54913/10248
GO:0055006	BP	cardiac cell development	78	0.503421	1.45325	0.000325821	0.00387243	0.00287664	2664	tags=35%, list=14%, signal=30%	4629/221476/3479/88/51676/9472/11149/6444/80206/70/148/9096/6546/5999/5156/7049/57538/23363/115701/183/6910/8470/91807/3670/5159/7273/5997
GO:0002697	BP	regulation of immune effector process	344	0.407435	1.25537	0.000325821	0.00387243	0.00287664	8144	tags=60%, list=44%, signal=34%	1380/6363/933/2208/640/1378/115352/3815/10875/718/5169/26228/911/117854/913/284/2/3075/5322/2294/5788/388325/1524/695/3554/710/729230/7043/940/3071/912/22914/3662/114836/116449/959/8832/948/3718/23705/4068/56253/2213/6504/7042/57126/10666/9865/10125/5336/3575/339390/11126/387837/1178/5027/8013/10225/54440/1379/3684/114548/3593/114770/7099/1776/3567/84106/11213/2623/2625/8302/3592/2219/100528032/1…
GO:0098739	BP	import across plasma membrane	181	0.437488	1.32081	0.000334935	0.00397466	0.00295258	7224	tags=58%, list=39%, signal=36%	477/10060/482/6543/1261/6542/65267/774/285195/775/6547/777/84889/781/480/6546/7057/5999/3757/6559/6506/5023/123041/493/3762/948/6564/183/6557/486/3768/10021/3764/6567/3773/2350/779/6511/3763/5997/3769/6338/773/84230/4036/285335/2670/799/55244/7442/10268/2911/59272/6507/120103/55503/27112/2534/6560/261729/728215/25769/6518/113235/6529/389015/3758/6515/776/2348/6582/6540/4923/495/6340/610/6505/8660…
GO:0030672	CC	synaptic vesicle membrane	102	0.486519	1.42633	0.000339492	0.00401034	0.00297909	3835	tags=39%, list=21%, signal=31%	2890/115827/9899/120892/440279/284612/6860/57030/8224/9145/9162/273/148281/79953/22987/143425/24141/5802/246213/6857/8927/6622/9900/6854/22895/1813/55530/6571/6833/79772/127833/7781/2555/4985/132204/112476/9381/388662/525/23025
GO:0099501	CC	exocytic vesicle membrane	102	0.486519	1.42633	0.000339492	0.00401034	0.00297909	3835	tags=39%, list=21%, signal=31%	2890/115827/9899/120892/440279/284612/6860/57030/8224/9145/9162/273/148281/79953/22987/143425/24141/5802/246213/6857/8927/6622/9900/6854/22895/1813/55530/6571/6833/79772/127833/7781/2555/4985/132204/112476/9381/388662/525/23025
GO:0003205	BP	cardiac chamber development	165	0.446116	1.34343	0.000339492	0.00401034	0.00297909	5718	tags=48%, list=31%, signal=34%	9464/9353/287/6423/93649/3776/6586/23414/6262/1363/4208/4634/9241/2294/5138/9510/57167/1909/57493/7049/6608/26508/7010/8828/6091/6331/6092/6899/6910/11174/7042/3670/4889/2303/57057/10512/6604/199699/80000/2625/187/653/4036/8701/64220/7048/2702/7168/659/4853/8321/8829/2263/859/5950/4607/1482/7040/3491/55742/9782/657/27031/2535/4887/23493/7046/4194/2022/3480/129446/23129/639/4846/23462/10370/6474/1…
GO:0070371	BP	ERK1 and ERK2 cascade	315	0.41052	1.26247	0.000344049	0.0040499	0.00300847	5946	tags=45%, list=32%, signal=31%	9464/2045/3479/116/6363/2255/3356/55885/2192/27330/6366/2247/78986/168667/9590/6358/59/9370/388121/10979/284/2066/7078/148/5322/1236/5788/388325/2852/7018/5156/4852/2043/151306/6360/11117/7010/4914/2335/6356/1880/948/10457/183/3357/1813/80310/389658/5021/5314/6504/6368/57556/10125/3061/7786/4889/5159/5028/2149/152110/1490/7066/374403/9290/4838/2641/246/6376/7099/55532/6367/1436/1950/2651/50507/10…
GO:0042060	BP	wound healing	414	0.397026	1.22894	0.000344049	0.0040499	0.00300847	5418	tags=40%, list=29%, signal=29%	3479/2255/22915/1511/1311/6403/4638/2192/64094/2247/640/23671/64805/2162/2737/170692/10077/2316/10398/59/79625/10979/23208/9162/5592/80274/90102/5294/9241/7057/7980/1607/5156/710/135228/7043/5023/1816/3690/2191/2335/959/948/2151/5270/5627/2814/1281/146206/7042/667/558/5336/2157/8840/6833/25817/1608/5159/2303/5028/2149/3572/120425/90342/7476/54959/149461/2811/246/340205/953/7448/6376/7099/135/2623…
GO:0003953	MF	NAD+ nucleosidase activity	28	0.639587	1.68111	0.000344737	0.0040499	0.00300847	4577	tags=71%, list=25%, signal=54%	81793/51284/3554/55024/11141/952/9173/10333/7096/26280/51311/7099/353376/54106/7100/8809/8807/118788/683/23098
GO:0042415	BP	norepinephrine metabolic process	14	0.733729	1.77056	0.000344928	0.0040499	0.00300847	2851	tags=64%, list=15%, signal=54%	9464/26002/285671/9365/1909/5071/3642/1621/2625
GO:0010810	BP	regulation of cell-substrate adhesion	210	0.433139	1.31478	0.000348605	0.0040869	0.00303595	6135	tags=48%, list=33%, signal=33%	6422/25890/4653/340533/26585/347/151887/2192/1295/6366/2042/9723/11170/6695/2199/2316/375567/79625/10979/55679/90102/10391/1842/5212/1236/2294/7057/4852/11117/7010/2335/395/948/2824/596/5314/7471/7402/10395/10085/3175/9806/1307/30008/246/57580/6376/57091/8324/8322/27185/2651/23499/22998/1601/79834/4811/55966/5340/349633/335/6480/8829/604/3678/3491/916/5295/683/3204/7070/10630/136227/5054/3791/94/…
GO:0014912	BP	negative regulation of smooth muscle cell migration	24	0.648332	1.68532	0.000350355	0.00410122	0.00304659	4781	tags=67%, list=26%, signal=50%	9353/93649/3488/9370/5592/4208/80031/25817/4035/65009/7168/3486/657/5054/9294/199
GO:0051651	BP	maintenance of location in cell	212	0.432039	1.31199	0.000353162	0.00411545	0.00305717	6150	tags=44%, list=33%, signal=30%	477/845/287/5350/6363/3356/57158/2901/4842/844/6366/2247/9472/23345/1756/169026/6262/7220/6263/5587/775/930/57338/84502/1236/3708/2829/6546/5788/2852/6622/1193/1812/825/5311/3357/2814/1813/2946/6261/5336/1234/5027/2149/2811/6376/55704/55283/187/309/857/7781/9002/7442/3270/9001/2934/3709/4283/255231/5552/623/5144/920/7782/286527/11151/7070/213/54832/348/10345/11013/3596/5335/4923/7780/3932/375189/…
GO:0050769	BP	positive regulation of neurogenesis	216	0.427419	1.29874	0.000353162	0.00411545	0.00305717	5032	tags=41%, list=27%, signal=30%	9353/5649/5803/91584/4747/4135/443/3897/5063/26011/57611/9423/3815/2737/140578/4915/5789/8153/4131/4137/85458/4825/1638/6387/23316/2852/1524/2043/6608/5764/22891/10154/11141/23363/2335/5176/6091/5270/4803/1813/6092/146433/1959/816/7074/4099/1826/57165/3572/23566/7732/6604/6376/7424/57463/27185/4036/23499/7052/85358/7852/51199/2670/114798/5324/5583/9001/4988/659/30812/9253/5365/8829/7224/7040/6792…
GO:0001818	BP	negative regulation of cytokine production	268	0.419711	1.28514	0.000353162	0.00411545	0.00305717	7338	tags=54%, list=39%, signal=33%	3479/347/89795/284297/1378/225/1991/23547/9971/4057/9370/284/23208/3082/671/1236/7057/5788/1524/361/695/55024/6441/7043/5802/9734/3071/114899/9173/2335/197358/10333/8832/10457/3718/2615/51311/2213/6504/131450/7042/5443/558/10225/1240/201633/80380/114548/3593/2841/114770/6376/1149/7099/11213/51176/2625/4345/10461/3592/7292/51738/54106/282618/199713/26191/945/30009/3623/3586/10859/947/11326/335/141…
GO:1905517	BP	macrophage migration	53	0.54234	1.52317	0.000362276	0.00420902	0.00312667	5239	tags=57%, list=28%, signal=41%	64805/4920/151647/26228/7057/1524/6441/729230/11117/146433/6504/131450/84675/1910/1240/6376/1436/4345/719/255231/728/1588/2660/6347/6352/5919/54209/1435/566/56833
GO:0070372	BP	regulation of ERK1 and ERK2 cascade	291	0.414006	1.27165	0.000362276	0.00420902	0.00312667	5946	tags=46%, list=32%, signal=32%	9464/2045/3479/116/6363/2255/3356/55885/2192/27330/6366/2247/78986/168667/9590/6358/59/9370/388121/10979/284/2066/7078/148/5322/1236/5788/388325/2852/5156/4852/2043/151306/6360/11117/7010/4914/2335/6356/1880/948/10457/3357/1813/80310/389658/5314/6504/6368/57556/10125/3061/7786/4889/5159/5028/2149/152110/1490/7066/374403/9290/4838/2641/246/6376/7099/55532/6367/1436/2651/50507/100506013/152007/799/…
GO:0042269	BP	regulation of natural killer cell mediated cytotoxicity	46	0.556451	1.54736	0.00037139	0.00429561	0.003191	4560	tags=52%, list=25%, signal=39%	22914/114836/23705/4068/56253/10666/10125/11126/387837/3593/8302/3592/100528032/146850/7409/259197/3824/10859/3952/5272/6777/59067/84868/9437
GO:0050851	BP	antigen receptor-mediated signaling pathway	166	0.448957	1.35274	0.00037139	0.00429561	0.003191	6126	tags=52%, list=33%, signal=35%	931/933/640/5579/115352/148823/26228/930/660/4208/973/54900/1236/89857/3702/974/5788/9840/387357/695/55024/940/3071/50852/952/23180/199920/79037/596/4068/2213/5293/10666/56244/5336/11126/2533/100423062/5142/7535/925/84106/2625/3543/4332/23228/84433/5583/26191/53347/4773/257144/4340/84174/9473/123920/926/5144/2534/7294/11006/7805/79679/5290/150372/7070/3635/9404/10385/3937/5335/7462/919/3932/1493/…
GO:0043010	BP	camera-type eye development	326	0.407239	1.25319	0.00037139	0.00429561	0.003191	5743	tags=44%, list=31%, signal=31%	1545/2255/7275/11081/10218/6096/1295/91156/2247/2823/1641/2202/4081/7111/2737/4915/10586/7484/196740/1296/57030/7482/6935/55714/2200/491/146862/220/8854/775/1735/1410/7483/5979/2295/54549/5961/658/84189/2916/5156/4211/493/246213/23363/57545/5158/50939/57381/5797/5176/7068/221935/1813/56853/7042/25932/51761/4094/23418/1826/4693/5159/4286/2303/7476/7475/57110/10002/6604/131544/51384/286204/343035/8…
GO:0000974	CC	Prp19 complex	12	-0.591738	-2.23462	0.000373722	0.00431615	0.00320626	7603	tags=100%, list=41%, signal=59%	56949/988/25949/5356/56259/55696/57461/51503/10286/3312/27339
GO:0017046	MF	peptide hormone binding	52	0.559974	1.57048	0.000375947	0.00432255	0.00321101	6534	tags=77%, list=35%, signal=50%	7434/117/9340/886/2690/4883/2587/2740/5745/1393/3953/2825/887/6344/4881/552/1395/5021/3061/1910/10203/1240/4882/10148/799/4160/100996758/5295/10266/3624/553/2642/3480/1394/5746/2693/2692/2696/5618/90
GO:0030308	BP	negative regulation of cell growth	182	0.437045	1.31933	0.000375947	0.00432255	0.00321101	4116	tags=34%, list=22%, signal=26%	6422/2045/221476/9353/6423/26585/2273/223117/85004/7143/6586/9423/147906/9723/2487/23111/1410/10371/4133/2258/5999/6585/1630/80031/5802/4856/4881/56920/183/5270/596/7042/2786/57556/10500/4099/10512/54437/5997/9856/53335/58189/186/2697/9706/1601/56981/64061/64321/27296/659/5167/131566/623/8829/859/604/344901/2100/81501/7040
GO:0090130	BP	tissue migration	300	0.405641	1.24633	0.000375947	0.00432255	0.00321101	5871	tags=43%, list=32%, signal=30%	9353/1545/72/26585/2255/2252/4223/6869/64094/2247/168667/3815/196740/23500/59/5587/284/4163/10000/1634/10563/70/5294/4208/2822/9839/2294/10371/7057/575/25959/7857/25960/5764/2260/9734/4856/493/7010/8828/3690/57381/5797/2191/11167/51466/5176/6091/183/5168/5293/7042/5336/84913/2196/79812/2303/27286/7476/411/7424/2625/1950/186/23499/8823/23328/100506013/152007/8742/2113/161198/51378/2246/1003/85329/…
GO:0048251	BP	elastic fiber assembly	11	0.773133	1.79185	0.000382127	0.00438185	0.00325506	2535	tags=82%, list=14%, signal=71%	4629/7148/4239/10516/11117/79875/1281/4054/30008
GO:0007413	BP	axonal fasciculation	22	0.656711	1.69177	0.000382798	0.00438185	0.00325506	1365	tags=41%, list=7%, signal=38%	1268/55118/6900/2042/4685/152330/4692/10371/2043
GO:0106030	BP	neuron projection fasciculation	22	0.656711	1.69177	0.000382798	0.00438185	0.00325506	1365	tags=41%, list=7%, signal=38%	1268/55118/6900/2042/4685/152330/4692/10371/2043
GO:0086070	BP	SA node cell to atrial cardiac muscle cell communication	11	0.772993	1.79152	0.000386933	0.00441808	0.00328197	2145	tags=82%, list=12%, signal=72%	287/6262/3741/55800/9096/10052/8913/6331/10021
GO:0004549	MF	tRNA-specific ribonuclease activity	14	-0.568347	-2.17347	0.000387102	0.00441808	0.00328197	8039	tags=100%, list=43%, signal=57%	10556/11102/80746/60528/10940/10775/10557/10799/51367/79042/79897/54913/10248
GO:0005251	MF	delayed rectifier potassium channel activity	31	0.605104	1.61399	0.000394174	0.00447249	0.00332239	5646	tags=77%, list=30%, signal=54%	3745/3736/56479/3741/3737/3738/3755/23704/170850/3757/3739/3746/3787/3790/9312/3756/9132/3753/3748/3743/3747/26251/23630/3785
GO:1901016	BP	regulation of potassium ion transmembrane transporter activity	58	0.539319	1.52333	0.000394174	0.00447249	0.00332239	5602	tags=59%, list=30%, signal=41%	845/287/88/3736/2273/9472/482/3788/3755/23704/219527/3746/3787/486/6833/57463/857/126755/3753/7881/30819/859/4734/4878/776/81832/54800/3747/54209/388591/3688/23630/288/144245
GO:0045766	BP	positive regulation of angiogenesis	157	0.453056	1.36227	0.000394174	0.00447249	0.00332239	6354	tags=53%, list=34%, signal=35%	5740/126393/1545/6423/26585/64094/63923/2247/168667/5579/1215/2277/718/10800/5587/10000/3082/7057/1524/7010/6356/5293/3670/2303/4838/1536/7424/79805/187/358/146850/23328/100506013/7852/8742/51738/2113/3687/51378/719/3586/7075/2549/2246/1003/7048/57608/947/147372/6915/728/8829/3678/57343/2624/958/2321/9037/10266/5054/3791/94/820/5335/2022/7291/3696/388/4846/6019/3688/10411/8817/3716/25/1990/7082/7…
GO:1904018	BP	positive regulation of vasculature development	157	0.453056	1.36227	0.000394174	0.00447249	0.00332239	6354	tags=53%, list=34%, signal=35%	5740/126393/1545/6423/26585/64094/63923/2247/168667/5579/1215/2277/718/10800/5587/10000/3082/7057/1524/7010/6356/5293/3670/2303/4838/1536/7424/79805/187/358/146850/23328/100506013/7852/8742/51738/2113/3687/51378/719/3586/7075/2549/2246/1003/7048/57608/947/147372/6915/728/8829/3678/57343/2624/958/2321/9037/10266/5054/3791/94/820/5335/2022/7291/3696/388/4846/6019/3688/10411/8817/3716/25/1990/7082/7…
GO:0140115	BP	export across plasma membrane	62	0.529605	1.50272	0.000398731	0.00450444	0.00334613	6120	tags=61%, list=33%, signal=41%	477/3745/343450/482/6543/3741/3737/5348/5243/23704/480/6546/3757/492/123041/486/3752/19/2697/55244/3753/9429/30819/4878/5174/10786/8671/6582/146802/495/222962/23630/478/10257/6565/479/10057/196527
GO:0060562	BP	epithelial tube morphogenesis	323	0.404337	1.24392	0.000398731	0.00450444	0.00334613	6045	tags=43%, list=32%, signal=30%	6422/9464/2045/56963/9353/340419/6423/26585/2255/5241/51676/367/2247/151449/64478/64399/9423/9723/6262/2737/2099/7484/7482/10736/144165/2719/4208/5979/9241/2294/57167/6943/1909/2043/6608/2736/2138/57545/57216/5087/5567/6356/8642/183/5311/596/4776/26249/25928/5314/7471/5293/7042/10395/25932/79812/2303/57057/130497/2668/5727/170690/7475/4838/80000/51176/2625/187/1436/1950/653/4036/186/2697/7852/531…
GO:0048568	BP	embryonic organ development	447	0.39009	1.21067	0.000398731	0.00450444	0.00334613	7131	tags=49%, list=38%, signal=31%	9464/84870/7173/2255/91584/51676/8076/57453/2202/348093/4920/5079/8516/23414/9423/3815/6262/2735/2737/2487/7484/579/128344/6935/2200/10736/220/8854/2/64072/374900/4208/9096/5396/2295/9241/2294/8320/55084/3201/84189/6943/1909/5156/3481/6608/7043/2736/2138/4325/57545/6886/57216/3199/5087/5311/140469/2254/6899/60529/7471/7042/51761/3233/497189/9935/2303/57057/130497/2668/5727/7003/7732/5090/5915/483…
GO:0070374	BP	positive regulation of ERK1 and ERK2 cascade	207	0.436003	1.32245	0.000403288	0.0045493	0.00337945	6009	tags=51%, list=32%, signal=35%	9464/3479/116/6363/2255/3356/6366/2247/168667/9590/6358/59/388121/10979/284/2066/148/5322/1236/5788/388325/2852/5156/4852/151306/6360/7010/4914/6356/1880/948/10457/3357/1813/80310/389658/6504/6368/10125/3061/7786/4889/5159/5028/2149/1490/7066/9290/4838/2641/246/6376/7099/55532/6367/1436/2651/50507/100506013/152007/799/56034/26191/2246/65009/4988/10268/6357/4853/26281/728/8829/10392/2263/920/846/2…
GO:0070098	BP	chemokine-mediated signaling pathway	87	0.49601	1.43765	0.000416959	0.00468988	0.00348388	5192	tags=51%, list=28%, signal=37%	9353/6363/2532/6366/643/2840/6586/6358/10563/1233/1236/2829/6387/1524/6360/729230/6356/6091/6368/1237/1234/10803/11240/1240/7066/6376/6367/2826/1238/7852/10936/1235/6357/4283/4352/1230/6347/6846/1906/6352/54209/10019/10663/57007
GO:0060840	BP	artery development	97	0.487925	1.42509	0.000416959	0.00468988	0.00348388	5718	tags=57%, list=31%, signal=39%	9464/4804/93649/1311/338/4638/2737/144165/10000/5396/9241/2294/5138/1909/2138/6091/5311/6092/6899/1959/11174/1281/7042/5159/2303/30008/187/4036/4035/4854/64220/2702/659/3952/221395/4016/8829/4015/1906/657/3198/94/2348/23493/348/7046/56999/2022/23129/639/57178/23462/10370/11064/6909
GO:0072088	BP	nephron epithelium morphogenesis	74	0.510231	1.46627	0.000421515	0.00472743	0.00351177	3780	tags=41%, list=20%, signal=32%	26585/2247/2737/7484/7482/10736/2719/9241/6943/6608/2138/5087/8642/183/5311/596/26249/7471/130497/2668/5727/170690/7475/80000/2625/186/5310/2246/30812/3911
GO:0048864	BP	stem cell development	87	0.495772	1.43695	0.000421515	0.00472743	0.00351177	6534	tags=60%, list=35%, signal=39%	9464/223117/2247/55698/9723/2066/8854/5979/10371/1000/5788/1909/80031/6608/56920/8828/2335/3357/8929/6899/57556/10500/3670/1910/2303/2668/10512/54437/7476/309/5308/30812/3911/8829/1908/340665/1906/9037/657/2348/7291/83989/84541/54910/6591/10370/10501/6664/4254/3084/4902/90
GO:0048806	BP	genitalia development	46	0.553705	1.53972	0.000426072	0.00477164	0.00354462	3980	tags=48%, list=21%, signal=38%	2255/367/4920/2099/7484/317719/2295/654/5156/3973/558/8626/497189/80000/653/4036/10461/10388/64220/5310/1588/5950
GO:0034707	CC	chloride channel complex	51	0.546933	1.53235	0.000430629	0.00481572	0.00357736	4985	tags=61%, list=27%, signal=45%	2558/2743/2567/2566/8001/1188/1193/2564/94015/25932/57348/2570/2561/54102/2568/1187/53405/2555/7439/1080/2560/57101/28962/55879/2741/54831/2557/2562/2554/2569/2742
GO:0021885	BP	forebrain cell migration	61	0.53617	1.51911	0.000435186	0.00485968	0.00361002	3275	tags=43%, list=18%, signal=35%	9353/5649/6900/7143/120892/64805/2737/85458/10718/6387/2258/285025/1600/266727/6091/5455/1812/1813/26468/2018/558/8941/89927/27185/7852/3362
GO:0072078	BP	nephron tubule morphogenesis	72	0.521091	1.49399	0.000439743	0.00488247	0.00362694	3780	tags=42%, list=20%, signal=33%	26585/2247/2737/7484/7482/10736/2719/9241/6943/6608/2138/5087/8642/183/5311/596/26249/7471/130497/2668/5727/170690/7475/80000/2625/186/5310/2246/30812/3911
GO:0001657	BP	ureteric bud development	94	0.492981	1.43674	0.000439743	0.00488247	0.00362694	3848	tags=39%, list=21%, signal=31%	6422/9353/26585/2247/168667/2737/7484/7482/10736/2719/5979/9241/9244/6943/6608/2138/5087/8642/183/5311/596/6092/7471/2303/130497/2668/5727/170690/7475/5915/80000/2625/186/2246/30812/3911/2263
GO:0002460	BP	adaptive immune response based on somatic recombination of immune receptors built from immunoglobulin superfamily domains	289	0.412925	1.2683	0.000439743	0.00488247	0.00362694	7637	tags=57%, list=41%, signal=34%	730/1380/6363/2208/202309/1378/721/718/60468/720/911/913/4063/930/10563/716/4208/89857/6095/5788/715/695/3554/710/729230/940/3071/912/3662/114836/9173/3111/959/23180/3718/1439/326/1191/51311/2213/6504/10666/57379/3575/339390/1178/5027/10747/54440/1379/939/3004/100423062/6693/729/3112/114548/3593/7099/925/51176/2625/3543/3592/10148/3117/7292/3570/64581/64005/30009/941/3586/5588/91543/3824/10859/50…
GO:0051251	BP	positive regulation of lymphocyte activation	293	0.409618	1.25808	0.000439743	0.00488247	0.00362694	6292	tags=48%, list=34%, signal=32%	3479/7704/6363/2255/6869/6366/1378/115352/2737/4208/115650/1236/5788/9840/695/3481/729230/2736/940/3071/912/22914/952/7412/3111/1880/959/81704/3718/596/9760/6504/1141/558/10125/3575/11126/54440/3572/1949/939/100423062/80380/3112/114548/3707/3593/399/6708/7535/64926/7099/3567/51176/2625/3543/923/857/3592/10148/100528032/146850/7409/3117/7292/64581/84433/30835/54106/26191/30009/941/3586/5588/4773/7…
GO:0051339	BP	regulation of lyase activity	74	0.508961	1.46262	0.0004443	0.00491899	0.00365407	5527	tags=54%, list=30%, signal=38%	7434/116/4842/4883/155/2587/2740/5064/775/554/10486/5957/1909/154/10886/729230/2550/1816/1812/2913/3973/1813/9568/49/1910/53829/7253/343035/57413/9495/8549/776/796/2912/2979/1394/79849/4846/2492/59350
GO:0045860	BP	positive regulation of protein kinase activity	388	0.393121	1.21621	0.0004443	0.00491899	0.00365407	7970	tags=54%, list=43%, signal=31%	4916/3479/116/5649/26585/6363/8115/3356/10178/6366/2247/120892/9607/2690/1136/4921/6543/4920/3815/2322/1991/26228/4057/9370/10979/284/9770/5294/148/10718/1236/1795/7057/5788/658/2258/3481/2043/154/2260/1600/3071/493/6886/3690/6622/23533/10333/959/6091/183/5311/3357/1813/7436/80310/389658/1191/146433/7042/221472/10125/54757/8654/8941/7786/5159/5027/152110/1742/2641/345611/3593/57091/7099/7424/5570…
GO:0038084	BP	vascular endothelial growth factor signaling pathway	42	0.575844	1.58734	0.000448857	0.0049553	0.00368105	4672	tags=57%, list=25%, signal=43%	64094/2322/2277/5587/1634/5156/25960/9508/8828/6091/5293/57556/5159/3593/7424/3592/2549/57608/147372/8829/2324/5290/2321/3791
GO:0048639	BP	positive regulation of developmental growth	158	0.443572	1.33442	0.000448857	0.0049553	0.00368105	4971	tags=45%, list=27%, signal=33%	3479/22999/2247/9472/2690/3897/57611/23414/9423/6860/2735/8153/4131/4137/2066/1735/4208/84525/6387/3481/7049/6608/57731/9699/89/6857/2335/5071/825/2254/4803/596/1813/32/6910/84258/51761/1826/57057/127833/54440/23566/59284/27185/23499/23236/7852/2307/51738/7048/6665/659/3952/6777/8829/23025/2263/7224/6792/6531/10409/1906/9037/657/1002/57699/9962/1954/23493/22902/1946
GO:0014074	BP	response to purine-containing compound	133	0.461475	1.37326	0.000453414	0.0049985	0.00371314	6264	tags=49%, list=34%, signal=33%	845/1545/1036/5179/10060/9472/5139/22953/64805/1261/6262/3488/6263/9370/5294/1393/5138/6546/1811/5023/5311/2946/6261/10021/7222/5027/5187/5028/6532/9127/7480/779/135/2623/358/5026/4327/7442/3753/1080/3709/2354/7056/6531/6529/3625/3158/15/343/1373/6528/610/54464/54434/10411/5030/1277/5327/2889/5020/9693/5031/6872/10142/6781
GO:0046717	BP	acid secretion	45	0.558849	1.55096	0.00045797	0.00502731	0.00373454	6015	tags=69%, list=32%, signal=47%	1066/5733/887/2550/7223/9900/1813/115111/5021/5244/4987/1133/3274/5027/123264/320/6343/51738/7442/85413/846/6554/8647/18/6529/389015/4923/7200/200931/5020/29887
GO:0098685	CC	Schaffer collateral - CA1 synapse	72	0.520342	1.49184	0.00045797	0.00502731	0.00373454	5599	tags=54%, list=30%, signal=38%	2045/4747/22854/7143/57689/9590/9118/5789/50944/4744/3708/1630/2043/1009/2550/8927/6854/26045/7476/347733/84628/320/160622/107/51738/2911/5340/64101/5552/146395/2534/114/6853/57497/5217/84961/3688/6855/5327
GO:0072009	BP	nephron epithelium development	111	0.475568	1.40225	0.00045797	0.00502731	0.00373454	3780	tags=40%, list=20%, signal=32%	26585/2247/2737/7484/7482/10736/9370/2719/4208/9241/25937/6943/1909/9863/6608/26508/2138/28999/5087/8642/4868/5455/183/5311/596/26249/7471/1910/2303/130497/2668/5727/170690/5175/7475/80000/2625/186/5310/2246/947/4853/30812/3911
GO:0055119	BP	relaxation of cardiac muscle	17	0.687779	1.70417	0.00045938	0.00503566	0.00374074	4435	tags=71%, list=24%, signal=54%	477/5350/6546/1113/2946/8654/5142/5997/3270/2934/5144/5290
GO:1904869	BP	regulation of protein localization to Cajal body	11	-0.604884	-2.22011	0.000461489	0.00504453	0.00374733	7358	tags=91%, list=40%, signal=55%	6950/56257/908/10575/10576/10694/7203/22948/10574/1736
GO:1904871	BP	positive regulation of protein localization to Cajal body	11	-0.604884	-2.22011	0.000461489	0.00504453	0.00374733	7358	tags=91%, list=40%, signal=55%	6950/56257/908/10575/10576/10694/7203/22948/10574/1736
GO:0046658	CC	anchored component of plasma membrane	61	0.535255	1.51652	0.000462527	0.00504877	0.00375048	6339	tags=64%, list=34%, signal=42%	1272/6900/401190/22854/23627/10082/2619/2719/338328/266727/146760/5314/57126/11126/2350/1742/2811/84628/11181/2262/51299/27255/53942/914/130749/10392/84966/7070/285704/2348/1946/64127/221914/147719/5621/57127/2352/2813/390243
GO:0030278	BP	regulation of ossification	115	0.469634	1.39071	0.000471686	0.00512711	0.00380868	6147	tags=55%, list=33%, signal=37%	6422/4958/7704/26585/1311/2662/4256/6869/4921/10736/4057/9365/4208/654/6546/658/338773/154/5764/7043/89/5087/1901/2824/596/1959/7042/5027/130497/4054/7480/2623/4745/56975/2697/162466/22943/240/659/5167/5552/27152/197/7040/3491/1230/2201/657/796/4146/7291/1435/860/5734/359845/4038/91461/56172/55589/5020/6664/196527/64096
GO:0055123	BP	digestive system development	138	0.462144	1.37659	0.000471686	0.00512711	0.00380868	5755	tags=51%, list=31%, signal=35%	6422/6423/2255/93649/348093/79827/3815/56033/2735/2737/579/10736/8854/5979/2295/2294/6425/887/6943/5156/3481/4852/51339/6608/7043/2736/8642/2254/596/60529/5021/1281/7042/2695/8626/1910/3572/5915/4838/140628/159296/6343/83881/64220/5310/56034/64321/7048/3202/2263/79971/2304/1028/5697/27031/1954/3158/5919/51057/429/1373/57728/123872/639/5009/55036/6474/91461/6909/5125
GO:0032103	BP	positive regulation of response to external stimulus	423	0.39344	1.21883	0.000471686	0.00512711	0.00380868	7953	tags=56%, list=43%, signal=33%	7060/1268/9353/4916/185/6363/2255/64094/5733/6366/2247/120892/81793/64805/5063/90865/2167/2277/718/26228/2316/117854/5587/51284/10563/5294/1233/5322/85480/1236/654/5138/245937/7057/6387/388325/3603/1524/9750/695/4852/7857/5764/2260/729230/940/3071/11117/149628/912/22914/114836/9173/116449/57118/6622/1901/183/22861/23705/80310/4068/146433/56253/51311/6504/56670/10666/10125/5336/4064/8840/11126/182…
GO:0001637	MF	G protein-coupled chemoattractant receptor activity	26	0.631848	1.65187	0.000473578	0.0051333	0.00381327	5192	tags=73%, list=28%, signal=53%	643/2840/1233/1236/2829/1524/729230/1237/1234/10803/1240/2826/1238/7852/10936/1235/1230/10663/57007
GO:0004950	MF	chemokine receptor activity	26	0.631848	1.65187	0.000473578	0.0051333	0.00381327	5192	tags=73%, list=28%, signal=53%	643/2840/1233/1236/2829/1524/729230/1237/1234/10803/1240/2826/1238/7852/10936/1235/1230/10663/57007
GO:1903429	BP	regulation of cell maturation	19	0.68153	1.72107	0.000475486	0.00514679	0.00382329	3159	tags=58%, list=17%, signal=48%	120892/4880/5979/25893/596/646/1910/494551/4882/53335/64581
GO:0031279	BP	regulation of cyclase activity	76	0.50637	1.45894	0.000480845	0.00517592	0.00384493	5527	tags=55%, list=30%, signal=39%	7434/116/4842/4883/155/2587/2740/5064/775/554/10486/5957/1909/154/10886/729230/2550/1816/1812/2913/3973/1813/9568/49/1910/53829/7253/5997/343035/57413/9495/2917/8549/776/796/2912/2979/1394/79849/4846/2492/59350
GO:0007272	BP	ensheathment of neurons	138	0.460829	1.37267	0.000480845	0.00517592	0.00384493	3412	tags=32%, list=18%, signal=26%	4653/1272/5354/287/5803/6900/23114/443/26011/10100/58494/225/4915/5010/10810/8506/6547/3082/50846/6258/6326/83700/163175/5764/4118/23136/5453/9444/1191/1959/4099/7122/7038/3792/3400/57463/9639/6334/83742/7852/84668/3687/57716/5376
GO:0008366	BP	axon ensheathment	138	0.460829	1.37267	0.000480845	0.00517592	0.00384493	3412	tags=32%, list=18%, signal=26%	4653/1272/5354/287/5803/6900/23114/443/26011/10100/58494/225/4915/5010/10810/8506/6547/3082/50846/6258/6326/83700/163175/5764/4118/23136/5453/9444/1191/1959/4099/7122/7038/3792/3400/57463/9639/6334/83742/7852/84668/3687/57716/5376
GO:0050680	BP	negative regulation of epithelial cell proliferation	125	0.460163	1.36729	0.000480845	0.00517592	0.00384493	5442	tags=48%, list=29%, signal=34%	6422/4804/6423/1285/367/4163/2719/55679/51146/4208/7057/8200/9104/7857/23213/7049/135228/5797/197358/5176/6091/687/7042/84913/3670/79812/5727/7480/3593/2625/857/3592/51738/1601/1030/6657/240/27152/2263/864/64102/9788/7040/22846/6347/2321/1028/3249/94/7026/348/11061/7046/55801/6678/4781/858/6591/80173/26471
GO:0003148	BP	outflow tract septum morphogenesis	25	0.631858	1.64614	0.000482774	0.00518948	0.00385501	5060	tags=72%, list=27%, signal=52%	23414/8828/6091/6092/6899/7042/3670/57057/10512/4036/7048/659/8829/2263/1482/55742/657/2022
GO:0045664	BP	regulation of neuron differentiation	189	0.431144	1.30415	0.000490003	0.0052454	0.00389655	4912	tags=41%, list=26%, signal=30%	6422/22871/6423/4674/9745/6900/392255/120892/339479/151449/221336/152330/2737/5121/6935/375567/4131/1620/85458/4208/238/4825/5979/654/50937/6387/8200/1840/4211/2260/1600/6925/26508/2138/3199/5087/9638/4803/596/8929/64843/7074/6457/4099/3670/1910/6532/7732/3400/53335/57795/4854/22943/4009/6657/57540/9315/30812/26281/4909/604/6496/4760/1482/7224/463/23531/2290/221938/2624/1808/85446/151/23493/22882…
GO:0010001	BP	glial cell differentiation	213	0.425792	1.29316	0.000490003	0.0052454	0.00389655	3408	tags=30%, list=18%, signal=24%	4653/1272/5354/4916/5649/5803/2255/6900/2247/2596/443/4920/26011/10100/2737/4915/10810/23500/4137/8506/6547/4825/9241/1000/163175/56978/2043/6608/5764/22891/1600/4118/7223/6886/28999/54587/5453/1812/5270/8929/1191/146433/1959/2250/4099/23418/3572/7732/3400/7099/55553/135/9639/51176/10893/4919/4035/375387/7852/92737/2670/6657/57716
GO:0051047	BP	positive regulation of secretion	296	0.408941	1.2561	0.000490003	0.0052454	0.00389655	6865	tags=48%, list=37%, signal=31%	1268/3745/7432/3479/22871/116/6869/9607/169026/640/6865/2850/6860/2587/25924/783/9971/8912/5122/8736/322/4825/2822/4628/654/6387/143425/2852/341359/2550/7043/4881/552/114899/222546/6857/952/8913/6622/8618/4826/183/1813/5021/1141/4987/7042/57126/2695/8941/3670/57555/1910/5027/5028/6532/2668/7273/8911/22925/3684/2641/2922/7099/7424/6343/135/2623/358/8447/8564/55691/112755/114131/51738/1601/7442/368…
GO:0004298	MF	threonine-type endopeptidase activity	13	-0.561108	-2.12283	0.000490804	0.00524674	0.00389754	8173	tags=100%, list=44%, signal=56%	122706/5698/5689/5685/5690/5696/5695/5692/5694/5699/5693/5691
GO:0032330	BP	regulation of chondrocyte differentiation	50	0.546803	1.52997	0.000499162	0.00532142	0.00395302	2675	tags=40%, list=14%, signal=34%	7704/26585/392255/2202/2737/579/6660/10736/7483/654/7227/658/8200/5744/8840/4094/4054/1490/5915/55553
GO:1902904	BP	negative regulation of supramolecular fiber organization	159	0.445884	1.34126	0.000499162	0.00532142	0.00395302	5385	tags=42%, list=29%, signal=30%	4653/9353/25802/11075/119/89795/7111/23671/130271/84952/25999/80206/4131/1410/90102/10391/50944/79822/6840/4133/2258/10382/57731/11117/50810/1496/6622/5071/1901/395/1191/29767/5962/146206/56203/10395/126820/89927/6708/6710/256949/146057/85358/1003/2934/10677/7454/23075/859/5295/5290/286527/11151/163782/23189/348/11013/54209/91663/5217/324/9535/375189/57551/23332/54434
GO:0051968	BP	positive regulation of synaptic transmission, glutamatergic	28	0.628722	1.65255	0.000500161	0.00532476	0.0039555	3145	tags=61%, list=17%, signal=51%	22871/5649/9378/7143/27092/4920/57616/54413/729230/4914/1812/5021/57555/59284/135/8564/85358
GO:0050767	BP	regulation of neurogenesis	350	0.402694	1.24091	0.000508321	0.00540422	0.00401452	6014	tags=44%, list=32%, signal=30%	2045/9353/4916/5649/5803/91584/4747/223117/7143/4135/443/3897/5063/26011/57611/9423/3815/9723/6860/2737/140578/4915/5789/23500/8153/4131/283659/4137/1620/23111/85458/4825/9241/10371/1638/4133/6387/23316/2258/2852/6585/1524/1630/2043/80031/6608/5764/22891/1600/5802/10154/26508/56920/11141/23363/2335/6356/5176/6091/5270/4803/1813/6092/4776/146433/1959/816/7074/57556/10500/4168/4099/6833/1826/57165/…
GO:0010232	BP	vascular transport	87	0.493794	1.43122	0.000517479	0.00547907	0.00407013	5901	tags=56%, list=32%, signal=39%	477/10060/482/6543/6542/6517/57419/6508/5243/84889/9194/480/3953/387700/53919/6506/493/552/948/3764/6567/4036/4035/11309/9429/388662/6507/6581/10396/6529/6515/4037/348/553/28232/8671/6582/6540/6528/9498/6505/222962/1244/10257/9376/6565/6533/10991/10057
GO:0150104	BP	transport across blood-brain barrier	87	0.493794	1.43122	0.000517479	0.00547907	0.00407013	5901	tags=56%, list=32%, signal=39%	477/10060/482/6543/6542/6517/57419/6508/5243/84889/9194/480/3953/387700/53919/6506/493/552/948/3764/6567/4036/4035/11309/9429/388662/6507/6581/10396/6529/6515/4037/348/553/28232/8671/6582/6540/6528/9498/6505/222962/1244/10257/9376/6565/6533/10991/10057
GO:0051896	BP	regulation of protein kinase B signaling	160	0.444611	1.33822	0.000517479	0.00547907	0.00407013	5418	tags=44%, list=29%, signal=31%	4653/4916/6363/6366/2247/64805/143686/4915/3488/388121/10979/284/5294/5979/1236/7057/6425/2852/1524/85453/3481/9863/55024/2260/940/7010/4914/23533/1813/5314/5293/558/23551/93492/4922/7066/6376/57091/56917/2625/1950/2651/4036/3059/50507/2159/799/10268/3952/1411/859/2660/7040/3092/5290/9037/2155/1646/2912/7046/55801/253260/10385/10019/2022/3480/114882/79727/3688/114897
GO:0010996	BP	response to auditory stimulus	27	0.61938	1.62179	0.000519556	0.00549356	0.00408089	3716	tags=56%, list=20%, signal=45%	477/9378/6869/9379/84189/5764/3746/1813/51761/497189/9856/375611/85358/64220/6507
GO:0030551	MF	cyclic nucleotide binding	36	0.572386	1.55514	0.000526638	0.00554578	0.00411968	6868	tags=78%, list=37%, signal=49%	11149/1261/5577/64091/5592/5138/1258/10021/8654/64208/5142/10846/5146/1262/5144/11069/54714/5593/610/10411/50940/5148/9693/340061/348980/140894/5141/5573
GO:0034446	BP	substrate adhesion-dependent cell spreading	109	0.469716	1.38337	0.000526638	0.00554578	0.00411968	5206	tags=44%, list=28%, signal=32%	4653/2192/22854/26033/11149/23671/8516/55698/2316/10979/55679/84168/7010/3690/2335/3676/558/84628/59277/57580/57091/8324/8322/10461/3915/1601/79834/64098/335/6480/2241/3911/8829/3695/3913/5295/55742/10630/3912/3037/23189/3611/9404/1946/22798/91663/3685/1955
GO:0071692	BP	protein localization to extracellular region	343	0.401408	1.23671	0.000526638	0.00554578	0.00411968	5037	tags=35%, list=27%, signal=26%	1268/6422/3745/111/7432/3479/116/1311/115827/9607/169026/640/6865/6616/2850/6860/3741/25924/4052/27445/9971/2200/5122/8736/322/4825/2822/4053/4628/654/140689/379/143425/2852/869/1113/4547/7857/9515/7043/9699/4856/387597/114899/222546/2044/952/5071/4826/284119/1813/56670/7042/2695/3670/57555/6833/1910/5027/2149/7273/19/2641/6623/3593/199699/7099/9024/7424/135/8447/4345/55691/3592/375387/8609/11413…
GO:0002040	BP	sprouting angiogenesis	124	0.466478	1.38586	0.000535797	0.00562929	0.00418172	4673	tags=44%, list=25%, signal=33%	4804/9353/84870/185/26585/4223/63923/2247/168667/9723/2277/196740/8434/284/10000/2822/7057/26051/25960/9734/7010/57381/6091/57556/79812/2303/27286/3593/7424/51176/187/3592/100506013/51738/161198/240/3586/2246/57608/4215/147372/6915/8829/90627/1960/3678/2324/10014/55742/2624/9037/10266/3791/94
GO:0030681	CC	multimeric ribonuclease P complex	10	-0.623245	-2.12633	0.000536745	0.00562929	0.00418172	7016	tags=100%, list=38%, signal=62%	11102/10940/10775/10557/10799/51367/79897/54913/10248
GO:0033204	MF	ribonuclease P RNA binding	10	-0.623245	-2.12633	0.000536745	0.00562929	0.00418172	7016	tags=100%, list=38%, signal=62%	11102/10940/10775/10557/10799/51367/79897/54913/10248
GO:0033238	BP	regulation of cellular amine metabolic process	32	0.600201	1.60542	0.000544955	0.00568468	0.00422287	4640	tags=56%, list=25%, signal=42%	9971/85300/5153/4852/493/5071/1812/4129/1141/635/3684/130013/4837/3689/2861/6531/18/23409
GO:0048662	BP	negative regulation of smooth muscle cell proliferation	52	0.553201	1.55148	0.000544955	0.00568468	0.00422287	4781	tags=56%, list=26%, signal=42%	4969/7432/7434/1264/93649/347/4883/3488/9370/5592/4208/2852/7043/4881/25817/30008/3593/5739/3592/3586/65009/7168/659/59272/7128/3486/9294/348/199
GO:0071706	BP	tumor necrosis factor superfamily cytokine production	164	0.443954	1.33691	0.000544955	0.00568468	0.00422287	6814	tags=55%, list=37%, signal=35%	3479/6363/120892/90865/9590/23547/9971/4057/9370/284/23208/671/7057/5788/1524/114900/729230/26137/197358/8832/948/7096/10457/4776/1191/6504/5443/558/10125/5336/3670/6833/54440/6693/3593/2841/6376/1149/1536/7099/11213/64581/4023/51738/54106/26191/945/914/3586/10859/947/3952/23643/10392/23586/7128/11006/27202/5295/943/84868/942/11027/54209/64127/7291/566/140885/50856/10865/113277/54206/3565/7097/39…
GO:1903555	BP	regulation of tumor necrosis factor superfamily cytokine production	164	0.443954	1.33691	0.000544955	0.00568468	0.00422287	6814	tags=55%, list=37%, signal=35%	3479/6363/120892/90865/9590/23547/9971/4057/9370/284/23208/671/7057/5788/1524/114900/729230/26137/197358/8832/948/7096/10457/4776/1191/6504/5443/558/10125/5336/3670/6833/54440/6693/3593/2841/6376/1149/1536/7099/11213/64581/4023/51738/54106/26191/945/914/3586/10859/947/3952/23643/10392/23586/7128/11006/27202/5295/943/84868/942/11027/54209/64127/7291/566/140885/50856/10865/113277/54206/3565/7097/39…
GO:0044298	CC	cell body membrane	31	0.599374	1.59871	0.000554114	0.005757	0.00427659	5729	tags=74%, list=31%, signal=51%	3745/933/482/64805/2558/3737/491/1524/3751/6530/23769/3746/9312/57463/85397/3748/114/6531/7070/3747/9498/478/90249
GO:0014032	BP	neural crest cell development	82	0.496713	1.43648	0.000554114	0.005757	0.00427659	6534	tags=60%, list=35%, signal=39%	9464/223117/55698/9723/2066/8854/5979/10371/1000/1909/80031/6608/56920/8828/2335/3357/8929/6899/57556/10500/3670/1910/2303/2668/10512/54437/309/5308/30812/3911/8829/1908/340665/1906/9037/657/2348/7291/83989/84541/54910/6591/10370/10501/6664/4254/3084/4902/90
GO:0002449	BP	lymphocyte mediated immunity	285	0.411362	1.2627	0.000554114	0.005757	0.00427659	6664	tags=50%, list=36%, signal=32%	730/1380/2208/202309/1378/721/718/720/911/913/930/716/5788/715/695/3554/710/729230/940/3071/912/22914/114836/3111/116449/959/23180/1439/23705/326/4068/1191/56253/51311/2213/6504/10666/57379/10125/3575/339390/11126/387837/1178/5027/10225/10747/54440/1379/939/3004/100423062/729/3112/114548/3593/925/2625/3543/57823/8302/3592/100528032/146850/7409/3117/7292/259197/64005/30009/3586/91543/3824/10859/50…
GO:0035640	BP	exploration behavior	27	0.617935	1.61801	0.000556337	0.00577237	0.00428801	3003	tags=48%, list=16%, signal=40%	477/5179/347730/7143/120892/1620/10752/57338/2695/57555/1742/57282/186
GO:0007617	BP	mating behavior	38	0.569953	1.55444	0.000563273	0.00583653	0.00433567	2882	tags=42%, list=15%, signal=36%	1268/7432/6863/6869/63951/5023/552/1816/7068/1812/5270/5021/1910/5028/6532/4808
GO:0050870	BP	positive regulation of T cell activation	217	0.423014	1.28529	0.000572432	0.00592352	0.00440029	7009	tags=54%, list=38%, signal=34%	3479/7704/6363/6366/1378/2737/115650/1236/5788/9840/3481/729230/2736/940/3071/912/22914/7412/3111/959/81704/3718/6504/10125/3575/11126/54440/3572/1949/939/80380/3112/114548/3707/3593/399/6708/7535/64926/51176/2625/923/857/3592/10148/100528032/146850/7409/3117/7292/84433/30835/26191/941/5588/7048/10859/3952/8740/10673/29851/921/6777/2534/1960/3558/920/604/864/3118/3594/11006/916/6347/79679/59067/1…
GO:0008188	MF	neuropeptide receptor activity	43	0.559666	1.54762	0.00058159	0.00600373	0.00445988	5293	tags=60%, list=28%, signal=43%	114815/4886/6869/22986/6865/57537/2587/2925/10316/10886/4158/6753/4889/4829/64106/6752/4988/2834/100996758/56923/2861/4887/84109/10888/4923/10887
GO:0043034	CC	costamere	16	0.691518	1.70119	0.00058173	0.00600373	0.00445988	1122	tags=44%, list=6%, signal=41%	287/23336/5239/2318/1756/23676/6840
GO:0050840	MF	extracellular matrix binding	54	0.543944	1.53121	0.000590749	0.00607259	0.00451102	5918	tags=61%, list=32%, signal=42%	9353/64094/2006/284297/8404/2199/3679/1634/7057/3690/9806/59277/7448/25903/11096/161198/170689/4811/633/3674/64093/169611/131578/3491/55901/4059/43/6678/59339/3685/3688/57124/7045
GO:0090090	BP	negative regulation of canonical Wnt signaling pathway	133	0.458351	1.36396	0.000590749	0.00607259	0.00451102	4179	tags=38%, list=22%, signal=30%	6422/152573/6424/6423/26585/63923/4920/27303/147906/2735/2737/2487/80114/144165/4163/2719/9096/9241/1000/6425/25937/22881/27123/51339/388336/5071/25928/100113407/3487/3670/219287/27120/3489/8322/857/100507050/85407/22943/1601/6657/27122/7091/23240/64321/23072/8321/80199/1482/1540/92162/26524
GO:0042552	BP	myelination	136	0.455965	1.3582	0.000590749	0.00607259	0.00451102	3412	tags=32%, list=18%, signal=26%	4653/1272/5354/287/5803/6900/23114/443/26011/10100/58494/225/4915/10810/8506/6547/3082/50846/6258/6326/83700/163175/5764/4118/23136/5453/9444/1191/1959/4099/7122/7038/3792/3400/57463/9639/6334/83742/7852/84668/3687/57716/5376
GO:0032231	BP	regulation of actin filament bundle assembly	101	0.480141	1.40473	0.000599908	0.00615044	0.00456886	5456	tags=48%, list=29%, signal=34%	6422/171024/4653/6869/23671/84952/2316/10979/90102/10391/22843/50944/79822/7043/51466/5071/1901/395/5962/1902/10395/11346/1490/6376/8477/9639/55704/79933/22899/22998/85358/55616/7168/7454/335/23075/8829/9788/5295/5341/7046/5345/5217/6093/9647/5734/23332/10411
GO:0045471	BP	response to ethanol	118	0.467694	1.38492	0.000599908	0.00615044	0.00456886	5116	tags=45%, list=28%, signal=33%	1268/4916/1036/117/5179/6869/2903/3779/6517/9370/4880/1393/5999/2550/7412/6000/1813/4129/1141/1621/7122/939/5997/1536/2625/94241/4988/3952/6915/3709/6480/113/2263/2534/116443/3558/6554/2660/2741/8647/6531/2796/18/1581/9962/2904/3158/3747/1788/2742/3596/9076/3480
GO:0007264	BP	small GTPase mediated signal transduction	498	0.383946	1.19613	0.000609066	0.0062361	0.00463249	6482	tags=46%, list=35%, signal=31%	4653/4804/9353/185/3479/5649/2255/117/85004/2247/2840/51209/57569/84952/9423/10235/115557/80243/84636/255426/8153/5587/27334/5294/148/79822/1795/2843/286530/55619/9750/5662/116442/1794/57493/25959/9077/1600/6236/22808/440073/137735/57381/4914/55843/23179/395/6091/117289/10602/81704/54734/2151/139818/4803/9844/2846/5962/1281/1902/7042/10395/9402/221472/57514/7074/10125/9828/4168/50649/5159/5923/57…
GO:0010977	BP	negative regulation of neuron projection development	133	0.457291	1.3608	0.000618225	0.00630492	0.00468361	5721	tags=48%, list=31%, signal=34%	2045/56963/22871/11075/223117/7143/120892/1809/9423/9723/6695/7025/2316/23111/10371/4133/2258/6585/1630/2043/80031/22891/1600/5802/56920/952/146760/23258/1902/57556/10500/4168/1400/4099/10512/1949/54437/9856/53335/26052/112755/2670/9706/22943/1601/5376/7431/8829/8831/2672/9037/7070/23189/348/22902/51265/393/54910/5793/4038/80128/8408/22876/8934
GO:0016323	CC	basolateral plasma membrane	223	0.425605	1.29493	0.000618225	0.00630492	0.00468361	6012	tags=47%, list=32%, signal=32%	10351/287/6543/1740/5064/196500/491/2066/146894/353189/5745/338328/6563/1000/3953/361/387700/53919/4547/7223/493/7010/912/952/115701/5311/23705/115111/57554/4671/3773/8825/5028/7253/123264/149461/10864/57282/1131/83697/358/84465/114571/4035/375611/4478/5310/54106/55244/7439/55966/65009/5167/9381/8613/525/728/10392/6521/846/2054/6554/23209/4359/114/113235/255022/389015/89872/10630/134/9962/2348/15…
GO:1903532	BP	positive regulation of secretion by cell	272	0.412409	1.26401	0.000618225	0.00630492	0.00468361	6865	tags=48%, list=37%, signal=31%	1268/3745/7432/3479/22871/116/6869/9607/169026/640/6865/2850/6860/2587/25924/783/9971/8912/5122/8736/322/4825/2822/4628/654/6387/143425/2852/341359/2550/7043/552/114899/222546/6857/952/8913/6622/8618/4826/183/1813/5021/1141/7042/57126/2695/8941/3670/57555/5027/5028/6532/2668/7273/8911/3684/2641/2922/7099/7424/6343/135/2623/8447/8564/55691/112755/114131/51738/1601/3689/945/3623/2645/81285/1080/517…
GO:1902656	BP	calcium ion import into cytosol	30	0.611011	1.62403	0.000627384	0.0063732	0.00473434	6813	tags=93%, list=37%, signal=59%	931/6543/774/775/6547/777/781/6546/5023/123041/493/779/773/799/7442/10268/55503/27112/2534/728215/25769/776/162514/778/5621/51393/9187/56302
GO:0032228	BP	regulation of synaptic transmission, GABAergic	33	0.593445	1.59605	0.000627384	0.0063732	0.00473434	3368	tags=52%, list=18%, signal=42%	1268/22871/23349/6869/1269/266743/8224/148/5334/85445/1813/5021/57555/4889/135/23228/9001
GO:0006911	BP	phagocytosis, engulfment	56	0.531018	1.49558	0.000627384	0.0063732	0.00473434	5230	tags=59%, list=28%, signal=42%	114786/718/26228/7057/575/3071/948/9844/11031/2213/5336/19/100423062/343702/3684/246/399/9938/3543/4481/64581/286046/3689/2934/51411/2624/389610/26762/199/54209/51454/4240/9886
GO:0010862	BP	positive regulation of pathway-restricted SMAD protein phosphorylation	47	0.555237	1.54756	0.000636543	0.00643385	0.00477939	5624	tags=64%, list=30%, signal=45%	651/2662/392255/7044/151449/654/8200/7043/7042/4838/653/9573/11030/1601/3623/7048/659/83729/57045/2660/7040/3625/657/353500/94/3624/7046/2022/3626/10220
GO:2000249	BP	regulation of actin cytoskeleton reorganization	41	0.560724	1.54018	0.000636543	0.00643385	0.00477939	6050	tags=54%, list=33%, signal=36%	4916/9723/26228/5156/7010/146206/1436/3059/4853/8829/2242/3055/397/9535/27/51225/10411/90668/54828/25/7082/4908
GO:0098661	BP	inorganic anion transmembrane transport	89	0.483716	1.40625	0.000636543	0.00643385	0.00477939	6767	tags=63%, list=36%, signal=40%	11095/203859/2558/2743/2567/1811/6559/2566/8001/1193/6557/2564/115111/121601/26266/2570/2561/2568/2555/375611/219855/7439/1080/6507/2560/57101/6521/846/6560/1836/55879/2741/2557/2562/6561/6529/2554/2569/1185/2742/6528/9498/6505/9990/63982/5172/284129/56172/5621/196527/6569/2556/116369/2915/5724/55107
GO:0072578	BP	neurotransmitter-gated ion channel clustering	14	0.716414	1.72878	0.00063667	0.00643385	0.00477939	4778	tags=86%, list=26%, signal=64%	22871/5649/22865/2743/388336/57555/1742/375323/51201/85358/729956/348
GO:1905332	BP	positive regulation of morphogenesis of an epithelium	36	0.568859	1.54556	0.000645701	0.0064978	0.00482689	3705	tags=44%, list=20%, signal=36%	26585/367/2247/7482/9241/6608/183/5293/79812/2668/2625/1950/186/2697/3687/30812
GO:0099529	MF	neurotransmitter receptor activity involved in regulation of postsynaptic membrane potential	49	0.548372	1.53194	0.000645701	0.0064978	0.00482689	5267	tags=65%, list=28%, signal=47%	2901/2890/1136/2899/2558/2894/2743/2567/2898/2566/2550/8973/2900/2564/1141/1143/2570/2897/2561/2555/2895/2892/2560/116443/2741/2557/2554/1137/1142/2569/2742/1145
GO:0032414	BP	positive regulation of ion transmembrane transporter activity	105	0.477979	1.4043	0.000645701	0.0064978	0.00482689	6772	tags=57%, list=36%, signal=37%	287/5649/88/3736/57158/844/9472/1756/482/27092/6262/783/644139/65267/5243/781/219527/54413/1909/9104/154/729230/5311/3746/2946/486/6769/5336/6833/30845/57463/85358/126755/3306/9001/1080/342667/7225/30819/6347/1906/4878/5174/3747/10345/54209/4923/388591/288/144245/5031/23237/154043/10142/84766/65125/1815/5724/9992/3458
GO:0098703	BP	calcium ion import across plasma membrane	29	0.608938	1.61103	0.000646347	0.0064978	0.00482689	6813	tags=93%, list=37%, signal=59%	6543/774/775/6547/777/781/6546/5023/123041/493/779/773/799/7442/10268/55503/27112/2534/728215/25769/776/162514/778/5621/51393/9187/56302
GO:0090646	BP	mitochondrial tRNA processing	12	-0.568286	-2.14606	0.000653428	0.00654102	0.004859	8039	tags=100%, list=43%, signal=57%	25821/55006/51095/57570/51654/54802/60528/84881/54931/80324/3028
GO:0071526	BP	semaphorin-plexin signaling pathway	43	0.557187	1.54076	0.00065486	0.00654102	0.004859	2485	tags=40%, list=13%, signal=34%	9464/91584/223117/4684/9723/2316/10371/1909/80031/10154/56920/8828/57556/10500/2668/10512/54437
GO:0033017	CC	sarcoplasmic reticulum membrane	41	0.559999	1.53819	0.00065486	0.00654102	0.004859	3644	tags=41%, list=20%, signal=33%	845/5350/57158/844/9472/6262/6263/57338/84502/10324/417/816/6261/6345/1760/3270/3709
GO:0030510	BP	regulation of BMP signaling pathway	102	0.479457	1.40563	0.00065486	0.00654102	0.004859	6112	tags=53%, list=33%, signal=36%	91851/64388/6422/56963/6424/6423/26585/494470/168667/348093/23090/222223/2200/375567/23111/2719/9241/6425/8200/23213/8646/222663/11167/25928/7471/57057/199699/286204/4036/164656/9573/22943/1003/659/94031/4853/8321/57045/3491/148738/3791/94/3611/10272/6498/2022/51232/5654/6497/6653/25/4756/6664/7021
GO:0003341	BP	cilium movement	182	0.432551	1.30576	0.00065486	0.00654102	0.004859	7752	tags=63%, list=42%, signal=37%	338/6869/89876/200373/6865/55130/22873/51314/144535/1770/480/79864/361/9104/8382/159686/493/255061/27285/54768/221481/387712/11189/126820/83538/92749/152110/8911/54514/79645/56171/64446/200162/5414/257044/8701/285335/81492/84229/79846/1235/283629/64518/345895/257062/85413/164395/199223/144132/3633/79925/26256/202500/348807/85478/26140/9576/399949/8632/79582/1767/25981/401024/27031/154313/27019/55…
GO:1902305	BP	regulation of sodium ion transmembrane transport	63	0.523722	1.48619	0.000673178	0.00667245	0.00495664	5028	tags=46%, list=27%, signal=34%	477/6327/4842/2259/1756/482/6330/53826/5348/55800/65267/2258/493/6331/486/7402/53822/130497/6324/2040/23072/57520/859/4734/2257/81832/54800/6640/7871
GO:0032729	BP	positive regulation of interferon-gamma production	77	0.506377	1.45963	0.000673178	0.00667245	0.00495664	4564	tags=49%, list=25%, signal=37%	51284/3554/729230/22914/114836/56253/51311/6504/10666/10125/3670/11126/54440/5142/3593/7099/3592/10148/100528032/7292/64581/54106/282618/26191/51744/914/10859/8809/5144/3558/3594/7294/916/3595/4049/59067/84868/149233
GO:0003206	BP	cardiac chamber morphogenesis	124	0.464187	1.37905	0.000673178	0.00667245	0.00495664	5718	tags=49%, list=31%, signal=34%	9464/9353/6423/6586/23414/6262/1363/4208/4634/9241/2294/9510/1909/57493/7049/6608/26508/7010/8828/6091/6092/6899/6910/7042/3670/4889/2303/57057/10512/6604/2625/187/653/4036/8701/7048/7168/659/4853/8321/8829/2263/859/5950/4607/1482/7040/3491/55742/657/2535/4887/23493/7046/2022/4846/23462/10370/6474/6654/6909
GO:0048565	BP	digestive tract development	126	0.459108	1.36427	0.000673178	0.00667245	0.00495664	5755	tags=50%, list=31%, signal=35%	6422/6423/2255/93649/348093/79827/3815/2735/2737/579/10736/8854/5979/2295/2294/6425/887/6943/5156/4852/51339/6608/7043/2736/8642/2254/596/60529/5021/1281/7042/8626/1910/3572/5915/4838/140628/159296/6343/83881/64220/5310/56034/64321/7048/3202/2263/2304/5697/27031/1954/3158/5919/429/1373/123872/639/5009/55036/6474/91461/6909/5125
GO:0110148	BP	biomineralization	168	0.433125	1.30492	0.000673178	0.00667245	0.00495664	6175	tags=48%, list=33%, signal=33%	4958/3479/340419/26585/1311/4256/4921/4920/54829/57419/4057/2719/9365/10117/4208/5745/654/6546/658/338773/154/5764/7043/123041/89/1901/2824/6899/645811/5744/54757/7123/5027/130497/4054/7480/7475/54959/246/2623/4745/56975/2697/129804/162466/240/1278/5251/1080/659/3952/5167/5552/2263/197/7040/3491/2268/1230/2201/249/4015/657/23493/4146/7291/6093/359845/1834/4846/152816/23462/1277/91461/7071/56172/5…
GO:0033218	MF	amide binding	377	0.399579	1.235	0.000673178	0.00667245	0.00495664	6600	tags=44%, list=35%, signal=29%	4804/7434/22871/4886/117/9340/2890/590/2903/886/2690/4883/1215/6262/2587/2740/25999/84570/911/774/913/554/1410/2925/322/5745/10316/1393/206338/3953/2825/2891/887/6344/2043/154/10886/5023/4881/33/552/8435/1395/912/29953/10333/948/7096/11136/32/10841/1191/2946/5021/2213/9452/4987/7042/23742/2893/4099/3061/6753/1910/4889/10203/2350/1240/3339/3684/4882/7099/320/51555/54749/8322/773/290/10148/4035/498…
GO:0002026	BP	regulation of the force of heart contraction	26	0.624883	1.63366	0.000675878	0.00669068	0.00497017	1518	tags=35%, list=8%, signal=32%	477/5350/4842/6262/148/4634/6546/1113/493
GO:0007620	BP	copulation	22	0.647176	1.66721	0.000677237	0.00669559	0.00497382	2381	tags=50%, list=13%, signal=44%	1268/7432/6863/6869/5023/552/5270/5021/1910/5028/6532
GO:0086067	BP	AV node cell to bundle of His cell communication	11	0.756999	1.75446	0.000690743	0.00681052	0.0050592	1761	tags=64%, list=9%, signal=58%	6330/6262/783/775/10052/8913/6331
GO:0036336	BP	dendritic cell migration	33	0.589812	1.58628	0.000691495	0.00681052	0.0050592	6278	tags=64%, list=34%, signal=42%	6363/51676/6366/5294/1236/729230/1880/81704/6504/1234/3592/7852/240/1235/91662/1230/6352/56833/196527/6688/2621
GO:0016049	BP	cell growth	471	0.391805	1.21795	0.000691495	0.00681052	0.0050592	4971	tags=34%, list=27%, signal=26%	6422/2045/221476/9353/185/3479/6423/26585/22999/93649/9201/91584/9211/2273/223117/85004/63923/7143/9472/8643/6586/3897/57611/9423/147906/9723/6860/11170/6695/10235/10516/2487/3488/8153/4131/4137/23111/1410/4692/148/4825/347252/10718/8128/10371/4133/6387/2258/5999/6585/3371/54413/1909/1630/80031/5802/6456/9699/4856/4881/552/56920/6857/23136/8828/952/2335/5071/3676/23769/183/5270/4803/10439/596/660…
GO:0002455	BP	humoral immune response mediated by circulating immunoglobulin	48	0.548906	1.53007	0.000700654	0.00686588	0.00510032	6154	tags=60%, list=33%, signal=41%	730/1380/2208/1378/721/718/720/716/5788/715/710/1191/2213/10747/1379/100423062/729/3543/3426/4049/3263/54209/51279/64127/55061/714/713/727/712
GO:0002715	BP	regulation of natural killer cell mediated immunity	50	0.542698	1.51848	0.000700654	0.00686588	0.00510032	4560	tags=52%, list=25%, signal=39%	22914/114836/116449/23705/4068/56253/10666/10125/11126/387837/10225/3593/8302/3592/100528032/146850/7409/259197/3824/10859/3952/5272/6777/59067/84868/9437
GO:0061333	BP	renal tubule morphogenesis	76	0.501076	1.44368	0.000700654	0.00686588	0.00510032	3999	tags=42%, list=21%, signal=33%	26585/2247/2737/7484/7482/10736/2719/4208/9241/6943/6608/2138/5087/8642/183/5311/596/26249/7471/130497/2668/5727/170690/7475/80000/2625/186/5310/2246/30812/3911/9788
GO:0001910	BP	regulation of leukocyte mediated cytotoxicity	84	0.494237	1.43141	0.000700654	0.00686588	0.00510032	4564	tags=49%, list=25%, signal=37%	26228/911/913/5788/1524/3071/912/22914/114836/23705/4068/56253/2213/10666/10125/3575/11126/387837/5027/3684/3593/1776/8302/3592/100528032/146850/7409/259197/3824/10859/3952/3140/5272/6777/3594/909/383/59067/84868/9437/149233
GO:0032411	BP	positive regulation of transporter activity	116	0.470667	1.39357	0.000709813	0.0069381	0.00515397	6772	tags=56%, list=36%, signal=36%	287/5649/88/3736/57158/844/9472/1756/482/27092/6262/783/644139/65267/9370/5243/781/219527/54413/1909/9104/154/729230/5311/3746/2946/486/6769/5336/6833/30845/57463/154881/85358/126755/3306/9001/1080/342667/7225/30819/5444/6347/1906/4878/5174/3747/10345/54209/4923/388591/4297/288/144245/5031/23237/154043/9143/10142/84766/65125/1815/5724/9992/3458
GO:1902905	BP	positive regulation of supramolecular fiber organization	175	0.436625	1.3164	0.000709813	0.0069381	0.00515397	5173	tags=39%, list=28%, signal=29%	6422/171024/4653/25802/11075/7148/88/10178/6869/6366/89795/10810/54551/4131/10979/4137/22843/1236/1073/7043/3071/79998/55243/6356/51466/4868/10602/1191/1902/146206/11346/91807/1490/30008/246/6376/8477/9639/55704/79933/22899/8936/22998/51199/122060/2934/7168/7454/335/23075/2241/8829/859/9788/9873/2242/1906/9037/5341/23116/348/7046/253260/10152/5345/3055/5217/6249/9647
GO:0001527	CC	microfibril	12	0.737019	1.73573	0.000714455	0.00697469	0.00518116	4272	tags=83%, list=23%, signal=64%	4239/8076/4052/2200/81794/79875/30008/8425/4237/2201
GO:0090596	BP	sensory organ morphogenesis	265	0.416661	1.27537	0.000718971	0.00700997	0.00520736	6204	tags=48%, list=33%, signal=33%	2255/6096/1295/8076/91156/2247/2202/4920/8516/9423/2737/4915/2487/1296/579/7482/6935/55714/2200/10736/220/1735/64072/7483/9096/5396/2295/9241/54549/55084/84189/1909/4211/2138/23363/50939/3199/5797/7068/221935/140469/2254/596/6899/7471/51761/23418/497189/1826/9935/130497/5915/53904/10002/51384/51168/286204/2625/84465/118427/9132/25861/64220/5308/30813/1289/26018/5146/525/4853/30812/27152/80184/226…
GO:0009113	BP	purine nucleobase biosynthetic process	10	-0.613941	-2.09459	0.00072736	0.00706377	0.00524733	7189	tags=100%, list=39%, signal=61%	5631/2618/8833/6470/5471/3251/10606/353/6472
GO:0021545	BP	cranial nerve development	54	0.538881	1.51696	0.00072813	0.00706377	0.00524733	5483	tags=56%, list=29%, signal=39%	91584/2737/3737/10371/84189/123041/8828/4914/401/1258/8929/6899/1959/1141/3670/497189/9935/104/89797/3200/6507/8829/3198/3211/2047/3212/57007/3213/10370/51804
GO:0098632	MF	cell-cell adhesion mediator activity	54	0.538852	1.51688	0.00072813	0.00706377	0.00524733	4474	tags=41%, list=24%, signal=31%	1272/6900/23114/57453/22854/57689/152330/91624/83700/128434/23022/6092/1826/4345/27255/53942/342035/5365/284359/1266/64221/133418
GO:0060348	BP	bone development	223	0.424289	1.29092	0.00072813	0.00706377	0.00524733	6375	tags=49%, list=34%, signal=33%	4653/3479/6424/7704/6423/26585/158326/1311/54796/2690/4921/2121/3815/2737/2200/4057/4880/202151/4208/654/5788/658/3953/9104/338773/4211/23213/51715/7043/89/10234/4325/6886/8642/2313/1101/645811/7471/1281/6261/8840/60676/497189/4054/7066/5915/4882/309/56975/7052/2697/162466/51738/56034/633/7059/5308/5251/7048/10859/285590/659/3952/4853/8111/3214/2263/344901/55790/1112/249/4015/5305/1954/3791/3037/…
GO:1902476	BP	chloride transmembrane transport	65	0.522042	1.48459	0.000737289	0.00714369	0.0053067	5564	tags=63%, list=30%, signal=44%	203859/2558/2743/2567/1811/6559/2566/8001/1193/6557/2564/115111/121601/2570/2561/2568/2555/375611/7439/1080/6507/2560/57101/6521/846/6560/1836/55879/2741/2557/2562/6529/2554/2569/1185/2742/9498/6505/9990/63982/5172
GO:0007214	BP	gamma-aminobutyric acid signaling pathway	27	0.613282	1.60582	0.000740247	0.00716341	0.00532134	4867	tags=70%, list=26%, signal=52%	23349/2558/2567/5334/2566/2550/2564/9568/2570/2561/2555/23228/2560/165829/2557/2562/2554/729956/2569
GO:0001755	BP	neural crest cell migration	58	0.530229	1.49766	0.000746448	0.00721442	0.00535924	4685	tags=55%, list=25%, signal=41%	9464/223117/55698/9723/2066/5979/10371/1909/80031/6608/56920/8828/2335/3357/8929/6899/57556/10500/3670/1910/2668/10512/54437/309/5308/30812/3911/8829/1908/1906/9037/2348
GO:0005520	MF	insulin-like growth factor binding	29	0.605374	1.6016	0.000756362	0.00730115	0.00542366	5341	tags=66%, list=29%, signal=47%	8839/3488/347252/4856/3690/8840/3487/1490/3489/4036/3490/94031/203100/3486/3491/51232/3480/3685/5654
GO:0009308	BP	amine metabolic process	117	0.462556	1.37025	0.000764765	0.00737309	0.00547711	5782	tags=44%, list=31%, signal=31%	9464/2903/11185/8639/26002/285671/3067/9971/85300/9365/29958/5153/1909/4852/169355/4881/493/7412/6622/5071/9627/1812/3642/1813/4129/1141/7042/1621/635/3684/130013/1610/113451/2625/8564/4837/3689/5053/2861/6581/6531/18/23409/15/2034/6505/222962/7200/6999/438/23498/8942
GO:0007266	BP	Rho protein signal transduction	137	0.45441	1.35337	0.000773924	0.0074429	0.00552896	6566	tags=54%, list=35%, signal=35%	4653/4804/185/2840/9423/115557/84636/27334/148/2843/286530/9750/57493/25959/137735/57381/395/6091/10602/2151/2846/1281/1902/10395/5159/5923/2149/19/9290/2841/8477/9639/5924/79933/9002/9754/9411/1278/10161/7454/54922/335/8829/90627/604/440107/10630/83892/23189/150/348/388/6093/397/393/27/4650/3688/398/9620/347273/1012/201163/4983/25/79567/58480/143872/286205/11214/50650/157285/643338/2768
GO:0048839	BP	inner ear development	189	0.427766	1.29393	0.000773924	0.0074429	0.00552896	4783	tags=39%, list=26%, signal=29%	4916/2255/3776/168667/4920/8516/9423/2558/3777/2737/2487/9890/65217/341640/6935/220/64072/2070/9096/5396/55084/84189/2043/7043/246213/2138/8642/140469/2254/8929/6899/7471/7042/51761/4094/497189/9935/5159/8825/53904/2561/51168/55283/1687/2625/4919/9132/25861/2103/375611/6657/54360/26018/5816/525/26281/80184/2263/4760/2299/340784/2290/2624/8549/117531/3249/3198/222662/7545/2535/115908/23493/51057
GO:0070527	BP	platelet aggregation	69	0.509329	1.45637	0.000792241	0.00760023	0.00564583	4926	tags=46%, list=26%, signal=34%	22915/1511/1311/640/64805/170692/10077/2316/10398/5592/5294/5156/3690/2335/5270/3572/2811/2623/375033/51206/5588/1465/7094/239/4352/63036/18/5341/10630/7414/3611/10019
GO:0061041	BP	regulation of wound healing	123	0.45594	1.35383	0.000792241	0.00760023	0.00564583	6135	tags=52%, list=33%, signal=35%	22915/4638/64094/2247/170692/59/10979/5592/90102/7057/5156/710/135228/2191/948/5270/5627/8840/6833/25817/2303/2149/149461/2811/7448/3818/857/58189/64581/7852/240/55966/3848/5340/947/58529/8613/6915/2160/239/7056/7128/6484/18/1906/2155/5054/23189/150/348/10019/5345/9076/7035/4846/23332/3688/114897/3827/5327/2147/462/196527/5581
GO:0048266	BP	behavioral response to pain	16	0.685086	1.68536	0.000795803	0.00762497	0.00566421	1708	tags=44%, list=9%, signal=40%	7060/6869/22953/644139/7057/4914/6335
GO:0051281	BP	positive regulation of release of sequestered calcium ion into cytosol	39	0.574221	1.57357	0.0008014	0.00766913	0.00569702	5946	tags=69%, list=32%, signal=47%	57158/844/9472/7220/930/2852/6622/1812/825/5311/2946/2149/6376/187/9002/9001/4283/623/7070/10345/3596/5335/4923/6375/2147/25/5031
GO:0061756	BP	leukocyte adhesion to vascular endothelial cell	46	0.544763	1.51486	0.000810559	0.00774723	0.00575503	4121	tags=50%, list=22%, signal=39%	6403/119/6366/58494/1991/6387/1524/729230/7412/3676/6402/6401/8174/6693/2113/3689/240/10690/3952/10164/3695/10725/6484
GO:0048787	CC	presynaptic active zone membrane	28	0.614654	1.61557	0.000812182	0.00775319	0.00575946	3995	tags=57%, list=21%, signal=45%	22854/2823/1008/491/23208/8506/1000/5023/493/5028/84628/320/112755/8676/9381/2054
GO:0046068	BP	cGMP metabolic process	16	0.683568	1.68163	0.000814418	0.00776498	0.00576822	4713	tags=81%, list=25%, signal=61%	2982/4880/2983/6095/5138/4881/5152/2977/8654/4882/10846/4878/3000
GO:0048846	BP	axon extension involved in axon guidance	37	0.564944	1.53838	0.000828876	0.00787382	0.00584907	2485	tags=43%, list=13%, signal=38%	9353/91584/223117/6586/9723/10371/6387/6585/80031/56920/8828/57556/10500/1826/10512/54437
GO:1902284	BP	neuron projection extension involved in neuron projection guidance	37	0.564944	1.53838	0.000828876	0.00787382	0.00584907	2485	tags=43%, list=13%, signal=38%	9353/91584/223117/6586/9723/10371/6387/6585/80031/56920/8828/57556/10500/1826/10512/54437
GO:0001558	BP	regulation of cell growth	405	0.395328	1.22321	0.000828876	0.00787382	0.00584907	5257	tags=35%, list=28%, signal=26%	6422/2045/221476/9353/185/3479/6423/26585/22999/93649/91584/9211/2273/223117/85004/7143/9472/8643/6586/3897/57611/9423/147906/9723/6860/11170/6695/10235/10516/2487/3488/8153/4131/4137/23111/1410/4825/347252/10718/10371/4133/6387/2258/5999/6585/3371/1630/80031/5802/9699/4856/4881/552/56920/6857/23136/952/2335/5071/183/5270/4803/10439/596/221481/7042/84258/2786/57556/57144/10500/3487/4099/60676/182…
GO:0001963	BP	synaptic transmission, dopaminergic	27	0.610205	1.59777	0.000832202	0.00789574	0.00586536	2756	tags=48%, list=15%, signal=41%	1393/85445/1816/6622/6530/5071/1812/1813/1141/23551/6532/2668/135
GO:0060074	BP	synapse maturation	25	0.619399	1.61368	0.000841397	0.00797324	0.00592293	3086	tags=48%, list=17%, signal=40%	5649/9378/4747/5064/124925/50944/1524/4776/816/27185/22899/4774
GO:0060306	BP	regulation of membrane repolarization	33	0.585533	1.57477	0.000856353	0.00810506	0.00602085	5413	tags=67%, list=29%, signal=47%	845/287/9472/6330/3741/2316/781/23704/3757/6331/6324/857/2697/3753/81033/2702/859/4878/776/6640/388591/23630
GO:0098533	CC	ATPase dependent transmembrane transport complex	24	0.631077	1.64046	0.000860652	0.00813583	0.00604371	2258	tags=38%, list=12%, signal=33%	477/5350/10060/482/5348/480/486/3764/6833
GO:0048486	BP	parasympathetic nervous system development	19	0.671406	1.69551	0.000863252	0.0081421	0.00604836	5192	tags=74%, list=28%, signal=53%	91584/10371/8828/401/8929/6899/1959/2668/104/89797/8829/3211/3212/57007
GO:0048168	BP	regulation of neuronal synaptic plasticity	50	0.539666	1.51	0.000865511	0.0081421	0.00604836	4778	tags=54%, list=26%, signal=40%	6900/729993/6543/3815/6860/9145/57338/2898/388336/6622/183/1813/1959/816/815/79772/5923/1742/440829/57282/51201/85358/6285/8831/729956/81832/348
GO:0060993	BP	kidney morphogenesis	93	0.484978	1.41352	0.000865511	0.0081421	0.00604836	3780	tags=39%, list=20%, signal=31%	26585/2255/2247/120892/2737/7484/7482/10736/2066/2719/9241/25937/6943/6608/2138/5087/8642/183/5311/596/26249/7471/5159/130497/2668/5727/170690/7475/80000/2625/186/80144/5310/2246/30812/3911
GO:0008509	MF	anion transmembrane transporter activity	311	0.406973	1.25089	0.000865511	0.0081421	0.00604836	6441	tags=47%, list=35%, signal=31%	11095/28965/10060/203859/2558/6542/5348/57030/57419/2743/285195/2567/6508/84889/353189/9194/387700/1811/6559/53919/6506/2566/123041/246213/8001/1188/6530/6512/1193/948/11136/6557/2564/115111/94015/144195/56301/25932/121601/6578/6571/26266/57348/2570/6532/10864/6511/2561/54102/345274/160728/2568/57282/6519/6514/1187/83697/114571/84230/53405/2555/375611/2697/9058/55065/285335/11309/55244/219855/743…
GO:0043395	MF	heparan sulfate proteoglycan binding	18	0.665487	1.66733	0.000872484	0.00818856	0.00608288	5108	tags=78%, list=27%, signal=56%	1311/60495/26279/3075/5788/6585/5802/4035/129804/4023/26281/9037/348/566
GO:0031295	BP	T cell costimulation	45	0.550738	1.52845	0.00087467	0.00818856	0.00608288	4663	tags=58%, list=25%, signal=43%	6363/6366/115650/1236/940/22914/959/11126/1949/80380/857/100528032/7409/7292/84433/941/8740/10673/29851/921/2534/11006/916/5290/942/10288
GO:0048844	BP	artery morphogenesis	70	0.510054	1.46077	0.00087467	0.00818856	0.00608288	5481	tags=57%, list=29%, signal=40%	9464/93649/1311/338/4638/10000/5396/9241/2294/1909/2138/5311/6899/1281/7042/5159/2303/30008/4036/4035/4854/64220/2702/659/221395/8829/1906/657/3198/94/2348/23493/348/7046/56999/2022/639/57178/23462/10370
GO:0050728	BP	negative regulation of inflammatory response	143	0.445509	1.33003	0.00087467	0.00818856	0.00608288	5531	tags=46%, list=30%, signal=33%	5740/3479/1269/145581/1991/5169/9971/9370/23208/3082/2294/6095/5788/2852/4852/4856/114899/7010/197358/5176/313/2213/131450/3670/4889/10203/89790/114548/3593/6376/135/2625/4345/58189/116379/51738/240/3586/1003/3848/335/1588/91662/2534/4210/3558/2853/7128/2268/284467/3559/79626/134/348/54209/3596/3055/5335/64127/5734/8530/56833/9655/140885/55870/57817
GO:0022029	BP	telencephalon cell migration	58	0.525975	1.48564	0.000892988	0.00834997	0.00620278	3275	tags=41%, list=18%, signal=34%	9353/5649/6900/7143/120892/64805/2737/85458/10718/6387/2258/285025/1600/266727/6091/5455/1812/1813/26468/8941/89927/27185/7852/3362
GO:0031532	BP	actin cytoskeleton reorganization	110	0.468447	1.38043	0.000902146	0.00842546	0.00625886	6334	tags=49%, list=34%, signal=33%	80731/203447/4916/83872/2255/2252/51676/3815/9723/26228/2316/221981/10278/5156/84168/7010/1901/146206/221692/3645/149461/57091/85360/9024/8477/1436/3059/8572/2549/2934/64098/4853/2241/8829/2242/55742/5341/9294/253260/3055/397/9535/27/51225/8476/10411/4739/90668/54828/25/7082/4908/26053/116985
GO:0071676	BP	negative regulation of mononuclear cell migration	24	0.629694	1.63687	0.000906675	0.00845505	0.00628084	4245	tags=62%, list=23%, signal=48%	9353/26585/347/9750/4856/22914/131450/11240/4345/653/100528032/23236/257144/6347/1843
GO:0098945	CC	intrinsic component of presynaptic active zone membrane	16	0.680174	1.67328	0.000907493	0.00845505	0.00628084	2593	tags=56%, list=14%, signal=48%	22854/2823/1008/491/1000/5023/493/5028/84628
GO:0034331	BP	cell junction maintenance	40	0.569918	1.56589	0.000911305	0.00847023	0.00629211	6012	tags=65%, list=32%, signal=44%	577/27445/10979/8506/140689/869/55243/8927/57126/57555/2149/1742/1436/25861/26059/9788/10882/8831/9076/23085/5657/22941/3801/643866/4983/7082
GO:0031341	BP	regulation of cell killing	99	0.479692	1.40206	0.000911305	0.00847023	0.00629211	6772	tags=59%, list=36%, signal=37%	2208/26228/911/913/3075/5788/1524/3071/912/22914/114836/23705/4068/56253/2213/10666/10125/3575/11126/387837/5027/1379/3684/3593/1776/8302/3592/100528032/146850/7409/259197/64581/3824/10859/3952/3140/5272/6777/3594/909/383/59067/84868/9437/149233/9390/3596/910/3821/6375/3565/6688/3122/3823/3383/5551/5532/3458
GO:0048705	BP	skeletal system morphogenesis	225	0.418185	1.27311	0.000920464	0.00854512	0.00634775	6375	tags=47%, list=34%, signal=31%	6422/6424/6423/26585/158326/1311/4256/57453/2690/4920/5079/64399/2737/7484/579/6660/6935/10736/4057/4880/4208/5396/654/9241/3201/658/5156/338773/2260/51715/7043/89/2138/4325/3199/1101/6899/60529/1281/3233/4313/60676/497189/5027/2303/130497/4054/7480/1490/7476/5915/4838/55553/309/162466/5310/7059/7048/659/3200/3214/6939/79925/3202/2263/84159/80199/55790/1112/50515/2268/3204/2201/249/3198/1954/3037…
GO:0034511	MF	U3 snoRNA binding	11	-0.578582	-2.12357	0.000927535	0.00856865	0.00636523	7847	tags=100%, list=42%, signal=58%	9790/55720/27042/7520/57647/3669/10607/4809/55651/9136
GO:0019934	BP	cGMP-mediated signaling	34	0.582869	1.57583	0.000929623	0.00856865	0.00636523	4778	tags=65%, list=26%, signal=48%	10335/2982/5139/4880/5592/2983/5138/7057/4881/948/5152/3357/2977/1910/4882/10900/358/10846/4878/3000/3747/348
GO:0050901	BP	leukocyte tethering or rolling	33	0.583928	1.57046	0.000929623	0.00856865	0.00636523	5396	tags=67%, list=29%, signal=47%	6403/119/6366/58494/1991/6387/1524/729230/7412/3676/6402/6401/8174/6693/10690/3952/10164/3695/6484/9435/6093/3688
GO:0090101	BP	negative regulation of transmembrane receptor protein serine/threonine kinase signaling pathway	126	0.455374	1.35317	0.000929623	0.00856865	0.00636523	5444	tags=47%, list=29%, signal=33%	91851/64388/6422/8483/6423/26585/23089/168667/348093/4052/54829/124857/168002/2200/375567/23111/3547/9241/753/9863/7049/135228/7043/4856/11117/8646/54756/25928/7471/7041/3175/57057/65997/199699/1149/4036/857/4035/164656/9573/375387/22943/94031/8321/203100/57045/50515/2201/148738/10272/114990/6498/9480/51232/10252/9719/858/5654/399473
GO:0030427	CC	site of polarized growth	167	0.432094	1.30185	0.000929623	0.00856865	0.00636523	3502	tags=32%, list=19%, signal=26%	1268/4804/11075/5101/4747/347730/2823/120892/1809/2596/3897/6616/2316/4131/4137/85300/322/57451/81551/4133/2258/57616/24141/1630/1996/2916/2043/140767/23022/5802/3800/6622/9638/91752/3676/10439/10129/8633/4644/8941/1400/7786/1826/5923/5727/56104/27185/4649/25861/3059/51199/26059/9001/23767
GO:0050817	BP	coagulation	224	0.416387	1.26715	0.000929623	0.00856865	0.00636523	6036	tags=46%, list=32%, signal=32%	22915/1511/1311/6403/2192/640/64805/2162/170692/10077/2316/10398/9162/5592/80274/5294/7057/7980/1607/5156/710/5023/3690/2191/2335/959/948/2151/5270/5627/2814/1281/558/5336/2157/1608/5028/2149/3572/2811/340205/953/7448/7099/135/2623/222537/7450/3818/857/10461/375033/7409/9002/2159/51206/5588/3848/5340/947/7454/6915/2160/1465/7094/239/6521/7056/4352/7294/6484/2153/63036/18/958/5290/1906/2155/5341/1…
GO:0048207	BP	vesicle targeting, rough ER to cis-Golgi	15	-0.51587	-2.02786	0.00095405	0.00877296	0.006517	9015	tags=100%, list=48%, signal=52%	8452/56681/51128/1453/9919/59349/5537/553115/10972/10342/10959/10113/225689/10016
GO:0048208	BP	COPII vesicle coating	15	-0.51587	-2.02786	0.00095405	0.00877296	0.006517	9015	tags=100%, list=48%, signal=52%	8452/56681/51128/1453/9919/59349/5537/553115/10972/10342/10959/10113/225689/10016
GO:0046879	BP	hormone secretion	277	0.405208	1.24248	0.000966438	0.00887636	0.00659381	4813	tags=35%, list=26%, signal=26%	1268/6422/3745/111/7432/185/116/6869/886/9607/169026/640/6865/6616/2850/1363/3741/2587/25924/27445/9971/9370/4825/2822/654/1393/143425/2852/695/1113/2550/9699/4856/387597/114899/222546/2044/952/5071/4826/183/1813/5443/2695/6567/3670/57555/6833/5028/2641/2922/9024/6343/8322/2625/8447/8425/2697/8609/114131/51738/3667/1601/240/3623/2645/6447/5798/4160/1080/51762/3952/8111/55503/1588/1908/11069/846/5…
GO:0002043	BP	blood vessel endothelial cell proliferation involved in sprouting angiogenesis	24	0.628653	1.63416	0.00097129	0.00891038	0.00661908	4673	tags=62%, list=25%, signal=47%	4804/185/2247/168667/7057/26051/79812/3593/187/3592/100506013/57608/2624/9037/94
GO:0097104	BP	postsynaptic membrane assembly	11	0.748614	1.73502	0.000980561	0.00898481	0.00667437	3266	tags=73%, list=18%, signal=60%	22871/9378/9379/57502/1000/54413/57555/22829
GO:1903350	BP	response to dopamine	87	0.486322	1.40956	0.000984846	0.00900282	0.00668775	4327	tags=41%, list=23%, signal=32%	1129/111/2775/3356/120892/5731/5064/3363/2316/51617/2774/238/5999/1816/50632/5071/1812/3357/1813/1133/2781/3274/3359/3355/54331/9630/1131/85397/7052/3360/3362/285242/9177/59340/1132/10681
GO:0007605	BP	sensory perception of sound	151	0.441274	1.32204	0.000984846	0.00900282	0.00668775	6451	tags=50%, list=35%, signal=33%	1285/7275/22953/93035/3815/2558/7007/65217/491/64072/2070/283310/55084/9750/84189/57731/339768/246213/2138/125336/51473/7068/140469/6899/1141/84530/375323/53904/2561/51168/8322/1687/4919/9132/53405/4036/25861/375612/375611/117532/53942/89797/3753/50617/26018/9381/525/6507/2917/146183/152137/10750/117531/3249/1302/776/3198/222662/1428/8556/40/494513/259236/6591/5172/1277/5077/388551/340990/1280/73…
GO:0030688	CC	preribosome, small subunit precursor	15	-0.514741	-2.02342	0.00099051	0.00904394	0.0067183	9036	tags=93%, list=49%, signal=48%	117246/8780/55720/55781/161424/23076/84946/83732/8602/28987/79050/8568/85395/705
GO:1905330	BP	regulation of morphogenesis of an epithelium	64	0.512914	1.45624	0.00100325	0.00911739	0.00677286	3949	tags=42%, list=21%, signal=33%	6422/26585/2255/2252/367/2247/2099/7482/10736/3082/9241/23213/6608/183/5293/79812/2668/59277/2625/1950/186/85407/2697/3687/2246/30812/859
GO:0050772	BP	positive regulation of axonogenesis	77	0.501958	1.4469	0.00100325	0.00911739	0.00677286	5122	tags=51%, list=28%, signal=37%	9353/91584/4747/4135/3897/57611/9423/140578/4915/8153/4131/4137/85458/6387/10154/2335/6091/4803/6092/7074/1826/23566/57463/27185/23499/51199/114798/659/5365/8829/7224/6792/9037/1002/1954/22902/1946/6498/23129
GO:0060538	BP	skeletal muscle organ development	165	0.437374	1.3171	0.00100325	0.00911739	0.00677286	7456	tags=59%, list=40%, signal=36%	1674/1310/93649/150572/4223/51676/844/2006/1756/11149/22953/221662/5079/51778/64091/3131/3679/8506/4208/6258/6840/8320/9750/6943/3481/6608/1073/9734/89/26508/10324/4868/596/8929/6899/1959/56203/6261/54715/64208/7480/3792/857/64220/92737/58529/101929726/30812/9242/1271/2660/7040/10409/7026/2047/668/26576/59269/56261/7291/858/27063/8837/26471/58/10370/51804/84976/6474/9215/6497/7832/63950/6664/1052…
GO:0045926	BP	negative regulation of growth	236	0.418436	1.27619	0.00100325	0.00911739	0.00677286	4116	tags=32%, list=22%, signal=25%	6422/2045/221476/9353/6423/26585/2273/3776/223117/85004/7143/6586/9423/147906/9723/2487/3488/23111/1410/2719/9241/10371/4133/2258/5999/6585/1630/154/80031/5802/4856/4881/56920/183/5270/596/6910/7042/2786/57556/10500/4099/6532/5727/10512/54437/5997/247/9856/53335/58189/186/85407/2697/55841/9706/1601/56981/64061/64321/7048/27296/58529/659/5167/131566/623/8829/859/604/344901/5950/2100/81501/2660/7040
GO:0035235	BP	ionotropic glutamate receptor signaling pathway	22	0.638649	1.64525	0.0010093	0.00915094	0.00679778	3943	tags=59%, list=21%, signal=47%	5354/2901/2890/2899/2894/2898/2891/2900/2893/2897/2895/2892/116443
GO:1990806	BP	ligand-gated ion channel signaling pathway	22	0.638649	1.64525	0.0010093	0.00915094	0.00679778	3943	tags=59%, list=21%, signal=47%	5354/2901/2890/2899/2894/2898/2891/2900/2893/2897/2895/2892/116443
GO:0070525	BP	tRNA threonylcarbamoyladenosine metabolic process	16	-0.47969	-1.95505	0.00101125	0.00915787	0.00680293	9688	tags=100%, list=52%, signal=48%	64172/25821/55006/246100/57570/51654/54802/55644/112858/84881/54931/51002/80324/3028/8270
GO:0010644	BP	cell communication by electrical coupling	32	0.586545	1.56889	0.00104007	0.00938602	0.00697241	3861	tags=47%, list=21%, signal=37%	477/845/3736/482/6262/775/6546/10052/6910/57165/857/2697/3270/2702/5144
GO:0031093	CC	platelet alpha granule lumen	67	0.508772	1.44944	0.00104007	0.00938602	0.00697241	5018	tags=49%, list=27%, signal=36%	3479/88/22915/7044/2162/2277/2/3082/3671/7057/3481/710/7043/2335/5627/1191/7042/1/2157/7424/1950/7450/12/5340/1675/5552/197/7040/2153/5054/213/6678/5345
GO:0030098	BP	lymphocyte differentiation	368	0.391641	1.20956	0.00104007	0.00938602	0.00697241	5546	tags=41%, list=30%, signal=30%	1380/6422/931/7704/6363/1378/115352/3815/2322/2737/10875/6935/4063/930/26279/944/973/814/1236/3702/974/10320/6095/8320/5788/9840/3953/55619/387357/695/1794/22806/729230/9734/2736/940/3071/912/3662/114836/4914/7412/5087/3111/1880/959/3676/3718/139818/596/326/56253/9760/2213/6504/9452/7471/5293/558/57379/10125/5336/3575/917/5450/10803/9935/3175/54440/939/6693/114548/3707/3593/399/57580/2841/159296/…
GO:0002438	BP	acute inflammatory response to antigenic stimulus	24	0.626363	1.62821	0.00104529	0.00941126	0.00699116	3460	tags=58%, list=19%, signal=48%	1268/1991/718/2/26279/1236/695/4852/2213/133396/4889/2625/923/4988
GO:0003081	BP	regulation of systemic arterial blood pressure by renin-angiotensin	24	0.625952	1.62714	0.00104529	0.00941126	0.00699116	4374	tags=58%, list=24%, signal=45%	185/1511/6869/1215/1359/183/56670/1910/2149/186/81285/59272/6196/2028
GO:0002764	BP	immune response-regulating signaling pathway	397	0.392918	1.21522	0.00105848	0.00951894	0.00707115	6135	tags=45%, list=33%, signal=31%	1380/931/933/5602/640/81035/2206/81793/5579/1378/5063/115352/3815/148823/2099/23547/26228/9971/4057/51284/930/660/151888/4208/2822/973/54900/1236/89857/3702/974/5788/388325/9840/387357/695/55024/5802/940/3071/50852/22914/952/3662/10333/948/23180/7096/199920/79037/596/4068/51311/2213/131450/5293/10666/56244/9865/5336/11126/387837/8013/2533/1240/100423062/80231/5142/345611/7535/7099/925/84106/11213…
GO:0007191	BP	adenylate cyclase-activating dopamine receptor signaling pathway	10	0.761751	1.74457	0.00106158	0.00953581	0.00708368	2524	tags=60%, list=14%, signal=52%	111/5731/2774/1816/1812/54331
GO:0031055	BP	chromatin remodeling at centromere	11	-0.568632	-2.08705	0.00107594	0.00965093	0.0071692	8032	tags=100%, list=43%, signal=57%	3070/4678/3021/23421/201161/3020/11339/54069/55355/387103
GO:0050708	BP	regulation of protein secretion	241	0.417215	1.2727	0.00107689	0.00965093	0.0071692	6772	tags=45%, list=36%, signal=29%	1268/6422/3745/111/3479/9607/169026/640/6616/2850/6860/3741/25924/9971/5122/8736/322/4825/2822/4628/654/143425/2852/1113/9515/7043/4856/114899/222546/2044/952/5071/4826/1813/7042/2695/3670/57555/6833/5027/2149/7273/2641/3593/7099/9024/7424/135/8447/4345/55691/3592/8609/114131/51738/3667/240/945/2645/91543/81285/4988/1080/5066/3952/8111/846/5950/79971/4760/7040/114/63036/18/2864/3625/252983/353500…
GO:0045954	BP	positive regulation of natural killer cell mediated cytotoxicity	27	0.60395	1.58139	0.00108121	0.00967561	0.00718753	4362	tags=63%, list=23%, signal=48%	22914/114836/23705/4068/56253/10666/10125/11126/3593/8302/3592/100528032/7409/259197/3824/6777/59067
GO:0022010	BP	central nervous system myelination	22	0.636796	1.64047	0.00108338	0.00967561	0.00718753	2596	tags=45%, list=14%, signal=39%	1272/5354/6900/443/26011/8506/4118/1191/4099/3400
GO:0032291	BP	axon ensheathment in central nervous system	22	0.636796	1.64047	0.00108338	0.00967561	0.00718753	2596	tags=45%, list=14%, signal=39%	1272/5354/6900/443/26011/8506/4118/1191/4099/3400
GO:0006958	BP	complement activation, classical pathway	35	0.580508	1.5745	0.00109529	0.00972605	0.007225	6507	tags=69%, list=35%, signal=45%	730/1380/1378/721/718/720/716/715/710/1191/10747/1379/100423062/729/3543/3426/54209/51279/55061/714/713/727/712/1401
GO:0060688	BP	regulation of morphogenesis of a branching structure	51	0.533577	1.49493	0.00109529	0.00972605	0.007225	3949	tags=41%, list=21%, signal=33%	6422/26585/2255/2252/367/120892/2099/7482/10736/3082/9241/23213/6608/183/2668/59277/53335/186/30812/2263/859
GO:0031594	CC	neuromuscular junction	67	0.508188	1.44777	0.00109529	0.00972605	0.007225	7558	tags=73%, list=41%, signal=44%	1674/4593/2045/4747/3908/60482/81493/440279/1740/6695/1287/9145/6547/23024/2043/5913/9900/5270/7402/8292/7846/5027/2149/1742/112755/3911/23025/859/9873/3913/43/6640/1145/4038/3688/6855/288/9143/3084/58512/5573/4627/1013/1144/1140/1134/55333/10518/8851
GO:1903351	BP	cellular response to dopamine	86	0.489471	1.41779	0.00109529	0.00972605	0.007225	4327	tags=42%, list=23%, signal=32%	1129/111/2775/3356/120892/5731/5064/3363/2316/51617/2774/238/5999/1816/50632/5071/1812/3357/1813/1133/2781/3274/3359/3355/54331/9630/1131/85397/7052/3360/3362/285242/9177/59340/1132/10681
GO:0007596	BP	blood coagulation	220	0.416727	1.26764	0.00109529	0.00972605	0.007225	6278	tags=48%, list=34%, signal=32%	22915/1511/1311/6403/2192/640/64805/2162/170692/10077/2316/10398/9162/5592/80274/5294/7057/7980/1607/5156/710/5023/3690/2191/2335/959/948/2151/5270/5627/2814/1281/558/5336/2157/1608/5028/2149/3572/2811/340205/953/7448/7099/135/2623/7450/3818/857/10461/375033/7409/9002/2159/51206/5588/3848/5340/947/7454/6915/2160/1465/7094/239/6521/7056/4352/7294/6484/2153/63036/18/958/5290/1906/2155/5341/10630/50…
GO:0004526	MF	ribonuclease P activity	11	-0.568255	-2.08567	0.00109724	0.00973224	0.0072296	8039	tags=100%, list=43%, signal=57%	10556/11102/10940/10775/10557/10799/51367/79897/54913/10248
GO:0005890	CC	sodium:potassium-exchanging ATPase complex	12	0.726928	1.71197	0.00112758	0.00997309	0.00740852	1968	tags=42%, list=11%, signal=37%	477/482/5348/480/486
GO:0042417	BP	dopamine metabolic process	40	0.565905	1.55486	0.00113211	0.00997309	0.00740852	4381	tags=50%, list=24%, signal=38%	2903/26002/5153/4852/4881/6622/5071/9627/1812/1813/4129/1141/7042/1621/3684/1610/3689/2861/6531/18
GO:0033555	BP	multicellular organismal response to stress	73	0.502394	1.44197	0.00113211	0.00997309	0.00740852	2264	tags=33%, list=12%, signal=29%	7060/477/5649/117/5179/4842/6863/6869/22953/2558/644139/1620/4208/5979/2898/7057/4914/6530/6335/1812/5582/596/1621/1910
GO:0008081	MF	phosphoric diester hydrolase activity	88	0.479675	1.39249	0.00113211	0.00997309	0.00740852	5754	tags=53%, list=31%, signal=37%	345557/5139/5136/27115/5169/2822/5137/5153/5334/5138/1909/5158/133121/744/2151/5152/5168/1133/5336/8654/1234/5142/1131/8622/23236/23228/10846/5140/5167/5146/5330/84812/5144/220032/846/5145/1230/339221/6352/56261/5335/51196/5332/5337/50940/5148/9651
GO:0009914	BP	hormone transport	286	0.408064	1.25305	0.00113211	0.00997309	0.00740852	4816	tags=35%, list=26%, signal=27%	1268/6422/3745/111/7432/185/116/6869/886/9607/169026/640/6865/6616/2850/1363/3741/2587/25924/27445/9971/9370/4825/2822/654/1393/143425/2852/695/1113/53919/2550/9699/4856/387597/114899/222546/2044/952/5071/4826/183/1813/7276/5443/2695/6567/3670/57555/6833/5028/2641/2922/9024/6343/8322/2625/8447/114571/8425/2697/8609/114131/51738/3667/1601/240/3623/2645/6447/5798/4160/1080/51762/3952/8111/55503/158…
GO:0030133	CC	transport vesicle	394	0.392275	1.21338	0.00113211	0.00997309	0.00740852	4171	tags=29%, list=22%, signal=23%	9892/3479/4884/5179/2890/2903/115827/5126/11037/9899/120892/1809/169026/4135/6616/90865/440279/284612/6572/6860/1359/1363/25924/114088/84623/6517/57030/8224/9145/10590/83849/23208/9162/29106/8082/5122/273/83992/148281/3708/79953/22987/203190/143425/24141/9182/83716/1113/140767/341359/117248/2550/5802/246213/6857/80763/8927/6622/9900/9627/6854/4803/22895/1813/142684/84258/55530/1621/6571/6833/7977…
GO:0005614	CC	interstitial matrix	11	0.746157	1.72933	0.00113589	0.00999508	0.00742485	3288	tags=73%, list=18%, signal=60%	151887/7373/375567/1842/5212/3371/54507/89797
GO:0072080	BP	nephron tubule development	91	0.477221	1.38882	0.00115052	0.0101123	0.00751193	3999	tags=40%, list=21%, signal=31%	26585/2247/2737/7484/7482/10736/2719/4208/9241/25937/6943/6608/26508/2138/5087/8642/5455/183/5311/596/26249/7471/130497/2668/5727/170690/7475/80000/2625/186/5310/2246/4853/30812/3911/9788
GO:0042102	BP	positive regulation of T cell proliferation	100	0.471957	1.37975	0.00116892	0.0102625	0.00762348	4781	tags=46%, list=26%, signal=34%	3479/6363/115650/5788/3481/729230/940/3071/912/7412/959/3718/6504/54440/3572/80380/3593/6708/7535/64926/923/10148/7292/84433/30835/26191/941/5588/7048/3952/10673/6777/3558/3594/916/79679/59067/3559/84868/942/11151/149233/3109/10288/6352/199
GO:0002407	BP	dendritic cell chemotaxis	26	0.613699	1.60442	0.00117361	0.0102804	0.00763679	6278	tags=65%, list=34%, signal=43%	6363/6366/5294/1236/729230/1880/6504/1234/3592/7852/1235/1230/6352/56833/196527/6688/2621
GO:0014829	BP	vascular associated smooth muscle contraction	25	0.609505	1.5879	0.00117361	0.0102804	0.00763679	4722	tags=64%, list=25%, signal=48%	3356/1311/59/6546/1909/5023/952/183/1910/9732/6338/1131/80852/1908/1906/151
GO:0045050	BP	protein insertion into ER membrane by stop-transfer membrane-anchor sequence	10	-0.593234	-2.02394	0.00117961	0.0103096	0.00765851	7574	tags=100%, list=41%, signal=59%	9694/23065/51234/55831/284361/56851/10328/51016/83460
GO:0072546	CC	EMC complex	10	-0.593234	-2.02394	0.00117961	0.0103096	0.00765851	7574	tags=100%, list=41%, signal=59%	9694/23065/51234/55831/284361/56851/10328/51016/83460
GO:0043406	BP	positive regulation of MAP kinase activity	115	0.459605	1.36102	0.00118733	0.0103655	0.00769998	3432	tags=36%, list=18%, signal=29%	4916/6363/3356/10178/2247/120892/2690/4920/3815/2322/1991/5294/7057/5788/2043/2260/23533/10333/6091/3357/80310/146433/221472/10125/8654/7786/5159/5027/152110/7099/8322/1950/142679/146850/23328/50507/22943/54106/56034/8325/2246
GO:0055007	BP	cardiac muscle cell differentiation	107	0.465693	1.36983	0.00120574	0.0105025	0.00780181	4116	tags=37%, list=22%, signal=29%	4629/221476/3479/26585/88/93649/51676/9472/11149/6444/80206/70/4208/148/9096/6546/5999/5156/57538/23363/115701/183/6910/8470/91807/3670/5159/7273/5915/5997/55553/8324/50507/22943/84700/4703/4205/859/1482/7040
GO:0060249	BP	anatomical structure homeostasis	314	0.403596	1.24104	0.00120574	0.0105025	0.00780181	7301	tags=54%, list=39%, signal=33%	1268/1311/7275/3908/9607/1756/482/6543/58494/5166/196740/783/65217/65267/4130/491/4057/10590/284/317719/10000/64072/5745/83700/4753/25937/7018/338773/154/6608/6441/1073/729230/492/6456/5023/387597/952/3690/8029/6530/5071/1901/1258/825/596/645811/1281/3512/9256/9079/7122/23418/6833/167691/5027/4117/5028/2149/54440/4054/24/1490/5175/9290/6376/7099/286204/2623/1513/1436/2651/25861/2103/50507/2697/39…
GO:0019098	BP	reproductive behavior	44	0.556778	1.54114	0.00122415	0.0106271	0.00789434	2882	tags=41%, list=15%, signal=35%	1268/7432/6863/6869/1620/63951/5023/552/1816/7068/1812/5270/5021/1621/1910/5028/6532/4808
GO:0002701	BP	negative regulation of production of molecular mediator of immune response	37	0.556963	1.51665	0.00122415	0.0106271	0.00789434	4303	tags=54%, list=23%, signal=42%	933/1378/115352/284/7043/3718/2213/6504/7042/10225/11213/30009/3586/10859/335/11005/604/7040/11006/383
GO:2001259	BP	positive regulation of cation channel activity	70	0.503813	1.4429	0.00122415	0.0106271	0.00789434	5602	tags=56%, list=30%, signal=39%	287/5649/88/3736/57158/844/9472/27092/783/644139/781/219527/54413/1909/154/729230/5311/3746/2946/6769/5336/6833/30845/57463/85358/126755/9001/342667/30819/6347/1906/4878/3747/10345/54209/4923/388591/288/144245
GO:0016783	MF	sulfurtransferase activity	10	-0.592266	-2.02064	0.0012401	0.0107269	0.00796848	7592	tags=100%, list=41%, signal=59%	4338/11019/9054/55687/348180/55034/4357/100131187/7263
GO:0050966	BP	detection of mechanical stimulus involved in sensory perception of pain	14	0.699562	1.68811	0.00124171	0.0107269	0.00796848	3868	tags=64%, list=21%, signal=51%	3736/3356/23349/6387/4914/6323/7852/23621/2534
GO:0097110	MF	scaffold protein binding	67	0.506568	1.44316	0.00124256	0.0107269	0.00796848	3868	tags=40%, list=21%, signal=32%	111/22871/4842/3741/57502/8912/50944/54413/3757/493/8913/6331/2913/5336/5028/3572/1742/9332/2697/85358/22829/2895/9495/3709/7431/5144/2534
GO:0014902	BP	myotube differentiation	115	0.459232	1.35991	0.00124256	0.0107269	0.00796848	5838	tags=53%, list=31%, signal=37%	3479/93649/150572/577/4842/50804/22953/221662/58494/8912/405754/8506/4208/84814/575/9750/338773/6608/9734/4856/89/552/10324/4868/596/6899/7471/56203/6261/30816/30846/90342/7480/3792/51177/963/3756/1760/11096/92737/170689/4773/8740/101929726/4283/859/1482/10014/79365/9759/26509/858/493829/3688/8837/58/51804/6474/284358/6497/3565
GO:0051235	BP	maintenance of location	320	0.399053	1.22753	0.00124256	0.0107269	0.00796848	6150	tags=41%, list=33%, signal=28%	477/845/287/5350/6363/3356/57158/2901/338/4842/1066/844/6366/2247/9472/23345/1756/169026/152404/6262/7220/4052/22873/718/6263/2316/2200/5587/775/930/57338/84502/1236/3708/8605/2829/6546/5788/2852/3690/6622/1193/948/1812/825/5311/3357/2814/1813/32/2946/6261/5336/6571/1234/5027/2149/19/2811/199699/6376/1149/55704/55283/187/309/857/7781/375387/9002/4481/4023/5310/2583/7442/3270/9001/3586/440503/2934…
GO:0097091	BP	synaptic vesicle clustering	14	0.699182	1.68719	0.00126067	0.0108496	0.00805963	4295	tags=79%, list=23%, signal=60%	22871/8224/27445/1000/79953/6854/57555/9024/27253/84446/6853
GO:0031102	BP	neuron projection regeneration	54	0.529405	1.49028	0.00126096	0.0108496	0.00805963	5654	tags=56%, list=30%, signal=39%	56963/347/4747/7143/2596/2316/4131/3082/5396/2043/5764/5802/4974/596/146760/337/4313/4099/3670/9856/2670/9315/3913/4548/7070/2348/8578/3480/8408/22876
GO:0051017	BP	actin filament bundle assembly	153	0.438387	1.31553	0.00126096	0.0108496	0.00805963	5596	tags=41%, list=30%, signal=29%	6422/171024/4653/56776/119/6869/2006/10580/1809/23671/84952/11170/800/2316/10979/90102/10391/22843/50944/79822/7043/339768/51466/5071/1901/395/5962/1902/10395/11346/56907/221692/1490/6376/8477/9639/55704/79933/22899/22998/85358/55616/3936/83543/7168/7454/335/23075/8829/9788/5295/5341/199/7046/5345/5217/6093/9647/5734/23332/10411/4739/87
GO:0071006	CC	U2-type catalytic step 1 spliceosome	12	-0.543973	-2.05424	0.00126422	0.0108535	0.00806254	8491	tags=100%, list=46%, signal=54%	10594/23020/22794/54883/55696/9939/57461/27339/55110/55702/9775
GO:0071012	CC	catalytic step 1 spliceosome	12	-0.543973	-2.05424	0.00126422	0.0108535	0.00806254	8491	tags=100%, list=46%, signal=54%	10594/23020/22794/54883/55696/9939/57461/27339/55110/55702/9775
GO:0006271	BP	DNA strand elongation involved in DNA replication	15	-0.507693	-1.99572	0.00128243	0.0109977	0.00816967	9167	tags=93%, list=49%, signal=47%	5422/5426/10714/1763/54107/3978/4172/5984/5983/9837/4176/4173/5111/5425
GO:0045669	BP	positive regulation of osteoblast differentiation	66	0.509594	1.44979	0.00129778	0.0111048	0.00824922	5317	tags=53%, list=29%, signal=38%	3479/6423/2662/2247/4921/2737/4057/10979/5587/4880/3082/4208/654/658/25937/338773/222663/126820/8840/8626/3572/7480/4745/56975/3570/659/3491/2201/657/4037/115908/3611/9260/860/23051
GO:0048813	BP	dendrite morphogenesis	138	0.450074	1.34063	0.00129778	0.0111048	0.00824922	5665	tags=49%, list=30%, signal=34%	1501/22871/5649/9201/577/120892/158866/1136/4135/547/5063/8499/5789/80243/50944/10371/4133/23316/55619/1996/2043/5764/22891/11141/23363/1496/51473/11178/7436/4776/816/1141/1826/221692/7476/1742/25830/6383/26052/85442/85358/8609/23072/4205/57520/8829/2534/7224/4734/6792/26115/56965/80823/23098/23543/2047/65981/10152/57498/23542/51265/4038/3688/51225/3196/10160/9912
GO:1903115	BP	regulation of actin filament-based movement	39	0.564798	1.54774	0.00131619	0.0112129	0.00832949	4604	tags=46%, list=25%, signal=35%	477/287/5350/29119/6262/59/775/2258/6331/10021/5142/857/2702/5144/859/4607/10630/134
GO:0042698	BP	ovulation cycle	70	0.501973	1.43763	0.00131619	0.0112129	0.00832949	3823	tags=44%, list=21%, signal=35%	9353/1545/5241/2662/6586/2099/2/658/9510/5156/5764/7043/5176/3973/6092/5021/4987/7042/558/4313/4889/5806/8322/4808/4327/5798/4988/5066/3952/2560/6777
GO:0050864	BP	regulation of B cell activation	125	0.449687	1.33616	0.00131619	0.0112129	0.00832949	5661	tags=49%, list=30%, signal=34%	6422/933/640/1378/115352/23495/930/4208/115650/5788/695/55024/22806/940/3071/952/1880/596/2213/1141/54440/939/100423062/374403/64092/7099/3567/472/3543/4332/7292/84433/54106/30009/3623/3586/4773/10673/9473/6777/3558/604/7128/7040/7805/683/59067/958/150372/51237/3635/3624/200558/3596/64127/8660/56833/7158/4292/1493/10451
GO:0016064	BP	immunoglobulin mediated immune response	140	0.442155	1.31839	0.00131619	0.0112129	0.00832949	6570	tags=51%, list=35%, signal=33%	730/1380/2208/202309/1378/721/718/720/930/716/5788/715/695/710/940/3111/959/1439/1191/51311/2213/10666/57379/10747/1379/939/100423062/729/3112/3543/3117/7292/30009/3586/50615/3426/1235/3581/23075/3558/604/3118/7040/4049/3263/958/2214/3120/3109/100141515/3635/200558/54209/51279/64127/55061/7158/4292/6375/714/2209/3565/713/3115/50943/727/712/3122/3113/1401/3119
GO:0009190	BP	cyclic nucleotide biosynthetic process	22	0.631665	1.62725	0.00132412	0.0112558	0.00836137	4815	tags=73%, list=26%, signal=54%	111/108/2982/4880/2983/4881/2977/4882/107/196883/113/114/4878/3000/55811/115
GO:0052652	BP	cyclic purine nucleotide metabolic process	22	0.631665	1.62725	0.00132412	0.0112558	0.00836137	4815	tags=73%, list=26%, signal=54%	111/108/2982/4880/2983/4881/2977/4882/107/196883/113/114/4878/3000/55811/115
GO:0001956	BP	positive regulation of neurotransmitter secretion	17	0.66451	1.64652	0.00133351	0.0113076	0.00839989	3082	tags=59%, list=17%, signal=49%	1268/22871/6865/783/2852/6857/6622/135/8564/112755
GO:0061042	BP	vascular wound healing	17	0.664158	1.64565	0.00133351	0.0113076	0.00839989	4672	tags=71%, list=25%, signal=53%	64094/79625/25817/2303/4162/7852/240/947/7128/2624/5054/3791
GO:0086004	BP	regulation of cardiac muscle cell contraction	33	0.576158	1.54956	0.0013346	0.0113076	0.00839989	3949	tags=42%, list=21%, signal=33%	477/287/5350/29119/6262/775/2258/6331/10021/5142/857/2702/5144/859
GO:0071855	MF	neuropeptide receptor binding	34	0.574034	1.55195	0.001353	0.0114366	0.00849569	4983	tags=53%, list=27%, signal=39%	116/2775/6863/50944/887/4852/255061/5443/4922/100506013/114131/1908/181/56246/1906/5697/4878/5539
GO:0031252	CC	cell leading edge	415	0.386493	1.19624	0.001353	0.0114366	0.00849569	6198	tags=43%, list=33%, signal=30%	3745/11075/72/29119/4638/2890/729993/1809/130271/8516/2558/26084/11170/10235/3737/10810/59/491/10979/4137/4163/2567/70/273/660/90102/322/5783/4628/1000/388325/2852/4355/9750/24141/5662/6506/143903/9459/2566/23022/2550/84168/388336/23136/8910/3690/10324/5797/2191/51466/81704/5311/7456/5152/2564/3746/6092/8633/4644/5962/146206/10395/57126/221472/57514/667/54518/5336/8470/9079/50649/29993/152273/146…
GO:0061437	BP	renal system vasculature development	28	0.603029	1.58502	0.00135571	0.0114366	0.00849569	3831	tags=61%, list=21%, signal=48%	59/284/6943/1909/5156/7010/5311/80310/5159/2303/130497/5175/3570/4854/947/4853/8829
GO:0061440	BP	kidney vasculature development	28	0.603029	1.58502	0.00135571	0.0114366	0.00849569	3831	tags=61%, list=21%, signal=48%	59/284/6943/1909/5156/7010/5311/80310/5159/2303/130497/5175/3570/4854/947/4853/8829
GO:0009975	MF	cyclase activity	22	0.630978	1.62548	0.00136116	0.0114701	0.00852059	4815	tags=68%, list=26%, signal=51%	111/108/2982/2983/4881/2977/4882/107/196883/113/683/114/3000/55811/115
GO:0043083	CC	synaptic cleft	18	0.655865	1.64322	0.0013639	0.0114808	0.00852849	5149	tags=83%, list=28%, signal=60%	22871/4884/577/9211/3908/869/8292/1006/26052/3911/10882/3913/348/43/6505
GO:0061952	BP	midbody abscission	17	-0.477779	-2.09698	0.00136771	0.0115003	0.008543	9724	tags=100%, list=52%, signal=48%	91782/9525/51652/129531/10015/29082/128866/25978/79643/27183/51510/5119/27243/10112/55165/92421
GO:0021783	BP	preganglionic parasympathetic fiber development	17	0.663296	1.64351	0.00137081	0.0115065	0.00854762	5192	tags=71%, list=28%, signal=51%	91584/10371/8828/401/6899/1959/104/89797/8829/3211/3212/57007
GO:0014911	BP	positive regulation of smooth muscle cell migration	33	0.575949	1.549	0.00137141	0.0115065	0.00854762	4781	tags=58%, list=26%, signal=43%	3479/1545/3488/9510/80031/183/2254/596/80310/8840/5159/8013/7448/7099/9732/8829/3037/6352/199
GO:0150146	BP	cell junction disassembly	21	0.63434	1.62647	0.00137968	0.0115634	0.00858988	6154	tags=86%, list=33%, signal=57%	718/1524/2043/7043/6833/3684/6376/22943/9922/5295/7046/54209/6591/714/1845/10982/713/712
GO:0031214	BP	biomineral tissue development	166	0.434106	1.308	0.00138982	0.0116108	0.00862505	6175	tags=48%, list=33%, signal=32%	4958/3479/340419/26585/1311/4256/4921/4920/54829/57419/4057/2719/9365/10117/4208/5745/654/6546/658/338773/154/5764/7043/123041/89/1901/2824/6899/645811/5744/54757/7123/5027/130497/4054/7480/7475/54959/246/2623/4745/56975/2697/162466/240/1278/5251/1080/659/3952/5167/5552/2263/197/7040/3491/2268/1230/2201/249/4015/657/23493/4146/7291/6093/359845/1834/4846/152816/23462/1277/91461/7071/56172/55589/29…
GO:0008361	BP	regulation of cell size	179	0.425296	1.28317	0.00138982	0.0116108	0.00862505	6120	tags=46%, list=33%, signal=31%	2045/3778/91584/223117/7143/3897/57611/9423/9723/65267/8153/4131/4137/10000/23111/4825/5979/10371/4133/6387/2258/6585/361/6344/1630/6559/80031/5802/56920/2335/6557/4803/10439/5962/57556/3575/10500/4099/1826/5027/23566/10512/54437/3792/6343/2784/9856/358/27185/23499/375611/7409/4478/85358/9706/659/8829/859/6560/7224/6792/1808/1906/9037/5341/1002/1954/348/22902/1946/1185/51265/393/54910/9990/80128/…
GO:0009306	BP	protein secretion	334	0.396404	1.22043	0.00138982	0.0116108	0.00862505	6803	tags=43%, list=37%, signal=28%	1268/6422/3745/111/7432/3479/116/1311/115827/9607/169026/640/6865/6616/2850/6860/3741/25924/27445/9971/5122/8736/322/4825/2822/4053/4628/654/140689/379/143425/2852/869/1113/4547/7857/9515/7043/9699/4856/387597/114899/222546/2044/952/5071/4826/284119/1813/56670/7042/2695/3670/57555/6833/1910/5027/2149/7273/19/2641/6623/3593/7099/9024/7424/135/8447/4345/55691/3592/8609/114131/51738/3667/240/945/780…
GO:0048645	BP	animal organ formation	64	0.506509	1.43806	0.00140823	0.0117393	0.00872052	3848	tags=42%, list=21%, signal=34%	9464/2255/367/2247/2737/579/7482/4208/9241/23213/2138/6091/6092/6910/3670/8626/2668/140628/6604/4036/22943/64321/2246/7048/3200/4909/2263
GO:0050796	BP	regulation of insulin secretion	146	0.441025	1.31807	0.00140823	0.0117393	0.00872052	6772	tags=48%, list=36%, signal=31%	1268/6422/3745/111/9607/169026/640/6616/2850/3741/25924/9971/4825/2822/143425/2852/1113/4856/222546/2044/952/5071/4826/1813/2695/3670/57555/6833/2641/9024/8447/8609/114131/51738/3667/240/2645/1080/3952/8111/846/5950/4760/114/63036/18/2864/3625/252983/353500/23409/150/6352/100381270/1946/8660/7200/8938/2752/2693/7021/5581/5991/5019/2696/133308/3717/5532/55107/3458
GO:0033605	BP	positive regulation of catecholamine secretion	13	0.720899	1.7204	0.00141226	0.0117602	0.0087361	2392	tags=62%, list=13%, signal=54%	3745/7432/9607/6387/6857/5021/1141/2668
GO:1901030	BP	positive regulation of mitochondrial outer membrane permeabilization involved in apoptotic signaling pathway	11	-0.554593	-2.03552	0.00141682	0.0117856	0.00875492	8293	tags=100%, list=45%, signal=55%	2932/4836/666/9026/3002/2931/27113/7755/93974/400916
GO:0003158	BP	endothelium development	122	0.445704	1.32291	0.00142664	0.0118545	0.00880613	7469	tags=62%, list=40%, signal=38%	55273/26084/6935/80274/1903/654/5138/1909/57493/26051/11167/1901/169044/5962/25932/84913/7122/1910/2303/5175/1306/23236/81575/4478/7852/3687/64321/7075/2246/1003/947/2702/659/4855/8829/5144/90627/2701/10630/3791/94/7414/9294/7026/23493/80781/91663/9076/388/6093/81792/10411/23462/2889/9693/50943/7082/27086/6781/3383/2947/3084/90/54538/30061/118/7716/28514/4089/3627/340481/54345/5906/5624/9475/5908
GO:0048485	BP	sympathetic nervous system development	22	0.6293	1.62116	0.00143524	0.0119132	0.00884976	2851	tags=59%, list=15%, signal=50%	9464/91584/2676/10371/1909/8828/4914/401/3642/8929/8626/2668/2625
GO:0021537	BP	telencephalon development	244	0.41208	1.25754	0.00144504	0.011969	0.0088912	3304	tags=28%, list=18%, signal=24%	477/9353/5649/93986/3736/91584/6900/4747/7143/120892/482/64805/5079/79633/2737/84623/4915/220/2066/554/85458/238/166614/10718/10371/1000/6546/8320/6387/2258/285025/4852/6506/6608/1600/493/552/2044/266727/9638/6091/6331/5455/1812/1813/66000/146760/6092/5021/1281/26468/2018/8941/221692/89927/5915/3400/6867/6343/51176/358/1436/27185/23236/85358/7852/51199/3362/4009
GO:0002366	BP	leukocyte activation involved in immune response	272	0.406657	1.24638	0.00144504	0.011969	0.0088912	8327	tags=61%, list=45%, signal=34%	6363/640/202309/1378/3815/10875/5730/5169/911/4063/930/5294/2294/6095/8320/5788/55619/1524/695/1113/1794/729230/940/3071/3662/114836/116449/1880/959/8832/3718/3683/139818/284021/8995/2213/6504/9452/56670/5293/57126/57379/10125/54518/5336/4064/5450/8013/90342/5729/6693/3684/114548/3593/159296/114770/7099/1776/84106/6338/2623/51176/2625/27040/7292/3570/64581/3936/23228/282618/3689/51744/30009/941/3…
GO:0004114	MF	3',5'-cyclic-nucleotide phosphodiesterase activity	23	0.625157	1.62022	0.0014523	0.0120163	0.00892631	4077	tags=70%, list=22%, signal=54%	5139/5136/27115/5137/5153/5138/5158/5152/8654/5142/8622/10846/5140/5146/5144/5145
GO:0003170	BP	heart valve development	65	0.513238	1.45955	0.00148186	0.0122348	0.00908863	5600	tags=62%, list=30%, signal=43%	9353/2006/6586/4208/5138/11117/26508/8642/6091/10439/6092/6910/7042/57057/140628/2625/187/64220/7075/7048/2702/659/4853/4772/1482/7040/3491/9782/4878/657/23493/56999/4194/7291/6093/639/4846/6591/23462/6474
GO:0099175	BP	regulation of postsynapse organization	83	0.484901	1.40434	0.00148186	0.0122348	0.00908863	5067	tags=48%, list=27%, signal=35%	2045/4916/22871/5649/4884/120892/158866/547/5063/8499/5789/1000/23316/869/2043/11141/8828/91752/94030/816/2213/26045/7476/26052/58504/85358/51738/2895/5552/2534/51086/6792/26115/80823/2904/10288/348/65981/10152/57497
GO:0001848	MF	complement binding	19	0.66001	1.66673	0.0014938	0.0123082	0.00914317	3566	tags=53%, list=19%, signal=43%	1380/1378/721/720/10747/3684/5806/22918/3689/11326
GO:0072132	BP	mesenchyme morphogenesis	53	0.518714	1.45682	0.00150027	0.0123082	0.00914317	5718	tags=60%, list=31%, signal=42%	72/55273/59/70/9241/2294/26508/8642/6091/6092/7042/3670/2303/57057/130497/140628/51176/187/653/7048/657/94/23493/7046/4194/2022/7291/4846/6591/58/23462/6909
GO:0060291	BP	long-term synaptic potentiation	83	0.484327	1.40268	0.00150027	0.0123082	0.00914317	4778	tags=49%, list=26%, signal=37%	5649/2903/347730/7143/152404/6543/6616/11170/4915/10590/6547/4355/57616/1524/2043/5764/1395/6622/10858/1812/5270/5582/1813/4776/2695/26045/135/107/5924/51201/85358/2670/9495/25769/114/134/2904/10288/729956/80863/348
GO:0044106	BP	cellular amine metabolic process	112	0.45872	1.3543	0.00150027	0.0123082	0.00914317	6258	tags=46%, list=34%, signal=31%	9464/2903/26002/285671/3067/9971/85300/9365/29958/5153/1909/4852/169355/4881/493/6622/5071/9627/1812/3642/1813/4129/1141/7042/1621/635/3684/130013/1610/113451/2625/8564/4837/3689/5053/2861/6581/6531/18/23409/15/2034/6505/222962/7200/6999/438/23498/8942/3620/314/4204
GO:0007599	BP	hemostasis	226	0.417412	1.27123	0.00150027	0.0123082	0.00914317	6036	tags=47%, list=32%, signal=32%	22915/1511/1311/6403/2192/640/64805/2162/170692/10077/2316/10398/554/9162/5592/80274/5294/7057/7980/1607/5156/710/5023/3690/2191/2335/959/948/2313/2151/5270/5627/2814/1281/558/5336/2157/7166/1608/5028/2149/3572/2811/340205/953/7448/7099/135/2623/7450/3818/857/10461/375033/7409/9002/2159/51206/5588/3848/5340/947/7454/6915/2160/1465/7094/239/6521/7056/4352/7294/6484/2153/63036/18/958/5290/1906/2155…
GO:1903131	BP	mononuclear cell differentiation	416	0.387762	1.20016	0.00150027	0.0123082	0.00914317	5239	tags=39%, list=28%, signal=29%	1380/6422/931/7704/6363/640/1378/115352/3815/2322/2737/10875/6935/4063/930/26279/944/973/5153/814/1236/3702/974/10320/6095/8320/5788/9840/3953/55619/387357/695/1794/22806/729230/9734/2736/940/3071/912/3662/114836/4914/7412/5087/3111/1880/959/3676/3718/139818/596/326/146433/56253/9760/2213/6504/9452/7471/5293/133396/558/57379/10125/5336/3575/917/5450/10803/9935/3175/54440/939/6693/114548/3707/3593…
GO:0033270	CC	paranode region of axon	11	0.737874	1.71013	0.00150481	0.0123324	0.00916115	2363	tags=73%, list=13%, signal=64%	3736/8506/6326/57731/23136/4099/7122/57165
GO:0004970	MF	ionotropic glutamate receptor activity	19	0.659488	1.66541	0.00151235	0.0123812	0.00919738	4628	tags=74%, list=25%, signal=55%	2901/2890/2903/2899/2894/2898/2891/2900/2893/2897/2895/2892/116443/2904
GO:0098878	CC	neurotransmitter receptor complex	45	0.535647	1.48657	0.00151868	0.0123937	0.00920669	5950	tags=64%, list=32%, signal=44%	2901/2890/729993/2903/27092/2899/375567/2898/2891/388336/2900/126129/2893/3359/59284/1742/440829/118427/2895/2892/285242/9177/116443/2904/729956/93145/59283/170572/116444
GO:0030500	BP	regulation of bone mineralization	79	0.487406	1.40803	0.00151868	0.0123937	0.00920669	4272	tags=46%, list=23%, signal=35%	4958/26585/1311/4256/4921/4057/9365/4208/654/6546/658/338773/154/5764/7043/89/1901/2824/5027/130497/4054/7480/2623/4745/56975/2697/162466/240/659/5167/5552/197/7040/3491/1230/2201
GO:0044706	BP	multi-multicellular organism process	209	0.421732	1.27954	0.00151868	0.0123937	0.00920669	6264	tags=45%, list=34%, signal=30%	1268/116/5241/2192/6863/150921/6869/367/5737/64478/2099/3488/8434/56977/5858/5368/7216/1393/8605/23641/361/5764/7043/10699/5023/552/952/183/5270/596/5021/5744/6866/2695/49/4313/6833/4693/6532/27120/1307/4838/5997/85360/53405/3490/2697/100506013/51738/8909/7048/5066/659/3952/64518/59272/2354/6777/113/2834/7056/3678/181/340784/383/1906/84868/4878/796/7026/150/151/4012/6013/7142/1394/397/100137049/6…
GO:0086064	BP	cell communication by electrical coupling involved in cardiac conduction	25	0.6026	1.56991	0.00152477	0.0124304	0.00923392	3861	tags=48%, list=21%, signal=38%	477/482/6262/775/6546/10052/6910/857/2697/3270/2702/5144
GO:0007389	BP	pattern specification process	458	0.383596	1.19101	0.00153708	0.0125176	0.00929873	7098	tags=49%, list=38%, signal=31%	64388/6422/9464/5649/7704/6423/26585/2255/4223/51676/367/7092/57453/2247/4920/64399/55130/56033/2735/2737/718/79659/579/23500/128344/7482/80114/6935/126668/10736/2066/8854/2719/4208/4222/9096/10718/9241/2294/10371/8320/3201/658/4211/6608/2736/26508/2138/8646/57545/57216/8828/3199/5087/5567/8642/6091/5311/6092/6899/25928/60529/1959/6910/118856/168507/7471/2018/3233/3670/8626/497189/9935/2303/57057…
GO:0043268	BP	positive regulation of potassium ion transport	49	0.535408	1.49572	0.00155549	0.0126543	0.00940023	5602	tags=59%, list=30%, signal=41%	287/88/3736/2273/9472/482/3779/2316/65267/219527/3757/6000/1812/3746/486/6833/57463/126755/3753/30819/1908/4878/134/150/3747/54209/388591/23630/144245
GO:1902101	BP	positive regulation of metaphase/anaphase transition of cell cycle	16	-0.466347	-1.90067	0.0015703	0.0127506	0.00947176	9936	tags=100%, list=53%, signal=47%	29945/8452/5925/8697/8881/51433/51434/286053/118471/225689/9700/51529/9587/9787/81620
GO:0017147	MF	Wnt-protein binding	30	0.587582	1.56176	0.0015739	0.0127506	0.00947176	4842	tags=63%, list=26%, signal=47%	6422/6424/6423/4920/2487/388630/8434/6425/164284/8324/8322/11197/4919/8325/8321/79971/2535/115908/147495
GO:1901021	BP	positive regulation of calcium ion transmembrane transporter activity	37	0.552333	1.50404	0.0015739	0.0127506	0.00947176	3595	tags=43%, list=19%, signal=35%	287/57158/844/9472/6262/783/781/9104/5311/2946/6769/5336/30845/3306/9001/342667
GO:0001649	BP	osteoblast differentiation	225	0.414075	1.26059	0.0015739	0.0127506	0.00947176	5114	tags=37%, list=27%, signal=27%	6422/9464/651/4653/3479/340419/6423/26585/2662/5179/6096/63923/2247/4921/2735/2737/3488/4057/10979/5587/4880/202151/9770/3082/50846/4208/5745/117581/654/9241/658/25937/3371/3481/338773/6608/2550/2736/8646/222663/3199/1462/2254/5744/126820/8840/8626/3572/5727/22801/7480/9902/3400/7424/1591/51176/4745/56975/2697/3570/6657/659/64093/8321/30812/2263/344901/57045/3491/2201/249/4015/657/4037/115908/361…
GO:0055017	BP	cardiac muscle tissue growth	69	0.498098	1.42426	0.00159231	0.0128594	0.00955262	4814	tags=51%, list=26%, signal=38%	221476/3479/3776/2247/9472/26011/23414/2735/2066/4208/148/9241/5999/57493/7049/1901/183/2254/6910/7042/8470/2303/57057/5997/65009/7048/26281/2263/859/5950/1482/1906/657/23493/7046
GO:0071675	BP	regulation of mononuclear cell migration	115	0.456913	1.35304	0.00159231	0.0128594	0.00955262	6415	tags=52%, list=34%, signal=34%	9353/26585/347/6366/58494/148823/10563/1236/245937/7057/6387/1524/9750/729230/4856/22914/3676/81704/326/80310/146433/6504/131450/8174/11240/1240/6693/1436/4345/653/3592/100528032/23236/4478/719/257144/1235/8740/728/2660/1230/6347/1843/6846/5054/6352/5919/199/83692/1435/56833/6375/7941/3565/196527/6793/6688/2621/6868/158747
GO:0046883	BP	regulation of hormone secretion	228	0.413081	1.25871	0.00159231	0.0128594	0.00955262	6780	tags=46%, list=36%, signal=30%	1268/6422/3745/111/185/116/6869/886/9607/169026/640/6865/6616/2850/3741/2587/25924/9971/9370/4825/2822/654/1393/143425/2852/1113/2550/4856/114899/222546/2044/952/5071/4826/183/1813/5443/2695/3670/57555/6833/5028/2641/2922/9024/6343/8447/2697/8609/114131/51738/3667/1601/240/3623/2645/6447/1080/51762/3952/8111/1588/1908/846/5950/4760/114/63036/18/1906/2864/3625/252983/134/353500/23409/150/6352/668/…
GO:1905314	BP	semi-lunar valve development	41	0.546041	1.49985	0.00161071	0.0129532	0.00962232	5472	tags=63%, list=29%, signal=45%	9353/2006/6586/11117/26508/6091/6092/7042/57057/140628/2625/64220/7075/2702/659/4853/4772/1482/7040/4878/23493/7291/6093/4846/6591/23462
GO:0051703	BP	biological process involved in intraspecies interaction between organisms	54	0.524452	1.47634	0.00161071	0.0129532	0.00962232	3266	tags=44%, list=18%, signal=37%	9369/9378/139411/9379/266743/57502/2894/4057/1620/2925/50944/1524/54413/552/6899/5021/1141/57555/6532/5413/1742/2922/85358/22829
GO:0035592	BP	establishment of protein localization to extracellular region	335	0.395624	1.21812	0.00161071	0.0129532	0.00962232	6803	tags=43%, list=37%, signal=28%	1268/6422/3745/111/7432/3479/116/1311/115827/9607/169026/640/6865/6616/2850/6860/3741/25924/27445/9971/5122/8736/322/4825/2822/4053/4628/654/140689/379/143425/2852/869/1113/4547/7857/9515/7043/9699/4856/387597/114899/222546/2044/952/5071/4826/284119/1813/56670/7042/2695/3670/57555/6833/1910/5027/2149/7273/19/2641/6623/3593/7099/9024/7424/135/8447/4345/55691/3592/8609/114131/51738/3667/240/945/780…
GO:0003002	BP	regionalization	351	0.387996	1.19562	0.00161071	0.0129532	0.00962232	7135	tags=49%, list=38%, signal=31%	64388/6422/5649/7704/6423/26585/2255/4223/367/7092/57453/2247/4920/64399/56033/2735/2737/718/79659/128344/7482/126668/10736/8854/2719/4208/4222/9096/9241/2294/10371/8320/3201/658/6608/2736/26508/8646/8828/3199/5087/5567/6091/6092/6899/25928/60529/1959/168507/7471/2018/3233/3670/8626/497189/9935/2303/57057/80319/130497/2668/5727/10512/7476/5090/23432/4838/3684/140628/6604/199221/221400/286204/472/…
GO:1903587	BP	regulation of blood vessel endothelial cell proliferation involved in sprouting angiogenesis	17	0.656806	1.62743	0.00161326	0.0129532	0.00962232	3518	tags=65%, list=19%, signal=53%	4804/185/2247/7057/26051/79812/3593/187/3592/100506013/57608
GO:0032809	CC	neuronal cell body membrane	28	0.597982	1.57175	0.00161394	0.0129532	0.00962232	5729	tags=75%, list=31%, signal=52%	3745/933/2558/3737/491/1524/3751/6530/23769/3746/9312/57463/85397/3748/114/6531/7070/3747/9498/478/90249
GO:0005652	CC	nuclear lamina	10	-0.581993	-1.98559	0.00162321	0.0130142	0.00966762	7783	tags=100%, list=42%, signal=58%	78994/8573/26502/4000/256329/6839/4001/5111/3692
GO:0010721	BP	negative regulation of cell development	174	0.43258	1.30449	0.00162912	0.0130481	0.0096928	6014	tags=47%, list=32%, signal=32%	2045/4916/3479/2192/223117/7143/9423/9723/6860/2487/23500/2200/4057/4880/283659/1620/23111/4825/1903/9241/10371/4133/2258/6585/1630/80031/5764/1600/5802/56920/6356/4776/5744/57556/10500/4168/4099/6833/1910/494551/10512/1949/84376/54437/7476/4838/3400/4882/9856/53335/9706/7442/1030/10859/8829/859/7224/8831/9037/657/7070/23189/22902/54209/1946/359845/51265/393/79727/54910/4038/3196/80128/8408/2147/…
GO:0099095	MF	ligand-gated anion channel activity	18	0.649994	1.62851	0.00164225	0.0131397	0.00976082	4985	tags=83%, list=27%, signal=61%	2558/2743/2567/2566/8001/2564/2561/2555/1080/2560/2741/2557/2562/2554/2742
GO:0042551	BP	neuron maturation	45	0.533312	1.48009	0.00166594	0.0133018	0.00988125	4955	tags=53%, list=27%, signal=39%	4653/577/6900/120892/718/5979/163175/1909/57731/54738/596/51412/1910/84530/59277/6376/53335/30813/342035/30819/10882/1028/26047/8578
GO:0019724	BP	B cell mediated immunity	143	0.436827	1.3041	0.00166594	0.0133018	0.00988125	6570	tags=50%, list=35%, signal=33%	730/1380/2208/202309/1378/721/718/720/930/716/5788/715/695/710/940/3111/959/1439/1191/51311/2213/10666/57379/10747/1379/939/100423062/729/3112/3543/3117/7292/30009/3586/50615/3426/1235/84174/3581/23075/3558/604/3118/7040/4049/3263/958/2214/3120/3109/100141515/3635/200558/54209/51279/64127/55061/7158/4292/6375/714/2209/3565/713/3115/50943/727/712/3122/3113/1401/3119
GO:0016917	MF	GABA receptor activity	22	0.62633	1.61351	0.00167598	0.0133683	0.00993062	4867	tags=77%, list=26%, signal=57%	2558/2567/2566/2550/2564/9568/2570/2561/2568/2555/2560/165829/55879/2557/2562/2554/2569
GO:0043954	BP	cellular component maintenance	63	0.510994	1.45007	0.00168435	0.0134091	0.00996092	6012	tags=57%, list=32%, signal=39%	93649/577/27445/10979/8506/140689/869/55243/8927/91752/2213/57126/57555/2149/1742/1436/25861/26059/2534/9788/10882/8831/2904/348/54209/9076/23085/3480/5657/494513/22941/3801/5621/643866/4983/7082
GO:0005041	MF	low-density lipoprotein particle receptor activity	15	0.677031	1.65231	0.00168455	0.0134091	0.00996092	3384	tags=60%, list=18%, signal=49%	53353/948/55576/7436/23166/4036/4035/29967/4973
GO:0099623	BP	regulation of cardiac muscle cell membrane repolarization	26	0.606375	1.58527	0.0016911	0.0134474	0.00998941	5413	tags=73%, list=29%, signal=52%	287/6330/3741/2316/781/23704/3757/6331/6324/2697/3753/81033/2702/859/4878/776/6640/388591/23630
GO:0017101	CC	aminoacyl-tRNA synthetase multienzyme complex	11	-0.547278	-2.00868	0.00169379	0.013455	0.00999502	8429	tags=91%, list=45%, signal=50%	1615/2058/4141/3376/9255/5917/3735/5859/7965/9521
GO:0010038	BP	response to metal ion	346	0.393891	1.2138	0.00170275	0.0135124	0.0100377	5149	tags=35%, list=28%, signal=26%	845/3778/22871/4884/3736/5563/5179/120892/79901/169026/1261/3779/1740/2167/3815/3777/6262/6860/10235/7220/6263/8912/4137/83849/23208/5122/4208/2822/148281/654/1393/7057/143425/7018/4547/6649/341359/6857/387758/342618/8913/7412/6622/5071/5176/6331/825/5311/3746/596/1813/4776/4129/56670/84258/6261/25932/125981/5336/7222/6833/5027/84329/10242/127833/7273/127550/1742/246/3707/1536/55532/107/358/14440…
GO:0006744	BP	ubiquinone biosynthetic process	17	-0.469063	-2.05872	0.00170713	0.0135194	0.0100429	9886	tags=100%, list=53%, signal=47%	160760/80219/10229/57107/79934/56997/51004/29914/84274/51805/57017/51117/4704/27235/23590/2232
GO:1901663	BP	quinone biosynthetic process	17	-0.469063	-2.05872	0.00170713	0.0135194	0.0100429	9886	tags=100%, list=53%, signal=47%	160760/80219/10229/57107/79934/56997/51004/29914/84274/51805/57017/51117/4704/27235/23590/2232
GO:1901654	BP	response to ketone	186	0.427514	1.29139	0.00172116	0.0136167	0.0101151	6897	tags=48%, list=37%, signal=30%	6422/111/9353/4916/1545/6363/5563/4747/6869/367/6366/108/6586/5737/266743/2/1236/7057/7049/7043/114907/552/387758/952/5176/687/2908/4129/5021/5244/7042/11184/5729/54331/1536/107/358/857/3490/7292/4478/10628/114131/1080/6915/2770/2354/2560/10631/167127/2660/7040/114/383/2153/5290/1906/2155/3158/15/1646/1373/6898/1946/9076/3480/5734/54464/8837/867/5030/5327/5020/54206/7097/5031/50943/5732/2693/5581…
GO:0071871	BP	response to epinephrine	14	0.691439	1.66851	0.0017346	0.0136984	0.0101759	2592	tags=50%, list=14%, signal=43%	5179/6262/9370/55328/493/6622/5142
GO:0034185	MF	apolipoprotein binding	18	0.648843	1.62563	0.00173503	0.0136984	0.0101759	5360	tags=72%, list=29%, signal=51%	4137/4547/7436/19/4018/4035/4023/5340/11006/3931/54209/3990/4038
GO:0060512	BP	prostate gland morphogenesis	28	0.595684	1.56571	0.00174305	0.0137478	0.0102126	2596	tags=39%, list=14%, signal=34%	6422/2255/367/9420/2099/9241/3371/23213/4313/8626/3400
GO:0034694	BP	response to prostaglandin	31	0.580124	1.54736	0.00175798	0.0138374	0.0102791	6135	tags=71%, list=33%, signal=48%	6422/6363/5563/338/6366/5737/2/1236/7049/5729/54331/7292/1906/3158/15/1646/5734/5030/5020/5031/5732/5581
GO:0060041	BP	retina development in camera-type eye	147	0.440239	1.31611	0.00175798	0.0138374	0.0102791	6408	tags=52%, list=34%, signal=35%	1545/7275/6096/91156/2823/1641/4915/196740/57030/491/1735/5979/54549/5961/658/2916/5156/493/246213/23363/5158/50939/57381/5797/5176/7068/221935/56853/7042/25932/51761/23418/1826/4693/5159/10002/6604/286204/343035/8322/84465/10461/22899/30813/659/4867/5146/30812/8829/6496/5950/4760/5145/121643/3913/6247/57096/7070/94/22882/43/6101/56890/6505/7287/1282/94137/6497/3975/7021/25945/25806/585/6121/5783…
GO:0000491	BP	small nucleolar ribonucleoprotein complex assembly	12	-0.532301	-2.01016	0.00180425	0.0141873	0.010539	8708	tags=100%, list=47%, signal=53%	54680/9326/92345/55164/26747/55011/6880/8607/4809/10856/121053
GO:0097120	BP	receptor localization to synapse	56	0.516696	1.45524	0.0018132	0.0142144	0.0105592	3303	tags=38%, list=18%, signal=31%	22871/5649/4884/56899/9211/27092/6616/3798/1740/10082/3800/388336/201134/23426/57554/59284/1742/160622/57576/112755/80852
GO:0014033	BP	neural crest cell differentiation	94	0.473796	1.38082	0.0018132	0.0142144	0.0105592	6716	tags=59%, list=36%, signal=38%	6422/9464/223117/55698/9723/2487/2066/8854/4208/5979/10371/1000/1909/80031/6608/56920/8828/2335/3357/8929/6899/57556/10500/3670/1910/2303/2668/10512/54437/309/5308/30812/3911/8829/1908/340665/1906/9037/657/2348/7291/83989/84541/54910/6591/10370/10501/6664/4254/3084/4902/90/80326/145258/9965
GO:0046578	BP	regulation of Ras protein signal transduction	186	0.427313	1.29079	0.0018132	0.0142144	0.0105592	6482	tags=52%, list=35%, signal=34%	4653/3479/2255/2840/115557/84636/27334/5294/148/2843/286530/9750/5662/57493/25959/440073/137735/4914/6091/2151/4803/2846/5962/1281/1902/7042/10395/10125/5159/5923/2149/19/9290/3707/2841/64926/8477/9639/5924/83478/79933/115727/10156/9265/9002/9754/27128/100271927/10161/4853/54922/335/8829/90627/604/9922/8831/22898/23362/221938/440730/83892/23189/348/1435/10251/51196/10252/397/27/4650/3688/867/2282…
GO:0060740	BP	prostate gland epithelium morphogenesis	26	0.604506	1.58039	0.00182048	0.014257	0.0105908	2596	tags=42%, list=14%, signal=36%	6422/2255/367/9420/2099/9241/3371/23213/4313/8626/3400
GO:0045907	BP	positive regulation of vasoconstriction	32	0.574752	1.53735	0.00183161	0.0143009	0.0106235	3965	tags=56%, list=21%, signal=44%	3356/6869/10800/554/148/552/342527/952/5021/1621/3274/2149/146/219537/857/2702/6915/846
GO:0005891	CC	voltage-gated calcium channel complex	44	0.549334	1.52054	0.00183161	0.0143009	0.0106235	4576	tags=59%, list=25%, signal=45%	27092/785/783/774/8912/775/777/781/55799/8913/6261/786/8911/59284/59285/779/5142/773/257044/3306/257062/9254/5144/57828/57685/776
GO:0017080	MF	sodium channel regulator activity	37	0.549753	1.49701	0.00183161	0.0143009	0.0106235	4300	tags=43%, list=23%, signal=33%	6327/4842/2259/6330/53826/5348/55800/2822/2258/493/486/53822/6324/859/4734/2257
GO:0061572	BP	actin filament bundle organization	156	0.437456	1.31455	0.00185002	0.0144301	0.0107194	5596	tags=41%, list=30%, signal=29%	6422/171024/4653/56776/119/6869/2006/10580/1809/23671/84952/11170/800/2316/10979/90102/10391/22843/50944/79822/7043/339768/51466/5071/1901/395/5962/1902/10395/11346/56907/221692/1490/6376/8477/9639/55704/79933/22899/22998/85358/55616/3936/83543/7168/7454/335/23075/8829/9788/5295/5341/199/7046/5345/5217/6093/9647/5734/359845/23332/10411/4739/87
GO:0090136	BP	epithelial cell-cell adhesion	17	0.654147	1.62084	0.00185571	0.01446	0.0107416	1490	tags=35%, list=8%, signal=32%	7060/1545/29119/11149/3815/4856
GO:0005109	MF	frizzled binding	38	0.551472	1.50404	0.00186843	0.0144719	0.0107505	2820	tags=39%, list=15%, signal=34%	6422/4653/84870/4920/7484/7482/7483/7471/4693/7480/7476/7475/1742/51384/8324
GO:0045576	BP	mast cell activation	65	0.510116	1.45067	0.00186843	0.0144719	0.0107505	5838	tags=57%, list=31%, signal=39%	1268/1269/640/3815/5730/5169/5294/85480/2294/64109/695/1113/116449/8832/284021/5293/10666/10125/8013/5729/399/2623/27040/2241/10814/2242/2268/2624/26762/30817/3937/3596/7462/867/9846/146722/3565
GO:0005254	MF	chloride channel activity	73	0.495362	1.42178	0.00186843	0.0144719	0.0107505	4985	tags=52%, list=27%, signal=38%	203859/2558/5348/2743/2567/2566/8001/1188/1193/2564/115111/94015/25932/121601/57348/2570/2561/54102/2568/1187/53405/2555/7439/1080/2560/57101/1179/56923/55879/2741/54831/2557/2562/2554/2569/9635/1185/2742
GO:0060419	BP	heart growth	78	0.480076	1.38586	0.00186843	0.0144719	0.0107505	4814	tags=47%, list=26%, signal=35%	221476/3479/3776/2247/9472/26011/23414/2735/2066/4208/148/9241/5999/57493/7049/1901/183/2254/32/6910/7042/8470/2303/57057/5997/65009/7048/26281/2263/859/5950/1482/10409/1906/657/23493/7046
GO:0004866	MF	endopeptidase inhibitor activity	173	0.434314	1.30958	0.00186843	0.0144719	0.0107505	6337	tags=46%, list=34%, signal=31%	1285/89932/80760/721/6695/3699/718/27344/720/124857/8434/4057/2/7078/5858/327657/7980/710/135228/1470/6622/27151/5176/183/5270/4803/5627/1293/3730/50859/6691/7077/4671/5104/3698/939/9806/144568/4018/286204/1473/58189/12/199713/284293/8740/5272/11005/5918/197/164237/3700/25816/647174/5054/3053/1474/5345/347365/51232/5276/6093/7035/5273/10406/8530/5973/3827/56925/7079/5621/462/140686/5274/51156/153…
GO:0002237	BP	response to molecule of bacterial origin	331	0.395201	1.21649	0.00186843	0.0144719	0.0107505	7211	tags=49%, list=39%, signal=31%	1268/2255/1511/338/5179/6403/4842/1269/284297/5737/9590/721/5731/1991/26228/117854/9971/4057/10563/5122/4208/671/57088/1236/654/245937/388325/23641/1524/1734/2326/22914/7412/6622/10333/3587/948/7096/1439/4129/389643/2213/558/57379/5336/6401/4064/3764/1234/6833/1910/5027/10225/2149/19/7066/80380/4360/9450/114548/5142/345611/3593/6376/7099/11213/2623/923/5739/8564/3592/100528032/4353/23328/7292/353…
GO:0014820	BP	tonic smooth muscle contraction	10	0.74587	1.7082	0.00187967	0.0145444	0.0108044	4461	tags=80%, list=24%, signal=61%	3356/4638/1909/952/183/6338/80852/1906
[truncated: 499 more rows]
