# Supplementary material for: Immune infiltration and prognosis in gastric cancer: role of NAD+ metabolism-related markers
Source: PeerJ. 2024 Jul 31;12:e17833. doi: 10.7717/peerj.17833 (PMC11297443; doi:10.7717/peerj.17833)
Supplement: Supplemental Information 7 [file peerj-12-17833-s007.xlsx]

## Sheet: Sheet1
ID	setSize	enrichmentScore	NES	pvalue	p.adjust	qvalues	rank	leading_edge	core_enrichment
hsa04512	ECM-receptor interaction	87	0.605293	1.76759	9.999e-05	9.999e-05	0.00107769	5572	tags=70%, list=30%, signal=49%	7060/5649/158326/7148/1285/1311/1286/63923/7143/9899/3908/8516/1288/3680/1287/341640/3679/22987/7057/3371/7058/3690/2335/9900/8515/948/131873/3676/256076/1101/2814/1293/3672/1297/3910/22801/3339/2811/7448/1292/7450/80144/3915/1278/7059/51206/3674/3911/1284/3695/3678/3913/3912/1291/22798/3696/3685/1834/3688/1282/1277
hsa04514	Cell adhesion molecules	152	0.577082	1.73239	9.999e-05	9.999e-05	0.00107769	4709	tags=60%, list=25%, signal=45%	57863/1272/26050/22871/9369/22865/9378/6403/6900/933/257194/23114/22854/4685/9379/4684/57689/152404/3897/8516/139065/58494/3680/5010/57502/5789/9071/8506/83700/1000/5788/84189/84631/54413/5802/940/6614/7412/5797/3111/959/3676/1462/3683/23705/94030/6402/10666/6401/4099/7122/57555/8174/5175/201633/80380/6693/3684/149461/3112/84628/925/6383/923/3117/114798/22829/3689/914/941/10686/1003/64101/947/927…
hsa05412	Arrhythmogenic right ventricular cardiomyopathy	77	0.592392	1.71698	9.999e-05	9.999e-05	0.00107769	2803	tags=45%, list=15%, signal=39%	1674/29119/88/6442/3908/1756/6444/6543/27092/8516/785/6262/3680/783/775/3679/6547/6445/781/1000/6546/55799/89/1496/3690/83439/8515/3676/3672/786/22801/59284/59285/779/51176
hsa04911	Insulin secretion	85	0.587365	1.7129	9.999e-05	9.999e-05	0.00107769	4588	tags=55%, list=25%, signal=42%	477/111/3778/116/117/108/886/482/5579/6616/3779/6262/2740/27445/775/3782/480/9699/5567/5582/816/486/2695/815/3780/6833/10242/779/2641/9586/1131/107/6514/196883/23236/27094/84699/2645/5330/113/11069/27345/114/64764/2864/776/3781
hsa04713	Circadian entrainment	97	0.564306	1.65756	9.999e-05	9.999e-05	0.00107769	4815	tags=56%, list=26%, signal=41%	111/116/2775/117/4842/2890/2903/108/2982/5579/6262/6263/8912/775/5592/59345/2983/3708/2891/2788/3762/8913/5567/5582/816/6261/2786/815/2893/2977/5187/8911/54331/3763/2784/107/196883/8863/23236/2892/5330/2770/113/2791/2792/5593/114/94235/10681/776/2904/55811/9252/115
hsa05414	Dilated cardiomyopathy	95	0.560872	1.64577	9.999e-05	9.999e-05	0.00107769	4285	tags=54%, list=23%, signal=42%	1674/111/5350/3479/6442/108/3908/1756/6444/6543/27092/8516/785/6262/3680/783/775/3679/6547/70/6445/781/4634/6546/55799/7043/3690/5567/8515/3676/183/7042/3672/7169/786/7273/22801/59284/59285/779/107/196883/7168/3674/9254/113/3695/3678/4607/7040/114
hsa05032	Morphine addiction	91	0.55685	1.63048	9.999e-05	9.999e-05	0.00107769	4867	tags=62%, list=26%, signal=46%	111/2775/108/5139/5579/5136/27115/2558/774/2567/5137/59345/5153/5138/2788/2566/2550/3762/5567/1812/5582/2564/9568/2786/2570/54331/5142/3763/2561/2784/2568/8622/107/196883/773/2555/10846/5140/157/4988/2770/2560/113/5144/2791/55879/2792/2557/114/94235/10681/2562/2554/134/115/2569
hsa04725	Cholinergic synapse	113	0.539858	1.5982	9.999e-05	9.999e-05	0.00107769	4860	tags=55%, list=26%, signal=41%	1129/111/2775/108/56479/1136/60482/5579/6572/774/775/10000/5294/59345/814/3708/2788/8973/5567/23533/5582/596/816/1141/1133/5293/3768/2786/815/1143/54331/779/3763/9586/2784/1131/107/196883/773/9132/146850/23236/1103/84699/5330/3709/2770/113/2534/2791/1132/5295/2792/114/94235/10681/64764/5290/776/1137/115/43
hsa04640	Hematopoietic cell lineage	95	0.542865	1.59294	9.999e-05	9.999e-05	0.00107769	4749	tags=57%, list=26%, signal=43%	1380/931/933/2208/1378/3815/2322/911/913/930/3568/3554/912/952/3690/3111/948/3676/2814/951/3672/3575/917/1379/7066/3684/3112/2811/1438/925/3567/1436/290/3590/3117/3570/945/914/947/927/2323/3674/921/3581/926/920/3118/3678/916/909/3559/915/3109/3563
hsa04610	Complement and coagulation cascades	84	0.543971	1.58507	9.999e-05	9.999e-05	0.00107769	6154	tags=65%, list=33%, signal=44%	730/1380/1378/2162/721/718/720/2/716/3075/5648/715/710/2151/5627/1191/10878/2157/5104/10747/2149/1379/729/3684/7448/7450/3818/9002/2159/3687/3689/719/5340/3426/11326/1675/3078/2160/728/623/7056/2153/2155/5054/3053/5345/7035/3827/714/5327/2147/713/462/727/712
hsa05410	Hypertrophic cardiomyopathy	90	0.537992	1.57402	9.999e-05	9.999e-05	0.00107769	2576	tags=41%, list=14%, signal=36%	1674/3479/5563/6442/3908/1756/6444/6543/27092/8516/785/6262/3680/783/775/3679/6547/70/6445/781/4634/6546/55799/7043/3690/8515/3676/183/7042/3672/7169/786/7273/22801/59284/59285/779
hsa04970	Salivary secretion	90	0.536162	1.56867	9.999e-05	9.999e-05	0.00107769	4285	tags=44%, list=23%, signal=34%	477/111/3778/4842/108/2982/482/5579/155/6263/491/5592/148/2983/3708/480/154/1470/492/493/952/5567/5582/486/2977/146/1131/107/196883/1473/23236/5330/3709/55503/113/683/54831/5593/280/114
hsa04925	Aldosterone synthesis and secretion	98	0.520151	1.52879	9.999e-05	9.999e-05	0.00107769	4576	tags=47%, list=25%, signal=36%	477/111/185/108/482/5579/3777/1583/491/8912/5587/775/814/3708/480/5138/492/4881/493/3762/8913/5567/57118/183/5582/4158/816/5443/815/6770/8911/1589/779/9586/107/196883/23236/23683/84699/5330/3709/113/114/64764/4878/776
hsa04724	Glutamatergic synapse	114	0.513995	1.52229	9.999e-05	9.999e-05	0.00107769	5959	tags=61%, list=32%, signal=42%	111/2775/2901/2890/2903/108/5579/2899/7220/57030/775/59345/50944/3708/8605/2898/2891/2788/2916/6506/9229/246213/5567/6512/2900/2913/5582/2786/2893/2897/54331/1742/6511/2784/107/196883/773/23236/85358/157/2892/2911/2914/8681/5330/3709/2770/6507/2917/113/116443/2791/2792/114/94235/10681/776/2904/2912/115/6505/100137049/5332/5337/22941/2793/10991/2752/116444/2744
hsa04270	Vascular smooth muscle contraction	134	0.508773	1.51775	9.999e-05	9.999e-05	0.00107769	4815	tags=49%, list=26%, signal=36%	4629/111/3778/185/72/4638/108/10335/2982/5579/3779/4660/800/10398/59/4880/775/5592/26279/148/2983/4628/5322/3708/8605/1909/4881/552/5567/94274/183/5582/2977/91807/10203/10242/146/779/4882/135/107/196883/5739/797/23236/27094/5583/5588/391013/10268/8681/5330/3709/113/1908/4659/27345/114/1906/10266/4878/776/796/553/115
hsa04723	Retrograde endocannabinoid signaling	140	0.503275	1.50442	9.999e-05	9.999e-05	0.00107769	4867	tags=40%, list=26%, signal=30%	1268/111/2775/22999/2890/108/5602/5579/2558/57030/774/775/2567/59345/3708/2891/2788/2566/3762/246213/5567/5582/2564/2786/2893/2570/54331/779/3763/2561/2784/2568/107/196883/773/2555/23236/2892/2911/5330/3709/2770/2560/113/2791/55879/2792/2557/114/94235/10681/2562/776/2554/115/2569
hsa04022	cGMP-PKG signaling pathway	165	0.497047	1.4975	9.999e-05	9.999e-05	0.00107769	4815	tags=47%, list=26%, signal=35%	477/111/5350/3778/185/4638/108/10335/2982/5139/482/6543/3779/155/10398/491/4880/775/10000/5592/6547/5294/4208/148/2983/3708/480/5138/6546/1909/154/492/4881/493/23533/1258/4776/486/2977/3764/8654/91807/1910/10242/146/779/4882/5997/9586/107/196883/146850/23236/4985/27094/5140/3667/84699/4773/5330/7225/3709/2770/4205/4772/113/4659/27345/5593/114/64764/4878/776/134/8471/150/151/115
hsa04261	Adrenergic signaling in cardiomyocytes	149	0.496986	1.49073	9.999e-05	9.999e-05	0.00107769	3885	tags=40%, list=21%, signal=32%	6332/477/111/5350/185/108/482/6330/6543/27092/785/6262/5502/783/491/775/10000/6547/70/5294/148/781/4634/5521/480/6546/55799/154/492/493/5567/23533/6331/183/596/816/486/815/7169/786/146/59284/59285/5523/779/9586/6324/107/196883/186/146850/23236/3753/84699/7168/5330/2770/9254/113/11069
hsa04726	Serotonergic synapse	113	0.502074	1.48635	9.999e-05	9.999e-05	0.00107769	5741	tags=58%, list=31%, signal=40%	111/2775/3356/5579/7220/3363/774/775/59345/3708/8605/2788/3762/3751/5567/5582/3357/4129/2786/6571/7166/3359/1559/6532/3355/54331/779/246/3763/2561/2784/247/773/23236/3360/3362/240/5742/8681/5330/3709/285242/2770/2560/239/9177/2791/1557/1558/2792/1843/94235/10681/2562/6570/776/3781/121278/100137049/10411/5332/3354/170572/2793/778
hsa04974	Protein digestion and absorption	103	0.500753	1.47619	9.999e-05	9.999e-05	0.00107769	6403	tags=61%, list=34%, signal=40%	477/1310/1285/7373/1286/1295/2006/482/6543/81578/1288/1359/1287/1296/84570/1360/6547/480/6546/7512/6564/131873/11136/256076/169044/486/1300/1281/1293/1297/1307/1292/3769/6519/1306/1357/91522/1278/1289/255631/1303/59272/120103/1284/51032/1290/63036/1302/136227/4225/1291/80781/6505/57642/1282/1277/478/206358/1280/5547/1305/153201/1358
hsa05144	Malaria	50	0.61358	1.7233	0.0001	0.0001	0.00107769	4417	tags=64%, list=24%, signal=49%	7060/1311/2532/6403/1378/3082/7057/7058/7043/22914/7412/959/2995/948/3683/7042/6401/1379/5175/7099/6383/3592/4035/100528032/54106/3689/7059/3586/3820/7040/6347/958
hsa04927	Cortisol synthesis and secretion	65	0.550649	1.57596	0.00019998	0.00019998	0.00188634	4815	tags=54%, list=26%, signal=40%	111/185/3776/108/3777/1583/8912/775/3708/3739/8913/5087/5567/183/4158/5443/6770/8911/1589/779/9586/8622/107/196883/1586/23236/84699/5330/3709/113/114/56246/64764/776/115
hsa04360	Axon guidance	182	0.457209	1.38326	0.00019998	0.00019998	0.00188634	5958	tags=48%, list=32%, signal=33%	2045/56963/9353/91653/91584/223117/2042/56896/22854/151449/285220/57689/6586/3897/5063/9423/9723/7220/10398/4917/10371/6387/658/6585/1630/2043/80031/6608/1073/7223/10154/56920/2044/6091/6092/8633/4776/816/137970/5293/57556/815/5336/7222/57144/10500/5727/10512/2051/1949/54437/84628/59277/7852/4773/64101/659/7225/2770/5365/8829/2534/9901/84552/7224/2242/5295/64221/1808/5290/9037/3611/2047/55740/194…
hsa05033	Nicotine addiction	40	0.600696	1.65529	0.00020004	0.00020004	0.00188634	4867	tags=70%, list=26%, signal=52%	2890/2903/2558/57030/774/2567/2891/2566/246213/8973/2564/1141/2893/2570/2561/2568/773/2555/2892/2560/116443/55879/2557/2562/2554/2904/1137/2569
hsa04727	GABAergic synapse	89	0.515731	1.50806	0.00029997	0.00029997	0.00261107	6043	tags=64%, list=32%, signal=43%	111/2775/108/5579/2558/774/775/2567/59345/5334/2788/2566/2550/5567/5582/2564/9568/2786/2570/54331/779/3763/2561/2784/2568/107/196883/773/2555/23710/9001/2770/2560/113/2791/55879/2792/2557/114/94235/10681/2562/18/66008/6529/776/2554/115/2569/6540/2793/778/10991/2752/6538/2744/2572
hsa04924	Renin secretion	69	0.521102	1.49674	0.00029997	0.00029997	0.00261107	4604	tags=49%, list=25%, signal=37%	111/3778/185/116/117/2982/5139/5136/155/775/5137/2983/5153/3708/1909/154/4881/5567/183/2977/779/358/23236/5140/5330/3709/2770/1908/1179/5593/1906/4878/776/134
hsa04611	Platelet activation	123	0.46568	1.38417	0.00049995	0.00049995	0.00404095	5728	tags=51%, list=31%, signal=36%	111/4638/108/2982/64805/10235/10000/5592/5294/2983/3708/8605/695/5023/3690/5567/23533/2814/1281/5293/10125/54518/5336/2977/91807/5028/2149/2811/107/196883/7450/5739/146850/23236/9002/5742/1278/51206/3674/8681/5330/6915/3709/2770/7094/113/2534/4659/5295/5593/114/5290/115/3937/2212/6093/100137049/4846/3688/1277/8503/5332/2147
hsa04072	Phospholipase D signaling pathway	146	0.460596	1.37993	0.00049995	0.00049995	0.00404095	5810	tags=50%, list=31%, signal=35%	111/185/108/2205/2206/5737/3815/554/10000/9162/5294/399694/8605/1607/2916/5156/22808/552/23533/183/2913/80310/2846/1902/5293/5336/1608/5159/2149/23566/53358/56895/107/196883/1950/26052/8611/146850/23236/9265/1759/56034/27128/2549/2911/2914/10161/8613/8681/5330/25759/2917/113/2534/11069/5295/114/5290/2912/553/115/5335/100137049/160851/10411/9846/8503/5332/5337/6654/2147/23396/139189
hsa04972	Pancreatic secretion	100	0.483958	1.42382	0.00059994	0.00059994	0.00468193	4898	tags=45%, list=26%, signal=33%	477/111/3778/108/886/482/5579/6262/1359/7220/1360/491/26279/5322/3708/480/1811/6344/492/493/952/5582/486/6343/1131/107/196883/23236/1357/5407/391013/1080/5330/3709/113/51032/1179/683/280/114/63036/115/5406/8671/9635
hsa04728	Dopaminergic synapse	131	0.452782	1.34965	0.00069993	0.00069993	0.00528017	4628	tags=40%, list=25%, signal=30%	111/2775/2890/2903/5602/5579/3798/774/775/10000/2774/59345/5521/3708/2891/2788/3800/3762/1816/5567/50632/1812/5582/1813/816/4129/2786/815/2893/6571/6323/5523/54331/3763/9586/2784/773/23236/84699/2892/5330/3709/2770/2791/2792/94235/10681/6531/64764/6570/776/2904
hsa05146	Amoebiasis	101	0.479144	1.41029	0.00079992	0.00079992	0.00583982	5649	tags=50%, list=30%, signal=35%	1285/1511/1286/3908/5579/1288/1287/911/913/2774/3554/7043/912/2335/5567/5582/1281/5293/7042/3910/3684/3593/9630/7099/107/3592/23236/3915/3689/1278/3586/5330/3911/5272/1284/7040/3913/5295/909/383/5290/3912/7414/22798/910/5273/1282/1277/87/8503/5332
hsa00120	Primary bile acid biosynthesis	17	0.684159	1.70882	0.000915565	0.000915565	0.0064694	4517	tags=59%, list=24%, signal=45%	9420/9023/10858/51302/1582/570/1593/6718/8309/1581
hsa04976	Bile secretion	86	0.48959	1.42877	0.0009999	0.0009999	0.0064694	5685	tags=51%, list=31%, signal=36%	477/111/108/482/9971/5243/480/361/6344/5567/6822/5244/486/123264/10864/6343/107/196883/358/570/7367/1080/9429/6555/79799/113/10720/6554/114/8647/1581/64241/3781/343/115/8671/1576/54577/1244/6579/200931/478/10257/9376
hsa04921	Oxytocin signaling pathway	154	0.44106	1.32484	0.0009999	0.0009999	0.0064694	3841	tags=37%, list=21%, signal=30%	111/2775/5563/4638/108/2982/5579/27092/785/4660/6262/783/6263/10398/775/5294/4208/781/2983/814/3708/8605/55799/4881/3762/952/5567/57118/23533/5582/4776/816/5021/6261/3768/815/2977/91807/786/59284/59285/779/4882/3763/5997/107/196883/146850/23236/4773/8681/5330/3709/2770/9254/4772/113
hsa05340	Primary immunodeficiency	37	0.572246	1.56718	0.0010005	0.0010005	0.0064694	4559	tags=59%, list=25%, signal=45%	23495/930/973/115650/5788/695/959/3718/326/57379/3575/7535/925/3543/4261/927/29851/926/920/916/958/915
hsa04918	Thyroid hormone synthesis	75	0.500372	1.44778	0.00109989	0.00109989	0.00672831	5649	tags=48%, list=30%, signal=34%	477/111/7173/108/482/5579/3708/480/5567/5582/7276/486/7038/7253/9586/107/196883/4036/23236/2882/433/84699/2878/5330/3709/113/493869/7252/114/64764/213/115/6528/5172/478/5332
hsa04672	Intestinal immune network for IgA production	45	0.554814	1.5443	0.0011	0.0011	0.00672831	6570	tags=76%, list=35%, signal=49%	23495/115650/6387/940/3111/959/3676/57379/10803/8174/3112/608/3567/2826/3117/7852/941/3586/10673/29851/3558/3118/3695/7040/958/942/3109/9020/3600/3565/3115/3122/3113/3119
hsa04062	Chemokine signaling pathway	189	0.427038	1.2936	0.00119988	0.00119988	0.0071461	5736	tags=46%, list=31%, signal=32%	111/6363/6366/108/643/5579/10235/6358/10000/10563/5294/1233/59345/399694/1236/3702/2829/6387/1524/2788/1794/6360/729230/5567/6356/23533/3718/9844/5293/6368/1237/2786/7074/5336/1234/10803/54331/57580/6376/53358/2784/107/6367/196883/2826/9547/146850/23236/7409/7852/157/653361/1235/6357/7454/5330/25759/2770/4283/6777/113/2791/131890/2268/1230/6347/5295/2792/114/94235/6846/10681/5290/6773/6352/115/30…
hsa04923	Regulation of lipolysis in adipocytes	56	0.524406	1.48532	0.00129987	0.00129987	0.00754311	4815	tags=57%, list=26%, signal=42%	111/4886/5733/108/2167/155/10000/5592/4852/154/4881/5567/5293/7253/5346/107/196883/5140/3667/5742/2770/113/5295/7252/5593/114/5290/100509620/4878/134/8471/115
hsa04730	Long-term depression	60	0.511117	1.45563	0.00139986	0.00139986	0.00772786	4278	tags=43%, list=23%, signal=33%	3479/2775/4842/2890/2982/5579/5592/2983/3708/8605/2891/5582/6261/2781/2977/773/23236/2895/2892/2911/8681/5330/3709/2770/10842/5593
hsa04961	Endocrine and other factor-regulated calcium reabsorption	53	0.52237	1.47373	0.0014	0.0014	0.00772786	3640	tags=38%, list=20%, signal=30%	477/482/5579/6543/2099/491/6547/9365/5745/480/6546/492/493/5567/5582/486/26052/23236/1759/5330
hsa04742	Taste transduction	83	0.484896	1.41202	0.00159984	0.00159984	0.00862069	6034	tags=60%, list=32%, signal=41%	22953/5136/2558/6328/775/5137/6326/5153/2550/80835/5567/6335/9568/10021/3359/5028/3355/342372/2784/6338/1131/196883/773/2555/23236/54429/259295/2911/2914/5330/285242/50838/9177/2557/114/259293/255022/50839/259294/2554/259289/40/259290/6340/5030/5332/3354/170572/338398/50832
hsa04971	Gastric acid secretion	76	0.487497	1.41128	0.00179982	0.00179982	0.00947274	5953	tags=51%, list=32%, signal=35%	477/111/4638/3776/108/482/6750/5579/3708/480/887/5567/5582/115111/816/815/91807/3274/3773/1131/107/196883/23236/6752/1080/5330/3709/2770/113/114/389015/3758/115/54207/495/478/5332/340156/3766
hsa04540	Gap junction	88	0.479471	1.40087	0.0019998	0.0019998	0.0100685	4285	tags=43%, list=23%, signal=33%	111/3356/108/2982/5579/5592/2983/3708/10382/5156/5567/1812/5582/3357/1813/80310/1902/2977/7846/5159/7278/347733/84617/107/57369/196883/1950/23236/2697/56034/2911/5330/3709/2770/113/112714/5593/114
hsa00350	Tyrosine metabolism	35	0.566011	1.54117	0.002002	0.002002	0.0100685	2285	tags=31%, list=12%, signal=28%	125/316/7306/7173/8639/127/1638/126/4129/1621/124
hsa04926	Relaxin signaling pathway	129	0.440924	1.31367	0.00289971	0.00289971	0.0142663	5736	tags=46%, list=31%, signal=32%	111/2775/1285/4842/1286/108/5602/1288/2277/1287/59/10000/59345/399694/2788/5567/1281/5293/2786/4313/1910/54331/53358/7424/9586/2784/107/196883/23236/1278/84699/7048/5330/25759/2770/113/1284/2791/7040/5295/2792/114/94235/10681/64764/5290/1906/7046/115/6013/4846/6019/1282/59350/1277/8503/5332/6654/2793
hsa04061	Viral protein interaction with cytokine and cytokine receptor	97	0.462575	1.35874	0.00329967	0.00329967	0.0158887	5192	tags=46%, list=28%, signal=34%	6363/6366/643/6358/10563/1233/1236/2829/6387/1524/6360/729230/6356/3587/146433/6368/1237/1234/10803/3572/6376/6367/2826/1436/9547/3570/7852/3586/1235/8740/6357/4283/8809/3558/11009/8807/1230/6347/4049/6846/3559/6352/3560/1435/57007
hsa04929	GnRH secretion	64	0.49035	1.40172	0.00389961	0.00389961	0.0183863	5741	tags=52%, list=31%, signal=36%	5579/7220/8912/775/10000/3782/3708/2852/2550/7223/3762/8913/5582/5293/9568/3780/8911/779/3763/23236/5330/3709/2100/7224/5295/2796/5290/776/3781/610/8503/5332/778
hsa04260	Cardiac muscle contraction	83	0.46987	1.36826	0.00459954	0.00459954	0.0212438	4022	tags=33%, list=22%, signal=26%	477/845/482/6543/27092/785/6262/783/775/6547/70/781/4634/480/6546/55799/486/7169/786/59284/59285/779/3270/7168/9254/1346/1339
hsa04933	AGE-RAGE signaling pathway in diabetic complications	100	0.445883	1.3118	0.0069993	0.0069993	0.031681	7630	tags=61%, list=41%, signal=36%	185/1285/1286/5602/5579/1288/2277/1287/10000/7043/7412/2335/183/596/1281/5293/7042/5336/6401/4313/1536/7424/23236/50507/1278/7048/5330/84812/4772/6777/1284/7056/7040/6347/5295/5290/1906/5054/7046/6776/5335/51196/4846/2308/1282/1277/8503/5332/5581/5600/3383/3717/1958/5578/4089/177/6772/7423/3725/6774/5333
hsa04371	Apelin signaling pathway	139	0.423441	1.26527	0.00819918	0.00819918	0.0363844	4815	tags=40%, list=26%, signal=30%	111/185/5563/4842/4638/108/6543/6262/6263/59/10000/440738/6547/5294/4208/59345/4634/814/3708/6546/2788/22808/5567/23533/6261/2786/91807/1490/54331/5346/2784/107/196883/187/146850/23236/100506013/4854/5140/5330/3709/2770/4205/113/2791/10014/2792/53632/114/94235/10681/5054/9759/55811/7046/115
hsa04973	Carbohydrate digestion and absorption	45	0.506499	1.40982	0.0091	0.0091	0.0396053	5649	tags=49%, list=30%, signal=34%	477/482/5579/10000/480/3938/486/5293/6514/23236/2538/5330/6476/6518/5295/280/5290/776/8972/478/8503/5332
hsa04145	Phagosome	149	0.414034	1.24191	0.010399	0.010399	0.0436129	6571	tags=46%, list=35%, signal=30%	7060/1311/4842/81035/718/79659/9103/1780/7057/715/10382/7058/6441/3690/3111/10333/948/2213/7846/534/22925/9902/7278/4360/347733/3684/3112/84617/1536/7099/4353/3117/4481/64581/30835/3689/653361/7059/4973/78989/50617/525/3118/3678/10332/112714/2214/11151/3109/200576/2212/113457/3685/3688/4689/51807/2209/8411/7097/3115/5289/1783/3122/4688/3113/338382/3119/1514
hsa04750	Inflammatory mediator regulation of TRP channels	98	0.440982	1.2961	0.010499	0.010499	0.0436129	6276	tags=51%, list=34%, signal=34%	111/3479/3356/108/5602/5579/3708/8605/3554/4914/5567/5582/3357/4803/816/5293/815/5336/107/196883/23236/7442/5583/5588/8681/5330/3709/623/113/239/5295/114/55515/5290/79054/115/40/5335/5734/100137049/162514/3827/51802/8503/5332/5732/51393/5581/5600/818
hsa04978	Mineral absorption	60	0.477826	1.36082	0.0105989	0.0105989	0.0436129	1968	tags=23%, list=11%, signal=21%	477/79901/482/6543/140803/491/6547/480/6546/7018/1811/492/493/486
hsa04310	Wnt signaling pathway	169	0.407933	1.2303	0.0132987	0.0132987	0.0537446	3850	tags=31%, list=21%, signal=25%	6422/1501/84870/284654/340419/6424/6423/5602/5579/4920/166336/2487/7484/23500/7482/144165/7483/6425/4316/27123/164284/57216/83439/5567/5176/5582/4776/816/7471/815/8840/80319/7480/7476/7475/51384/51176/8324/8322/11197/4919/23236/85407/22943/8325/7091/64321/4773/894/5330/8321/4772/343637
hsa04670	Leukocyte transendothelial migration	112	0.424634	1.25638	0.0159984	0.0159984	0.0635209	5661	tags=46%, list=30%, signal=32%	29119/5579/58494/5010/9071/10398/83700/3702/6387/1496/7412/3676/3683/5582/5293/5336/4313/7122/5175/3684/149461/399/1536/7409/4478/7852/3689/653361/10686/1003/2770/49861/11069/7294/5295/83593/5290/7070/7414/83692/5335/9076/6093/100288814/6494/3688/4689/10411/87/8503/10451
hsa04350	TGF-beta signaling pathway	94	0.435527	1.27728	0.0164984	0.0164984	0.0643765	4814	tags=39%, list=26%, signal=29%	64388/56963/26585/392255/7044/151449/4052/4093/2200/1634/654/9241/7057/658/8200/7043/79875/8646/7042/2331/269/4838/3400/653/1030/5308/7048/659/83729/7040/3625/657/353500/285704/148738/3624/7046
hsa03060	Protein export	23	-0.372228	-1.68893	0.0169492	0.0169492	0.0650146	11688	tags=100%, list=63%, signal=37%	55176/11231/60559/83943/6734/6727/6729/196294/6728/9789/6726/6731/29927/6730/23478/5018/90701/3309/23480/28972/58477/10952
hsa02010	ABC transporters	45	0.485535	1.35147	0.0218	0.0218	0.0822281	5901	tags=53%, list=32%, signal=37%	10351/10350/23460/10060/225/340273/5243/10349/154664/5244/6833/64137/24/19/1080/21/9429/8647/64241/1244/368/10257/23461/10057
hsa04614	Renin-angiotensin system	23	0.550679	1.43142	0.0223273	0.0223273	0.0828363	4763	tags=48%, list=26%, signal=36%	185/1511/1215/1359/116512/183/290/186/59272/2028/4012
hsa05320	Autoimmune thyroid disease	40	0.493629	1.36026	0.0238048	0.0238048	0.0868934	6570	tags=65%, list=35%, signal=42%	7173/940/3111/959/7038/7253/3112/3567/3117/941/3586/3558/3118/7252/958/942/3109/1493/355/356/3565/3115/3122/3113/5551/3119
hsa04340	Hedgehog signaling pathway	55	0.464745	1.31457	0.0261	0.0261	0.0929543	3482	tags=38%, list=19%, signal=31%	91653/8643/64399/2121/2735/2737/132884/57758/2619/50846/50937/6608/2736/5567/596/5727/23432/4036/374654/157/894
hsa04913	Ovarian steroidogenesis	49	0.473653	1.32812	0.0262974	0.0262974	0.0929543	5382	tags=45%, list=29%, signal=32%	111/3479/1545/108/1583/654/8605/5567/3973/6770/107/196883/1586/240/8681/1588/113/114/115/3480/100137049/2492
hsa04721	Synaptic vesicle cycle	77	0.440055	1.27545	0.0266973	0.0266973	0.0929543	4469	tags=36%, list=24%, signal=28%	22999/6616/440279/6572/57030/774/6506/246213/6857/6530/6512/6571/6532/534/6511/773/26052/112755/1759/50617/525/6507/23025/10814/2054/6531/6529/6570
hsa05030	Cocaine addiction	49	0.472032	1.32358	0.0276972	0.0276972	0.0949746	4751	tags=45%, list=26%, signal=34%	111/2903/8787/2891/5567/1812/2913/1813/4129/6571/1742/9586/84699/2770/2354/116443/6531/64764/26086/6570/2904/2912
hsa04916	Melanogenesis	101	0.421265	1.23993	0.0288971	0.0288971	0.09761	4815	tags=40%, list=26%, signal=30%	111/2775/7306/108/5579/3815/7484/7482/7483/1638/83439/5567/5582/816/7471/5443/815/1910/4286/7480/7476/7475/51384/51176/107/8324/8322/196883/23236/8325/84699/5330/2770/8321/113/114/64764/1906/2535/115
hsa05330	Allograft rejection	35	0.493685	1.34424	0.0346346	0.0346346	0.113887	6772	tags=69%, list=36%, signal=44%	940/3111/959/3112/3593/3567/3592/3117/941/3586/3558/3118/958/942/3109/355/356/3565/3115/3122/3113/5551/3119/3458
hsa00511	Other glycan degradation	18	-0.3894	-1.6195	0.0347222	0.0347222	0.113887	11367	tags=100%, list=61%, signal=39%	4758/4123/10825/23324/175/3073/284004/4126/4759/64772/2629/3074/2517/57704/2720/2519/129807
hsa00532	Glycosaminoglycan biosynthesis - chondroitin sulfate / dermatan sulfate	20	0.550341	1.40541	0.0365398	0.0365398	0.118136	6622	tags=70%, list=36%, signal=45%	51363/9469/10090/55454/29940/337876/55790/56548/50515/166012/64131/55501/22856/113189
hsa00430	Taurine and hypotaurine metabolism	16	0.573837	1.42045	0.0382341	0.0382341	0.121873	4575	tags=56%, list=25%, signal=42%	1036/2327/339896/2326/2687/570/2328/2686/51380
hsa05321	Inflammatory bowel disease	63	0.444926	1.27091	0.039896	0.039896	0.125404	7588	tags=68%, list=41%, signal=41%	6095/7043/3111/7042/4094/3112/3593/6775/7099/3567/2625/3592/3117/7100/30009/3586/50615/8809/4772/3558/3118/3594/7040/8807/3595/59067/149233/3109/3596/64127/3565/7097/3115/50943/3122/3113/3119/3458/6772/3561/3127/3725/6774
hsa05140	Leishmaniasis	74	0.432837	1.25065	0.0417958	0.0417958	0.129576	7609	tags=62%, list=41%, signal=37%	5579/1378/718/9103/7043/3111/3676/7042/1917/1379/3684/3112/3593/1536/7099/3592/3117/3689/653361/3586/3118/7040/2214/3109/2212/3688/4689/2209/3716/3565/7097/3115/5600/3122/4688/3113/23118/3717/3119/3458/5743/7189/6772/3127/3725/6885
hsa04928	Parathyroid hormone synthesis, secretion and action	106	0.410656	1.2122	0.0434957	0.0434957	0.133024	8974	tags=66%, list=48%, signal=34%	111/108/5579/9365/4208/5745/6258/3708/2260/4325/5567/5582/596/5744/9935/5142/9586/1591/107/196883/10893/2625/23236/4326/84699/5330/3709/2770/4205/113/5144/846/114/64764/9247/115/860/8521/142680/8600/5332/5337/6569/11214/4209/1385/2768/1958/5141/56302/64386/673/10672/5578/10568/4323/109/1956/8074/9138/5568/5338/4040/2771/408/632/5594/1386/9826/50964
hsa00020	Citrate cycle (TCA cycle)	30	-0.338146	-1.78762	0.0454545	0.0454545	0.135356	6810	tags=93%, list=37%, signal=59%	4967/6391/48/50/47/5091/3419/1743/5162/1738/8801/4190/8803/1737/6392/1431/8802/5161/6389/3420/5160/5106/2271/3418/3417/3421/6390/4191
hsa00630	Glyoxylate and dicarboxylate metabolism	30	-0.268023	-1.41691	0.0454545	0.0454545	0.135356	13626	tags=100%, list=73%, signal=27%	112817/2752/2731/5095/84532/51179/847/38/4594/84693/48/189/81888/50/1738/4190/1431/6470/9380/2653/5096/125061/54363/132158/55902/283871/4191/39/6472
hsa04934	Cushing syndrome	155	0.392002	1.17793	0.0463954	0.0463954	0.136364	3679	tags=31%, list=20%, signal=25%	111/185/3776/108/3777/1583/7484/7482/8912/775/7483/3708/3739/1395/8913/5087/83439/5567/183/4158/816/7471/5443/815/6770/8911/1589/7480/7476/7475/779/51384/9586/8622/51176/107/8324/8322/196883/1586/23236/8325/1030/84699/5330/3709/2770/8321
hsa05416	Viral myocarditis	57	0.446549	1.26684	0.0472953	0.0472953	0.136417	7407	tags=58%, list=40%, signal=35%	6442/3908/1756/6444/6445/940/3111/959/3683/3112/857/3117/3689/941/2534/3118/958/942/3109/27/6443/3115/25/3122/3383/284217/3113/5551/3119/8672/5880/4625/3127
hsa00900	Terpenoid backbone biosynthesis	22	-0.355181	-1.56526	0.047619	0.047619	0.136417	7239	tags=91%, list=39%, signal=56%	2339/91734/23463/10269/38/79947/9453/57107/116150/2342/3157/10654/2224/3156/9986/3422/23590/4597/39/4598
hsa04960	Aldosterone-regulated sodium reabsorption	36	0.480954	1.31381	0.0492394	0.0492394	0.139296	5641	tags=47%, list=30%, signal=33%	477/3479/482/5579/480/5582/486/5293/6338/3667/4306/5295/5290/3758/6340/478/8503
									Table S7
