# Supplementary material for: Immune infiltration and prognosis in gastric cancer: role of NAD+ metabolism-related markers
Source: PeerJ. 2024 Jul 31;12:e17833. doi: 10.7717/peerj.17833 (PMC11297443; doi:10.7717/peerj.17833)
Supplement: Supplemental Information 9 — A total of 872 GO items were enriched. [file peerj-12-17833-s009.xlsx]

## Sheet: Sheet1
ONTOLOGY	ID	Description	setSize	enrichmentScore	NES	pvalue	p.adjust	qvalues	rank	leading_edge	core_enrichment
GO:0071162	CC	CMG complex	11	-0.951441	-2.92564	1e-10	1.98641e-08	1.62861e-08	932	tags=100%, list=5%, signal=95%	84296/4171/4175/4172/4176/8318/64785/9837/4173/51659
GO:0007156	BP	homophilic cell adhesion via plasma membrane adhesion molecules	167	0.642772	1.5513	1e-10	1.98641e-08	1.62861e-08	4679	tags=66%, list=25%, signal=51%	128434/28513/57863/56134/152404/11122/54798/26167/56135/56138/56137/5101/57453/6900/56139/83872/65217/56130/84623/64072/29930/54549/56145/91156/27328/56132/3897/56142/6092/84665/23363/1826/1008/5100/1825/57526/120114/152330/57575/64084/56136/1000/56143/56144/64405/56112/56147/56133/79633/56131/1007/5979/23705/7216/56100/5365/56101/56141/9499/60437/27255/1016/56146/54825/5098/9752/56125/1010/55714…
GO:0098936	CC	intrinsic component of postsynaptic membrane	123	0.646276	1.54186	1e-10	1.98641e-08	1.62861e-08	5376	tags=76%, list=28%, signal=55%	22871/4916/347730/22865/1272/27092/2903/2066/2045/6900/22986/2566/2556/729993/2894/6538/145581/2913/3736/57689/491/57502/2901/401190/1008/5100/1813/64084/148/1000/2561/150/388336/4986/2558/57497/5023/3746/1630/3356/1949/2890/4985/4988/94030/53826/114798/3751/2900/146395/1141/9890/59284/6531/8973/2895/1812/9127/107/2043/2915/3738/54413/6532/5802/57555/1742/3752/1144/347731/53616/6546/2550/9746/260…
GO:0099240	CC	intrinsic component of synaptic membrane	160	0.637244	1.53467	1e-10	1.98641e-08	1.62861e-08	5379	tags=72%, list=28%, signal=52%	1268/57863/22871/22854/4916/347730/22865/1272/2567/27092/2903/2066/2045/6900/22986/2566/2556/729993/2894/6538/2823/145581/8745/2913/3736/57689/491/57502/2901/401190/53942/1008/5100/1813/64084/148/1000/2561/150/388336/6326/4986/2558/57497/6506/5023/3746/1630/3356/1949/2890/4985/5789/4988/94030/53826/3737/3351/114798/3751/2900/27255/146395/492/1141/9890/59284/6531/8973/2895/1812/9127/107/2043/2915/…
GO:0035637	BP	multicellular organismal signaling	158	0.635422	1.5296	1e-10	1.98641e-08	1.62861e-08	4139	tags=58%, list=22%, signal=46%	6327/6332/477/10021/27092/845/11280/287/54112/6331/149461/7143/6330/55800/6547/6543/3736/5350/491/482/10345/6508/8911/6328/8913/2898/6329/4915/6910/23114/9096/7220/2852/1133/183/6326/4099/5023/781/29119/2257/6335/9992/9607/79191/6334/10060/3737/6323/3751/10242/492/1143/1816/59284/83700/8506/1812/3741/27094/1180/3757/8912/57731/58524/81033/783/6336/10699/30845/1901/2281/552/3670/775/3270/51738/551…
GO:0099699	CC	integral component of synaptic membrane	149	0.632171	1.51785	1e-10	1.98641e-08	1.62861e-08	5379	tags=72%, list=28%, signal=52%	1268/57863/22871/4916/347730/22865/2567/27092/2903/2066/2045/22986/2566/2556/729993/2894/6538/2823/145581/8745/2913/3736/57689/491/57502/2901/1008/5100/1813/64084/148/1000/2561/150/388336/6326/4986/2558/57497/6506/5023/3746/1630/3356/1949/2890/4985/5789/4988/94030/53826/3737/3351/114798/3751/2900/146395/492/1141/9890/59284/6531/8973/2895/1812/9127/107/2043/2915/3738/54413/6532/6336/5802/57555/502…
GO:0001508	BP	action potential	138	0.633959	1.51714	1e-10	1.98641e-08	1.62861e-08	4248	tags=54%, list=22%, signal=42%	1268/6327/6332/3745/477/10021/6869/11280/287/54112/6331/1269/149461/6330/55800/6543/3736/6508/8911/6328/8913/2898/6329/4915/9096/148/2852/6326/5023/781/29119/2257/6335/1137/1756/9992/2258/6334/3737/57369/6323/3751/10242/1141/1143/948/9472/8506/1812/3741/27094/1180/3757/8912/81033/783/6336/2281/775/6262/6640/23704/857/90134/3747/4923/6324/2316/3752/2741/6546/10052/610/859/3764
GO:0015081	MF	sodium ion transmembrane transporter activity	150	0.627234	1.50635	1e-10	1.98641e-08	1.62861e-08	4168	tags=57%, list=22%, signal=45%	6327/6332/55117/477/6528/10021/10568/11280/57030/6331/9058/389015/6330/60482/259232/55800/6547/6538/284111/6543/6512/2901/2899/8911/6328/8913/480/2898/6329/6338/6340/6555/9154/201780/6326/6506/479/6559/115584/57419/6335/6540/200010/160728/6334/8671/9153/6323/6511/2900/6530/6570/6557/64849/6531/348980/8912/55515/285195/6569/6554/6532/6336/54716/495/159963/125206/6571/10786/123041/25769/9963/57282/…
GO:0045211	CC	postsynaptic membrane	271	0.615278	1.5025	1e-10	1.98641e-08	1.62861e-08	5489	tags=68%, list=29%, signal=49%	22871/4593/4916/3745/347730/22865/1272/22866/2567/27092/2903/2066/2045/287/6900/2569/22986/2566/2556/729993/2894/6538/57528/2891/145581/2913/3736/57537/2743/1129/57689/491/57502/2901/2899/401190/1008/5100/2898/1813/64084/2917/148/3359/1000/2561/8001/2893/150/388336/440829/1133/1607/57692/4986/2558/57497/3778/55879/5023/3746/1630/57451/5913/3356/23237/1949/2890/9568/1740/4985/440073/4988/1137/1114…
GO:0007416	BP	synapse assembly	178	0.621496	1.50226	1e-10	1.98641e-08	1.62861e-08	4014	tags=56%, list=21%, signal=44%	22943/57633/26050/27445/22871/4593/4884/4916/26167/347730/22865/7476/2066/2045/119/9378/2566/2596/84189/56130/84623/2823/145581/577/23768/54549/91156/257194/26280/9379/56132/57502/23316/6092/53942/23363/1826/4915/575/23284/1813/64084/139065/1000/92737/2561/8128/1946/140689/266743/56133/6622/55203/56131/5789/11141/94030/84631/9423/2258/375323/4914/43/5020/114798/158038/2554/79953/1141/10082/2895/1…
GO:0034703	CC	cation channel complex	221	0.614554	1.49384	1e-10	1.98641e-08	1.62861e-08	4756	tags=62%, list=25%, signal=47%	6327/6332/57628/3745/774/170850/3787/10021/27092/2903/3755/845/11280/6331/3776/6330/59285/1804/55800/30820/729993/2891/3773/3736/6261/785/2901/3788/2899/285175/8911/6328/8913/2898/6329/54714/375567/6338/56479/6340/1258/3359/3739/9312/7220/2893/388336/440829/6326/1261/3778/219527/3746/257062/781/2890/779/27012/6335/286097/9992/3763/30818/6334/10060/3737/3780/168507/6833/3756/55799/170572/6323/3751…
GO:0097060	CC	synaptic membrane	372	0.60484	1.48678	1e-10	1.98641e-08	1.62861e-08	5489	tags=63%, list=29%, signal=46%	1268/140730/9892/57863/22871/4593/440279/22854/4916/3745/347730/22865/1272/22866/2567/27092/2903/2066/22999/2045/85445/287/6900/2569/22986/9378/2566/2556/729993/2894/6538/57528/2891/2823/145581/8745/2913/9699/8516/3736/57537/2743/1129/57689/491/9627/57502/2901/2899/401190/6616/53942/1008/5100/2898/1813/64084/2917/148/3359/2572/1000/2561/8001/2893/150/388336/440829/2852/1133/1607/6857/6326/57692/4…
GO:0098742	BP	cell-cell adhesion via plasma-membrane adhesion molecules	277	0.60782	1.48504	1e-10	1.98641e-08	1.62861e-08	4712	tags=58%, list=25%, signal=45%	9071/128434/335/28513/9370/57863/22871/56134/152404/9074/22854/11122/54798/26167/5010/22865/56135/56138/56137/5101/57453/10178/6403/6900/56139/83872/149461/653499/65217/56130/84623/145581/64072/29930/54549/56145/57689/91156/27328/56132/3897/56142/140628/137970/6092/84665/23363/51208/1826/1008/5100/1825/23284/57526/120114/152330/57575/64084/56136/1000/56143/1946/56144/64405/4099/56112/56147/56133/…
GO:0034702	CC	ion channel complex	293	0.603543	1.47574	1e-10	1.98641e-08	1.62861e-08	5720	tags=67%, list=30%, signal=48%	6327/6332/57628/3745/774/170850/3787/10021/2567/27092/2903/3755/845/11280/2569/2566/6331/2556/3776/6330/59285/1804/55800/30820/729993/1188/2891/3773/3736/2743/6261/785/2901/3788/2899/285175/8911/6328/8913/2898/6329/54714/375567/6338/56479/6340/1258/3359/3739/9312/2561/7220/8001/2893/388336/1187/440829/6326/2558/1261/3778/55879/219527/3746/257062/781/2890/779/27012/6335/1137/286097/9992/3763/30818…
GO:1902495	CC	transmembrane transporter complex	365	0.591185	1.45312	1e-10	1.98641e-08	1.62861e-08	5720	tags=58%, list=30%, signal=41%	6327/6332/57628/3745/774/170850/3787/477/10021/2567/27092/2903/486/3755/845/11280/2569/2566/6331/2556/3776/6330/59285/1804/55800/30820/729993/1188/2891/3773/3736/2743/5350/482/6261/785/2901/3788/2899/285175/8911/6328/8913/64241/480/2898/6329/54714/375567/5348/6338/56479/6340/1258/3359/3739/9312/2561/7220/8001/2893/388336/1187/440829/6326/2558/1261/3778/55879/219527/3746/257062/479/781/2890/779/27…
GO:0042391	BP	regulation of membrane potential	415	0.588838	1.44945	1e-10	1.98641e-08	1.62861e-08	4932	tags=52%, list=26%, signal=40%	1268/140730/6327/6332/22871/152404/5649/8115/3745/477/10021/6869/2567/2903/7476/4653/1811/22999/845/340273/11280/287/2569/9378/2566/54112/88/6331/1269/3777/2556/149461/3776/6330/259232/55800/6547/2894/9699/6543/3736/2743/5350/56853/482/10345/6508/22953/57502/2901/2899/388135/401190/8911/6328/60598/23316/8913/480/2898/6329/4915/5348/64208/6910/1813/2273/1258/9096/148/3359/27133/2561/8001/23542/285…
GO:0022836	MF	gated channel activity	338	0.590379	1.44905	1e-10	1.98641e-08	1.62861e-08	5720	tags=67%, list=30%, signal=48%	1268/6327/6332/203859/3745/774/27112/170850/3787/10021/2567/27092/2903/3755/11280/63982/2569/343450/2566/6331/3777/2556/3776/6330/259232/59285/55800/30820/2894/1188/1179/2891/3773/3736/2743/6261/785/22953/2901/3788/2899/8911/6616/6328/8913/2898/6329/54714/6338/56479/6340/1258/3359/3739/9312/27133/2561/79054/8001/2893/1187/6326/55283/2558/1261/23416/3778/55879/219527/5023/3746/781/131096/80036/289…
GO:0062023	CC	collagen-containing extracellular matrix	427	0.585622	1.44159	1e-10	1.98641e-08	1.62861e-08	4788	tags=57%, list=25%, signal=44%	341640/335/337/4969/5104/9370/22854/6422/1311/5549/7060/1511/4653/26033/8483/7044/1310/2255/2662/23671/4148/7448/1286/12/2267/345/2192/63923/7148/22915/4958/1285/9068/1359/4239/2266/25890/83872/2006/64499/84570/127435/7143/1287/51435/8076/5803/197/2719/1191/2147/10418/7177/84467/1288/11095/2202/1991/90187/1215/6423/3697/3897/84171/1280/80070/80144/8406/5212/4693/10216/253935/10218/158326/375567/4…
GO:1990351	CC	transporter complex	387	0.580671	1.42735	1e-10	1.98641e-08	1.62861e-08	5720	tags=55%, list=30%, signal=39%	6327/6332/57628/3745/774/170850/3787/477/10021/2567/27092/2903/486/3755/845/11280/2569/2566/6331/2556/3776/6330/59285/1804/55800/30820/729993/1188/2891/3773/3736/2743/5350/482/6261/785/2901/3788/2899/285175/8911/6328/8913/64241/480/2898/6329/54714/375567/5348/6338/56479/6340/1258/3359/3739/9312/2561/7220/8001/2893/388336/1187/440829/6326/2558/1261/3778/55879/219527/3746/257062/479/781/2890/779/27…
GO:0005216	MF	ion channel activity	436	0.574533	1.41489	1e-10	1.98641e-08	1.62861e-08	5720	tags=61%, list=30%, signal=44%	1268/6327/6332/203859/3745/774/27112/170850/3787/10021/2567/27092/2903/114780/3755/11280/63982/2569/343450/2566/6331/347741/3777/2556/3776/6330/259232/59285/55800/30820/79400/2894/1188/1179/2891/3773/2823/3736/2743/6261/785/22953/2901/3788/2899/285175/8911/6616/6328/60598/115111/8913/2898/6329/54714/5348/6338/56479/6340/1258/3359/3739/9312/27133/2561/79054/7220/8001/2893/1187/6326/55283/2558/1261…
GO:0005261	MF	cation channel activity	339	0.57531	1.41202	1e-10	1.98641e-08	1.62861e-08	5720	tags=63%, list=30%, signal=45%	1268/6327/6332/3745/774/27112/170850/3787/10021/27092/2903/114780/3755/11280/343450/6331/347741/3777/3776/6330/259232/59285/55800/30820/79400/2891/3773/2823/3736/6261/785/22953/2901/3788/2899/285175/8911/6616/6328/60598/8913/2898/6329/54714/6338/56479/6340/1258/3359/3739/9312/27133/79054/7220/2893/6326/55283/1261/23416/3778/219527/5023/3746/781/131096/80036/57419/2890/779/27012/6335/4988/1137/140…
GO:0098978	CC	glutamatergic synapse	319	0.575416	1.41052	1e-10	1.98641e-08	1.62861e-08	5025	tags=48%, list=27%, signal=36%	1268/27445/22871/4884/22854/4916/9211/22866/27092/2903/7476/2066/2045/6854/5063/2569/22986/2566/8224/6456/6860/7143/6457/729993/2894/2823/145581/9228/8745/50632/23467/10718/2913/3736/57689/491/26280/10810/57502/2901/2899/401190/6616/9229/1008/5100/2898/9455/23284/1813/64084/139065/148/150/388336/6857/6326/5340/6506/5023/7781/26059/3356/23237/1949/5217/2890/5577/5789/9900/11141/94030/84631/53826/8…
GO:0007188	BP	adenylate cyclase-modulating G protein-coupled receptor signaling pathway	241	0.577806	1.4079	1e-10	1.98641e-08	1.62861e-08	6510	tags=71%, list=34%, signal=47%	1268/4886/768239/111/6344/2740/1113/7434/117/4883/5746/283383/9340/5731/116/23566/1269/5064/7432/155/1395/5733/2913/6954/9699/846/2695/108/577/1129/5350/2775/554/5745/2899/4161/799/575/23284/1813/9590/2587/2917/148/150/2852/1133/2861/4986/2914/114131/2849/154/9568/1394/4985/10149/4988/2642/5138/3351/1902/3360/146/23266/5744/553/27201/118442/2835/64805/1132/4158/1816/576/2774/5737/1812/2770/2916/1…
GO:0050804	BP	modulation of chemical synaptic transmission	413	0.570734	1.4049	1e-10	1.98641e-08	1.62861e-08	4699	tags=49%, list=25%, signal=37%	1268/22943/140730/9370/22871/152404/5649/440279/10590/6344/4884/22854/3745/347730/774/9211/477/6869/27092/2903/7476/22999/85445/590/6623/6900/22986/9378/8224/1269/23349/55607/6860/7143/6547/729993/2894/9228/23467/10718/1395/2913/9699/2695/6543/57537/57689/9145/56853/9627/57502/2901/57338/2899/6616/816/23316/9229/2898/4915/575/1813/84502/152330/64084/9590/3815/4920/2917/148/1000/11170/4909/150/388…
GO:0099177	BP	regulation of trans-synaptic signaling	414	0.570467	1.40428	1e-10	1.98641e-08	1.62861e-08	4699	tags=49%, list=25%, signal=37%	1268/22943/140730/9370/22871/152404/5649/440279/10590/6344/4884/22854/3745/347730/774/9211/477/6869/27092/2903/7476/22999/85445/590/6623/6900/22986/9378/8224/1269/23349/55607/6860/7143/6547/729993/2894/9228/23467/10718/1395/2913/9699/2695/6543/57537/57689/9145/56853/9627/57502/2901/57338/2899/6616/816/23316/9229/2898/4915/575/1813/84502/152330/64084/9590/3815/4920/2917/148/1000/11170/4909/150/388…
GO:0022803	MF	passive transmembrane transporter activity	483	0.568459	1.40274	1e-10	1.98641e-08	1.62861e-08	5720	tags=60%, list=30%, signal=43%	1268/6327/6332/203859/3745/774/27112/170850/3787/10021/2567/27092/2903/114780/3755/362/11280/63982/2569/343450/2566/6331/347741/3777/2556/3776/6330/259232/59285/55800/30820/79400/2894/1188/89872/1179/2891/3773/2823/3736/2743/6261/785/22953/2901/3788/2899/285175/8911/6616/6328/60598/115111/8913/2898/6329/54714/5348/6338/10804/56479/6340/361/56666/1258/3359/3739/9312/27133/2561/79054/7220/8001/2893…
GO:0050808	BP	synapse organization	415	0.569321	1.40141	1e-10	1.98641e-08	1.62861e-08	5324	tags=51%, list=28%, signal=38%	1501/22943/57633/547/26050/27445/22871/5649/4593/9723/440279/4884/22854/4916/26167/347730/22865/22866/7476/2066/2045/119/6623/6900/5063/9378/2566/2596/158866/5064/7143/4747/1287/84189/6547/56130/84623/2823/145581/4009/6543/577/23768/2743/54549/57689/91156/257194/26280/9379/56132/3897/10810/785/22953/57502/816/23316/6092/53942/23363/1826/5100/4915/575/23284/1813/23114/64084/139065/1000/92737/9118/…
GO:0015267	MF	channel activity	482	0.567974	1.40134	1e-10	1.98641e-08	1.62861e-08	5720	tags=60%, list=30%, signal=43%	1268/6327/6332/203859/3745/774/27112/170850/3787/10021/2567/27092/2903/114780/3755/362/11280/63982/2569/343450/2566/6331/347741/3777/2556/3776/6330/259232/59285/55800/30820/79400/2894/1188/89872/1179/2891/3773/2823/3736/2743/6261/785/22953/2901/3788/2899/285175/8911/6616/6328/60598/115111/8913/2898/6329/54714/5348/6338/10804/56479/6340/361/56666/1258/3359/3739/9312/27133/2561/79054/7220/8001/2893…
GO:0098793	CC	presynapse	491	0.565558	1.39599	1e-10	1.98641e-08	1.62861e-08	4166	tags=42%, list=22%, signal=33%	1268/140730/9892/27445/57863/22871/440279/10590/22854/115827/1272/2903/7476/2066/5179/22999/85445/6623/63923/203190/6854/57030/9378/8224/6456/3776/6860/4747/246213/6572/6457/6547/84623/6538/57528/2823/284612/8745/1395/2913/9699/846/6543/3736/491/9145/6512/9379/9899/4852/9627/57502/2901/6861/2899/401190/6616/55530/53942/143425/1008/5100/2898/4915/24141/1813/2917/148/2572/29993/1000/114088/4909/229…
GO:0046873	MF	metal ion transmembrane transporter activity	425	0.564292	1.38921	1e-10	1.98641e-08	1.62861e-08	4866	tags=52%, list=26%, signal=40%	1268/6327/6332/3745/774/55532/27112/55117/170850/3787/169026/477/6528/10021/27092/2903/10568/114780/3755/11280/57030/343450/348938/6331/3777/9058/389015/3776/6330/60482/259232/59285/55800/6547/30820/6538/284111/3773/2823/6543/3736/491/6512/6261/785/2901/3788/2899/8911/6616/6328/60598/8913/480/2898/6329/6338/56479/6340/6555/9154/201780/3739/9312/27133/79054/7220/6326/55283/23416/3778/6506/219527/3…
GO:0014069	CC	postsynaptic density	317	0.563031	1.37998	1e-10	1.98641e-08	1.62861e-08	4932	tags=46%, list=26%, signal=34%	1501/27445/22871/152404/4804/22865/22866/27092/2903/2066/2045/4842/119/6854/5063/22986/2596/8224/158866/5064/55607/64506/6457/6547/729993/2894/2891/145581/9228/56899/2913/6543/8516/57537/57689/491/9201/57502/2901/388135/401190/9229/2898/9455/4915/575/1813/64084/1000/150/388336/23542/440829/2852/57497/1630/23237/1949/2890/1740/4985/440073/94030/9863/4744/23705/8777/3756/1821/23426/84435/50944/1147…
GO:0098984	CC	neuron to neuron synapse	346	0.562156	1.37984	1e-10	1.98641e-08	1.62861e-08	4701	tags=45%, list=25%, signal=35%	1501/27445/22871/152404/4804/22865/22866/27092/2903/2066/5179/2045/4842/119/6854/5063/22986/2596/8224/158866/5064/55607/64506/6457/6547/729993/2894/2891/145581/9228/56899/2913/6543/8516/57537/57689/491/9201/482/57502/2901/388135/401190/9229/143425/2898/9455/4915/575/1813/64084/2917/1000/150/388336/23542/440829/2852/6857/57497/7781/1630/23237/1949/2890/1740/4985/5789/440073/94030/9863/4744/23705/8…
GO:0032279	CC	asymmetric synapse	322	0.561683	1.37658	1e-10	1.98641e-08	1.62861e-08	4932	tags=46%, list=26%, signal=34%	1501/27445/22871/152404/4804/22865/22866/27092/2903/2066/2045/4842/119/6854/5063/22986/2596/8224/158866/5064/55607/64506/6457/6547/729993/2894/2891/145581/9228/56899/2913/6543/8516/57537/57689/491/9201/57502/2901/388135/401190/9229/2898/9455/4915/575/1813/64084/2917/1000/150/388336/23542/440829/2852/57497/1630/23237/1949/2890/1740/4985/440073/94030/9863/4744/23705/8777/3756/1821/23426/84435/50944…
GO:0006936	BP	muscle contraction	337	0.560025	1.37454	1e-10	1.98641e-08	1.62861e-08	6010	tags=59%, list=32%, signal=41%	6327/6332/1113/1311/4604/477/10021/6869/1837/1674/4842/845/4629/287/88/6331/4634/6330/55800/6547/6442/5733/3736/1129/25802/5350/93649/7140/6261/10345/84676/2775/22953/7111/8913/6329/844/5348/6338/7134/1813/80763/3815/8736/1264/148/9312/322/150/2852/183/23336/3778/2593/4619/5023/4606/26287/781/3356/154/779/29119/2257/8735/1756/9992/3768/4620/6444/51761/2258/5020/89/6323/8082/4626/56923/4638/1410/9…
GO:0043025	CC	neuronal cell body	480	0.556436	1.37264	1e-10	1.98641e-08	1.62861e-08	4153	tags=41%, list=22%, signal=33%	1501/460/5563/2674/347/338/6750/3249/10642/11075/4804/3745/79608/774/57565/477/22866/6863/5126/5179/2045/3623/56896/6623/63923/116/6900/339479/9378/2596/1586/1269/3776/6860/7432/55273/2690/60482/246213/6547/2891/933/2823/79739/846/2695/6543/8516/3736/7345/57537/140767/491/257194/3897/4852/9627/10382/22953/2901/6861/2899/401190/1620/3798/5630/1826/2898/1813/9590/4856/4920/92737/9312/5136/8001/2893…
GO:0099572	CC	postsynaptic specialization	340	0.559205	1.37248	1e-10	1.98641e-08	1.62861e-08	4701	tags=45%, list=25%, signal=34%	1501/27445/22871/152404/4804/347730/22865/22866/27092/2903/2066/2045/4842/119/6854/5063/22986/2566/2596/8224/2556/158866/5064/55607/64506/6457/6547/729993/2894/2891/145581/9228/56899/2913/6543/8516/57537/57689/491/9201/57502/2901/388135/401190/9229/1008/2898/9455/4915/575/1813/64084/1000/2561/150/388336/23542/440829/2852/2558/57497/1630/5913/23237/1949/2890/1740/4985/440073/94030/9863/4744/23705/…
GO:0034765	BP	regulation of ion transmembrane transport	454	0.544288	1.34212	1e-10	1.98641e-08	1.62861e-08	5803	tags=55%, list=31%, signal=39%	6327/6332/22871/5649/5354/57628/3745/774/170850/3787/477/27092/486/4842/3755/845/11280/287/88/6331/6330/259232/59285/1804/55800/30820/2147/729993/1188/3773/3736/5350/9104/482/10345/785/3788/57338/8911/6328/60598/8913/6000/799/6329/844/5348/57158/1813/56479/84502/2273/3739/9312/27133/2259/7220/150/388336/23542/1187/440829/2852/183/6326/4986/23416/644139/3778/219527/5023/3746/781/23237/6622/131096/…
GO:0003012	BP	muscle system process	418	0.540428	1.33018	1e-10	1.98641e-08	1.62861e-08	6010	tags=55%, list=32%, signal=38%	6327/6332/1113/1311/4604/477/10021/6869/1837/4653/1674/3479/221476/4842/845/4629/287/88/6331/4634/6330/28999/55800/6547/6442/5733/3736/1129/25802/5350/93649/7140/6261/10345/84676/2775/22953/7111/140628/816/8913/6329/844/5348/6338/9464/7134/1813/80763/3815/8736/1264/148/9312/322/150/2852/183/23336/3778/5152/2593/4619/5023/4606/26287/781/3356/154/779/29119/2257/8735/1756/9992/3768/4620/6444/51761/2…
GO:0008015	BP	blood circulation	492	0.534835	1.32017	1e-10	1.98641e-08	1.62861e-08	5033	tags=49%, list=27%, signal=37%	1268/4886/9370/6327/2740/1113/1311/477/10021/185/6869/1511/1674/4842/4883/845/287/1285/4223/367/1359/6331/2266/9353/2006/6456/4634/27129/6330/155/55800/6547/2837/29953/846/6543/1129/5350/491/1215/6445/482/121643/10345/554/4852/6508/22953/8913/5348/6338/10391/7134/6910/1813/9590/80763/9096/148/7220/150/2852/290/183/2153/3827/3778/9365/5023/206338/781/3356/4018/154/11149/1579/7068/29119/654/342527/…
GO:0099055	CC	integral component of postsynaptic membrane	118	0.643618	1.53421	1.18543e-10	2.29587e-08	1.88233e-08	5376	tags=75%, list=28%, signal=54%	22871/4916/347730/22865/27092/2903/2066/2045/22986/2566/2556/729993/2894/6538/145581/2913/3736/57689/491/57502/2901/1008/5100/1813/64084/148/1000/2561/150/388336/4986/2558/57497/5023/3746/1630/3356/1949/2890/4985/4988/94030/53826/114798/3751/2900/146395/1141/9890/59284/6531/8973/2895/1812/9127/107/2043/2915/3738/54413/6532/5802/57555/3752/1144/347731/53616/6546/2550/9746/26045/27091/10368/729956/…
GO:0061564	BP	axon development	473	0.526027	1.29754	1.59689e-10	3.01734e-08	2.47384e-08	5325	tags=46%, list=28%, signal=34%	1268/128434/347/337/2348/26050/5649/9723/5354/2676/4884/22854/223117/4804/22865/9211/1272/7476/2045/57453/56896/63923/55118/151449/23105/23566/6900/5063/9378/2596/8153/285220/9353/56963/91653/7143/4747/84189/5803/494470/4009/1382/7345/23768/9241/57689/9201/3897/886/658/57611/137970/6092/84665/140578/53942/3798/1826/4135/4915/575/1813/23114/152330/139065/6608/2917/1000/322/10752/91584/1946/146760/…
GO:0043235	CC	receptor complex	406	0.533785	1.31326	1.8712e-10	3.45146e-08	2.82977e-08	5831	tags=55%, list=31%, signal=39%	1380/7018/2674/55600/26050/22871/4593/5354/2676/4916/2567/27092/2903/9971/2066/117/2045/374462/84059/2569/2566/285220/2556/1271/2690/155/729993/57528/2891/53353/8516/269/3977/5745/658/84171/22953/2901/2899/799/2675/973/64241/2898/3358/4915/375567/3815/4920/2917/3359/2561/7220/2893/150/388336/4036/91584/2322/440829/6098/3568/2861/2558/9358/55879/3356/165829/2890/154/9568/5979/238/1137/2843/5156/92…
GO:0031261	CC	DNA replication preinitiation complex	12	-0.910074	-3.05789	2.38506e-10	4.29699e-08	3.523e-08	932	tags=92%, list=5%, signal=87%	4174/84296/4171/4175/4172/4176/8318/64785/9837/4173/51659
GO:0043204	CC	perikaryon	153	0.610631	1.46807	2.73698e-10	4.81895e-08	3.95094e-08	4153	tags=52%, list=22%, signal=41%	1501/460/4804/3745/5126/5179/116/2596/1269/7432/55273/60482/246213/6547/79739/6543/8516/3736/57537/4852/2901/2899/401190/3798/5630/2898/1813/9312/8001/146760/346288/4986/1261/5152/1740/4988/50940/5122/5957/3737/4692/9362/3756/1821/23426/120892/3751/1410/1996/553/1393/7732/10439/58157/85397/85442/2043/9148/94233/57165/1400/5802/4131/23208/57463/5798/775/3748/57282/10814/3747/4923/6324/2316/2741/12…
GO:0055074	BP	calcium ion homeostasis	459	0.522188	1.28776	2.97326e-10	5.11864e-08	4.19665e-08	6524	tags=55%, list=34%, signal=37%	1268/887/111/10590/2740/79608/774/27112/477/185/6869/6863/931/2903/117/4842/6366/845/6363/5731/116/287/5314/23566/3777/6547/2147/284612/64072/5733/846/1991/6543/5350/491/9104/84239/6261/10345/5745/22953/57338/799/643/2898/3358/844/57158/1813/84502/2587/148/79054/7220/2852/183/55283/3827/9365/2247/5023/525/781/2840/3356/6622/57419/2890/779/9900/286097/5587/2843/1238/1756/5156/6358/6444/3351/2814/1…
GO:0042734	CC	presynaptic membrane	142	0.626661	1.50152	3.68211e-10	6.20115e-08	5.08418e-08	3614	tags=53%, list=19%, signal=43%	1268/9892/57863/440279/22854/1272/2903/2066/22999/85445/9378/6538/57528/2823/8745/2913/9699/3736/491/9627/2901/2899/401190/6616/53942/1008/5100/2898/1813/148/2572/1000/150/2852/6857/6326/4986/2558/6506/5023/3746/26059/3356/1949/4985/5789/4988/94030/53826/5138/3737/3351/3756/2900/386617/27255/6530/492/1141/6531/8973/8506/1812/2043/320/3738/6532/6336/9381/23208/57555/5028/3748/23025/3747
GO:0006814	BP	sodium ion transport	243	0.567023	1.38128	4.0763e-10	6.71896e-08	5.50872e-08	4866	tags=51%, list=26%, signal=38%	6327/6332/55117/477/6528/10021/1272/5446/486/4842/10568/11280/57030/6331/55089/9058/389015/6330/60482/259232/246213/55800/6547/6538/284111/286183/6543/482/8911/6328/8913/154215/480/6329/5348/6338/1813/6340/6555/201780/2259/79570/6326/128414/340024/525/479/6559/115584/57419/154/2257/6335/6540/1756/28968/53826/200010/160728/2258/6334/10991/8671/130497/65267/6323/23072/6530/53822/6557/1910/5270/2624…
GO:0001505	BP	regulation of neurotransmitter levels	210	0.578749	1.40453	4.5512e-10	7.34544e-08	6.02235e-08	3708	tags=43%, list=20%, signal=35%	1268/140730/27445/22871/440279/145270/477/7476/22999/4842/590/6623/6854/9378/8224/5053/6860/60482/6538/9699/26002/6512/9379/9627/2901/6861/6616/143425/1813/148/2572/150/5865/2852/6857/6506/5023/4129/2914/26059/3356/6622/5217/9900/6540/222962/5153/3351/43/8618/22895/120892/6511/6530/8448/6570/6853/2670/1143/6581/6531/8973/2668/1812/107/91683/320/6532/783/84446/9381/5579/5413/1136/23208/5582/6571/8…
GO:0008528	MF	G protein-coupled peptide receptor activity	144	0.611328	1.46665	4.8678e-10	7.69608e-08	6.30983e-08	4880	tags=65%, list=26%, signal=48%	4886/887/114815/6344/2740/7434/185/6869/117/4883/5746/9340/10886/22986/2837/1395/57537/886/554/5745/2862/4161/799/643/2587/2861/4986/2840/4889/1394/4985/4988/1238/2642/84539/56923/553/64106/4881/1910/4158/1236/10888/1233/6753/3061/2834/2692/10316/84634/1524/59350/2492/10800/6870/552/10267/7253/2826/186/9002/5021/122042/7852/680/84109/51083/6865/1235/3973/4923/2854/4987/4829/2925/10266/4887/2829/4…
GO:0008201	MF	heparin binding	167	0.600913	1.45027	6.29249e-10	9.74958e-08	7.99345e-08	5046	tags=60%, list=27%, signal=44%	64388/338/5104/6422/1311/5549/7060/4057/1511/2255/340419/7448/26577/79625/7148/10178/6403/284654/8839/343637/9353/84570/4745/2147/11095/1991/84870/4856/2252/151887/146760/2160/64093/3827/2247/4018/350/6586/4753/51156/149998/7123/4353/2260/5270/2254/64094/4053/3990/333/64100/9510/462/6402/4023/6585/5802/83998/8838/50939/5196/9508/1842/3273/5764/129804/6649/8292/2200/3075/655/30008/170689/3053/3491…
GO:0007409	BP	axonogenesis	428	0.525361	1.29331	6.45079e-10	9.79887e-08	8.03386e-08	5325	tags=46%, list=28%, signal=34%	128434/26050/5649/9723/2676/4884/22854/223117/4804/22865/9211/1272/7476/2045/57453/56896/63923/151449/23105/23566/6900/5063/9378/2596/8153/285220/9353/91653/7143/4747/84189/5803/494470/4009/1382/7345/23768/9241/57689/9201/3897/886/658/57611/137970/6092/84665/140578/53942/3798/1826/4135/4915/575/1813/23114/152330/139065/6608/1000/322/10752/91584/1946/25806/4099/9369/4137/3908/1630/10090/1749/1949/…
GO:0006836	BP	neurotransmitter transport	206	0.581963	1.41182	7.16314e-10	1.05035e-07	8.61161e-08	3708	tags=44%, list=20%, signal=36%	1268/140730/27445/22871/440279/55117/477/7476/22999/4842/6623/6854/57030/9378/8224/6860/60482/246213/6572/6538/9699/6512/9379/9899/9627/2901/6861/6616/143425/1813/148/22987/150/5865/2852/6857/6506/55879/5023/2914/26059/3356/6622/5217/9900/6540/28968/222962/3351/9153/8618/22895/120892/6511/6530/8448/6570/6853/2670/1143/6581/6531/8973/2668/1812/107/91683/320/6532/783/84446/9381/5579/5413/1136/23208…
GO:0005244	MF	voltage-gated ion channel activity	199	0.5866	1.42228	7.32144e-10	1.05035e-07	8.61161e-08	4706	tags=59%, list=25%, signal=45%	1268/6327/6332/3745/774/170850/3787/10021/27092/2903/3755/11280/343450/6331/3777/3776/6330/259232/59285/55800/30820/1188/3773/3736/6261/785/3788/8911/6616/6328/8913/6329/56479/3739/9312/27133/1187/6326/23416/3778/219527/3746/781/131096/779/27012/6335/4988/9992/3768/3763/30818/6334/10060/3737/3351/3780/6833/3756/89822/55799/6323/3751/3754/54102/9254/3750/773/59284/786/3741/1180/348980/777/3757/126…
GO:0022832	MF	voltage-gated channel activity	199	0.5866	1.42228	7.32144e-10	1.05035e-07	8.61161e-08	4706	tags=59%, list=25%, signal=45%	1268/6327/6332/3745/774/170850/3787/10021/27092/2903/3755/11280/343450/6331/3777/3776/6330/259232/59285/55800/30820/1188/3773/3736/6261/785/3788/8911/6616/6328/8913/6329/56479/3739/9312/27133/1187/6326/23416/3778/219527/3746/781/131096/779/27012/6335/4988/9992/3768/3763/30818/6334/10060/3737/3351/3780/6833/3756/89822/55799/6323/3751/3754/54102/9254/3750/773/59284/786/3741/1180/348980/777/3757/126…
GO:0001653	MF	peptide receptor activity	150	0.60894	1.46241	8.67011e-10	1.22122e-07	1.00125e-07	5443	tags=68%, list=29%, signal=49%	4886/887/114815/6344/2740/7434/185/6869/117/4883/5746/9340/10886/22986/2837/1395/57537/886/554/5745/2862/4161/799/643/2587/2861/4986/2840/4889/1394/4985/4988/1238/2642/84539/3000/56923/553/64106/4881/1910/4158/1236/10888/1233/6753/3061/2834/2692/10316/84634/1524/59350/2492/10800/6870/552/10267/7253/2826/186/9002/5021/122042/7852/680/84109/51083/6865/1235/3973/4923/2854/4987/4829/2925/10266/4887/2…
GO:0006813	BP	potassium ion transport	233	0.568298	1.38297	1.2488e-09	1.72759e-07	1.41641e-07	4856	tags=53%, list=26%, signal=40%	3249/57628/3745/170850/3787/477/10021/486/4842/3755/845/287/343450/88/3777/389015/3776/7432/259232/1804/30820/3773/3736/482/3788/6616/60598/6000/480/5348/1813/56479/2273/3739/9312/27133/150/2645/4986/23416/3778/219527/3746/479/3356/6559/131096/57419/27012/9992/3768/3763/30818/10060/3737/3780/6833/3756/65267/89822/3751/3754/10242/3750/6557/9472/1812/3741/27094/348980/3779/3757/126755/285195/3738/1…
GO:0006271	BP	DNA strand elongation involved in DNA replication	15	-0.842285	-3.19851	1.57158e-09	2.13597e-07	1.75123e-07	1361	tags=80%, list=7%, signal=74%	5425/5984/5422/3978/54107/1763/4172/4176/9837/5983/4173/5111
GO:0006874	BP	cellular calcium ion homeostasis	447	0.520387	1.28258	1.9664e-09	2.62649e-07	2.1534e-07	6524	tags=55%, list=34%, signal=37%	1268/887/111/10590/2740/79608/774/27112/477/185/6869/6863/931/2903/117/4842/6366/845/6363/5731/116/287/5314/23566/3777/6547/2147/284612/64072/5733/846/1991/6543/5350/491/9104/84239/6261/10345/5745/22953/57338/799/643/2898/3358/844/57158/1813/84502/2587/148/79054/7220/2852/183/55283/3827/2247/5023/781/2840/3356/6622/57419/2890/779/9900/286097/5587/2843/1238/1756/5156/6358/3351/2814/1902/2099/5020/…
GO:0007626	BP	locomotory behavior	192	0.579892	1.40479	2.95757e-09	3.88344e-07	3.18394e-07	4046	tags=46%, list=21%, signal=36%	460/4886/5649/111/347730/477/1272/5179/7545/6623/6900/54112/7143/84189/57144/64072/4009/2695/7345/2743/257194/7111/6616/340990/1826/3358/1813/4909/10752/55283/2861/4986/6622/1949/4985/2257/238/80243/124925/2019/27306/5153/9099/1600/220/6323/120892/3751/51168/1996/1141/1143/6414/6531/10882/2668/1812/2916/55084/2043/3084/2915/57731/320/3236/163175/58524/5309/6886/2911/1136/7200/6387/4211/6571/57555…
GO:1903522	BP	regulation of blood circulation	246	0.562419	1.37012	3.02152e-09	3.90128e-07	3.19857e-07	5033	tags=55%, list=27%, signal=41%	6327/2740/1113/477/10021/185/6869/1674/4842/845/287/6331/2266/4634/27129/6330/55800/6547/846/6543/1129/5350/491/482/121643/10345/554/6508/8913/5348/6910/1813/80763/9096/148/7220/150/183/5023/781/3356/11149/7068/29119/342527/1756/9992/3768/79191/2258/10060/2243/5020/146/553/6271/10242/3952/492/1910/84525/2946/3741/2244/100506013/3757/8912/57731/152/147/81033/796/783/6336/6474/4313/10699/30845/1080…
GO:0051480	BP	regulation of cytosolic calcium ion concentration	347	0.532582	1.30732	3.11744e-09	3.95914e-07	3.24601e-07	5904	tags=56%, list=31%, signal=39%	1268/887/111/10590/2740/79608/774/27112/477/185/6869/6863/931/2903/117/4842/6366/845/6363/5731/116/287/23566/3777/6547/2147/64072/5733/6543/5350/491/6261/10345/22953/57338/799/643/3358/844/57158/1813/84502/2587/148/7220/2852/183/55283/3827/2247/5023/781/2840/3356/6622/2890/779/5587/2843/1238/1756/5156/3351/2814/1902/2099/5020/146/56923/553/930/492/773/1910/948/9472/1236/162514/6263/5737/1812/2946…
GO:0060078	BP	regulation of postsynaptic membrane potential	130	0.614621	1.46767	3.24533e-09	4.05509e-07	3.32467e-07	6169	tags=75%, list=33%, signal=51%	22871/152404/5649/2567/2903/7476/22999/2569/9378/2566/2556/6547/2894/9699/6543/3736/2743/56853/22953/57502/2901/2899/388135/401190/23316/2898/1813/2561/8001/23542/2558/5023/266743/6622/2890/154/4988/1137/124925/50944/120892/3751/2900/2554/4355/1141/66000/1143/2892/8973/2895/84866/9127/2915/54413/2911/1136/869/2564/2565/5999/4208/57555/1742/51738/1142/4923/2741/1145/1144/642938/2550/2897/81832/255…
GO:0010817	BP	regulation of hormone levels	491	0.513472	1.26742	3.50238e-09	4.30681e-07	3.53105e-07	6005	tags=47%, list=32%, signal=33%	83539/125/1268/9370/27445/3249/111/9227/27344/640/6422/3745/1113/8854/2850/169026/7276/6528/185/6869/1381/5126/9971/1511/1583/3623/590/222546/5950/116/126/1586/1359/2266/7432/1545/2690/64377/10720/114571/9699/846/1559/2695/1735/1382/127/1215/1646/1363/886/174/6616/143425/124/3358/7173/6338/54097/1813/4856/2587/339761/2922/2304/25924/150/2645/2852/183/387597/1946/90527/4986/1589/4760/54905/114131/…
GO:0048018	MF	receptor ligand activity	482	0.512174	1.26367	4.08074e-09	4.9396e-07	4.04986e-07	6041	tags=51%, list=32%, signal=36%	64388/22943/335/4969/6750/9370/9723/651/223117/7060/7276/1114/7476/1511/3479/7044/5179/2255/2045/2662/3623/6366/6363/9547/7031/116/151449/1950/92304/7432/392255/2147/9542/7066/4880/10718/2202/252995/2695/23768/6423/8190/85480/4852/1489/4693/7483/54097/7484/2277/4856/80763/2922/2252/2259/4909/183/1946/4295/9365/2247/5368/114131/4922/84432/9573/654/2257/116173/26585/653/9607/25817/80310/145957/9244…
GO:0015850	BP	organic hydroxy compound transport	240	0.562352	1.37004	4.91615e-09	5.85929e-07	4.80389e-07	3663	tags=42%, list=19%, signal=35%	1268/335/337/338/10351/3745/1113/185/4842/1066/5950/6623/345/8435/6860/7432/1191/89872/84258/154664/1582/341359/6861/143425/64241/1813/6555/2587/201780/9194/150/5865/1133/359/183/6857/29881/6579/4986/123264/24/5023/4129/3356/6622/115584/1394/654/8431/1137/9607/222962/9965/160728/3737/3351/114880/5244/5020/53919/6530/3952/6570/1141/26281/948/51760/6581/140606/6531/148281/10599/8973/2668/1812/3990/…
GO:0099634	CC	postsynaptic specialization membrane	116	0.625819	1.4911	5.75156e-09	6.75111e-07	5.53507e-07	4397	tags=60%, list=23%, signal=47%	22871/347730/22865/22866/27092/2903/2066/2045/22986/2566/2556/729993/2894/2891/145581/57537/57689/491/57502/2901/401190/1008/64084/1000/2561/150/388336/2558/57497/1630/5913/23237/1949/2890/1740/4985/94030/3756/114798/3751/146395/79953/1141/9890/59284/2895/9127/107/2043/2915/8787/54413/5802/2911/57555/1742/775/8825/3752/1144/347731/53616/9746/26045/27091/10368/729956/64101/81832/57622
GO:0034329	BP	cell junction assembly	415	0.520019	1.28005	6.00861e-09	6.91861e-07	5.6724e-07	5289	tags=45%, list=28%, signal=33%	1501/9071/22943/57633/347/28513/26050/27445/22871/9074/4593/4884/4916/6422/26167/347730/5010/22865/9971/7476/4653/2066/2045/119/287/9378/2566/2596/88/149461/84189/56130/84623/2823/145581/577/23768/54549/91156/257194/26280/9379/56132/57502/23316/6092/53942/23363/51208/1826/1008/4915/10391/575/10804/23284/6910/1813/64084/139065/5317/1000/92737/11170/2561/8128/183/1946/64405/140689/266743/56133/6622…
GO:1901681	MF	sulfur compound binding	264	0.553386	1.35039	6.07287e-09	6.91861e-07	5.6724e-07	5046	tags=47%, list=27%, signal=35%	64388/338/5104/6422/1311/5549/7060/4057/1511/33/2255/340419/7448/26577/79625/8277/7148/8435/10178/222537/6403/284654/8839/343637/60495/9353/84570/4745/2147/11095/1991/84870/55753/4856/2252/151887/146760/2160/64093/3827/2247/5023/4018/350/1809/6586/89792/4753/51156/149998/7123/4353/2260/26281/5270/2254/64094/4053/2946/3990/333/64100/80339/9510/462/10468/6402/4023/6585/5802/83998/8838/50939/5196/95…
GO:0030546	MF	signaling receptor activator activity	489	0.509847	1.25856	7.29766e-09	8.19348e-07	6.71764e-07	6041	tags=51%, list=32%, signal=36%	64388/22943/335/4969/6750/9370/9723/651/223117/7060/7276/1114/7476/1511/3479/7044/5179/2255/2045/2662/3623/6366/6363/9547/7031/116/151449/1950/92304/7432/392255/2147/9542/7066/4880/10718/2202/252995/2695/23768/6423/8190/85480/4852/1489/4693/7483/54097/7484/2277/4856/80763/2922/2252/2259/4909/183/1946/4295/9365/2247/5368/114131/4922/84432/9573/654/2257/116173/26585/653/9607/25817/80310/145957/9244…
GO:0019226	BP	transmission of nerve impulse	73	0.680148	1.59296	7.55598e-09	8.36231e-07	6.85606e-07	4139	tags=70%, list=22%, signal=55%	6332/27092/11280/54112/6331/149461/7143/3736/8911/6328/8913/2898/6329/4915/23114/2852/1133/183/6326/4099/5023/2257/6335/9607/6334/3737/6323/3751/10242/1143/1816/59284/83700/8506/1812/27094/1180/8912/57731/58524/6336/1901/2281/552/51738/551/6324/2741/27091/146183/10368
GO:0071805	BP	potassium ion transmembrane transport	209	0.570841	1.38532	9.10589e-09	9.93568e-07	8.14603e-07	4856	tags=55%, list=26%, signal=41%	3249/57628/3745/170850/3787/477/10021/486/3755/845/287/343450/88/3777/389015/3776/259232/1804/30820/3773/3736/482/3788/6616/60598/6000/480/56479/2273/3739/9312/27133/4986/23416/3778/219527/3746/479/6559/131096/57419/27012/9992/3768/3763/30818/10060/3737/3780/6833/3756/65267/89822/3751/3754/10242/3750/6557/9472/3741/27094/348980/3779/3757/126755/285195/3738/157855/81033/495/56660/5999/53828/51305/…
GO:0072503	BP	cellular divalent inorganic cation homeostasis	484	0.510755	1.26041	1.01392e-08	1.09095e-06	8.94441e-07	6524	tags=53%, list=34%, signal=36%	1268/887/111/10590/2740/79608/774/55532/27112/169026/477/185/6869/6863/931/2903/117/4842/6366/845/6363/5731/116/287/5314/23566/3777/6547/2147/284612/64072/5733/846/1991/6543/5350/491/9104/84239/6261/10345/5745/22953/57338/799/643/2898/3358/844/57158/1813/84502/2587/148/79054/7220/2852/183/55283/3827/2247/5023/7781/781/2840/3356/6622/57419/2890/779/9900/286097/5587/2843/1238/1756/5156/6358/3351/28…
GO:0031674	CC	I band	139	0.600586	1.43792	1.33694e-08	1.41881e-06	1.16325e-06	4381	tags=53%, list=23%, signal=41%	84700/1674/91977/845/287/57159/88/6331/4634/55800/171024/91156/6261/84676/11155/84665/5239/23363/2318/844/57158/148/8789/81493/26287/51676/779/342527/1756/27295/6334/4703/51778/89/339855/6323/1410/80206/9499/10398/6521/8470/84033/8572/283807/10979/6263/3741/79933/58529/9457/1466/2281/70/27063/4892/118461/775/3270/6262/7273/2316/91624/4660/6546/129446/667/4624/11346/114907/859/1073/26548
GO:1904874	BP	positive regulation of telomerase RNA localization to Cajal body	15	-0.801077	-3.04203	1.48345e-08	1.55301e-06	1.27328e-06	1538	tags=67%, list=8%, signal=61%	7203/10576/6950/908/10575/22948/10694/55651/10574/1736
GO:0043062	BP	extracellular structure organization	305	0.535555	1.31182	1.57058e-08	1.6223e-06	1.33009e-06	5238	tags=50%, list=28%, signal=37%	3249/22854/1311/1511/1310/1286/79625/2192/7148/4629/1285/60495/4239/25890/83872/2006/7143/1287/1545/7177/1288/171019/11095/7092/1991/4316/8516/23768/57188/1215/6423/8190/84171/1280/80070/170692/5212/10218/11107/3036/89932/1297/151887/256764/183/79875/5340/64093/10516/7373/26585/4868/11005/5156/1805/5644/170690/1296/2295/1295/8510/90102/2199/4054/8434/2670/81794/64094/4921/165/333/10893/54507/6939…
GO:0008016	BP	regulation of heart contraction	198	0.568637	1.3784	1.64846e-08	1.68034e-06	1.37767e-06	4838	tags=54%, list=26%, signal=40%	6327/2740/1113/477/10021/1674/4842/845/287/6331/4634/27129/6330/55800/6547/6543/1129/5350/491/482/121643/10345/6508/8913/5348/6910/1813/80763/9096/148/7220/183/781/11149/7068/29119/1756/9992/3768/79191/2258/10060/5020/146/6271/492/1910/84525/2946/3741/100506013/3757/8912/57731/147/81033/796/783/6336/6474/10699/30845/6870/7042/2281/552/5999/3670/186/55328/775/3270/64091/6262/6640/23704/857/6324/23…
GO:0005539	MF	glycosaminoglycan binding	232	0.557638	1.35685	1.80421e-08	1.81522e-06	1.48826e-06	5831	tags=59%, list=31%, signal=42%	64388/338/5104/6422/1311/5549/7060/4057/1511/2255/340419/7448/26577/79625/7148/10178/6403/284654/8839/343637/9353/84570/4745/2147/26032/11095/1991/3697/5212/84870/4856/2252/3698/151887/50859/146760/3026/2160/64093/3827/653808/2247/3512/4018/350/1809/6586/1634/114770/4753/51156/149998/7123/4353/2260/5270/2254/64094/4053/3990/333/64100/1463/9510/462/55576/6402/4023/6585/5802/83998/8838/50939/5196/9…
GO:0015079	MF	potassium ion transmembrane transporter activity	153	0.588708	1.41537	1.90805e-08	1.89509e-06	1.55373e-06	5720	tags=68%, list=30%, signal=48%	3745/170850/3787/477/10021/3755/343450/3777/389015/3776/30820/3773/3736/2901/3788/2899/6616/60598/480/2898/56479/3739/9312/27133/23416/3778/219527/3746/479/6559/131096/57419/27012/9992/3768/3763/30818/10060/3737/3780/6833/3756/89822/3751/3754/2900/10242/3750/6557/3741/27094/348980/3779/3757/126755/285195/3738/81033/495/56660/53828/51305/123041/25769/93107/3748/23704/496/23415/3790/90134/3747/3752…
GO:0044306	CC	neuron projection terminus	129	0.603727	1.44172	1.95997e-08	1.89798e-06	1.55611e-06	4146	tags=51%, list=22%, signal=40%	440279/10590/5179/6623/63923/3776/246213/6572/6547/1395/846/6543/3736/7345/11341/4852/2901/2899/2898/4915/1813/29993/150/2852/6857/4986/6506/3746/5368/114131/6622/4922/4985/1756/5122/3737/3351/5020/120892/553/1393/6570/8492/2043/57010/3738/796/5579/7287/8927/5582/6571/4919/1742/7162/5798/57282/794/23025/10814/3747/4923/6546/85458/6620/1006
GO:0045229	BP	external encapsulating structure organization	307	0.534625	1.30986	1.95997e-08	1.89798e-06	1.55611e-06	5238	tags=50%, list=28%, signal=37%	3249/22854/1311/1511/1310/1286/79625/2192/7148/4629/1285/60495/4239/25890/83872/2006/7143/1287/1545/7177/1288/171019/11095/7092/1991/4316/8516/23768/57188/1215/6423/8190/84171/1280/80070/170692/5212/10218/11107/3036/89932/1297/151887/256764/183/79875/5340/64093/10516/7373/26585/4868/11005/5156/1805/5644/170690/1296/2295/1295/8510/388697/90102/2199/4054/8434/2670/81794/64094/4921/165/333/10893/545…
GO:0030016	CC	myofibril	227	0.555608	1.35126	2.3234e-08	2.22215e-06	1.82189e-06	5179	tags=51%, list=27%, signal=38%	84700/4604/1674/91977/845/287/57159/88/6331/4634/55800/171024/25802/91156/7140/6261/84676/11155/7111/84665/5239/23363/2318/844/202333/57158/7134/8736/148/8789/23336/4619/81493/26287/51676/779/342527/8735/1756/27295/4620/115557/6334/10060/4703/51778/92235/89/23345/339855/6323/4626/1410/80206/9499/10398/6521/8470/84033/8572/4607/283807/10979/6263/3741/79933/58529/137735/343263/4313/9457/10324/1466/…
GO:0030017	CC	sarcomere	209	0.565949	1.37344	2.4532e-08	2.31398e-06	1.89718e-06	5179	tags=53%, list=27%, signal=39%	84700/1674/91977/845/287/57159/88/6331/4634/55800/171024/25802/91156/7140/6261/84676/11155/7111/84665/5239/23363/2318/844/202333/57158/7134/8736/148/8789/4619/81493/26287/51676/779/342527/1756/27295/4620/115557/6334/10060/4703/51778/92235/89/23345/339855/6323/4626/1410/80206/9499/10398/6521/8470/84033/8572/4607/283807/10979/6263/3741/79933/58529/137735/343263/4313/9457/10324/1466/2281/70/27063/48…
GO:0030198	BP	extracellular matrix organization	304	0.534688	1.30973	2.47916e-08	2.31398e-06	1.89718e-06	5238	tags=50%, list=28%, signal=37%	3249/22854/1311/1511/1310/1286/79625/2192/7148/4629/1285/60495/4239/25890/83872/2006/7143/1287/1545/7177/1288/171019/11095/7092/1991/4316/8516/23768/57188/1215/6423/8190/84171/1280/80070/170692/5212/10218/11107/3036/89932/1297/151887/256764/183/79875/5340/64093/10516/7373/26585/4868/11005/5156/1805/5644/170690/1296/2295/1295/8510/90102/2199/4054/8434/2670/81794/64094/4921/165/333/10893/54507/6939…
GO:1904062	BP	regulation of cation transmembrane transport	331	0.529493	1.29943	2.583e-08	2.37783e-06	1.94953e-06	5428	tags=49%, list=29%, signal=36%	6327/22871/5649/5354/57628/3787/477/27092/486/4842/3755/845/287/88/6331/6330/59285/1804/55800/30820/2147/729993/3736/5350/9104/482/10345/785/3788/57338/6000/799/844/5348/57158/1813/84502/2273/2259/7220/150/388336/23542/440829/2852/183/4986/644139/219527/5023/3746/781/23237/6622/154/1394/2257/4988/5587/1756/9992/30818/53826/6236/2258/130497/6833/65267/50944/23072/342667/146395/1393/930/53822/9472/…
GO:0060047	BP	heart contraction	234	0.555905	1.35306	2.60896e-08	2.37783e-06	1.94953e-06	5032	tags=52%, list=27%, signal=38%	6327/2740/1113/477/10021/1674/4842/845/287/6331/4634/27129/6330/55800/6547/6543/1129/5350/491/6445/482/121643/10345/6508/8913/5348/7134/6910/1813/80763/9096/148/7220/183/781/11149/7068/29119/2257/1756/9992/3768/6444/79191/2258/10060/5020/146/6323/6271/492/1910/4607/84525/2946/3741/100506013/3757/8912/57731/147/81033/796/783/6336/6474/10699/30845/6870/7042/2281/552/70/5999/3670/186/55328/7852/775/…
GO:0003018	BP	vascular process in circulatory system	259	0.543653	1.32623	3.00014e-08	2.70257e-06	2.21577e-06	5092	tags=51%, list=27%, signal=38%	1311/477/6528/185/6869/4842/4883/2266/9353/6456/84889/155/2837/6542/846/6543/482/554/6508/480/6338/9590/148/9194/150/4036/2852/183/3827/3778/6506/5023/3356/57419/154/654/342527/6540/222962/10060/5138/10991/3351/8671/2243/6833/9153/53919/7122/146/5139/553/10242/3952/6567/4881/1910/3953/9376/948/284/1816/64849/6581/1401/10979/1812/3741/59/2244/196740/3363/3779/152/147/6517/91807/6532/796/4313/2982/…
GO:0042445	BP	hormone metabolic process	229	0.555292	1.35071	3.20884e-08	2.85734e-06	2.34267e-06	6005	tags=55%, list=32%, signal=38%	83539/125/3249/9227/27344/8854/169026/7276/6528/1381/5126/1511/1583/590/5950/126/1586/1359/1545/2690/64377/10720/1559/1735/1382/127/1215/1646/1363/174/124/7173/6338/339761/2304/90527/1589/54905/10858/195814/654/1543/653/5156/145226/5122/6718/54361/2099/53919/220/6121/3952/6567/54658/1910/8630/7366/50506/9486/54577/140606/7363/1428/1558/8912/2834/2692/6447/438/405753/10699/441282/57016/1544/1734/3…
GO:0005201	MF	extracellular matrix structural constituent	172	0.579014	1.3984	3.26102e-08	2.87081e-06	2.35371e-06	5382	tags=65%, list=28%, signal=47%	4969/9370/4586/1311/5549/4588/8483/1310/4148/7448/1286/2192/7148/22915/10117/7980/1285/4239/2266/25890/83872/2006/84570/127435/1287/8076/10418/84467/1288/2202/90187/1280/80144/8406/10216/131368/1297/2813/4256/79875/4147/10516/3908/7373/7007/1805/256158/1634/1296/2243/81578/1295/2199/1834/4052/4053/165/2244/4237/1302/50939/2201/22917/8425/8292/2200/30008/79812/256076/4584/4060/3491/11117/22798/548…
GO:0060537	BP	muscle tissue development	382	0.516876	1.27051	3.52189e-08	3.06563e-06	2.51344e-06	5558	tags=48%, list=29%, signal=34%	22943/84700/8854/10021/2066/3479/1310/221476/5950/4629/4223/88/2139/6258/6331/2006/4634/3776/8516/9241/5350/6445/93649/6261/5079/22953/23414/2735/140628/8913/5239/23363/844/64208/57158/7134/10804/6910/54715/6608/9096/148/92737/4036/183/221662/2247/26011/51676/11149/26585/1756/4868/653/5156/57538/6444/79191/5915/130497/4703/51778/7021/8929/341405/89/4638/11023/80206/3488/26281/3481/2138/6943/2254/…
GO:0030534	BP	adult behavior	136	0.594766	1.42285	3.62624e-08	3.12139e-06	2.55915e-06	3761	tags=48%, list=20%, signal=39%	477/7545/6623/6900/9378/2566/84189/2695/7345/2743/9379/5079/4852/57502/7111/340990/9455/1813/4909/10752/4986/9369/6506/285671/525/3356/6622/1949/4985/2257/238/4988/1137/9607/80243/124925/2019/1600/50944/6323/114798/1393/3952/1141/1143/2668/1812/2043/57731/3236/163175/54413/58524/5413/1136/7200/6387/57555/2636/51738/680/221935/5071/4923/2741
GO:0006816	BP	calcium ion transport	411	0.512109	1.26029	3.99147e-08	3.39801e-06	2.78595e-06	5733	tags=49%, list=30%, signal=35%	5354/774/27112/477/931/27092/2903/117/4842/114780/6366/845/6363/287/1950/259232/59285/6547/2147/1179/2823/64072/846/6543/5350/491/9104/6261/10345/785/22953/57338/8911/816/8913/799/9455/3358/844/57158/1813/84502/148/79054/7220/150/2645/2852/183/55283/115352/2247/5023/781/3356/6622/80036/57419/779/1394/4985/4988/1137/286097/5587/140803/1756/9992/5957/6236/168507/2814/65267/55799/56923/4638/342667/9…
GO:0051963	BP	regulation of synapse assembly	101	0.628162	1.48877	4.30452e-08	3.62469e-06	2.9718e-06	4152	tags=58%, list=22%, signal=46%	22943/57633/26050/22871/4593/4884/4916/347730/22865/7476/2045/9378/84189/145581/577/23768/257194/26280/23316/6092/4915/575/64084/139065/8128/1946/6622/5789/11141/94030/84631/9423/375323/4914/5020/114798/158038/79953/1141/10082/2895/54413/6585/266727/869/8292/4208/57555/57463/5021/7162/51738/654429/347731/27286/54674/9746/26045/147381
GO:0050807	BP	regulation of synapse organization	206	0.562393	1.36434	4.3567e-08	3.62918e-06	2.97547e-06	5324	tags=51%, list=28%, signal=37%	22943/57633/547/26050/22871/5649/4593/4884/4916/347730/22865/7476/2045/5063/9378/158866/84189/2823/145581/577/23768/257194/26280/816/23316/6092/5100/4915/575/1813/64084/139065/1000/8128/1946/57497/8499/23237/6622/5789/11141/94030/84631/9423/375323/4914/5020/120892/114798/158038/79953/1141/10082/2895/9758/4776/83992/2043/9148/54413/26115/6585/1496/266727/869/8292/4208/57555/57463/5021/7162/1627/51…
GO:0051960	BP	regulation of nervous system development	428	0.51098	1.25791	4.40887e-08	3.63357e-06	2.97908e-06	4453	tags=38%, list=23%, signal=30%	22943/57633/26050/22871/5649/9723/223117/4916/347730/22865/7476/2045/23105/23566/222223/5063/9378/6258/8153/9353/6860/7143/4747/84189/5803/2147/577/1382/23768/9241/283659/3897/5324/10810/816/57611/23316/6092/1620/140578/443/23363/1826/4135/4915/575/1813/64084/3815/139065/6608/400746/8128/4036/91584/2852/1946/4099/58494/4137/1630/1949/4133/26011/429/5789/4988/11141/94030/84631/9423/2258/1600/4914/…
GO:0098889	CC	intrinsic component of presynaptic membrane	74	0.665648	1.55933	4.51322e-08	3.68042e-06	3.01748e-06	2912	tags=59%, list=15%, signal=51%	1268/57863/22854/1272/2066/6538/2823/8745/2913/3736/491/2901/401190/53942/1008/1813/148/1000/150/6326/4986/2558/6506/5023/3746/3356/1949/4985/5789/4988/53826/3737/3351/2900/27255/492/1141/6531/8973/1812/2043/3738/6532/6336
GO:0031225	CC	anchored component of membrane	167	0.578586	1.39639	4.7741e-08	3.8526e-06	3.15865e-06	5199	tags=57%, list=27%, signal=42%	2674/55600/2348/137797/2676/22854/8000/115827/1272/5314/6900/133121/161357/56963/1271/2719/23627/5067/66004/257194/420/4045/401190/130576/53942/2675/152330/2813/2572/338328/54742/5865/1946/146760/7007/2262/57127/64180/1087/203074/43/4684/8434/27255/2352/57126/10232/6853/248/10082/762/1368/4978/147719/11181/7512/8581/7035/130574/266727/353091/249/4326/417/135228/1742/2350/4062/360226/8482/4974/390…
GO:0098948	CC	intrinsic component of postsynaptic specialization membrane	80	0.651868	1.53002	5.03498e-08	4.02124e-06	3.29691e-06	5376	tags=78%, list=28%, signal=56%	22871/347730/22865/27092/2903/2066/2045/22986/2566/2556/729993/2894/145581/57689/491/57502/2901/401190/1008/64084/1000/2561/150/388336/2558/57497/1630/1949/2890/4985/94030/114798/3751/146395/1141/9890/59284/2895/9127/107/54413/5802/57555/1742/3752/1144/347731/53616/9746/26045/10368/729956/64101/81832/57622/10369/4897/1128/2555/254263/3361/55584
GO:0043292	CC	contractile fiber	237	0.551309	1.34217	5.19151e-08	4.10394e-06	3.36472e-06	5179	tags=51%, list=27%, signal=37%	84700/4604/1674/91977/845/4629/287/57159/88/6331/4634/55800/171024/25802/91156/7140/6261/84676/11155/7111/84665/5239/23363/2318/844/202333/57158/7134/8736/148/8789/23336/4619/81493/26287/51676/779/342527/8735/1756/27295/4620/115557/6334/10060/4703/51778/92235/89/23345/339855/6323/4626/1410/80206/9499/10398/6521/8470/84033/8572/4607/283807/10979/6263/3741/79933/59/58529/137735/343263/4313/9457/103…
GO:0042383	CC	sarcolemma	131	0.59837	1.42895	5.71532e-08	4.47238e-06	3.6668e-06	4380	tags=53%, list=23%, signal=41%	28965/3745/477/27092/1674/4842/287/6331/59285/6547/54221/6442/6543/6445/6261/5239/2318/844/5348/64208/361/148/1000/6326/23336/5152/81493/8910/3908/781/113146/779/11149/4988/1756/6444/6833/6323/8082/90342/9499/342667/9472/84033/59284/6263/786/1180/90523/2692/6769/6517/783/858/493829/775/64091/6262/6640/857/6324/5962/137868/3752/6546/859/3764/239/7412/7402
GO:0050803	BP	regulation of synapse structure or activity	212	0.556671	1.35091	6.02991e-08	4.67137e-06	3.82995e-06	5324	tags=50%, list=28%, signal=37%	22943/57633/547/26050/22871/5649/4593/4884/4916/347730/22865/7476/2045/5063/57030/9378/158866/84189/246213/2823/145581/577/23768/257194/26280/816/23316/6092/5100/4915/575/1813/64084/139065/1000/8128/1946/57497/8499/23237/6622/5789/11141/94030/84631/9423/375323/4914/5020/120892/114798/158038/79953/1141/10082/2895/9758/4776/83992/2043/9148/54413/26115/6585/1496/266727/869/8292/4208/57555/57463/5021…
GO:0043679	CC	axon terminus	113	0.614833	1.46318	6.34451e-08	4.86643e-06	3.98987e-06	4146	tags=52%, list=22%, signal=41%	440279/10590/5179/6623/63923/3776/246213/6572/6547/1395/846/6543/3736/4852/2901/2899/2898/4915/1813/29993/150/2852/4986/3746/5368/114131/6622/4922/4985/5122/3737/3351/5020/120892/553/1393/6570/8492/2043/57010/3738/796/5579/7287/5582/6571/4919/7162/5798/57282/794/23025/10814/3747/4923/6546/85458/6620/1006
GO:0003015	BP	heart process	244	0.549529	1.33855	6.65911e-08	5.05766e-06	4.14665e-06	5032	tags=51%, list=27%, signal=38%	6327/2740/1113/477/10021/1674/4842/845/287/6331/4634/27129/6330/55800/6547/6543/1129/5350/491/6445/482/121643/10345/6508/8913/5348/7134/6910/1813/80763/9096/148/7220/183/781/11149/7068/29119/2257/1756/9992/3768/6444/79191/2258/10060/5020/146/6323/25937/6271/492/1910/4607/84525/2946/3741/100506013/3757/8912/57731/147/81033/796/783/6336/6474/10699/30845/6870/7042/2281/552/70/5999/3670/186/55328/785…
GO:0072001	BP	renal system development	310	0.53014	1.29909	6.86884e-08	5.1663e-06	4.23572e-06	4745	tags=43%, list=25%, signal=33%	2674/341640/168002/9370/80000/6422/54798/8854/185/3158/2066/2255/2045/7704/1286/5950/5314/1285/9353/28999/2719/392255/84623/8516/9241/9104/93649/10736/80144/2302/6092/57216/7484/6608/9096/4036/5455/359/183/26108/2247/79659/1579/654/2018/5979/26585/4868/9863/80310/5156/9244/80114/7380/79191/5915/170690/54361/130497/7021/168667/120892/25937/7477/79727/1910/2138/6943/2736/57545/26249/5176/284/5076/2…
GO:0007269	BP	neurotransmitter secretion	144	0.584862	1.40316	7.18343e-08	5.30001e-06	4.34535e-06	3636	tags=42%, list=19%, signal=34%	1268/140730/27445/22871/440279/7476/22999/6623/6854/9378/8224/6860/9699/9379/9627/2901/6861/6616/143425/1813/148/150/2852/6857/5023/2914/26059/3356/6622/5217/9900/3351/8618/22895/120892/8448/6853/1143/8973/1812/107/91683/320/783/84446/9381/5579/5413/1136/23208/5582/4208/8938/8447/5028/8825/23025/6865/10814/1142/5071
GO:0099643	BP	signal release from synapse	144	0.584862	1.40316	7.18343e-08	5.30001e-06	4.34535e-06	3636	tags=42%, list=19%, signal=34%	1268/140730/27445/22871/440279/7476/22999/6623/6854/9378/8224/6860/9699/9379/9627/2901/6861/6616/143425/1813/148/150/2852/6857/5023/2914/26059/3356/6622/5217/9900/3351/8618/22895/120892/8448/6853/1143/8973/1812/107/91683/320/783/84446/9381/5579/5413/1136/23208/5582/4208/8938/8447/5028/8825/23025/6865/10814/1142/5071
GO:0035249	BP	synaptic transmission, glutamatergic	93	0.632925	1.49501	7.2883e-08	5.32665e-06	4.36719e-06	4395	tags=59%, list=23%, signal=46%	1268/22943/22871/5649/440279/477/27092/57030/9378/7143/246213/2894/2891/2913/2901/2899/2898/1813/4920/2917/1000/23542/6857/5023/2914/3356/3351/4914/120892/2900/5270/9890/59284/2895/1812/2916/9162/2915/54413/2911/4208/57555/5021/57616/23025/5071/9746/27185/27091/2897/10368/729230/1006/5327/85358
GO:0019228	BP	neuronal action potential	35	0.764941	1.72615	8.44183e-08	6.11204e-06	5.01111e-06	2912	tags=69%, list=15%, signal=58%	6332/11280/54112/6331/3736/8911/6328/8913/2898/6329/2852/6326/5023/2257/6335/6334/3737/6323/3751/10242/1812/27094/8912/6336
GO:0030018	CC	Z disc	127	0.597096	1.42572	1.19086e-07	8.54222e-06	7.00356e-06	4381	tags=52%, list=23%, signal=40%	84700/1674/91977/845/287/57159/88/6331/55800/171024/91156/6261/84676/11155/84665/5239/23363/2318/844/57158/148/8789/81493/51676/1756/27295/6334/4703/51778/89/339855/6323/1410/80206/9499/10398/6521/8470/84033/8572/283807/6263/3741/79933/58529/9457/1466/2281/4892/118461/775/3270/6262/7273/2316/91624/4660/6546/129446/667/4624/11346/114907/859/1073/26548
GO:0043197	CC	dendritic spine	172	0.570444	1.3777	1.25409e-07	8.91325e-06	7.30776e-06	5043	tags=49%, list=27%, signal=37%	22871/10642/4804/477/2903/4842/88/5064/55607/6547/729993/2891/2823/56899/2913/6543/8516/57537/491/26232/401190/4915/575/1813/3739/2893/388336/440829/2852/4137/57451/8499/23237/2890/5577/4985/4988/124925/22895/50944/3751/1410/79953/3750/4355/373509/8572/2892/2895/9758/1812/9127/9001/9162/83992/2043/2915/320/9148/26115/54873/4131/23208/1742/3748/5662/4923/26052/3752/2213/91752/6546/2550/11346/72995…
GO:0022843	MF	voltage-gated cation channel activity	143	0.588481	1.411	1.31732e-07	9.27753e-06	7.60643e-06	4856	tags=64%, list=26%, signal=48%	1268/3745/774/170850/3787/10021/27092/2903/3755/343450/3777/3776/59285/3773/3736/6261/785/3788/8911/6616/8913/56479/3739/9312/27133/23416/3778/219527/3746/781/131096/779/27012/4988/9992/3768/3763/10060/3737/3351/3780/6833/3756/55799/3751/3754/9254/3750/773/59284/786/3741/348980/777/3757/126755/8912/3738/81033/783/117144/51305/775/93107/3748/23704/23415/3790/90134/3747/3752/3782/117531/378807/3743…
GO:0001655	BP	urogenital system development	350	0.518637	1.27344	1.44378e-07	1.00766e-05	8.26152e-06	4745	tags=42%, list=25%, signal=32%	2674/341640/168002/9370/768239/80000/6422/54798/8854/185/3158/2066/2255/2045/7704/1286/5950/5314/1285/367/9353/28999/2719/392255/84623/8516/9241/9104/93649/5324/10736/80144/2302/2735/6092/57216/7484/6608/9096/4036/5455/359/183/26108/2247/79659/1579/654/2018/5979/26585/4868/9863/80310/5156/9244/80114/7380/79191/5915/170690/54361/130497/9420/7021/2099/168667/120892/25937/7477/79727/1910/2138/6943/2…
GO:0034706	CC	sodium channel complex	26	0.788097	1.74299	1.57654e-07	1.09049e-05	8.94065e-06	2912	tags=85%, list=15%, signal=72%	6327/6332/11280/6331/6330/55800/2901/2899/8911/6328/8913/2898/6329/6338/6340/6326/6335/6334/6323/2900/8912/6336
GO:0007204	BP	positive regulation of cytosolic calcium ion concentration	316	0.527824	1.29346	1.6967e-07	1.16322e-05	9.53694e-06	6169	tags=58%, list=33%, signal=40%	1268/887/111/2740/79608/774/27112/477/185/6869/6863/931/2903/117/4842/6366/845/6363/5731/116/287/23566/6547/2147/5733/6543/5350/6261/10345/22953/57338/799/643/3358/844/57158/1813/84502/2587/148/7220/2852/183/55283/3827/2247/5023/781/2840/3356/6622/779/5587/2843/1238/1756/5156/2814/1902/2099/5020/146/56923/553/930/773/1910/948/9472/1236/162514/6263/5737/1812/2946/5319/9001/2623/777/1233/147/796/78…
GO:0098839	CC	postsynaptic density membrane	89	0.630988	1.48709	1.75993e-07	1.19598e-05	9.80557e-06	4397	tags=61%, list=23%, signal=47%	22865/22866/27092/2903/2066/2045/22986/729993/2894/2891/145581/57537/57689/491/57502/2901/401190/64084/150/388336/57497/1630/23237/1949/2890/1740/4985/94030/3756/114798/146395/79953/9890/59284/2895/107/2043/2915/8787/5802/2911/1742/775/8825/347731/53616/9746/26045/27091/10368/729956/64101/81832/57622
GO:0099060	CC	integral component of postsynaptic specialization membrane	77	0.651852	1.52843	1.92855e-07	1.29917e-05	1.06516e-05	5376	tags=78%, list=28%, signal=56%	22871/347730/22865/27092/2903/2066/2045/22986/2566/2556/729993/2894/145581/57689/491/57502/2901/1008/64084/1000/2561/150/388336/2558/57497/1630/1949/2890/4985/94030/114798/3751/146395/1141/9890/59284/2895/9127/107/54413/5802/57555/3752/1144/347731/53616/9746/26045/10368/729956/64101/81832/57622/10369/4897/1128/2555/254263/3361/55584
GO:1900262	BP	regulation of DNA-directed DNA polymerase activity	13	-0.809102	-2.88098	2.05044e-07	1.35767e-05	1.11312e-05	1211	tags=85%, list=6%, signal=79%	63922/5984/5985/84296/5982/79075/64785/9837/5983/5111/51659
GO:1900264	BP	positive regulation of DNA-directed DNA polymerase activity	13	-0.809102	-2.88098	2.05044e-07	1.35767e-05	1.11312e-05	1211	tags=85%, list=6%, signal=79%	63922/5984/5985/84296/5982/79075/64785/9837/5983/5111/51659
GO:0051962	BP	positive regulation of nervous system development	262	0.536971	1.31011	2.11824e-07	1.39068e-05	1.14018e-05	4419	tags=42%, list=23%, signal=33%	57633/26050/22871/5649/347730/22865/7476/23566/5063/9378/8153/9353/4747/84189/5803/577/1382/23768/3897/5324/816/57611/23316/6092/140578/443/23363/1826/4135/4915/575/1813/64084/3815/139065/6608/8128/4036/91584/2852/1946/4099/4137/26011/429/5789/4988/11141/94030/84631/9423/4914/22891/5365/5020/4803/114798/158038/1638/79953/7732/2670/5270/5176/2290/2895/2737/9001/146433/2043/2915/9148/6604/57165/544…
GO:0035150	BP	regulation of tube size	139	0.584018	1.39825	2.13932e-07	1.39271e-05	1.14185e-05	5033	tags=58%, list=27%, signal=43%	1311/477/185/6869/4842/4883/2266/155/2837/846/554/6338/7484/148/150/2852/183/3827/3778/5023/3356/154/342527/3351/2243/146/553/10242/3952/4881/1910/1816/1401/1812/3741/59/2244/196740/3363/3779/152/147/6532/796/4313/2982/4879/2303/10800/257313/552/1131/5592/6649/186/5021/5345/5028/551/6640/857/1908/3357/80852/6546/151/1909/59272/3792/59342/27345/2149/4878/4846/153/5997/3274/135/6915/10365/5743
GO:0007218	BP	neuropeptide signaling pathway	105	0.612445	1.45399	2.30876e-07	1.46606e-05	1.20199e-05	5488	tags=67%, list=29%, signal=48%	4886/114815/27344/6863/5179/283869/10178/116/10886/22986/2837/57537/2743/1363/4852/2587/2922/8001/11248/2861/4986/5368/4922/4889/4985/4988/9607/84539/56923/9427/5697/64106/85569/6866/4158/10888/6753/3061/2834/10316/5443/84634/6447/796/11249/4879/10800/2825/84109/51083/4923/4987/4829/2741/2925/11251/4887/5539/4935/10887/387129/6752/4878/128674/51289/57105/3062/23620/2847/4828
GO:0150034	CC	distal axon	270	0.535776	1.30822	2.30876e-07	1.46606e-05	1.20199e-05	4146	tags=39%, list=22%, signal=31%	1268/440279/10642/10590/11075/4804/347730/5179/5101/6623/63923/2596/3776/4747/246213/6572/6547/2823/1395/846/6543/3736/140767/3897/4852/2901/2899/6616/1826/2898/4915/24141/1813/29993/85300/322/150/2852/4986/3746/4137/1630/57451/26059/5368/114131/6622/4922/4133/4985/1809/8941/9024/5122/2258/3737/3351/81551/5020/120892/8633/1996/553/1393/6570/10439/9638/3800/9001/8492/2043/57010/3738/55811/796/8444…
GO:0023061	BP	signal release	445	0.5039	1.24176	2.30876e-07	1.46606e-05	1.20199e-05	6169	tags=48%, list=33%, signal=33%	1268/140730/9370/27445/22871/440279/111/640/6422/3745/1113/2850/169026/185/6869/9971/7476/22999/3623/222546/5950/6623/116/6854/9378/8224/2266/6860/7432/84258/9699/846/2695/9379/1363/886/341359/9627/2901/6861/6616/143425/3358/54097/1813/4856/2587/148/2922/25924/150/2645/2852/183/387597/1946/6857/4986/4760/5023/4129/2914/26059/3356/114131/6622/5217/1394/654/8431/9900/4988/1137/9607/9024/3737/3351/2…
GO:0034709	CC	methylosome	12	-0.797156	-2.67848	2.40401e-07	1.51413e-05	1.2414e-05	2046	tags=83%, list=11%, signal=74%	1207/10419/6632/6634/79084/2079/6637/6636/6635/6628
GO:0044309	CC	neuron spine	173	0.568972	1.37428	2.64765e-07	1.64091e-05	1.34534e-05	5043	tags=49%, list=27%, signal=36%	22871/10642/4804/477/2903/4842/88/5064/55607/6547/729993/2891/2823/56899/2913/6543/8516/57537/491/26232/401190/4915/575/1813/3739/2893/388336/440829/2852/4137/57451/8499/23237/2890/5577/4985/4988/124925/22895/50944/3751/1410/79953/3750/4355/373509/8572/2892/2895/9758/1812/9127/9001/9162/83992/2043/2915/320/9148/26115/54873/4131/23208/1742/3748/5662/4923/26052/3752/2213/91752/6546/2550/11346/72995…
GO:0099504	BP	synaptic vesicle cycle	182	0.564398	1.36524	2.64765e-07	1.64091e-05	1.34534e-05	3692	tags=38%, list=19%, signal=31%	1268/140730/9892/27445/22871/440279/7476/22999/6623/6854/57030/8224/6456/6860/246213/6457/9699/154664/57502/2901/6861/6616/143425/1813/148/29993/1000/150/5865/6857/5023/26059/3356/6622/5217/9900/273/11037/9024/3351/8618/120892/79953/8448/6570/6853/8973/1812/107/9829/91683/320/6517/54413/783/84446/9381/5579/5413/8927/5582/6571/57555/8447/5028/23025/10814/1142/85439/26052
GO:0005753	CC	mitochondrial proton-transporting ATP synthase complex	18	-0.690917	-3.08525	3.0432e-07	1.87109e-05	1.53406e-05	2146	tags=78%, list=11%, signal=69%	10632/10476/9556/539/84833/9551/515/509/498/516/521/513/506/518
GO:0001822	BP	kidney development	301	0.526385	1.28852	3.24072e-07	1.97684e-05	1.62076e-05	4745	tags=43%, list=25%, signal=32%	2674/341640/168002/9370/80000/6422/54798/8854/185/3158/2066/2255/2045/7704/1286/5314/1285/9353/28999/2719/392255/84623/8516/9241/9104/10736/80144/2302/6092/57216/7484/6608/4036/5455/359/183/26108/2247/79659/1579/654/5979/26585/4868/9863/80310/5156/9244/80114/7380/79191/5915/170690/54361/130497/7021/168667/120892/25937/7477/79727/1910/2138/6943/2736/57545/26249/5176/284/5076/2668/1028/84662/59/273…
GO:0005750	CC	mitochondrial respiratory chain complex III	11	-0.853603	-2.6248	3.29287e-07	1.97751e-05	1.62131e-05	2671	tags=100%, list=14%, signal=86%	617/440567/27089/10975/29796/7388/7381/7385/1537/7384
GO:0045275	CC	respiratory chain complex III	11	-0.853603	-2.6248	3.29287e-07	1.97751e-05	1.62131e-05	2671	tags=100%, list=14%, signal=86%	617/440567/27089/10975/29796/7388/7381/7385/1537/7384
GO:0048167	BP	regulation of synaptic plasticity	184	0.559515	1.35352	3.45252e-07	2.05744e-05	1.68684e-05	5106	tags=49%, list=27%, signal=36%	152404/5649/440279/10590/6344/3745/347730/2903/22999/6900/22986/6860/7143/6547/729993/1395/9699/2695/6543/57537/9145/57338/6616/816/2898/4915/575/1813/84502/152330/3815/11170/388336/440829/183/266743/4137/26059/23237/6622/2890/10858/6343/2670/4355/5270/4130/1816/51201/2895/1812/107/4776/2043/2915/91683/7101/9148/84446/1524/4131/869/5582/5764/4208/1742/1627/25769/57616/57282/794/10814/1959/114/260…
GO:0003688	MF	DNA replication origin binding	16	-0.720365	-2.75434	3.75244e-07	2.2191e-05	1.81938e-05	1250	tags=56%, list=7%, signal=53%	5001/5422/4174/4171/3329/55388/8318/4998/990
GO:1903405	BP	protein localization to nuclear body	12	-0.783237	-2.63171	4.02012e-07	2.34164e-05	1.91986e-05	1538	tags=75%, list=8%, signal=69%	7203/10576/6950/908/10575/22948/10694/10574/1736
GO:1904867	BP	protein localization to Cajal body	12	-0.783237	-2.63171	4.02012e-07	2.34164e-05	1.91986e-05	1538	tags=75%, list=8%, signal=69%	7203/10576/6950/908/10575/22948/10694/10574/1736
GO:0007411	BP	axon guidance	234	0.542534	1.32052	4.29976e-07	2.48584e-05	2.03808e-05	5998	tags=56%, list=32%, signal=39%	128434/5649/9723/2676/223117/4804/9211/1272/2045/57453/56896/151449/6900/9378/2596/285220/9353/91653/7143/494470/4009/23768/9241/3897/658/137970/6092/84665/53942/3798/1826/23114/152330/6608/10752/91584/1946/9369/3908/1630/1749/1949/4917/5979/8941/6586/2042/9423/115557/4914/56956/5365/8633/4684/3199/11023/8577/2046/9499/27255/2051/2736/57556/56920/2290/9638/2668/10500/347733/2737/3800/2043/1400/65…
GO:0005267	MF	potassium channel activity	120	0.594893	1.41811	4.81061e-07	2.76058e-05	2.26333e-05	5720	tags=72%, list=30%, signal=50%	3745/170850/3787/10021/3755/343450/3777/3776/30820/3773/3736/2901/3788/2899/6616/60598/2898/56479/3739/9312/27133/23416/3778/219527/3746/131096/27012/9992/3768/3763/30818/10060/3737/3780/6833/3756/89822/3751/3754/2900/10242/3750/3741/27094/348980/3779/3757/126755/3738/81033/56660/53828/51305/93107/3748/23704/23415/3790/90134/3747/3752/3782/3743/9132/7881/610/2897/5311/3764/57582/23630/83795/27345…
GO:0042776	BP	proton motive force-driven mitochondrial ATP synthesis	16	-0.715402	-2.73536	4.95617e-07	2.82319e-05	2.31467e-05	2409	tags=75%, list=13%, signal=66%	10632/10476/65990/539/9551/515/509/498/521/513/506/30968
GO:0051937	BP	catecholamine transport	71	0.643102	1.50481	5.06603e-07	2.86471e-05	2.34871e-05	3636	tags=62%, list=19%, signal=50%	1268/3745/1113/6623/6860/7432/84258/341359/6861/143425/1813/150/5865/1133/183/6857/4986/3356/6622/1137/9607/222962/3737/3351/5020/6530/1141/26281/51760/6581/6531/148281/8973/2668/1812/91683/152/83849/6387/23208/6571/5021/5028/5071
GO:0097485	BP	neuron projection guidance	235	0.543527	1.32276	5.23631e-07	2.93954e-05	2.41006e-05	5998	tags=56%, list=32%, signal=39%	128434/5649/9723/2676/223117/4804/9211/1272/2045/57453/56896/151449/6900/9378/2596/285220/9353/91653/7143/494470/4009/23768/9241/3897/658/137970/6092/84665/53942/3798/1826/23114/152330/6608/10752/91584/1946/9369/3908/1630/1749/1949/4917/5979/8941/6586/2042/9423/115557/4914/56956/5365/8633/4684/10570/3199/11023/8577/2046/9499/27255/2051/2736/57556/56920/2290/9638/2668/10500/347733/2737/3800/2043/1…
GO:0000727	BP	double-strand break repair via break-induced replication	12	-0.772167	-2.59452	6.13103e-07	3.4158e-05	2.80053e-05	932	tags=83%, list=5%, signal=79%	4174/84296/4171/4175/4172/8317/4176/8318/4173/51659
GO:0015837	BP	amine transport	99	0.61103	1.44659	6.17287e-07	3.4158e-05	2.80053e-05	3644	tags=57%, list=19%, signal=46%	1268/3745/1113/477/6623/6860/7432/84258/341359/6861/143425/1813/2917/150/5865/183/6857/4986/3356/6622/4889/9900/1137/9607/10991/3737/3351/5020/553/3952/6570/1141/26281/51760/148281/8973/2668/1812/51458/91683/152/83849/1136/7200/6387/552/23208/5999/6571/85413/5021/5028/551/6865/5071/4923
GO:0061337	BP	cardiac conduction	92	0.613898	1.44996	6.34315e-07	3.48514e-05	2.85738e-05	4566	tags=55%, list=24%, signal=42%	6327/477/10021/845/287/6331/6330/55800/6547/6543/5350/491/482/10345/6508/8913/6910/9096/7220/183/781/29119/9992/79191/10060/492/3741/3757/57731/81033/783/6336/10699/30845/2281/3670/775/3270/6262/23704/857/6324/2316/3752/478/6546/10052/51086/59272/23630/493
GO:0035725	BP	sodium ion transmembrane transport	173	0.563482	1.36102	6.93915e-07	3.78574e-05	3.10384e-05	4585	tags=49%, list=24%, signal=38%	6327/6332/55117/477/10021/486/4842/10568/11280/57030/6331/389015/6330/259232/55800/6547/6538/6543/482/8911/6328/8913/480/6329/5348/6338/6340/2259/6326/340024/479/6559/57419/2257/6335/6540/1756/28968/53826/2258/6334/8671/130497/65267/6323/23072/6530/53822/6557/6531/348980/8912/55515/285195/6569/6532/6336/54716/495/125206/53828/10786/123041/25769/9963/57282/6640/496/10246/6324/6539/478/6546/285335/…
GO:0030672	CC	synaptic vesicle membrane	103	0.603376	1.43107	7.10943e-07	3.82477e-05	3.13584e-05	3182	tags=42%, list=17%, signal=35%	440279/115827/6854/57030/8224/6860/246213/284612/9145/9899/6861/55530/143425/24141/1813/2572/22987/5865/6857/4986/7781/525/6622/2890/4985/9900/273/6833/22895/81615/120892/79953/8448/6570/6853/148281/9162/91683/5802/9381/132204/8927/6571
GO:0099501	CC	exocytic vesicle membrane	103	0.603376	1.43107	7.10943e-07	3.82477e-05	3.13584e-05	3182	tags=42%, list=17%, signal=35%	440279/115827/6854/57030/8224/6860/246213/284612/9145/9899/6861/55530/143425/24141/1813/2572/22987/5865/6857/4986/7781/525/6622/2890/4985/9900/273/6833/22895/81615/120892/79953/8448/6570/6853/148281/9162/91683/5802/9381/132204/8927/6571
GO:0031644	BP	regulation of nervous system process	137	0.577138	1.3811	7.19457e-07	3.84389e-05	3.15151e-05	4753	tags=51%, list=25%, signal=39%	22871/152404/5649/4884/27092/7476/22999/11280/9378/7432/7143/55273/6547/729993/9228/23467/9699/6543/56853/10810/57502/23316/9229/3358/4856/80763/400746/388336/183/4986/4099/58494/26011/154/4985/2257/4988/9607/5020/50944/120892/56923/66000/1910/1143/151647/3082/58512/84866/54413/2911/869/552/5999/57555/1742/51738/551/4923/4987/2741/1959/27091/729956/11343/81832/85358/10458/2149/4846
GO:0051382	BP	kinetochore assembly	18	-0.666593	-2.97664	7.90661e-07	4.19538e-05	3.43969e-05	521	tags=56%, list=3%, signal=54%	378708/201254/64105/1062/55839/387103/9787/64946/1063/1058
GO:0099056	CC	integral component of presynaptic membrane	67	0.651876	1.51972	8.64198e-07	4.55438e-05	3.73403e-05	2912	tags=58%, list=15%, signal=49%	1268/57863/2066/6538/2823/8745/2913/3736/491/2901/1008/1813/148/1000/150/6326/4986/2558/6506/5023/3746/3356/1949/4985/5789/4988/53826/3737/3351/2900/492/1141/6531/8973/1812/2043/3738/6532/6336
GO:1904869	BP	regulation of protein localization to Cajal body	11	-0.831949	-2.55821	9.71124e-07	5.04919e-05	4.13971e-05	1538	tags=82%, list=8%, signal=75%	7203/10576/6950/908/10575/22948/10694/10574/1736
GO:1904871	BP	positive regulation of protein localization to Cajal body	11	-0.831949	-2.55821	9.71124e-07	5.04919e-05	4.13971e-05	1538	tags=82%, list=8%, signal=75%	7203/10576/6950/908/10575/22948/10694/10574/1736
GO:0098982	CC	GABA-ergic synapse	70	0.648549	1.51709	1.0011e-06	5.14595e-05	4.21904e-05	4014	tags=61%, list=21%, signal=49%	1268/27445/347730/22865/2567/2066/2569/2566/2596/2556/6538/145581/2743/491/57502/53942/1008/1813/148/2561/150/1946/2558/140689/26059/9900/440073/84631/114798/3751/2554/492/1812/3084/54413/2982/266727/8927/57555/3752/2550/9746/26045
GO:1904851	BP	positive regulation of establishment of protein localization to telomere	10	-0.861167	-2.6402	1.00302e-06	5.14595e-05	4.21904e-05	1538	tags=90%, list=8%, signal=83%	7203/10576/6950/908/10575/22948/10694/10574/1736
GO:0010975	BP	regulation of neuron projection development	423	0.499044	1.22835	1.05243e-06	5.36395e-05	4.39778e-05	6344	tags=48%, list=33%, signal=33%	1268/22943/547/22871/5649/9723/11075/22854/223117/4916/6422/1272/7476/2045/79625/23105/23566/6900/5063/8153/9353/56963/158866/10690/7143/4747/577/1382/57689/6423/257194/482/3897/6616/816/57611/23316/6092/140578/23363/1826/4135/4915/114788/4920/29993/1000/91584/183/1946/146760/4099/4137/1630/10090/8499/23237/1949/80258/4133/389658/5789/5979/1809/238/11141/5587/9863/653/9024/2042/4139/124925/7025/9…
GO:0099146	CC	intrinsic component of postsynaptic density membrane	54	0.670671	1.55027	1.06955e-06	5.41554e-05	4.44007e-05	4586	tags=72%, list=24%, signal=55%	22865/27092/2903/2066/2045/22986/729993/2894/145581/57689/491/2901/401190/64084/150/388336/57497/1630/1949/2890/4985/94030/114798/146395/9890/59284/2895/107/5802/1742/347731/53616/9746/26045/10368/64101/81832/57622/10369
GO:0010959	BP	regulation of metal ion transport	379	0.506762	1.24583	1.12088e-06	5.63863e-05	4.62297e-05	5344	tags=45%, list=28%, signal=33%	7018/6327/5354/57628/55532/3787/477/1272/486/117/4842/3755/845/287/88/6331/1950/7432/6330/59285/1804/55800/30820/2147/846/286183/3736/5350/9104/482/10345/785/22953/3788/57338/816/6000/799/154215/9455/844/5348/57158/1813/84502/2273/2259/79570/7220/150/2645/2852/183/4986/115352/128414/219527/5023/3746/781/3356/6622/154/1394/4985/2257/5587/1756/9992/30818/53826/5957/6236/2258/130497/6833/65267/23072…
GO:1904816	BP	positive regulation of protein localization to chromosome, telomeric region	12	-0.752223	-2.5275	1.1833e-06	5.9142e-05	4.84891e-05	1656	tags=83%, list=9%, signal=76%	26354/7203/10576/6950/908/10575/22948/10694/10574/1736
GO:0042692	BP	muscle cell differentiation	352	0.510173	1.25283	1.20645e-06	5.99124e-05	4.91207e-05	6343	tags=51%, list=33%, signal=34%	22943/84700/1311/50804/3479/2255/150921/221476/4842/124857/4629/287/88/92304/284612/577/10290/8516/7345/25802/93649/7140/6261/11155/22953/7111/348093/84665/5239/23363/93166/2318/844/64208/575/6910/4856/3815/6608/9096/148/1000/92737/101929726/2852/183/58494/221662/51725/51676/11149/26585/1756/4868/5156/57538/84814/6444/79191/5915/54361/338773/4703/51778/3756/89/23345/90342/80206/3488/10398/3481/19…
GO:0015844	BP	monoamine transport	82	0.631457	1.48278	1.22356e-06	6.03752e-05	4.95002e-05	5709	tags=76%, list=30%, signal=53%	1268/3745/1113/4842/6623/6860/7432/84258/341359/6861/143425/1813/150/5865/1133/183/6857/4986/5023/4129/3356/6622/1137/9607/222962/3737/3351/5020/6530/6570/1141/26281/51760/6581/6531/148281/8973/2668/1812/91683/152/83849/6532/6387/23208/6571/5021/5028/5071/2550/151/3690/1392/2824/135/2865/2912/9066/3350/1815/11255/127833
GO:0015872	BP	dopamine transport	51	0.684306	1.57831	1.2749e-06	6.17288e-05	5.061e-05	3182	tags=65%, list=17%, signal=54%	1268/6623/6860/84258/341359/6861/143425/1813/5865/1133/6857/4986/3356/6622/1137/222962/3737/3351/6530/1141/26281/51760/6581/6531/148281/8973/2668/1812/91683/83849/6387/23208/6571
GO:0035296	BP	regulation of tube diameter	138	0.58185	1.39244	1.2749e-06	6.17288e-05	5.061e-05	5033	tags=58%, list=27%, signal=43%	1311/477/185/6869/4842/4883/2266/155/2837/846/554/6338/148/150/2852/183/3827/3778/5023/3356/154/342527/3351/2243/146/553/10242/3952/4881/1910/1816/1401/1812/3741/59/2244/196740/3363/3779/152/147/6532/796/4313/2982/4879/2303/10800/257313/552/1131/5592/6649/186/5021/5345/5028/551/6640/857/1908/3357/80852/6546/151/1909/59272/3792/59342/27345/2149/4878/4846/153/5997/3274/135/6915/10365/5743
GO:0097746	BP	blood vessel diameter maintenance	138	0.58185	1.39244	1.2749e-06	6.17288e-05	5.061e-05	5033	tags=58%, list=27%, signal=43%	1311/477/185/6869/4842/4883/2266/155/2837/846/554/6338/148/150/2852/183/3827/3778/5023/3356/154/342527/3351/2243/146/553/10242/3952/4881/1910/1816/1401/1812/3741/59/2244/196740/3363/3779/152/147/6532/796/4313/2982/4879/2303/10800/257313/552/1131/5592/6649/186/5021/5345/5028/551/6640/857/1908/3357/80852/6546/151/1909/59272/3792/59342/27345/2149/4878/4846/153/5997/3274/135/6915/10365/5743
GO:0034705	CC	potassium channel complex	89	0.615054	1.44953	1.29201e-06	6.17851e-05	5.06561e-05	4856	tags=65%, list=26%, signal=49%	57628/3745/170850/3787/10021/3755/3776/1804/30820/3773/3736/2901/3788/2899/2898/56479/3739/9312/3778/219527/3746/27012/9992/3763/30818/10060/3737/3780/6833/3756/3751/3754/2900/10242/3750/3741/27094/348980/3779/3757/126755/3738/93107/3748/23415/3790/3747/3752/3743/9132/7881/610/3764/23630/27345/30819/3785/3786
GO:0043270	BP	positive regulation of ion transport	269	0.524833	1.28124	1.29201e-06	6.17851e-05	5.06561e-05	5803	tags=51%, list=31%, signal=36%	5649/5354/1272/27092/486/117/4842/287/88/6331/6860/6330/55800/2147/846/3736/9104/482/10345/22953/6000/799/844/5348/57158/1813/2273/7220/150/5865/2852/183/6857/4986/644139/219527/5023/3746/781/23237/6622/154/1579/2257/1756/9992/10991/6833/5020/65267/4638/342667/553/930/3952/64805/1141/9472/162514/2668/1812/2946/8647/2916/5319/9001/3779/3757/126755/2641/6769/6569/57165/54413/6532/783/30845/7200/638…
GO:0070588	BP	calcium ion transmembrane transport	303	0.518343	1.26941	1.32623e-06	6.30327e-05	5.1679e-05	5733	tags=50%, list=30%, signal=35%	5354/774/27112/477/27092/2903/4842/114780/6366/845/6363/287/259232/59285/6547/2147/2823/6543/5350/491/9104/6261/10345/785/57338/8911/8913/799/3358/844/57158/1813/84502/79054/7220/150/2852/55283/2247/5023/781/3356/6622/80036/57419/779/1394/4988/286097/5587/140803/1756/9992/6236/168507/2814/55799/342667/9254/930/492/773/1910/9472/1236/162514/59284/6263/786/1812/2946/9001/777/8912/6769/57165/783/430…
GO:0086010	BP	membrane depolarization during action potential	35	0.738247	1.66592	1.37757e-06	6.50734e-05	5.33521e-05	4222	tags=77%, list=22%, signal=60%	6327/6332/477/10021/11280/287/6331/6330/55800/8911/6328/8913/6329/6326/781/6335/6334/6323/3757/8912/783/6336/775/6324/6546/610/859
GO:0099565	BP	chemical synaptic transmission, postsynaptic	100	0.600368	1.42229	1.39468e-06	6.54825e-05	5.36875e-05	6169	tags=70%, list=33%, signal=47%	22871/152404/5649/2903/7476/22999/9378/6547/9699/6543/2743/56853/22953/57502/2901/388135/23316/2898/1813/8001/23542/5023/266743/6622/154/4988/1137/124925/50944/120892/4355/1141/66000/1143/8973/2895/84866/9127/54413/1136/869/5999/4208/57555/1742/51738/1142/4923/2741/1145/1144/642938/81832/85358/5026/10458/135/7442/55584/1135/1815/1139/134/1760/1146/18/2742/5024/112755/3060
GO:0071025	BP	RNA surveillance	15	-0.697709	-2.6495	1.49814e-06	6.99161e-05	5.73225e-05	5742	tags=100%, list=30%, signal=70%	54464/5394/55795/118460/1797/53918/56915/51010/6832/54512/5393/23016/23404/11340
GO:0030594	MF	neurotransmitter receptor activity	110	0.592365	1.40842	1.60003e-06	7.42242e-05	6.08547e-05	6217	tags=77%, list=33%, signal=52%	2567/2903/2569/2566/2556/2894/2891/2743/1129/2901/2899/2898/3358/1813/3359/2561/8001/2893/1133/2558/55879/3356/2890/1137/3351/3360/170572/2900/2554/2568/9177/1141/1143/1132/390441/2892/1816/285242/8973/2895/1812/3363/2915/3354/2911/1136/2562/1131/2564/2565/1142/2741/3357/1145/1144/3355/2550/2897/200959/2559/3362/153/3274/2570/1128/2555/3361/55584/3350/2560/284433/1135/1815/89832/1139/11255/219874…
GO:0099003	BP	vesicle-mediated transport in synapse	196	0.545811	1.32284	1.66848e-06	7.69389e-05	6.30803e-05	3692	tags=37%, list=19%, signal=30%	1268/140730/9892/27445/22871/440279/7476/22999/6623/6854/57030/8224/6456/6860/246213/6457/50632/9699/154664/57502/2901/6861/6616/143425/1813/148/29993/1000/150/5865/6857/5023/26059/3356/23237/6622/5217/9900/273/11037/9024/3351/8618/120892/146395/79953/8448/6570/6853/8973/1812/107/9829/91683/320/6517/54413/783/84446/9381/5579/5413/8927/5582/6571/57555/8447/5028/23025/10814/1142/85439/26052
GO:0000940	CC	outer kinetochore	12	-0.740805	-2.48914	1.82063e-06	8.34579e-05	6.84251e-05	535	tags=58%, list=3%, signal=57%	10403/5347/701/891/220134/1063/221150
GO:0051952	BP	regulation of amine transport	91	0.60961	1.43885	1.87451e-06	8.49228e-05	6.96262e-05	3644	tags=57%, list=19%, signal=46%	1268/3745/1113/477/6623/6860/7432/84258/341359/6861/143425/1813/2917/150/5865/183/6857/4986/3356/6622/4889/9900/1137/9607/10991/3737/3351/5020/553/3952/1141/26281/51760/148281/8973/2668/1812/91683/152/83849/1136/7200/6387/552/23208/5999/5021/5028/551/6865/5071/4923
GO:1901890	BP	positive regulation of cell junction assembly	104	0.599852	1.42403	1.87451e-06	8.49228e-05	6.96262e-05	4342	tags=54%, list=23%, signal=42%	57633/26050/22871/6422/347730/22865/7476/4653/9378/149461/84189/577/23768/23316/4915/575/6910/64084/139065/8128/183/1946/5789/11141/94030/84631/79191/54361/4914/5020/7122/114798/158038/79953/2895/10979/54413/7010/869/3273/57555/57463/4867/5021/7162/51738/654429/857/347731/27286/54674/9746/26045/147381/1307/59272
GO:0072006	BP	nephron development	144	0.566186	1.35835	1.9089e-06	8.54812e-05	7.0084e-05	5793	tags=58%, list=31%, signal=41%	9370/80000/54798/2066/1286/1285/28999/2719/84623/9241/10736/2302/7484/6608/5455/183/2247/5979/26585/4868/9863/80310/5156/79191/170690/54361/130497/7021/25937/7477/1910/2138/6943/26249/284/5076/2668/59/2737/7471/2303/7010/7482/9788/79192/655/186/4208/26508/7475/7827/8710/8642/8842/5087/30812/3237/9500/5311/6299/7490/1909/7481/6469/3911/5175/4811/3570/1958/4854/2246/51804/947/4853/5727/5159/4070/65…
GO:0032412	BP	regulation of ion transmembrane transporter activity	245	0.528969	1.2886	1.9089e-06	8.54812e-05	7.0084e-05	5754	tags=51%, list=30%, signal=36%	6327/22871/5649/3787/477/27092/486/4842/3755/845/287/88/6330/55800/729993/3736/5350/9104/482/10345/785/3788/57338/844/5348/57158/1813/84502/2273/2259/150/388336/23542/440829/644139/219527/3746/781/23237/154/1394/2257/4988/1756/9992/53826/6236/2258/130497/6833/65267/50944/23072/342667/146395/1393/53822/9472/59284/2946/9001/126755/2915/6769/54413/783/30845/2281/1131/53828/4208/5174/57555/57463/1263…
GO:2001257	BP	regulation of cation channel activity	163	0.559291	1.34825	2.08087e-06	9.21171e-05	7.55246e-05	5913	tags=60%, list=31%, signal=42%	22871/5649/3787/27092/4842/3755/845/287/88/729993/3736/5350/10345/785/3788/57338/844/57158/1813/84502/2259/388336/23542/440829/644139/219527/3746/781/23237/154/1394/2257/4988/1756/9992/6236/2258/6833/50944/342667/146395/1393/9472/59284/2946/9001/126755/6769/54413/783/30845/2281/4208/57555/57463/126306/1742/2669/3270/23704/51083/857/3747/4923/4987/1612/1193/144245/10681/27091/7881/10368/729230/531…
GO:0007389	BP	pattern specification process	455	0.496238	1.22366	2.08087e-06	9.21171e-05	7.55246e-05	6292	tags=50%, list=33%, signal=34%	64388/22943/2348/5649/64399/128344/6422/8854/3226/7476/2066/2255/7704/7545/53820/57453/6496/4223/367/2719/10718/7092/163589/9241/6423/121643/10736/658/92749/2302/2735/140628/25928/3211/6092/57216/5100/9464/6910/5308/8646/4920/145258/6608/9096/4909/4036/83538/55130/25806/164781/4760/2247/126668/718/79659/23237/56165/4222/9573/51676/429/2018/26585/3201/653/56033/199221/64446/80114/2019/79191/168507…
GO:0044304	CC	main axon	60	0.644774	1.49684	2.11526e-06	9.31076e-05	7.63367e-05	5225	tags=68%, list=28%, signal=50%	4653/6900/3736/10382/6092/23114/400746/3739/6326/1261/4099/6506/3746/4137/114131/4133/1740/6334/3737/7122/6323/1393/4130/8506/57731/57165/4131/1742/80128/3747/6324/6695/2550/7881/23136/57554/3785/3786/135/4897/89796
GO:0072562	CC	blood microparticle	113	0.589301	1.40242	2.18405e-06	9.55923e-05	7.83738e-05	4714	tags=56%, list=25%, signal=42%	7018/335/337/213/5444/7448/590/12/2638/1356/3240/2266/197/1191/2147/3697/10878/3698/183/5340/3827/3512/718/3848/2162/72/259/5858/5644/2243/721/720/6521/3674/3078/84000/3263/5005/2244/716/2/462/5004/735/3273/5627/70/3075/3700/710/5345/728378/715/1370/3048/173/1/731/58/3250/3306/2934/3046
GO:0043248	BP	proteasome assembly	12	-0.73497	-2.46953	2.24707e-06	9.7798e-05	8.01822e-05	5034	tags=67%, list=27%, signal=49%	51633/5711/84262/5716/23392/389362/51371/8624
GO:0009897	CC	external side of plasma membrane	364	0.503952	1.23859	2.42481e-06	0.000104944	8.60411e-05	6987	tags=59%, list=37%, signal=38%	460/7018/2674/2348/5104/22871/2676/286133/79679/931/2208/5314/6403/165530/2266/1271/2206/2690/388512/2147/2891/933/23627/8516/50489/3977/482/6508/643/2675/973/6338/6340/361/3815/2813/338328/433/79054/4036/911/290/1946/3568/5340/5023/1137/1238/5156/9244/64446/913/2243/9173/10462/4063/4059/974/4684/2159/11086/8515/2352/339390/930/64109/100423062/1141/3674/5270/3953/115650/948/5169/1236/56244/762/35…
GO:0007189	BP	adenylate cyclase-activating G protein-coupled receptor signaling pathway	153	0.560049	1.34647	2.4592e-06	0.000105841	8.67767e-05	6510	tags=69%, list=34%, signal=45%	1268/111/2740/1113/283383/5731/116/23566/1269/7432/155/5733/6954/2695/108/577/5350/5745/4161/799/575/23284/1813/2587/148/150/2852/114131/2849/154/1394/10149/4988/2642/1902/146/23266/5744/27201/118442/2835/4158/1816/576/2774/5737/1812/107/333/2641/152/2692/147/170589/796/797/59350/2492/1901/5196/10267/7253/139378/5732/122042/1903/56246/3973/4987/10266/114/10268/196883/151/84658/493/3375/5739/2696/…
GO:0007193	BP	adenylate cyclase-inhibiting G protein-coupled receptor signaling pathway	76	0.631053	1.47917	2.49359e-06	0.000106729	8.75042e-05	5749	tags=78%, list=30%, signal=54%	4886/768239/111/4883/5064/2913/846/1129/2899/1813/9590/2917/150/1133/2861/4986/2914/9568/4985/4988/5138/3351/1902/3360/64805/1132/2770/2916/2915/2781/3354/2911/1901/1131/5028/1903/2316/4987/3355/11251/4887/2550/2779/1909/11245/4543/165140/6752/5997/2865/1128/3361/2912/3350/2847/1815/11255/1906/134
GO:0035418	BP	protein localization to synapse	67	0.642761	1.49847	2.56238e-06	0.00010907	8.9424e-05	4818	tags=54%, list=25%, signal=40%	27445/22871/5649/4884/347730/22865/9211/2903/7476/9378/158866/9379/6616/3798/4137/5913/1740/4868/23426/50944/4130/10082/59284/51201/3800/8927/160622/57555/1742/80852/9746/27065/10368/10369/10458/58538
GO:0005249	MF	voltage-gated potassium channel activity	90	0.604466	1.42566	2.73435e-06	0.000115754	9.49041e-05	5720	tags=74%, list=30%, signal=52%	3745/170850/3787/10021/3755/343450/3777/3776/3773/3736/3788/6616/56479/3739/9312/27133/23416/3778/219527/3746/131096/27012/9992/3768/3763/10060/3737/3780/6833/3756/3751/3754/3750/3741/348980/3757/126755/3738/81033/51305/93107/3748/23704/23415/3790/90134/3747/3752/3782/3743/9132/7881/610/5311/3764/57582/23630/30819/3785/3786/3765/9196/169522/3749/3769/3761/3758
GO:0017101	CC	aminoacyl-tRNA synthetase multienzyme complex	11	-0.799103	-2.45721	2.83753e-06	0.000118824	9.74206e-05	1712	tags=73%, list=9%, signal=66%	9255/5859/2058/5917/7965/3735/9521/3376
GO:0030900	BP	forebrain development	371	0.504134	1.23937	2.83753e-06	0.000118824	9.74206e-05	5567	tags=42%, list=29%, signal=30%	22943/5649/10642/8854/477/7476/93986/2066/2255/79625/6496/151449/6900/6331/9353/7143/4747/84623/4009/10718/3736/9241/9201/482/886/139411/554/5079/4852/2735/6092/4915/1813/5308/145258/6608/1000/4036/91584/5455/146760/25806/285025/6506/4760/2247/3746/79659/1749/79633/429/2018/238/8941/26038/5122/5915/2258/54361/1600/220/120892/431707/1638/1996/6343/50674/4808/64805/7477/1141/66000/89927/2736/2290/9…
GO:0051965	BP	positive regulation of synapse assembly	62	0.65145	1.51405	2.87193e-06	0.000119617	9.80714e-05	4152	tags=66%, list=22%, signal=52%	57633/26050/22871/347730/22865/7476/9378/84189/577/23768/23316/4915/575/64084/139065/8128/1946/5789/11141/94030/84631/4914/5020/114798/158038/79953/2895/54413/869/57555/57463/5021/7162/51738/654429/347731/27286/54674/9746/26045/147381
GO:0022898	BP	regulation of transmembrane transporter activity	255	0.522806	1.27488	2.94071e-06	0.000121827	9.98833e-05	5754	tags=50%, list=30%, signal=35%	6327/22871/5649/3787/477/27092/486/4842/3755/845/287/88/6330/55800/729993/3736/5350/9104/482/10345/785/3788/57338/844/5348/57158/1813/84502/2273/2259/150/388336/23542/440829/644139/219527/3746/781/23237/6622/154/1394/2257/4988/1756/9992/53826/6236/2258/130497/6833/65267/50944/23072/342667/146395/1393/53822/9472/59284/2946/9001/126755/2915/6769/54413/783/30845/2281/1131/53828/148811/4208/5174/5755…
GO:0048738	BP	cardiac muscle tissue development	213	0.537407	1.30461	3.14708e-06	0.000128997	0.000105761	5702	tags=50%, list=30%, signal=35%	22943/84700/8854/10021/2066/3479/221476/5950/4629/88/6331/4634/3776/9241/5350/6445/93649/23414/2735/140628/8913/23363/57158/7134/10804/6910/9096/148/4036/183/2247/26011/51676/11149/26585/653/5156/57538/6444/79191/5915/4703/80206/26281/2254/8470/9472/4607/84525/65009/3084/91807/6474/4879/2303/1901/7042/70/5999/27063/3670/655/4892/4208/57493/6262/7273/57057/55553/7478/137868/7139/8324/6546/129446/7…
GO:0032409	BP	regulation of transporter activity	272	0.517983	1.26499	3.14708e-06	0.000128997	0.000105761	4586	tags=42%, list=24%, signal=32%	9370/6327/22871/5649/3787/477/27092/486/5444/4842/3755/845/287/88/6330/55800/729993/3736/5350/9104/482/10345/785/3788/57338/844/5348/57158/1813/84502/2273/2259/150/388336/23542/440829/644139/219527/3746/781/23237/6622/115584/154/1394/2257/4988/1756/9992/53826/6236/2258/130497/6833/65267/50944/23072/342667/146395/1393/53822/9472/59284/2946/9001/126755/2915/6769/54413/783/30845/2281/1131/53828/1011…
GO:0070382	CC	exocytic vesicle	214	0.532503	1.2929	3.38784e-06	0.000138135	0.000113253	4589	tags=40%, list=24%, signal=30%	9892/440279/115827/2903/3479/5179/203190/6854/57030/8224/6860/246213/84623/284612/84258/9145/9899/341359/9627/6861/6616/55530/143425/24141/1813/2572/114088/4909/22987/5865/6857/4986/7781/525/6622/2890/4985/9900/273/1809/11037/94122/142684/6833/4803/22895/81615/120892/79953/8448/7732/6570/6853/51760/148281/9001/9162/83992/91683/201294/320/83849/84446/5802/9381/5413/132204/8927/23208/6571/51305/174…
GO:0007611	BP	learning or memory	263	0.523016	1.2762	3.56015e-06	0.00014421	0.000118234	4007	tags=39%, list=21%, signal=31%	1268/22943/64478/5649/4593/2740/477/6869/2903/590/6900/22986/9378/54112/3776/6860/7432/7143/5803/6547/57144/4009/2695/6543/577/8516/9379/139411/57502/57338/6616/23316/1620/4915/1813/84502/3815/4909/23542/183/6326/4986/2558/9369/266743/4137/3356/23237/2334/2890/5577/2019/5153/2258/4914/6833/5020/4803/7122/50944/431707/1996/1393/1141/4130/5176/1816/9486/7436/10882/1812/65009/107/164312/4776/2915/87…
GO:2000105	BP	positive regulation of DNA-templated DNA replication	14	-0.714671	-2.64305	3.57406e-06	0.00014421	0.000118234	583	tags=57%, list=3%, signal=55%	6742/30968/8317/79733/2021/10926/144455/81620
GO:0007612	BP	learning	145	0.565702	1.35777	3.76753e-06	0.000149677	0.000122717	3693	tags=42%, list=19%, signal=34%	22943/64478/5649/477/6869/2903/590/6900/22986/9378/54112/7143/6547/57144/6543/577/9379/57502/57338/6616/4915/1813/84502/3815/23542/183/4986/2558/9369/266743/23237/5577/2019/5153/2258/6833/7122/50944/1996/1141/4130/1816/9486/10882/1812/65009/164312/2915/54413/84446/23208/5764/1742/7162/25769/338811/6865/5071/4923/143941/4987
GO:0015276	MF	ligand-gated ion channel activity	145	0.565375	1.35699	3.76753e-06	0.000149677	0.000122717	6217	tags=70%, list=33%, signal=47%	10021/2567/2903/2569/2566/2556/2894/2891/3773/2743/6261/22953/2901/2899/2898/54714/6338/6340/1258/3359/2561/79054/8001/2893/55283/2558/1261/55879/5023/2890/1137/9992/3768/3763/10060/3780/6833/51555/170572/2900/2554/2568/9177/1141/1143/2892/285242/8973/2895/6263/9127/348980/3757/55515/81033/9635/1136/2562/2281/2564/2565/3708/6262/1142/90134/2741/1145/3782/1144/610/2897/5311/200959/3764/2559/5026/5…
GO:0022834	MF	ligand-gated channel activity	145	0.565375	1.35699	3.76753e-06	0.000149677	0.000122717	6217	tags=70%, list=33%, signal=47%	10021/2567/2903/2569/2566/2556/2894/2891/3773/2743/6261/22953/2901/2899/2898/54714/6338/6340/1258/3359/2561/79054/8001/2893/55283/2558/1261/55879/5023/2890/1137/9992/3768/3763/10060/3780/6833/51555/170572/2900/2554/2568/9177/1141/1143/2892/285242/8973/2895/6263/9127/348980/3757/55515/81033/9635/1136/2562/2281/2564/2565/3708/6262/1142/90134/2741/1145/3782/1144/610/2897/5311/200959/3764/2559/5026/5…
GO:0070202	BP	regulation of establishment of protein localization to chromosome	12	-0.720103	-2.41958	3.92295e-06	0.000155057	0.000127127	1538	tags=75%, list=8%, signal=69%	7203/10576/6950/908/10575/22948/10694/10574/1736
GO:0050806	BP	positive regulation of synaptic transmission	147	0.56365	1.35314	3.97491e-06	0.000156313	0.000128157	4268	tags=47%, list=23%, signal=37%	1268/22871/152404/5649/10590/347730/9211/6869/27092/2903/22999/9378/7143/6547/1395/9699/2695/6543/6616/2898/4915/1813/64084/4920/148/11170/2852/6857/3908/5913/23237/6622/10858/4914/5020/2670/4355/5270/59284/51201/1812/107/9001/4776/2043/91683/7101/54413/783/1524/5582/5764/57555/8938/1742/5021/25769/57616/794/6865/760/9746/114/26045/27091/27065/10368/729230/729956
GO:0051966	BP	regulation of synaptic transmission, glutamatergic	69	0.635719	1.48544	4.25142e-06	0.000166342	0.00013638	4144	tags=59%, list=22%, signal=47%	1268/22943/22871/5649/477/27092/9378/7143/2913/2899/2898/1813/4920/2917/1000/23542/6857/2914/3356/3351/4914/120892/5270/9890/59284/1812/2916/9162/2915/54413/2911/4208/57555/5021/57616/23025/27185/27091/2897/10368/729230
GO:0090646	BP	mitochondrial tRNA processing	12	-0.71639	-2.4071	4.4504e-06	0.000173252	0.000142046	5386	tags=100%, list=28%, signal=72%	55006/54802/51654/60528/9692/54931/84881/51095/80324/57570/3028
GO:0003341	BP	cilium movement	185	0.545923	1.32076	4.59705e-06	0.000178067	0.000145993	6513	tags=62%, list=34%, signal=41%	338/6869/200162/200373/89876/54768/84229/54514/9104/27285/92749/8911/480/79740/361/22873/8382/83538/55130/1672/79864/144535/1770/164781/257062/26256/401024/79582/64446/81492/387712/203074/79645/160762/152015/83894/27019/115948/63978/51314/8701/9148/154313/55811/5360/147700/152110/83853/57119/6870/117144/348807/164714/85413/255101/246176/126820/221481/64518/144406/11189/79925/56171/123872/6865/255…
GO:0042562	MF	hormone binding	87	0.605135	1.42468	4.66618e-06	0.000179845	0.000147451	3865	tags=51%, list=20%, signal=40%	887/6344/2740/7434/7276/477/117/4883/5746/9340/367/2690/1395/269/886/5745/2862/4161/799/2587/4036/2852/7068/1394/2642/220/553/1393/4881/1910/3953/1428/3061/2692/59350/2908/552/10267/2825/5021/3973/478/216/10266
GO:0009113	BP	purine nucleobase biosynthetic process	10	-0.819301	-2.51184	4.77104e-06	0.000182977	0.000150018	1487	tags=90%, list=8%, signal=83%	2618/353/8833/6470/100/5471/6472/3251/10606
GO:0014706	BP	striated muscle tissue development	227	0.529836	1.28858	4.94269e-06	0.000188626	0.00015465	5831	tags=50%, list=31%, signal=35%	22943/84700/8854/10021/2066/3479/221476/5950/4629/88/2139/6331/4634/3776/9241/5350/6445/93649/23414/2735/140628/8913/5239/23363/57158/7134/10804/6910/9096/148/4036/183/2247/26011/51676/11149/26585/653/5156/57538/6444/79191/5915/4703/80206/26281/2138/2254/8470/9472/4607/84525/65009/3084/91807/6665/6474/4879/2303/1901/7042/70/5999/27063/3670/655/4892/4208/57493/6262/7273/57057/55553/7478/137868/713…
GO:0099061	CC	integral component of postsynaptic density membrane	51	0.669587	1.54436	5.35745e-06	0.000202924	0.000166373	4586	tags=73%, list=24%, signal=55%	22865/27092/2903/2066/2045/22986/729993/2894/145581/57689/491/2901/64084/150/388336/57497/1630/1949/2890/4985/94030/114798/146395/9890/59284/2895/107/5802/347731/53616/9746/26045/10368/64101/81832/57622/10369
GO:1904872	BP	regulation of telomerase RNA localization to Cajal body	18	-0.618241	-2.76073	5.36975e-06	0.000202924	0.000166373	1538	tags=56%, list=8%, signal=51%	7203/10576/6950/908/10575/22948/10694/55651/10574/1736
GO:0005272	MF	sodium channel activity	46	0.680211	1.55826	5.49571e-06	0.000206676	0.000169449	4148	tags=65%, list=22%, signal=51%	6327/6332/10021/11280/6331/6330/259232/55800/2901/2899/8911/6328/8913/2898/6329/6338/6340/6326/6335/6334/6323/2900/348980/8912/55515/6336/6324/610/2897/5311
GO:1902969	BP	mitotic DNA replication	14	-0.702723	-2.59887	5.7769e-06	0.000216201	0.000177258	1149	tags=79%, list=6%, signal=74%	5422/3978/4171/4175/675/4172/5888/8318/64785/9837/4173
GO:0016079	BP	synaptic vesicle exocytosis	106	0.590219	1.40191	5.84135e-06	0.000217562	0.000178374	3593	tags=41%, list=19%, signal=33%	1268/140730/27445/22871/440279/7476/22999/6860/9699/2901/6861/6616/143425/1813/148/150/6857/5023/26059/3356/6622/5217/9900/3351/8618/120892/8448/6853/8973/1812/107/91683/320/783/9381/5579/5413/5582/8447/5028/23025/10814/1142
GO:0060402	BP	calcium ion transport into cytosol	165	0.547083	1.31935	6.18698e-06	0.000229333	0.000188024	4779	tags=48%, list=25%, signal=37%	774/27112/477/931/2903/117/4842/6366/845/6363/287/6547/2147/6543/5350/6261/10345/22953/57338/799/3358/844/57158/1813/84502/148/7220/2852/55283/2247/5023/781/3356/6622/779/5587/1756/2814/930/773/9472/1236/162514/6263/1812/2946/5319/9001/777/4308/2281/728215/2815/3708/9002/126306/775/123041/25769/3270/6262/857/4923/3357/1193/7222/6546/2829/2811/5311/187/10268/55503/59341/6375/387129/493/5026/2149/2…
GO:1904814	BP	regulation of protein localization to chromosome, telomeric region	14	-0.697701	-2.58029	6.3797e-06	0.000234773	0.000192485	1656	tags=79%, list=9%, signal=72%	26354/7203/10576/9555/6950/908/10575/22948/10694/10574/1736
GO:1901888	BP	regulation of cell junction assembly	197	0.539282	1.30702	6.39437e-06	0.000234773	0.000192485	5289	tags=49%, list=28%, signal=36%	22943/57633/347/26050/22871/4593/4884/4916/6422/347730/22865/7476/4653/2045/9378/149461/84189/145581/577/23768/257194/26280/23316/6092/4915/575/6910/64084/139065/11170/8128/183/1946/6622/5789/11141/26585/94030/84631/2042/9423/79191/54361/375323/4914/5020/7122/90102/114798/158038/151306/79953/1141/10082/2895/10979/54413/395/6585/7010/266727/869/3273/8292/4208/57555/57463/4867/5021/7162/51738/65442…
GO:0051899	BP	membrane depolarization	81	0.60586	1.42197	7.15545e-06	0.000261478	0.000214379	4643	tags=53%, list=24%, signal=40%	6327/6332/477/10021/4653/11280/287/6331/6330/55800/8911/6328/8913/6329/6910/2273/1258/6326/781/6335/1137/6334/1634/6323/120892/1141/8973/348980/3757/8912/783/6336/775/8326/857/4923/6324/6546/610/859/10962/10369/54831
GO:0030414	MF	peptidase inhibitor activity	180	0.543267	1.31339	7.29439e-06	0.000262835	0.000215492	5333	tags=53%, list=28%, signal=38%	10406/5104/27344/1470/4057/221476/12/124857/7980/3699/1285/5267/197/2719/866/347365/3697/1474/6691/89932/3698/80760/50859/27151/183/3827/144568/718/6622/4018/11005/259/327657/5858/721/5275/59082/4803/51156/1473/199713/8434/153218/720/5270/6317/5176/7078/51050/284293/2/462/7077/7035/57119/3273/5627/3700/3053/8710/135228/58189/710/6690/5345/9806/551/26998/939/6318/6695/5054/5273/128821/5276/164237/…
GO:0006937	BP	regulation of muscle contraction	160	0.544222	1.31064	7.29439e-06	0.000262835	0.000215492	6232	tags=58%, list=33%, signal=39%	1113/477/10021/6869/4842/845/287/6331/4634/6547/3736/1129/5350/93649/7140/6329/844/7134/80763/3815/1264/148/9312/150/2852/3778/5023/154/29119/1756/2258/5020/89/56923/10398/1143/4607/2946/152/147/796/6336/2982/30845/1136/6870/2281/1131/5592/5021/775/3270/51738/6262/6865/857/5294/7139/1193/4660/6546/7137/1490/51086/859/151/59272/390594/59341/388428/6752/7138/2149/4878/5997/6915/5743/3164/7125/8654/…
GO:0090066	BP	regulation of anatomical structure size	481	0.486382	1.19981	7.29439e-06	0.000262835	0.000215492	5492	tags=41%, list=29%, signal=30%	9723/343578/6344/223117/1311/477/185/6869/7476/2045/4842/119/4883/6366/10178/23105/23566/6900/5063/88/8153/2266/9353/2006/7143/4747/155/2837/846/1382/25802/3897/130271/554/7111/57611/1826/79822/6338/7484/361/148/150/5865/91584/2852/183/1946/3827/4099/3778/5023/4137/1630/3356/6559/5217/4133/154/163782/342527/5979/4868/9423/2258/3351/2243/4703/65267/4803/146/120892/80206/6343/553/23500/10242/3952/7…
GO:0042559	BP	pteridine-containing compound biosynthetic process	14	-0.693428	-2.56449	7.48482e-06	0.000268449	0.000220095	879	tags=64%, list=5%, signal=61%	5860/2356/5092/25902/471/1719/6697/2643/4522
GO:0016247	MF	channel regulator activity	140	0.563275	1.34902	7.7112e-06	0.000275293	0.000225706	4693	tags=48%, list=25%, signal=36%	6327/57628/3787/27092/486/51440/4842/9378/6330/59285/1804/55800/30820/2913/9379/4852/5348/2259/219527/154/27012/2257/9992/259/30818/53826/6236/2258/10060/65267/53822/10242/59284/2822/786/27094/3779/126755/57010/5579/2281/5592/53828/10110/3708/57463/2669/6640/23704/360226/857/3790/6324/2316/4887/7137/27091/7881/10368/859/23630/28954/493/10369/7809/27345/30819
GO:0001522	BP	pseudouridine synthesis	18	-0.607477	-2.71266	7.79216e-06	0.000276908	0.00022703	7453	tags=94%, list=39%, signal=57%	115939/126789/83480/83448/55505/285367/142940/92345/84881/27079/80324/26995/54517/113000/55651/54433/1736
GO:0000177	CC	cytoplasmic exosome (RNase complex)	13	-0.709196	-2.52524	8.04365e-06	0.00028454	0.000233287	5523	tags=92%, list=29%, signal=65%	118460/22894/87178/115752/56915/51010/6832/54512/5393/23016/23404/11340
GO:0005248	MF	voltage-gated sodium channel activity	24	0.769265	1.69019	8.16062e-06	0.000287365	0.000235604	4148	tags=92%, list=22%, signal=72%	6327/6332/10021/11280/6331/6330/259232/55800/8911/6328/8913/6329/6326/6335/6334/6323/348980/8912/6336/6324/610/5311
GO:0099106	MF	ion channel regulator activity	135	0.564749	1.35037	8.54482e-06	0.000298267	0.000244542	5547	tags=53%, list=29%, signal=37%	6327/57628/3787/27092/486/51440/4842/9378/6330/59285/1804/55800/30820/2913/9379/4852/5348/2259/219527/154/27012/2257/9992/259/30818/53826/6236/2258/10060/65267/53822/10242/59284/2822/786/27094/3779/126755/57010/5579/2281/5592/53828/10110/3708/57463/2669/6640/23704/360226/857/3790/6324/2316/4887/7137/7881/859/23630/28954/493/7809/27345/30819/7442/9196/2912/64699/167/1815/1139
GO:0070203	BP	regulation of establishment of protein localization to telomere	11	-0.773528	-2.37857	8.54721e-06	0.000298267	0.000244542	1538	tags=82%, list=8%, signal=75%	7203/10576/6950/908/10575/22948/10694/10574/1736
GO:0034754	BP	cellular hormone metabolic process	136	0.558757	1.3367	8.96163e-06	0.000311326	0.000255249	6005	tags=57%, list=32%, signal=39%	125/9227/8854/7276/1381/1583/5950/126/1586/1545/10720/1559/1382/127/1646/174/124/6338/339761/1589/54905/10858/195814/654/1543/653/5156/145226/6718/54361/2099/220/6121/54658/1910/8630/7366/9486/54577/7363/1558/8912/438/441282/57016/1544/340665/1645/3294/6716/131/5406/5947/216/1562/1588/1592/6469/231/3284/59342/50700/3283/1958/83875/54576/10170/3991/650/1601/27122/1551/3293/1576/1585/158835/1584/92…
GO:0045666	BP	positive regulation of neuron differentiation	84	0.608727	1.43113	9.10057e-06	0.000314742	0.000258049	3579	tags=48%, list=19%, signal=39%	22943/4674/151449/339479/6457/392255/1620/375567/221336/90527/4760/57795/429/654/79191/1600/221938/8929/4803/51704/5121/50674/7732/8200/2260/79727/26281/2290/9638/152/402117/6935/4131/6387/655/4208/26508/6925/3232/7224
GO:0001731	BP	formation of translation preinitiation complex	11	-0.768342	-2.36262	9.34229e-06	0.000321665	0.000263726	4401	tags=100%, list=23%, signal=77%	1983/1939/54505/1975/23521/8562/7458/1968/8894/28985
GO:0046933	MF	proton-transporting ATP synthase activity, rotational mechanism	14	-0.684544	-2.53164	9.49414e-06	0.000325447	0.000266826	2409	tags=71%, list=13%, signal=62%	10632/10476/539/9551/515/509/498/521/513/506
GO:0031091	CC	platelet alpha granule	91	0.59379	1.40151	9.93419e-06	0.000339032	0.000277964	4788	tags=54%, list=25%, signal=40%	5104/213/3479/7044/12/22915/6403/88/2266/1950/197/1191/2277/5340/2153/3827/6622/2162/2243/3674/3481/5270/3671/948/3082/5005/2244/2/5196/7042/5004/3273/5627/5099/135228/710/5345/340205/7057/5054/2157/1/1675/7450/7424/5175/7043/3690/7058
GO:1904064	BP	positive regulation of cation transmembrane transport	145	0.557018	1.33693	1.02121e-05	0.000346986	0.000284486	4749	tags=50%, list=25%, signal=38%	5649/5354/27092/486/4842/287/88/2147/3736/9104/482/10345/6000/799/844/5348/57158/7220/2852/183/4986/644139/219527/5023/3746/781/23237/6622/154/1756/9992/6833/65267/342667/930/9472/1812/2946/9001/3779/3757/126755/6769/57165/54413/783/30845/5174/9002/57463/6262/51083/3747/4923/2316/1908/144245/10368/729230/5311/187/10268/1909/59272/85358/6375/387129/23630/3306/10369/30819/2149/4878
GO:0060079	BP	excitatory postsynaptic potential	94	0.598505	1.41386	1.04899e-05	0.000353329	0.000289686	3828	tags=52%, list=20%, signal=42%	22871/152404/5649/2903/7476/22999/9378/6547/9699/6543/2743/56853/22953/57502/2901/23316/2898/1813/8001/23542/5023/266743/6622/154/4988/1137/124925/50944/120892/4355/1141/66000/1143/8973/2895/84866/9127/54413/1136/869/5999/4208/57555/1742/51738/1142/2741/1145/1144
GO:0008083	MF	growth factor activity	162	0.54792	1.32001	1.04899e-05	0.000353329	0.000289686	5989	tags=57%, list=32%, signal=39%	22943/4969/651/7060/3479/7044/2255/2662/3623/7031/151449/1950/392255/2147/9542/7066/10718/2202/8190/2277/4856/2252/2259/4909/183/2247/84432/9573/654/2257/653/80310/145957/9965/2258/50810/4803/8200/26281/3481/2254/8817/3626/3082/2668/146433/8823/3084/8838/7042/2688/6387/5764/655/8909/4838/258/56034/2069/83729/1490/3625/3593/7424/3558/23529/10637/8074/6320/7043/51816/2246/3565/3567/6998/2660/27006/…
GO:0008076	CC	voltage-gated potassium channel complex	79	0.611287	1.43467	1.06289e-05	0.000356459	0.000292252	4856	tags=66%, list=26%, signal=49%	57628/3745/170850/3787/10021/3755/3776/1804/30820/3773/3736/3788/56479/3739/9312/3778/219527/3746/27012/9992/3763/30818/3737/3780/3756/3751/3754/10242/3750/3741/27094/348980/3779/3757/126755/3738/93107/3748/23415/3790/3747/3752/3743/9132/7881/610/3764/23630/27345/30819/3785/3786
GO:0008037	BP	cell recognition	155	0.553208	1.3301	1.18793e-05	0.000396677	0.000325226	5413	tags=55%, list=29%, signal=40%	1268/128434/2348/7275/3929/57453/1047/6366/6363/63923/55118/6900/2596/79937/56130/6092/84665/1826/575/152330/81035/54742/7455/78989/1949/4685/23705/2042/49/4692/721/203074/5322/56141/246777/27255/2352/100423062/948/1236/2290/1401/3543/2043/4978/10332/259197/7287/22917/11055/57463/7852/26998/2350/375033/283471/5806/6091/390243/91624/10371/64221/1462/50863/203102/2219/148229/725/2515/284359/5175/41…
GO:0046928	BP	regulation of neurotransmitter secretion	85	0.60213	1.41595	1.20183e-05	0.000399594	0.000327618	3636	tags=46%, list=19%, signal=37%	1268/140730/22871/7476/22999/6623/6860/9627/1813/148/150/2852/6857/5023/3356/6622/5217/3351/120892/6853/1143/8973/1812/107/91683/320/783/5579/5413/1136/23208/5582/4208/8938/5028/6865/10814/1142/5071
GO:0001518	CC	voltage-gated sodium channel complex	17	0.813544	1.72396	1.31885e-05	0.000436048	0.000357505	2912	tags=94%, list=15%, signal=80%	6327/6332/11280/6331/6330/55800/8911/6328/8913/6329/6326/6335/6334/6323/8912/6336
GO:0050905	BP	neuromuscular process	151	0.552235	1.32667	1.32687e-05	0.000436048	0.000357505	4944	tags=49%, list=26%, signal=37%	64478/111/1311/3226/2903/5179/9378/54112/7143/4747/84189/65217/6547/64072/3736/7345/2743/7140/57338/9543/6329/844/7134/1813/84502/54715/124590/23336/429/2257/1756/51761/89/220/50944/6323/4626/342667/4130/6531/2895/8506/1812/2946/23111/6939/3198/3236/6769/1496/340784/3708/57555/2636/126306/1742/57152/441027/5071/2741/1144/7137/5457/859/1909/390594/23621/388428/92241/7138/2307/112476/135/4861
GO:0071027	BP	nuclear RNA surveillance	13	-0.697635	-2.48408	1.33398e-05	0.000436048	0.000357505	5742	tags=100%, list=30%, signal=70%	54464/5394/55795/118460/1797/56915/51010/54512/5393/23016/23404/11340
GO:0071028	BP	nuclear mRNA surveillance	13	-0.697635	-2.48408	1.33398e-05	0.000436048	0.000357505	5742	tags=100%, list=30%, signal=70%	54464/5394/55795/118460/1797/56915/51010/54512/5393/23016/23404/11340
GO:0060401	BP	cytosolic calcium ion transport	184	0.53848	1.30264	1.35466e-05	0.000439102	0.000360009	4779	tags=45%, list=25%, signal=34%	774/27112/477/931/2903/117/4842/6366/845/6363/287/6547/2147/6543/5350/6261/10345/22953/57338/799/3358/844/57158/1813/84502/148/7220/2852/55283/2247/5023/781/3356/6622/779/286097/5587/1756/2814/930/492/773/9472/1236/162514/6263/1812/2946/5319/9001/777/4308/2281/728215/2815/3708/9002/126306/775/123041/25769/3270/6262/857/4923/3357/1193/7222/6546/2829/1490/2811/5311/187/10268/55503/59341/6375/387129…
GO:0034767	BP	positive regulation of ion transmembrane transport	160	0.540636	1.30201	1.35466e-05	0.000439102	0.000360009	4749	tags=47%, list=25%, signal=35%	5649/5354/27092/486/4842/287/88/2147/3736/9104/482/10345/6000/799/844/5348/57158/7220/2852/183/4986/644139/219527/5023/3746/781/23237/6622/154/1756/9992/6833/65267/342667/930/9472/1812/2946/9001/3779/3757/126755/6769/6569/57165/54413/783/30845/5174/9002/57463/6262/51083/5243/3747/4923/2316/1908/144245/10368/729230/5311/187/10268/1909/59272/85358/6375/387129/23630/3306/10369/30819/2149/4878
GO:0090092	BP	regulation of transmembrane receptor protein serine/threonine kinase signaling pathway	253	0.518469	1.2642	1.38245e-05	0.000446242	0.000365863	5796	tags=46%, list=31%, signal=33%	3175/91851/64388/22943/23089/168002/2348/3547/651/1149/6422/6425/8483/7044/2255/2662/3623/124857/6424/151449/222223/56963/2719/392255/494470/8516/9241/6423/93649/25928/348093/375567/8646/4856/4036/9573/23090/654/26585/9863/653/1761/7021/168667/222663/8200/9856/65997/2254/4052/3626/1028/23111/7471/10272/10468/402117/6935/2201/7042/164656/7041/8425/2200/655/753/114990/81031/858/54756/135228/11030/3…
GO:0008509	MF	anion transmembrane transporter activity	311	0.506369	1.2407	1.41023e-05	0.000453323	0.000371668	5893	tags=47%, list=31%, signal=33%	28965/203859/56301/6528/2567/1811/63982/2569/57030/2566/2556/9058/389015/84889/246213/6538/353189/1188/1179/284111/6542/114571/11095/2743/6512/11136/6508/6514/115111/4948/5348/2561/9194/8001/1187/6579/2558/6506/55879/6519/6559/57419/6540/144195/160728/10060/10991/8671/115019/6578/121601/10864/53919/6511/56923/2554/2568/54102/266675/6530/6570/6521/153201/375611/6557/9376/948/64849/6581/6531/10599/…
GO:0008344	BP	adult locomotory behavior	76	0.614862	1.44122	1.49401e-05	0.000478267	0.00039212	3761	tags=47%, list=20%, signal=38%	477/7545/6623/6900/84189/2695/7345/2743/7111/340990/1813/4909/10752/6622/1949/4985/2257/80243/124925/2019/1600/6323/2668/1812/2043/57731/3236/163175/58524/7200/6387/57555/2636/5071/4923/2741
GO:0051588	BP	regulation of neurotransmitter transport	98	0.586771	1.3885	1.52193e-05	0.000485202	0.000397805	3636	tags=45%, list=19%, signal=36%	1268/140730/22871/477/7476/22999/4842/6623/6860/9627/1813/148/150/5865/2852/6857/5023/3356/6622/5217/3351/120892/6853/2670/1143/8973/2668/1812/107/91683/320/783/5579/5413/1136/23208/5582/4208/8938/5028/6865/10814/1142/5071
GO:0090287	BP	regulation of cellular response to growth factor stimulus	285	0.506498	1.23794	1.77325e-05	0.000563008	0.000461596	5796	tags=47%, list=31%, signal=33%	3175/91851/64388/22943/23089/2348/64399/1149/4804/6422/6425/2255/7448/124857/6424/222223/9353/56963/2719/494470/8516/9241/6423/93649/25928/348093/375567/8646/4036/183/2247/9573/387914/23090/26585/54361/1634/7021/168667/222663/80199/8200/2260/66000/65997/2254/57556/64094/8817/4052/55816/1028/63978/8823/23111/7471/10272/10468/402117/5579/6935/2201/164656/9508/3273/7041/8425/2200/753/186/114990/7981…
GO:0004866	MF	endopeptidase inhibitor activity	174	0.537231	1.29731	1.80118e-05	0.00056954	0.000466952	5423	tags=53%, list=29%, signal=38%	10406/5104/27344/1470/4057/12/124857/7980/3699/1285/5267/197/866/347365/3697/1474/6691/89932/3698/80760/50859/27151/183/3827/144568/718/6622/4018/11005/259/327657/5858/721/5275/59082/4803/51156/1473/199713/8434/153218/720/5270/6317/5176/7078/284293/2/462/7077/7035/57119/3273/5627/3700/3053/8710/135228/58189/710/6690/5345/9806/551/26998/939/6318/6695/5054/5273/128821/5276/164237/5918/79444/89778/1…
GO:0050890	BP	cognition	304	0.505572	1.23841	1.85703e-05	0.000584812	0.000479474	4007	tags=37%, list=21%, signal=30%	1268/22943/64478/5649/4593/2740/477/6869/2903/590/6900/22986/9378/54112/3776/6860/7432/7143/5803/6547/57144/4009/2695/6543/577/8516/9379/139411/57502/57338/6616/23316/1620/4915/1813/84502/3815/11170/4909/10752/23542/183/6326/4986/2558/9369/266743/4137/7991/3356/23237/2334/2890/5577/1137/2019/5153/2258/4914/6833/5020/4803/7122/50944/431707/6484/1996/1393/1141/4130/5176/1816/9486/7436/10882/1812/65…
GO:0002027	BP	regulation of heart rate	101	0.578742	1.37164	1.88495e-05	0.000591203	0.000484713	4755	tags=54%, list=25%, signal=41%	6327/10021/845/287/6331/6330/55800/5350/8913/1813/80763/148/183/781/11149/29119/1756/9992/5020/146/1910/3741/3757/57731/147/81033/783/6336/6474/6870/2281/552/5999/3670/186/55328/775/3270/64091/6262/6640/23704/857/6324/1908/3752/10371/6546/4624/51086/859/1909/23630/4878/153
GO:0099054	BP	presynapse assembly	49	0.651683	1.49916	2.02457e-05	0.000632435	0.000518518	5025	tags=65%, list=27%, signal=48%	22943/26050/27445/22871/4916/22865/7476/84189/145581/26280/57502/53942/139065/6622/5789/11141/94030/84631/114798/10082/54413/266727/8927/869/57555/347731/9746/147381/84628/8321/10160/27253
GO:0090257	BP	regulation of muscle system process	226	0.524253	1.27505	2.0525e-05	0.000638583	0.000523559	5749	tags=50%, list=30%, signal=36%	1113/477/10021/6869/3479/221476/4842/845/287/6331/4634/6547/6442/3736/1129/5350/93649/7140/84676/140628/816/6329/844/9464/7134/80763/3815/1264/148/9312/150/2852/183/3778/5152/5023/154/29119/1756/2258/6833/5020/89/56923/3488/10398/1143/9472/4607/2946/90523/152/147/796/6336/2982/30845/1136/6870/2281/1131/5592/5999/5021/775/3270/51738/6262/6865/857/5294/7139/53632/1193/7222/4660/6546/7137/1490/11490…
GO:0098685	CC	Schaffer collateral - CA1 synapse	72	0.617119	1.44474	2.08042e-05	0.000642113	0.000526453	4755	tags=56%, list=25%, signal=42%	22854/7476/2045/6854/7143/4747/57689/9590/9118/5340/57497/1630/5217/5789/4744/50944/146395/6853/347733/107/2043/2915/320/2911/8927/3708/160622/51738/1009/2550/114/26045/10368/5327/64101/6855/10369/84628/10458/153
GO:0006939	BP	smooth muscle contraction	108	0.575079	1.36591	2.08042e-05	0.000642113	0.000526453	6580	tags=70%, list=35%, signal=46%	1311/477/6869/4629/5733/1129/93649/22953/6338/1813/80763/3815/1264/148/9312/322/150/2852/183/3778/5023/3356/154/5020/56923/4638/1141/1910/1143/2668/1812/59/3363/152/10316/796/2982/1136/6870/2281/1131/5592/5021/51738/6865/857/1908/3357/80852/6546/7137/151/1909/493/6752/2149/6909/5997/6915/5743/7442/255743/1906/10203/55959/497189/134/952/143872/18/23213/5024/51196/3352/2693/6525
GO:0004867	MF	serine-type endopeptidase inhibitor activity	96	0.58245	1.37784	2.19212e-05	0.000673904	0.000552518	5423	tags=61%, list=29%, signal=44%	10406/5104/27344/12/124857/7980/3699/5267/866/347365/3697/6691/89932/3698/80760/27151/183/144568/11005/259/327657/5858/5275/51156/8434/153218/5270/6317/5176/284293/2/462/7035/57119/3273/3700/3053/8710/135228/58189/710/6690/5345/6318/6695/5054/5273/5276/164237/89778/140686/5055/643394/280664/27290/6590/1293/646424/5265
GO:0019932	BP	second-messenger-mediated signaling	300	0.50685	1.24042	2.22005e-05	0.000679791	0.000557344	5904	tags=50%, list=31%, signal=35%	6344/2740/477/185/2903/3479/117/4842/79625/845/116/287/6403/55607/55273/933/4880/2695/108/6543/5350/9104/22953/643/9455/3358/844/2981/10900/79054/27115/183/1672/5152/4760/4137/10335/1238/1756/50940/6444/5138/51555/51778/89/10231/120892/5139/3000/56923/6343/118442/64805/4881/1910/948/9472/1236/576/5737/2946/2770/107/345611/4776/1233/58529/3084/2915/2692/10316/5443/10486/151651/1524/2982/4879/51655…
GO:0050433	BP	regulation of catecholamine secretion	55	0.64638	1.49464	2.30382e-05	0.000702666	0.000576099	3636	tags=65%, list=19%, signal=53%	1268/3745/1113/6623/6860/7432/84258/341359/6861/143425/1813/150/183/6857/4986/3356/6622/1137/9607/3737/3351/5020/1141/26281/51760/148281/8973/2668/91683/152/83849/6387/23208/5021/5028/5071
GO:0051146	BP	striated muscle cell differentiation	260	0.512726	1.25088	2.35967e-05	0.000716877	0.000587751	6343	tags=52%, list=33%, signal=35%	22943/84700/50804/3479/221476/4842/4629/88/92304/577/25802/93649/7140/6261/11155/22953/7111/84665/5239/23363/2318/844/64208/575/6910/4856/6608/9096/148/1000/92737/101929726/183/58494/221662/51676/11149/26585/4868/5156/57538/84814/6444/79191/5915/338773/4703/51778/3756/89/90342/80206/3488/10398/3481/8470/9472/84033/84525/8506/30846/79933/58529/284358/3084/8912/7471/91807/150572/9734/6474/9750/1032…
GO:0055001	BP	muscle cell development	172	0.535543	1.29341	2.44345e-05	0.000739429	0.00060624	6275	tags=55%, list=33%, signal=37%	84700/1311/3479/221476/124857/4629/287/88/284612/7345/25802/7140/6261/11155/22953/7111/84665/5239/23363/2318/844/6910/6608/9096/148/92737/183/51676/11149/1756/5156/57538/6444/4703/51778/89/90342/80206/10398/8470/9472/84033/8506/79933/4776/58529/91807/9734/6474/9750/10324/1466/70/5999/27063/3670/4892/30008/858/7273/7480/137868/7139/10266/6546/4624/29767/4656/859/1909/1073/376132/3792/58/7138/51804…
GO:0005230	MF	extracellular ligand-gated ion channel activity	73	0.606875	1.42135	2.58307e-05	0.000776705	0.000636802	6217	tags=79%, list=33%, signal=54%	2567/2903/2569/2566/2556/2894/2891/2743/22953/2901/2899/2898/3359/2561/8001/2893/2558/55879/5023/2890/1137/170572/2900/2554/2568/9177/1141/1143/2892/285242/8973/2895/9127/1136/2562/2564/2565/1142/2741/1145/1144/2897/200959/2559/5026/2570/7442/2555/55584/2560/1135/89832/1139/200909/1146/2742/5024/116444
GO:0099116	BP	tRNA 5'-end processing	16	-0.599124	-2.29077	2.58668e-05	0.000776705	0.000636802	7610	tags=50%, list=40%, signal=30%	10557/10248/54913/10799/54974/3028/10940/138716
GO:0000176	CC	nuclear exosome (RNase complex)	12	-0.659171	-2.21485	2.67669e-05	0.000799861	0.000655787	6470	tags=100%, list=34%, signal=66%	10438/5394/118460/22894/56915/51010/54512/5393/23016/23404/11340
GO:0051932	BP	synaptic transmission, GABAergic	51	0.65031	1.4999	2.69477e-05	0.000799861	0.000655787	4041	tags=59%, list=21%, signal=46%	1268/22871/22865/6869/2567/85445/2566/8224/1269/23349/2556/1813/148/2561/2558/266743/4889/3351/2554/9001/2564/2565/57555/8938/5334/5021/7162/760/9746/23228
GO:0030658	CC	transport vesicle membrane	185	0.533544	1.29081	2.69477e-05	0.000799861	0.000655787	3386	tags=31%, list=18%, signal=26%	2348/440279/10590/115827/169026/6854/57030/8224/6860/246213/6572/284612/84258/9145/9899/1363/341359/6861/55530/143425/9182/4135/24141/1813/2572/22987/29106/5865/359/6857/4986/7781/525/6622/2890/4985/9900/273/6833/22895/81615/120892/79953/8448/6570/6853/148281/762/9162/91683/5802/9381/132204/8927/6571/3708/5798
GO:0017171	MF	serine hydrolase activity	187	0.52766	1.277	2.83439e-05	0.000838093	0.000687133	5792	tags=51%, list=31%, signal=36%	3249/5649/57628/4057/5126/1511/26085/3240/64499/5624/1804/2147/7177/7092/1991/23430/4316/1215/13/162494/5648/3026/2160/5340/4018/5644/5122/49/339967/341277/346702/203074/43/2159/2155/5651/84000/10003/339501/8492/132724/716/11330/4313/10699/10136/164656/25823/63036/440387/8909/28983/51032/715/7093/360226/3003/283471/43849/3817/344805/389208/10942/5657/80975/54504/23436/1675/11012/400668/5327/9407/…
GO:0001764	BP	neuron migration	163	0.54134	1.30498	3.11502e-05	0.000917568	0.000752292	5382	tags=48%, list=28%, signal=35%	460/5649/2676/285313/22854/4916/51473/79625/63923/1641/340533/6900/84623/2823/10718/23768/9201/886/816/137970/4915/23284/1813/92737/10752/346288/1630/429/8941/4139/9423/2258/4692/1600/8929/11023/54328/2260/9856/57556/2290/1812/347733/1233/3084/1496/266727/4131/6387/9620/5592/4208/7852/26468/80128/57057/6695/10371/29967/558/27185/30012/5414/387119/7026/815/2624/84628/343472/6792/8828/2697/4897/897…
GO:1902414	BP	protein localization to cell junction	96	0.578901	1.36944	3.33952e-05	0.000979971	0.000803455	4818	tags=43%, list=25%, signal=32%	27445/22871/5649/4884/347730/22865/9211/2903/7476/9378/158866/9379/84952/6616/3798/4137/5913/1740/4868/23426/50944/4130/10082/59284/83700/51201/10979/3800/8927/160622/57555/1742/57493/80852/9746/27065/10368/5175/10369/10458/58538
GO:0098960	MF	postsynaptic neurotransmitter receptor activity	64	0.620088	1.44297	3.39564e-05	0.000988949	0.000810815	6114	tags=83%, list=32%, signal=56%	2567/2569/2566/2556/2894/2743/1129/2901/2899/2898/1813/2561/1133/2558/2890/1137/2900/2554/1141/1143/1132/2892/1816/8973/2895/1812/2915/2911/1136/1131/2564/2565/1142/2741/1145/1144/2550/2897/2559/153/2570/1128/2555/55584/2560/1135/1815/89832/1139/11255/1146/2742/1814
GO:0008021	CC	synaptic vesicle	196	0.527066	1.27741	3.39564e-05	0.000988949	0.000810815	4589	tags=38%, list=24%, signal=29%	9892/440279/115827/2903/5179/203190/6854/57030/8224/6860/246213/84623/284612/9145/9899/9627/6861/6616/55530/143425/24141/1813/2572/114088/4909/22987/5865/6857/4986/7781/525/6622/2890/4985/9900/273/11037/142684/6833/4803/22895/81615/120892/79953/8448/7732/6570/6853/148281/9001/9162/83992/91683/320/84446/5802/9381/5413/132204/8927/23208/6571/51305/1742/23025/85439/2550/27185/5414/192683/23621/6855/…
GO:0042310	BP	vasoconstriction	81	0.591258	1.3877	3.45177e-05	0.00100153	0.00082113	5609	tags=68%, list=30%, signal=48%	1311/477/185/6869/2266/846/554/6338/148/150/183/5023/3356/342527/3351/2243/146/553/10242/3952/1910/1816/1401/3741/59/2244/3363/152/147/6532/4313/10800/552/1131/5021/551/6640/857/1908/3357/80852/6546/151/1909/59272/3792/27345/2149/3274/6915/5743/1621/3350/2702/1906
GO:0050432	BP	catecholamine secretion	56	0.641494	1.48504	3.50789e-05	0.00101025	0.000828277	3636	tags=64%, list=19%, signal=52%	1268/3745/1113/6623/6860/7432/84258/341359/6861/143425/1813/150/183/6857/4986/3356/6622/1137/9607/3737/3351/5020/1141/26281/51760/148281/8973/2668/91683/152/83849/6387/23208/5021/5028/5071
GO:0007588	BP	excretion	65	0.621826	1.44751	3.50789e-05	0.00101025	0.000828277	3568	tags=55%, list=19%, signal=45%	185/6869/1811/1188/50617/554/64241/6338/1813/6340/80763/148/2981/1187/5455/183/3778/525/4868/5020/1141/4881/1910/1143/54577/10699/4879/1136/552/55243/9356/7827/4867/116085/551/6865
GO:0072009	BP	nephron epithelium development	111	0.572306	1.36112	3.56402e-05	0.00102261	0.000838413	5793	tags=59%, list=31%, signal=41%	9370/80000/28999/2719/9241/10736/2302/7484/6608/5455/183/2247/26585/4868/9863/79191/170690/54361/130497/7021/25937/7477/1910/2138/6943/26249/5076/2668/2737/7471/2303/7482/9788/79192/186/4208/26508/7475/7827/8642/8842/5087/30812/3237/9500/5311/6299/7490/1909/7481/6469/3911/5175/2246/51804/947/4853/5727/4070/650/10409/255743/3913/2625/3975
GO:0000076	BP	DNA replication checkpoint signaling	17	-0.567159	-2.40889	3.59557e-05	0.00102785	0.000842713	1014	tags=53%, list=5%, signal=50%	54962/1763/63967/90381/8883/8318/4998/990/81620
GO:0004659	MF	prenyltransferase activity	17	-0.561827	-2.38624	4.28804e-05	0.00120518	0.000988095	8317	tags=100%, list=44%, signal=56%	1121/79947/9453/29914/2342/2339/5875/5229/116150/57107/2222/2224/5876/1352/27235/23590
GO:0014046	BP	dopamine secretion	37	0.687292	1.55536	4.29365e-05	0.00120518	0.000988095	3113	tags=68%, list=16%, signal=57%	1268/6623/6860/84258/341359/6861/143425/1813/6857/4986/3356/6622/1137/3737/3351/1141/26281/51760/148281/8973/2668/91683/83849/6387/23208
GO:0014059	BP	regulation of dopamine secretion	37	0.687292	1.55536	4.29365e-05	0.00120518	0.000988095	3113	tags=68%, list=16%, signal=57%	1268/6623/6860/84258/341359/6861/143425/1813/6857/4986/3356/6622/1137/3737/3351/1141/26281/51760/148281/8973/2668/91683/83849/6387/23208
GO:0061134	MF	peptidase regulator activity	221	0.521127	1.26674	4.29365e-05	0.00120518	0.000988095	5333	tags=48%, list=28%, signal=35%	10406/5104/27344/1470/4057/221476/26577/12/124857/2192/7980/3699/1285/5267/197/2719/866/347365/6423/3697/1474/4118/6691/89932/3698/80760/50859/27151/183/3827/144568/718/6622/4018/11005/259/327657/5858/27018/721/5275/59082/4803/51156/1473/199713/8434/153218/720/91662/5270/6317/5176/7078/51050/284293/2/462/7077/7035/57119/3273/5627/3700/3053/8710/135228/58189/710/6690/5345/9806/551/26998/939/857/63…
GO:0045165	BP	cell fate commitment	256	0.51263	1.25021	4.29365e-05	0.00120518	0.000988095	5858	tags=50%, list=31%, signal=35%	3175/22943/4916/6422/3226/7476/2066/2255/57453/11281/151449/367/23040/2596/2139/6423/121643/8643/10736/140628/25928/7483/7484/6910/4920/145258/6608/9096/4909/4760/54738/2247/26011/9573/429/2258/54361/9496/4063/6660/8456/3199/25925/7477/2138/2736/50846/5076/2290/63978/6913/2737/2623/3084/7101/7471/3236/58524/6886/63950/79923/2303/51384/7482/7041/64641/120237/3670/4208/9760/7475/2636/6657/80326/483…
GO:0007605	BP	sensory perception of sound	152	0.546045	1.31233	4.4059e-05	0.00122779	0.00100663	4412	tags=41%, list=23%, signal=32%	3249/53904/7275/51473/339768/84059/93035/1285/2070/84189/246213/65217/50617/64072/491/22953/1280/340990/53942/9455/10804/3815/2917/2561/124590/4036/375612/2558/84530/525/259236/7007/7068/375323/283310/222662/51168/1690/375611/1141/1687/2138/1428/125336/55084/3198/57731/1302/5077/9381/9750/4919/79955/117531/140469/9132/146183/6899/161497/8322/7399/83715/117532
GO:0005788	CC	endoplasmic reticulum lumen	310	0.498061	1.22049	4.4059e-05	0.00122779	0.00100663	5609	tags=44%, list=30%, signal=31%	91851/7018/335/337/338/1114/7476/213/1310/5179/4148/1066/1286/590/845/1356/10117/1285/2266/84570/1287/197/2719/5624/1191/2147/10418/1288/2695/10345/1280/174/844/64714/1297/3698/1000/29106/2322/2153/3827/7373/718/54905/92949/80310/54587/54361/7857/1296/2243/81578/1295/2159/51156/136227/8404/3488/720/2155/10232/7477/6345/3484/4052/140606/3990/4547/401138/54507/2641/23127/121506/7471/416/10272/1302/…
GO:0050954	BP	sensory perception of mechanical stimulus	173	0.539231	1.30245	4.46202e-05	0.00123897	0.0010158	4482	tags=42%, list=24%, signal=33%	3249/53904/7275/51473/339768/84059/93035/1285/23349/2070/84189/246213/65217/50617/64072/3736/491/22953/1280/340990/53942/9455/10804/3815/2917/2561/124590/4036/375612/2558/84530/525/3356/259236/7007/7068/375323/4914/6323/283310/222662/51168/1690/375611/1141/1687/2138/5270/63895/1428/125336/55084/3198/57731/1302/5077/9381/9750/6387/4919/7852/79955/117531/140469/9132/146183/6899/161497/8322/7399/837…
GO:0072073	BP	kidney epithelium development	140	0.551282	1.3203	4.68652e-05	0.00129205	0.00105932	5831	tags=56%, list=31%, signal=39%	9370/80000/6422/2045/9353/28999/2719/9241/10736/2302/6092/7484/6608/5455/183/2247/5979/26585/4868/9863/9244/79191/5915/170690/54361/130497/7021/168667/25937/7477/1910/2138/6943/26249/5076/2668/2737/2043/7471/2303/7482/9788/79192/655/186/4208/26508/7475/7827/8642/8842/25959/5087/30812/3237/6492/9500/5311/6299/7490/1909/7481/6469/3911/5175/2246/51804/947/4853/5727/4070/650/10409/255743/3913/2625/39…
GO:0006941	BP	striated muscle contraction	170	0.535798	1.29297	4.68652e-05	0.00129205	0.00105932	4840	tags=48%, list=26%, signal=36%	6327/1113/477/10021/1837/4842/845/287/6331/4634/6330/55800/6547/5350/7140/8913/6329/844/7134/148/23336/781/29119/2257/1756/9992/6444/51761/2258/89/6323/4626/342667/4607/2946/3741/3757/147/6769/783/6336/30845/10324/2281/126306/7852/775/3270/6262/6640/23704/857/7273/6324/2316/5294/3752/7139/1193/4635/1144/6546/7137/10052/1490/4624/51086/859/3764/59272/390594/59341/388428/23630/92241/2934/7138/56203…
GO:0097428	BP	protein maturation by iron-sulfur cluster transfer	16	-0.583179	-2.22981	4.91481e-05	0.00135018	0.00110698	7912	tags=100%, list=42%, signal=58%	64110/9391/220064/654483/81689/122961/150274/57002/552900/27247/51218/284106/10539/51647/84191
GO:0099174	BP	regulation of presynapse organization	33	0.68713	1.54364	4.97212e-05	0.0013563	0.001112	4974	tags=73%, list=26%, signal=54%	22943/26050/4916/22865/7476/84189/145581/26280/139065/6622/5789/11141/94030/84631/114798/10082/266727/869/57555/9746/147381/84628/8321/10160
GO:1905606	BP	regulation of presynapse assembly	33	0.68713	1.54364	4.97212e-05	0.0013563	0.001112	4974	tags=73%, list=26%, signal=54%	22943/26050/4916/22865/7476/84189/145581/26280/139065/6622/5789/11141/94030/84631/114798/10082/266727/869/57555/9746/147381/84628/8321/10160
GO:0022824	MF	transmitter-gated ion channel activity	60	0.613928	1.42523	5.13553e-05	0.00139108	0.00114051	5627	tags=75%, list=30%, signal=53%	2567/2903/2569/2566/2556/2894/2891/2743/2901/2899/2898/3359/2561/8001/2893/2558/2890/1137/170572/2900/2554/9177/1141/1143/2892/285242/8973/2895/1136/2562/2564/2565/1142/2741/1145/1144/2897/2559/2570/2555/55584/2560/1135/1139/200909
GO:0022835	MF	transmitter-gated channel activity	60	0.613928	1.42523	5.13553e-05	0.00139108	0.00114051	5627	tags=75%, list=30%, signal=53%	2567/2903/2569/2566/2556/2894/2891/2743/2901/2899/2898/3359/2561/8001/2893/2558/2890/1137/170572/2900/2554/9177/1141/1143/2892/285242/8973/2895/1136/2562/2564/2565/1142/2741/1145/1144/2897/2559/2570/2555/55584/2560/1135/1139/200909
GO:0042277	MF	peptide binding	288	0.504185	1.23241	5.3039e-05	0.00143168	0.0011738	4765	tags=36%, list=25%, signal=27%	4886/335/22871/887/6344/4804/2740/774/7434/2903/3929/117/4883/590/5746/9340/10886/84570/2690/1191/2891/29953/1395/1215/11136/886/554/5745/26232/799/2587/2893/322/23542/911/290/2861/4986/206338/4889/2890/154/1394/4985/4988/2642/913/23742/51555/43/56923/1410/553/1393/402569/94026/64106/773/4881/1910/3953/948/2892/58512/2946/6753/2043/3061/2834/2692/320/10316/10332/9452/7042/912/552/10267/2825/5021/…
GO:0010466	BP	negative regulation of peptidase activity	245	0.509665	1.24158	5.41615e-05	0.00145691	0.00119448	5333	tags=44%, list=28%, signal=32%	10406/5104/27344/1470/4057/221476/7448/12/124857/7980/3699/1285/5267/197/2719/866/347365/6423/3697/1474/6691/89932/3698/80760/50859/27151/183/3827/144568/4102/718/6622/4018/11005/259/327657/5858/721/5275/59082/4803/51156/1473/199713/1410/1378/8434/153218/720/5270/6317/728113/5176/653145/5076/3082/7078/51050/284293/2/462/7077/7035/57119/3273/5627/3700/3053/8710/135228/58189/710/6690/5345/9806/551/…
GO:0051315	BP	attachment of mitotic spindle microtubules to kinetochore	15	-0.609007	-2.31266	5.54467e-05	0.00148277	0.00121569	535	tags=53%, list=3%, signal=52%	3192/283489/10403/11004/83540/9212/1062/81620
GO:0031045	CC	dense core granule	26	0.724002	1.60124	5.55058e-05	0.00148277	0.00121569	2138	tags=54%, list=11%, signal=48%	547/1113/5179/6860/4852/6861/143425/80763/25924/6857/4985/7857/8618/1393
GO:0015293	MF	symporter activity	144	0.542283	1.301	5.69678e-05	0.0015114	0.00123916	4166	tags=44%, list=22%, signal=35%	55117/6564/6528/10568/57030/55089/9058/60482/246213/6538/284111/6512/220963/6555/9154/201780/9194/6506/340024/6559/115584/57419/6540/28968/50651/200010/160728/10991/8671/9153/6511/6530/6570/153201/6567/9122/6557/64849/6531/6569/6554/6532/120103/54716/6565/159963/125206/6571/81031/10786/123041/25769/9963/57282/57864/10246/387700/6539/113235/6527/83733/83697/162515/9152
GO:0033218	MF	amide binding	365	0.490771	1.20631	5.69678e-05	0.0015114	0.00123916	4765	tags=34%, list=25%, signal=26%	4886/335/2348/22871/887/6344/4804/2740/774/7434/2903/3929/33/117/4883/590/5746/9340/8435/10841/10886/84570/2690/1191/2891/29953/1395/1215/11136/886/554/5745/26232/799/2587/2893/322/23542/911/290/2861/4986/4099/5023/206338/4889/2890/154/1394/4985/4988/2642/913/23742/51555/43/25999/56923/1410/553/2352/1393/402569/94026/64106/773/4881/1910/3953/948/2892/58512/2946/6753/80339/2043/3061/2834/2692/320/…
GO:0007586	BP	digestion	137	0.545064	1.30434	5.92239e-05	0.00155528	0.00127514	5335	tags=49%, list=28%, signal=35%	5225/7032/335/337/6750/887/340547/4588/6869/2255/4883/12/5950/362/8435/7031/389015/56287/5733/1646/1582/115111/64241/150/1133/29881/4986/4760/340204/114131/1208/5644/6718/5020/5408/100507055/6343/3952/10753/948/389383/643834/339221/1131/440387/5021/6690/1645/51738/5406/4987/2168/113235/64240/5222/387129/1504/80168/116519/10891/6476/5645/3274/7442/1128/51302/27159
GO:0015103	MF	inorganic anion transmembrane transporter activity	149	0.540107	1.2968	5.92239e-05	0.00155528	0.00127514	5893	tags=53%, list=31%, signal=37%	203859/6528/2567/1811/63982/2569/2566/2556/1188/1179/11095/2743/6508/115111/5348/2561/8001/1187/2558/55879/6559/10060/8671/115019/121601/56923/2554/2568/54102/266675/6530/6570/6521/375611/6557/9376/6531/57348/1180/144453/6532/9635/2562/2564/2565/6571/9356/10786/57282/2741/1193/94015/83697/200959/50636/2559/57101/7809/55867/54831/284129/150160/26266/2570/25932/84230/2555/6561/219855/6560/368/85320…
GO:0060070	BP	canonical Wnt signaling pathway	297	0.499225	1.22136	5.92239e-05	0.00155528	0.00127514	4353	tags=33%, list=23%, signal=26%	1501/22943/2348/6422/6425/7476/2255/340419/8796/63923/6424/284654/1950/2719/152573/9241/22881/6423/144165/2735/205147/25928/84870/7483/7484/4920/9096/1000/27120/388336/26108/27303/147906/2247/1749/2262/26585/80114/83439/54361/120892/51704/25937/23072/8434/23500/80199/27123/7477/1910/3489/4163/2254/5218/3484/11211/2737/92162/7471/2487/57664/130574/51384/7482/10076/3670/7475/6657/80326/7162/219287/…
GO:0099173	BP	postsynapse organization	160	0.5284	1.27254	6.03519e-05	0.00157955	0.00129503	5324	tags=44%, list=28%, signal=32%	1501/547/22871/5649/4593/4884/4916/22865/22866/7476/2045/5063/9378/2596/158866/4747/2743/9379/57502/816/23316/1000/9118/388336/57497/5913/8499/23237/5789/11141/94030/4744/375323/22891/50944/120892/66000/51201/2895/2668/8506/2043/54413/26115/869/8292/57555/1742/1627/51738/8326/26052/2213/91752/26045/58504/51086/729956/64101/85358/84628/10458/6792/10160/8828/55619/4897/8829/80823/2534
GO:0097553	BP	calcium ion transmembrane import into cytosol	148	0.544451	1.30747	6.148e-05	0.00160365	0.0013148	4779	tags=48%, list=25%, signal=36%	774/27112/477/2903/4842/6366/845/6363/287/6547/2147/6543/5350/6261/10345/57338/799/3358/844/57158/1813/84502/7220/2852/55283/2247/5023/781/3356/6622/779/5587/1756/2814/930/773/9472/1236/162514/6263/1812/2946/9001/777/2281/728215/2815/3708/9002/126306/775/123041/25769/3270/6262/4923/3357/1193/6546/2829/2811/5311/187/10268/55503/59341/6375/387129/493/2149/201140
GO:0046112	BP	nucleobase biosynthetic process	18	-0.554624	-2.47664	6.32653e-05	0.00164469	0.00134844	1541	tags=61%, list=8%, signal=56%	2618/353/8833/51727/1503/6470/100/5471/6472/3251/10606
GO:0061135	MF	endopeptidase regulator activity	188	0.526727	1.27492	6.3736e-05	0.00165138	0.00135393	5333	tags=50%, list=28%, signal=36%	10406/5104/27344/1470/4057/12/124857/7980/3699/1285/5267/197/866/347365/6423/3697/1474/6691/89932/3698/80760/50859/27151/183/3827/144568/718/6622/4018/11005/259/327657/5858/721/5275/59082/4803/51156/1473/199713/8434/153218/720/5270/6317/5176/7078/284293/2/462/7077/7035/57119/3273/5627/3700/3053/8710/135228/58189/710/6690/5345/9806/551/26998/939/6318/6695/5054/5273/22861/128821/5276/164237/83464/5…
GO:0008236	MF	serine-type peptidase activity	183	0.525632	1.27127	6.71202e-05	0.00172751	0.00141634	5880	tags=52%, list=31%, signal=36%	3249/5649/57628/4057/5126/1511/26085/3240/64499/5624/1804/2147/7177/7092/1991/23430/4316/1215/162494/5648/3026/2160/5340/4018/5644/5122/49/339967/341277/346702/203074/2159/2155/5651/84000/10003/339501/8492/132724/716/11330/4313/10699/10136/164656/25823/63036/440387/8909/28983/51032/715/7093/360226/3003/283471/43849/3817/344805/389208/10942/5657/80975/54504/23436/1675/11012/400668/5327/9407/1513/2…
GO:0021700	BP	developmental maturation	294	0.502119	1.22809	6.71202e-05	0.00172751	0.00141634	5868	tags=47%, list=31%, signal=33%	5649/440279/8854/4057/4653/3479/1811/7704/6496/6366/6363/6900/9378/2266/5241/158866/5064/4747/4880/6954/163589/577/440712/6261/5745/816/1258/51412/1672/84530/54738/126668/257062/718/56165/26256/429/5979/26585/11005/8941/25893/124925/646/89/50944/120892/5139/2046/8434/152015/3952/1910/645811/5076/29842/51201/10882/8419/342035/1028/4776/64100/57731/2692/7471/59277/163175/9148/6886/1524/83853/4313/3…
GO:0045664	BP	regulation of neuron differentiation	185	0.526255	1.27318	7.05043e-05	0.00180263	0.00147793	5518	tags=48%, list=29%, signal=34%	22943/22871/9745/6422/4674/6496/151449/6900/339479/6457/392255/4009/6423/1620/375567/152330/4909/221336/90527/4099/4760/57795/429/654/5979/238/79191/1840/1600/221938/8929/4803/120892/51704/3199/5121/50674/7732/8200/2260/79727/26281/1910/2138/2290/9638/2737/152/7101/6532/402117/6935/4131/6387/50937/4211/3670/655/4208/26508/7074/6657/6925/3400/3232/7224/5087/30812/4058/85458/30012/64843/57540/151/6…
GO:0022412	BP	cellular process involved in reproduction in multicellular organism	400	0.485573	1.19445	7.05043e-05	0.00180263	0.00147793	6382	tags=46%, list=34%, signal=31%	56776/63951/2348/5104/6422/56154/3479/1811/7704/91646/9353/84072/79400/84229/4880/6954/163589/283417/54514/56853/658/6092/4948/6691/29118/147872/3815/101928601/22873/8382/346288/676/140690/1672/26108/8900/58494/126668/257062/56165/26256/401024/54456/135138/54937/84944/79582/374308/6586/26038/346673/27306/646/54361/81492/338773/339834/122402/204474/6847/64753/1761/5139/81626/246777/160762/56163/17…
GO:0008188	MF	neuropeptide receptor activity	43	0.65588	1.49576	7.16323e-05	0.00180761	0.00148201	5443	tags=81%, list=29%, signal=58%	4886/114815/6869/10886/22986/57537/2587/2861/4889/4988/56923/64106/4158/10888/6753/2834/10316/84634/6870/680/84109/51083/6865/4923/4829/2925/4887/4935/10887/387129/6752/128674/3062/23620/2847
GO:0043266	BP	regulation of potassium ion transport	100	0.566956	1.34314	7.16323e-05	0.00180761	0.00148201	4753	tags=50%, list=25%, signal=38%	57628/3787/486/4842/3755/845/287/88/7432/1804/30820/3736/482/3788/6000/1813/2273/150/2645/4986/219527/3746/3356/9992/30818/6833/65267/9472/1812/3741/3779/3757/126755/5999/57463/23704/51083/857/3747/2316/1908/144245/7881/859/81832/3792/23630/30819/4878/4846
GO:0034764	BP	positive regulation of transmembrane transport	209	0.522261	1.26742	7.16323e-05	0.00180761	0.00148201	5803	tags=50%, list=31%, signal=35%	55600/9370/5649/5354/27092/3479/486/4842/287/88/28999/2719/2147/2695/3736/9104/482/10345/6000/799/844/5348/57158/7220/2852/183/4986/644139/6506/219527/5023/3746/718/781/23237/6622/154/1756/9992/9965/6833/65267/25999/342667/930/9472/10580/1812/2946/388581/9001/3779/3757/126755/6769/6569/57165/54413/783/30845/2688/5174/9002/57463/6262/51083/5243/3747/4923/2316/1908/760/144245/10368/729230/5311/187/…
GO:0030133	CC	transport vesicle	382	0.484901	1.19191	7.16323e-05	0.00180761	0.00148201	4589	tags=31%, list=24%, signal=24%	2348/9892/440279/10590/4884/1113/115827/169026/2903/5126/3479/5179/203190/6854/57030/8224/1359/6860/246213/6572/84623/284612/84258/140767/9145/9899/1363/341359/9627/6861/6616/55530/143425/9182/4135/24141/1813/80763/2572/114088/4909/22987/29106/25924/5865/359/6857/4986/7781/525/6622/4922/2890/4985/9900/273/389376/1809/11037/5122/117248/94122/142684/6833/4803/22895/81615/120892/8082/79953/8448/1670…
GO:1903035	BP	negative regulation of response to wounding	87	0.582592	1.37161	7.27604e-05	0.00183011	0.00150047	4777	tags=55%, list=25%, signal=41%	7448/22915/2266/56963/149461/7143/5624/2147/170692/146760/2160/5340/3827/2247/3848/350/25817/5156/54361/2243/6833/90102/9856/5270/2244/58529/2043/7035/5802/3273/5592/5627/135228/58189/710/5345/1361/7057/5054/7056/2811/5327/239/5055/3818/947/4846/240
GO:0098815	BP	modulation of excitatory postsynaptic potential	38	0.673393	1.52632	7.61445e-05	0.00190903	0.00156517	3345	tags=58%, list=18%, signal=48%	22871/152404/5649/7476/22999/9378/6547/9699/6543/56853/57502/23316/154/50944/120892/66000/84866/54413/869/5999/57555/1742
GO:0098992	CC	neuronal dense core vesicle	13	0.830288	1.708	7.90898e-05	0.00197648	0.00162047	1933	tags=69%, list=10%, signal=62%	547/1113/5179/6860/4852/6861/4985/7857/8618
GO:0099172	BP	presynapse organization	51	0.637597	1.47058	8.06567e-05	0.00200916	0.00164726	5025	tags=63%, list=27%, signal=46%	22943/26050/27445/22871/4916/22865/7476/84189/145581/26280/57502/53942/139065/6622/5789/11141/94030/84631/114798/10082/54413/266727/8927/869/57555/347731/9746/147381/84628/8321/10160/27253
GO:0022853	MF	active ion transmembrane transporter activity	246	0.510221	1.24296	8.51689e-05	0.00211261	0.00173207	5926	tags=47%, list=31%, signal=33%	55117/6564/477/6528/1811/10568/57030/9058/389015/60482/6547/6538/353189/284111/114571/6543/491/6512/84239/6508/115111/480/6555/9154/201780/9194/6579/6506/479/6559/115584/57419/6540/50651/200010/160728/10060/8671/115019/6578/6833/10864/1339/9153/53919/6511/6530/6570/6521/153201/492/375611/344905/6557/9376/64849/170712/6531/10599/133482/285195/6569/6554/6532/54716/495/6565/159963/125206/6571/9356/8…
GO:0051988	BP	regulation of attachment of spindle microtubules to kinetochore	13	-0.647511	-2.3056	8.53551e-05	0.00211261	0.00173207	1186	tags=62%, list=6%, signal=58%	55920/10615/90417/1894/9212/29127/891/4751
GO:0099568	CC	cytoplasmic region	258	0.504579	1.23084	8.7425e-05	0.00215695	0.00176843	6348	tags=48%, list=33%, signal=32%	547/27445/440279/8120/51473/200162/22999/200373/89876/1641/84871/4747/54768/50632/9699/374407/7345/10382/7802/1769/2899/92749/2735/3798/2898/83538/55259/55130/132851/144535/1770/127602/4137/79659/26059/23237/80258/4133/1740/4988/79582/199221/64446/81492/90102/120892/160762/84709/66000/4130/27019/115948/85452/2770/124602/2737/3800/9001/51314/8701/154313/146754/8927/348807/154288/164714/126820/881/…
GO:0043279	BP	response to alkaloid	95	0.572581	1.35337	9.19372e-05	0.00225392	0.00184793	4007	tags=42%, list=21%, signal=33%	1268/6869/27092/5179/590/845/2690/6261/9455/1813/8128/4986/6506/3356/779/4988/5122/2019/3351/2354/5020/1996/1393/1141/1816/6531/6263/1812/2946/6569/5309/6870/5582/5999/5021/7852/6262/221935/6546/114
GO:0198738	BP	cell-cell signaling by wnt	435	0.478255	1.17782	9.19372e-05	0.00225392	0.00184793	4353	tags=31%, list=23%, signal=25%	1501/22943/5563/2348/6422/6425/51473/7476/4653/2255/340419/8796/63923/11197/6424/284654/343637/1950/28999/2719/152573/9241/22881/6423/144165/1363/2735/205147/25928/4693/57216/84870/7483/7484/1813/4920/145258/9096/1000/27120/388336/26108/25806/27303/147906/2247/1749/387914/2262/4988/26585/9863/56033/4139/80114/83439/54361/388630/166336/120892/51704/25937/80319/23072/8434/8532/23500/80199/27123/747…
GO:0015370	MF	solute:sodium symporter activity	72	0.603165	1.41207	9.30653e-05	0.00227437	0.0018647	4166	tags=57%, list=22%, signal=45%	55117/6528/10568/57030/9058/60482/6538/284111/6512/6555/9154/201780/6506/6559/115584/6540/200010/160728/8671/9153/6511/6530/6570/6557/64849/6531/6569/6554/6532/54716/159963/125206/6571/10786/9963/57282/10246/6539/6527/83697/9152
GO:0005744	CC	TIM23 mitochondrial import inner membrane translocase complex	14	-0.621179	-2.2973	9.59092e-05	0.00233651	0.00191564	7191	tags=57%, list=38%, signal=35%	26519/134266/10440/100287932/29090/293/80273/29103
GO:0031093	CC	platelet alpha granule lumen	67	0.606572	1.4141	9.75775e-05	0.00236969	0.00194286	4364	tags=54%, list=23%, signal=42%	213/3479/7044/12/22915/88/2266/1950/197/1191/2277/5340/2153/3827/2162/2243/3481/3671/3082/5005/2244/2/5196/7042/5004/3273/5627/710/5345/7057/5054/2157/1/1675/7450/7424
GO:0019935	BP	cyclic-nucleotide-mediated signaling	82	0.593112	1.39274	0.00010209	0.00247153	0.00202635	4749	tags=57%, list=25%, signal=43%	6344/2740/117/116/4880/2695/108/3358/2981/10900/27115/1672/5152/10335/50940/5138/51555/5139/3000/6343/118442/4881/1910/948/9472/2770/107/2692/5443/10486/2982/4879/5592/2044/2977/51083/3747/4987/7057/3357/10846/2983/187/23551/4882/2696/4878
GO:0007200	BP	phospholipase C-activating G protein-coupled receptor signaling pathway	102	0.55564	1.31751	0.000103218	0.00249105	0.00204235	3973	tags=50%, list=21%, signal=40%	887/1113/2850/185/6869/4883/88/7432/2147/5733/846/1129/886/5745/3358/1813/148/2922/150/183/4986/2840/3356/4985/4988/2843/1902/2099/146/56923/64805/1910/1816/1812/2915/147/10316/796/1524/2911/1901/9002/5028/286530/3973/2854/4987/4829/3357/2925/27334
GO:0070509	BP	calcium ion import	87	0.580096	1.36573	0.00010773	0.00259187	0.00212502	5324	tags=54%, list=28%, signal=39%	774/27112/931/1950/6547/846/6543/5350/8911/8913/799/2645/115352/5023/781/779/286097/65267/773/162514/2916/777/8912/2641/783/57119/6387/728215/6690/7223/775/123041/25769/6546/5311/859/10268/100507027/55503/59341/493/283652/196051/5159/7442/6347/2534
GO:0048863	BP	stem cell differentiation	206	0.517226	1.25477	0.000111114	0.00266502	0.00218498	4371	tags=36%, list=23%, signal=28%	2348/9723/11166/223117/6422/8854/7476/2066/2823/55698/144165/9464/6910/5308/3815/145258/6608/1000/221662/2247/4222/5979/5156/9965/399694/130497/8929/2099/117854/6660/4054/79727/1910/57556/56920/5076/8092/2668/10500/6939/3084/2/2487/3204/6886/54437/2303/7042/5764/340665/81606/3670/655/4208/80326/8626/8320/8482/3214/1908/55553/7478/30812/3357/121340/8463/10371/2103/6899/29947/1909/6469/3911/64321/8…
GO:0005254	MF	chloride channel activity	73	0.591463	1.38525	0.000114498	0.00271259	0.00222399	5409	tags=59%, list=29%, signal=42%	203859/2567/63982/2569/2566/2556/1188/1179/2743/115111/5348/2561/8001/1187/2558/55879/115019/121601/56923/2554/2568/54102/266675/57348/1180/144453/9635/2562/2564/2565/2741/1193/94015/200959/50636/2559/57101/7809/54831/2570/25932/2555/2560
GO:0019233	BP	sensory perception of pain	99	0.564554	1.33656	0.000114498	0.00271259	0.00222399	6130	tags=66%, list=32%, signal=45%	1268/4886/6869/6863/2903/5179/11280/1269/23349/7432/55273/55800/2695/3736/7345/4856/80763/3231/4986/3356/4985/6335/4988/1137/3737/4692/4914/5020/6323/3751/56923/1141/1910/151647/10893/796/6336/2911/6387/57555/7852/5028/4923/4987/729230/3593/11343/23621/3375/2149/117194/5743/7442/85446/56925/6347/54463/2534/8989/1906/134/3218/58503/623/5024
GO:0007613	BP	memory	122	0.550932	1.31438	0.000114498	0.00271259	0.00222399	3677	tags=42%, list=19%, signal=34%	1268/64478/5649/4593/6869/2903/22986/3776/6860/6547/57144/4009/2695/6543/8516/139411/57338/23316/1620/1813/4909/6326/266743/4137/3356/23237/2890/2258/6833/5020/4803/50944/1141/4130/5176/9486/7436/1812/107/164312/4776/6517/6532/814/1524/23208/5764/5021/25769/338811/143941
GO:0007517	BP	muscle organ development	327	0.492033	1.20652	0.000114498	0.00271259	0.00222399	6292	tags=51%, list=33%, signal=35%	1674/3479/1310/150921/4223/6258/2006/4634/1271/6442/10290/9241/6445/93649/6261/5079/22953/23414/1489/140578/844/64208/57158/575/7134/2273/54715/145258/6608/146862/92737/4036/101929726/221662/8910/26287/3908/51676/11149/1756/4868/2121/6444/9099/4703/51778/8929/341405/89/4638/11023/6876/1410/3481/6943/60529/4607/283078/8506/6939/58529/3084/8912/3236/9148/150572/9734/3131/5077/6665/6474/63950/9750/3…
GO:0050805	BP	negative regulation of synaptic transmission	69	0.600982	1.40428	0.000116765	0.00274949	0.00225424	4091	tags=48%, list=22%, signal=38%	9370/3745/590/22986/1269/6860/7143/57537/56853/57502/2899/2898/1813/4137/3356/23237/4889/2890/3351/43/120892/1816/2895/1812/84866/6532/869/23208/25769/5071/2550/114/392862
GO:0050770	BP	regulation of axonogenesis	154	0.534362	1.28498	0.000116765	0.00274949	0.00225424	6600	tags=58%, list=35%, signal=38%	9723/223117/7476/2045/23105/23566/6900/5063/8153/9353/7143/4747/1382/57689/3897/57611/6092/140578/1826/4135/4915/1000/91584/1946/4099/4137/1630/10090/1949/4133/5979/9024/9423/2258/1600/5365/4803/114798/9856/57556/56920/10500/23111/2043/84446/6474/6585/5802/54437/4131/6387/57463/7074/1627/8482/7224/80128/6091/10371/85458/27185/3792/4168/10154/80031/5454/6792/1123/627/10501/9706/8829/54910/1002/649…
GO:0098657	BP	import into cell	231	0.509112	1.2387	0.0001213	0.00284761	0.00233468	5720	tags=49%, list=30%, signal=35%	2348/774/27112/6564/477/10021/486/4842/389015/84889/6547/6538/3773/6542/6543/6512/482/6616/799/480/6338/1813/6340/80763/79689/79901/5865/4036/183/1261/6506/5023/479/781/6622/6559/779/6540/9992/3768/3763/222962/10060/65267/6511/6530/6570/6567/2670/773/6557/9890/948/162514/2170/6581/6531/2668/1812/777/3757/285195/6569/6532/120103/2911/54716/495/6565/5999/728215/6571/51305/81031/775/123041/25769/235…
GO:0032806	CC	carboxy-terminal domain protein kinase complex	18	-0.538466	-2.40449	0.000121885	0.00285269	0.00233885	8760	tags=100%, list=46%, signal=54%	64210/2068/2968/905/2071/728340/8621/2965/8812/51755/1025/904/404672/4331/902/2967/1022
GO:0097479	BP	synaptic vesicle localization	52	0.63532	1.46544	0.000125834	0.00292744	0.00240014	3636	tags=40%, list=19%, signal=33%	9892/27445/22871/8120/6854/8224/3798/1000/6622/4133/9024/120892/79953/6853/3800/6517/84446/57555/8825/80128/5071
GO:0016324	CC	apical plasma membrane	357	0.486918	1.19637	0.000125834	0.00292744	0.00240014	6432	tags=49%, list=34%, signal=33%	7348/7018/2348/3249/84417/6564/146894/1811/10568/362/287/5314/389015/3776/1271/89872/60676/50617/846/3736/491/482/11136/5745/22953/6514/340990/4118/57216/64241/5348/6338/10804/6340/6555/3938/2813/338328/1000/79901/4036/359/29881/3778/9365/340024/525/479/6519/6559/154/1579/10149/140803/222962/7380/160728/10991/8777/115019/1087/5244/222662/5593/6567/6557/9376/54825/948/8470/150084/5169/4921/50506/7…
GO:0061045	BP	negative regulation of wound healing	71	0.590263	1.38117	0.000132636	0.00307644	0.0025223	4777	tags=59%, list=25%, signal=44%	7448/22915/2266/149461/5624/2147/170692/2160/5340/3827/2247/3848/350/25817/5156/54361/2243/6833/90102/5270/2244/58529/7035/3273/5592/5627/135228/58189/710/5345/1361/7057/5054/7056/2811/5327/239/5055/3818/947/4846/240
GO:0003002	BP	regionalization	349	0.488422	1.19917	0.000134903	0.00311969	0.00255776	6292	tags=49%, list=33%, signal=34%	64388/22943/5649/64399/128344/6422/8854/3226/7476/2255/7704/57453/6496/4223/367/2719/7092/163589/9241/6423/121643/10736/658/2302/2735/140628/25928/3211/6092/5100/5308/8646/4920/145258/6608/9096/4909/4036/25806/4760/2247/126668/718/79659/23237/56165/4222/9573/429/2018/26585/3201/56033/199221/2019/79191/168507/134701/130497/3229/3233/3199/80319/10655/80199/3212/7477/2736/60529/5076/2290/2668/344022…
GO:0017070	MF	U6 snRNA binding	14	-0.609988	-2.25591	0.000136895	0.00315633	0.0025878	7403	tags=100%, list=39%, signal=61%	64852/10594/7919/9733/55696/51574/51691/57819/27258/51690/9128/1984/25804
GO:0000463	BP	maturation of LSU-rRNA from tricistronic rRNA transcript (SSU-rRNA, 5.8S rRNA, LSU-rRNA)	15	-0.582409	-2.21166	0.000142245	0.00326995	0.00268095	7926	tags=47%, list=42%, signal=27%	84365/55759/23246/84154/6129/285855/11224
GO:0060041	BP	retina development in camera-type eye	148	0.536107	1.28743	0.000143972	0.00329986	0.00270547	5279	tags=47%, list=28%, signal=34%	7275/6496/5950/1641/57030/1545/246213/6096/2823/1735/54549/491/91156/56853/121643/658/4693/23363/1826/4915/25806/4760/7068/5979/5961/5156/343035/51761/43/7021/5158/6121/5176/5076/23418/2916/196740/348980/57010/7101/6604/30813/7287/50939/7042/5797/4867/8842/94137/6247/5145/221935/30812/57096/57381/3549/2779/84465/8322/493/22899/6101/5159/25932/6010/286204/10461/10002/8829
GO:0042730	BP	fibrinolysis	24	0.726497	1.59622	0.00014455	0.00330332	0.00270832	4446	tags=83%, list=23%, signal=64%	2266/2147/2160/5340/3848/350/2243/2244/3273/5627/710/5345/1361/7057/5054/7056/2811/5327/5055/3818
GO:0008353	MF	RNA polymerase II CTD heptapeptide repeat kinase activity	12	-0.614199	-2.06374	0.000148126	0.00336398	0.00275805	7322	tags=100%, list=39%, signal=61%	23476/5594/8621/8812/51755/1025/1019/1021/1022/1024/983
GO:2000300	BP	regulation of synaptic vesicle exocytosis	55	0.626016	1.44755	0.000148507	0.00336398	0.00275805	3593	tags=45%, list=19%, signal=37%	1268/140730/22871/7476/6860/1813/148/150/6857/5023/3356/5217/3351/120892/6853/8973/1812/107/320/783/5579/5413/5582/5028/1142
GO:1900047	BP	negative regulation of hemostasis	49	0.627652	1.44387	0.000148507	0.00336398	0.00275805	4753	tags=65%, list=25%, signal=49%	1311/7448/2266/5624/2147/170692/2160/5340/3827/3848/350/5156/2243/5270/2244/7035/3273/5592/5627/710/5345/1361/7057/5054/7056/2811/5327/239/5055/3818/947/4846
GO:0099601	BP	regulation of neurotransmitter receptor activity	60	0.601293	1.3959	0.000150774	0.00339548	0.00278387	6054	tags=72%, list=32%, signal=49%	22871/5649/4884/8000/27092/729993/9228/23467/66004/9229/388336/23542/440829/23237/154/4988/50944/146395/1393/59284/58512/54413/4208/57555/1742/1612/27091/10368/729230/729956/81832/85358/399968/10369/1392/5923/6347/254263/149111/5924/80863/4885/59283
GO:0004252	MF	serine-type endopeptidase activity	166	0.528859	1.27566	0.000150774	0.00339548	0.00278387	5880	tags=53%, list=31%, signal=37%	3249/4057/5126/1511/26085/3240/64499/5624/2147/7177/7092/1991/23430/4316/1215/162494/5648/3026/2160/5340/4018/5644/5122/49/339967/341277/346702/203074/2159/2155/5651/84000/339501/8492/132724/716/11330/4313/10699/10136/164656/25823/63036/440387/28983/51032/715/7093/360226/3003/283471/43849/3817/344805/389208/10942/5657/80975/23436/1675/11012/400668/5327/9407/1513/260429/3818/94031/4327/1504/354/32…
GO:0048880	BP	sensory system development	386	0.483984	1.18954	0.000153041	0.00342229	0.00280585	5796	tags=45%, list=31%, signal=32%	91851/341640/2792/8854/7275/7476/2255/4081/57110/6496/5950/340273/362/1641/6297/57030/1545/84189/8076/246213/6096/2823/2202/1735/54549/491/91156/56853/121643/658/7111/11081/170692/4693/23363/10218/1826/7483/4915/7484/1813/5308/146862/27151/124842/64093/25806/4760/2247/718/9573/7068/654/1543/5979/5961/5156/155051/343035/5915/51761/10586/1296/2295/1295/43/7021/8929/5158/220/6121/11023/1410/64805/74…
GO:0000054	BP	ribosomal subunit export from nucleus	14	-0.606609	-2.24341	0.00015329	0.00342229	0.00280585	7467	tags=64%, list=39%, signal=39%	55781/161424/84946/3692/6059/23212/5901/6209/4869
GO:0033750	BP	ribosome localization	14	-0.606609	-2.24341	0.00015329	0.00342229	0.00280585	7467	tags=64%, list=39%, signal=39%	55781/161424/84946/3692/6059/23212/5901/6209/4869
GO:0090665	CC	glycoprotein complex	21	0.739788	1.6043	0.000156088	0.00347475	0.00284887	4380	tags=76%, list=23%, signal=59%	54221/6442/6445/5239/8910/1756/6444/2814/8082/54212/2815/6640/137868/2811/859/7402
GO:0005326	MF	neurotransmitter transmembrane transporter activity	19	0.751223	1.61723	0.00015656	0.00347526	0.00284928	2857	tags=63%, list=15%, signal=54%	55117/57030/246213/6572/55879/28968/222962/9153/6530/6581/6531/6532
GO:0001656	BP	metanephros development	88	0.565689	1.33266	0.000157576	0.00347789	0.00285143	5036	tags=53%, list=27%, signal=39%	9370/80000/2255/2719/392255/8516/10736/80144/2302/6092/7484/6608/5455/359/5979/26585/5156/79191/54361/130497/7021/25937/7477/2138/6943/5076/2668/2737/2303/79192/2200/3227/655/186/7827/30812/5311/6299/7490/6469/231/64321/1958/51804/947/5727/5159
GO:0009582	BP	detection of abiotic stimulus	138	0.543272	1.30011	0.000157576	0.00347789	0.00285143	5817	tags=57%, list=31%, signal=40%	2792/3249/4804/6869/6863/84059/114780/63982/10886/54112/23349/3736/2898/1258/3815/1000/79054/24/3356/80036/6785/5961/5957/51761/168507/4914/5158/6121/6323/222662/3000/5270/23418/63895/2916/10893/57010/94233/388531/796/131890/54437/7287/342372/6387/7852/123041/25769/6247/84694/7273/4923/79955/7222/117531/2779/161497/5311/58473/859/27039/117532/23621/6295/6101/25861/6010/7442/56925/10002/2534/55584…
GO:0000478	BP	endonucleolytic cleavage involved in rRNA processing	15	-0.576233	-2.1882	0.000158553	0.00347964	0.00285287	8043	tags=60%, list=42%, signal=35%	161424/29777/10607/10799/6227/23212/23246/8602/10171
GO:0000479	BP	endonucleolytic cleavage of tricistronic rRNA transcript (SSU-rRNA, 5.8S rRNA, LSU-rRNA)	15	-0.576233	-2.1882	0.000158553	0.00347964	0.00285287	8043	tags=60%, list=42%, signal=35%	161424/29777/10607/10799/6227/23212/23246/8602/10171
GO:0010951	BP	negative regulation of endopeptidase activity	236	0.506841	1.23364	0.00016211	0.00354765	0.00290863	5333	tags=44%, list=28%, signal=32%	10406/5104/27344/1470/4057/7448/12/124857/7980/3699/1285/5267/197/866/347365/6423/3697/1474/6691/89932/3698/80760/50859/27151/183/3827/144568/4102/718/6622/4018/11005/259/327657/5858/721/5275/59082/4803/51156/1473/199713/1410/1378/8434/153218/720/5270/6317/728113/5176/653145/5076/3082/7078/284293/2/462/7077/7035/57119/3273/5627/3700/3053/8710/135228/58189/710/6690/5345/9806/551/26998/939/6318/669…
GO:0001503	BP	ossification	401	0.480991	1.18325	0.000164377	0.00358713	0.002941	5197	tags=38%, list=27%, signal=28%	91851/22943/651/285313/6422/1311/4057/6869/4653/3479/5179/2662/7704/340419/84059/63923/4958/4745/197/2719/6096/25884/50617/4880/846/9241/6423/6261/5745/10736/658/1280/2735/9464/8646/4330/4920/6608/4256/64093/9365/2247/1591/525/1749/57419/154/654/5587/26585/653/54361/338773/134701/130497/43/5020/89/202151/3199/25937/5744/4054/222663/3488/7123/8200/3952/7477/1834/10143/3481/2736/2254/50846/645811/3…
GO:0099529	MF	neurotransmitter receptor activity involved in regulation of postsynaptic membrane potential	49	0.625771	1.43955	0.000166645	0.00362639	0.00297319	5547	tags=78%, list=29%, signal=55%	2567/2569/2566/2556/2894/2743/2901/2899/2898/2561/2558/2890/1137/2900/2554/1141/1143/2892/8973/2895/1136/2564/2565/1142/2741/1145/1144/2550/2897/2559/153/2570/1128/2555/55584/2560/1135/1139
GO:0005253	MF	anion channel activity	86	0.572129	1.34655	0.000173446	0.00374286	0.00306868	5409	tags=53%, list=29%, signal=38%	203859/2567/63982/2569/2566/2556/1188/1179/2743/115111/5348/2561/8001/1187/2558/55879/115019/121601/56923/2554/2568/54102/266675/57348/1180/144453/9635/2562/2564/2565/10786/2741/1193/94015/200959/50636/2559/57101/7809/54831/150160/2570/25932/84230/2555/2560
GO:0120254	BP	olefinic compound metabolic process	155	0.531927	1.27893	0.000173446	0.00374286	0.00306868	6005	tags=54%, list=32%, signal=37%	125/5740/9227/2938/8854/7276/1583/5950/126/1586/1545/1559/127/1646/174/124/5730/6338/339761/27120/24/1557/10858/195814/1579/654/1543/1548/653/145226/54361/220/6121/1910/1555/1553/2946/1558/8912/54898/1549/113612/441282/57016/1544/1645/6716/8399/131/5406/216/8605/9415/1562/3992/246/1588/1572/247/1571/239/231/11343/5742/284541/60481/50700/1958/158833/240/83875/5743/10170/3991/650/1601/27122/1551/32…
GO:0032838	CC	plasma membrane bounded cell projection cytoplasm	219	0.510522	1.24053	0.000173446	0.00374286	0.00306868	6348	tags=49%, list=33%, signal=33%	547/8120/51473/200162/200373/89876/1641/84871/4747/54768/50632/374407/7345/10382/7802/1769/2899/92749/2735/3798/2898/83538/55259/55130/132851/144535/1770/127602/4137/79659/23237/80258/4133/1740/4988/79582/199221/64446/81492/120892/160762/84709/66000/4130/27019/115948/85452/124602/2737/3800/9001/51314/8701/154313/146754/348807/164714/126820/881/1742/144406/56171/94137/123872/57576/80128/54777/9210…
GO:0015085	MF	calcium ion transmembrane transporter activity	133	0.536997	1.28351	0.000175713	0.00378126	0.00310016	4832	tags=50%, list=25%, signal=38%	1268/774/27112/27092/2903/114780/59285/6547/2823/6543/491/6261/785/8911/8913/79054/7220/55283/781/80036/57419/779/4988/140803/3351/168507/55799/9254/492/773/162514/59284/6263/786/777/8912/783/4308/140738/117144/342372/2281/728215/3708/7223/775/123041/25769/6262/7224/7222/6546/117531/378807/57113/27091/10368/5311/80228/55503/27039/59341/117532/493/10369/283652/255022
GO:0086065	BP	cell communication involved in cardiac conduction	56	0.620617	1.43671	0.000180248	0.00386809	0.00317135	4131	tags=52%, list=22%, signal=41%	477/10021/845/287/6331/6330/55800/482/10345/8913/6910/9096/781/29119/79191/3741/783/6336/2281/775/3270/6262/857/6324/2316/478/6546/10052/51086
GO:0008097	MF	5S rRNA binding	10	-0.706358	-2.16558	0.000181751	0.00387886	0.00318019	2050	tags=90%, list=11%, signal=80%	4193/6125/6135/29074/2971/7263/6122/23212/84154
GO:0031118	BP	rRNA pseudouridine synthesis	10	-0.705969	-2.16438	0.000181751	0.00387886	0.00318019	5582	tags=60%, list=29%, signal=42%	84881/27079/113000/55651/54433/1736
GO:0016358	BP	dendrite development	230	0.508348	1.23638	0.000182515	0.00388446	0.00318478	4774	tags=39%, list=25%, signal=30%	1501/547/22871/5649/10642/51473/7476/23105/5063/158866/577/9201/816/25830/23316/23363/1826/4135/114788/51412/29993/23542/2861/1630/8499/23237/4133/4917/5789/238/11141/653/4139/80243/124925/9423/1600/1608/22891/23426/50944/120892/23072/8577/1996/50674/1141/9856/4130/7436/85442/4776/2043/7101/9148/26115/5802/1496/7287/1136/4131/154288/5592/5764/655/4208/57555/1742/7162/1627/51738/3196/7224/221935/2…
GO:0090101	BP	negative regulation of transmembrane receptor protein serine/threonine kinase signaling pathway	124	0.548025	1.30783	0.00018705	0.00395922	0.00324607	5796	tags=50%, list=31%, signal=35%	3175/91851/64388/22943/23089/168002/3547/1149/6422/8483/124857/9241/6423/25928/348093/375567/8646/4856/4036/9573/26585/9863/168667/65997/4052/23111/7471/10272/10468/402117/2201/164656/7041/2200/753/114990/81031/858/54756/135228/79674/11117/54829/857/57057/148738/9480/4035/94031/652991/7049/7043/8321/50964/221044/9719/375387/650/3303/6498/5654/57045
GO:0060284	BP	regulation of cell development	486	0.47097	1.16259	0.00018705	0.00395922	0.00324607	6672	tags=46%, list=35%, signal=31%	335/9370/5649/9723/223117/4916/4057/7476/4653/3479/2045/2192/23105/23566/5063/8153/2266/9353/6860/7143/4747/5803/5624/2147/4880/6954/1382/9241/283659/3897/5324/816/57611/23316/6092/1620/140578/443/23363/51208/1826/4135/4915/1813/3815/6608/4036/91584/2852/1946/4099/4137/1630/1949/4133/26011/429/5789/5979/4988/11141/25893/9423/646/2258/1600/2243/6833/22891/5365/89/4803/7122/120892/114798/5139/1638/…
GO:0019081	BP	viral translation	18	-0.528645	-2.36064	0.000192007	0.00405307	0.00332301	8946	tags=100%, list=47%, signal=53%	55337/440275/9140/51386/8665/1939/8662/8661/1660/8562/6741/5094/5725/9474/8666/8664/28985
GO:0000974	CC	Prp19 complex	12	-0.606017	-2.03625	0.000195699	0.00411978	0.00337771	7477	tags=100%, list=39%, signal=61%	56949/51503/57461/25949/55696/10286/51340/5356/3312/988/27339
GO:0017046	MF	peptide hormone binding	52	0.630738	1.45488	0.000198386	0.00416503	0.00341481	3348	tags=52%, list=18%, signal=43%	887/6344/2740/7434/117/4883/5746/9340/2690/1395/886/5745/799/2587/1394/2642/553/1393/4881/1910/3953/3061/2692/552/10267/2825/5021
GO:0016528	CC	sarcoplasm	78	0.578283	1.35583	0.00020292	0.00424871	0.00348342	3710	tags=44%, list=20%, signal=35%	7060/4842/845/6547/5350/6261/10345/57338/816/844/202333/57158/84502/781/10335/6444/6271/9472/6345/6263/2946/6517/10324/51655/2281/123722/417/4208/3708/126306/3270/6262/6695/7057
GO:0001539	BP	cilium or flagellum-dependent cell motility	149	0.527721	1.26706	0.000211989	0.00441473	0.00361953	6513	tags=61%, list=34%, signal=40%	338/6869/84229/54514/9104/27285/1769/92749/8911/480/22873/1672/144535/127602/257062/80258/401024/79582/81492/387712/203074/79645/152015/27019/63978/51314/8701/9148/154313/5360/147700/83853/57119/146754/6870/117144/164714/85413/255101/246176/126820/221481/64518/144406/11189/79925/56171/6865/255061/1235/54777/284067/378807/345895/285335/159686/5414/146279/9389/257044/164395/9576/493/133308/8632/176…
GO:0060285	BP	cilium-dependent cell motility	149	0.527721	1.26706	0.000211989	0.00441473	0.00361953	6513	tags=61%, list=34%, signal=40%	338/6869/84229/54514/9104/27285/1769/92749/8911/480/22873/1672/144535/127602/257062/80258/401024/79582/81492/387712/203074/79645/152015/27019/63978/51314/8701/9148/154313/5360/147700/83853/57119/146754/6870/117144/164714/85413/255101/246176/126820/221481/64518/144406/11189/79925/56171/6865/255061/1235/54777/284067/378807/345895/285335/159686/5414/146279/9389/257044/164395/9576/493/133308/8632/176…
GO:0016529	CC	sarcoplasmic reticulum	71	0.585956	1.37109	0.000214257	0.00444999	0.00364844	4263	tags=46%, list=22%, signal=36%	7060/4842/845/5350/6261/10345/57338/816/844/202333/57158/84502/781/10335/6444/6271/9472/6345/6263/2946/6517/10324/51655/2281/123722/417/3708/126306/3270/6262/7057/100507027/497190
GO:0016055	BP	Wnt signaling pathway	433	0.477004	1.17465	0.000216524	0.00448505	0.00367719	4353	tags=31%, list=23%, signal=25%	1501/22943/5563/2348/6422/6425/51473/7476/4653/2255/340419/8796/63923/11197/6424/284654/343637/1950/28999/2719/152573/9241/22881/6423/144165/1363/2735/205147/25928/4693/57216/84870/7483/7484/1813/4920/145258/9096/1000/27120/388336/26108/25806/27303/147906/2247/1749/387914/2262/26585/9863/56033/4139/80114/83439/54361/388630/166336/120892/51704/25937/80319/23072/8434/8532/23500/80199/27123/7477/191…
GO:0097014	CC	ciliary plasm	131	0.536316	1.28076	0.000218791	0.00450495	0.0036935	6348	tags=60%, list=33%, signal=40%	51473/200162/200373/89876/1641/54768/374407/10382/7802/1769/92749/2735/83538/55259/55130/132851/144535/1770/127602/79659/80258/79582/199221/64446/81492/160762/27019/115948/85452/124602/2737/51314/8701/154313/146754/348807/164714/126820/144406/56171/94137/123872/57576/54777/92104/345895/57096/93233/57539/9576/167691/8632/1767/83450/6101/55329/26074/118491/55567/158297/25790/158067/22920/346562/144…
GO:0004549	MF	tRNA-specific ribonuclease activity	14	-0.59906	-2.21549	0.000219126	0.00450495	0.0036935	7610	tags=100%, list=40%, signal=60%	10556/51367/79042/80746/60528/11102/9692/79897/10557/10248/54913/10799/10940
GO:0008066	MF	glutamate receptor activity	27	0.704021	1.56379	0.000219229	0.00450495	0.0036935	2961	tags=63%, list=16%, signal=53%	2903/2894/2891/2913/2901/2899/2898/2917/2893/2914/2890/2900/2892/2895/2916/2915/2911
GO:0010225	BP	response to UV-C	13	-0.612701	-2.18165	0.000220567	0.00451857	0.00370467	7351	tags=100%, list=39%, signal=61%	4216/7528/602/7486/123879/2073/5429/114769/138162/578/675/7157
GO:0022804	MF	active transmembrane transporter activity	387	0.483217	1.1878	0.000221058	0.00451857	0.00370467	5939	tags=40%, list=31%, signal=28%	10351/55117/6564/477/6528/1811/10350/10568/340273/57030/55089/23460/9058/389015/60482/246213/6547/6538/353189/284111/114571/6543/154664/491/6512/84239/6508/220963/115111/64241/480/6555/9154/201780/79901/9194/6579/24/6506/340024/479/6559/115584/57419/6540/28968/222962/50651/10349/200010/160728/94160/10060/10991/8671/115019/6578/6833/10864/5244/1339/9153/53919/6511/6530/6570/6521/153201/6567/492/37…
GO:1902224	BP	ketone body metabolic process	10	0.836957	1.66252	0.000240457	0.00490215	0.00401916	654	tags=40%, list=3%, signal=39%	3158/54511/7306/79611
GO:0015698	BP	inorganic anion transport	180	0.515074	1.24523	0.000243798	0.00494424	0.00405367	5953	tags=50%, list=31%, signal=35%	203859/6528/2567/1811/10568/6424/63982/2569/57030/2566/2556/1188/1179/11095/846/2743/6508/115111/5348/2561/8001/1187/2558/55879/6559/10060/8671/115019/121601/56923/5593/2554/2568/54102/266675/6521/375611/6557/9376/57348/1180/2915/10316/6569/144453/9635/2562/2564/2565/9356/10786/57282/5243/2741/1193/760/94015/7038/83697/200959/5167/50636/2559/57101/8074/7809/55867/54831/284129/150160/26266/2570/25…
GO:0098656	BP	anion transmembrane transport	245	0.499878	1.21773	0.000243798	0.00494424	0.00405367	5328	tags=42%, list=28%, signal=31%	2348/203859/477/6528/2567/1811/63982/2569/57030/2566/2556/9058/389015/84889/246213/284111/6542/114571/11095/846/2743/6512/6508/115111/2561/9194/8001/4036/183/2558/6506/55879/6519/6559/57419/6540/160728/10991/8671/115019/121601/10864/6511/2554/2568/6521/2670/375611/6557/9376/64849/1180/2915/285195/6569/120103/2911/54716/2562/159963/2564/2565/5999/9356/123041/25769/9963/57282/2350/5243/4923/387700/…
GO:0009982	MF	pseudouridine synthase activity	13	-0.607316	-2.16248	0.000246516	0.00498632	0.00408816	7453	tags=92%, list=39%, signal=56%	126789/83480/83448/285367/142940/84881/27079/80324/26995/54517/113000/1736
GO:0032589	CC	neuron projection membrane	58	0.606213	1.40568	0.000257468	0.0051808	0.00424761	4559	tags=60%, list=24%, signal=46%	3745/2567/84059/2566/2556/729993/8516/491/6092/24141/388336/440829/2852/2558/6506/3746/8910/4137/2890/4985/4988/2554/4355/9750/6870/2564/2565/3748/3747/2550/729956/7399/2559/90249/23136
GO:0009581	BP	detection of external stimulus	135	0.536227	1.28217	0.000257468	0.0051808	0.00424761	5817	tags=57%, list=31%, signal=40%	2792/3249/4804/84059/114780/63982/54112/23349/3736/2898/1258/3815/1000/79054/24/3356/80036/6785/5961/5957/51761/168507/4914/5158/6121/6323/222662/3000/5270/23418/63895/2916/10893/57010/2294/94233/388531/796/131890/54437/7287/342372/6387/7852/123041/25769/6247/84694/7273/4923/79955/7222/117531/2779/161497/5311/58473/859/27039/117532/23621/6295/6101/25861/6010/7442/56925/10002/2534/55584/50508/9293…
GO:0004497	MF	monooxygenase activity	100	0.553931	1.31228	0.000262025	0.00523172	0.00428936	6287	tags=62%, list=33%, signal=42%	5740/1583/4842/1586/7306/5053/1545/392636/1559/9023/1646/26002/1582/339761/1580/1589/7166/1557/1591/2327/54905/10858/1579/1543/1548/6718/9420/121278/1555/1553/1558/10826/1549/113612/11283/1544/340665/64816/1581/1645/2330/1562/1588/1592/1572/1571/55586/284541/4846/2326/51302/1621/1551/1576/1585/2328/2329/1584/8564/57834/126410/1593
GO:0005930	CC	axoneme	130	0.537928	1.28453	0.000262025	0.00523172	0.00428936	6348	tags=61%, list=33%, signal=41%	51473/200162/200373/89876/1641/54768/374407/10382/7802/1769/92749/2735/83538/55259/55130/132851/144535/1770/127602/79659/80258/79582/199221/64446/81492/160762/27019/115948/85452/124602/2737/51314/8701/154313/146754/348807/164714/126820/144406/56171/94137/123872/57576/54777/92104/345895/57096/93233/57539/9576/167691/8632/1767/83450/6101/55329/26074/118491/55567/158297/25790/158067/22920/346562/144…
GO:0009566	BP	fertilization	192	0.510471	1.23662	0.000262025	0.00523172	0.00428936	5695	tags=45%, list=30%, signal=32%	338/2348/5104/22999/91646/1047/27443/367/79400/23627/2743/480/27120/54742/7455/158062/126206/84944/49/341277/122402/64753/203074/4753/246777/153218/2352/56979/152015/148281/4033/147650/63978/56159/81623/64100/8912/57731/3236/339168/668/22917/11055/10388/85413/317719/6690/26998/2350/8399/26206/283471/390243/494551/2741/8747/7222/57113/340069/256710/203102/100131137/148229/5327/10361/2515/284359/70…
GO:0010765	BP	positive regulation of sodium ion transport	32	0.681383	1.52944	0.00027141	0.00540517	0.00443157	1932	tags=34%, list=10%, signal=31%	1272/486/4842/6331/6330/55800/482/5348/2257/1756/65267
GO:0030195	BP	negative regulation of blood coagulation	48	0.620915	1.42623	0.000275696	0.00546244	0.00447852	4753	tags=65%, list=25%, signal=49%	7448/2266/5624/2147/170692/2160/5340/3827/3848/350/5156/2243/5270/2244/7035/3273/5592/5627/710/5345/1361/7057/5054/7056/2811/5327/239/5055/3818/947/4846
GO:0010469	BP	regulation of signaling receptor activity	156	0.527425	1.26901	0.000275696	0.00546244	0.00447852	5932	tags=51%, list=31%, signal=36%	64388/22943/22871/5649/4884/8000/27092/124857/1950/729993/9228/23467/9241/66004/799/9229/23641/27120/150/388336/23542/440829/23237/154/4988/26585/50944/146395/1393/27123/151647/59284/58512/152/9148/54413/130574/186/4208/57555/1742/25927/123041/5028/1081/4062/131/1612/2213/5054/2069/27091/10368/729230/859/10268/151/729956/59272/81832/85358/399968/10369/1392/5923/2100/6347/8829/254263/149111/653361…
GO:0005604	CC	basement membrane	94	0.564957	1.33461	0.000280253	0.00553856	0.00454093	4990	tags=57%, list=26%, signal=43%	341640/22854/7060/26033/23671/1286/2192/1285/83872/1287/1288/1280/80144/158326/375567/1297/151887/1946/64093/3908/4917/9423/1296/1295/43/340706/166752/8577/5176/64094/7078/333/401138/59277/9510/8292/2200/30008/79812/22798/4016/27283/3915/667/1299/126147/3911/7399/3339/4811/84628/7058/3910/133584
GO:0099094	MF	ligand-gated cation channel activity	115	0.545441	1.2994	0.000284809	0.0056143	0.00460303	5815	tags=63%, list=31%, signal=44%	10021/2903/2891/3773/6261/22953/2901/2899/2898/54714/6338/6340/1258/3359/79054/2893/55283/1261/5023/2890/1137/9992/3768/3763/10060/3780/6833/51555/170572/2900/9177/1141/1143/2892/285242/8973/6263/9127/348980/3757/55515/81033/1136/2281/3708/6262/1142/90134/1145/3782/1144/610/2897/5311/3764/5026/51802/357/3765/7442/6339/22821/55584/1135/358/1139/8989/3769/200909/3761/3758/1262
GO:1990173	BP	protein localization to nucleoplasm	14	-0.593361	-2.19442	0.000288323	0.00565783	0.00463872	1538	tags=64%, list=8%, signal=59%	7203/10576/6950/908/10575/22948/10694/10574/1736
GO:0090085	BP	regulation of protein deubiquitination	12	-0.59393	-1.99563	0.000289023	0.00565783	0.00463872	7706	tags=100%, list=41%, signal=59%	10010/83737/57599/29997/54726/10318/9733/80149/11315/7415/6737
GO:0001527	CC	microfibril	12	0.808154	1.64439	0.000289209	0.00565783	0.00463872	3260	tags=83%, list=17%, signal=69%	4239/8076/79875/81794/4052/4237/2201/8425/2200/30008
GO:0001941	BP	postsynaptic membrane organization	36	0.654529	1.47805	0.000293923	0.00569256	0.00466719	4395	tags=58%, list=23%, signal=45%	22871/5649/4593/9378/2743/9379/57502/1000/388336/5913/375323/51201/2668/54413/8292/57555/1742/8326/729956/64101/85358
GO:1900046	BP	regulation of hemostasis	68	0.589438	1.37526	0.000293923	0.00569256	0.00466719	4978	tags=59%, list=26%, signal=44%	1311/7448/2266/5624/2147/170692/2160/5340/3827/7166/3848/350/5156/2243/6484/2155/5270/948/2244/462/7035/3273/5592/5627/710/5345/857/1361/7057/5054/7056/2811/5327/239/5055/3818/2149/947/4846/6915
GO:0150063	BP	visual system development	380	0.478883	1.1772	0.000293923	0.00569256	0.00466719	6839	tags=51%, list=36%, signal=33%	91851/341640/2792/8854/7275/7476/2255/4081/57110/6496/5950/340273/362/1641/6297/57030/1545/84189/8076/246213/6096/2823/2202/1735/54549/491/91156/56853/121643/658/7111/11081/170692/4693/23363/10218/1826/7483/4915/7484/1813/5308/146862/27151/64093/25806/4760/2247/718/9573/7068/654/1543/5979/5961/5156/155051/343035/5915/51761/10586/1296/2295/1295/43/7021/5158/220/6121/11023/1410/64805/7477/2254/5754…
GO:0004175	MF	endopeptidase activity	417	0.475202	1.16975	0.000293923	0.00569256	0.00466719	5724	tags=39%, list=30%, signal=28%	5225/3249/80332/6422/4057/5126/1511/26085/3240/64499/5624/2147/7177/1179/60676/171019/8745/11095/7092/1991/23430/4316/7345/1215/80070/170692/440854/92291/162494/5648/1510/89932/3026/2160/5340/8722/4018/79747/5644/5122/49/170690/339967/9099/100506742/341277/346702/203074/388630/8510/2159/11086/9427/2155/81794/5651/10753/414301/84000/643834/339501/147968/10893/8492/132724/716/118856/9510/11330/9635…
GO:0070816	BP	phosphorylation of RNA polymerase II C-terminal domain	13	-0.599504	-2.13466	0.000298442	0.00572285	0.00469202	7601	tags=100%, list=40%, signal=60%	23476/8621/2965/8812/51755/85313/1025/904/404672/902/2967/1022
GO:0001682	BP	tRNA 5'-leader removal	13	-0.599029	-2.13297	0.000298442	0.00572285	0.00469202	7610	tags=100%, list=40%, signal=60%	10556/51367/11102/9692/79897/6741/10557/10248/54913/10799/10940/138716
GO:0030677	CC	ribonuclease P complex	13	-0.599029	-2.13297	0.000298442	0.00572285	0.00469202	7610	tags=100%, list=40%, signal=60%	10556/51367/11102/9692/79897/54931/10557/10248/54913/10799/3028/10940
GO:0004298	MF	threonine-type endopeptidase activity	13	-0.598951	-2.13269	0.000298442	0.00572285	0.00469202	1305	tags=69%, list=7%, signal=65%	5694/5690/5693/5689/5685/5695/5699/5698/5696
GO:0044325	MF	transmembrane transporter binding	126	0.539337	1.2874	0.000303037	0.00579661	0.0047525	4222	tags=38%, list=22%, signal=30%	140730/57628/3745/22999/4842/287/88/6331/6330/55800/30820/9699/846/10345/5348/2273/27133/644139/219527/3746/2257/9992/2258/10060/6833/89/120892/9472/9001/126755/57010/6769/6336/2281/93107/3270/6262/6640/23704/857/3747/6324/2316/3752/6546/7881/5311/859
GO:0070839	BP	metal ion export	46	0.629118	1.44122	0.000316707	0.00604318	0.00495466	4749	tags=54%, list=25%, signal=41%	3745/477/486/343450/6543/482/480/5348/479/9992/3737/8671/492/3741/3757/495/123041/23704/496/3752/478/6546/23630/30819/4878
GO:0072080	BP	nephron tubule development	91	0.563111	1.3291	0.000321264	0.00610008	0.00500131	5793	tags=57%, list=31%, signal=40%	80000/2719/9241/10736/7484/6608/5455/183/2247/26585/79191/170690/54361/130497/7021/25937/7477/2138/6943/26249/5076/2668/2737/7471/7482/9788/79192/186/4208/26508/7475/8642/8842/5087/30812/3237/9500/5311/6299/7490/7481/6469/3911/2246/51804/4853/5727/4070/650/255743/2625/3975
GO:0001654	BP	eye development	376	0.477137	1.17286	0.000321264	0.00610008	0.00500131	6839	tags=51%, list=36%, signal=33%	91851/341640/2792/8854/7275/7476/2255/4081/57110/6496/5950/340273/362/1641/6297/57030/1545/84189/8076/246213/6096/2823/2202/1735/54549/491/91156/56853/121643/658/7111/11081/170692/4693/23363/10218/1826/7483/4915/7484/1813/5308/146862/27151/64093/25806/4760/2247/9573/7068/654/1543/5979/5961/5156/155051/343035/5915/51761/10586/1296/2295/1295/43/7021/5158/220/6121/11023/1410/7477/2254/57545/5176/507…
GO:0060076	CC	excitatory synapse	51	0.622954	1.43681	0.000325821	0.00615643	0.00504751	4699	tags=69%, list=25%, signal=52%	22871/152404/440279/57030/246213/2891/491/57502/388336/6857/2890/50944/27255/79953/492/2892/2895/9127/54413/8927/869/23208/57555/1742/794/27286/114/26045/10368/729956/64101/81832/6855/23022/10458
GO:0030239	BP	myofibril assembly	64	0.592012	1.37764	0.000325821	0.00615643	0.00504751	6275	tags=72%, list=33%, signal=48%	4629/88/25802/7140/11155/7111/84665/5239/23363/2318/844/5156/4703/51778/80206/10398/84033/79933/58529/91807/10324/1466/70/27063/4892/7273/7139/4624/29767/859/1073/58/7138/51804/56203/5159/825/9172/4205/1906/4633/4621/1465/7168/11214/442721
GO:0001708	BP	cell fate specification	94	0.561832	1.32722	0.000330378	0.00621223	0.00509326	6292	tags=65%, list=33%, signal=44%	22943/4916/3226/367/23040/2139/6423/8643/10736/6910/145258/6608/9096/54738/2247/26011/429/9496/2138/2736/50846/5076/63978/6913/2737/3236/58524/63950/79923/120237/3670/6657/4838/8320/57057/6862/8324/5457/10716/30012/6899/3549/64843/170825/7481/6469/64321/6909/5454/5727/8829/167826/6911/4633/3169/8543/54345/5460/23269/7474/89780
GO:0060993	BP	kidney morphogenesis	93	0.560173	1.32316	0.000330378	0.00621223	0.00509326	5924	tags=59%, list=31%, signal=41%	80000/2066/2255/2719/9241/10736/80144/2302/7484/6608/183/2247/26585/79191/170690/54361/130497/120892/25937/7477/2138/6943/26249/5076/2668/2737/7471/7482/79192/51301/655/186/7475/8642/5087/30812/3237/9500/5311/6299/7490/7481/6469/3911/2246/51804/5727/5159/4070/650/10409/255743/2625/3975/9245
GO:0008217	BP	regulation of blood pressure	180	0.512894	1.23996	0.000334935	0.00626749	0.00513856	6197	tags=58%, list=33%, signal=39%	1268/4886/9370/2740/1113/477/185/6869/1511/4842/4883/367/1359/155/2837/29953/1215/554/4852/22953/10391/1813/80763/148/290/183/9365/5023/206338/154/1579/9607/2642/170690/5020/146/553/3952/6866/4881/1910/1816/59/147/5443/796/2982/10699/4879/6870/257313/552/186/55328/5021/5345/551/680/255061/4923/1908/4987/3817/10266/80852/7137/4624/151/2784/1909/59272/7424/5742/354/7026/59342/4882/2149/947/4878/484…
GO:0048638	BP	regulation of developmental growth	310	0.486152	1.1913	0.000334935	0.00626749	0.00513856	6653	tags=51%, list=35%, signal=33%	4886/4593/9723/223117/2066/3479/22999/2045/221476/5950/23105/23566/367/8153/3776/6860/7143/2690/4880/84258/9699/1735/1382/9241/3897/23414/1852/2735/57611/1826/6910/1813/6608/91584/1946/6857/4099/2593/2247/4137/1630/4133/154/84944/9423/51761/2258/9362/89/4803/8200/3952/10439/26281/3481/9856/2254/57556/56920/9472/344901/51760/59284/6531/84525/10500/23111/58529/5617/57731/2692/6532/6665/6585/5802/54…
GO:0060314	BP	regulation of ryanodine-sensitive calcium-release channel activity	26	0.696323	1.54002	0.000340854	0.00636288	0.00521677	4148	tags=58%, list=22%, signal=45%	4842/845/5350/10345/57338/57158/84502/1756/9472/2946/2281/126306/3270/1193/5311
GO:0048754	BP	branching morphogenesis of an epithelial tube	148	0.527103	1.26581	0.000344049	0.00640708	0.00525301	5831	tags=51%, list=31%, signal=36%	64478/64399/9723/80000/2255/340419/151449/5314/367/9353/5241/1950/2719/846/9241/6423/10736/7484/6608/183/2247/26585/170690/54361/2099/2138/6943/2736/5076/2668/2737/4776/2294/7471/2303/9620/7482/655/186/7475/8642/5087/57057/30812/6356/3237/54922/9500/3549/3202/5311/6299/859/7490/1909/6469/3911/7075/2246/51804/6909/5727/25932/51176/4070/8829/4855/7048/650/2022/255743/1906/284217/3169/3975/2263
GO:0098900	BP	regulation of action potential	53	0.623657	1.44029	0.000348605	0.00647637	0.00530982	3659	tags=40%, list=19%, signal=32%	1268/3745/10021/6869/287/6331/1269/6543/9096/148/781/29119/2257/2258/1141/948/775/6262/857/4923/2316
GO:0016282	CC	eukaryotic 43S preinitiation complex	17	-0.507286	-2.15459	0.000352475	0.00653259	0.00535591	9350	tags=100%, list=49%, signal=51%	10289/8663/51386/8665/8662/8661/10209/54505/8669/8666/27335/8668/8664/8667/10480/3646
GO:0097164	BP	ammonium ion metabolic process	23	0.708319	1.54571	0.000354224	0.00654934	0.00536964	3035	tags=52%, list=16%, signal=44%	2903/590/133121/3067/7166/285671/222962/5153/29958/121278/6581/7200
GO:0032590	CC	dendrite membrane	41	0.638986	1.45225	0.000366833	0.00676632	0.00554754	3614	tags=59%, list=19%, signal=47%	3745/2567/2566/2556/729993/8516/491/24141/388336/440829/2852/2558/3746/8910/2890/4985/4988/2554/4355/6870/2564/2565/3748/3747
GO:0018958	BP	phenol-containing compound metabolic process	111	0.548364	1.30418	0.000375947	0.00691795	0.00567186	4366	tags=49%, list=23%, signal=38%	3249/6528/2903/7306/5053/1735/26002/1610/4852/9627/4948/7173/9464/1813/3067/2304/7220/90527/2861/7166/9365/285671/4129/6622/5153/53919/1638/121278/6567/1141/4881/50506/3642/6531/1812/1428/405753/6870/1734/7042/51301/1081/5071/53905/6799/1733/5409/10404/7038/9839/6620/1571/1909/1513
GO:0071006	CC	U2-type catalytic step 1 spliceosome	12	-0.586909	-1.97204	0.000384638	0.00704443	0.00577556	7839	tags=100%, list=41%, signal=59%	54883/23020/57703/10594/22794/57461/55696/55110/9775/55702/27339
GO:0071012	CC	catalytic step 1 spliceosome	12	-0.586909	-1.97204	0.000384638	0.00704443	0.00577556	7839	tags=100%, list=41%, signal=59%	54883/23020/57703/10594/22794/57461/55696/55110/9775/55702/27339
GO:0033555	BP	multicellular organismal response to stress	73	0.577777	1.3532	0.000389617	0.00711879	0.00583652	3257	tags=42%, list=17%, signal=35%	5649/7060/477/6869/6863/3158/5179/117/4842/22953/1620/2898/3358/150/23542/2558/644139/5979/6335/4914/56923/6530/9856/1910/1812/55515/7101/796/27136/5582/4208
GO:0032098	BP	regulation of appetite	21	0.726324	1.57511	0.000391573	0.00713769	0.00585202	3422	tags=62%, list=18%, signal=51%	6344/4852/3358/80763/4988/9607/3360/6343/3952/85569/6581/5443/51738
GO:0001664	MF	G protein-coupled receptor binding	282	0.494711	1.20879	0.000394174	0.00716823	0.00587706	6323	tags=49%, list=33%, signal=33%	7032/887/6422/185/6863/7275/7476/4653/5179/283869/6366/6363/5731/9547/116/284654/10886/5064/2695/7345/8643/2775/4852/4693/84870/7483/9455/7484/65055/4920/150/183/4295/1672/54550/718/5368/114131/4922/135138/51308/9863/25817/6358/54361/5020/50944/51704/6343/54102/5697/7477/1910/2774/2770/333/100506013/2641/2915/6360/152/7471/5443/170589/2781/796/797/1524/51384/257313/1901/5196/6387/552/7482/114928/…
GO:0006721	BP	terpenoid metabolic process	96	0.556951	1.31751	0.000403288	0.00731679	0.00599886	4825	tags=48%, list=25%, signal=36%	125/9227/8854/7276/1381/3158/5950/126/1545/1559/1382/127/124/339761/4036/24/1557/54905/195814/1543/145226/220/6121/54658/6017/54577/1558/441282/57016/1544/340665/1645/131/5406/5947/216/1562/1592/1571/4035/231/5919/59342/50700/5948/83875
GO:0032414	BP	positive regulation of ion transmembrane transporter activity	105	0.550892	1.30785	0.000412402	0.00740667	0.00607255	5695	tags=51%, list=30%, signal=36%	5649/27092/486/287/88/3736/9104/482/10345/844/57158/644139/219527/3746/781/23237/154/1756/9992/6833/65267/342667/9472/2946/9001/126755/6769/54413/783/30845/5174/57463/6262/51083/5243/3747/4923/144245/10368/729230/5311/1909/85358/3306/10369/30819/4878/5336/6347/54997/1815/1906/84766/7225
GO:0060485	BP	mesenchyme development	289	0.489392	1.19623	0.000412402	0.00740667	0.00607255	6292	tags=50%, list=33%, signal=34%	2348/3249/9723/223117/6422/8854/2066/2255/55273/55698/9241/6423/10736/23414/140628/6092/9464/6910/5308/145258/6608/1000/147906/221662/54796/4222/55211/5979/72/26585/653/2042/4139/9965/54361/130497/2651/2295/8929/90102/202151/25937/80199/2260/10439/1910/6943/2254/6317/57556/56920/5076/8092/3082/2668/10979/10500/59/6939/2043/3084/2294/2487/54437/2303/51384/7042/7041/340665/70/3670/655/753/4208/2650…
GO:0045177	CC	apical part of cell	422	0.473226	1.16459	0.000412402	0.00740667	0.00607255	6305	tags=46%, list=33%, signal=31%	7348/7018/2348/3249/84417/6564/146894/1811/10568/362/287/5314/389015/3776/1271/89872/60676/50617/846/8516/3736/491/482/11136/5745/22953/6514/340990/4118/57216/64241/9455/5348/6338/10804/6340/6555/3938/2813/338328/1000/79901/10752/4036/359/29881/3778/9365/340024/525/479/79659/6519/6559/154/1579/10149/140803/222962/7380/160728/10991/8777/115019/1087/5244/222662/5593/6567/6557/9376/54825/948/8470/15…
GO:0097386	CC	glial cell projection	33	0.656194	1.47414	0.000412814	0.00740667	0.00607255	2705	tags=42%, list=14%, signal=36%	6332/3776/6860/246213/2913/482/361/23114/1261/6506/4137/2670/23418/2915
GO:0034719	CC	SMN-Sm protein complex	17	-0.502891	-2.13592	0.000413022	0.00740667	0.00607255	4942	tags=94%, list=26%, signal=70%	79760/6606/25929/79833/54960/6633/8487/11218/6632/6634/50628/6637/6636/6635/11171/6628
GO:0051047	BP	positive regulation of secretion	295	0.488936	1.19555	0.000416959	0.00744151	0.00610112	6212	tags=45%, list=33%, signal=31%	1268/22871/640/3745/2850/169026/6869/9971/3479/3623/222546/5950/116/2266/6860/7432/846/2695/341359/8911/8913/143425/1813/8736/2587/2922/322/25924/2645/2852/183/6857/4986/114131/6622/1579/654/8431/8941/9607/5122/2243/43/4628/5020/8618/6343/553/3952/57126/1141/4881/1910/114899/2822/2668/388581/8647/2244/5319/2623/8912/2641/5617/2692/201294/6532/783/668/4879/7200/7042/6387/552/27063/3670/57555/8938/…
GO:0043410	BP	positive regulation of MAPK cascade	473	0.469441	1.15796	0.000416959	0.00744151	0.00610112	6909	tags=51%, list=36%, signal=33%	22943/4916/55532/7476/2066/3479/2255/284340/6366/6363/10178/116/23566/367/2266/1950/2690/155/392255/7066/846/1991/22881/4852/799/3358/4915/9464/1813/9590/3815/4920/148/1000/150/2322/23542/2852/2861/54550/4986/115352/9365/2247/2914/3356/4889/84432/389658/154/5979/238/4988/388121/9607/80310/5156/9965/55024/6358/7164/2243/2651/4914/1902/9479/146/5322/168667/120892/2046/553/151306/3952/2260/7477/2628…
GO:0070993	CC	translation preinitiation complex	18	-0.507313	-2.26538	0.000417847	0.00744151	0.00610112	9350	tags=94%, list=49%, signal=48%	10289/8663/51386/8665/8662/8661/10209/54505/8669/8666/27335/8668/8664/8667/10480/1965/3646
GO:1903532	BP	positive regulation of secretion by cell	269	0.489875	1.1959	0.000426072	0.0075706	0.00620695	6212	tags=45%, list=33%, signal=31%	1268/22871/640/3745/2850/169026/6869/9971/3479/3623/222546/5950/116/2266/6860/7432/846/2695/341359/8911/8913/143425/1813/8736/2587/2922/322/25924/2645/2852/183/6857/4986/114131/6622/654/8431/8941/9607/5122/2243/43/4628/5020/8618/6343/553/3952/57126/1141/114899/2822/2668/388581/2244/5319/2623/8912/2641/2692/201294/6532/783/668/7200/7042/6387/552/27063/3670/57555/8938/5021/6690/8447/5028/51738/551/…
GO:2000027	BP	regulation of animal organ morphogenesis	129	0.536019	1.28003	0.000435186	0.00771484	0.00632521	6292	tags=57%, list=33%, signal=39%	22943/4804/6422/7476/2255/340419/5314/367/2719/9241/22881/6423/144165/10736/140628/6092/57216/84870/7484/4920/6608/2252/183/79864/2247/26585/9863/54361/166336/10082/5076/3082/2668/59277/58524/57664/9620/7482/4919/3227/655/186/7074/80326/6091/30812/4982/8324/9500/51339/6899/859/7490/2535/7481/6469/2246/51804/947/8321/55966/4070/650/1601/1906/2625/3975/115908/23213/25876/147495/7474/85407/89780
GO:0033293	MF	monocarboxylic acid binding	79	0.570439	1.3388	0.000439743	0.00776011	0.00636233	5222	tags=48%, list=28%, signal=35%	5104/9227/2938/1381/9971/213/2167/1382/1646/174/5375/5730/339761/54905/116362/54658/2170/54577/2946/5319/83758/55289/340665/32/1645/5947/2168/173/1592/2853/7026/165140/8309/5948/5836/7350/54576/5091
GO:0005179	MF	hormone activity	119	0.544674	1.29861	0.000439743	0.00776011	0.00636233	7012	tags=71%, list=37%, signal=45%	6750/9370/7276/1114/3479/5179/3623/116/7432/7066/4880/252995/2695/4852/80763/2922/183/4295/9365/5368/114131/4922/9607/5020/94027/5744/6343/5697/338872/3952/85569/3481/344901/3626/388581/100506013/2641/5617/5443/170589/796/797/2520/4879/7200/257313/2688/2200/375704/51738/1081/551/51083/1908/83729/5539/7038/3625/1082/3375/4878/1392/2797/2980/56729/4828/79924/1906/6019/7425/2689/434/117579/2691/3060…
GO:0010881	BP	regulation of cardiac muscle contraction by regulation of the release of sequestered calcium ion	20	0.724318	1.56402	0.000443286	0.00780485	0.00639901	3888	tags=60%, list=21%, signal=48%	477/845/287/5350/1756/2946/2281/775/3270/6262/1193/6546
GO:0015294	MF	solute:cation symporter activity	104	0.549957	1.30558	0.000448857	0.00788502	0.00646474	4166	tags=46%, list=22%, signal=36%	55117/6564/6528/10568/57030/9058/60482/6538/284111/6512/6555/9154/201780/6506/6559/115584/6540/50651/200010/160728/8671/9153/6511/6530/6570/153201/6557/64849/6531/6569/6554/6532/54716/6565/159963/125206/6571/81031/10786/9963/57282/10246/6539/113235/6527/83733/83697/9152
GO:0098563	CC	intrinsic component of synaptic vesicle membrane	40	0.639208	1.45112	0.000453414	0.00794705	0.00651559	2230	tags=38%, list=12%, signal=33%	115827/57030/6860/246213/9145/143425/22987/5865/6857/4986/7781/4985/9900/81615/6853
GO:0030894	CC	replisome	15	-0.544268	-2.06682	0.000457497	0.00800052	0.00655943	1700	tags=60%, list=9%, signal=55%	5424/5425/5557/6119/5422/23649/5558/4172/5111
GO:0061005	BP	cell differentiation involved in kidney development	58	0.599048	1.38907	0.000462527	0.00802412	0.00657878	5793	tags=62%, list=31%, signal=43%	9370/28999/10736/2302/7484/6608/5455/26585/4868/9863/54361/130497/25937/1910/6943/5076/2668/84662/59/2737/2303/9788/4208/7827/8842/6299/7490/1909/6469/947/4853/5727/10409/3913/2625/3975
GO:0048857	BP	neural nucleus development	63	0.591712	1.37593	0.000462527	0.00802412	0.00657878	2313	tags=30%, list=12%, signal=27%	5354/93986/84623/284612/3211/9118/401/2247/3746/4129/1152/429/8941/8929/220/6271/3212/1141/2254
GO:0051924	BP	regulation of calcium ion transport	240	0.500926	1.22039	0.000462527	0.00802412	0.00657878	7040	tags=57%, list=37%, signal=37%	5354/477/117/4842/845/287/1950/59285/2147/846/5350/9104/10345/785/22953/57338/816/799/9455/844/57158/1813/84502/7220/150/2852/183/115352/5023/781/6622/1394/4985/5587/1756/9992/5957/6236/65267/4638/342667/930/9472/162514/786/1812/2946/2916/5319/9001/2641/6769/57165/151651/783/57119/30845/2281/6387/5999/9002/126306/6690/7852/2669/775/3270/6262/3603/857/4923/5294/4987/1193/2864/7222/6546/117531/1068…
GO:0010644	BP	cell communication by electrical coupling	32	0.67241	1.5093	0.00046299	0.00802412	0.00657878	3986	tags=56%, list=21%, signal=44%	477/845/3736/482/10345/10804/6910/79191/57165/2281/1627/775/3270/6262/857/478/6546/10052
GO:0098533	CC	ATPase dependent transmembrane transport complex	24	0.704041	1.54688	0.000464383	0.0080303	0.00658385	4248	tags=62%, list=22%, signal=49%	477/486/5350/482/64241/480/5348/479/10060/6833/53828/496/478/64240/3764
GO:0060048	BP	cardiac muscle contraction	130	0.532085	1.27058	0.000471686	0.00813842	0.0066725	4838	tags=46%, list=26%, signal=35%	6327/1113/477/10021/4842/845/287/6331/4634/6330/55800/5350/8913/7134/148/781/29119/2257/1756/9992/6444/2258/6323/4607/2946/3741/3757/147/783/6336/30845/2281/7852/775/3270/6262/6640/23704/857/7273/6324/2316/5294/3752/7139/1193/4635/6546/7137/10052/1490/4624/51086/859/3764/59272/23630/2934/4878/5997
GO:0098878	CC	neurotransmitter receptor complex	45	0.630658	1.44164	0.000480845	0.00822319	0.00674199	4586	tags=64%, list=24%, signal=49%	27092/2903/729993/2891/2901/2899/2898/375567/3359/2893/388336/440829/2890/170572/2900/126129/9177/2892/59284/118427/285242/2895/402117/1742/27091/10368/729956/93145/10369
GO:0007215	BP	glutamate receptor signaling pathway	52	0.618459	1.42655	0.000480845	0.00822319	0.00674199	2993	tags=44%, list=16%, signal=37%	23732/5354/3745/2903/2894/2891/2913/2901/2899/2898/9455/2917/2893/54550/2914/2890/2900/2892/2895/2916/2915/2911/4308
GO:0042626	MF	ATPase-coupled transmembrane transporter activity	90	0.553137	1.3046	0.000480845	0.00822319	0.00674199	5939	tags=47%, list=31%, signal=32%	10351/477/10350/340273/23460/154664/491/84239/64241/480/24/479/10349/94160/10060/6833/5244/492/344905/534/8647/495/64137/496/5243/225/478/64240/3764/493/21/9429/26154/368/85320/9619/1244/19/489/10057/155066/23457
GO:0060828	BP	regulation of canonical Wnt signaling pathway	245	0.494753	1.20525	0.000480845	0.00822319	0.00674199	4353	tags=31%, list=23%, signal=25%	1501/22943/2348/6422/6425/2255/340419/8796/63923/6424/284654/1950/2719/152573/9241/22881/6423/144165/2735/205147/25928/84870/4920/9096/1000/27120/388336/27303/147906/2247/1749/2262/26585/80114/120892/51704/25937/23072/8434/23500/80199/27123/3489/4163/2254/5218/3484/2737/92162/2487/57664/130574/10076/3670/6657/7162/219287/25960/8326/3087/857/100113407/5071/3485/85409/7480/1896/100507050/8324/51339…
GO:0010882	BP	regulation of cardiac muscle contraction by calcium ion signaling	24	0.70043	1.53895	0.000482774	0.00823799	0.00675413	3928	tags=54%, list=21%, signal=43%	477/845/287/5350/1756/2946/2281/775/3270/6262/1193/6546/7137
GO:0080009	BP	mRNA methylation	16	-0.514123	-1.96577	0.000486779	0.00828808	0.0067952	9220	tags=100%, list=49%, signal=51%	23091/115708/79066/23070/25962/57721/9589/55006/79828/56339/79872/54931/54888/51605/55783
GO:0010880	BP	regulation of release of sequestered calcium ion into cytosol by sarcoplasmic reticulum	28	0.676549	1.50908	0.000500161	0.00849726	0.0069667	3888	tags=54%, list=21%, signal=43%	477/845/287/5350/10345/844/1756/9472/2946/2281/775/3270/6262/1193/6546
GO:0086001	BP	cardiac muscle cell action potential	72	0.585763	1.37133	0.000517479	0.00877224	0.00719215	4693	tags=50%, list=25%, signal=38%	6327/477/10021/287/6331/6330/55800/6508/8913/9096/781/29119/2257/1756/9992/2258/6323/3741/3757/783/6336/775/6262/6640/23704/857/6324/2316/3752/6546/10052/610/859/3764/23630/30819
GO:0008090	BP	retrograde axonal transport	21	0.72194	1.5656	0.000520077	0.00879703	0.00721247	2630	tags=48%, list=14%, signal=41%	547/84871/4747/50632/3798/1740/84709/66000/4130/9001
GO:0031594	CC	neuromuscular junction	67	0.584972	1.36375	0.000535797	0.00902352	0.00739816	4725	tags=51%, list=25%, signal=38%	4593/440279/1674/2045/4747/1287/60482/6547/9145/81493/3908/5913/1740/9900/43/5270/23024/58512/2043/3084/1013/8292/1742/6640/23025/6695/1145/1144/859/3911/7402/7846/6855/2149
GO:0015108	MF	chloride transmembrane transporter activity	97	0.558434	1.32172	0.000535797	0.00902352	0.00739816	5676	tags=58%, list=30%, signal=41%	203859/2567/1811/63982/2569/2566/2556/1188/1179/2743/115111/5348/2561/8001/1187/2558/55879/6559/115019/121601/56923/2554/2568/54102/266675/6530/6570/6521/375611/6557/6531/57348/1180/144453/6532/9635/2562/2564/2565/6571/2741/1193/94015/200959/50636/2559/57101/7809/54831/2570/25932/2555/6560/2560/5172/9022
GO:0014068	BP	positive regulation of phosphatidylinositol 3-kinase signaling	76	0.577678	1.35406	0.000554114	0.00929161	0.00761797	3229	tags=38%, list=17%, signal=32%	5649/4916/4653/2066/3479/6403/1950/2147/4915/3815/4920/2322/2852/183/2247/80310/5156/1634/4914/3952/2260/284/3082/2492/7010/51384/7042/2688/4919
GO:0090090	BP	negative regulation of canonical Wnt signaling pathway	134	0.522967	1.25032	0.000554114	0.00929161	0.00761797	4353	tags=37%, list=23%, signal=29%	22943/6422/6425/63923/6424/2719/152573/9241/22881/6423/144165/2735/25928/4920/9096/1000/27120/388336/27303/147906/26585/80114/25937/23072/80199/27123/3489/4163/3484/2737/92162/2487/10076/3670/6657/7162/219287/857/100113407/5071/3485/85409/100507050/51339/3487/7481/102723796/6469/8322/64321
GO:2000001	BP	regulation of DNA damage checkpoint	16	-0.50953	-1.9482	0.000560953	0.00938596	0.00769532	9307	tags=100%, list=49%, signal=51%	10116/1407/5514/51776/7919/54465/9984/57805/6118/79621/8451/55159/26272/79968/11200
GO:1904315	MF	transmitter-gated ion channel activity involved in regulation of postsynaptic membrane potential	46	0.621542	1.42386	0.000563273	0.00940447	0.0077105	5547	tags=76%, list=29%, signal=54%	2567/2569/2566/2556/2894/2743/2901/2899/2898/2561/2558/2890/1137/2900/2554/1141/1143/2892/8973/2895/1136/2564/2565/1142/2741/1145/1144/2897/2559/2570/2555/55584/2560/1135/1139
GO:0032228	BP	regulation of synaptic transmission, GABAergic	34	0.654064	1.47454	0.00058159	0.00965757	0.00791801	4041	tags=56%, list=21%, signal=44%	1268/22871/6869/85445/8224/1269/23349/1813/148/266743/4889/3351/9001/57555/8938/5334/5021/760/23228
GO:0048562	BP	embryonic organ morphogenesis	291	0.48926	1.19604	0.00058159	0.00965757	0.00791801	6300	tags=51%, list=33%, signal=34%	2348/3249/53904/2255/7545/57453/6496/5950/84189/8076/64072/2202/8516/9241/1750/121643/5079/10736/1280/2735/348093/3211/57216/7484/9464/10804/4920/145258/6608/9096/2304/124590/25806/4760/525/1749/259236/51676/3201/5156/9423/5915/51761/130497/2295/3167/220/3233/222662/3199/51168/80199/3212/2138/6943/2254/60529/5076/2290/8092/3373/344022/65009/6913/2737/55084/3198/4237/2294/7471/3236/2487/3204/6474/…
GO:0099084	BP	postsynaptic specialization organization	33	0.65159	1.4638	0.000582172	0.00965757	0.00791801	4684	tags=64%, list=25%, signal=48%	22871/5649/4884/4916/22865/9378/2596/9379/1000/5789/94030/66000/2895/8506/869/57555/1742/26045/64101/85358/84628
GO:0019373	BP	epoxygenase P450 pathway	18	0.735822	1.57224	0.000588647	0.0097373	0.00798338	4169	tags=78%, list=22%, signal=61%	1545/1559/1557/1579/1543/1548/1555/1553/1558/1549/1544/1562/1572/1571
GO:2001259	BP	positive regulation of cation channel activity	70	0.582036	1.3615	0.000590749	0.0097373	0.00798338	4900	tags=56%, list=26%, signal=41%	5649/27092/287/88/3736/10345/844/57158/644139/219527/3746/781/23237/154/9992/6833/342667/9472/2946/9001/126755/6769/54413/783/30845/57463/51083/3747/4923/144245/10368/729230/5311/1909/85358/10369/30819/4878/5336
GO:0045055	BP	regulated exocytosis	232	0.494417	1.20302	0.000590749	0.0097373	0.00798338	5458	tags=42%, list=29%, signal=30%	1268/140730/27445/22871/440279/640/3745/1113/7476/22999/6854/6860/84258/9699/9145/341359/2901/6861/8911/6616/8913/143425/5730/1813/3815/148/150/6857/7166/5023/26059/3356/6622/5217/126206/9900/8941/3351/8618/120892/1393/8448/57126/6853/51760/148281/8973/1812/107/2623/8912/91683/2294/201294/320/83849/783/9381/5579/5413/23208/5582/8938/8447/5028/23025/10814/1142/5294/2213/85477/2242/729230/55503/192…
GO:0090288	BP	negative regulation of cellular response to growth factor stimulus	100	0.545034	1.2912	0.000599908	0.00984637	0.0080728	5796	tags=53%, list=31%, signal=37%	91851/64388/22943/4804/6422/9353/9241/6423/25928/348093/375567/8646/4036/183/2247/9573/387914/26585/54361/1634/168667/80199/57556/63978/23111/7471/10272/402117/164656/3273/2200/186/79812/25960/11117/3087/7057/10563/148738/3593/94031/652991/493/3565/8321/50964/3592/2817/55959/6498/2625/5654/57045
GO:1903169	BP	regulation of calcium ion transmembrane transport	147	0.523492	1.25674	0.000599908	0.00984637	0.0080728	7040	tags=60%, list=37%, signal=38%	5354/477/4842/845/287/59285/2147/5350/9104/10345/785/57338/799/844/57158/1813/84502/7220/150/2852/5023/781/6622/1394/5587/1756/9992/6236/342667/930/9472/786/1812/2946/9001/6769/57165/783/30845/2281/9002/126306/2669/775/3270/6262/4923/5294/4987/1193/6546/117531/10681/5311/187/859/10268/100507027/6375/117532/387129/28954/3306/2149/4878/201140/5336/825/2534/255057/1815/84766/79026/3596/623/1814/5142…
GO:0022010	BP	central nervous system myelination	22	0.71478	1.55333	0.000602919	0.00985404	0.00807909	3409	tags=45%, list=18%, signal=37%	5354/1272/6900/1191/4118/443/4099/26011/8506/3400
GO:0032291	BP	axon ensheathment in central nervous system	22	0.71478	1.55333	0.000602919	0.00985404	0.00807909	3409	tags=45%, list=18%, signal=37%	5354/1272/6900/1191/4118/443/4099/26011/8506/3400
GO:0006388	BP	tRNA splicing, via endonucleolytic cleavage and ligation	10	-0.662057	-2.02976	0.000606707	0.00988079	0.00810102	6414	tags=100%, list=34%, signal=66%	339487/79042/83707/80746/283989/51493/1653/10978/51637
GO:0070601	BP	centromeric sister chromatid cohesion	12	-0.570418	-1.91663	0.000607107	0.00988079	0.00810102	1281	tags=58%, list=7%, signal=54%	1499/151246/8260/151648/699/701/8313
GO:0001325	BP	formation of extrachromosomal circular DNA	15	-0.528719	-2.00777	0.000611213	0.00988532	0.00810473	8943	tags=100%, list=47%, signal=53%	84464/2067/548593/51750/7013/50485/7014/7486/641/7517/7520/4683/1763/9156
GO:0090656	BP	t-circle formation	15	-0.528719	-2.00777	0.000611213	0.00988532	0.00810473	8943	tags=100%, list=47%, signal=53%	84464/2067/548593/51750/7013/50485/7014/7486/641/7517/7520/4683/1763/9156
GO:0090737	BP	telomere maintenance via telomere trimming	15	-0.528719	-2.00777	0.000611213	0.00988532	0.00810473	8943	tags=100%, list=47%, signal=53%	84464/2067/548593/51750/7013/50485/7014/7486/641/7517/7520/4683/1763/9156
GO:0008395	MF	steroid hydroxylase activity	37	0.648199	1.46689	0.000618225	0.00989543	0.00811303	4169	tags=68%, list=22%, signal=53%	1583/1586/1545/1559/9023/1582/1589/1557/54905/10858/1543/1548/9420/1555/1553/1558/1549/113612/1544/64816/1581/1562/1588/1572/1571
GO:0042220	BP	response to cocaine	46	0.620525	1.42153	0.000618225	0.00989543	0.00811303	3610	tags=50%, list=19%, signal=41%	1268/27092/9455/1813/8128/4986/6506/3356/4988/2019/3351/5020/1996/1393/1141/1816/6531/1812/5309/6870/5999/5021/221935
GO:0048709	BP	oligodendrocyte differentiation	90	0.550416	1.29818	0.000618225	0.00989543	0.00811303	4325	tags=34%, list=23%, signal=27%	5354/1272/6900/5803/6547/1191/10810/4118/443/4915/4099/26011/429/22891/10100/23500/8506/2737/56978/146433/3084/93377/5764/7223/7852/3400/55553/30812/664/170825/6469
GO:0061138	BP	morphogenesis of a branching epithelium	180	0.509216	1.23107	0.000618225	0.00989543	0.00811303	6059	tags=49%, list=32%, signal=34%	64478/64399/9723/80000/6422/2255/340419/151449/5314/367/9353/5241/1950/2719/846/9241/6423/10736/84870/7484/6608/2252/183/2247/26585/170690/54361/2099/2138/6943/2736/5076/3082/2668/2737/4776/2294/7471/59277/2303/9620/7482/655/186/7475/8642/8626/5087/57057/30812/6356/3237/10371/54922/9500/8521/3549/3202/5311/6299/859/7490/1909/6469/3911/3239/7075/2246/51804/6909/5727/25932/51176/4070/8829/4855/7048…
GO:0015711	BP	organic anion transport	353	0.475444	1.16758	0.000618225	0.00989543	0.00811303	6196	tags=47%, list=33%, signal=32%	2348/28965/55117/56301/477/1811/1066/57030/9058/6860/84889/246213/6538/353189/284111/6542/114571/846/6512/11136/6508/6514/220963/115111/4915/1813/6555/201780/2917/9194/4036/183/6579/123264/6506/6519/6622/4889/1579/8431/9900/6540/144195/9965/160728/10991/3351/8671/115019/6578/10864/5244/5020/53919/5322/6511/56923/1378/553/2352/6005/3952/6521/153201/6567/2670/375611/387775/9122/948/64849/6581/10599…
GO:0032411	BP	positive regulation of transporter activity	116	0.53724	1.28004	0.000627384	0.0100213	0.00821624	5695	tags=49%, list=30%, signal=35%	9370/5649/27092/486/5444/287/88/3736/9104/482/10345/844/57158/644139/219527/3746/781/23237/154/1756/9992/6833/65267/342667/9472/2946/9001/126755/6769/54413/783/30845/10110/5174/57463/6262/51083/5243/3747/4923/144245/10368/729230/5311/1909/85358/3306/10369/30819/4878/5336/6347/54997/1815/1906/84766/7225
GO:0030277	BP	maintenance of gastrointestinal epithelium	22	0.712305	1.54795	0.000639738	0.0101976	0.0083608	1364	tags=32%, list=7%, signal=30%	7032/340547/4588/12/5950/7031/4760
GO:2000234	BP	positive regulation of rRNA processing	10	-0.659313	-2.02134	0.000644824	0.0102505	0.00840415	6466	tags=100%, list=34%, signal=66%	55127/51504/114049/83732/55781/84128/27292/84135/23160
GO:0015291	MF	secondary active transmembrane transporter activity	236	0.497283	1.21038	0.000645701	0.0102505	0.00840415	4168	tags=38%, list=22%, signal=30%	55117/6564/6528/1811/10568/57030/55089/9058/389015/60482/246213/6547/6538/353189/284111/114571/6543/6512/6508/220963/115111/6555/9154/201780/9194/6579/6506/340024/6559/115584/57419/6540/28968/50651/200010/160728/10991/8671/115019/6578/10864/9153/53919/6511/6530/6570/6521/153201/6567/375611/9122/6557/9376/64849/6531/10599/133482/285195/6569/6554/6532/120103/54716/6565/159963/125206/6571/9356/81031…
GO:0035136	BP	forelimb morphogenesis	38	0.641042	1.45299	0.00065486	0.0103157	0.00845757	3484	tags=47%, list=18%, signal=39%	8854/7476/7704/340419/494470/1382/6910/2019/130497/7021/8434/8200/60529/3236/6474/8626/775/257
GO:0005178	MF	integrin binding	156	0.519314	1.24949	0.00065486	0.0103157	0.00845757	6718	tags=59%, list=35%, signal=38%	2674/1311/7060/3479/7448/2192/63923/2208/7148/1285/8839/88/5803/85329/8745/11095/846/8516/6423/4856/8174/9358/58494/10516/2247/89/8515/60437/57126/2670/3674/3481/83700/10979/3680/3084/3681/3679/8838/6387/1842/5764/8425/2200/3491/11117/1903/10085/4185/8482/1758/3385/7057/959/53616/667/1490/7450/3384/1307/3911/2515/7412/7402/26548/7106/22801/4240/2246/3690/120425/8613/3684/1281/255743/3913/27329/36…
GO:0048207	BP	vesicle targeting, rough ER to cis-Golgi	15	-0.526819	-2.00055	0.000655132	0.0103157	0.00845757	8979	tags=100%, list=47%, signal=53%	1453/51128/10342/56681/10113/10972/8452/225689/9919/59349/10959/5537/89866/10016
GO:0048208	BP	COPII vesicle coating	15	-0.526819	-2.00055	0.000655132	0.0103157	0.00845757	8979	tags=100%, list=47%, signal=53%	1453/51128/10342/56681/10113/10972/8452/225689/9919/59349/10959/5537/89866/10016
GO:0005779	CC	integral component of peroxisomal membrane	15	-0.526132	-1.99795	0.000662452	0.0103887	0.00851744	8992	tags=100%, list=47%, signal=53%	5193/84188/92960/8504/5194/215/51024/9409/55670/5828/8799/10478/55711/11001
GO:0031231	CC	intrinsic component of peroxisomal membrane	15	-0.526132	-1.99795	0.000662452	0.0103887	0.00851744	8992	tags=100%, list=47%, signal=53%	5193/84188/92960/8504/5194/215/51024/9409/55670/5828/8799/10478/55711/11001
GO:0097120	BP	receptor localization to synapse	56	0.605436	1.40156	0.000664019	0.0103922	0.00852034	4701	tags=46%, list=25%, signal=35%	22871/5649/4884/9211/27092/56899/6616/3798/388336/1740/23426/10082/59284/3800/160622/1742/1627/57576/80852/27091/27065/10368/201134/81832/10369/57554
GO:0055002	BP	striated muscle cell development	65	0.590166	1.37381	0.000673178	0.0105143	0.00862044	6275	tags=71%, list=33%, signal=48%	4629/88/25802/7140/11155/7111/84665/5239/23363/2318/844/5156/4703/51778/80206/10398/84033/79933/58529/91807/10324/1466/70/27063/4892/7273/7139/4624/29767/859/1073/58/7138/51804/56203/5159/825/9172/4205/1906/4633/4621/1465/7168/11214/442721
GO:0030193	BP	regulation of blood coagulation	66	0.578605	1.34818	0.000682336	0.0106145	0.00870258	4978	tags=58%, list=26%, signal=43%	7448/2266/5624/2147/170692/2160/5340/3827/3848/350/5156/2243/6484/2155/5270/948/2244/462/7035/3273/5592/5627/710/5345/857/1361/7057/5054/7056/2811/5327/239/5055/3818/2149/947/4846/6915
GO:0007628	BP	adult walking behavior	30	0.65485	1.46621	0.000683019	0.0106145	0.00870258	4046	tags=53%, list=21%, signal=42%	7545/6900/7345/2743/1813/1949/1600/6323/1812/2043/57731/58524/7200/2636/2741/57626
GO:0007190	BP	activation of adenylate cyclase activity	29	0.679531	1.51753	0.000683702	0.0106145	0.00870258	4755	tags=72%, list=25%, signal=54%	2740/7434/116/155/554/154/1394/49/1816/1812/2692/10486/796/59350/2492/7253/122042/3973/1909/2696/153
GO:0045761	BP	regulation of adenylate cyclase activity	57	0.604151	1.39961	0.000691495	0.010714	0.00878417	4755	tags=60%, list=25%, signal=45%	2740/7434/4883/84059/116/10886/5064/155/2913/554/1813/2587/53836/154/9568/1394/49/1910/1816/1812/2692/10486/796/59350/2492/7253/122042/775/3973/2550/729230/1909/2696/153
GO:0061326	BP	renal tubule development	94	0.554745	1.31048	0.000700654	0.0108343	0.00888275	5793	tags=55%, list=31%, signal=39%	80000/2719/9241/10736/7484/6608/5455/183/2247/26585/79191/170690/54361/130497/7021/25937/7477/2138/6943/26249/5076/2668/2737/7471/7482/9788/79192/186/4208/26508/7475/8642/8842/5087/30812/3237/9500/5311/6299/7490/7481/6469/3911/2246/51804/4853/5727/4070/650/255743/2625/3975
GO:0099560	BP	synaptic membrane adhesion	25	0.691152	1.52343	0.00071266	0.010998	0.00901697	3056	tags=60%, list=16%, signal=50%	22871/22854/22865/145581/57689/5100/1946/5789/94030/84631/114798/8404/10082/5802/266727
GO:0010927	BP	cellular component assembly involved in morphogenesis	110	0.537594	1.2782	0.000718971	0.0110733	0.00907873	6275	tags=58%, list=33%, signal=39%	1272/4629/287/88/25802/7140/11155/7111/84665/5239/23363/6691/2318/844/400746/4099/26011/5156/4703/64753/51778/90102/80206/10398/84033/8506/79933/58529/91807/10324/1466/11055/70/27063/4892/7273/7139/23187/4624/3549/29767/859/1073/58/23136/7138/51804/56203/5159/825/5990/9172/2817/4205/5376/1906/4633/124626/4621/1465/7168/11214/11063/442721
GO:0040013	BP	negative regulation of locomotion	315	0.48	1.17616	0.00072813	0.0111921	0.00917614	7121	tags=53%, list=38%, signal=33%	347/9370/9723/11122/223117/4804/6422/23671/6366/2192/63923/340533/4223/9353/149461/127435/1545/10718/1991/9241/6423/9104/93649/482/6092/575/6910/1813/3036/8646/4856/50859/26228/2247/5217/89795/350/1809/26585/9863/653/25817/54361/1634/6833/51378/5365/7122/90102/54328/8434/3488/80199/89927/4163/57556/56920/5176/10500/65009/2043/3084/2915/3204/1524/6585/54437/9750/57119/6387/3273/5797/5592/10076/126…
GO:0051346	BP	negative regulation of hydrolase activity	348	0.475848	1.16819	0.000737289	0.0113104	0.00927316	5333	tags=39%, list=28%, signal=28%	335/10406/5104/27344/1470/4057/221476/4842/7448/12/345/124857/7980/3699/1285/5267/197/2719/866/347365/6423/3697/9104/1474/6691/89932/3698/80760/50859/27151/183/3827/144568/4102/718/6622/4018/11005/259/327657/5858/721/5275/5365/59082/4803/440503/120892/51156/1473/199713/1410/1378/8434/153218/720/5270/3953/6317/728113/5176/653145/5076/3082/11211/7078/51050/338661/284293/2/9734/462/7077/7035/57119/7…
GO:0090533	CC	cation-transporting ATPase complex	18	0.72866	1.55694	0.000746235	0.0114049	0.00935057	4248	tags=72%, list=22%, signal=56%	477/486/5350/482/480/5348/479/10060/6833/53828/496/478/3764
GO:1902101	BP	positive regulation of metaphase/anaphase transition of cell cycle	16	-0.49505	-1.89284	0.000746388	0.0114049	0.00935057	6180	tags=94%, list=33%, signal=63%	996/286053/51434/51529/51433/8452/225689/29945/8697/8881/5925/9700/9587/9787/81620
GO:0035567	BP	non-canonical Wnt signaling pathway	72	0.581773	1.36199	0.000755606	0.011523	0.00944743	4341	tags=44%, list=23%, signal=34%	22943/6422/6425/7476/4653/6424/2719/22881/6423/144165/57216/84870/7484/4920/9863/54361/166336/23500/10082/11211/2487/57664/9620/4919/7074/8326/8325/8324/51339/2535/7481/8322
GO:0061041	BP	regulation of wound healing	125	0.528122	1.2604	0.000773924	0.0117792	0.00965744	4978	tags=47%, list=26%, signal=35%	7448/22915/2266/149461/5624/2147/170692/150/2160/5340/3827/2247/3848/350/25817/5156/54361/2243/6833/90102/4638/6484/2155/5270/948/64094/50506/10979/59/2244/58529/462/7035/2303/3273/5592/5627/135228/58189/710/5345/7852/857/53905/1361/7057/5054/7056/2811/5327/239/5055/3818/2149/947/4846/240/8613/6915
GO:1901618	MF	organic hydroxy compound transmembrane transporter activity	50	0.607583	1.39954	0.000783083	0.0118719	0.00973348	3319	tags=48%, list=18%, signal=40%	5950/89872/6555/201780/9194/359/6579/123264/24/115584/160728/53919/6530/6570/6531/10599/8647/6554/6532/159963/364/6571/360/64137
GO:0035082	BP	axoneme assembly	86	0.556235	1.30914	0.000783083	0.0118719	0.00973348	6513	tags=66%, list=34%, signal=44%	200162/89876/1641/54768/84229/374407/27285/1769/92749/2302/83538/55130/79864/164781/401024/79582/64446/81492/160762/27019/57545/115948/85452/9148/154313/146754/348807/255101/126820/79925/56171/94137/123872/54777/136332/284067/345895/93233/159686/54839/9576/8632/1767/6101/55329/23639/146562/80217/51364/387885/286464/25876/79819/85478/84223/644890/399949
GO:0050953	BP	sensory perception of light stimulus	220	0.499537	1.21415	0.000792241	0.0119639	0.00980893	6102	tags=53%, list=32%, signal=36%	53904/9227/6425/22999/6496/84059/11281/5950/83872/149461/2070/84189/65217/6096/64072/2202/2743/7288/1280/11081/4693/54714/1258/124590/24/1261/25806/5961/145226/5957/155051/343035/51761/57369/5158/6121/3000/1406/1141/6017/5076/23418/388939/8419/7078/2916/768206/57010/5470/7101/8787/94233/158046/388531/338917/783/131890/30813/54437/4308/7287/50939/2700/4060/25769/1421/94137/6247/57282/5145/84694/27…
GO:0046942	BP	carboxylic acid transport	272	0.48337	1.18046	0.000792241	0.0119639	0.00980893	6196	tags=49%, list=33%, signal=33%	2348/55117/56301/477/1811/1066/57030/9058/6860/84889/246213/6538/284111/6542/114571/846/6512/11136/220963/115111/4915/1813/6555/201780/2917/9194/4036/183/6579/123264/6506/6519/6622/4889/1579/8431/9900/6540/9965/160728/10991/3351/115019/6578/5244/5020/53919/5322/6511/56923/553/2352/3952/153201/6567/2670/375611/9122/948/64849/6581/10599/8647/5319/320/6554/189/120103/2911/54716/7200/159963/552/39101…
GO:0072028	BP	nephron morphogenesis	77	0.567621	1.33093	0.0008014	0.0120787	0.00990303	5793	tags=60%, list=31%, signal=42%	80000/2066/2719/9241/10736/7484/6608/183/2247/26585/79191/170690/54361/130497/2138/6943/26249/5076/2668/2737/7471/7482/79192/655/186/7475/8642/5087/30812/3237/9500/5311/6299/7490/7481/6469/3911/2246/51804/5727/5159/4070/650/255743/2625/3975
GO:0016423	MF	tRNA (guanine) methyltransferase activity	13	-0.553473	-1.97076	0.000809475	0.0121458	0.00995808	8473	tags=100%, list=45%, signal=55%	4234/81627/24140/6894/25917/10785/54931/80745/57570/55621/93587/60487
GO:0045039	BP	protein insertion into mitochondrial inner membrane	13	-0.553473	-1.97076	0.000809475	0.0121458	0.00995808	8473	tags=100%, list=45%, signal=55%	55750/26515/140823/26521/51079/29928/9868/90580/26519/26517/26520/1678
GO:0006835	BP	dicarboxylic acid transport	90	0.546855	1.28979	0.000810559	0.0121458	0.00995808	6196	tags=58%, list=33%, signal=39%	2348/477/1811/57030/9058/6860/246213/284111/6512/115111/4915/2917/4036/6506/6519/6622/4889/115019/6511/553/2352/2670/375611/64849/320/189/2911/7200/552/9356/551/2350/4923/113235/2550/83733/11230/135/89874/2697/84230/7442/2912/1244/11255/5172/134/10057/18/8564/157724/116369
GO:0086012	BP	membrane depolarization during cardiac muscle cell action potential	21	0.713334	1.54694	0.000814628	0.0121832	0.00998875	4222	tags=71%, list=22%, signal=56%	6327/477/10021/287/6331/6330/55800/8913/781/783/775/6324/6546/610/859
GO:0008328	CC	ionotropic glutamate receptor complex	40	0.627839	1.42531	0.000828876	0.0123725	0.0101439	4586	tags=62%, list=24%, signal=47%	27092/2903/729993/2891/2901/2899/2898/375567/2893/388336/440829/2890/2900/126129/2892/59284/118427/2895/402117/1742/27091/10368/729956/93145/10369
GO:0086091	BP	regulation of heart rate by cardiac conduction	38	0.637249	1.44439	0.000847194	0.0125973	0.0103283	3713	tags=53%, list=20%, signal=42%	6327/10021/287/6331/6330/55800/8913/781/29119/9992/3741/3757/81033/783/3670/775/23704/857/6324/3752
GO:0048813	BP	dendrite morphogenesis	138	0.526596	1.26021	0.000847194	0.0125973	0.0103283	5647	tags=44%, list=30%, signal=31%	1501/547/22871/5649/10642/51473/7476/5063/158866/577/9201/816/25830/23316/23363/1826/4135/23542/8499/23237/4133/5789/11141/80243/22891/50944/120892/23072/1996/50674/1141/7436/85442/4776/2043/7101/26115/1496/1136/5764/1742/7162/1627/3196/7224/26052/10371/6383/85358/8609/11178/10458/6792/10160/55619/8829/80823/2534/4205/1139/23098
GO:0007187	BP	G protein-coupled receptor signaling pathway, coupled to cyclic nucleotide second messenger	66	0.576078	1.34229	0.000856353	0.0127091	0.0104199	6000	tags=71%, list=32%, signal=49%	1268/4886/23566/1269/155/1129/5745/4852/4161/3358/1133/183/3356/4985/4988/3351/3360/1132/390441/4158/1812/3363/6753/3354/1131/7253/186/3973/3357/3355/2829/4543/3362/5739/6752/3274/1128/6347/3361/3350/284433/1815/11255/219874/10203/390442/26539
GO:0007281	BP	germ cell development	293	0.485306	1.18664	0.000865511	0.0128205	0.0105112	6382	tags=46%, list=34%, signal=31%	56776/63951/3479/1811/7704/84072/84229/4880/6954/163589/283417/56853/658/4948/6691/29118/147872/3815/101928601/22873/8382/346288/1672/26108/58494/126668/257062/56165/26256/401024/54456/135138/54937/79582/374308/26038/346673/646/54361/81492/339834/204474/6847/64753/1761/5139/160762/56163/171483/168391/152015/63946/79727/132612/50846/83700/171484/54852/63978/64100/9148/154313/147700/83853/668/34071…
GO:0001763	BP	morphogenesis of a branching structure	194	0.502	1.21631	0.000902146	0.0133376	0.0109352	6059	tags=48%, list=32%, signal=33%	64478/64399/9723/80000/6422/2255/2045/340419/151449/5314/367/9353/5241/1950/2719/846/9241/6423/10736/84870/7484/1813/6608/2252/183/2247/26585/170690/54361/2099/120892/2138/6943/2736/5076/3082/2668/2737/4776/2294/7471/59277/6474/2303/9620/7482/655/186/7475/8642/8626/5087/57057/30812/6356/3237/10371/54922/9500/8521/3549/3202/5311/6299/859/7490/1909/6469/3911/3239/7075/2246/51804/6909/5727/25932/511…
GO:0030296	MF	protein tyrosine kinase activator activity	20	0.709303	1.5316	0.000909414	0.0134195	0.0110023	3422	tags=55%, list=18%, signal=45%	1950/10718/1946/389658/26585/51378/3084/2915/6886/285016/51738
GO:0060382	BP	regulation of DNA strand elongation	17	-0.482788	-2.05054	0.000917217	0.0135089	0.0110756	9814	tags=100%, list=52%, signal=48%	83444/283899/25913/4798/7528/64710/10445/54617/54891/93973/8607/10856/125476/79913/86/51377
GO:0008179	MF	adenylate cyclase binding	12	0.782715	1.59263	0.000921526	0.0135466	0.0111065	2822	tags=58%, list=15%, signal=50%	111/117/108/9590/154/9472/10486
GO:0048839	BP	inner ear development	191	0.505683	1.2248	0.000929623	0.0136397	0.0111829	6293	tags=50%, list=33%, signal=34%	341640/3249/53904/4916/2255/7545/84059/3777/3776/2070/84189/246213/65217/64072/8516/1750/1280/10804/4920/9096/2561/124590/55283/2558/4760/525/1749/259236/9423/51761/8929/3167/220/168667/222662/51168/5816/375611/26281/1687/2138/2254/9890/5076/2290/2737/55084/2043/3198/7471/2487/6935/340784/7042/4919/8642/6657/8825/79955/54360/117531/2103/140469/9132/6899/161497/2535/6469/7399/5396/2624/7043/51804/…
GO:0033182	BP	regulation of histone ubiquitination	12	-0.553814	-1.86084	0.000939303	0.0137557	0.011278	8466	tags=100%, list=45%, signal=55%	9320/78990/51366/55100/9646/1025/56254/55611/23028/11315/7334
GO:0036376	BP	sodium ion export across plasma membrane	15	0.75773	1.58703	0.000946645	0.0138312	0.0113399	3888	tags=73%, list=21%, signal=58%	477/486/482/480/5348/479/8671/495/496/478/6546
GO:0007178	BP	transmembrane receptor protein serine/threonine kinase signaling pathway	351	0.473633	1.16312	0.000948031	0.0138312	0.0113399	5796	tags=41%, list=31%, signal=29%	3175/91851/64388/22943/23089/7018/168002/2348/3547/651/1149/6422/1311/6425/8483/7044/2255/2662/3623/124857/6424/151449/222223/56963/55273/2719/392255/494470/8516/9241/269/6423/93649/658/174/25928/348093/375567/8646/4856/4920/4036/1749/9573/23090/654/26585/9863/653/4093/2651/1761/7021/7122/168667/25937/84913/4054/222663/8200/9856/65997/2254/4052/3626/4053/10979/1028/23111/7471/10272/10468/402117/6…
GO:0070200	BP	establishment of protein localization to telomere	17	-0.480451	-2.04061	0.000969628	0.0141198	0.0115764	1538	tags=65%, list=8%, signal=60%	7203/10576/7015/6950/908/10575/22948/10694/10574/675/1736
GO:0008277	BP	regulation of G protein-coupled receptor signaling pathway	136	0.517668	1.23841	0.00100325	0.0145547	0.011933	4838	tags=44%, list=26%, signal=33%	1113/2850/7275/116/6900/23349/2147/57528/6000/799/9455/1813/2922/9737/2852/54550/718/22844/2786/6622/154/4988/9628/3351/2788/8786/3000/386617/6003/333/100506013/2915/8787/8601/131890/10267/5999/8490/246176/123041/56246/441925/4987/3357/11251/10266/115727/2779/29767/187/10268/11343/6295/6855/493/815/2696/5148/23236/5997
GO:0048588	BP	developmental cell growth	217	0.498126	1.21002	0.00100325	0.0145547	0.011933	6630	tags=52%, list=35%, signal=34%	9723/223117/3479/22999/2045/221476/63923/23105/23566/8153/9353/6456/6860/7143/84258/9699/1382/9201/3897/57611/1826/148/8128/91584/183/1946/6857/4099/4137/1630/4133/6586/9423/2258/4692/9362/4803/10439/66000/9856/8470/57556/56920/9472/344901/51760/59284/10500/23111/54413/6585/5802/54437/668/4131/6387/5999/7852/1627/23025/8482/7224/80128/5071/1908/10371/27185/859/1909/9576/23769/57699/80031/343472/5…
GO:0006940	BP	regulation of smooth muscle contraction	61	0.583952	1.35777	0.00102166	0.0147389	0.0120841	5977	tags=66%, list=32%, signal=45%	477/6869/1129/93649/80763/3815/1264/148/9312/150/2852/3778/5023/154/5020/56923/1143/152/796/2982/1136/6870/1131/5592/5021/51738/6865/857/7137/151/2149/5997/6915/5743/255743/1906/10203/134/143872/18
GO:0034704	CC	calcium channel complex	68	0.573833	1.33885	0.00102166	0.0147389	0.0120841	4756	tags=53%, list=25%, signal=40%	774/27092/845/59285/6261/785/8911/8913/257062/781/779/286097/168507/55799/9254/773/9472/59284/6263/786/777/8912/783/117144/2281/7223/775/6262/7224/378807/10368/55503/257044/3306/10369/57828
GO:0071695	BP	anatomical structure maturation	244	0.490914	1.19577	0.00102166	0.0147389	0.0120841	6196	tags=49%, list=33%, signal=33%	8854/4057/4653/3479/1811/7704/6496/6366/6363/6900/2266/5241/4880/6954/163589/577/440712/6261/5745/1258/51412/1672/84530/54738/126668/257062/718/56165/26256/429/5979/26585/11005/8941/25893/646/89/120892/5139/2046/8434/152015/3952/1910/645811/5076/29842/10882/8419/342035/1028/64100/57731/2692/7471/59277/163175/6886/1524/83853/4313/30813/1901/7042/2688/8642/6690/123041/26468/51083/8399/1235/30812/74…
GO:0061684	BP	chaperone-mediated autophagy	16	0.742582	1.56648	0.00103615	0.0149202	0.0122327	2240	tags=31%, list=12%, signal=28%	1917/1191/171024/6622/2670
GO:0051209	BP	release of sequestered calcium ion into cytosol	118	0.532506	1.26935	0.00104007	0.0149211	0.0122335	5172	tags=47%, list=27%, signal=34%	477/4842/6366/845/6363/287/2147/5350/6261/10345/57338/3358/844/57158/1813/84502/7220/2852/55283/2247/3356/6622/5587/1756/2814/930/9472/1236/6263/1812/2946/9001/2281/2815/3708/9002/126306/775/3270/6262/4923/3357/1193/6546/2829/2811/5311/187/6375/387129/2149/201140/5336/825/7442
GO:0046879	BP	hormone secretion	277	0.484658	1.18413	0.00104007	0.0149211	0.0122335	5977	tags=43%, list=32%, signal=30%	1268/9370/27445/111/640/6422/3745/1113/2850/169026/185/6869/9971/3623/222546/5950/116/2266/7432/9699/846/2695/1363/886/6616/143425/3358/54097/1813/4856/2587/2922/25924/150/2645/2852/183/387597/1946/4986/4760/114131/1394/654/8431/9607/9024/2243/6833/7021/6343/1393/3952/6567/114899/2822/140606/3741/388581/2244/2641/2692/5443/6447/668/7200/2281/2044/8425/63036/3670/57555/8938/6690/5798/8447/5028/517…
GO:2000311	BP	regulation of AMPA receptor activity	25	0.680624	1.50022	0.00104424	0.0149315	0.0122419	6054	tags=96%, list=32%, signal=65%	22871/5649/27092/729993/388336/23542/440829/23237/154/50944/146395/59284/54413/4208/57555/27091/10368/729956/85358/10369/254263/149111/80863/59283
GO:0019774	CC	proteasome core complex, beta-subunit complex	11	-0.617043	-1.89738	0.00104464	0.0149315	0.0122419	1305	tags=73%, list=7%, signal=68%	5694/5690/5693/5689/5695/5699/5698/5696
GO:0043121	MF	neurotrophin binding	10	0.799913	1.58894	0.00104829	0.0149559	0.012262	2760	tags=70%, list=15%, signal=60%	4804/4916/23105/4915/4914/9001/2
GO:0032835	BP	glomerulus development	65	0.583075	1.3573	0.00105848	0.0150184	0.0123132	5793	tags=66%, list=31%, signal=46%	9370/1286/1285/28999/84623/9241/2302/5979/4868/9863/80310/5156/130497/25937/1910/6943/284/5076/59/2303/7010/9788/655/186/4208/26508/7827/8710/8842/7490/1909/5175/4811/3570/1958/4854/947/4853/5159/10409/3913/55959/3975
GO:0021537	BP	telencephalon development	244	0.490737	1.19534	0.00105848	0.0150184	0.0123132	5567	tags=39%, list=29%, signal=28%	5649/10642/477/93986/2066/6496/6900/6331/9353/7143/4747/84623/4009/10718/3736/482/554/5079/4852/6092/4915/1813/6608/1000/91584/5455/146760/285025/6506/4760/1749/79633/429/2018/238/8941/5915/2258/1600/220/120892/6343/64805/66000/89927/2290/9638/1812/2737/3084/7101/63950/266727/6387/552/2044/5021/7852/3400/8320/166614/26468/64211/8482/6716/6091/5992/10371/6546/85458/10716/27185/664/6299/170825/6469…
GO:0015849	BP	organic acid transport	312	0.480541	1.17753	0.00105848	0.0150184	0.0123132	5654	tags=43%, list=30%, signal=30%	2348/28965/55117/56301/477/1381/1811/6545/57709/2167/57030/55089/9058/6860/84889/246213/6538/284111/6542/114571/1382/6512/11136/5375/115111/4948/4915/1813/6555/80763/201780/2917/9194/4036/183/6579/123264/6506/340024/6519/6622/4889/1579/8431/9900/6540/222962/9965/160728/10991/3351/115019/116362/5020/53919/5322/6511/56923/553/2352/3952/153201/6567/2670/375611/948/2170/64849/10599/8647/5319/83758/32…
GO:0001755	BP	neural crest cell migration	59	0.588543	1.36637	0.00107689	0.0151684	0.0124362	5895	tags=64%, list=31%, signal=45%	2348/9723/223117/2066/55698/9464/5308/6608/5979/9965/8929/1910/57556/56920/8092/2668/10500/54437/3670/655/8482/1908/30812/3357/10371/6899/1909/6469/3911/80031/8828/10501/8829/54910/1906/64218/10512/2335
GO:0001523	BP	retinoid metabolic process	82	0.562125	1.31998	0.00107689	0.0151684	0.0124362	6005	tags=60%, list=32%, signal=41%	125/9227/8854/7276/1381/5950/126/1545/1382/127/124/339761/4036/24/54905/195814/1543/145226/220/6121/54658/6017/54577/1558/441282/57016/1544/340665/1645/131/5406/5947/216/1562/1592/4035/231/5919/59342/50700/5948/83875/54576/10170/3991/1551/1576/158835/9249
GO:1901379	BP	regulation of potassium ion transmembrane transport	85	0.555884	1.3072	0.00107689	0.0151684	0.0124362	4749	tags=48%, list=25%, signal=36%	57628/3787/486/3755/845/287/88/1804/30820/3736/482/3788/6000/2273/4986/219527/3746/9992/30818/6833/65267/9472/3779/3757/126755/5999/57463/23704/51083/857/3747/2316/1908/144245/7881/859/81832/3792/23630/30819/4878
GO:0001823	BP	mesonephros development	99	0.538084	1.2739	0.00107689	0.0151684	0.0124362	5831	tags=56%, list=31%, signal=39%	80000/6422/2255/7704/9353/2719/9241/10736/2302/6092/7484/6608/183/2247/5979/26585/9244/5915/170690/54361/130497/168667/2138/6943/5076/2668/2737/7471/2303/7482/655/186/7475/8642/5087/30812/3237/6492/9500/5311/6299/7490/7481/6469/3911/2246/51804/5727/4070/650/10409/255743/2625/3975/2263
GO:0001540	MF	amyloid-beta binding	81	0.555003	1.30261	0.00109529	0.0153316	0.01257	4613	tags=44%, list=24%, signal=34%	335/22871/4804/774/2903/590/84570/1191/2891/26232/799/2893/322/23542/2890/154/43/1410/773/948/2892/58512/2043/320/9452/7042/2213/478/4035/10268/8322/3339/10333/23621/321/3375
GO:0005262	MF	calcium channel activity	117	0.535805	1.2769	0.00109529	0.0153316	0.01257	5695	tags=58%, list=30%, signal=41%	1268/774/27112/27092/2903/114780/59285/2823/6261/785/8911/8913/79054/7220/55283/781/80036/57419/779/4988/140803/3351/168507/55799/9254/773/162514/59284/6263/786/777/8912/783/4308/140738/117144/342372/2281/728215/3708/7223/775/123041/25769/6262/7224/7222/117531/378807/57113/27091/10368/5311/80228/55503/27039/59341/117532/10369/283652/255022/7442/22821/55584/1139/8989/778/7225
GO:0060294	BP	cilium movement involved in cell motility	136	0.516224	1.23495	0.00109529	0.0153316	0.01257	6513	tags=60%, list=34%, signal=39%	338/6869/84229/54514/9104/27285/8911/480/22873/1672/144535/257062/401024/79582/81492/387712/203074/79645/152015/27019/63978/51314/8701/9148/154313/5360/147700/83853/57119/6870/117144/164714/85413/255101/246176/126820/221481/64518/144406/11189/79925/6865/255061/1235/54777/284067/378807/345895/285335/159686/5414/146279/9389/257044/164395/9576/493/133308/1767/199223/55329/202500/3948/285588/23639/15…
GO:0005251	MF	delayed rectifier potassium channel activity	32	0.657298	1.47538	0.00109639	0.0153316	0.01257	4856	tags=78%, list=26%, signal=58%	3745/170850/3787/3755/3736/56479/3739/9312/3746/9992/3737/3756/3741/3757/3738/93107/3748/23704/3790/3747/3743/9132/23630/3785/3786
GO:0016010	CC	dystrophin-associated glycoprotein complex	17	0.734261	1.55595	0.00111196	0.0155053	0.0127124	4380	tags=76%, list=23%, signal=59%	54221/6442/6445/5239/8910/1756/6444/8082/54212/6640/137868/859/7402
GO:0006720	BP	isoprenoid metabolic process	115	0.531541	1.26628	0.0011137	0.0155053	0.0127124	4825	tags=41%, list=25%, signal=31%	125/9227/8854/7276/1381/3158/5950/126/1545/1559/1382/127/124/339761/4036/24/1557/54905/195814/1543/145226/220/6121/54658/6017/54577/1558/441282/57016/1544/340665/1645/131/5406/5947/216/1562/1592/1571/4035/231/5919/729920/59342/50700/5948/83875
GO:1903514	BP	release of sequestered calcium ion into cytosol by endoplasmic reticulum	33	0.64304	1.4446	0.00111481	0.0155053	0.0127124	3888	tags=48%, list=21%, signal=39%	477/845/287/5350/6261/10345/844/1756/9472/2946/2281/775/3270/6262/1193/6546
GO:0007171	BP	activation of transmembrane receptor protein tyrosine kinase activity	14	0.763371	1.58716	0.00111762	0.0155165	0.0127216	3741	tags=79%, list=20%, signal=63%	1950/10718/1946/154/26585/51378/284/3084/6886/1136/56034
GO:0005581	CC	collagen trimer	86	0.551328	1.29759	0.00113211	0.0156895	0.0128635	5382	tags=57%, list=28%, signal=41%	9370/1310/6441/1286/114905/1285/84570/1287/51435/1288/1280/1297/81035/78989/7373/114898/1296/81578/1295/129080/136227/338761/338872/114899/165257/10882/342035/1302/8292/256076/729238/4060/11117/57642/1896/1299/91522/2219/1307/4153/1300/255631/131873/169044/147372/131149/1292/1293/1281
GO:0022600	BP	digestive system process	104	0.539487	1.28073	0.00115052	0.0159162	0.0130493	3969	tags=38%, list=21%, signal=30%	7032/335/337/887/340547/4588/6869/2255/4883/12/5950/362/8435/7031/389015/5733/1582/115111/64241/150/1133/29881/4986/4760/5020/6343/3952/948/339221/1131/5021/6690/1645/51738/5406/4987/2168/113235/64240
GO:0016101	BP	diterpenoid metabolic process	85	0.555284	1.30579	0.00116892	0.0160437	0.0131539	6005	tags=58%, list=32%, signal=40%	125/9227/8854/7276/1381/5950/126/1545/1382/127/124/339761/4036/24/54905/195814/1543/145226/220/6121/54658/6017/54577/1558/441282/57016/1544/340665/1645/131/5406/5947/216/1562/1592/4035/231/5919/59342/50700/5948/83875/54576/10170/3991/1551/1576/158835/9249
GO:0007338	BP	single fertilization	151	0.512895	1.23216	0.00116892	0.0160437	0.0131539	5695	tags=46%, list=30%, signal=32%	2348/5104/22999/1047/27443/367/79400/23627/2743/27120/54742/7455/158062/126206/49/64753/203074/246777/153218/2352/152015/148281/4033/147650/81623/64100/8912/3236/339168/668/22917/11055/85413/6690/26998/2350/8399/26206/283471/390243/494551/2741/8747/7222/57113/256710/203102/100131137/148229/5327/10361/2515/284359/144321/89766/4240/23236/8749/3235/8748/57151/7783/136242/167/55231/146378/132141/7142…
GO:0060560	BP	developmental growth involved in morphogenesis	231	0.491195	1.19511	0.00116892	0.0160437	0.0131539	6600	tags=51%, list=35%, signal=34%	9723/223117/6422/2255/22999/2045/63923/23105/23566/8153/9353/6456/6860/7143/84258/9699/1382/6423/9201/3897/57611/1826/8128/91584/1946/6857/4099/4137/1630/4133/9863/6586/9423/2258/4692/9362/2099/4803/7477/10439/66000/9856/57556/56920/344901/51760/59284/10500/23111/54413/6585/5802/54437/1901/4131/6387/7852/1627/23025/8482/7224/80128/5071/1908/6356/10371/27185/6299/1909/7481/6469/9576/3239/23769/224…
GO:0009914	BP	hormone transport	286	0.485194	1.18577	0.00116892	0.0160437	0.0131539	5977	tags=44%, list=32%, signal=30%	1268/9370/27445/111/640/6422/3745/1113/2850/169026/7276/185/6869/9971/3623/222546/5950/116/2266/7432/114571/9699/846/2695/1363/886/6616/143425/3358/54097/1813/4856/2587/2922/25924/150/2645/2852/183/387597/1946/4986/4760/114131/1394/654/8431/9607/9024/2243/6833/7021/53919/6343/1393/3952/6567/114899/2822/140606/10599/3741/388581/2244/1428/2641/2692/5443/6447/668/7200/2281/2044/8425/63036/3670/57555…
GO:0097106	BP	postsynaptic density organization	31	0.65835	1.47508	0.00117009	0.0160437	0.0131539	4395	tags=61%, list=23%, signal=47%	22871/5649/4884/4916/22865/9378/9379/1000/5789/94030/66000/2895/8506/869/57555/1742/26045/64101/85358
GO:0004222	MF	metalloendopeptidase activity	108	0.536685	1.27472	0.00118733	0.0162514	0.0133241	5404	tags=48%, list=29%, signal=35%	80332/1179/60676/171019/8745/11095/7092/4316/80070/170692/89932/170690/388630/8510/11086/9427/81794/10893/118856/9510/9635/4313/164656/9508/170691/4326/170689/4185/7093/4325/5251/10863/8747/53616/79148/9313/11085/203102/2515/56999/11174/3792/4327/5645/64066/8749/8756/8748/56547/101/4225/79258
GO:0005852	CC	eukaryotic translation initiation factor 3 complex	15	-0.507233	-1.92618	0.00121375	0.0165544	0.0135726	9350	tags=53%, list=49%, signal=27%	8666/27335/10987/8668/8664/8667/10480/3646
GO:0033290	CC	eukaryotic 48S preinitiation complex	15	-0.507233	-1.92618	0.00121375	0.0165544	0.0135726	9350	tags=53%, list=49%, signal=27%	8666/27335/8668/8664/8667/10480/1965/3646
GO:0006167	BP	AMP biosynthetic process	14	-0.542298	-2.00557	0.00121795	0.0165795	0.0135931	1399	tags=50%, list=7%, signal=46%	100/471/5471/318/3251/10606/5634
GO:0004714	MF	transmembrane receptor protein tyrosine kinase activity	60	0.57526	1.33546	0.00122415	0.0165795	0.0135931	5304	tags=58%, list=28%, signal=42%	4593/4916/2066/2045/285220/2202/4915/3815/4920/2322/6098/5157/1949/5979/238/5156/2042/4914/2046/2260/2051/4921/2043/7010/2044/3645/2261/4058/558/7075/8828/5159/10461/8829/2324
GO:0060291	BP	long-term synaptic potentiation	84	0.556849	1.30917	0.00122415	0.0165795	0.0135931	4395	tags=45%, list=23%, signal=35%	152404/5649/10590/347730/2903/7143/6547/1395/2695/6543/6616/4915/1813/11170/23237/6622/10858/2670/4355/5270/51201/1812/107/4776/2043/91683/7101/1524/5582/5764/25769/57616/794/114/26045/27065/729956/85358
GO:1903034	BP	regulation of response to wounding	155	0.513019	1.23347	0.00122415	0.0165795	0.0135931	4978	tags=44%, list=26%, signal=33%	7448/22915/2266/56963/149461/7143/5624/2147/170692/150/146760/2160/5340/3827/2247/3848/350/25817/5156/54361/2243/6833/90102/4638/6484/2155/9856/5270/948/64094/50506/10979/59/2244/58529/2043/462/7035/5802/2303/2281/3273/5592/5764/5627/135228/58189/710/5345/7852/857/53905/2316/1361/7057/5054/7056/2811/5327/239/5055/3818/2149/947/4846/240/8613/6915
GO:0061952	BP	midbody abscission	17	-0.472545	-2.00703	0.00123168	0.0166524	0.0136529	10008	tags=100%, list=53%, signal=47%	57132/27243/51652/91782/128866/29082/25978/5119/10015/27183/129531/9525/51510/10112/92421/55165
GO:0050819	BP	negative regulation of coagulation	51	0.603886	1.39283	0.00124256	0.016683	0.013678	4753	tags=63%, list=25%, signal=47%	7448/222537/2266/5624/2147/170692/2160/5340/3827/3848/350/5156/2243/5270/2244/7035/3273/5592/5627/710/5345/1361/7057/5054/7056/2811/5327/239/5055/3818/947/4846
GO:0055078	BP	sodium ion homeostasis	56	0.595811	1.37928	0.00124256	0.016683	0.013678	3888	tags=54%, list=21%, signal=43%	6332/477/185/6869/482/554/480/6338/1813/6340/80763/183/525/479/6559/1579/7380/7021/5020/6557/4881/1910/10699/4879/495/552/551/496/478/6546
GO:0048762	BP	mesenchymal cell differentiation	233	0.49114	1.19521	0.00124256	0.016683	0.013678	5895	tags=47%, list=31%, signal=33%	2348/3249/9723/223117/6422/8854/2066/2255/55273/55698/9241/6423/10736/140628/9464/6910/5308/145258/6608/1000/147906/5979/26585/653/2042/4139/9965/54361/130497/2651/2295/8929/90102/202151/25937/80199/2260/10439/1910/6943/6317/57556/56920/5076/8092/3082/2668/10979/10500/2043/3084/2487/54437/2303/51384/7042/7041/340665/3670/655/753/4208/26508/114990/7074/54756/80326/8320/8482/57057/2316/1908/7478/30…
GO:0090596	BP	sensory organ morphogenesis	265	0.485874	1.18553	0.00124256	0.016683	0.013678	6718	tags=52%, list=35%, signal=34%	2792/3249/53904/2255/7545/6496/5950/362/84189/8076/6096/64072/2202/1735/8516/9241/54549/1750/91156/121643/10736/1280/23363/1826/7483/4915/10804/5308/4920/145258/9096/124590/25806/2247/525/1749/259236/7068/9423/5915/51761/1296/130497/2295/1295/7021/3167/220/6121/3229/222662/3199/51168/2138/2254/5076/23418/2290/118427/2737/348980/55084/55714/3198/4237/57010/7471/2487/5309/6935/30813/340784/668/7287…
GO:0043198	CC	dendritic shaft	36	0.630922	1.42474	0.00126096	0.0169008	0.0138566	3962	tags=56%, list=21%, signal=44%	84623/401190/84502/2917/2852/3356/4133/5577/124925/79953/4355/4130/2043/2915/55243/57555/4923/91752/6546/2550
GO:0007617	BP	mating behavior	38	0.627998	1.42343	0.00127937	0.017118	0.0140346	3437	tags=50%, list=18%, signal=41%	1268/63951/6869/6863/7432/23542/5023/7068/5020/4808/1910/5270/1816/1812/6532/552/5021/5028/551
GO:0005675	CC	transcription factor TFIIH holo complex	12	-0.538295	-1.8087	0.00129044	0.0172362	0.0141316	8760	tags=100%, list=46%, signal=54%	64210/2068/2968/2071/728340/2965/404672/4331/902/2967/1022
GO:0046717	BP	acid secretion	45	0.613898	1.40333	0.00129778	0.0173045	0.0141875	3962	tags=60%, list=21%, signal=48%	7032/887/1066/389015/5733/846/115111/1813/1133/123264/9900/3351/5244/5020/6343/8647/320/6554/189/7200/85413/5021/7223/51738/4923/4987/2550
GO:0035235	BP	ionotropic glutamate receptor signaling pathway	22	0.695527	1.51149	0.00130429	0.0173317	0.0142098	2477	tags=50%, list=13%, signal=44%	5354/2894/2891/2901/2899/2898/2893/2890/2900/2892/2895
GO:1990806	BP	ligand-gated ion channel signaling pathway	22	0.695527	1.51149	0.00130429	0.0173317	0.0142098	2477	tags=50%, list=13%, signal=44%	5354/2894/2891/2901/2899/2898/2893/2890/2900/2892/2895
GO:1900152	BP	negative regulation of nuclear-transcribed mRNA catabolic process, deadenylation-dependent decay	12	0.775746	1.57845	0.00132026	0.0174999	0.0143477	88	tags=8%, list=0%, signal=8%	10642
GO:0032281	CC	AMPA glutamate receptor complex	26	0.671716	1.4856	0.00132147	0.0174999	0.0143477	5428	tags=81%, list=29%, signal=58%	27092/729993/2891/375567/2893/388336/440829/2890/126129/2892/59284/118427/402117/1742/27091/10368/729956/93145/10369/254263/149111
GO:0072171	BP	mesonephric tubule morphogenesis	64	0.572369	1.33193	0.0013346	0.0175537	0.0143918	5793	tags=62%, list=31%, signal=44%	80000/2719/9241/10736/7484/6608/183/2247/26585/170690/54361/130497/2138/6943/5076/2668/2737/7471/7482/186/7475/8642/5087/30812/3237/9500/5311/6299/7490/7481/6469/3911/2246/51804/5727/4070/650/255743/2625/3975
GO:0034308	BP	primary alcohol metabolic process	105	0.539085	1.27982	0.0013346	0.0175537	0.0143918	6036	tags=50%, list=32%, signal=35%	125/9227/8854/7276/1583/3479/8277/5950/126/1545/27233/127/1646/124/6338/339761/195814/654/1543/653/145226/54361/220/6121/1910/1558/8912/441282/57016/1544/1645/131/5406/6799/2819/216/1562/231/50700/79153/222/10170/3991/650/1601/27122/1551/1576/1585/158835/1584/9249/221
GO:0051282	BP	regulation of sequestering of calcium ion	121	0.526658	1.25618	0.0013346	0.0175537	0.0143918	5172	tags=45%, list=27%, signal=33%	477/4842/6366/845/6363/287/2147/5350/6261/10345/57338/3358/844/57158/1813/84502/7220/2852/55283/2247/3356/6622/5587/1756/2814/930/9472/1236/6263/1812/2946/9001/2281/2815/3708/9002/126306/775/3270/6262/4923/3357/1193/6546/2829/2811/5311/187/6375/387129/2149/201140/5336/825/7442
GO:0050769	BP	positive regulation of neurogenesis	214	0.4924	1.19553	0.0013346	0.0175537	0.0143918	5742	tags=43%, list=30%, signal=30%	5649/23566/5063/8153/9353/4747/5803/1382/3897/5324/816/57611/23316/6092/140578/443/23363/1826/4135/4915/1813/3815/6608/4036/91584/2852/1946/4099/4137/26011/429/5789/4988/11141/9423/22891/5365/4803/114798/1638/7732/2670/5270/5176/2290/2737/9001/146433/2043/2915/9148/6604/57165/6474/1524/63950/4131/6387/154288/5764/57463/7074/7852/1627/8482/7224/6091/30812/1959/85458/27185/170825/6469/7424/85358/23…
GO:0016339	BP	calcium-dependent cell-cell adhesion via plasma membrane cell adhesion molecules	43	0.611943	1.39556	0.001353	0.0176934	0.0145064	3661	tags=53%, list=19%, signal=43%	28513/22871/26167/6403/56130/64072/56132/1008/1000/64405/56133/56131/1007/1016/5098/56125/1010/6402/1004/8641/8642/28316/1009
GO:0051279	BP	regulation of release of sequestered calcium ion into cytosol	77	0.560594	1.31445	0.001353	0.0176934	0.0145064	4779	tags=47%, list=25%, signal=35%	477/4842/845/287/2147/5350/10345/57338/844/57158/84502/7220/2852/6622/5587/1756/930/9472/1812/2946/9001/2281/9002/126306/775/3270/6262/4923/1193/6546/5311/187/6375/387129/2149/201140
GO:0030902	BP	hindbrain development	148	0.515279	1.23742	0.001353	0.0176934	0.0145064	5072	tags=44%, list=27%, signal=32%	8854/1272/7476/2662/6331/1950/4009/9241/482/57502/2735/3211/23026/6608/401/4760/2247/3746/1152/429/653/8941/124925/2019/1600/8929/22891/3199/50674/4808/3212/5270/2736/2895/85442/2020/9001/6753/7471/6532/1496/340719/869/655/388610/64211/2213/5457/1959/85458/10716/6095/57626/10395/170825/6469/8322/3213/6752/2624/23017/79971/25861/4761/51176
GO:0005343	MF	organic acid:sodium symporter activity	30	0.639868	1.43266	0.00135436	0.0176934	0.0145064	4166	tags=60%, list=22%, signal=47%	55117/9058/6538/284111/6512/6555/201780/6506/6540/160728/6511/64849/6554/54716/159963/9963/6539/9152
GO:0051208	BP	sequestering of calcium ion	125	0.523526	1.24943	0.00137141	0.017826	0.0146151	5172	tags=44%, list=27%, signal=32%	477/4842/6366/845/6363/287/2147/5350/6261/10345/57338/3358/844/57158/1813/84502/7220/2852/55283/2247/3356/6622/5587/1756/2814/930/9472/1236/6263/1812/2946/9001/2281/2815/3708/9002/126306/775/3270/6262/4923/3357/1193/6546/2829/2811/5311/187/6375/387129/2149/201140/5336/825/7442
GO:1903305	BP	regulation of regulated secretory pathway	138	0.52124	1.24739	0.00137141	0.017826	0.0146151	4949	tags=42%, list=26%, signal=31%	1268/140730/22871/640/3745/7476/6860/84258/341359/6861/8911/8913/143425/1813/148/150/6857/5023/3356/5217/8941/3351/120892/8448/57126/6853/51760/148281/8973/1812/107/2623/8912/91683/2294/201294/320/83849/783/5579/5413/23208/5582/8938/8447/5028/1142/2213/2242/729230/55503/192683/23621/6855/2624/3565/135/3598
GO:0043583	BP	ear development	217	0.495325	1.20321	0.00137141	0.017826	0.0146151	6293	tags=48%, list=33%, signal=33%	341640/3249/53904/4916/2255/7545/84059/3777/3776/2070/84189/246213/65217/64072/8516/9241/1750/10736/1280/10804/4920/145258/9096/2561/124590/55283/2558/4760/525/1749/259236/653/9423/51761/130497/8929/3167/220/168667/222662/3199/51168/5816/375611/26281/1687/2138/2254/9890/5076/2290/2737/6939/55084/2043/3198/7471/2487/6935/340784/7042/4919/8642/6657/8825/79955/54360/117531/2103/140469/9132/6899/1614…
GO:0097091	BP	synaptic vesicle clustering	14	0.759409	1.57893	0.00138059	0.0179153	0.0146883	3305	tags=71%, list=17%, signal=59%	27445/22871/6854/8224/1000/9024/79953/6853/84446/57555
GO:0019229	BP	regulation of vasoconstriction	63	0.57621	1.33989	0.00142664	0.018451	0.0151275	5958	tags=68%, list=31%, signal=47%	477/185/6869/2266/846/554/148/150/183/5023/3356/342527/2243/146/553/10242/3952/3741/2244/152/147/4313/10800/552/1131/5021/551/6640/857/1908/151/59272/27345/2149/3274/6915/5743/1621/3350/2702/1906/952/143872
GO:0051260	BP	protein homooligomerization	186	0.501061	1.21251	0.00142664	0.018451	0.0151275	4148	tags=32%, list=22%, signal=25%	23089/55600/286133/3745/1311/8854/170850/3787/3755/362/89872/57528/23627/3736/6261/3788/361/79689/3739/9312/8001/359/6506/3746/23237/27012/5961/3768/3737/6847/84433/220/3751/3754/386617/7732/3750/4355/51733/6263/3741/348980/146212/3738/30845/735/32/493829/93107/6247/3748/3790/3747/3752/51466/3743/114/22861/5311
GO:0007158	BP	neuron cell-cell adhesion	17	0.728277	1.54327	0.00144834	0.0187005	0.0153321	1564	tags=59%, list=8%, signal=54%	460/22871/9378/7143/9379/57502/152330/9369/4685/5979
GO:0017158	BP	regulation of calcium ion-dependent exocytosis	40	0.621315	1.4105	0.00146345	0.0187705	0.0153894	3408	tags=50%, list=18%, signal=41%	3745/6860/84258/341359/6861/8911/8913/143425/150/6857/8941/8448/51760/148281/8912/91683/83849/23208/8938/8447
GO:0021885	BP	forebrain cell migration	61	0.577921	1.34374	0.00146345	0.0187705	0.0153894	4035	tags=46%, list=21%, signal=36%	5649/6900/9353/7143/10718/1813/5455/285025/2018/8941/2258/1600/120892/64805/89927/2290/1812/2737/3084/7101/266727/6387/7852/26468/6091/85458/558/27185
GO:0051592	BP	response to calcium ion	143	0.515052	1.23494	0.00146345	0.0187705	0.0153894	5472	tags=48%, list=29%, signal=35%	5563/22871/5179/84059/845/6331/2266/6860/84258/846/6261/341359/6861/143425/7220/6857/3778/5122/9362/2243/10235/2354/3756/1393/121278/10242/144402/51760/2822/148281/6263/4547/27094/107/2244/3779/91683/83849/23208/360/4208/125981/6262/857/7273/7057/7139/10156/7222/246/114/5311/3625/131034/55503/10369/27345/2696/10628/30819/57699/5336/25932/4761/825/100271927/151835/9066/4205
GO:0021953	BP	central nervous system neuron differentiation	167	0.507373	1.22452	0.00146345	0.0187705	0.0153894	5495	tags=48%, list=29%, signal=34%	3226/7476/79625/151449/6900/84871/161357/9353/4009/9201/121643/4852/4915/1813/6608/91584/401/4137/1630/79659/4133/429/26038/8929/431707/1996/4808/3952/2051/1141/2736/2290/2895/1812/85442/2737/2043/57731/7101/7471/3236/58524/6886/266727/869/120237/3670/9760/2636/3400/8320/166614/26468/57282/64211/6324/57057/1009/6695/143941/10371/5457/10716/6095/27185/64843/170825/6469/85358/2624/23017/5727/4858/7…
GO:1901019	BP	regulation of calcium ion transmembrane transporter activity	85	0.551006	1.29573	0.00150027	0.0191792	0.0157245	4900	tags=48%, list=26%, signal=36%	477/4842/845/287/5350/9104/10345/785/57338/844/57158/1813/84502/150/781/1394/1756/9992/6236/342667/9472/2946/9001/6769/783/30845/2281/126306/2669/3270/6262/4987/1193/10681/5311/859/100507027/28954/3306/4878/5336
GO:0046883	BP	regulation of hormone secretion	227	0.491295	1.19485	0.00150027	0.0191792	0.0157245	5749	tags=43%, list=30%, signal=30%	1268/9370/111/640/6422/3745/1113/2850/169026/185/6869/9971/3623/222546/5950/116/2266/846/2695/886/6616/143425/3358/1813/4856/2587/2922/25924/150/2645/2852/183/1946/4986/4760/114131/1394/654/8431/9607/9024/2243/6833/7021/6343/1393/3952/114899/2822/3741/388581/2244/2641/2692/5443/6447/668/7200/2281/2044/63036/3670/57555/8938/6690/8447/5028/51738/51083/6865/5071/1908/2864/1588/2550/114/3625/8609/133…
GO:0007214	BP	gamma-aminobutyric acid signaling pathway	27	0.668239	1.48431	0.00150327	0.0191859	0.0157301	5409	tags=85%, list=29%, signal=61%	2567/2569/2566/23349/2556/2561/2558/165829/9568/2554/2562/2564/2565/5334/2550/23228/200959/729956/2559/2570/2555/3350/2560
GO:0062237	BP	protein localization to postsynapse	36	0.625494	1.41248	0.00151868	0.0192556	0.0157872	4586	tags=44%, list=24%, signal=34%	4884/9211/2903/158866/6616/5913/23426/10082/59284/51201/160622/1742/80852/27065/10368/10369
GO:0030326	BP	embryonic limb morphogenesis	119	0.532669	1.26999	0.00151868	0.0192556	0.0157872	5160	tags=44%, list=27%, signal=32%	22943/341640/8854/3226/7476/3899/7704/340419/2719/1382/9241/1750/6423/80144/9464/6910/4920/79659/1749/57167/26585/2019/5915/130497/9496/8434/8200/2254/60529/2737/3236/6474/2201/7042/3227/655/8626/775/257/5087/3549/6299/6469/5396/3239/6909/4853/3235/5727/2697/51176/3238
GO:0035113	BP	embryonic appendage morphogenesis	119	0.532669	1.26999	0.00151868	0.0192556	0.0157872	5160	tags=44%, list=27%, signal=32%	22943/341640/8854/3226/7476/3899/7704/340419/2719/1382/9241/1750/6423/80144/9464/6910/4920/79659/1749/57167/26585/2019/5915/130497/9496/8434/8200/2254/60529/2737/3236/6474/2201/7042/3227/655/8626/775/257/5087/3549/6299/6469/5396/3239/6909/4853/3235/5727/2697/51176/3238
GO:0007601	BP	visual perception	216	0.494751	1.20169	0.00151868	0.0192556	0.0157872	6102	tags=52%, list=32%, signal=36%	53904/9227/6425/22999/6496/84059/11281/5950/83872/149461/2070/84189/6096/64072/2202/2743/7288/1280/11081/4693/54714/1258/24/1261/25806/5961/145226/5957/155051/343035/51761/57369/5158/6121/3000/1406/1141/6017/5076/23418/388939/8419/7078/2916/768206/57010/5470/7101/8787/94233/158046/388531/338917/783/131890/30813/54437/4308/7287/50939/2700/4060/25769/1421/94137/6247/57282/5145/84694/2741/3859/44043…
GO:0004970	MF	ionotropic glutamate receptor activity	19	0.708164	1.52453	0.00153091	0.019379	0.0158884	2477	tags=58%, list=13%, signal=50%	2903/2894/2891/2901/2899/2898/2893/2890/2900/2892/2895
GO:0001736	BP	establishment of planar polarity	72	0.570984	1.33673	0.00153708	0.0193938	0.0159005	4301	tags=43%, list=23%, signal=33%	22943/6422/7476/2066/5314/2719/22881/6423/144165/57216/84870/7484/4920/79864/9863/9024/2295/166336/80199/10082/84446/57664/9620/4919/4867/7074/8626/8324/51339/2535/7481
GO:0007164	BP	establishment of tissue polarity	72	0.570984	1.33673	0.00153708	0.0193938	0.0159005	4301	tags=43%, list=23%, signal=33%	22943/6422/7476/2066/5314/2719/22881/6423/144165/57216/84870/7484/4920/79864/9863/9024/2295/166336/80199/10082/84446/57664/9620/4919/4867/7074/8626/8324/51339/2535/7481
GO:0005501	MF	retinoid binding	37	0.634125	1.43504	0.00155549	0.0195623	0.0160387	5184	tags=68%, list=27%, signal=49%	5104/9227/8854/1381/5950/1382/127/5730/339761/24/54905/116362/54658/6017/54577/83758/94233/340665/131/5947/1592/7026/5948/6010/54576
GO:0019840	MF	isoprenoid binding	37	0.634125	1.43504	0.00155549	0.0195623	0.0160387	5184	tags=68%, list=27%, signal=49%	5104/9227/8854/1381/5950/1382/127/5730/339761/24/54905/116362/54658/6017/54577/83758/94233/340665/131/5947/1592/7026/5948/6010/54576
GO:0003163	BP	sinoatrial node development	11	0.784832	1.58425	0.00156721	0.0196778	0.0161333	3219	tags=64%, list=17%, signal=53%	10021/8913/10804/9096/11149/6474/3670
GO:0010720	BP	positive regulation of cell development	289	0.479524	1.17211	0.0015739	0.0197298	0.016176	5742	tags=41%, list=30%, signal=29%	335/9370/5649/4653/23566/5063/8153/2266/9353/4747/5803/5624/1382/3897/5324/816/57611/23316/6092/140578/443/23363/1826/4135/4915/1813/3815/6608/4036/91584/2852/1946/4099/4137/26011/429/5789/5979/4988/11141/9423/646/2243/22891/5365/89/4803/7122/114798/5139/1638/7732/2670/5270/5176/55679/2290/10979/2737/2244/9001/146433/2043/2915/201294/9148/6604/57165/6474/1524/63950/4131/6387/154288/5764/4352/5746…
GO:0030178	BP	negative regulation of Wnt signaling pathway	166	0.507395	1.22389	0.00159231	0.0199283	0.0163387	4353	tags=37%, list=23%, signal=29%	22943/6422/6425/63923/11197/6424/2719/152573/9241/22881/6423/144165/2735/25928/4920/145258/9096/1000/27120/388336/27303/147906/387914/26585/56033/80114/388630/25937/80319/23072/80199/27123/3489/4163/2254/3484/2737/4776/92162/2487/164284/3090/10076/3670/6657/7162/219287/857/100113407/5071/3485/85409/100507050/64359/51339/3487/4035/7481/102723796/6469/8322/64321
GO:0042403	BP	thyroid hormone metabolic process	27	0.666943	1.48143	0.00159549	0.019936	0.016345	4366	tags=70%, list=23%, signal=54%	3249/6528/1735/7173/2304/90527/53919/6567/50506/1428/405753/1734/51301/1081/53905/1733/10404/7038/1513
GO:0098698	BP	postsynaptic specialization assembly	20	0.698528	1.50833	0.00162369	0.0202556	0.0166071	4684	tags=75%, list=25%, signal=57%	22871/4884/4916/22865/9378/2596/9379/5789/94030/2895/869/57555/26045/85358/84628
GO:0098631	MF	cell adhesion mediator activity	64	0.569568	1.32541	0.00162912	0.0202907	0.0166359	5325	tags=45%, list=28%, signal=33%	128434/22854/1272/57453/6900/57689/6092/84665/53942/1826/23114/152330/8174/4059/5365/8515/27255/83700/342035/11117/91624/64221/284359/22801/23022/10458/4897/4345/133418
GO:0032933	BP	SREBP signaling pathway	15	-0.499103	-1.8953	0.00164112	0.0204073	0.0167315	9504	tags=100%, list=50%, signal=50%	10162/79794/267/22937/51141/51043/83939/6721/11160/10959/55160/10613/3638/6720
GO:0006590	BP	thyroid hormone generation	21	0.69932	1.51655	0.0016558	0.0205569	0.0168541	4366	tags=76%, list=23%, signal=59%	3249/6528/7173/2304/90527/53919/6567/50506/405753/1734/1081/53905/1733/10404/7038/1513
GO:0004526	MF	ribonuclease P activity	11	-0.598965	-1.8418	0.00165913	0.0205594	0.0168562	7610	tags=100%, list=40%, signal=60%	10556/51367/11102/9692/79897/10557/10248/54913/10799/10940
GO:0001504	BP	neurotransmitter uptake	43	0.608587	1.38791	0.00166594	0.0205594	0.0168562	3708	tags=53%, list=20%, signal=43%	477/4842/6538/6512/6616/1813/5865/6506/6622/6540/222962/6511/6530/6570/2670/6581/6531/2668/1812/6532/6571/5071/6539
GO:0035051	BP	cardiocyte differentiation	133	0.517625	1.23721	0.00166594	0.0205594	0.0168562	5819	tags=49%, list=31%, signal=34%	22943/2348/84700/3479/221476/4629/88/93649/144165/23363/9464/6910/5308/9096/148/2852/183/26011/51676/11149/26585/5156/57538/6444/79191/5915/4703/80206/8470/9472/3084/91807/6474/7042/70/5999/3670/655/4892/4208/8320/7273/55553/7478/8324/6546/4624/859/7490/1909/64321/7412/376132/150094/7049/5997/50507/5159/4205/650/1906/4633/7040/54345/10512
GO:0014808	BP	release of sequestered calcium ion into cytosol by sarcoplasmic reticulum	32	0.650647	1.46045	0.0016676	0.0205594	0.0168562	3888	tags=50%, list=21%, signal=40%	477/845/287/5350/6261/10345/844/1756/9472/2946/2281/775/3270/6262/1193/6546
GO:0030285	CC	integral component of synaptic vesicle membrane	28	0.653497	1.45766	0.00166927	0.0205594	0.0168562	1989	tags=43%, list=10%, signal=38%	57030/6860/246213/9145/143425/22987/6857/4986/7781/4985/9900/81615
GO:0043247	BP	telomere maintenance in response to DNA damage	13	-0.52349	-1.864	0.00167376	0.020582	0.0168747	9041	tags=100%, list=48%, signal=52%	54386/2067/51750/24144/64421/65057/55183/7014/7515/328/9937/64858
GO:0098691	CC	dopaminergic synapse	11	0.783176	1.58091	0.00168119	0.0206405	0.0169227	3593	tags=82%, list=19%, signal=66%	1813/148/150/5865/6531/8973/6571/57555/1142
GO:0098810	BP	neurotransmitter reuptake	35	0.634981	1.43289	0.00168435	0.0206466	0.0169276	3708	tags=57%, list=20%, signal=46%	477/4842/6538/6512/1813/5865/6506/6622/6540/222962/6530/6570/6581/6531/2668/1812/6532/6571/5071/6539
GO:0071712	BP	ER-associated misfolded protein catabolic process	12	-0.529586	-1.77943	0.00169424	0.020735	0.0170002	8925	tags=100%, list=47%, signal=53%	7917/6048/55757/23753/56886/550/7353/1861/79139/55768/7415
GO:1904380	BP	endoplasmic reticulum mannose trimming	14	-0.529642	-1.95876	0.00169885	0.0207586	0.0170195	8925	tags=100%, list=47%, signal=53%	80267/7844/84447/55741/11236/6048/10299/267/9695/55757/56886/11253/10206
GO:0010038	BP	response to metal ion	348	0.469153	1.15175	0.00170275	0.0207736	0.0170318	5109	tags=36%, list=27%, signal=27%	5563/7018/22871/4884/55532/169026/3158/5179/84059/845/7031/2167/6331/3777/2266/6860/284111/84258/846/3736/6261/341359/6861/8913/143425/7134/1813/3815/79901/7220/359/6857/1261/3778/3746/7781/4137/4129/6622/429/1740/654/1543/5313/5122/9362/2243/6833/10235/2354/3756/120892/1393/121278/10242/375611/144402/5176/51760/2822/6531/148281/6263/4499/4547/27094/107/2244/4776/3779/8912/91683/6569/83849/387758…
GO:0007631	BP	feeding behavior	105	0.536148	1.27285	0.00172116	0.0209652	0.0171888	6798	tags=66%, list=36%, signal=42%	1268/4886/6869/283869/6900/1271/7345/257194/4852/3358/4915/9464/1813/183/4986/4889/4985/4988/9607/2019/51761/3351/5020/56923/5697/3952/3953/1812/6939/3061/2641/2834/796/7200/6870/4326/5021/123041/5028/51738/680/51083/4987/5539/5457/10716/59272/387129/8013/3375/135/84251/2534/3062/2847/56729/79924/391723/389400/4160/434/112609/3060/885/2693/181/4159/1636/4157
GO:0050767	BP	regulation of neurogenesis	349	0.474348	1.16462	0.00173957	0.0211561	0.0173454	4511	tags=35%, list=24%, signal=27%	5649/9723/223117/4916/7476/2045/23105/23566/5063/8153/9353/6860/7143/4747/5803/2147/1382/9241/283659/3897/5324/816/57611/23316/6092/1620/140578/443/23363/1826/4135/4915/1813/3815/6608/4036/91584/2852/1946/4099/4137/1630/1949/4133/26011/429/5789/4988/11141/9423/2258/1600/6833/22891/5365/4803/114798/1638/11023/23500/7732/2670/79727/9856/5270/57556/56920/5176/2290/10500/2737/9001/4776/146433/23111/2…
GO:0044615	CC	nuclear pore nuclear basket	12	-0.527263	-1.77163	0.00176447	0.0214253	0.0175661	8969	tags=100%, list=47%, signal=53%	8379/7175/5903/1069/4928/9972/56943/55795/1070/129401/4085
GO:0031514	CC	motile cilium	224	0.48681	1.18378	0.00179479	0.0217594	0.01784	6437	tags=53%, list=34%, signal=35%	26762/6869/1811/200162/200373/89876/84229/6954/374407/7802/27285/1769/92749/480/79740/1813/8382/83538/133558/85016/1672/1770/257062/79659/26256/401024/135138/79582/64446/81492/387712/728597/219621/57821/152015/83894/27019/51314/8701/79781/154313/55811/147700/83853/146754/6870/117144/348807/164714/255101/4867/64518/144406/79925/2947/124404/6865/1235/83447/130540/378807/345895/285335/154865/5311/15…
GO:0008038	BP	neuron recognition	49	0.595959	1.37097	0.00183161	0.0221711	0.0181775	4079	tags=53%, list=22%, signal=42%	1268/128434/57453/63923/55118/6900/2596/6092/84665/1826/152330/1949/4685/2042/4692/27255/2290/2043/4978/57463/7852/6091/91624/10371/64221/50863
GO:0017156	BP	calcium-ion regulated exocytosis	65	0.573959	1.33608	0.00185002	0.0222894	0.0182746	3735	tags=43%, list=20%, signal=35%	440279/3745/22999/6854/6860/84258/9699/341359/6861/8911/8913/143425/150/6857/126206/8941/8618/8448/51760/148281/8912/91683/83849/23208/8938/8447/23025/85477
GO:0071867	BP	response to monoamine	107	0.531566	1.26261	0.00185002	0.0222894	0.0182746	6492	tags=59%, list=34%, signal=39%	9370/111/5179/5731/5064/50632/1129/51617/2775/3358/1813/3359/1133/3356/6622/238/5313/3351/3360/170572/120892/9177/1132/390441/1816/285242/85397/2774/1812/333/3363/2781/3354/1131/5999/858/55328/6262/5071/2316/3357/3355/10681/27065/8013/3362/493/3274/1128/3361/3350/284433/1815/11255/219874/200909/390442/26539/1814/5142/54331/59340/3352
GO:0071869	BP	response to catecholamine	107	0.531566	1.26261	0.00185002	0.0222894	0.0182746	6492	tags=59%, list=34%, signal=39%	9370/111/5179/5731/5064/50632/1129/51617/2775/3358/1813/3359/1133/3356/6622/238/5313/3351/3360/170572/120892/9177/1132/390441/1816/285242/85397/2774/1812/333/3363/2781/3354/1131/5999/858/55328/6262/5071/2316/3357/3355/10681/27065/8013/3362/493/3274/1128/3361/3350/284433/1815/11255/219874/200909/390442/26539/1814/5142/54331/59340/3352
GO:1904427	BP	positive regulation of calcium ion transmembrane transport	70	0.566938	1.32619	0.00186843	0.0224067	0.0183707	5083	tags=51%, list=27%, signal=38%	5354/287/2147/9104/10345/799/844/57158/7220/2852/5023/781/6622/9992/342667/930/9472/1812/2946/9001/6769/57165/783/30845/9002/6262/4923/5311/187/10268/6375/387129/3306/2149/5336/825
GO:0050817	BP	coagulation	225	0.488042	1.18691	0.00186843	0.0224067	0.0183707	6526	tags=51%, list=34%, signal=34%	640/1311/1511/7448/2192/22915/7980/222537/6403/2266/5624/2147/170692/150/1607/2160/5340/2153/3827/5023/139189/3848/350/2162/5156/1608/2243/2814/2159/51156/6484/10398/2155/6521/64805/5270/948/653145/2244/9162/2623/2165/152/51206/462/7035/10077/5196/3273/5592/5627/2815/63036/4352/3053/9002/710/5345/5028/80274/340205/375033/857/2316/5294/1361/7057/5054/2157/959/7056/558/7450/2811/5327/725/151/239/64…
GO:0060249	BP	anatomical structure homeostasis	315	0.473652	1.1606	0.00186843	0.0224067	0.0183707	7161	tags=52%, list=38%, signal=33%	1268/7018/7032/10590/340547/1311/4588/4057/7275/213/6441/12/84059/5950/7031/6456/65217/64072/6543/491/482/5745/1280/5166/51208/9455/10804/1258/6608/124590/387597/5340/24/58494/4760/5023/3908/3512/154/3848/1756/9607/145226/3351/338773/2651/6833/9153/4753/65267/7122/6121/25937/4054/6530/492/4130/284/645811/23418/83700/63978/196740/2623/158046/796/783/340719/7287/10000/1901/9079/8029/317719/728378/5…
GO:0072378	BP	blood coagulation, fibrin clot formation	15	0.736068	1.54166	0.00188389	0.0225508	0.0184888	4126	tags=80%, list=22%, signal=63%	2192/2266/350/2162/2243/2814/2244/2165/462/2815/2157/2811
GO:0019908	CC	nuclear cyclin-dependent protein kinase holoenzyme complex	10	-0.611917	-1.87604	0.00188627	0.0225508	0.0184888	7364	tags=100%, list=39%, signal=61%	8621/8812/51755/1025/904/4331/902/56647/1022
GO:0048864	BP	stem cell development	88	0.538757	1.26921	0.00190542	0.0227447	0.0186478	5895	tags=52%, list=31%, signal=36%	2348/9723/223117/8854/7476/2066/55698/9464/5308/6608/1000/2247/5979/9965/8929/1910/57556/56920/8092/2668/10500/3084/54437/2303/340665/3670/655/8482/1908/30812/3357/10371/6899/1909/6469/3911/80031/8828/10501/8829/54910/1906/5788/64218/10512/2335
GO:0034707	CC	chloride channel complex	51	0.597672	1.3785	0.00194242	0.0231382	0.0189705	5676	tags=65%, list=30%, signal=45%	2567/2569/2566/2556/1188/2743/2561/8001/1187/2558/55879/2554/2568/54102/266675/57348/1180/144453/2562/2564/2565/2741/1193/94015/200959/2559/57101/54831/2570/25932/2555/2560/9022
GO:0090659	BP	walking behavior	31	0.648637	1.45331	0.00194436	0.0231382	0.0189705	4046	tags=52%, list=21%, signal=41%	7545/6900/7345/2743/1813/1949/1600/6323/1812/2043/57731/58524/7200/2636/2741/57626
GO:0000400	MF	four-way junction DNA binding	17	-0.460032	-1.95389	0.00194883	0.0231558	0.0189849	10245	tags=82%, list=54%, signal=38%	5892/5890/2956/7486/641/7517/4221/57697/3146/4436/348654/3148/7516/3149
GO:0016917	MF	GABA receptor activity	22	0.685984	1.49075	0.00195217	0.02316	0.0189883	5409	tags=91%, list=29%, signal=65%	2567/2569/2566/2556/2561/2558/55879/165829/9568/2554/2568/2562/2564/2565/2550/200959/2559/2570/2555/2560
GO:0097449	CC	astrocyte projection	19	0.702555	1.51246	0.00195807	0.0231945	0.0190166	2705	tags=47%, list=14%, signal=41%	3776/6860/246213/2913/482/361/6506/2670/2915
GO:0060272	BP	embryonic skeletal joint morphogenesis	11	0.779912	1.57432	0.00196632	0.0232566	0.0190675	3238	tags=64%, list=17%, signal=53%	9241/1280/130497/3373/6474/3227/655
GO:0001657	BP	ureteric bud development	94	0.542152	1.28073	0.00197942	0.0233759	0.0191653	5831	tags=56%, list=31%, signal=39%	80000/6422/9353/2719/9241/10736/2302/6092/7484/6608/183/2247/5979/26585/9244/5915/170690/54361/130497/168667/2138/6943/5076/2668/2737/7471/2303/7482/655/186/7475/8642/5087/30812/3237/6492/9500/5311/6299/7490/7481/6469/3911/2246/51804/5727/4070/650/10409/255743/2625/3975/2263
GO:0043194	CC	axon initial segment	19	0.702004	1.51127	0.00199537	0.0235283	0.0192903	5225	tags=89%, list=28%, signal=65%	6900/3736/23114/3739/1261/4133/6334/3737/6323/4130/57731/80128/57554/3785/3786/4897/89796
GO:0042475	BP	odontogenesis of dentin-containing tooth	89	0.543946	1.28195	0.00201642	0.0237404	0.0194642	4410	tags=43%, list=23%, signal=33%	4804/2255/340419/10117/6331/25928/9464/6608/256764/1747/5156/431707/1834/2736/645811/2737/401138/6569/58524/10468/6336/54757/655/7475/80326/8626/123041/258/1758/1896/5054/4982/9313/6899/6469/3911/54959/56975
GO:0042809	MF	nuclear vitamin D receptor binding	15	-0.490497	-1.86263	0.00202552	0.0238114	0.0195224	9667	tags=100%, list=51%, signal=49%	6879/9969/5469/6882/10025/6256/10766/9967/9440/22938/90390/9282/9862/29079
GO:0008089	BP	anterograde axonal transport	49	0.593803	1.36601	0.00205341	0.0240299	0.0197015	2630	tags=27%, list=14%, signal=23%	547/8120/84871/4747/50632/3798/4133/1740/84709/4130/9638/3800/9001
GO:0098632	MF	cell-cell adhesion mediator activity	54	0.57867	1.33761	0.00205341	0.0240299	0.0197015	5325	tags=44%, list=28%, signal=32%	128434/22854/1272/57453/6900/57689/6092/84665/53942/1826/23114/152330/5365/27255/83700/342035/91624/64221/284359/23022/10458/4897/4345/133418
GO:0098802	CC	plasma membrane signaling receptor complex	182	0.498519	1.20588	0.00205341	0.0240299	0.0197015	7437	tags=64%, list=39%, signal=39%	7018/5354/27092/2903/1271/729993/2891/8516/269/658/2901/2899/799/973/2898/375567/3359/2893/388336/440829/9358/165829/2890/9568/1137/2814/974/170572/2900/8515/126129/9177/1141/3674/1143/2892/59284/118427/285242/8973/2895/3680/3681/402117/2911/10077/3679/1136/10267/54518/2815/1742/11117/926/3645/1142/9180/1145/10266/2550/148738/27091/2811/10368/10268/729956/93145/10333/50852/10369/22801/1439/3570/3…
GO:0045842	BP	positive regulation of mitotic metaphase/anaphase transition	15	-0.489836	-1.86011	0.00208466	0.0242795	0.0199062	6180	tags=93%, list=33%, signal=63%	996/286053/51434/51529/51433/8452/29945/8697/8881/5925/9700/9587/9787/81620
GO:1901970	BP	positive regulation of mitotic sister chromatid separation	15	-0.489836	-1.86011	0.00208466	0.0242795	0.0199062	6180	tags=93%, list=33%, signal=63%	996/286053/51434/51529/51433/8452/29945/8697/8881/5925/9700/9587/9787/81620
GO:0006942	BP	regulation of striated muscle contraction	90	0.535134	1.26214	0.00209041	0.0242795	0.0199062	5897	tags=52%, list=31%, signal=36%	1113/477/10021/4842/845/287/6331/4634/6547/5350/7140/6329/844/148/29119/1756/2258/89/4607/2946/147/6336/30845/2281/775/3270/6262/857/5294/1193/6546/7137/1490/51086/859/59272/390594/59341/4878/5997/3164/8654/2702/4625/4633/134/1760
GO:0019955	MF	cytokine binding	140	0.514449	1.23209	0.00209041	0.0242795	0.0199062	6003	tags=55%, list=32%, signal=38%	64388/1311/2532/124857/1271/2690/1991/9241/3977/658/25928/643/8646/3815/3568/2247/26585/1238/9244/9173/199713/4054/222663/64109/8200/3953/948/1236/4052/1233/3554/2/1524/8425/2826/114990/135228/7852/2615/1235/9180/7057/116379/2829/148738/133396/1232/729230/3593/8322/10803/7049/3570/7043/3690/3598/8828/50964/3592/221044/53833/1438/8829/3590/375387/57007/10148/7048/2022/100507588/3572/3587/57045/367…
GO:0005911	CC	cell-cell junction	495	0.457434	1.12897	0.00209041	0.0242795	0.0199062	5755	tags=38%, list=30%, signal=27%	1501/9071/28513/57863/3249/152404/9074/4804/5010/477/1674/117/5101/287/6331/83872/149461/6330/84623/6442/23768/11155/84952/6514/84063/57216/5239/23363/51208/1008/5348/1825/575/10804/23284/56666/23114/4856/3815/114800/5317/1000/387597/1946/220296/6326/64405/23336/58494/4619/116337/23037/11149/29119/9900/1007/5587/4868/9863/27295/23705/126374/4620/2258/3737/54587/57369/8777/5244/65267/7122/57481/63…
GO:0033605	BP	positive regulation of catecholamine secretion	13	0.759671	1.56274	0.0021017	0.0243741	0.0199837	3348	tags=77%, list=18%, signal=63%	3745/7432/6857/4986/9607/5020/1141/2668/6387/5021
GO:0006956	BP	complement activation	57	0.587307	1.36059	0.00212741	0.0245619	0.0201377	4918	tags=58%, list=26%, signal=43%	1380/730/4239/1191/729/5648/78989/718/3848/721/1378/720/100423062/3078/1401/3543/716/2/55061/735/3075/710/715/1675/5199/2219/81494/725/1379/731/4153/3426/10747
GO:0002028	BP	regulation of sodium ion transport	85	0.545781	1.28345	0.00212741	0.0245619	0.0201377	6304	tags=55%, list=33%, signal=37%	6327/477/1272/486/4842/6331/6330/55800/286183/482/154215/5348/1813/2259/79570/128414/154/2257/1756/53826/2258/130497/65267/23072/53822/5270/57731/5187/53828/6640/6324/6546/859/81832/7402/493/150094/4846/2040/54997/1815/51297/2256/1760/1814/57520/154043
GO:0007599	BP	hemostasis	227	0.488442	1.18791	0.00212741	0.0245619	0.0201377	6526	tags=52%, list=34%, signal=34%	640/1311/1511/7448/2192/22915/7980/6403/2266/5624/2147/554/170692/150/1607/2160/5340/2153/3827/7166/5023/139189/3848/350/2162/5156/1608/2243/2814/2159/51156/6484/10398/2155/6521/64805/5270/948/653145/2244/9162/2623/2165/152/51206/462/7035/10077/5196/3273/5592/5627/2815/63036/4352/3053/9002/710/5345/5028/80274/340205/375033/857/2316/5294/1361/7057/5054/2157/959/7056/558/7450/2811/5327/725/151/239/…
GO:2000622	BP	regulation of nuclear-transcribed mRNA catabolic process, nonsense-mediated decay	11	-0.586878	-1.80463	0.00213489	0.0246116	0.0201785	7839	tags=100%, list=41%, signal=59%	22794/339/51594/9704/79048/4116/9775/26986/29974/3182
GO:0048670	BP	regulation of collateral sprouting	19	0.700201	1.50739	0.00214455	0.0246862	0.0202396	2949	tags=58%, list=16%, signal=49%	2045/23105/23566/8153/1382/1946/1630/2258/4803/23111/5802
GO:0060675	BP	ureteric bud morphogenesis	63	0.569043	1.32322	0.00216441	0.0248778	0.0203967	5793	tags=62%, list=31%, signal=43%	80000/2719/9241/10736/7484/6608/183/2247/26585/170690/54361/2138/6943/5076/2668/2737/7471/7482/186/7475/8642/5087/30812/3237/9500/5311/6299/7490/7481/6469/3911/2246/51804/5727/4070/650/255743/2625/3975
GO:0005828	CC	kinetochore microtubule	18	-0.454142	-2.02795	0.00218248	0.0250484	0.0205366	10357	tags=100%, list=55%, signal=45%	79643/57132/27243/23122/51652/91782/128866/29082/25978/5119/9735/8766/9183/51510/1062/81930/92421
GO:0031125	BP	rRNA 3'-end processing	10	-0.605618	-1.85672	0.00219422	0.0251168	0.0205926	2144	tags=80%, list=11%, signal=71%	51010/112479/90459/5393/23016/23404/6227/11340
GO:0045762	BP	positive regulation of adenylate cyclase activity	36	0.619977	1.40002	0.0022014	0.0251168	0.0205926	4755	tags=61%, list=25%, signal=46%	2740/7434/116/155/554/154/1394/49/1816/1812/2692/10486/796/59350/2492/7253/122042/775/3973/1909/2696/153
GO:0003407	BP	neural retina development	70	0.565534	1.3229	0.0022014	0.0251168	0.0205926	4286	tags=46%, list=23%, signal=36%	6496/57030/246213/6096/2823/1735/54549/491/91156/121643/23363/1826/4915/4760/7068/51761/7021/6121/23418/348980/57010/6604/30813/7042/5797/8842/6247/221935/30812/57096/3549/84465
GO:0010522	BP	regulation of calcium ion transport into cytosol	97	0.541472	1.28157	0.0022014	0.0251168	0.0205926	4779	tags=46%, list=25%, signal=35%	477/117/4842/845/287/2147/5350/10345/22953/57338/799/844/57158/84502/7220/2852/5023/6622/5587/1756/930/9472/1812/2946/5319/9001/2281/9002/126306/775/3270/6262/857/4923/1193/7222/6546/5311/187/10268/6375/387129/5026/2149/201140
GO:0019841	MF	retinol binding	16	0.722694	1.52453	0.00223263	0.0254356	0.020854	3675	tags=75%, list=19%, signal=61%	9227/1381/5950/1382/127/339761/54905/116362/6017/83758/131/5947
GO:0051339	BP	regulation of lyase activity	74	0.559759	1.31128	0.0022384	0.0254639	0.0208772	4755	tags=53%, list=25%, signal=40%	2740/7434/4842/4883/84059/116/10886/5064/155/2913/554/1813/2587/2981/53836/154/9568/1394/5957/49/343035/1910/1816/1812/2692/10486/796/59350/2492/7253/122042/775/3973/2550/729230/1909/2696/4846/153
GO:0006264	BP	mitochondrial DNA replication	14	-0.514676	-1.90342	0.00226066	0.0256794	0.0210539	1331	tags=64%, list=7%, signal=60%	9093/56652/50484/1763/92667/6742/30968/6240/2021
GO:1903351	BP	cellular response to dopamine	90	0.534127	1.25977	0.0022754	0.025809	0.0211601	6492	tags=59%, list=34%, signal=39%	111/5731/5064/50632/1129/51617/2775/3358/1813/3359/1133/3356/238/3351/3360/170572/120892/9177/1132/390441/1816/285242/85397/2774/1812/3363/2781/3354/1131/5999/858/5071/2316/3357/3355/10681/27065/3362/3274/1128/3361/3350/284433/1815/11255/219874/200909/390442/26539/1814/54331/59340/3352
GO:0048172	BP	regulation of short-term neuronal synaptic plasticity	15	0.730424	1.52984	0.00227939	0.0258164	0.0211663	1187	tags=47%, list=6%, signal=44%	6860/729993/6543/9145/2898/388336/440829
GO:0014704	CC	intercalated disc	49	0.590934	1.35941	0.0023124	0.026038	0.0213479	4222	tags=45%, list=22%, signal=35%	477/1674/287/6331/6330/5239/23363/5348/1000/6326/4619/29119/2258/6323/9472/3741/57731/4892/6324/6546/10052/859
GO:0050818	BP	regulation of coagulation	70	0.56463	1.32079	0.0023124	0.026038	0.0213479	4978	tags=56%, list=26%, signal=41%	7448/222537/2266/5624/2147/170692/2160/5340/3827/3848/350/5156/2243/6484/2155/5270/948/2244/462/7035/3273/5592/5627/710/5345/857/1361/7057/5054/7056/2811/5327/239/5055/3818/2149/947/4846/6915
GO:0048786	CC	presynaptic active zone	75	0.557663	1.30686	0.0023124	0.026038	0.0213479	4990	tags=47%, list=26%, signal=35%	140730/27445/440279/22854/22999/57030/2823/9699/491/1008/2917/1000/150/2852/5023/26059/8499/9900/6853/8506/320/84446/9381/8927/23208/5028/23025/8497/114/2983/6855/493/84628/135/133584
GO:0006821	BP	chloride transport	109	0.528046	1.25478	0.0023124	0.026038	0.0213479	6482	tags=59%, list=34%, signal=39%	203859/2567/1811/63982/2569/2566/2556/1188/1179/846/2743/115111/5348/2561/8001/1187/2558/55879/6559/115019/121601/5593/2554/2568/54102/266675/6521/375611/6557/57348/1180/2915/10316/144453/9635/2562/2564/2565/57282/5243/2741/1193/760/94015/200959/50636/2559/57101/7809/54831/2570/25932/2555/6560/2560/5172/9022/5030/22802/2742/116369/57468/1185/5621
GO:0042178	BP	xenobiotic catabolic process	25	0.666912	1.47	0.00232167	0.0261045	0.0214025	3407	tags=52%, list=18%, signal=43%	5446/4842/1559/1557/1543/1548/54658/1555/2946/1558/8856/1544/2947
GO:0005796	CC	Golgi lumen	103	0.524269	1.24344	0.00234939	0.0263397	0.0215953	6564	tags=57%, list=35%, signal=38%	4969/4586/143662/5549/4588/7476/4958/2719/5624/2147/11081/394263/283463/1672/653808/2262/54361/1634/4803/2159/1670/2155/7477/10082/94025/1463/7471/5627/6649/7475/4584/4060/1081/4325/2157/727897/2331/1462/7369/6383/3339/8074/200958/2817/633/1669/221914/1673/1464/7040/10057/5125/3906/4585/7474/89780/81029/6385/4320
GO:0008237	MF	metallopeptidase activity	184	0.497486	1.20347	0.00234939	0.0263397	0.0215953	5015	tags=40%, list=26%, signal=30%	80332/84871/1359/1369/1179/60676/171019/1357/8745/29953/11095/7092/4316/1363/80070/170692/89932/290/1360/206338/64180/170690/119587/388630/8510/11086/9427/8532/81794/10003/1368/10893/57094/118856/7512/9510/51200/9635/4313/164656/9508/170691/4326/170689/4185/7093/4325/5251/1361/10863/8747/53616/79148/10404/9313/11085/64174/25797/203102/2515/59272/93979/79805/56999/11174/3792/4327/56265/5645/64066/…
GO:2000463	BP	positive regulation of excitatory postsynaptic potential	25	0.665858	1.46768	0.00235882	0.0264072	0.0216506	4699	tags=68%, list=25%, signal=51%	22871/152404/5649/7476/22999/9378/9699/23316/154/50944/54413/5999/57555/1742/81832/85358/10458
GO:0051918	BP	negative regulation of fibrinolysis	10	0.777609	1.54463	0.00237753	0.0265783	0.0217909	3948	tags=90%, list=21%, signal=71%	2147/5340/350/3273/5345/1361/7057/5054/7056
GO:0019098	BP	reproductive behavior	44	0.609252	1.39207	0.00238639	0.0266005	0.0218091	3437	tags=48%, list=18%, signal=39%	1268/63951/6869/6863/7432/1620/23542/4986/5023/7068/5020/4808/1910/5270/1816/1812/6532/552/5021/5028/551
GO:0031589	BP	cell-substrate adhesion	357	0.468147	1.15025	0.00238639	0.0266005	0.0218091	7656	tags=56%, list=40%, signal=34%	3175/347/335/9723/22854/6422/4653/26033/23671/7448/79625/6366/2192/63923/7148/340533/5314/88/2266/25890/55698/8516/482/3897/4852/5212/158326/375567/10391/11170/151887/1946/8174/5340/9358/10516/8910/8499/7007/11149/26585/2042/54361/2243/2651/1295/4059/89/340706/90102/136227/2199/8515/10232/3674/948/1236/55679/284/83700/10979/10580/57348/2244/3680/2294/201294/7471/59277/3681/3204/395/3679/7010/1842…
GO:0043240	CC	Fanconi anaemia nuclear complex	13	-0.511115	-1.81994	0.00242308	0.0269169	0.0220685	1675	tags=62%, list=9%, signal=56%	2178/2188/378708/2176/2189/201254/2175/2187
GO:0005652	CC	nuclear lamina	10	-0.60057	-1.84125	0.00242519	0.0269169	0.0220685	7579	tags=100%, list=40%, signal=60%	26502/4000/3141/256329/8573/3692/6839/4001/5111
GO:0032356	MF	oxidized DNA binding	10	-0.599831	-1.83898	0.00242519	0.0269169	0.0220685	7593	tags=100%, list=40%, signal=60%	4968/25913/2956/7486/641/7515/4436/6188/9401
GO:0030681	CC	multimeric ribonuclease P complex	10	-0.598934	-1.83623	0.00245086	0.0271132	0.0222295	7610	tags=100%, list=40%, signal=60%	10556/51367/11102/79897/10557/10248/54913/10799/10940
GO:0033204	MF	ribonuclease P RNA binding	10	-0.598934	-1.83623	0.00245086	0.0271132	0.0222295	7610	tags=100%, list=40%, signal=60%	10556/51367/11102/79897/10557/10248/54913/10799/10940
GO:0051283	BP	negative regulation of sequestering of calcium ion	119	0.527181	1.25691	0.00246039	0.0271132	0.0222295	5172	tags=46%, list=27%, signal=34%	477/4842/6366/845/6363/287/2147/5350/6261/10345/57338/3358/844/57158/1813/84502/7220/2852/55283/2247/3356/6622/5587/1756/2814/930/9472/1236/6263/1812/2946/9001/2281/2815/3708/9002/126306/775/3270/6262/4923/3357/1193/6546/2829/2811/5311/187/6375/387129/2149/201140/5336/825/7442
GO:0046660	BP	female sex differentiation	124	0.520005	1.24096	0.00246039	0.0271132	0.0222295	4791	tags=40%, list=25%, signal=30%	64478/63951/6422/2255/117/3623/5950/9468/9353/5241/117154/269/658/174/23414/6092/132625/3815/4036/6586/5156/54361/56956/2099/431707/3952/2/9510/10468/4313/668/2492/5798/8626/6716/3973/5806/2069/1299/1588/558/7490/3625/8322/4327/7026/89766/4846/2516
GO:0017157	BP	regulation of exocytosis	202	0.488451	1.1843	0.00246039	0.0271132	0.0222295	4949	tags=37%, list=26%, signal=27%	1268/140730/27445/22871/640/3745/115827/7476/203190/2266/6860/84258/9699/9515/341359/6861/8911/8913/143425/1813/148/150/5865/6857/5023/3356/6622/5217/11141/8941/3351/2243/8618/120892/8448/57126/6853/51760/148281/8973/1812/107/2244/9001/2623/8912/91683/2294/201294/320/83849/783/5579/5413/23208/5582/8938/8447/5028/10814/1142/5071/2213/2242/729230/5414/55503/192683/23621/6855/2624/3565/135/3598
GO:0035850	BP	epithelial cell differentiation involved in kidney development	48	0.590976	1.35746	0.00249738	0.027404	0.0224679	5793	tags=60%, list=31%, signal=42%	9370/28999/10736/2302/7484/6608/26585/4868/9863/130497/25937/1910/5076/2668/59/2303/9788/4208/7827/8842/6299/7490/1909/947/4853/10409/3913/2625/3975
GO:0022029	BP	telencephalon cell migration	58	0.574198	1.33145	0.00249738	0.027404	0.0224679	4035	tags=45%, list=21%, signal=35%	5649/6900/9353/7143/10718/1813/5455/285025/8941/2258/1600/120892/64805/89927/2290/1812/2737/3084/7101/266727/6387/7852/26468/6091/85458/27185
GO:0072088	BP	nephron epithelium morphogenesis	74	0.558591	1.30854	0.00249738	0.027404	0.0224679	5793	tags=58%, list=31%, signal=41%	80000/2719/9241/10736/7484/6608/183/2247/26585/79191/170690/54361/130497/2138/6943/26249/5076/2668/2737/7471/7482/79192/186/7475/8642/5087/30812/3237/9500/5311/6299/7490/7481/6469/3911/2246/51804/5727/4070/650/255743/2625/3975
GO:0007216	BP	G protein-coupled glutamate receptor signaling pathway	15	0.726506	1.52163	0.00250544	0.0274535	0.0225085	2993	tags=60%, list=16%, signal=51%	2913/2899/9455/2917/2914/2916/2915/2911/4308
GO:0006743	BP	ubiquinone metabolic process	18	-0.447648	-1.99895	0.00252821	0.0276639	0.022681	10480	tags=100%, list=55%, signal=45%	79934/56997/80219/51004/10229/29914/84883/84274/160760/57107/57017/51117/51805/27235/4704/2232/23590
GO:0072078	BP	nephron tubule morphogenesis	72	0.56088	1.31307	0.00253438	0.0276923	0.0227043	5793	tags=60%, list=31%, signal=42%	80000/2719/9241/10736/7484/6608/183/2247/26585/79191/170690/54361/130497/2138/6943/26249/5076/2668/2737/7471/7482/79192/186/7475/8642/5087/30812/3237/9500/5311/6299/7490/7481/6469/3911/2246/51804/5727/4070/650/255743/2625/3975
GO:0032094	BP	response to food	37	0.625006	1.4144	0.00257138	0.0278998	0.0228744	3422	tags=46%, list=18%, signal=38%	2690/4852/6338/80763/340204/1543/4988/9607/1208/5020/100507055/4353/3952/389383/2520/5582/51738
GO:0019934	BP	cGMP-mediated signaling	35	0.625347	1.41115	0.00257138	0.0278998	0.0228744	4749	tags=69%, list=25%, signal=51%	4880/3358/2981/10900/5152/10335/50940/5138/5139/3000/4881/1910/948/2982/4879/5592/2977/3747/7057/3357/10846/2983/4882/4878
GO:0006958	BP	complement activation, classical pathway	36	0.616187	1.39146	0.00257138	0.0278998	0.0228744	4918	tags=61%, list=26%, signal=45%	1380/730/1191/729/718/721/1378/720/100423062/1401/3543/716/55061/735/710/715/725/1379/731/4153/3426/10747
GO:0001658	BP	branching involved in ureteric bud morphogenesis	57	0.583869	1.35263	0.00257138	0.0278998	0.0228744	5793	tags=65%, list=31%, signal=45%	80000/2719/9241/10736/7484/6608/183/2247/26585/170690/54361/2138/6943/5076/2668/2737/7471/7482/186/7475/8642/5087/30812/3237/9500/5311/6299/7490/6469/3911/2246/51804/5727/4070/650/255743/3975
GO:0090277	BP	positive regulation of peptide hormone secretion	89	0.539254	1.27089	0.00257138	0.0278998	0.0228744	4007	tags=38%, list=21%, signal=30%	640/2850/169026/9971/222546/5950/116/2266/846/2695/1813/2922/25924/2645/2852/114131/8431/2243/6343/2822/388581/2244/2641/2692/7200/3670/57555/8938/6690/8447/51738/2864/2550/114
GO:0006744	BP	ubiquinone biosynthetic process	17	-0.447624	-1.90119	0.00258087	0.0279246	0.0228947	10480	tags=35%, list=55%, signal=16%	51117/51805/27235/4704/2232/23590
GO:1901663	BP	quinone biosynthetic process	17	-0.447624	-1.90119	0.00258087	0.0279246	0.0228947	10480	tags=35%, list=55%, signal=16%	51117/51805/27235/4704/2232/23590
GO:0031011	CC	Ino80 complex	15	-0.482737	-1.83316	0.00258733	0.0279555	0.02292	9814	tags=100%, list=52%, signal=48%	83444/283899/4798/7528/10445/54617/54891/93973/8607/10856/125476/79913/86/51377
GO:0001578	BP	microtubule bundle formation	117	0.52815	1.25865	0.00260838	0.0280383	0.022988	6382	tags=57%, list=34%, signal=38%	827/200162/89876/1641/54768/84229/374407/27285/1769/92749/2302/83538/55130/79864/164781/4133/401024/79582/64446/81492/160762/27019/57545/115948/85452/9148/154313/146754/4131/348807/255101/246176/126820/79925/56171/94137/123872/80128/54777/136332/284067/345895/2242/93233/159686/57701/54839/9576/51673/8632/1767/6101/55329/344148/89796/23639/146562/80217/51364/387885/286464/25876/284076/79819/85478/…
GO:0046545	BP	development of primary female sexual characteristics	109	0.527094	1.25252	0.00260838	0.0280383	0.022988	4791	tags=39%, list=25%, signal=30%	64478/63951/6422/117/3623/9468/9353/5241/117154/269/658/174/23414/6092/132625/3815/6586/5156/54361/56956/2099/431707/3952/2/9510/10468/4313/668/2492/5798/3973/5806/2069/1299/1588/7490/3625/8322/4327/7026/89766/4846/2516
GO:0003206	BP	cardiac chamber morphogenesis	123	0.518542	1.23712	0.00260838	0.0280383	0.022988	5831	tags=51%, list=31%, signal=36%	5950/9353/4634/9241/6423/1363/23414/6092/9464/7134/6910/6608/4036/4889/653/6586/4607/3084/8701/2294/9510/6604/6474/2303/7010/7042/3670/655/4208/26508/3491/57493/6262/57057/6091/7139/4887/7137/5457/4624/6899/187/859/2535/1909/7481/7049/6909/4846/4853/8321/8828/9421/8829/7048/650/2022/4625/4633/7040/2625/10512/2263
GO:0097267	BP	omega-hydroxylase P450 pathway	10	0.776012	1.54146	0.00260948	0.0280383	0.022988	3057	tags=80%, list=16%, signal=67%	1545/1559/1557/1579/1543/1558/113612/1544
GO:0017022	MF	myosin binding	72	0.560584	1.31238	0.00264537	0.0283846	0.0232719	5688	tags=46%, list=30%, signal=32%	115827/4604/4653/4634/9515/25924/5865/55323/29881/1756/4868/4626/10398/51560/4336/116442/4607/9001/70/800/55243/7852/85409/22998/4635/558/7399/58/2934/257144/54558/57477/4633
GO:0031526	CC	brush border membrane	55	0.583917	1.35021	0.00268237	0.0287021	0.0235322	3379	tags=42%, list=18%, signal=34%	55600/2348/1811/10568/50617/11136/9154/79901/4036/340024/6519/140803/9153/54825/948/1816/762/4547/6569/8029/5174/116085/10786
GO:0048515	BP	spermatid differentiation	178	0.498554	1.20509	0.00268237	0.0287021	0.0235322	6382	tags=48%, list=34%, signal=32%	1811/84229/6954/163589/283417/4948/6691/29118/3815/22873/8382/346288/1672/26108/58494/257062/26256/401024/135138/79582/374308/26038/81492/338773/204474/6847/64753/160762/56163/171483/168391/152015/63946/132612/50846/83700/171484/64100/9148/154313/147700/83853/11055/255101/317719/221481/4867/6690/79925/1235/284067/375337/378807/146849/159686/5414/100131137/9389/284071/257044/9444/9576/140732/3306/…
GO:0045263	CC	proton-transporting ATP synthase complex, coupling factor F(o)	12	-0.510401	-1.71497	0.00269948	0.0288453	0.0236496	2409	tags=67%, list=13%, signal=58%	10632/10476/539/9551/515/516/521/518
GO:0005245	MF	voltage-gated calcium channel activity	45	0.60259	1.37748	0.00271937	0.0288984	0.0236931	4832	tags=67%, list=25%, signal=50%	1268/774/27092/59285/6261/785/8911/8913/781/779/4988/3351/55799/9254/773/59284/786/777/8912/783/117144/775/117531/378807/27091/10368/5311/117532/10369/255022
GO:0048168	BP	regulation of neuronal synaptic plasticity	50	0.58797	1.35436	0.00271937	0.0288984	0.0236931	4588	tags=54%, list=24%, signal=41%	6900/6860/729993/6543/9145/57338/816/2898/1813/3815/388336/440829/183/23237/6622/51201/2915/9148/1742/1627/57282/1959/729956/81832/85358/6855/815
GO:0007286	BP	spermatid development	172	0.495829	1.1975	0.00271937	0.0288984	0.0236931	6382	tags=48%, list=34%, signal=32%	1811/84229/6954/163589/283417/4948/6691/29118/3815/22873/8382/346288/1672/26108/58494/257062/26256/401024/135138/79582/374308/26038/81492/204474/6847/64753/160762/56163/171483/168391/152015/63946/132612/50846/83700/171484/64100/9148/154313/147700/83853/11055/255101/317719/221481/6690/79925/1235/284067/375337/378807/146849/159686/100131137/9389/284071/257044/9444/9576/140732/3306/5620/199223/55329…
GO:0005342	MF	organic acid transmembrane transporter activity	160	0.495333	1.1929	0.00271937	0.0288984	0.0236931	4166	tags=35%, list=22%, signal=28%	28965/55117/56301/1811/6545/57709/57030/55089/9058/84889/246213/6538/284111/6542/114571/6512/11136/220963/115111/4948/6555/201780/9194/6579/123264/6506/340024/6519/6540/222962/160728/10991/115019/53919/6511/153201/6567/375611/9122/948/64849/10599/8647/6554/120103/151258/54716/159963/9963/5243/387700/6539/113235/83733/162515/9152
GO:0061333	BP	renal tubule morphogenesis	76	0.557624	1.30705	0.00279337	0.0295631	0.0242381	5793	tags=59%, list=31%, signal=41%	80000/2719/9241/10736/7484/6608/183/2247/26585/79191/170690/54361/130497/2138/6943/26249/5076/2668/2737/7471/7482/9788/79192/186/4208/7475/8642/5087/30812/3237/9500/5311/6299/7490/7481/6469/3911/2246/51804/5727/4070/650/255743/2625/3975
GO:0005901	CC	caveola	82	0.548984	1.28912	0.00279337	0.0295631	0.0242381	5033	tags=49%, list=27%, signal=36%	5740/477/729085/117/6331/8436/5348/6608/148/1946/3778/3356/11149/120892/948/9472/6531/10580/30846/3741/147/23209/7035/1013/9356/858/7223/284119/857/112464/114/859/10395/8611/493/6401/2149/4846/5727/5743
GO:0003007	BP	heart morphogenesis	246	0.483163	1.17705	0.00279337	0.0295631	0.0242381	7603	tags=59%, list=40%, signal=36%	4886/22943/2348/8854/5950/9353/2006/4634/55273/23768/9241/6423/121643/6261/1363/1280/23414/140628/6092/57216/9464/7134/6910/5308/6608/4036/4889/51676/653/6586/7122/10439/2138/4607/344022/65009/79933/3084/8701/2294/9510/6604/6474/2303/7010/51384/1901/7042/70/27063/3670/655/4208/26508/8642/3491/4838/57493/6262/123872/140706/7273/57057/2316/6091/6862/7139/145873/3357/8463/129446/4887/7137/5457/4624/…
GO:0051984	BP	positive regulation of chromosome segregation	14	-0.50684	-1.87443	0.002823	0.029836	0.0244619	1186	tags=50%, list=6%, signal=47%	55920/56852/9587/9212/990/891/81620
GO:0009954	BP	proximal/distal pattern formation	34	0.624741	1.40843	0.00286736	0.0302224	0.0247786	3609	tags=50%, list=19%, signal=41%	8854/3226/2255/6496/2735/26585/2019/79191/130497/2736/2737/3236/79192/3227/4838/8626/5087
GO:0007018	BP	microtubule-based movement	392	0.466931	1.14816	0.00286736	0.0302224	0.0247786	6459	tags=42%, list=34%, signal=29%	547/56776/338/8120/6869/7275/200162/200373/89876/221458/84871/4747/1780/54768/84229/50632/7345/54514/9104/27285/1769/92749/8911/3798/480/79740/361/22873/8382/83538/55130/1672/79864/144535/1770/127602/164781/4137/257062/79659/26256/4133/401024/83657/1740/4744/79582/25893/64446/81492/387712/203074/79645/25999/160762/84709/152015/83894/66000/4130/27019/9638/115948/63978/124602/3800/9001/51314/8701/3…
GO:0050773	BP	regulation of dendrite development	97	0.538167	1.27375	0.00290436	0.0305293	0.0250302	3579	tags=35%, list=19%, signal=29%	5649/5063/158866/577/816/23316/23363/114788/29993/1630/5789/238/11141/653/4139/124925/1608/23072/1996/50674/1141/9856/7436/85442/4776/2043/7101/1136/154288/5764/655/1627/3196/7224
GO:0090276	BP	regulation of peptide hormone secretion	174	0.49572	1.19707	0.00290436	0.0305293	0.0250302	3422	tags=30%, list=18%, signal=25%	1268/111/640/6422/3745/1113/2850/169026/9971/222546/5950/116/2266/846/2695/6616/143425/3358/1813/4856/2922/25924/150/2645/2852/1946/4760/114131/8431/9607/9024/2243/6833/7021/6343/1393/3952/2822/3741/388581/2244/2641/2692/7200/2281/2044/63036/3670/57555/8938/6690/8447/51738
GO:0019933	BP	cAMP-mediated signaling	50	0.586716	1.35147	0.00294136	0.0308763	0.0253147	5517	tags=58%, list=29%, signal=41%	6344/2740/117/116/2695/108/27115/1672/50940/5138/51555/5139/6343/118442/9472/2770/107/2692/5443/10486/2044/51083/4987/187/23551/2696/5140/10411/8844
GO:0014003	BP	oligodendrocyte development	39	0.61332	1.39131	0.00297835	0.0312223	0.0255984	2596	tags=31%, list=14%, signal=27%	5354/1272/6900/1191/10810/4118/443/4099/26011/429/8506/56978
GO:1902656	BP	calcium ion import into cytosol	30	0.624493	1.39824	0.0030554	0.0319868	0.0262252	5658	tags=80%, list=30%, signal=56%	774/27112/931/6547/6543/799/5023/781/779/773/162514/777/728215/775/123041/25769/6546/10268/55503/59341/493/7442/2534/778
GO:0071868	BP	cellular response to monoamine stimulus	104	0.526842	1.25071	0.00308935	0.0321462	0.0263559	6492	tags=59%, list=34%, signal=39%	9370/111/5731/5064/50632/1129/51617/2775/3358/1813/3359/1133/3356/6622/238/5313/3351/3360/170572/120892/9177/1132/390441/1816/285242/85397/2774/1812/333/3363/2781/3354/1131/5999/858/6262/5071/2316/3357/3355/10681/27065/8013/3362/493/3274/1128/3361/3350/284433/1815/11255/219874/200909/390442/26539/1814/5142/54331/59340/3352
GO:0071870	BP	cellular response to catecholamine stimulus	104	0.526842	1.25071	0.00308935	0.0321462	0.0263559	6492	tags=59%, list=34%, signal=39%	9370/111/5731/5064/50632/1129/51617/2775/3358/1813/3359/1133/3356/6622/238/5313/3351/3360/170572/120892/9177/1132/390441/1816/285242/85397/2774/1812/333/3363/2781/3354/1131/5999/858/6262/5071/2316/3357/3355/10681/27065/8013/3362/493/3274/1128/3361/3350/284433/1815/11255/219874/200909/390442/26539/1814/5142/54331/59340/3352
GO:0009953	BP	dorsal/ventral pattern formation	90	0.529733	1.2494	0.00308935	0.0321462	0.0263559	4325	tags=42%, list=23%, signal=33%	64388/64399/6422/7476/57453/6496/7092/9241/121643/658/2735/25928/8646/145258/6608/25806/79659/429/26585/2019/3199/80319/3212/2736/2290/344022/2737/58524/4010/120237/7093/57057/5992/3237/5626/5567/170825/6469
GO:0009308	BP	amine metabolic process	118	0.521045	1.24203	0.00308935	0.0321462	0.0263559	6185	tags=50%, list=33%, signal=34%	2903/9971/5053/26002/1610/4852/9627/635/11185/130013/9464/1813/3067/85300/2861/9365/285671/4129/6622/1543/222962/8639/5153/29958/1141/4881/3642/6581/6531/1812/438/7200/6870/7042/6819/5071/6799/4837/5409/6620/1909/7412/113451/493/169355/2034/8942/3684/79153/1621/23409/3350/1815/2625/196743/18/8564/1814/9056
GO:0061437	BP	renal system vasculature development	28	0.641048	1.42989	0.00309553	0.0321462	0.0263559	5279	tags=75%, list=28%, signal=54%	80310/5156/130497/6943/284/59/2303/7010/655/8710/5311/7490/1909/5175/3570/1958/4854/947/4853/5159/8829
GO:0061440	BP	kidney vasculature development	28	0.641048	1.42989	0.00309553	0.0321462	0.0263559	5279	tags=75%, list=28%, signal=54%	80310/5156/130497/6943/284/59/2303/7010/655/8710/5311/7490/1909/5175/3570/1958/4854/947/4853/5159/8829
GO:1901838	BP	positive regulation of transcription of nucleolar large rRNA by RNA polymerase I	10	-0.58917	-1.8063	0.00312063	0.0323362	0.0265116	7795	tags=100%, list=41%, signal=59%	55011/11137/64768/6598/4141/1663/25926/6597/4691
GO:0031279	BP	regulation of cyclase activity	76	0.555671	1.30248	0.00312634	0.0323362	0.0265116	4838	tags=54%, list=26%, signal=40%	2740/7434/4842/4883/84059/116/10886/5064/155/2913/554/1813/2587/2917/2981/53836/154/9568/1394/5957/49/343035/1910/1816/1812/2692/10486/796/59350/2492/7253/122042/775/3973/2550/729230/1909/2696/4846/153/5997
GO:0035270	BP	endocrine system development	126	0.516418	1.23269	0.00312634	0.0323362	0.0265116	5628	tags=48%, list=30%, signal=34%	3175/335/8854/2255/6496/222546/1545/2695/9241/2735/1813/5308/6608/1000/2304/4760/2247/429/654/653/5156/5122/54361/50674/2736/3642/6531/1028/2692/3670/6657/1081/3232/5087/5626/7038/6899/3202/9480/6299/7490/3625/1909/7481/190/6469/3213/9247/2624/3570/2696/2516/1392/5454/5909/23440/650/27122/1906/3200
GO:0017080	MF	sodium channel regulator activity	38	0.610713	1.38425	0.00316334	0.0326414	0.0267619	4566	tags=50%, list=24%, signal=38%	6327/486/4842/6330/55800/5348/2259/2257/53826/2258/53822/2822/53828/10110/6640/360226/6324/859/493
GO:0044305	CC	calyx of Held	18	0.699591	1.49482	0.00316428	0.0326414	0.0267619	3569	tags=56%, list=19%, signal=45%	440279/3776/3736/3746/3737/3351/3738/5579/5582/10814
GO:0043113	BP	receptor clustering	56	0.583466	1.3507	0.00320034	0.0329257	0.026995	4701	tags=46%, list=25%, signal=35%	22871/5649/4593/22865/9378/2743/9379/2901/2898/1000/388336/8174/1740/9863/375323/51201/5764/8292/57555/1742/8326/2316/729956/85358/2934/57554
GO:0048640	BP	negative regulation of developmental growth	104	0.5265	1.2499	0.00320034	0.0329257	0.026995	6578	tags=57%, list=35%, signal=37%	9723/223117/2045/221476/5950/23105/3776/7143/9241/6910/4099/1630/4133/154/9423/2258/9856/57556/56920/344901/10500/23111/58529/6532/6585/5802/54437/5999/1081/7093/8482/80128/2261/10371/859/80014/153/80031/5997/2660/5727/10501/9706/8829/54910/7048/5600/51316/64218/10512/393/7474/85407/89780/55841/8408/10505/374946/51265
GO:0072202	BP	cell differentiation involved in metanephros development	24	0.660068	1.45026	0.00321318	0.0330139	0.0270673	3284	tags=54%, list=17%, signal=45%	9370/10736/7484/6608/5455/26585/54361/130497/25937/6943/5076/2668/7827
GO:0036499	BP	PERK-mediated unfolded protein response	18	-0.441364	-1.97089	0.00321967	0.0330349	0.0270845	10599	tags=100%, list=56%, signal=44%	5770/23645/9451/8440/4690/5771/1649/54870/10347/4780/84919/468/10959/3309/1965/10551/55161
GO:0035145	CC	exon-exon junction complex	10	-0.586848	-1.79918	0.00322379	0.0330349	0.0270845	7839	tags=100%, list=41%, signal=59%	22794/5976/26019/65110/4116/55110/9775/84305/65109
GO:0033689	BP	negative regulation of osteoblast proliferation	10	0.771221	1.53194	0.00322801	0.0330349	0.0270845	1602	tags=50%, list=8%, signal=46%	6422/63923/4745/4330/26585
GO:0072498	BP	embryonic skeletal joint development	15	0.719924	1.50784	0.00325894	0.0333074	0.027308	4092	tags=67%, list=22%, signal=52%	9241/1280/7483/130497/3373/6474/3227/655/81031/3549
GO:0044853	CC	plasma membrane raft	113	0.52261	1.24371	0.00327434	0.0333662	0.0273561	5547	tags=49%, list=29%, signal=35%	5740/477/931/729085/117/119/6331/4118/8436/5348/6608/148/1000/1946/3778/3356/11149/120892/3751/1378/57126/1141/948/9472/6531/10580/30846/3741/147719/147/23209/7035/1013/1136/9356/858/7223/284119/857/112464/5657/114/859/10395/8611/493/6401/2149/4846/5727/5743/3684/3991/7048/1139
GO:0043010	BP	camera-type eye development	329	0.47183	1.15749	0.00327434	0.0333662	0.0273561	5796	tags=43%, list=31%, signal=31%	8854/7275/7476/2255/4081/57110/6496/5950/362/1641/57030/1545/84189/246213/6096/2823/2202/1735/54549/491/91156/56853/121643/658/7111/11081/4693/23363/10218/1826/7483/4915/7484/1813/5308/146862/25806/4760/2247/7068/1543/5979/5961/5156/155051/343035/51761/10586/1296/2295/1295/43/7021/5158/220/6121/11023/1410/7477/57545/5176/5076/23418/6531/8419/1028/2916/2737/196740/348980/55714/57010/7101/94233/660…
GO:0044298	CC	cell body membrane	31	0.636082	1.42518	0.00327761	0.0333662	0.0273561	4676	tags=71%, list=25%, signal=54%	3745/933/491/482/9312/2558/3746/3737/3751/6530/64805/6531/85397/1524/6870/57463/3748/3747/478/114/90249/23769
GO:0022839	MF	ion gated channel activity	44	0.60312	1.37806	0.00331133	0.0336652	0.0276013	4832	tags=57%, list=25%, signal=42%	203859/63982/343450/1179/3778/80036/57156/3780/121601/56923/10242/57348/27094/3779/9635/117144/3782/378807/94015/50636/57582/57101/27345/150160/255022
GO:0046887	BP	positive regulation of hormone secretion	119	0.523804	1.24886	0.00334833	0.0339968	0.0278731	4007	tags=38%, list=21%, signal=30%	640/2850/169026/6869/9971/3623/222546/5950/116/2266/846/2695/1813/2587/2922/25924/2645/2852/114131/654/8431/2243/6343/3952/114899/2822/388581/2244/2641/2692/668/7200/3670/57555/8938/6690/8447/5028/51738/51083/1908/2864/1588/2550/114
GO:0034770	BP	histone H4-K20 methylation	12	-0.503457	-1.69164	0.00336993	0.0341712	0.0280162	9420	tags=100%, list=50%, signal=50%	5926/51111/54093/84787/64324/10322/387893/11137/57673/672/7468
GO:0001894	BP	tissue homeostasis	268	0.477635	1.16594	0.00338533	0.0342825	0.0281074	7161	tags=53%, list=38%, signal=33%	7018/7032/340547/1311/4588/4057/7275/213/6441/12/84059/5950/7031/6456/65217/64072/482/5745/1280/5166/51208/9455/10804/1258/6608/124590/387597/24/58494/4760/3908/3512/154/3848/1756/9607/145226/338773/2651/6833/9153/65267/7122/6121/25937/4054/284/645811/23418/83700/63978/196740/2623/158046/796/340719/7287/10000/1901/9079/8029/317719/728378/8842/94137/216/54360/3915/4982/2103/1490/3549/729230/7399/1…
GO:1990498	CC	mitotic spindle microtubule	13	-0.493771	-1.75818	0.00341111	0.0344985	0.0282845	9604	tags=54%, list=51%, signal=27%	54930/3192/55559/7283/93323/54801/115106
GO:0043268	BP	positive regulation of potassium ion transport	49	0.58378	1.34295	0.00342233	0.0345668	0.0283405	4749	tags=55%, list=25%, signal=41%	486/287/88/3736/482/6000/2273/150/4986/219527/3746/6833/65267/9472/1812/3779/3757/126755/57463/51083/3747/2316/1908/144245/23630/30819/4878
GO:1902710	CC	GABA receptor complex	21	0.684266	1.4839	0.00343951	0.0346951	0.0284457	5409	tags=90%, list=29%, signal=65%	2567/2569/2566/2556/2561/2558/55879/9568/2554/2568/2562/2564/2565/2550/200959/2559/2570/2555/2560
GO:0019838	MF	growth factor binding	138	0.51137	1.22377	0.00345932	0.0348497	0.0285724	5831	tags=53%, list=31%, signal=37%	4804/4916/2045/124857/23105/8839/6331/347252/2690/3977/1280/4915/4856/4036/2322/9365/5156/3483/4914/199713/4054/2046/3488/2260/3489/948/3484/4052/4053/9001/3554/2692/2/8838/8425/114990/135228/3491/2615/3485/85409/9180/7057/2261/10563/27286/1490/3487/3490/152831/94031/7049/3570/7043/3690/3486/8828/5159/2817/83888/8829/3590/2324/375387/1281/7048/2022/100507588/3572/3587/5654/57045/2263
GO:1901016	BP	regulation of potassium ion transmembrane transporter activity	58	0.568804	1.31894	0.00349632	0.0351766	0.0288405	4749	tags=48%, list=25%, signal=36%	3787/486/3755/845/287/88/3736/482/3788/2273/219527/3746/9992/6833/9472/126755/57463/23704/51083/857/3747/144245/7881/859/81832/23630/30819/4878
GO:0060191	BP	regulation of lipase activity	88	0.529346	1.24704	0.00353332	0.0354568	0.0290702	5931	tags=55%, list=31%, signal=38%	335/337/185/117/345/3815/148/338328/183/2247/3356/6622/350/5156/1902/2099/5322/440503/553/2260/64805/728113/653145/5319/10316/9734/395/552/3491/22925/5406/2261/3357/115727/4035/1909/9290/116519/6401/8698/5997/5159/51129/3702/7294/27329/2263/5330
GO:0042472	BP	inner ear morphogenesis	103	0.519718	1.23265	0.00353332	0.0354568	0.0290702	6293	tags=55%, list=33%, signal=37%	3249/53904/2255/7545/84189/64072/8516/1750/1280/4920/9096/124590/525/1749/259236/9423/51761/3167/220/222662/51168/2138/2254/5076/2290/55084/3198/7471/2487/6935/340784/79955/140469/9132/6899/161497/2535/5396/2624/51804/6909/25861/80736/55584/497189/4647/2625/2263/115908/7401/2299/5459/51057/125488/7474/89780/5456
GO:0048469	BP	cell maturation	182	0.492272	1.19077	0.00357032	0.0357817	0.0293366	5868	tags=46%, list=31%, signal=32%	4653/1811/6496/6366/6363/6900/2266/5241/4880/6954/163589/577/440712/5745/51412/1672/84530/54738/126668/257062/718/56165/26256/429/5979/25893/646/120892/5139/2046/152015/1910/29842/10882/8419/342035/1028/64100/57731/2692/59277/163175/6886/83853/30813/6690/26468/8399/1235/30812/494551/2069/342618/378807/558/3549/3202/100131137/9389/1909/257044/231/695/56975/84456/4882/2624/30819/2038/10365/2034/269…
GO:1990062	CC	RPAP3/R2TP/prefoldin-like complex	11	-0.564657	-1.7363	0.00358165	0.0358489	0.0293916	8260	tags=100%, list=44%, signal=56%	116143/55011/8607/10471/10856/5202/79657/5434/81572/8409
GO:0016712	MF	oxidoreductase activity, acting on paired donors, with incorporation or reduction of molecular oxygen, reduced flavin or flavoprotein as one donor, and incorporation of one atom of oxygen	39	0.608887	1.38126	0.00360732	0.0359201	0.0294501	4169	tags=56%, list=22%, signal=44%	1545/1559/1580/1557/54905/1579/1543/1548/9420/1555/1553/1558/1549/113612/11283/1544/64816/1581/1562/1588/1572/1571
GO:0060632	BP	regulation of microtubule-based movement	53	0.589214	1.36075	0.00360732	0.0359201	0.0294501	3992	tags=47%, list=21%, signal=37%	6869/50632/9104/92749/55130/1672/4133/4744/25893/79645/9638/63978/9001/8701/154313/57119/6870/117144/246176/123872/6865/80128/255061/1235/345895
GO:0140359	MF	ABC-type transporter activity	49	0.582267	1.33947	0.00360732	0.0359201	0.0294501	5939	tags=55%, list=31%, signal=38%	10351/10350/340273/23460/154664/64241/24/10349/94160/10060/6833/5244/8647/64137/5243/225/64240/21/9429/26154/368/85320/9619/1244/19/10057/23457
GO:0008202	BP	steroid metabolic process	314	0.471443	1.1551	0.00360732	0.0359201	0.0294501	5896	tags=40%, list=31%, signal=28%	5563/335/337/338/185/3158/9971/1583/33/5444/1066/2638/8435/1586/1545/10720/866/1559/9023/1646/1582/174/25830/6338/3815/27120/4036/2538/183/29881/1589/570/1557/1591/10858/654/8431/1543/1548/653/5156/9965/6718/54361/114880/9420/2099/3952/54658/1910/3953/8630/50846/1555/7366/9486/54577/7436/3990/8647/7363/1558/8912/10826/8856/6770/441282/1544/340665/8029/64816/100288072/1581/64137/319/1645/3294/1081…
GO:0042762	BP	regulation of sulfur metabolic process	10	0.768594	1.52673	0.0036146	0.0359464	0.0294716	1457	tags=30%, list=8%, signal=28%	635/5166/6622
GO:0010976	BP	positive regulation of neuron projection development	144	0.504075	1.20934	0.00364431	0.0361955	0.0296758	4035	tags=36%, list=21%, signal=29%	1268/5649/11075/4916/1272/79625/5063/158866/10690/257194/482/816/23316/4915/4920/29993/183/389658/5979/1809/238/5587/9863/653/2042/51761/4914/5365/1996/163404/5176/9638/7436/3082/65009/55714/2281/154288/5764/285016/4919/655/9760/57463/1627/126520/6324/2316/4058/91752/2242/27185
GO:0019199	MF	transmembrane receptor protein kinase activity	79	0.54016	1.26774	0.00368131	0.0365162	0.0299387	5620	tags=57%, list=30%, signal=40%	4593/4916/2066/2045/285220/2202/269/658/25928/4915/3815/4920/2322/6098/5157/1949/5979/238/5156/2042/4914/2046/2260/2051/4921/4052/2043/7010/2044/8425/3645/2261/4058/148738/558/7075/7049/8828/5159/10461/8829/2324/7048/2022/100507588
GO:0043195	CC	terminal bouton	48	0.584173	1.34183	0.00371831	0.0367889	0.0301624	3644	tags=44%, list=19%, signal=35%	440279/10590/63923/6572/4852/2901/2899/2898/4915/5020/120892/6570/8492/57010/796/6571/794/23025/10814/3747/4923
GO:0048565	BP	digestive tract development	123	0.513467	1.22501	0.00371831	0.0367889	0.0301624	4815	tags=44%, list=25%, signal=33%	887/6422/6425/8854/3158/2255/6423/93649/4852/10736/2735/140628/348093/51208/3815/6608/2304/429/1543/5979/5156/5915/2295/6343/79827/5697/1910/6943/2736/2254/60529/83881/2737/2294/6474/7042/8642/5021/4838/8626/123872/56034/51339/3549/3202/6299/7481/6469/64321/5919/3239/7043/6909/2300
GO:0032809	CC	neuronal cell body membrane	28	0.637292	1.42152	0.00372575	0.0368108	0.0301803	4676	tags=71%, list=25%, signal=54%	3745/933/491/9312/2558/3746/3737/3751/6530/6531/85397/1524/6870/57463/3748/3747/478/114/90249/23769
GO:0090660	BP	cerebrospinal fluid circulation	13	0.741634	1.52563	0.00373002	0.0368108	0.0301803	1633	tags=62%, list=9%, signal=56%	200373/361/83538/79864/144535/1770/164781/79582
GO:0098930	BP	axonal transport	64	0.557441	1.29719	0.00375531	0.0369192	0.0302692	2630	tags=25%, list=14%, signal=22%	547/8120/84871/4747/50632/7345/3798/4137/4133/1740/84709/66000/4130/9638/3800/9001
GO:0042471	BP	ear morphogenesis	122	0.513262	1.22451	0.00375531	0.0369192	0.0302692	6293	tags=53%, list=33%, signal=36%	3249/53904/2255/7545/84189/64072/8516/9241/1750/10736/1280/10804/4920/145258/9096/124590/525/1749/259236/9423/51761/130497/3167/220/222662/3199/51168/2138/2254/5076/2290/55084/3198/7471/2487/6935/340784/79955/140469/9132/6899/161497/2535/1909/5396/2624/51804/6909/25861/80736/55584/1906/497189/4647/2625/2263/115908/7401/2299/5459/51057/125488/7474/89780/5456
GO:0007519	BP	skeletal muscle tissue development	154	0.499885	1.20208	0.00375531	0.0369192	0.0302692	4913	tags=44%, list=26%, signal=32%	1310/4223/6258/2006/93649/6261/5079/22953/844/64208/54715/6608/92737/221662/51676/11149/1756/4868/51778/8929/341405/89/11023/3481/6943/8506/58529/3236/9148/150572/9734/3131/6474/63950/9750/3679/668/10324/27063/4208/26508/858/8320/64091/7093/857/26576/30812/7480/1144/1959/6899/4656/245806/6469/1073/6840/3792/58/9242/7026/1958/51804/56203/29895/3235/2660
GO:0007596	BP	blood coagulation	221	0.487231	1.18435	0.00382967	0.037555	0.0307904	6526	tags=51%, list=34%, signal=34%	640/1311/1511/7448/2192/22915/7980/6403/2266/5624/2147/170692/150/1607/2160/5340/2153/3827/5023/139189/3848/350/2162/5156/1608/2243/2814/2159/51156/6484/10398/2155/6521/64805/5270/948/653145/2244/9162/2623/2165/152/51206/462/7035/10077/5196/3273/5592/5627/2815/63036/4352/3053/9002/710/5345/5028/80274/340205/375033/857/2316/5294/1361/7057/5054/2157/959/7056/558/7450/2811/5327/725/151/239/6469/5055…
GO:2000146	BP	negative regulation of cell motility	280	0.472597	1.15498	0.00382967	0.037555	0.0307904	7121	tags=51%, list=38%, signal=32%	347/9370/11122/4804/6422/23671/6366/2192/63923/340533/4223/9353/149461/127435/1545/10718/9241/6423/9104/93649/482/575/6910/1813/3036/8646/4856/50859/26228/2247/5217/89795/350/1809/26585/9863/653/25817/54361/1634/6833/51378/5365/7122/90102/54328/8434/3488/80199/89927/4163/5176/65009/2043/3084/3204/1524/9750/57119/6387/3273/5797/5592/10076/126820/753/186/4208/79812/4838/57152/11117/1843/6091/7057/2…
GO:0043653	BP	mitochondrial fragmentation involved in apoptotic process	10	0.765018	1.51962	0.00384655	0.0376482	0.0308668	230	tags=20%, list=1%, signal=20%	4884/2066
GO:0044241	BP	lipid digestion	21	0.679627	1.47384	0.00384889	0.0376482	0.0308668	3969	tags=62%, list=21%, signal=49%	335/337/8435/1582/64241/29881/5408/3952/948/339221/1645/5406/64240
GO:0002182	BP	cytoplasmic translational elongation	12	-0.49876	-1.67585	0.00386533	0.0377613	0.0309596	9509	tags=100%, list=50%, signal=50%	120526/285381/1801/132864/89978/9147/1802/51611/92715/6181/16
GO:0099068	BP	postsynapse assembly	29	0.640113	1.4295	0.00391184	0.0381676	0.0312927	4684	tags=66%, list=25%, signal=49%	22871/4884/4916/22865/7476/9378/2596/9379/57502/1000/5789/94030/2895/54413/869/57555/26045/85358/84628
GO:0007000	BP	nucleolus organization	15	-0.468483	-1.77903	0.00395218	0.0385127	0.0315756	10084	tags=93%, list=53%, signal=44%	57602/23411/11176/5253/23378/10436/23133/54700/57673/1663/84172/6223/9221/6839
GO:0072163	BP	mesonephric epithelium development	95	0.535429	1.26556	0.00397839	0.0386621	0.0316982	5831	tags=56%, list=31%, signal=39%	80000/6422/9353/2719/9241/10736/2302/6092/7484/6608/183/2247/5979/26585/9244/5915/170690/54361/130497/168667/2138/6943/5076/2668/2737/7471/2303/7482/655/186/7475/8642/5087/30812/3237/6492/9500/5311/6299/7490/7481/6469/3911/2246/51804/5727/4070/650/10409/255743/2625/3975/2263
GO:0072164	BP	mesonephric tubule development	95	0.535429	1.26556	0.00397839	0.0386621	0.0316982	5831	tags=56%, list=31%, signal=39%	80000/6422/9353/2719/9241/10736/2302/6092/7484/6608/183/2247/5979/26585/9244/5915/170690/54361/130497/168667/2138/6943/5076/2668/2737/7471/2303/7482/655/186/7475/8642/5087/30812/3237/6492/9500/5311/6299/7490/7481/6469/3911/2246/51804/5727/4070/650/10409/255743/2625/3975/2263
GO:0035116	BP	embryonic hindlimb morphogenesis	28	0.635726	1.41802	0.00398635	0.0386621	0.0316982	3484	tags=39%, list=18%, signal=32%	7476/3899/7704/340419/2719/5915/130497/9496/60529/8626/257
GO:0035518	BP	histone H2A monoubiquitination	17	-0.434583	-1.8458	0.00398749	0.0386621	0.0316982	10727	tags=100%, list=57%, signal=43%	6045/7703/648/4591/165918/23429/8450/10336/6500/1642/84678/84333/54880/84759/84108/1643
GO:0034381	BP	plasma lipoprotein particle clearance	40	0.602989	1.3689	0.00405275	0.0391479	0.0320964	2544	tags=30%, list=13%, signal=26%	335/338/9370/9971/345/8435/338328/6833/948/2822/7436/3990
GO:0042698	BP	ovulation cycle	70	0.555209	1.29875	0.00405275	0.0391479	0.0320964	4913	tags=53%, list=26%, signal=39%	2662/9353/5241/1545/658/174/6092/4986/4889/4988/6586/5156/2099/4808/3952/5176/2/9510/4313/2492/7042/5764/5021/5798/3973/5806/4987/2069/558/8322/7079/4327/1958/7043/4846/2516/2660
GO:0006022	BP	aminoglycan metabolic process	131	0.507351	1.21159	0.00405275	0.0391479	0.0320964	5899	tags=47%, list=31%, signal=32%	83539/79625/3699/222537/60495/192134/90161/1950/64579/347365/3697/23553/3036/3698/80760/50859/2247/10090/166012/1634/2651/114770/89792/92126/6484/1910/284/3373/1117/64711/3700/10894/9806/9348/114771/9469/6487/1909/254773/10402/93010/56548/9435/337876/9956/133584/5159/633/6482/84752/27159/29940/57115/113189/4166/9955/7040/55790/51363/10057/9953
GO:0021536	BP	diencephalon development	73	0.54433	1.27486	0.00412711	0.039767	0.032604	7065	tags=66%, list=37%, signal=41%	8854/2255/79625/6496/9241/139411/2735/1813/5308/6608/2247/3746/5122/54361/4808/1141/2736/6531/9001/2692/7471/3670/6657/6716/3747/10371/5457/5626/6299/3625/190/6469/2624/5454/8828/6887/8829/23440/650/2691/7474/5449/219409/6658/9095/30062/27023/10215
GO:0072341	MF	modified amino acid binding	90	0.525122	1.23853	0.00412711	0.039767	0.032604	4017	tags=37%, list=21%, signal=29%	2348/26762/10841/2596/6860/84258/341359/6861/8436/143425/57158/575/6857/4139/9362/6121/2352/51760/148281/2946/91683/83849/23208/875/493829/2947/6247/2350/7057/85477/113235/4935/558
GO:0006983	BP	ER overload response	12	-0.493903	-1.65954	0.00414902	0.0399285	0.0327364	9601	tags=100%, list=51%, signal=49%	54499/10018/55829/1649/7466/83734/84919/2932/57003/3309/7157
GO:0005890	CC	sodium:potassium-exchanging ATPase complex	12	0.74431	1.51449	0.00418227	0.0401985	0.0329578	3793	tags=67%, list=20%, signal=53%	477/486/482/480/5348/53828/496/478
GO:1903350	BP	response to dopamine	91	0.533702	1.25969	0.00420147	0.0402831	0.0330272	6492	tags=58%, list=34%, signal=38%	111/5731/5064/50632/1129/51617/2775/3358/1813/3359/1133/3356/238/3351/3360/170572/120892/9177/1132/390441/1816/285242/85397/2774/1812/3363/2781/3354/1131/5999/858/5071/2316/3357/3355/10681/27065/3362/3274/1128/3361/3350/284433/1815/11255/219874/200909/390442/26539/1814/54331/59340/3352
GO:0007548	BP	sex differentiation	277	0.472566	1.15459	0.00420147	0.0402831	0.0330272	6300	tags=43%, list=33%, signal=29%	2674/64478/63951/80000/6422/7476/2255/117/3623/5950/9468/367/1586/9353/5241/117154/1271/1545/269/6423/658/174/23414/6092/8999/132625/7484/3815/4920/4036/654/653/6586/5156/54361/130497/4914/1761/2295/56956/2099/431707/11086/10655/4808/3952/63946/6943/2254/50846/56159/2623/2/9510/58524/10468/6665/4313/63950/668/2492/7042/7482/10388/317719/122042/5798/8626/7022/6716/5087/3973/5806/30812/8747/10046/2…
GO:0030539	BP	male genitalia development	24	0.655557	1.44035	0.00421832	0.0403948	0.0331187	4532	tags=62%, list=24%, signal=48%	80000/2255/367/7484/4920/654/653/5156/10388/317719/6716/3973/7490/6469/3239
GO:0050919	BP	negative chemotaxis	47	0.589433	1.35273	0.00427583	0.0408444	0.0334874	5819	tags=66%, list=31%, signal=46%	335/9723/223117/2045/9353/10718/23768/6092/91584/1946/6586/9423/8633/57556/56920/10500/3084/6585/54437/654429/8482/6091/10371/57408/3690/80031/8828/10501/54910/64218/10512
GO:0098739	BP	import across plasma membrane	181	0.492828	1.19185	0.00427583	0.0408444	0.0334874	5720	tags=48%, list=30%, signal=33%	2348/774/27112/6564/477/10021/486/389015/84889/6547/3773/6542/6543/482/799/480/6338/6340/4036/183/1261/6506/5023/479/781/6559/779/6540/9992/3768/3763/10060/65267/6511/6567/2670/773/6557/948/162514/777/3757/285195/6569/120103/2911/54716/495/6565/5999/728215/51305/81031/775/123041/25769/2350/496/4923/7057/478/6546/113235/285335/610/9152/284525/3764/10268/55503/59272/59341/493/5997/84230/3765/7442/6…
GO:1903539	BP	protein localization to postsynaptic membrane	35	0.614745	1.38722	0.00435019	0.0415036	0.0340278	4586	tags=43%, list=24%, signal=33%	4884/9211/2903/6616/5913/23426/10082/59284/51201/160622/1742/80852/27065/10368/10369
GO:0030299	BP	intestinal cholesterol absorption	18	0.690587	1.47559	0.00440297	0.0419555	0.0343983	4673	tags=72%, list=25%, signal=54%	335/337/8435/1582/64241/29881/3952/948/339221/1645/5406/64240/116519
GO:0007616	BP	long-term memory	35	0.614373	1.38638	0.00442455	0.0420576	0.0344821	2889	tags=43%, list=15%, signal=36%	5649/6869/139411/1813/4909/266743/23237/2890/50944/9486/107/164312/4776/6517/814
GO:0005109	MF	frizzled binding	38	0.604904	1.37108	0.00442455	0.0420576	0.0344821	4301	tags=53%, list=23%, signal=41%	6422/7476/4653/4693/84870/7483/7484/4920/54361/7477/7471/51384/7482/7475/80326/1742/7478/7480/8324/7481
GO:0014032	BP	neural crest cell development	83	0.533302	1.25315	0.00449891	0.0425037	0.0348478	5895	tags=52%, list=31%, signal=36%	2348/9723/223117/8854/2066/55698/9464/5308/6608/1000/5979/9965/8929/1910/57556/56920/8092/2668/10500/3084/54437/2303/340665/3670/655/8482/1908/30812/3357/10371/6899/1909/6469/3911/80031/8828/10501/8829/54910/1906/64218/10512/2335
GO:0098659	BP	inorganic cation import across plasma membrane	111	0.522162	1.24187	0.00449891	0.0425037	0.0348478	6861	tags=62%, list=36%, signal=40%	774/27112/477/10021/486/389015/6547/3773/6543/482/799/480/6338/6340/1261/5023/479/781/6559/779/9992/3768/3763/10060/65267/773/6557/162514/777/3757/285195/6569/495/728215/51305/775/123041/25769/496/478/6546/285335/610/284525/3764/10268/55503/59341/493/3765/7442/6339/2534/6560/3769/778/6549/3761/3758/283375/6524/100134444/57468/5621/221074/51393/3762/3760/3772
GO:0099587	BP	inorganic ion import across plasma membrane	111	0.522162	1.24187	0.00449891	0.0425037	0.0348478	6861	tags=62%, list=36%, signal=40%	774/27112/477/10021/486/389015/6547/3773/6543/482/799/480/6338/6340/1261/5023/479/781/6559/779/9992/3768/3763/10060/65267/773/6557/162514/777/3757/285195/6569/495/728215/51305/775/123041/25769/496/478/6546/285335/610/284525/3764/10268/55503/59341/493/3765/7442/6339/2534/6560/3769/778/6549/3761/3758/283375/6524/100134444/57468/5621/221074/51393/3762/3760/3772
GO:0020037	MF	heme binding	135	0.509195	1.21754	0.00449891	0.0425037	0.0348478	5033	tags=43%, list=27%, signal=32%	5740/1583/4842/1586/1545/79400/1559/1582/7173/79689/339761/1580/1589/1557/1591/54905/10858/1579/1543/79747/1548/259/9420/4025/4353/1555/58157/1553/50506/1558/1549/113612/11283/2982/1544/3273/340665/64816/1581/875/2977/53905/3048/1562/137902/1588/1592/1572/2983/1571/5742/114757/284541/3046/4846/169355/50507/5743
GO:0031253	CC	cell projection membrane	338	0.467907	1.14845	0.00449891	0.0425037	0.0348478	7356	tags=53%, list=39%, signal=33%	55600/2348/64399/3745/2567/1811/192668/10568/84059/2566/2596/2556/5064/729993/50617/8516/491/482/11136/6092/24141/1813/50649/361/1258/9154/6608/29993/11170/79901/388336/4036/440829/2852/2558/6506/5152/340024/3746/8910/4137/132884/6519/2890/11149/4985/4988/140803/1756/2121/3737/54587/168507/10235/9153/5158/660/83543/3000/2554/4355/64805/54825/948/1816/10979/762/1812/65009/4547/57348/6753/768206/65…
GO:0051284	BP	positive regulation of sequestering of calcium ion	14	0.732121	1.52219	0.00451475	0.0426015	0.0349279	4148	tags=57%, list=22%, signal=45%	845/10345/2946/2281/6262/4923/1193/5311
GO:0035137	BP	hindlimb morphogenesis	35	0.612934	1.38314	0.00457327	0.0429965	0.0352518	4919	tags=49%, list=26%, signal=36%	7476/3899/7704/340419/2719/5915/130497/9496/7021/8200/60529/3236/8626/257/6469/3235/5727
GO:0072210	BP	metanephric nephron development	40	0.60018	1.36252	0.00457327	0.0429965	0.0352518	5793	tags=62%, list=31%, signal=43%	9370/10736/7484/6608/5979/26585/5156/54361/130497/7021/6943/5076/2668/79192/186/7827/30812/5311/6299/7490/1958/947/5159/3913/3975
GO:0014033	BP	neural crest cell differentiation	95	0.533383	1.26072	0.00457327	0.0429965	0.0352518	5895	tags=52%, list=31%, signal=36%	2348/9723/223117/6422/8854/2066/55698/9464/5308/145258/6608/1000/5979/9965/8929/1910/57556/56920/8092/2668/10500/3084/2487/54437/2303/340665/3670/655/4208/80326/8482/1908/7478/30812/3357/10371/6899/1909/6469/3911/80031/8828/10501/8829/54910/1906/64218/10512/2335
GO:0005003	MF	ephrin receptor activity	19	0.68247	1.46922	0.00461011	0.0432904	0.0354927	3167	tags=53%, list=17%, signal=44%	4916/2045/285220/1949/2042/4914/2046/2051/2043/2044
GO:0097107	BP	postsynaptic density assembly	17	0.699053	1.48134	0.00464284	0.0433797	0.035566	4395	tags=71%, list=23%, signal=54%	4884/4916/22865/9378/9379/5789/94030/2895/869/57555/26045/85358
GO:0033523	BP	histone H2B ubiquitination	12	-0.486197	-1.63364	0.00464547	0.0433797	0.035566	9747	tags=100%, list=51%, signal=49%	9810/55100/7324/9646/51322/9025/1025/79577/56254/123169/151636
GO:0035107	BP	appendage morphogenesis	142	0.508661	1.21879	0.00464763	0.0433797	0.035566	6120	tags=47%, list=32%, signal=32%	22943/341640/8854/3226/7476/2255/3899/7704/340419/2719/494470/1382/9241/1750/6423/1280/80144/9464/6910/4920/79659/1749/57167/26585/2019/5915/130497/9496/7021/8434/8200/2254/60529/2737/3236/7700/6474/2201/7042/3227/655/8626/775/257/5087/344191/3549/6299/6469/5396/3239/6909/4853/3235/5727/2697/51176/3238/27152/1281/10512/2263/91461/4621/51057/5125/221833
GO:0035108	BP	limb morphogenesis	142	0.508661	1.21879	0.00464763	0.0433797	0.035566	6120	tags=47%, list=32%, signal=32%	22943/341640/8854/3226/7476/2255/3899/7704/340419/2719/494470/1382/9241/1750/6423/1280/80144/9464/6910/4920/79659/1749/57167/26585/2019/5915/130497/9496/7021/8434/8200/2254/60529/2737/3236/7700/6474/2201/7042/3227/655/8626/775/257/5087/344191/3549/6299/6469/5396/3239/6909/4853/3235/5727/2697/51176/3238/27152/1281/10512/2263/91461/4621/51057/5125/221833
GO:0005506	MF	iron ion binding	148	0.50228	1.2062	0.00464763	0.0433797	0.035566	4625	tags=37%, list=24%, signal=28%	7018/5740/4057/1583/316/1036/1586/5053/1545/392636/1559/9023/1582/339761/1580/1589/7166/1557/1591/54905/6622/10858/1579/1543/1548/9420/121278/1555/1553/80312/1558/10826/1549/5470/113612/11283/8424/1544/340665/10536/64816/1581/1562/246/1588/1592/1572/247/1571/55586/239/5352/114757/284541/283208
GO:0007157	BP	heterophilic cell-cell adhesion via plasma membrane cell adhesion molecules	51	0.581559	1.34133	0.00472199	0.0439151	0.0360049	5781	tags=65%, list=30%, signal=45%	57863/22871/10178/6403/83872/653499/1000/57451/26011/79633/5789/11141/23705/23418/2895/55714/91179/869/8642/57463/5673/5680/7369/7412/347902/84966/6401/120425/286204/5670/1002/3678/3683
GO:0002790	BP	peptide secretion	222	0.478749	1.16388	0.00472199	0.0439151	0.0360049	5883	tags=41%, list=31%, signal=29%	1268/27445/111/640/6422/3745/1113/2850/169026/9971/222546/5950/116/2266/7432/9699/846/2695/1363/6616/143425/3358/54097/1813/4856/2922/25924/150/2645/2852/387597/1946/4760/114131/1394/8431/9607/9024/2243/6833/7021/6343/1393/3952/6567/2822/3741/388581/2244/2641/2692/7200/2281/2044/63036/3670/57555/8938/6690/5798/8447/51738/51083/6865/5071/1908/2864/2550/114/3625/59341/8609/133308/2696/240/1392/9160…
GO:0051271	BP	negative regulation of cellular component movement	288	0.470519	1.15012	0.00472199	0.0439151	0.0360049	7121	tags=50%, list=38%, signal=32%	347/9370/11122/4804/6422/23671/6366/2192/63923/340533/5314/4223/9353/149461/127435/1545/10718/9241/6423/9104/93649/482/575/6910/1813/3036/8646/4856/50859/26228/2247/5217/89795/350/1809/26585/9863/653/25817/54361/1634/6833/51378/5365/7122/90102/54328/8434/3488/80199/89927/4163/5176/65009/2043/3084/3204/1524/9750/57119/6387/3273/5797/5592/10076/126820/753/186/4208/79812/4838/57152/11117/1843/6091/7…
GO:0030877	CC	beta-catenin destruction complex	11	-0.554418	-1.70481	0.00478732	0.0444692	0.0364593	8454	tags=100%, list=45%, signal=55%	6477/1452/2932/2931/56998/8312/10297/1499/27101/8313
GO:0030315	CC	T-tubule	51	0.58083	1.33965	0.00479635	0.0444998	0.0364843	4670	tags=55%, list=25%, signal=41%	477/27092/287/6331/59285/844/5348/361/148/6326/781/113146/779/6323/90342/9472/59284/786/6769/6517/783/775/6324/5962/6546/859/493/7043
GO:0072012	BP	glomerulus vasculature development	26	0.647672	1.43242	0.00481559	0.0446249	0.0365869	5036	tags=73%, list=27%, signal=54%	80310/5156/130497/6943/284/59/2303/7010/655/8710/7490/1909/5175/3570/1958/4854/947/4853/5159
GO:0004890	MF	GABA-A receptor activity	19	0.681027	1.46611	0.00483499	0.044671	0.0366247	5409	tags=89%, list=29%, signal=64%	2567/2569/2566/2556/2561/2558/55879/2554/2568/2562/2564/2565/200959/2559/2570/2555/2560
GO:1902711	CC	GABA-A receptor complex	19	0.681027	1.46611	0.00483499	0.044671	0.0366247	5409	tags=89%, list=29%, signal=64%	2567/2569/2566/2556/2561/2558/55879/2554/2568/2562/2564/2565/200959/2559/2570/2555/2560
GO:0000722	BP	telomere maintenance via recombination	15	-0.459983	-1.74675	0.00484364	0.044671	0.0366247	10245	tags=100%, list=54%, signal=46%	2072/7011/2067/10111/286053/5892/79677/7014/7517/23137/7515/51002/675/5888
GO:0030688	CC	preribosome, small subunit precursor	15	-0.459614	-1.74535	0.00484364	0.044671	0.0366247	10252	tags=47%, list=54%, signal=21%	79050/55781/161424/84946/8602/705/28987
GO:1902742	BP	apoptotic process involved in development	39	0.604538	1.37139	0.00487071	0.0448342	0.0367584	3461	tags=38%, list=18%, signal=32%	114786/6496/9353/6092/9464/343702/6586/1410/5076/2303/286046/7042/655/3491/389610
GO:0033270	CC	paranode region of axon	11	0.754781	1.52359	0.0048729	0.0448342	0.0367584	2823	tags=73%, list=15%, signal=62%	3736/400746/6326/4099/7122/8506/57731/57165
GO:0008227	MF	G protein-coupled amine receptor activity	49	0.57641	1.326	0.00494507	0.0454442	0.0372586	6605	tags=78%, list=35%, signal=51%	155/1129/3358/148/150/1133/3356/154/134864/3351/3360/146/1132/390441/3363/152/147/3354/1131/3357/3355/151/3362/153/3274/1128/3361/3350/284433/1815/11255/219874/390442/26539/9038/59340/3352/319100
GO:0030212	BP	hyaluronan metabolic process	29	0.635644	1.41952	0.00495497	0.0454812	0.037289	3230	tags=38%, list=17%, signal=32%	3699/1950/347365/3697/23553/3036/3698/80760/2247/3373/3700
GO:0019896	BP	axonal transport of mitochondrion	18	0.685773	1.4653	0.00500507	0.0458867	0.0376214	2630	tags=39%, list=14%, signal=34%	84871/4747/7345/4137/84709/9638/9001
GO:0010524	BP	positive regulation of calcium ion transport into cytosol	54	0.564003	1.3037	0.00501943	0.0459015	0.0376335	4725	tags=52%, list=25%, signal=39%	117/2147/10345/22953/799/844/57158/7220/2852/5023/6622/930/9472/1812/2946/5319/9001/9002/857/4923/7222/5311/187/10268/6375/387129/5026/2149
GO:0042886	BP	amide transport	282	0.475983	1.16303	0.00501943	0.0459015	0.0376335	5977	tags=42%, list=32%, signal=29%	1268/2348/27445/111/640/6422/3745/1113/2850/6564/169026/9971/222546/5950/116/2266/7432/89872/9699/846/2695/154664/1363/6616/143425/3358/54097/1813/4856/2922/25924/150/4036/2645/2852/387597/1946/4760/114131/1394/8431/9607/9024/7380/6563/2243/6833/7021/6343/2352/1393/3952/6567/64849/2822/3741/388581/4547/2244/2641/2692/5360/10332/7200/6565/2281/2044/364/63036/360/3670/57555/8938/6690/5798/8447/5173…
GO:0017147	MF	Wnt-protein binding	30	0.614974	1.37693	0.00502445	0.0459015	0.0376335	4966	tags=63%, list=26%, signal=47%	6422/6425/11197/6424/6423/4920/388630/8434/11211/2487/164284/4919/8326/8325/8324/2535/8322/79971/8321
GO:1990138	BP	neuron projection extension	170	0.493802	1.19163	0.00509379	0.0464254	0.0380631	6600	tags=52%, list=35%, signal=34%	9723/223117/22999/63923/9353/6456/6860/7143/84258/9699/9201/3897/57611/1826/8128/91584/6857/4099/4137/4133/6586/9423/4692/9362/10439/66000/9856/57556/56920/344901/51760/59284/10500/54413/6585/5802/54437/4131/6387/7852/1627/23025/8482/7224/80128/5071/1908/10371/27185/1909/9576/23769/57699/80031/343472/6792/8828/10501/4897/9706/8829/26999/151835/8936/54910/3913/1906/1002/127833/64218/51299/3676/105…
GO:0045178	CC	basal part of cell	266	0.473137	1.15469	0.00509379	0.0464254	0.0380631	6832	tags=51%, list=36%, signal=33%	7018/10351/2348/340547/5010/146894/2066/362/287/200504/5064/389015/149461/353189/89872/3773/196500/114571/846/6543/491/5745/115111/361/338328/1000/150/359/123264/525/479/1740/6540/222962/23705/57127/6563/10991/8671/4025/10864/53919/90102/6521/375611/3953/9376/64849/10599/65009/51458/4547/3680/6554/55811/23209/9635/9381/7010/912/1131/7253/364/360/9356/7223/5028/9963/3248/8825/57282/3747/387700/854…
GO:0001964	BP	startle response	24	0.651683	1.43184	0.00511423	0.0465569	0.0381709	4944	tags=67%, list=26%, signal=49%	64478/2903/5179/84189/3736/2743/1813/6531/2895/1812/1496/5071/2741/23621/135/4861
GO:0044291	CC	cell-cell contact zone	71	0.5467	1.27923	0.00516815	0.0468825	0.0384379	4222	tags=38%, list=22%, signal=30%	477/1674/5101/287/6331/6330/5239/23363/5348/1000/6326/58494/4619/29119/2258/6323/9472/83700/3741/57731/93377/4892/7074/6324/6546/10052/859
GO:0120111	CC	neuron projection cytoplasm	89	0.530132	1.24939	0.00516815	0.0468825	0.0384379	3914	tags=28%, list=21%, signal=22%	547/8120/84871/4747/50632/7345/2899/3798/2898/4137/23237/4133/1740/4988/120892/84709/66000/4130/3800/9001/881/1742/57576/80128/667
GO:0097305	BP	response to alcohol	230	0.479659	1.1666	0.00516815	0.0468825	0.0384379	6508	tags=47%, list=34%, signal=31%	1268/5563/9370/111/4916/6422/6869/2903/3158/5179/117/1066/1036/6366/6363/9353/4747/1545/4880/108/1646/1582/6000/51208/1813/6608/1946/4986/266743/4129/114131/8431/4988/6586/9965/3351/2354/5020/7122/1393/3952/2155/54658/1141/1236/2822/6531/5737/2770/8647/107/3779/2/6517/6554/23209/552/5999/1581/5732/6690/3248/551/939/687/3747/131/2741/2550/114/1571/3490/3625/7412/3558/3284/3283/7049/5997/2660/5727/…
GO:0051954	BP	positive regulation of amine transport	40	0.598555	1.35883	0.00524251	0.047446	0.0388998	4342	tags=57%, list=23%, signal=44%	3745/6860/7432/1813/5865/183/6857/4986/9607/10991/5020/553/1141/2668/7200/6387/552/5021/551/6865/4923/2550/59272
GO:0042063	BP	gliogenesis	280	0.470234	1.14921	0.00524251	0.047446	0.0388998	5724	tags=39%, list=30%, signal=28%	5649/5354/4916/1272/4653/5179/2255/6900/2596/28999/5803/6547/1191/2147/9241/482/5324/10810/4118/443/4915/4920/6608/400746/1000/92737/4036/26228/4099/2247/4137/26011/429/8941/26227/54587/4692/1600/6833/8929/22891/10100/23500/7732/2670/64805/79727/89927/5270/3953/5076/23418/2290/8506/1812/2737/56978/10893/146433/2043/3084/7101/163175/57165/93377/5309/6886/1524/7042/5764/4919/6657/7223/7852/3400/502…
GO:0051968	BP	positive regulation of synaptic transmission, glutamatergic	29	0.634734	1.41749	0.00525301	0.0474624	0.0389133	5253	tags=72%, list=28%, signal=52%	22871/5649/27092/9378/7143/4920/4914/59284/1812/54413/57555/5021/57616/27091/10368/729230/85358/10369/135/5743/6347
GO:0033391	CC	chromatoid body	12	0.733828	1.49316	0.00525659	0.0474624	0.0389133	1612	tags=33%, list=9%, signal=31%	163589/29118/56165/84944
GO:0140115	BP	export across plasma membrane	63	0.556524	1.29411	0.00531688	0.0478318	0.0392162	5082	tags=52%, list=27%, signal=38%	3745/477/486/343450/6543/482/480/5348/479/9992/222962/3737/8671/492/3741/3757/495/6565/5174/10786/123041/23704/496/5243/3752/478/6546/23630/30819/4878/9429/2697/146802
GO:0014031	BP	mesenchymal cell development	88	0.52371	1.23376	0.00531688	0.0478318	0.0392162	5895	tags=51%, list=31%, signal=35%	2348/9723/223117/8854/2066/55698/9464/5308/6608/1000/5979/9965/8929/1910/57556/56920/8092/2668/10500/3084/54437/2303/340665/3670/655/26508/8482/57057/1908/30812/3357/10371/6899/1909/6469/3911/80031/8828/10501/8829/54910/1906/64218/10512/2335
GO:0050796	BP	regulation of insulin secretion	144	0.499858	1.19922	0.00531688	0.0478318	0.0392162	3422	tags=30%, list=18%, signal=25%	1268/111/640/6422/3745/1113/2850/169026/9971/222546/5950/846/2695/6616/143425/1813/4856/25924/150/2645/2852/1946/4760/114131/8431/9607/9024/6833/7021/3952/2822/3741/388581/2641/7200/2281/2044/63036/3670/57555/8938/8447/51738
GO:0042573	BP	retinoic acid metabolic process	33	0.610704	1.37195	0.00532219	0.0478318	0.0392162	5690	tags=73%, list=30%, signal=51%	125/8854/1381/126/1382/124/339761/54905/1543/220/54658/54577/1558/340665/131/5947/1562/1592/59342/83875/54576/10170/1551/1576
GO:0060193	BP	positive regulation of lipase activity	67	0.551238	1.2851	0.00539124	0.0483402	0.0396329	5931	tags=57%, list=31%, signal=39%	335/337/185/117/3815/148/338328/183/2247/3356/350/5156/1902/2099/5322/440503/553/2260/64805/5319/10316/395/552/3491/5406/2261/3357/115727/1909/9290/116519/6401/8698/5159/3702/7294/2263/5330
GO:0015399	MF	primary active transmembrane transporter activity	149	0.49751	1.19453	0.00539124	0.0483402	0.0396329	5939	tags=32%, list=31%, signal=22%	10351/477/10350/340273/23460/154664/491/84239/64241/480/79901/24/479/10349/94160/10060/6833/5244/1339/492/344905/170712/534/8647/495/64137/496/5243/225/478/64240/3764/493/21/84701/9429/1346/26154/368/85320/9619/1244/19/489/10057/155066/23457
GO:0010001	BP	glial cell differentiation	211	0.486466	1.18077	0.0054656	0.0488562	0.040056	5702	tags=39%, list=30%, signal=28%	5649/5354/4916/1272/4653/2255/6900/2596/28999/5803/6547/1191/2147/9241/10810/4118/443/4915/4920/6608/400746/1000/92737/4099/2247/4137/26011/429/26227/54587/1600/8929/22891/10100/23500/7732/2670/79727/5270/5076/23418/8506/1812/2737/56978/10893/146433/2043/3084/7101/163175/93377/6886/5764/4919/6657/7223/7852/3400/55553/30812/1959/8521/5453/664/4035/170825/6469/23529/9639/128853/5454/135/51176/2817/…
GO:0001558	BP	regulation of cell growth	401	0.458941	1.129	0.0054656	0.0488562	0.040056	6653	tags=41%, list=35%, signal=27%	3249/9723/223117/6422/9211/185/3479/22999/2045/221476/23105/23566/85004/8153/9353/347252/92304/6860/7143/2147/57144/60676/84258/4009/10718/9699/1382/6423/93649/3897/8643/57611/1826/2273/4856/11170/91584/6098/183/1946/6857/4099/147906/10516/4137/1630/2786/4133/26585/6586/9423/2258/9362/10235/4803/1410/3488/10439/9856/3872/4881/5270/54825/57556/56920/9472/344901/51760/3484/59284/3373/10500/23111/24…
GO:0008392	MF	arachidonic acid epoxygenase activity	16	0.698012	1.47246	0.00546771	0.0488562	0.040056	4169	tags=69%, list=22%, signal=54%	1559/1557/1579/1548/1555/1553/1558/1549/1562/1572/1571
GO:1904861	BP	excitatory synapse assembly	25	0.645895	1.42367	0.00548753	0.0489768	0.0401549	4395	tags=60%, list=23%, signal=46%	22871/4884/4916/22865/7476/9378/9379/5789/94030/2895/869/57555/26045/64101/85358
GO:0072376	BP	protein activation cascade	17	0.693401	1.46936	0.00554875	0.0494662	0.0405561	4446	tags=76%, list=23%, signal=59%	2192/2266/350/2162/2243/2814/2244/2165/462/2815/2157/2811/3818
GO:0099175	BP	regulation of postsynapse organization	84	0.534452	1.25651	0.00561432	0.0498786	0.0408943	5324	tags=45%, list=28%, signal=33%	547/22871/5649/4884/4916/7476/2045/5063/158866/816/23316/1000/57497/8499/23237/5789/11141/94030/120892/2895/2043/26115/869/1627/51738/26052/2213/91752/26045/58504/51086/85358/10458/6792/8828/4897/80823/2534
GO:0008585	BP	female gonad development	105	0.520444	1.23557	0.00561432	0.0498786	0.0408943	4791	tags=39%, list=25%, signal=29%	64478/63951/6422/3623/9468/9353/5241/269/658/174/23414/6092/132625/3815/6586/5156/54361/56956/2099/431707/3952/2/9510/10468/4313/668/2492/5798/3973/5806/2069/1299/1588/7490/3625/8322/4327/7026/89766/4846/2516
GO:0055123	BP	digestive system development	135	0.505354	1.20835	0.00561432	0.0498786	0.0408943	6341	tags=53%, list=33%, signal=36%	887/6422/6425/8854/3158/2255/2695/6423/93649/4852/10736/2735/140628/348093/51208/3815/6608/2304/429/1543/5979/56033/5156/5915/2295/6343/79827/5697/3481/1910/6943/2736/2254/60529/83881/1028/2737/2294/6474/7042/8642/5021/4838/8626/123872/56034/51339/3549/3202/6299/7481/6469/64321/5919/3239/7043/6909/2300/79971/1281/7048/1990/3572/2263/91461/7547/51057/5125/5310/256297/7474/25803
													Table S9
