# Supplementary material for: Immune infiltration and prognosis in gastric cancer: role of NAD+ metabolism-related markers
Source: PeerJ. 2024 Jul 31;12:e17833. doi: 10.7717/peerj.17833 (PMC11297443; doi:10.7717/peerj.17833)
Supplement: Supplemental Information 10 — A total of 53 KEGG pathways were enriched. [file peerj-12-17833-s010.xlsx]

## Sheet: Sheet1
ID	Description	setSize	enrichmentScore	NES	pvalue	p.adjust	qvalues	rank	leading_edge	core_enrichment
hsa04610	Complement and coagulation cascades	85	0.617862	1.4597	9.999e-05	9.999e-05	0.00634147	4725	tags=65%, list=25%, signal=49%	1380/730/5104/7448/2266/5624/1191/2147/729/10878/5648/2160/5340/2153/3827/718/10877/2162/2243/721/2159/1378/720/2155/3078/2244/2165/716/2/462/7035/735/5627/3075/3053/9002/710/5345/715/1361/5054/2157/7056/1675/7450/81494/5327/725/1379/731/5055/3818/4153/3426/2149
hsa04260	Cardiac muscle contraction	83	0.586352	1.38383	9.999e-05	9.999e-05	0.00634147	6158	tags=55%, list=32%, signal=38%	477/27092/486/845/4634/59285/6547/6543/482/10345/785/480/7134/781/779/1339/55799/9254/59284/170712/786/783/125965/70/775/3270/6262/7169/7139/478/4635/6546/7137/4624/27091/10368/10369/84701/1346/341947/4625/778/4633/489/59283/7168
hsa04726	Serotonergic synapse	112	0.544499	1.29958	9.999e-05	9.999e-05	0.00634147	5658	tags=56%, list=30%, signal=40%	2792/111/774/1559/2775/3358/3359/2561/7220/7166/1557/4129/2786/3356/779/3763/3351/3360/2788/170572/3751/9177/121278/6570/773/285242/2770/3363/1558/6532/3354/5579/2562/5582/6571/3708/775/1843/3357/3355/8605/1562/246/10681/247/5567/2784/239/5742/3362/2791/59345/240/94235/23236/5743/3765/10411/3361/3350/2560/200909/778
hsa04022	cGMP-PKG signaling pathway	165	0.52542	1.26994	9.999e-05	9.999e-05	0.00634147	6056	tags=53%, list=32%, signal=37%	111/477/185/486/84699/8471/155/6547/4880/108/6543/5350/491/482/480/1258/148/150/3827/3778/154/779/4985/10335/5138/146/5139/4638/5593/10398/10242/492/4881/1910/2770/27094/107/4776/3779/152/147/91807/157855/2982/4879/10000/5592/4208/3708/2977/775/5294/83447/478/6546/4624/114/2983/3764/196883/151/1909/23533/493/9586/4882/27345/4878/4772/4846/153/23236/5997/5140/51806/8654/4205/4625/340156/778/7225/3…
hsa04976	Bile secretion	87	0.567375	1.34182	0.00019998	0.00019998	0.00634147	4373	tags=49%, list=23%, signal=38%	111/6344/477/9971/486/10720/108/482/64241/480/6555/361/54575/6579/123264/570/8431/8671/10864/5244/6343/54658/9376/7366/54577/10599/8647/107/7363/6554/1581/5243/478/760/54578/64240/114/5567/79799/343/196883/200931/7365
hsa04911	Insulin secretion	86	0.565663	1.33702	0.00019998	0.00019998	0.00634147	4816	tags=50%, list=25%, signal=37%	27445/111/2740/477/486/117/84699/116/9699/2695/108/482/886/6514/6616/816/480/2645/3778/779/3780/6833/10242/27094/107/3779/2641/157855/5579/1131/5582/775/6262/478/3782/2864/114/5567/196883/815/9586/27345/23236
hsa04727	GABAergic synapse	89	0.559974	1.32566	0.00019998	0.00019998	0.00634147	4925	tags=55%, list=26%, signal=41%	2792/111/774/2567/2569/2566/2556/6538/108/2775/2572/2561/2558/55879/2786/9568/779/6540/3763/10991/2788/2554/2568/773/2770/107/9001/5579/2562/5582/2564/2565/5334/775/6539/23710/2550/10681/114/5567/200959/196883/2784/2559/92745/2791/59345/94235/2570
hsa05414	Dilated cardiomyopathy	95	0.555797	1.31917	0.00019998	0.00019998	0.00634147	5873	tags=63%, list=31%, signal=44%	111/27092/1674/3479/4634/59285/6547/6442/108/6543/8516/5350/6445/785/7134/183/3908/781/779/1756/6444/55799/8515/9254/3674/4607/59284/786/107/3680/783/3679/7042/70/775/6262/7169/7273/7139/6546/7137/4624/114/27091/5567/10368/196883/10369/22801/7043/3690/153/4625/284217/778/4633/7040/3678/3676/489
hsa04974	Protein digestion and absorption	103	0.547982	1.30409	0.00029997	0.00029997	0.00634211	5626	tags=58%, list=30%, signal=41%	6564/477/1310/486/1286/1285/1359/2006/84570/1287/6547/1288/1357/6543/482/11136/1280/480/1297/1360/340024/7373/6519/5644/1296/81578/1295/136227/153201/643834/7512/1302/120103/10136/63036/440387/256076/51032/57642/1361/478/6546/1299/23436/5222/91522/1307/59272/1504/1300/255631/131873/5645/169044/1292/1293/4225/1281/285641/3769
hsa04514	Cell adhesion molecules	136	0.536753	1.28984	0.00029997	0.00029997	0.00634211	5811	tags=55%, list=31%, signal=39%	9071/26050/57863/22871/152404/9074/22854/79679/5010/22865/1272/6403/6900/9378/149461/84189/933/8516/57689/257194/9379/3897/57502/51208/23114/139065/1000/8174/4099/9369/58494/5789/4685/94030/84631/23705/927/7122/114798/4684/83700/8506/3680/54413/6402/137075/5802/1013/5797/57555/926/3385/959/1462/6383/4359/3384/940/64101/7412/5175/84628/6401/947/1003/4897/9080/3684/9073/100288814/5788/64115/1002/36…
hsa04261	Adrenergic signaling in cardiomyocytes	149	0.532791	1.28409	0.00029997	0.00029997	0.00634211	6439	tags=56%, list=34%, signal=38%	6332/111/477/185/27092/486/84699/5502/6331/4634/6330/59285/6547/108/6543/5350/491/482/785/816/480/7134/148/183/781/154/779/55799/146/9254/492/5523/5522/59284/786/2770/107/147/783/10000/70/186/775/6262/7169/6324/5294/7139/478/4635/6546/7137/4624/114/27091/5567/10368/196883/23533/493/10369/815/9586/153/23236/51806/11069/10411/5521/5600/4625/778/4633/163688/489/5330/64764/59283/146850/7168/6300/115/…
hsa05033	Nicotine addiction	40	0.647827	1.47301	0.0003	0.0003	0.00634211	3155	tags=60%, list=17%, signal=50%	774/2567/2903/2569/57030/2566/2556/246213/2891/2561/2893/2558/55879/2890/1137/2554/2568/773/1141/2892/8973/2562/2564/2565
hsa05032	Morphine addiction	91	0.554331	1.31346	0.00039996	0.00039996	0.00780489	7014	tags=73%, list=37%, signal=46%	2792/111/774/2567/2569/2566/2556/108/2775/2561/5136/27115/2558/55879/2786/9568/4988/3763/50940/5153/5138/2788/5137/5139/2554/2568/773/1812/2770/107/5579/2562/5582/2564/2565/10846/2550/10681/114/5567/200959/196883/2784/2559/2791/59345/94235/2570/5140/3765/2555/2560/8622/134/2869/5142/140679/115/113/54331/3762/5141/157/3760/5143/2557
hsa00830	Retinol metabolism	65	0.586427	1.36862	0.00059994	0.00059994	0.0108711	6005	tags=66%, list=32%, signal=45%	125/9227/8854/316/126/10720/1559/127/124/339761/54575/54905/195814/1543/1548/145226/220/6121/54658/8630/1555/7366/54577/7363/1558/1549/1544/340665/131/216/1562/54578/1592/79799/7365/50700/54576/10170/54657/1551/1576/158835/9249
hsa04723	Retrograde endocannabinoid signaling	140	0.525447	1.26365	0.00069993	0.00069993	0.0118374	5503	tags=41%, list=29%, signal=29%	1268/2792/111/774/2567/22999/2569/57030/2566/2556/246213/2891/108/2775/5602/2561/2893/2558/55879/2786/2890/779/3763/2788/2554/2568/773/2892/2770/107/2915/5579/2911/2562/5582/2564/2565/3708/775/10681/114/5567/200959/196883/2784/11343/2559/2791/59345/94235/23236/2570/5743/3765/2555/2560/5600
hsa04512	ECM-receptor interaction	88	0.547708	1.296	0.00089991	0.00089991	0.0142683	6859	tags=72%, list=36%, signal=46%	341640/5649/1311/7060/7448/1286/63923/7148/1285/7143/1287/1288/8516/9899/1280/80144/158326/1297/22987/3908/9900/2814/8515/1834/1101/3674/948/3680/51206/3679/2815/256076/22798/1758/7057/3915/1299/7450/2811/3911/3339/22801/131873/7059/3690/7058/3910/1292/1293/255743/3913/284217/3678/3676/2335/3371/1278/6385/1284/3672/10319/3694/1291
hsa05410	Hypertrophic cardiomyopathy	90	0.544607	1.2899	0.0009999	0.0009999	0.0149211	6158	tags=63%, list=32%, signal=43%	5563/27092/1674/3479/4634/59285/6547/6442/6543/8516/6445/785/7134/183/3908/781/779/1756/6444/55799/8515/9254/3674/4607/59284/786/3680/783/3679/7042/70/775/6262/7169/7273/7139/53632/6546/7137/4624/27091/10368/10369/22801/7043/3690/4625/1906/284217/778/4633/7040/3678/3676/489/59283/7168
hsa00982	Drug metabolism - cytochrome P450	67	0.570612	1.33425	0.00149985	0.00149985	0.0211382	7044	tags=75%, list=37%, signal=47%	125/2938/316/2939/126/10720/1559/127/124/54575/2949/1557/4129/2327/1548/27306/54658/1555/7366/54577/2946/7363/1558/653689/1549/1544/2947/2330/131/54578/1571/79799/7365/2326/2953/54576/2940/222/54657/1576/2328/2329/221/2941/218/221357/1565/54600/10941/130
hsa04972	Pancreatic secretion	102	0.533084	1.26807	0.00179982	0.00179982	0.0240308	4816	tags=49%, list=25%, signal=37%	111/6344/477/1811/486/1359/1179/1357/108/491/482/886/480/7220/3778/1360/5644/8671/5322/5408/6343/492/107/5319/9635/5579/10136/1131/5582/391013/63036/440387/3708/51032/26279/6262/5407/8399/5406/1361/478/760/683/114/23436/196883/1504/493/5645/23236
hsa04713	Circadian entrainment	97	0.53651	1.27412	0.00189981	0.00189981	0.0240976	5146	tags=51%, list=27%, signal=37%	2792/111/2903/117/4842/116/2891/108/6261/2775/8911/816/8913/2893/2786/2890/3763/2788/5593/2892/6263/2770/107/8912/55811/5187/5579/2982/51655/5592/5582/3708/2977/775/6262/10681/114/5567/2983/196883/2784/4543/815/2791/59345/94235/23236/3765/51806
hsa02010	ABC transporters	45	0.599474	1.3726	0.00219978	0.00219978	0.0253659	5939	tags=62%, list=31%, signal=43%	10351/10350/340273/23460/154664/64241/1672/24/10349/94160/10060/6833/5244/8647/64137/5243/225/64240/21/9429/26154/368/85320/9619/1244/19/10057/23457
hsa04724	Glutamatergic synapse	113	0.525621	1.25491	0.00219978	0.00219978	0.0253659	4819	tags=46%, list=25%, signal=35%	2792/111/2903/57030/246213/2891/2913/108/6512/2775/2901/2899/9229/2898/9455/2917/7220/2893/6506/2914/2786/2890/10991/2788/50944/6511/2900/773/2892/2770/2916/107/2915/5579/2911/5582/3708/1742/775/8605/10681/114/5567/2897/196883/2784/85358/2791/59345/94235/23236/5337
hsa04721	Synaptic vesicle cycle	78	0.549355	1.29293	0.00259974	0.00259974	0.0286745	4246	tags=36%, list=22%, signal=28%	440279/774/22999/57030/246213/6572/6538/50617/6512/6616/6857/6506/525/6540/6511/6530/6570/773/6531/534/6532/6571/23025/10814/26052/6539/9152/1759
hsa00980	Metabolism of xenobiotics by cytochrome P450	73	0.553603	1.29912	0.0029997	0.0029997	0.0317074	7044	tags=68%, list=37%, signal=43%	125/2938/2939/126/1545/10720/1559/127/124/54575/2949/1543/1548/27306/54658/1555/1553/7366/54577/2946/7363/653689/1549/1544/1645/2947/131/54578/1572/1571/79799/7365/374875/2953/54576/2940/222/54657/1576/27294/221/2941/6822/218/3290/221357/1565/54600/10941/130
hsa05412	Arrhythmogenic right ventricular cardiomyopathy	77	0.546156	1.28488	0.00379962	0.00379962	0.0375791	5873	tags=57%, list=31%, signal=40%	27092/1674/88/59285/6547/6442/6543/8516/6445/785/1000/3908/781/779/29119/1756/6444/83439/89/55799/8515/9254/3674/59284/786/3680/783/1496/3679/775/6262/6546/27091/10368/10369/22801/3690/2697/51176/284217/778/3678/3676/489
hsa04923	Regulation of lipolysis in adipocytes	57	0.566462	1.31293	0.0039996	0.0039996	0.0375791	5870	tags=61%, list=31%, signal=43%	4886/111/8471/63924/2167/5346/155/5733/108/4852/154/5593/4881/2770/107/10000/5592/7253/100509620/364/1081/114/5567/196883/11343/5742/4878/153/5743/5140/5293/3991/3667/134/11145
hsa05217	Basal cell carcinoma	63	0.560119	1.30555	0.0039996	0.0039996	0.0375791	6323	tags=57%, list=33%, signal=38%	64399/7476/8643/2735/7483/7484/6608/83439/54361/7477/2736/11211/2737/374654/7471/51384/7482/7475/80326/8326/8325/7478/7480/8324/2535/7481/6469/8322/5727/8321/51176/650/4616/7474/89780/81029
hsa04270	Vascular smooth muscle contraction	133	0.508528	1.22115	0.00469953	0.00469953	0.0405854	5658	tags=52%, list=30%, signal=37%	111/185/4629/4880/108/148/183/3778/779/10335/72/94274/4628/146/5322/4638/553/10398/10242/4881/27094/59/107/5319/3779/147/91807/157855/796/797/5579/2982/4879/552/5592/5582/10267/391013/800/3708/2977/775/26279/551/8399/1908/4660/8605/10266/114/5567/2983/10268/196883/1909/5739/4882/27345/4878/23236/135/51806/84647/5583/79924/340156/1906/10203/778
hsa05204	Chemical carcinogenesis - DNA adducts	65	0.554859	1.29495	0.00479952	0.00479952	0.0405854	5690	tags=58%, list=30%, signal=41%	2938/2939/1545/10720/1559/1646/54575/2949/1557/1543/1548/27306/54658/1553/7366/54577/2946/7363/1558/653689/1549/1544/64816/2947/6799/1562/54578/1571/79799/7365/374875/5743/2953/54576/2940/54657/1551/1576
hsa04725	Cholinergic synapse	113	0.517265	1.23496	0.00479952	0.00479952	0.0405854	7569	tags=67%, list=40%, signal=41%	2792/111/774/84699/60482/6572/108/1129/2775/816/56479/1133/2786/779/1137/3768/3763/43/2788/773/1141/1143/1132/8973/2770/107/814/5579/10000/1136/1131/5582/3708/1103/775/5294/10681/114/9132/5567/196883/2784/23533/815/2791/9586/59345/3785/94235/23236/3786/1128/5293/2534/1139/778/3761/5330/64764/146850/100134444/115/113/54331/596/3760/3709/5578/3845/2353/5332/2771/3770/5290/5568/55970
hsa04978	Mineral absorption	60	0.560609	1.30273	0.00529947	0.00529947	0.0420122	4566	tags=38%, list=24%, signal=29%	7018/477/1811/486/10568/6547/6543/491/482/480/79901/340024/140803/115019/492/4499/6569/478/4489/6546/113235/55503/493
hsa04925	Aldosterone synthesis and secretion	98	0.523825	1.24432	0.00529947	0.00529947	0.0420122	5971	tags=53%, list=31%, signal=37%	111/477/185/1583/84699/3777/108/491/482/8911/816/8913/480/183/1589/779/5587/5138/492/4881/4158/107/8912/5443/814/6770/5579/5582/51305/3708/775/478/114/5567/196883/3284/493/57118/815/9586/3283/4878/23236/3164/51806/3991/778/163688/1585/5330/64764/23683
hsa04310	Wnt signaling pathway	169	0.492852	1.19211	0.00579942	0.00579942	0.0445825	5072	tags=36%, list=27%, signal=26%	1501/22943/6422/6425/7476/340419/11197/6424/284654/343637/4316/6423/144165/5602/816/57216/84870/7483/7484/4920/83439/54361/166336/80319/23500/27123/7477/5176/11211/4776/7471/2487/5579/51384/164284/5582/7482/4919/7475/80326/8326/8325/7478/85409/7480/90665/8324/5567/2535/7481/102723796/8322/64321/815/4772/23236/8321/50964/7091/51176
hsa04934	Cushing syndrome	155	0.498311	1.20205	0.00659934	0.00659934	0.0492397	5099	tags=41%, list=27%, signal=30%	111/185/7476/1583/84699/1586/3777/3776/1395/108/8911/816/8913/7483/7484/3739/183/1589/779/1394/50940/83439/54361/7477/4158/11211/2770/107/8912/7471/5443/6770/51384/51655/7482/3708/7475/80326/775/8326/56246/5087/8325/7478/7480/8324/114/5567/196883/2535/7481/8322/1030/3284/815/9586/3283/2516/23236/1392/8321/51176/3164
hsa04927	Cortisol synthesis and secretion	65	0.550828	1.28554	0.00679932	0.00679932	0.0492823	6001	tags=58%, list=32%, signal=40%	111/185/1583/84699/1586/3777/3776/108/8911/8913/3739/183/1589/779/4158/107/8912/5443/6770/3708/775/56246/5087/114/5567/196883/190/3284/9586/3283/2516/23236/3164/778/8622/5330/64764/1584
hsa04918	Thyroid hormone synthesis	75	0.534611	1.25616	0.010399	0.010399	0.0732792	6439	tags=55%, list=34%, signal=36%	111/7276/477/6528/213/486/84699/108/482/480/7173/433/4036/2878/50506/107/405753/5579/5582/7253/3708/2882/1081/53905/478/2880/114/7038/5567/196883/9586/23236/493869/5172/389434/5330/64764/257202/432/115/113
hsa04975	Fat digestion and absorption	43	0.574444	1.31149	0.0114989	0.0114989	0.0788399	5153	tags=53%, list=27%, signal=39%	335/337/338/8513/64241/29881/1208/5322/5408/948/4547/5319/391013/26279/5407/8399/5406/2168/64240/8611/80168/8613/84647
hsa04924	Renin secretion	69	0.53369	1.24912	0.0139986	0.0139986	0.0934533	5931	tags=57%, list=31%, signal=39%	111/185/117/116/155/1179/5136/183/3778/154/779/5153/5137/5139/5593/4881/2770/9635/2982/3708/2977/5732/775/1908/5567/2983/1909/4878/153/23236/5140/51806/358/1906/778/134/163688/22802/5330
hsa04970	Salivary secretion	92	0.513552	1.21737	0.0151985	0.0151985	0.0988619	4816	tags=47%, list=25%, signal=35%	111/1470/477/486/4842/362/155/108/491/482/480/148/3778/154/4025/146/1473/5593/492/6263/107/147/5579/2982/1131/5592/5582/3708/2977/478/683/727897/114/5567/2983/196883/55503/1472/820/493/54831/153/23236
hsa04916	Melanogenesis	101	0.508754	1.20975	0.0160984	0.0160984	0.102098	6439	tags=53%, list=34%, signal=35%	111/7476/84699/7306/108/2775/816/7483/7484/3815/83439/54361/1638/7477/1910/11211/2770/107/7471/5443/5579/51384/5582/7482/7475/80326/8326/8325/7478/7480/4286/8324/114/5567/196883/2535/7481/8322/815/23236/8321/51176/51806/1906/163688/5330/434/64764/7474/89780/81029/115/810/113
hsa00140	Steroid hormone biosynthesis	57	0.543332	1.25932	0.0169983	0.0169983	0.105176	6001	tags=61%, list=32%, signal=42%	1583/1586/1545/10720/1646/54575/1589/1543/6718/9420/54658/8630/7366/54577/7363/1544/1581/1645/3294/6716/1588/54578/1571/79799/7365/3284/374875/3283/54576/54657/1551/3293/1576/1585/1584
hsa04360	Axon guidance	181	0.476321	1.15416	0.0183982	0.0183982	0.111127	5324	tags=40%, list=28%, signal=29%	9723/22854/223117/2045/56896/151449/5063/285220/9353/56963/91653/57144/57689/3897/658/816/137970/6092/6608/7220/91584/1946/1630/1949/4917/6586/2042/9423/54361/5365/8633/2046/10398/2051/57556/56920/10500/2770/4776/2043/59277/6585/54437/6387/2044/655/7223/7852/22885/8482/7224/6091/7222/10371/64221/2242/64101/6469/1073/90249/10154/815/84628/80031/5336/5727/29984/10501/84552/8829/5293/2534
hsa00350	Tyrosine metabolism	35	0.577289	1.30141	0.0203061	0.0203061	0.119798	3886	tags=46%, list=20%, signal=36%	125/316/126/7306/127/124/7173/4129/8639/1638/3081/137362/6898/3242/131/5409
hsa03320	PPAR signaling pathway	75	0.518017	1.21717	0.0242976	0.0242976	0.140089	3862	tags=32%, list=20%, signal=26%	335/28965/9370/3158/33/729359/345/2167/6258/5346/1582/440503/126129/948/2170/10580/5360/4023/100509620/364/1581/81616/2168/9415
hsa04730	Long-term depression	59	0.533297	1.23828	0.0251975	0.0251975	0.142049	4122	tags=39%, list=22%, signal=31%	3479/4842/2891/6261/2775/2890/1394/5593/773/2892/2895/2770/2781/5579/2911/2982/5592/5582/3708/2977/10842/8605/2983
hsa04971	Gastric acid secretion	76	0.512201	1.20437	0.029597	0.029597	0.163224	6893	tags=58%, list=36%, signal=37%	6750/887/111/477/389015/3776/3773/108/482/816/115111/480/9992/4638/2770/107/91807/5579/2520/495/1131/5582/3708/496/478/760/114/5567/196883/815/6752/23236/3274/51806/340156/3758/163688/5330/115/810/113/3772/54207/3709
hsa04742	Taste transduction	85	0.505994	1.19541	0.0316968	0.0316968	0.16669	6147	tags=58%, list=32%, signal=39%	10021/2556/80835/22953/6328/6338/6340/3359/5136/6326/2558/2914/9568/6335/5153/3351/5137/170572/2554/9177/773/285242/3354/2911/342372/1131/775/5028/3355/2550/114/5567/196883/2784/2559/23236/255022/50838/83756/2555/50839/3350/259295/200909/346562/5030/5330/5024/259294
hsa04371	Apelin signaling pathway	138	0.481419	1.15741	0.0317968	0.0317968	0.16669	6893	tags=54%, list=36%, signal=34%	5563/2792/111/185/4842/4634/5346/6547/108/6543/6261/440738/2786/2788/4638/6263/2770/59/107/100506013/91807/55811/814/10000/22808/4208/3708/6262/441925/5294/5054/53632/4635/6546/10681/1490/114/5567/187/5327/196883/2784/23533/2791/1958/4854/59345/10891/4846/94235/23236/10365/7350/84557/5140/10014/51806/3991/4205/340156/4633/163688/5330/6237/146850/115/810/113/54331/5564/4209/5581/4088/3709
hsa04540	Gap junction	88	0.502296	1.18855	0.0321968	0.0321968	0.16669	7531	tags=61%, list=40%, signal=37%	111/1950/108/10382/3358/1813/3356/7278/80310/5156/57369/1902/5593/1812/347733/2770/107/2915/5579/2911/2982/84617/5592/5582/3708/2977/56034/3357/114/5567/2983/196883/112714/7846/153/23236/2697/5159/7280/347688/5330/10381/115/113/7082/1956/51807/3709/81027/5578/3845/5332/2771/5568
hsa04921	Oxytocin signaling pathway	153	0.4752	1.14582	0.0352965	0.0352965	0.179083	7557	tags=59%, list=40%, signal=36%	5563/111/27092/59285/108/6261/2775/785/816/781/779/3768/3763/5020/55799/4638/9254/10398/4881/59284/6263/786/2770/107/4776/91807/783/814/5579/2982/5582/4208/3708/2977/5021/775/6262/5294/53632/4660/8605/114/27091/5567/2983/10368/196883/23533/57118/10369/815/4882/4878/4772/4846/23236/5997/5743/3765/51806/340156/778/3761/163688/952/5330/59283/146850/4773/100134444/115/810/113/5564/1956/3762/3760/5477…
hsa04950	Maturity onset diabetes of the young	24	0.595363	1.30653	0.0387814	0.0387814	0.192907	2126	tags=33%, list=11%, signal=30%	3175/222546/6514/2645/4760/5313/5078/50674
hsa03430	Mismatch repair	23	-0.452352	-1.95261	0.0434783	0.0434783	0.208108	1700	tags=52%, list=9%, signal=48%	5424/4436/5425/6119/5984/5985/3978/5982/6742/9156/5983/5111
hsa03060	Protein export	23	-0.396588	-1.7119	0.0434783	0.0434783	0.208108	11449	tags=96%, list=60%, signal=38%	6734/29927/11231/6727/55176/23478/6730/28972/9789/60559/23480/196294/5018/58477/83943/90701/6728/6731/6729/3309/10952/6726
										Table S10
