# Supplementary material for: Immune infiltration and prognosis in gastric cancer: role of NAD+ metabolism-related markers
Source: PeerJ. 2024 Jul 31;12:e17833. doi: 10.7717/peerj.17833 (PMC11297443; doi:10.7717/peerj.17833)
Supplement: Supplemental Information 11 [file peerj-12-17833-s011.xlsx]

## Sheet: Sheet1
		control			tumor
		Compound pore A	Compound pore B	Compound pore C	Compound pore A	Compound pore B	Compound pore C
	CIDEA	25.91	27.78	25.37	25.75	26.49	25.84
	gapdh	23.65	23.74	23.96	22.65	22.61	22.87
	△Ct	2.26	4.04	1.41	3.1	3.88	2.97
	-△△Ct	0.84	-0.16	1.56	0
	2^-△△Ct	1.79005	0.895025	2.94854	1	1	1
	2^-△△Ct mean value	1.87787			1
		control			tumor
		Compound pore A	Compound pore B	Compound pore C	Compound pore A	Compound pore B	Compound pore C
	DNAJB13	27.32	27.69	26.37	29.75	28.41	30.38
	gapdh	23.65	23.74	23.96	22.65	22.61	22.87
	△Ct	3.67	3.95	2.41	7.1	5.8	7.51
	-△△Ct	3.43	1.85	5.1	0
	2^-△△Ct	10.7779	3.605	34.2968	1	1	1
	2^-△△Ct mean value	16.2265			1
		control			tumor
		Compound pore A	Compound pore B	Compound pore C	Compound pore A	Compound pore B	Compound pore C
	CST2	25.8	26.86	26.94	27.65	27.81	26.14
	gapdh	23.65	23.74	23.96	22.65	22.61	22.87
	△Ct	2.15	3.12	2.98	5	5.2	3.27
	-△△Ct	2.85	2.08	0.29	0
	2^-△△Ct	7.21	4.22807	1.22264	1	1	1
	2^-△△Ct mean value	4.22024			1
		control			tumor
		Compound pore A	Compound pore B	Compound pore C	Compound pore A	Compound pore B	Compound pore C
	THPO	27.45	27.26	26.79	29.68	28.77	27.79
	gapdh	23.65	23.74	23.96	22.65	22.61	22.87
	△Ct	3.8	3.52	2.83	7.03	6.16	4.92
	-△△Ct	3.23	2.64	2.09	0
	2^-△△Ct	9.38268	6.23332	4.25748	1	1	1
	2^-△△Ct mean value	6.62449			1
		control			tumor
		Compound pore A	Compound pore B	Compound pore C	Compound pore A	Compound pore B	Compound pore C
	ONECUT1	28.29	29.53	27.33	28.75	29.01	28.73
	gapdh	23.65	23.74	23.96	22.65	22.61	22.87
	△Ct	4.64	5.79	3.37	6.1	6.4	5.86
	-△△Ct	1.46	0.61	2.49	0
	2^-△△Ct	2.75108	1.52626	5.61778	1	1	1
	2^-△△Ct mean value	3.29837			1
		control			tumor
		Compound pore A	Compound pore B	Compound pore C	Compound pore A	Compound pore B	Compound pore C
	UPK1B	24.43	22.47	20.6	21.91	21.94	21.47
	gapdh	23.65	23.74	23.96	22.65	22.61	22.87
	△Ct	0.78	-1.27	-3.36	-0.74	-0.67	-1.4
	-△△Ct	-1.52	0.6	1.96	0
	2^-△△Ct	0.348686	1.51572	3.89062	1	1	1
	2^-△△Ct mean value	1.91834			1
		control			tumor
		Compound pore A	Compound pore B	Compound pore C	Compound pore A	Compound pore B	Compound pore C
	SNCG	26.32	25.64	25.71	26.58	26.82	26.36
	gapdh	23.65	23.74	23.96	22.65	22.61	22.87
	△Ct	2.67	1.9	1.75	3.93	4.21	3.49
	-△△Ct	1.26	2.31	1.74	0
	2^-△△Ct	2.39496	4.95883	3.34035	1	1	1
	2^-△△Ct mean value	3.56471			1
