# Supplementary material for: Immune infiltration and prognosis in gastric cancer: role of NAD+ metabolism-related markers
Source: PeerJ. 2024 Jul 31;12:e17833. doi: 10.7717/peerj.17833 (PMC11297443; doi:10.7717/peerj.17833)
Supplement: Supplemental Information 13 [file peerj-12-17833-s013.xls]

## Sheet: Sheet1
ITEM TO CHECK	IMPORTANCE	CHECKLIST
EXPERIMENTAL DESIGN
Definition of experimental and control groups	E	6
Number within each group	E	6
Assay carried out by core lab or investigator's lab?	D	6
Acknowledgement of authors' contributions	D	14
SAMPLE
Description	E	6/Supplementary materials -PCR procedure
Volume/mass of sample processed	D	6/Supplementary materials -PCR procedure
Microdissection or macrodissection	E	6/Supplementary materials -PCR procedure
Processing procedure	E	6/Supplementary materials -PCR procedure
If frozen - how and how quickly?	E	6/Supplementary materials -PCR procedure
If fixed - with what, how quickly?	E	6/Supplementary materials -PCR procedure
Sample storage conditions and duration (especially for FFPE samples)	E	6/Supplementary materials -PCR procedure
NUCLEIC ACID EXTRACTION
Procedure and/or instrumentation	E	6/Supplementary materials -PCR procedure
Name of kit and details of any modifications	E	6/Supplementary materials -PCR procedure
Source of additional reagents used	D	6/Supplementary materials -PCR procedure
Details of DNase or RNAse treatment	E	6/Supplementary materials -PCR procedure
Contamination assessment (DNA or RNA)	E	6/Supplementary materials -PCR procedure
Nucleic acid quantification	E	6/Supplementary materials -PCR procedure
Instrument and method	E	6/Supplementary materials -PCR procedure
Purity (A260/A280)	D	Supplementary materials -PCR procedure
Yield	D	Supplementary materials -PCR procedure
RNA integrity method/instrument	E	6/Supplementary materials -PCR procedure
RIN/RQI or Cq of 3' and 5' transcripts	E	6/Supplementary materials -PCR procedure
Electrophoresis traces	D
Inhibition testing (Cq dilutions, spike or other)	E	6/Supplementary materials -PCR procedure
REVERSE TRANSCRIPTION
Complete reaction conditions	E	6/Supplementary materials -PCR procedure
Amount of RNA and reaction volume	E	6/Supplementary materials -PCR procedure
Priming oligonucleotide (if using GSP) and concentration	E	6/Supplementary materials -PCR procedure
Reverse transcriptase and concentration	E	6/Supplementary materials -PCR procedure
Temperature and time	E	6/Supplementary materials -PCR procedure
Manufacturer of reagents and catalogue numbers	D	Supplementary materials -PCR procedure
Cqs with and without RT	D*
Storage conditions of cDNA	D	Supplementary materials -PCR procedure
qPCR TARGET INFORMATION
If multiplex, efficiency and LOD of each assay.	E	6/Supplementary materials -PCR procedure
Sequence accession number	E	6/Supplementary materials -PCR procedure
Location of amplicon	D	Supplementary materials -PCR procedure
Amplicon length	E	6/Supplementary materials -PCR procedure
In silico specificity screen (BLAST, etc)	E	6/Supplementary materials -PCR procedure
Pseudogenes, retropseudogenes or other homologs?	D	6/Supplementary materials -PCR procedure
Sequence alignment	D
Secondary structure analysis of amplicon	D	6/Supplementary materials -PCR procedure
Location of each primer by exon or intron (if applicable)	E	6/Supplementary materials -PCR procedure
What splice variants are targeted?	E	6/Supplementary materials -PCR procedure
qPCR OLIGONUCLEOTIDES
Primer sequences	E	6/Supplementary materials -PCR procedure
RTPrimerDB Identification Number	D
Probe sequences	D**
Location and identity of any modifications	E	6/Supplementary materials -PCR procedure
Manufacturer of oligonucleotides	D
Purification method	D	Supplementary materials -PCR procedure
qPCR PROTOCOL
Complete reaction conditions	E	6/Supplementary materials -PCR procedure
Reaction volume and amount of cDNA/DNA	E	6/Supplementary materials -PCR procedure
Primer, (probe), Mg++ and dNTP concentrations	E	6/Supplementary materials -PCR procedure
Polymerase identity and concentration	E	6/Supplementary materials -PCR procedure
Buffer/kit identity and manufacturer	E	6/Supplementary materials -PCR procedure
Exact chemical constitution of the buffer	D
Additives (SYBR Green I, DMSO, etc.)	E	6/Supplementary materials -PCR procedure
Manufacturer of plates/tubes and catalog number	D
Complete thermocycling parameters	E	6/Supplementary materials -PCR procedure
Reaction setup (manual/robotic)	D
Manufacturer of qPCR instrument	E	6/Supplementary materials -PCR procedure
qPCR VALIDATION
Evidence of optimisation (from gradients)	D
Specificity (gel, sequence, melt, or digest)	E	6/Supplementary materials -PCR procedure
For SYBR Green I, Cq of the NTC	E	6/Supplementary materials -PCR procedure
Standard curves with slope and y-intercept	E	6/Supplementary materials -PCR procedure
PCR efficiency calculated from slope	E	6/Supplementary materials -PCR procedure
Confidence interval for PCR efficiency or standard error	D	Supplementary materials -PCR procedure
r2 of standard curve	E	6/Supplementary materials -PCR procedure
Linear dynamic range	E	6/Supplementary materials -PCR procedure
Cq variation at lower limit	E	6/Supplementary materials -PCR procedure
Confidence intervals throughout range	D	Supplementary materials -PCR procedure
Evidence for limit of detection	E	6/Supplementary materials -PCR procedure
If multiplex, efficiency and LOD of each assay.	E	6/Supplementary materials -PCR procedure
DATA ANALYSIS
qPCR analysis program (source, version)	E	6/Supplementary materials -PCR procedure
Cq method determination	E	6/Supplementary materials -PCR procedure
Outlier identification and disposition	E	6/Supplementary materials -PCR procedure
Results of NTCs	E	6/Supplementary materials -PCR procedure
Justification of number and choice of reference genes	E	6/Supplementary materials -PCR procedure
Description of normalisation method	E	7/Supplementary materials -PCR procedure
Number and concordance of biological replicates	D	7/Supplementary materials -PCR procedure
Number and stage (RT or qPCR) of technical replicates	E	Supplementary materials -PCR procedure
Repeatability (intra-assay variation)	E	Supplementary materials -PCR procedure
Reproducibility (inter-assay variation, %CV)	D	7/Supplementary materials -PCR procedure
Power analysis	D	Supplementary materials -PCR procedure
Statistical methods for result significance	E	7/Supplementary materials -PCR procedure
Software (source, version)	E	7/Supplementary materials -PCR procedure
Cq or raw data submission using RDML	D	Supplementary materials -PCR procedure
Table 1. MIQE checklist for authors, reviewers and editors. All essential information (E) must be submitted with the manuscript. Desirable
information (D) should be submitted if available. If using primers obtained from RTPrimerDB, information on qPCR target, oligonucleotides,
protocols and validation is available from that source.
*: Assessing the absence of DNA using a no RT assay is essential when first extracting RNA. Once the sample has been validated as
RDNA-free, inclusion of a no-RT control is desirable, but no longer essential.
**: Disclosure of the probe sequence is highly desirable and strongly encouraged. However, since not all commercial pre-designed assay
vendors provide this information, it cannot be an essential requirement. Use of such assays is advised against.
